# Supplementary material for: Pan-cancer landscape of CENPO and its underlying mechanism in LUAD
Source: Respir Res. 2023 Apr 15;24:113. doi: 10.1186/s12931-023-02408-3 (PMC10105544; doi:10.1186/s12931-023-02408-3)
Supplement: Supplementary file 3 — Additional file 3: Table S1. The value of ROC, DFS, and OS curves of CENPO in multiple types of cancers. [file 12931_2023_2408_MOESM3_ESM.xlsx]

## Sheet: ROC
Table S1. The value of ROC curves of CENPO in multiple types of cancers.
cancer	ROC
ACC	0.559
BLCA	0.503
BRCA	0.524
CESC	0.546
CHOL	0.643
ESCA	0.618
GBM	0.6
HNSC	0.559
KIHC	0.657
UCEC	0.542
KIRP	0.538
LGG	0.687
LIHC	0.61
LUAD	0.625
LUSC	0.793
OV	0.586
PAAD	0.949
SKCM	0.695
STAD	0.713
TGCT	0.501

## Sheet: DFS
Table S1. The value of DFS curves of CENPO in multiple types of cancers.
ACC	0.00033
KICH	0.03
LIHC	0.0081
LUAD	0.014
READ	0.0093
SARC	0.0093
UVM	0.011
LGG	0.02
SKCM	0.042
MESO	0.08

## Sheet: OS
Table S1. The value of OS curves of CENPO in multiple types of cancers.
ACC	0.0012
KICH	0.0011
LIHC	0.0015
LUAD	0.0088
READ	0.046
SARC	0.0053
UVM	0.0064
LGG	8.4e-06
SKCM	0.00044
MESO	5.8e-05
