# Supplementary material for: Pan-cancer landscape of CENPO and its underlying mechanism in LUAD
Source: Respir Res. 2023 Apr 15;24:113. doi: 10.1186/s12931-023-02408-3 (PMC10105544; doi:10.1186/s12931-023-02408-3)
Supplement: Supplementary file 4 — Additional file 4: Table S2. The correlation of CENPO expression and ESTIMATEScore, ImmuneScore, and StromalScore in multiple types of cancers. [file 12931_2023_2408_MOESM4_ESM.xlsx]

## Sheet: Sheet1
Table S2. The correlation of CENPO expression and ESTIMATEScore, ImmuneScore, and StromalScore in multiple types of cancers.
cancer	StromalScore.cor	StromalScore.p	ImmuneScore.cor	ImmuneScore.p	ESTIMATEScore.cor	ESTIMATEScore.p
TCGA-GBM(N=152)	-0.456693	3.34431e-09	-0.510376	1.85608e-11	-0.506134	2.89338e-11
TCGA-GBMLGG(N=656)	0.0162179	0.678422	-0.031205	0.424925	-0.012225	0.75464
TCGA-LGG(N=504)	-0.143811	0.0012063	-0.146868	0.00094322	-0.149861	0.000737914
TCGA-CESC(N=291)	-0.310833	6.15286e-08	-0.33185	6.56061e-09	-0.363026	1.71116e-10
TCGA-LUAD(N=500)	-0.205747	3.50352e-06	-0.256726	5.7424e-09	-0.251491	1.18889e-08
TCGA-COAD(N=282)	-0.0769732	0.197478	0.0687461	0.249865	-0.00900813	0.880289
TCGA-COADREAD(N=373)	-0.0869057	0.0937449	0.0376993	0.467895	-0.0307053	0.554409
TCGA-LAML(N=149)	-0.0452811	0.58345	-0.161264	0.0494402	-0.121973	0.138376
TCGA-BRCA(N=1077)	-0.269853	1.9976e-19	-0.0587199	0.0540449	-0.172378	1.24728e-08
TCGA-ESCA(N=181)	-0.27267	0.000204327	-0.38784	6.87701e-08	-0.359454	6.71025e-07
TCGA-STES(N=569)	-0.37125	4.9178e-20	-0.320999	4.19894e-15	-0.373566	2.77023e-20
TCGA-SARC(N=258)	-0.0832826	0.182355	-0.144343	0.0203738	-0.129381	0.0378182
TCGA-KIRP(N=285)	0.0441751	0.457574	-0.0421142	0.478847	-0.00835763	0.888284
TCGA-KIPAN(N=878)	0.188239	1.90856e-08	0.166357	7.16339e-07	0.186562	2.56041e-08
TCGA-STAD(N=388)	-0.336422	1.01244e-11	-0.2121	2.52632e-05	-0.298792	1.92234e-09
TCGA-PRAD(N=495)	-0.26278	2.91423e-09	-0.233357	1.50932e-07	-0.268457	1.28336e-09
TCGA-UCEC(N=178)	-0.110983	0.140258	-0.199305	0.00764998	-0.18069	0.0157948
TCGA-HNSC(N=517)	-0.0854032	0.0522931	-0.0416846	0.344186	-0.0702598	0.110567
TCGA-KIRC(N=528)	0.120757	0.00546309	0.10017	0.0213311	0.122378	0.00486333
TCGA-LUSC(N=491)	-0.341879	6.58249e-15	-0.384721	9.08102e-19	-0.38652	6.06929e-19
TCGA-THYM(N=118)	-0.270333	0.00307	0.26333	0.0039632	0.0554674	0.550791
TCGA-LIHC(N=363)	-0.0835795	0.111904	0.0695977	0.18582	0.00479748	0.927421
TCGA-THCA(N=503)	-0.0384028	0.390087	-0.211802	1.64402e-06	-0.155394	0.000469259
TCGA-MESO(N=85)	0.0516266	0.638899	-0.04438	0.686725	-0.00656528	0.952448
TCGA-READ(N=91)	-0.1155	0.275617	-0.0718851	0.498319	-0.101591	0.337962
TCGA-SKCM-M(N=351)	-0.0688533	0.198132	-0.196527	0.000211394	-0.160577	0.00255054
TCGA-SKCM(N=452)	-0.0967751	0.0397249	-0.189336	5.1023e-05	-0.16672	0.000371354
TCGA-PAAD(N=177)	-0.0059942	0.936887	-0.0267902	0.72337	-0.0174521	0.817658
TCGA-OV(N=417)	-0.137139	0.00502683	-0.238238	8.59268e-07	-0.209747	1.57146e-05
TCGA-TGCT(N=132)	-0.251705	0.00359829	-0.346679	4.65744e-05	-0.383636	5.60664e-06
TCGA-PCPG(N=177)	-0.199192	0.00786089	-0.144461	0.055062	-0.182067	0.0152922
TCGA-SKCM-P(N=101)	-0.289426	0.00332906	-0.225079	0.0236368	-0.270752	0.00617188
TCGA-UVM(N=79)	0.232074	0.0395876	0.23744	0.0351172	0.247685	0.0277506
TCGA-UCS(N=56)	0.0357197	0.793818	-0.334129	0.0118429	-0.1853	0.171544
TCGA-BLCA(N=405)	-0.0438819	0.378426	0.0119647	0.810292	-0.0168939	0.734642
TCGA-ACC(N=77)	-0.115835	0.31576	-0.239794	0.0356834	-0.195881	0.0877633
TCGA-KICH(N=65)	0.198832	0.112324	0.0756455	0.54924	0.134368	0.285908
TCGA-CHOL(N=36)	-0.0915682	0.595323	-0.0756955	0.660825	-0.0862898	0.616792
TCGA-DLBC(N=46)	-0.0211708	0.888936	-0.0297394	0.844458	-0.0305101	0.840478
