# Supplementary material for: Pan-cancer landscape of CENPO and its underlying mechanism in LUAD
Source: Respir Res. 2023 Apr 15;24:113. doi: 10.1186/s12931-023-02408-3 (PMC10105544; doi:10.1186/s12931-023-02408-3)
Supplement: Supplementary file 5 — Additional file 5: Table S3. The relationship between CENPO expression and 22 immune cells in multiple types of cancers. [file 12931_2023_2408_MOESM5_ESM.xlsx]

## Sheet: Sheet1
Table S3. The relationship between CENPO expression and 22 immune cells in multiple types of cancers.
cell types	Method	TCGA-GBM(N=152)	TCGA-GBMLGG(N=656)	TCGA-LGG(N=504)	TCGA-CESC(N=291)	TCGA-LUAD(N=500)	TCGA-COAD(N=282)	TCGA-COADREAD(N=373)	TCGA-LAML(N=149)	TCGA-BRCA(N=1077)	TCGA-ESCA(N=181)	TCGA-STES(N=569)	TCGA-SARC(N=258)	TCGA-KIRP(N=285)	TCGA-KIPAN(N=878)	TCGA-STAD(N=388)	TCGA-PRAD(N=495)	TCGA-UCEC(N=178)	TCGA-HNSC(N=517)	TCGA-KIRC(N=528)	TCGA-LUSC(N=491)	TCGA-THYM(N=118)	TCGA-LIHC(N=363)	TCGA-THCA(N=503)	TCGA-MESO(N=85)	TCGA-READ(N=91)	TCGA-SKCM-M(N=351)	TCGA-SKCM(N=452)	TCGA-PAAD(N=177)	TCGA-OV(N=417)	TCGA-TGCT(N=132)	TCGA-PCPG(N=177)	TCGA-SKCM-P(N=101)	TCGA-UVM(N=79)	TCGA-UCS(N=56)	TCGA-BLCA(N=405)	TCGA-ACC(N=77)	TCGA-KICH(N=65)	TCGA-CHOL(N=36)	TCGA-DLBC(N=46)
B_cells_naive	pearson.cor	-0.03151	0.0302466	0.0532169	0.0649905	-0.0200637	-0.0584613	-0.0483918	0.157882	-0.0375196	-0.150878	-0.152014	-0.00840697	0.145993	0.0269141	-0.121074	0.0362209	0.0175419	0.0879503	0.0207539	0.078944	-0.258091	-0.0415276	-0.0419868	-0.199385	-0.0156697	-0.0668184	-0.0350813	0.0297361	0.0979704	0.273461	-0.0481252	0.106985	-0.10794	-0.07802	-0.101494	-0.0853458	-0.173119	-0.00622209	-0.0802568
B_cells_naive	pearson.p	0.699963	0.439291	0.233028	0.269137	0.654471	0.327971	0.351331	0.0544752	0.218582	0.0426202	0.000273382	0.8931	0.0136231	0.425741	0.0170343	0.421345	0.816221	0.0456283	0.634209	0.0805416	0.00477689	0.430218	0.347352	0.0673339	0.882799	0.211748	0.456875	0.694396	0.0458246	0.00151055	0.524714	0.286936	0.343706	0.567625	0.0412014	0.460511	0.167868	0.97127	0.59597
B_cells_memory	pearson.cor	-0.00697186	-0.148972	-0.117402	-0.0286535	-0.162804	-0.0791263	-0.13293	0.00248719	0.00466462	-0.157125	-0.22916	-0.130106	-0.059813	-0.0721724	-0.228925	-0.0351772	-0.0225252	0.0248553	-0.122765	-0.0954411	-0.198838	0.148142	0.0512909	0.0290276	-0.239669	-0.116301	-0.109984	-0.0291156	-0.0669679	-0.22749	0.00424861	-0.0921045	-0.163224	0.15139	-0.115041	-0.153064	0.117826	-0.416224	0.190659
B_cells_memory	pearson.p	0.932066	0.000128326	0.00833342	0.626409	0.000256476	0.185193	0.0101667	0.975984	0.878473	0.0346525	3.23868e-08	0.0367488	0.314308	0.0324934	5.22883e-06	0.434858	0.765364	0.572843	0.0047291	0.0344921	0.0308854	0.00467869	0.250874	0.792	0.0221291	0.0293671	0.0193394	0.700464	0.172787	0.00870851	0.955243	0.359632	0.150633	0.265373	0.0205745	0.183844	0.349906	0.0115715	0.204367
Plasma_cells	pearson.cor	0.0289025	-0.0219458	-0.0341774	0.133411	-0.108767	0.0541835	0.0682505	0.201875	-0.135114	-0.0688828	-0.0160414	-0.0621384	-0.0255357	-0.0196648	-0.0489595	-0.0840471	-0.179005	-0.0377824	-0.0734557	-0.156854	-0.314165	0.0306869	-0.16817	-0.38072	0.112029	-0.192713	-0.160071	0.0261582	-0.0511344	0.0304399	-0.112596	-0.0428215	-0.287317	-0.159943	-0.10588	0.0130025	0.0938614	0.103081	-0.169941
Plasma_cells	pearson.p	0.723739	0.574741	0.443915	0.0228332	0.0149647	0.36466	0.188427	0.0135523	8.61118e-06	0.356843	0.702587	0.320123	0.667729	0.560623	0.336122	0.0616912	0.0168141	0.391274	0.0917646	0.000485895	0.000531158	0.560039	0.000151071	0.000325065	0.2904	0.00028157	0.000635992	0.729639	0.298115	0.728981	0.135666	0.670699	0.0102464	0.238992	0.0331557	0.910637	0.457061	0.549668	0.25885
T_cells_CD8	pearson.cor	-0.0104356	0.0148813	0.0422687	-0.0594066	0.185018	0.124297	0.132107	-0.0475822	-0.0824362	-0.196744	-0.124363	-0.0347048	-0.0145751	0.100687	-0.0228648	-0.12589	-0.0732917	-0.0175715	0.0332597	0.0541517	0.23848	-0.0255097	-0.0348261	0.040805	0.175032	-0.231374	-0.223291	-0.148546	-0.0756064	-0.146434	0.044213	-0.19774	0.299151	-0.235751	0.0645704	-0.29731	0.2154	0.101382	-0.191731
T_cells_CD8	pearson.p	0.898465	0.703618	0.34364	0.312528	3.14425e-05	0.0369667	0.0106475	0.564447	0.00679288	0.00794087	0.002963	0.578961	0.806466	0.00281906	0.653439	0.00503224	0.330925	0.690189	0.445672	0.231017	0.00930564	0.628083	0.435767	0.710796	0.0970246	1.19287e-05	1.62876e-06	0.0484681	0.123648	0.0938487	0.558995	0.0474628	0.00740288	0.0802639	0.194703	0.00864263	0.0848517	0.556303	0.201788
T_cells_CD4_naive	pearson.cor	-0.0153651	-0.110996	-0.0209089	0.0190211	NA	-0.0477069	-0.15454	-0.0807498	-0.00315234	0.0318249	0.018123	0.0136914	0.0651545	0.01983	-0.00317072	0.0357756	0.066801	0.0454282	-0.0256033	0.0574099	0.412852	-0.0521456	0.0439842	NA	-0.283736	0.0274722	0.00842332	-0.0978666	0.0403612	0.133073	NA	-0.112845	0.0455642	0.175084	-0.0694891	0.0805006	0.0931867	-0.135572	NA
T_cells_CD4_naive	pearson.p	0.85097	0.00442352	0.639577	0.746613	NA	0.424852	0.00276566	0.327592	0.917699	0.670617	0.666188	0.826761	0.272962	0.557334	0.95036	0.427079	0.375646	0.302558	0.55719	0.204112	3.38495e-06	0.321805	0.324878	NA	0.00642024	0.607984	0.85826	0.195004	0.411607	0.128228	NA	0.261201	0.690088	0.196824	0.162773	0.48645	0.460316	0.430479	NA
T_cells_CD4_memory_resting	pearson.cor	-0.0411178	0.159229	0.180335	-0.0602737	-0.141227	-0.175517	-0.111555	0.0569621	0.0126087	0.0377815	-0.0397419	-0.160402	0.0870655	0.0407734	-0.0942385	0.115878	-0.0591599	0.158156	-0.0260686	-0.125966	-0.492146	-0.0392305	0.0547301	-0.000772544	0.0572563	0.0415357	0.0374657	-0.0590761	-0.0915635	0.156905	0.0999956	0.00889798	-0.130039	0.07333	-0.0649803	0.0968382	0.00524374	0.0776963	0.350983
T_cells_CD4_memory_resting	pearson.p	0.614991	4.19198e-05	4.66348e-05	0.305505	0.00154602	0.00310308	0.0312421	0.490184	0.679369	0.613589	0.344005	0.00986111	0.142605	0.227455	0.0636788	0.0098716	0.432795	0.000306034	0.550045	0.00518582	1.51268e-08	0.456181	0.22045	0.994401	0.58983	0.437909	0.426843	0.434761	0.0620641	0.0723825	0.18542	0.929629	0.253353	0.5912	0.191879	0.402129	0.966932	0.652416	0.0167748
T_cells_CD4_memory_activated	pearson.cor	-0.0664459	0.00188561	-0.0163319	0.00283973	0.223676	0.00974862	0.0448638	0.0431015	0.232198	-0.0290434	0.147256	0.0718451	0.112116	0.231363	0.242903	-0.0257553	0.059423	0.0372671	0.261673	-0.0779439	0.00209154	0.123945	-0.0375295	0.0749403	0.147666	-0.00716977	-0.0108399	0.155889	-0.040858	-0.210184	-0.0181835	-0.0297786	0.00255184	-0.378674	0.197554	0.161921	0.49595	0.438111	0.401435
T_cells_CD4_memory_activated	pearson.p	0.416025	0.961554	0.714541	0.96153	4.34505e-07	0.870531	0.387593	0.601717	1.19038e-14	0.697932	0.000424896	0.250191	0.0587072	3.91697e-12	1.28597e-06	0.567548	0.430748	0.397771	1.02653e-09	0.0844654	0.982067	0.018155	0.400964	0.495463	0.16246	0.893523	0.818225	0.0382697	0.405871	0.0155654	0.810159	0.767527	0.982193	0.00400415	6.25632e-05	0.159452	2.6568e-05	0.00752893	0.00569059
T_cells_follicular_helper	pearson.cor	0.189382	0.147303	0.175875	-0.0250682	0.0816176	0.199271	0.165972	0.0348844	-0.0134504	0.0272734	0.123671	0.0172215	0.0349202	-0.00230925	0.162996	-0.10867	-0.0796578	-0.0438796	0.0164581	0.0911067	0.547554	0.166471	0.0062562	-0.0385098	0.0584839	-0.0703357	-0.0531936	0.0367402	0.0895954	-0.136523	-0.0128555	0.0108931	0.231332	-0.0568922	-0.0833525	0.127932	-0.137737	-0.213261	-0.14672
T_cells_follicular_helper	pearson.p	0.0194513	0.000152918	7.20028e-05	0.670212	0.0682277	0.000764646	0.00129526	0.672762	0.659271	0.715521	0.00312784	0.783089	0.557131	0.945524	0.00127356	0.0155714	0.29053	0.319356	0.705945	0.0436076	1.39465e-10	0.00145761	0.888688	0.726402	0.581867	0.188622	0.259076	0.627324	0.0679152	0.118539	0.865147	0.913904	0.040241	0.677061	0.0939013	0.267518	0.273889	0.211725	0.330555
T_cells_regulatory_(Tregs)	pearson.cor	0.120251	0.204893	0.104849	-0.0447175	-0.0779661	-0.123274	-0.104426	-0.125275	-0.0317864	-0.0778693	-0.171967	-0.0926899	-0.0233335	-0.0318843	-0.133714	-0.0930969	-0.259531	0.0348702	-0.0308626	-0.0906225	0.353882	0.0997765	-0.163403	0.152195	-0.0464496	-0.19084	-0.177211	-0.0392321	-0.0838658	-0.0671503	0.164601	-0.136072	0.104509	-0.0737651	-0.145687	-0.0048839	0.213377	0.0207398	-0.403065
T_cells_regulatory_(Tregs)	pearson.p	0.140032	1.19612e-07	0.018548	0.447302	0.0815675	0.038562	0.0438472	0.127935	0.297315	0.297435	3.72691e-05	0.1376	0.694883	0.345344	0.00835922	0.038402	0.000468191	0.428835	0.479159	0.0447419	8.45174e-05	0.0575404	0.000232869	0.164376	0.661958	0.000323472	0.000152389	0.604144	0.0875625	0.444257	0.0285746	0.174842	0.359352	0.588994	0.00329786	0.966375	0.0878901	0.904436	0.00547992
T_cells_gamma_delta	pearson.cor	0.101835	0.146055	0.101515	0.0868271	-0.00988307	0.0348593	-0.0817689	0.0429103	-0.014453	0.0210269	-0.0890039	-0.0542602	-0.0314268	-0.111336	-0.121349	-0.0595309	0.0744142	-0.0846447	-0.133659	-0.0617735	NA	0.0368588	0.0153973	0.0658404	-0.210563	-0.0396776	-0.0560571	-0.202238	-0.0634073	-0.263242	NA	-0.143149	0.254276	0.141851	-0.0307182	-0.0957993	-0.0850236	NA	-0.0872971
T_cells_gamma_delta	pearson.p	0.21189	0.000174146	0.0226524	0.139521	0.825525	0.559917	0.114897	0.603331	0.635651	0.778741	0.0337858	0.385419	0.59726	0.000951194	0.0167828	0.186067	0.323552	0.0544281	0.00208546	0.171743	NA	0.483883	0.73048	0.549386	0.0451347	0.458693	0.234272	0.00694445	0.196819	0.00229121	NA	0.153266	0.0237385	0.297015	0.537613	0.407221	0.500691	NA	0.564016
NK_cells_resting	pearson.cor	0.0446362	0.153272	0.0920694	0.0777267	0.102116	-0.094729	-0.0664228	0.099477	0.00286871	0.0878354	0.188784	0.0467013	-0.0260599	-0.14571	0.187218	-0.0320404	0.137234	0.0184684	-0.133528	-0.0170745	0.101335	-0.0143362	0.00383938	0.146199	0.0150708	0.096427	0.0885803	0.0558806	0.052276	0.164619	0.0242079	0.0644231	-0.113069	0.0986675	0.132375	0.136	-0.0462116	-0.171619	0.340965
NK_cells_resting	pearson.p	0.585038	8.09766e-05	0.0388085	0.186097	0.0223927	0.11245	0.200564	0.227416	0.925081	0.239678	5.78413e-06	0.455125	0.661327	1.46055e-05	0.000208309	0.476939	0.0677469	0.675255	0.00210674	0.705871	0.274889	0.785458	0.93155	0.181838	0.887248	0.0711808	0.0598729	0.460057	0.287445	0.0592634	0.749097	0.52214	0.321125	0.469388	0.00764164	0.238251	0.714712	0.316911	0.0204026
NK_cells_activated	pearson.cor	-0.0953181	-0.0913555	0.00613878	-0.0799544	0.0175037	0.135556	0.103759	-0.14479	-0.122554	0.149402	-0.161637	-0.14422	-0.0797492	-0.057784	-0.229555	-0.056428	0.00357521	-0.0439827	0.00042691	0.0839594	-0.360237	-0.00714664	-0.0746915	-0.219848	0.0320523	-0.127908	-0.112472	-0.0617804	-0.0541732	-0.239385	-0.0678402	-0.0618786	-0.0476487	-0.05987	-0.0119876	-0.135773	-0.243684	-0.118408	-0.0950845
NK_cells_activated	pearson.p	0.242758	0.0192695	0.890656	0.173758	0.696208	0.0227992	0.045221	0.0781043	5.51894e-05	0.0447119	0.000107655	0.0204818	0.17942	0.0870457	4.91755e-06	0.210108	0.962224	0.318219	0.992192	0.063033	6.15205e-05	0.892063	0.0942629	0.0432083	0.762949	0.0165002	0.0167498	0.41399	0.270286	0.00570136	0.369615	0.538739	0.67668	0.661158	0.809936	0.239044	0.0504514	0.491576	0.529629
Monocytes	pearson.cor	-0.285591	-0.315445	-0.228923	-0.101916	-0.0885527	-0.0310226	-0.0198049	-0.132131	-0.0840544	0.0494903	-0.0799309	-0.128431	-0.0356867	-0.0972753	-0.129189	0.0427177	-0.057343	-0.0149816	-0.0874552	-0.0358729	-0.00352457	-0.166745	0.0684488	-0.0801779	0.00748134	0.0534311	0.0520685	-0.182505	-0.0541307	0.0587563	-0.0252043	0.0554983	-0.358933	-0.0322605	-0.0667034	0.0488129	-0.109682	-0.146349	0.339537
Monocytes	pearson.p	0.000361769	1.27212e-16	2.0394e-07	0.0826342	0.0478124	0.603922	0.703018	0.108201	0.00577744	0.508217	0.0567143	0.0392617	0.548503	0.00391277	0.010859	0.342906	0.447083	0.733977	0.0445737	0.427708	0.969784	0.00143109	0.125245	0.465736	0.94389	0.318195	0.2693	0.015044	0.270662	0.503358	0.739136	0.581474	0.00116061	0.813408	0.180335	0.673334	0.384433	0.394379	0.0209697
Macrophages_M0	pearson.cor	0.265233	0.301469	0.191282	0.162802	0.206859	-0.0886177	-0.0919998	-0.121554	0.160909	0.106653	0.1841	0.265227	-0.0523353	0.0058751	0.186348	0.0818109	0.203383	-0.0260977	0.0901605	0.1265	-0.273742	0.128706	-0.00244876	-0.0549729	-0.103382	0.188082	0.160909	0.11765	0.231851	-0.172038	0.0776762	0.0315617	0.0824617	0.167616	0.154474	0.417046	-0.0125546	-0.0162252	-0.224675
Macrophages_M0	pearson.p	0.000958726	2.99848e-15	1.53506e-05	0.0053721	3.09409e-06	0.137688	0.0759618	0.139744	1.1014e-07	0.153001	9.88605e-06	1.58129e-05	0.378728	0.861992	0.000223234	0.0689686	0.00647177	0.553807	0.038355	0.00499758	0.00270463	0.0141303	0.956311	0.617287	0.329467	0.000395892	0.000594942	0.118864	1.75376e-06	0.0485528	0.304116	0.754037	0.469996	0.216909	0.00182173	0.000161191	0.920933	0.925172	0.133318
Macrophages_M1	pearson.cor	-0.0487943	0.128962	0.173545	-0.0576612	0.256343	0.186345	0.182661	0.0127301	0.239483	0.00810997	0.140296	-0.0488885	0.136381	0.0994093	0.219605	0.211042	0.093111	0.0247531	0.0711676	0.102696	-0.461921	-0.13362	-0.0343876	0.172962	0.170554	-0.0224278	0.00223271	0.172035	0.0132816	0.0403187	0.0218855	0.0704423	0.274418	-0.0577267	0.084715	0.143539	-0.105684	0.299015	0.11925
Macrophages_M1	pearson.p	0.55053	0.000931021	8.99704e-05	0.326983	6.05955e-09	0.00167264	0.000391403	0.87754	1.63429e-15	0.913715	0.000791239	0.434261	0.0212771	0.003191	1.27024e-05	2.16942e-06	0.216388	0.574423	0.102363	0.0228578	1.40025e-07	0.0108197	0.441571	0.113427	0.106018	0.675407	0.962245	0.022041	0.787092	0.646229	0.772475	0.483931	0.0143896	0.67259	0.0886337	0.212982	0.402105	0.0764683	0.429903
Macrophages_M2	pearson.cor	-0.0654712	0.0464915	-0.00748164	-0.119432	-0.0159274	0.0455617	0.0075664	0.09099	-0.0118274	0.0269684	0.0454554	0.165465	-0.0633178	-0.0225551	0.0519204	-0.019925	0.0744247	-0.0053551	0.0260846	0.00818807	-0.586296	0.0284808	0.095748	0.274376	-0.0913522	0.14454	0.150111	0.0672853	-0.0587269	0.188041	0.011234	0.190542	-0.0246216	0.0218408	0.0596183	-0.183338	0.0127511	0.216002	0.00933099
Macrophages_M2	pearson.p	0.422912	0.234386	0.866939	0.041763	0.72238	0.445995	0.884203	0.269761	0.69823	0.718567	0.27905	0.00773927	0.28674	0.504475	0.30768	0.658326	0.323484	0.90332	0.5498	0.856386	3.04924e-12	0.588597	0.0317936	0.0110493	0.389128	0.00667677	0.00137082	0.373552	0.231999	0.030836	0.882024	0.0563125	0.829467	0.873059	0.231247	0.110482	0.9197	0.205773	0.950925
Dendritic_cells_resting	pearson.cor	-0.110846	-0.00698453	0.0258678	-0.0982143	-0.215375	-0.0599382	-0.0813334	0.0819553	-0.0678155	-0.0153536	-0.0288046	-0.177762	0.115461	0.0776035	-0.0863228	0.195776	-0.123392	-0.19704	0.0575472	-0.124255	0.382901	0.208778	-0.065676	0.259131	-0.128264	0.0395293	0.0260724	-0.0591742	-0.0428238	-0.310457	0.036746	0.0185076	0.0781105	-0.180587	-0.025455	-0.133198	0.0910498	-0.00329899	0.131427
Dendritic_cells_resting	pearson.p	0.173984	0.858289	0.562329	0.0944762	1.16766e-06	0.315878	0.11685	0.320399	0.026046	0.837461	0.492884	0.0041799	0.0515154	0.0214671	0.089499	1.14786e-05	0.100812	6.37035e-06	0.186737	0.00583389	1.87433e-05	6.11616e-05	0.141323	0.0166315	0.225645	0.460376	0.580355	0.433998	0.383639	0.000291316	0.62727	0.854249	0.493823	0.182897	0.609511	0.248153	0.47071	0.984765	0.383952
Dendritic_cells_activated	pearson.cor	-0.108926	0.0239736	0.053008	0.0881515	0.031403	0.0383768	0.0987525	-0.00990936	0.130436	0.187537	0.203678	-0.0170231	-0.0559777	-0.109475	0.0661725	-0.0250462	0.0317544	0.0252084	-0.0780364	0.0329696	-0.0464399	0.0432857	0.0189297	-0.173854	0.264753	0.00969197	-0.0275811	0.0298069	0.022886	-0.0816012	0.117611	-0.0696932	-0.0222351	0.0822791	0.101321	0.274732	-0.0665337	0.210466	0.0247294
Dendritic_cells_activated	pearson.p	0.181609	0.539915	0.23487	0.133562	0.483548	0.520984	0.0567168	0.904528	1.75495e-05	0.0114702	9.62025e-07	0.785528	0.346398	0.00115806	0.193372	0.578265	0.673918	0.567402	0.0731933	0.466067	0.617521	0.410938	0.671908	0.111551	0.0112096	0.856418	0.558635	0.693704	0.641616	0.352288	0.118986	0.488603	0.845781	0.546604	0.0415503	0.0156036	0.59848	0.217916	0.870415
Mast_cells_resting	pearson.cor	0.0992354	0.0730063	0.121218	-0.102599	-0.312024	-0.042475	-0.0258459	0.00102778	-0.20049	-0.192772	-0.298978	-0.318545	0.0759325	-0.0572856	-0.335828	-0.0201341	0.0939572	-0.103198	-0.0562326	-0.0381778	-0.370296	-0.192561	0.0643866	0.093094	0.0265944	-0.0112705	-0.025069	-0.0448438	0.04211	-0.221567	0.15433	-0.0371092	-0.109437	0.0149866	-0.1874	-0.412364	0.0216242	-0.178434	0.167336
Mast_cells_resting	pearson.p	0.223847	0.0616503	0.00643732	0.0805859	9.42807e-13	0.477438	0.618784	0.990075	3.14741e-11	0.00932371	3.25737e-13	1.7082e-07	0.201214	0.0898085	1.10622e-11	0.654971	0.212223	0.0189221	0.197021	0.398605	3.66996e-05	0.000223608	0.149318	0.396762	0.802408	0.83335	0.595015	0.553396	0.391625	0.0106734	0.0402688	0.712555	0.337015	0.912706	0.000148629	0.00019411	0.864242	0.297781	0.26633
Mast_cells_activated	pearson.cor	-0.132022	-0.225701	-0.193332	0.0456775	0.147984	-0.00998053	0.00337394	-0.025419	-0.0382591	0.143852	0.168063	0.0559562	-0.0226507	-0.00141017	0.186661	-0.0263611	-0.0314139	0.0452543	-0.0124704	0.00533219	-0.0444785	-0.0577712	-0.0908515	-0.222689	0.0358478	0.100944	0.0583823	-0.0595908	-0.091793	0.0759842	-0.26313	-0.0189534	0.125785	0.0079654	0.145789	-0.0088838	0.0553639	0.057388	0.0597812
Mast_cells_activated	pearson.p	0.104943	5.05548e-09	1.2378e-05	0.4376	0.000903283	0.867479	0.948219	0.758299	0.209633	0.0533608	5.60641e-05	0.370719	0.703385	0.966718	0.000217745	0.558469	0.677217	0.304415	0.77497	0.906184	0.63247	0.272288	0.0416771	0.0405123	0.735855	0.0588564	0.215403	0.430763	0.0614096	0.386522	0.000402452	0.850778	0.269342	0.953538	0.00327579	0.938877	0.661362	0.739549	0.6931
Eosinophils	pearson.cor	-0.0958693	-0.0818175	-0.0240561	0.0257094	0.0919975	-0.105648	-0.0666934	0.0564478	0.0711422	-0.0844327	-0.00818124	-0.0172363	-0.0117637	-0.117252	0.0171346	0.0257357	0.044251	-0.0658849	-0.0750856	-0.0852064	-0.226786	-0.0095277	0.18516	0.111439	0.0121588	0.0498809	0.0650868	-0.0581339	0.0446319	NA	-0.0213509	0.1311	-0.154386	-0.0531916	0.0623627	0.143077	-0.157559	0.0661587	0.0597812
Eosinophils	pearson.p	0.240032	0.036165	0.590027	0.66229	0.0397498	0.0765244	0.198733	0.494117	0.019545	0.258444	0.845607	0.782908	0.843258	0.00049886	0.736532	0.567843	0.557533	0.134636	0.0847657	0.0592049	0.0135277	0.856442	2.93374e-05	0.309931	0.90893	0.351458	0.167157	0.442136	0.363863	NA	0.777887	0.191286	0.174305	0.697019	0.210436	0.214473	0.210031	0.70145	0.6931
Neutrophils	pearson.cor	-0.0934699	0.13842	0.0691677	-0.00760051	0.0896777	0.0930863	0.0867386	-0.0881172	0.0176806	-0.0120179	0.0696496	0.0744228	0.00653219	0.10012	0.12268	0.0406086	-0.152003	-0.081108	0.094168	-0.116934	0.00831679	0.100065	0.0166982	0.104221	0.0722695	0.11316	0.0882842	-0.0270236	-0.0154048	0.0664689	0.057496	-0.0518512	-0.0227425	0.115467	0.0487116	0.227134	0.507822	0.120701	0.120174
Neutrophils	pearson.p	0.252055	0.000377041	0.120946	0.897279	0.0450407	0.118847	0.0943799	0.285237	0.562178	0.872432	0.0969618	0.233554	0.912574	0.00297906	0.0156123	0.367284	0.0428192	0.0653616	0.030503	0.00950395	0.928777	0.05682	0.708704	0.342504	0.496018	0.0340643	0.0607359	0.721059	0.754074	0.448903	0.447168	0.606582	0.842307	0.396759	0.328148	0.0469734	1.57477e-05	0.483167	0.426313
