# Supplementary material for: Pan-cancer landscape of CENPO and its underlying mechanism in LUAD
Source: Respir Res. 2023 Apr 15;24:113. doi: 10.1186/s12931-023-02408-3 (PMC10105544; doi:10.1186/s12931-023-02408-3)
Supplement: Supplementary file 6 — Additional file 6: Table S4. The correlation of CENPO expression with TMB, MSI, and MATH in multiple types of cancers. [file 12931_2023_2408_MOESM6_ESM.xlsx]

## Sheet: MATH
Table S4. The correlation of CENPO expression with MATH in multiple types of cancers.
cancer	MATH	Expression	SampleName
GBM(N=149)	27.534	3.9261	TCGA-19-1787-01
GBM(N=149)	38.5475	3.0056	TCGA-06-5412-01
GBM(N=149)	20.1015	3.5923	TCGA-12-5299-01
GBM(N=149)	24.2599	3.7529	TCGA-06-2565-01
GBM(N=149)	21.9474	3.3192	TCGA-06-2561-01
GBM(N=149)	25.905	2.2082	TCGA-06-0132-01
GBM(N=149)	73.4101	3.9232	TCGA-19-2629-01
GBM(N=149)	44.9359	2.9356	TCGA-06-0238-01
GBM(N=149)	28.3361	2.651	TCGA-06-0749-01
GBM(N=149)	31.2683	4.5547	TCGA-06-0174-01
GBM(N=149)	27.5418	2.2482	TCGA-06-5410-01
GBM(N=149)	21.9271	3.1195	TCGA-28-2513-01
GBM(N=149)	41.7031	3.4224	TCGA-76-4929-01
GBM(N=149)	37.0971	2.876	TCGA-06-0645-01
GBM(N=149)	21.6036	4.6236	TCGA-32-2634-01
GBM(N=149)	46.8398	2.7508	TCGA-06-0141-01
GBM(N=149)	21.8791	4.1571	TCGA-06-0125-01
GBM(N=149)	45.3716	1.8484	TCGA-26-1442-01
GBM(N=149)	28.8728	3.0706	TCGA-26-5136-01
GBM(N=149)	25.5772	3.6089	TCGA-14-1034-01
GBM(N=149)	35.0263	2.7336	TCGA-06-0184-01
GBM(N=149)	16.7769	3.3206	TCGA-12-3652-01
GBM(N=149)	28.5834	3.9956	TCGA-76-4927-01
GBM(N=149)	23.3605	3.6393	TCGA-14-0790-01
GBM(N=149)	33.4421	3.5047	TCGA-26-5132-01
GBM(N=149)	17.8446	4.0748	TCGA-76-4932-01
GBM(N=149)	31.0693	4.17	TCGA-32-1970-01
GBM(N=149)	23.8625	3.0757	TCGA-06-0219-01
GBM(N=149)	36.3741	3.9774	TCGA-14-0787-01
GBM(N=149)	15.8544	4.1136	TCGA-12-0618-01
GBM(N=149)	50.4119	3.9031	TCGA-27-2524-01
GBM(N=149)	26.1635	3.9783	TCGA-08-0386-01
GBM(N=149)	40.7912	3.7443	TCGA-06-0190-01
GBM(N=149)	31.9716	3.7432	TCGA-06-0745-01
GBM(N=149)	12.6382	3.83	TCGA-26-5135-01
GBM(N=149)	39.5488	3.3235	TCGA-41-3915-01
GBM(N=149)	18.6707	2.8916	TCGA-27-1831-01
GBM(N=149)	26.7258	4.5559	TCGA-28-1753-01
GBM(N=149)	22.901	4.748	TCGA-12-5295-01
GBM(N=149)	16.4082	4.4027	TCGA-28-5204-01
GBM(N=149)	58.8333	4.5946	TCGA-06-2569-01
GBM(N=149)	47.9337	3.4304	TCGA-27-1830-01
GBM(N=149)	51.3036	4.7377	TCGA-06-2559-01
GBM(N=149)	26.9564	1.5806	TCGA-06-0139-01
GBM(N=149)	17.3867	2.6624	TCGA-27-2526-01
GBM(N=149)	78.9435	3.8085	TCGA-06-5856-01
GBM(N=149)	24.1189	3.4264	TCGA-06-5418-01
GBM(N=149)	26.5101	3.8054	TCGA-06-5414-01
GBM(N=149)	36.4103	3.8501	TCGA-06-5417-01
GBM(N=149)	11.7878	1.9452	TCGA-26-5134-01
GBM(N=149)	30.4798	4.5644	TCGA-76-4925-01
GBM(N=149)	34.4103	3.66	TCGA-28-2510-01
GBM(N=149)	24.5409	4.1044	TCGA-06-5413-01
GBM(N=149)	37.6948	4.1368	TCGA-06-0646-01
GBM(N=149)	24.8363	4.701	TCGA-12-3650-01
GBM(N=149)	38.3388	3.9213	TCGA-12-0616-01
GBM(N=149)	12.951	4.6236	TCGA-28-5215-01
GBM(N=149)	29.7529	2.8799	TCGA-19-2620-01
GBM(N=149)	49.6818	3.6312	TCGA-16-0846-01
GBM(N=149)	65.4905	3.6054	TCGA-02-0047-01
GBM(N=149)	37.065	4.7033	TCGA-19-2624-01
GBM(N=149)	24.3988	3.0217	TCGA-32-1982-01
GBM(N=149)	20.2601	3.6289	TCGA-27-1835-01
GBM(N=149)	28.7873	3.1393	TCGA-06-0747-01
GBM(N=149)	25.7843	3.2297	TCGA-28-5220-01
GBM(N=149)	28.5867	3.1701	TCGA-14-0817-01
GBM(N=149)	54.2197	3.7709	TCGA-06-2570-01
GBM(N=149)	47.4993	3.8033	TCGA-41-4097-01
GBM(N=149)	20.4155	4.34242	TCGA-06-0211-01
GBM(N=149)	46.7173	4.3133	TCGA-02-2483-01
GBM(N=149)	28.5687	4.7154	TCGA-76-4931-01
GBM(N=149)	21.5564	4.215	TCGA-27-2523-01
GBM(N=149)	24.6393	3.9204	TCGA-27-1837-01
GBM(N=149)	22.5297	3.0927	TCGA-06-0744-01
GBM(N=149)	30.0387	2.7679	TCGA-06-0750-01
GBM(N=149)	27.1899	3.3717	TCGA-32-5222-01
GBM(N=149)	39.0082	3.3364	TCGA-27-2519-01
GBM(N=149)	26.3287	3.8085	TCGA-12-0821-01
GBM(N=149)	19.8465	4.2795	TCGA-19-2619-01
GBM(N=149)	33.6756	3.6497	TCGA-12-0619-01
GBM(N=149)	21.5008	2.6325	TCGA-28-5213-01
GBM(N=149)	17.4132	2.7721	TCGA-14-0789-01
GBM(N=149)	21.4909	4.3111	TCGA-28-5209-01
GBM(N=149)	69.5937	4.0567	TCGA-28-5218-01
GBM(N=149)	35.3038	4.0064	TCGA-28-2514-01
GBM(N=149)	27.7234	4.5142	TCGA-06-5859-01
GBM(N=149)	42.3121	3.7204	TCGA-28-2509-01
GBM(N=149)	21.3199	4.7198	TCGA-14-1825-01
GBM(N=149)	67.6492	3.3842	TCGA-19-4065-01
GBM(N=149)	30.8005	3.6172	TCGA-02-2485-01
GBM(N=149)	48.6835	3.6254	TCGA-12-1597-01
GBM(N=149)	22.7069	4.0375	TCGA-28-1747-01
GBM(N=149)	22.2114	2.5313	TCGA-28-2499-01
GBM(N=149)	55.1204	2.9618	TCGA-06-0649-01
GBM(N=149)	20.6096	4.2312	TCGA-06-2564-01
GBM(N=149)	30.3964	4.0584	TCGA-06-5408-01
GBM(N=149)	38.2646	3.1162	TCGA-27-1832-01
GBM(N=149)	30.2238	2.694	TCGA-14-1829-01
GBM(N=149)	22.2301	3.0234	TCGA-32-2615-01
GBM(N=149)	31.8275	4.0001	TCGA-06-0158-01
GBM(N=149)	22.5243	3.9506	TCGA-06-2558-01
GBM(N=149)	42.787	3.6405	TCGA-28-5216-01
GBM(N=149)	28.9725	3.4517	TCGA-28-5207-01
GBM(N=149)	15.381	3.2929	TCGA-41-2572-01
GBM(N=149)	22.0276	3.0757	TCGA-06-0130-01
GBM(N=149)	51.0812	3.9232	TCGA-06-5416-01
GBM(N=149)	22.0233	3.863	TCGA-06-0168-01
GBM(N=149)	29.4025	2.2421	TCGA-02-0055-01
GBM(N=149)	32.2762	3.9022	TCGA-06-5415-01
GBM(N=149)	18.4507	3.5362	TCGA-06-5411-01
GBM(N=149)	13.5699	3.5461	TCGA-26-5139-01
GBM(N=149)	36.433	3.0038	TCGA-76-4928-01
GBM(N=149)	38.3257	3.9496	TCGA-06-0644-01
GBM(N=149)	84.2582	4.178	TCGA-14-0871-01
GBM(N=149)	46.6835	3.2557	TCGA-32-2632-01
GBM(N=149)	34.2051	3.2885	TCGA-06-0882-01
GBM(N=149)	27.0474	2.8838	TCGA-19-2625-01
GBM(N=149)	24.953	3.1344	TCGA-32-1980-01
GBM(N=149)	57.2745	4.1011	TCGA-27-1834-01
GBM(N=149)	21.5307	3.0842	TCGA-41-2571-01
GBM(N=149)	22.356	2.5363	TCGA-14-0781-01
GBM(N=149)	22.5716	4.2266	TCGA-06-0157-01
GBM(N=149)	45.5498	4.4108	TCGA-12-3653-01
GBM(N=149)	14.7542	4.0807	TCGA-76-4926-01
GBM(N=149)	91.0001	4.2781	TCGA-26-5133-01
GBM(N=149)	21.4772	3.1442	TCGA-06-2562-01
GBM(N=149)	109.878	3.1908	TCGA-27-2521-01
GBM(N=149)	29.2942	4.382	TCGA-41-5651-01
GBM(N=149)	20.1729	2.376	TCGA-06-0210-01
GBM(N=149)	28.8247	4.613	TCGA-19-5960-01
GBM(N=149)	64.2949	4.1772	TCGA-06-0686-01
GBM(N=149)	17.5216	3.7982	TCGA-06-2563-01
GBM(N=149)	18.8105	2.183	TCGA-32-4213-01
GBM(N=149)	23.1067	3.928	TCGA-15-0742-01
GBM(N=149)	16.7327	3.5237	TCGA-06-0187-01
GBM(N=149)	46.3312	5.1879	TCGA-19-1390-01
GBM(N=149)	44.0367	3.6184	TCGA-06-2557-01
GBM(N=149)	37.3211	3.5035	TCGA-06-0878-01
GBM(N=149)	78.5036	4.5293	TCGA-06-0129-01
GBM(N=149)	42.7545	2.9857	TCGA-16-1045-01
GBM(N=149)	15.9543	4.546	TCGA-06-2567-01
GBM(N=149)	27.3914	3.5863	TCGA-32-2616-01
GBM(N=149)	12.5389	3.958	TCGA-28-5208-01
GBM(N=149)	21.1161	4.0091	TCGA-06-1804-01
GBM(N=149)	30.6947	3.0038	TCGA-14-2554-01
GBM(N=149)	23.1738	4.2706	TCGA-27-2528-01
GBM(N=149)	16.9272	4.3053	TCGA-06-5858-01
GBM(N=149)	74.6435	2.05	TCGA-14-1823-01
GBM(N=149)	38.4378	2.7763	TCGA-06-0743-01
GBMLGG(N=649)	27.534	3.9261	TCGA-19-1787-01
GBMLGG(N=649)	33.6436	2.8819	TCGA-S9-A7J2-01
GBMLGG(N=649)	34.1961	5.1065	TCGA-E1-A7YI-01
GBMLGG(N=649)	38.5475	3.0056	TCGA-06-5412-01
GBMLGG(N=649)	87.3954	3.3717	TCGA-DU-7302-01
GBMLGG(N=649)	20.1015	3.5923	TCGA-12-5299-01
GBMLGG(N=649)	19.5858	2.043	TCGA-P5-A5EX-01
GBMLGG(N=649)	32.4924	3.2826	TCGA-HT-8563-01
GBMLGG(N=649)	49.4142	3.0074	TCGA-FG-A60K-01
GBMLGG(N=649)	24.2599	3.7529	TCGA-06-2565-01
GBMLGG(N=649)	21.9474	3.3192	TCGA-06-2561-01
GBMLGG(N=649)	25.0697	3.7291	TCGA-CS-5397-01
GBMLGG(N=649)	77.5944	3.5337	TCGA-E1-5322-01
GBMLGG(N=649)	2.59638	2.233	TCGA-HT-8558-01
GBMLGG(N=649)	43.6791	2.3816	TCGA-S9-A6U8-01
GBMLGG(N=649)	53.6467	2.2051	TCGA-HT-7854-01
GBMLGG(N=649)	33.6497	2.7073	TCGA-HT-7467-01
GBMLGG(N=649)	38.1353	2.7826	TCGA-HT-7874-01
GBMLGG(N=649)	54.2795	2.9469	TCGA-S9-A6TV-01
GBMLGG(N=649)	18.5793	4.0348	TCGA-VM-A8CD-01
GBMLGG(N=649)	25.905	2.2082	TCGA-06-0132-01
GBMLGG(N=649)	39.4763	2.8034	TCGA-HT-7616-01
GBMLGG(N=649)	35.7127	4.6294	TCGA-KT-A7W1-01
GBMLGG(N=649)	88.8304	2.9167	TCGA-P5-A5F2-01
GBMLGG(N=649)	73.4101	3.9232	TCGA-19-2629-01
GBMLGG(N=649)	27.1647	3.2174	TCGA-HT-7607-01
GBMLGG(N=649)	44.9359	2.9356	TCGA-06-0238-01
GBMLGG(N=649)	30.5823	3.3379	TCGA-HT-7873-01
GBMLGG(N=649)	28.3361	2.651	TCGA-06-0749-01
GBMLGG(N=649)	54.5214	1.7316	TCGA-HT-7603-01
GBMLGG(N=649)	56.7804	3.1604	TCGA-DB-A64P-01
GBMLGG(N=649)	31.2683	4.5547	TCGA-06-0174-01
GBMLGG(N=649)	48.4027	2.9148	TCGA-HW-7486-01
GBMLGG(N=649)	50.8399	2.3816	TCGA-P5-A5F1-01
GBMLGG(N=649)	85.2203	1.6649	TCGA-DU-7011-01
GBMLGG(N=649)	53.1992	2.8602	TCGA-P5-A77X-01
GBMLGG(N=649)	97.0556	1.9786	TCGA-VM-A8CA-01
GBMLGG(N=649)	102.944	2.5036	TCGA-DU-7015-01
GBMLGG(N=649)	62.4131	2.7951	TCGA-TM-A7C5-01
GBMLGG(N=649)	50.297	3.002	TCGA-DU-8162-01
GBMLGG(N=649)	29.5962	2.6464	TCGA-TM-A84O-01
GBMLGG(N=649)	27.5418	2.2482	TCGA-06-5410-01
GBMLGG(N=649)	55.1108	2.5112	TCGA-S9-A7R3-01
GBMLGG(N=649)	47.6804	3.034	TCGA-TQ-A7RN-01
GBMLGG(N=649)	21.9271	3.1195	TCGA-28-2513-01
GBMLGG(N=649)	19.4583	2.676	TCGA-DU-A6S6-01
GBMLGG(N=649)	29.9175	2.4883	TCGA-P5-A735-01
GBMLGG(N=649)	36.0221	2.5238	TCGA-HT-7691-01
GBMLGG(N=649)	96.3573	2.3816	TCGA-FG-A6J1-01
GBMLGG(N=649)	12.1551	2.496	TCGA-S9-A7R7-01
GBMLGG(N=649)	41.7031	3.4224	TCGA-76-4929-01
GBMLGG(N=649)	27.5712	3.4752	TCGA-DU-6402-01
GBMLGG(N=649)	33.3163	0.6969	TCGA-HT-7684-01
GBMLGG(N=649)	35.1016	4.1384	TCGA-HT-8104-01
GBMLGG(N=649)	16.5203	2.8014	TCGA-FN-7833-01
GBMLGG(N=649)	66.1636	2.376	TCGA-HT-7473-01
GBMLGG(N=649)	37.0971	2.876	TCGA-06-0645-01
GBMLGG(N=649)	41.6981	3.7028	TCGA-TQ-A7RU-01
GBMLGG(N=649)	90.0629	2.6783	TCGA-DB-A4XF-01
GBMLGG(N=649)	36.4425	2.4465	TCGA-FG-A713-01
GBMLGG(N=649)	18.356	3.6916	TCGA-E1-A7YL-01
GBMLGG(N=649)	27.1814	3.4007	TCGA-CS-5396-01
GBMLGG(N=649)	47.4837	3.9232	TCGA-HW-8322-01
GBMLGG(N=649)	26.9564	2.1345	TCGA-S9-A6U9-01
GBMLGG(N=649)	55.4657	2.824	TCGA-HT-7676-01
GBMLGG(N=649)	52.4896	3.6816	TCGA-HT-7469-01
GBMLGG(N=649)	21.6036	4.6236	TCGA-32-2634-01
GBMLGG(N=649)	51.799	2.5683	TCGA-HT-7478-01
GBMLGG(N=649)	73.8041	2.0147	TCGA-DU-A5TW-01
GBMLGG(N=649)	50.2302	2.6185	TCGA-S9-A6TX-01
GBMLGG(N=649)	22.6577	3.6703	TCGA-RY-A83Z-01
GBMLGG(N=649)	46.8398	2.7508	TCGA-06-0141-01
GBMLGG(N=649)	21.8791	4.1571	TCGA-06-0125-01
GBMLGG(N=649)	82.4696	2.9262	TCGA-FG-A6IZ-01
GBMLGG(N=649)	27.0292	3.3521	TCGA-CS-4941-01
GBMLGG(N=649)	62.5987	1.8801	TCGA-DH-A7UT-01
GBMLGG(N=649)	55.8342	1.692	TCGA-DU-5871-01
GBMLGG(N=649)	70.3924	2.128	TCGA-HW-8321-01
GBMLGG(N=649)	53.5383	3.7356	TCGA-EZ-7264-01
GBMLGG(N=649)	71.0413	2.6348	TCGA-CS-6666-01
GBMLGG(N=649)	24.7341	3.7269	TCGA-HW-7491-01
GBMLGG(N=649)	102.62	3.3435	TCGA-S9-A6U1-01
GBMLGG(N=649)	72.0166	2.8117	TCGA-E1-5307-01
GBMLGG(N=649)	20.0033	3.7898	TCGA-DU-A76L-01
GBMLGG(N=649)	62.7768	2.8076	TCGA-HW-7495-01
GBMLGG(N=649)	68.7434	3.5299	TCGA-HT-7481-01
GBMLGG(N=649)	71.2115	3.1637	TCGA-DU-8163-01
GBMLGG(N=649)	45.3716	1.8484	TCGA-26-1442-01
GBMLGG(N=649)	47.792	3.8788	TCGA-HT-8110-01
GBMLGG(N=649)	42.2754	3.3675	TCGA-RY-A840-01
GBMLGG(N=649)	36.4634	2.5462	TCGA-VM-A8C9-01
GBMLGG(N=649)	30.059	3.3407	TCGA-HW-8319-01
GBMLGG(N=649)	89.9069	2.8219	TCGA-QH-A6CW-01
GBMLGG(N=649)	23.7216	3.3163	TCGA-DU-5870-01
GBMLGG(N=649)	71.4059	3.2267	TCGA-TM-A84S-01
GBMLGG(N=649)	28.8728	3.0706	TCGA-26-5136-01
GBMLGG(N=649)	25.5772	3.6089	TCGA-14-1034-01
GBMLGG(N=649)	35.0263	2.7336	TCGA-06-0184-01
GBMLGG(N=649)	16.7769	3.3206	TCGA-12-3652-01
GBMLGG(N=649)	69.7881	3.0376	TCGA-RY-A845-01
GBMLGG(N=649)	28.5834	3.9956	TCGA-76-4927-01
GBMLGG(N=649)	67.2134	3.0199	TCGA-FG-8182-01
GBMLGG(N=649)	23.3605	3.6393	TCGA-14-0790-01
GBMLGG(N=649)	33.4421	3.5047	TCGA-26-5132-01
GBMLGG(N=649)	27.5008	3.1062	TCGA-FG-6688-01
GBMLGG(N=649)	40.2743	3.3278	TCGA-TQ-A7RP-01
GBMLGG(N=649)	69.3094	2.3953	TCGA-HT-8113-01
GBMLGG(N=649)	17.8446	4.0748	TCGA-76-4932-01
GBMLGG(N=649)	71.1648	2.8381	TCGA-HT-7689-01
GBMLGG(N=649)	42.2187	2.6895	TCGA-FG-7638-01
GBMLGG(N=649)	12.8168	4.3385	TCGA-DU-7013-01
GBMLGG(N=649)	31.0693	4.17	TCGA-32-1970-01
GBMLGG(N=649)	71.6326	2.828	TCGA-E1-A7Z3-01
GBMLGG(N=649)	80.0473	2.6371	TCGA-HT-7476-01
GBMLGG(N=649)	78.7172	3.3661	TCGA-TQ-A7RG-01
GBMLGG(N=649)	60.6629	3.2677	TCGA-DU-A7T6-01
GBMLGG(N=649)	46.2316	3.5682	TCGA-DB-A4XC-01
GBMLGG(N=649)	30.4473	3.3619	TCGA-FG-A4MW-01
GBMLGG(N=649)	23.8625	3.0757	TCGA-06-0219-01
GBMLGG(N=649)	92.3384	3.3321	TCGA-DH-5142-01
GBMLGG(N=649)	36.3741	3.9774	TCGA-14-0787-01
GBMLGG(N=649)	27.1214	3.1294	TCGA-S9-A6U2-01
GBMLGG(N=649)	15.8544	4.1136	TCGA-12-0618-01
GBMLGG(N=649)	50.4119	3.9031	TCGA-27-2524-01
GBMLGG(N=649)	87.2866	2.824	TCGA-TQ-A7RH-01
GBMLGG(N=649)	26.1635	3.9783	TCGA-08-0386-01
GBMLGG(N=649)	74.2707	2.108	TCGA-DB-A75M-01
GBMLGG(N=649)	102.973	2.6738	TCGA-HT-8012-01
GBMLGG(N=649)	33.1135	2.9167	TCGA-S9-A7QW-01
GBMLGG(N=649)	66.1645	1.614	TCGA-P5-A733-01
GBMLGG(N=649)	90.2218	2.1213	TCGA-E1-A7Z4-01
GBMLGG(N=649)	28.5177	1.6045	TCGA-DU-A5TR-01
GBMLGG(N=649)	70.0138	2.2299	TCGA-FG-8185-01
GBMLGG(N=649)	89.6132	2.0946	TCGA-HW-8320-01
GBMLGG(N=649)	29.652	1.5902	TCGA-CS-6667-01
GBMLGG(N=649)	52.9124	2.5731	TCGA-DU-5849-01
GBMLGG(N=649)	80.484	2.9637	TCGA-DB-5279-01
GBMLGG(N=649)	40.7912	3.7443	TCGA-06-0190-01
GBMLGG(N=649)	49.9913	3.2112	TCGA-CS-6670-01
GBMLGG(N=649)	50.0727	2.5061	TCGA-DB-A64V-01
GBMLGG(N=649)	31.9716	3.7432	TCGA-06-0745-01
GBMLGG(N=649)	26.2909	3.1426	TCGA-DU-5854-01
GBMLGG(N=649)	77.8135	4.2914	TCGA-DH-A7UR-01
GBMLGG(N=649)	97.3173	3.2511	TCGA-S9-A6WL-01
GBMLGG(N=649)	33.2078	2.2723	TCGA-HT-7880-01
GBMLGG(N=649)	12.6382	3.83	TCGA-26-5135-01
GBMLGG(N=649)	77.1726	3.0127	TCGA-E1-5318-01
GBMLGG(N=649)	31.9776	4.1587	TCGA-DU-6393-01
GBMLGG(N=649)	39.5488	3.3235	TCGA-41-3915-01
GBMLGG(N=649)	81.8675	2.96	TCGA-DU-5853-01
GBMLGG(N=649)	51.9928	4.4602	TCGA-TM-A84J-01
GBMLGG(N=649)	34.2582	3.5237	TCGA-FG-5962-01
GBMLGG(N=649)	18.6707	2.8916	TCGA-27-1831-01
GBMLGG(N=649)	34.1361	2.93	TCGA-F6-A8O4-01
GBMLGG(N=649)	26.7258	4.5559	TCGA-28-1753-01
GBMLGG(N=649)	99.7225	2.6441	TCGA-S9-A7R1-01
GBMLGG(N=649)	22.901	4.748	TCGA-12-5295-01
GBMLGG(N=649)	42.9174	3.9608	TCGA-TM-A84M-01
GBMLGG(N=649)	60.6629	2.3677	TCGA-HT-8107-01
GBMLGG(N=649)	39.6573	3.154	TCGA-P5-A5ET-01
GBMLGG(N=649)	45.2938	1.9712	TCGA-P5-A72W-01
GBMLGG(N=649)	58.3741	2.8096	TCGA-FG-A70Y-01
GBMLGG(N=649)	18.3972	2.9432	TCGA-TM-A84R-01
GBMLGG(N=649)	41.2453	2.0465	TCGA-HW-A5KM-01
GBMLGG(N=649)	55.7593	4.2533	TCGA-HT-7477-01
GBMLGG(N=649)	30.4757	3.6463	TCGA-FG-A87Q-01
GBMLGG(N=649)	18.5258	3.7815	TCGA-FG-A70Z-01
GBMLGG(N=649)	17.3116	3.7269	TCGA-FG-A4MU-01
GBMLGG(N=649)	48.6968	3.5098	TCGA-DB-A4XB-01
GBMLGG(N=649)	21.5928	2.3048	TCGA-WY-A85D-01
GBMLGG(N=649)	92.9443	2.9507	TCGA-FG-7641-01
GBMLGG(N=649)	13.3971	1.674	TCGA-DU-5872-01
GBMLGG(N=649)	102.121	2.1345	TCGA-FG-6689-01
GBMLGG(N=649)	76.3232	2.5238	TCGA-DB-5277-01
GBMLGG(N=649)	16.4082	4.4027	TCGA-28-5204-01
GBMLGG(N=649)	33.3006	3.1377	TCGA-HT-A615-01
GBMLGG(N=649)	62.8097	2.5585	TCGA-DU-7301-01
GBMLGG(N=649)	54.1883	2.4465	TCGA-P5-A5EW-01
GBMLGG(N=649)	58.8333	4.5946	TCGA-06-2569-01
GBMLGG(N=649)	38.2479	2.1702	TCGA-HT-A5RB-01
GBMLGG(N=649)	29.8208	2.5288	TCGA-E1-A7YN-01
GBMLGG(N=649)	47.9337	3.4304	TCGA-27-1830-01
GBMLGG(N=649)	20.7564	3.3278	TCGA-QH-A6XC-01
GBMLGG(N=649)	51.3036	4.7377	TCGA-06-2559-01
GBMLGG(N=649)	14.8334	3.0199	TCGA-S9-A6WN-01
GBMLGG(N=649)	26.9564	1.5806	TCGA-06-0139-01
GBMLGG(N=649)	82.3341	2.1766	TCGA-DB-A64L-01
GBMLGG(N=649)	84.3738	3.981	TCGA-TM-A84I-01
GBMLGG(N=649)	103.067	3.6018	TCGA-QH-A6CZ-01
GBMLGG(N=649)	26.2699	1.5465	TCGA-WY-A858-01
GBMLGG(N=649)	45.8831	3.2826	TCGA-VM-A8CB-01
GBMLGG(N=649)	17.3867	2.6624	TCGA-27-2526-01
GBMLGG(N=649)	36.053	1.4704	TCGA-VM-A8CF-01
GBMLGG(N=649)	78.9435	3.8085	TCGA-06-5856-01
GBMLGG(N=649)	78.8552	2.9875	TCGA-HT-7608-01
GBMLGG(N=649)	47.9919	2.828	TCGA-CS-4938-01
GBMLGG(N=649)	46.9538	2.4571	TCGA-QH-A6X5-01
GBMLGG(N=649)	71.1029	2.5972	TCGA-DU-8166-01
GBMLGG(N=649)	52.1542	2.9262	TCGA-HT-8018-01
GBMLGG(N=649)	16.7054	3.3435	TCGA-DU-7292-01
GBMLGG(N=649)	44.3608	1.4494	TCGA-S9-A6TU-01
GBMLGG(N=649)	71.8134	1.9895	TCGA-DB-A75P-01
GBMLGG(N=649)	24.1189	3.4264	TCGA-06-5418-01
GBMLGG(N=649)	97.5728	3.4556	TCGA-FG-6691-01
GBMLGG(N=649)	56.6719	3.2988	TCGA-DU-6399-01
GBMLGG(N=649)	65.3785	2.694	TCGA-S9-A7IQ-01
GBMLGG(N=649)	26.5101	3.8054	TCGA-06-5414-01
GBMLGG(N=649)	35.3453	2.1862	TCGA-S9-A6WI-01
GBMLGG(N=649)	39.8624	2.2783	TCGA-DB-A64S-01
GBMLGG(N=649)	18.4326	3.5994	TCGA-FG-6692-01
GBMLGG(N=649)	85.5346	2.6441	TCGA-HW-7489-01
GBMLGG(N=649)	126.043	3.1572	TCGA-R8-A6YH-01
GBMLGG(N=649)	36.4103	3.8501	TCGA-06-5417-01
GBMLGG(N=649)	63.9028	2.1541	TCGA-HT-A618-01
GBMLGG(N=649)	11.7878	1.9452	TCGA-26-5134-01
GBMLGG(N=649)	44.7133	1.8119	TCGA-QH-A65S-01
GBMLGG(N=649)	79.9683	2.167	TCGA-DU-7019-01
GBMLGG(N=649)	30.4798	4.5644	TCGA-76-4925-01
GBMLGG(N=649)	17.8305	4.3263	TCGA-DU-A7TJ-01
GBMLGG(N=649)	41.4701	2.4386	TCGA-TM-A84H-01
GBMLGG(N=649)	34.4103	3.66	TCGA-28-2510-01
GBMLGG(N=649)	37.0736	2.9893	TCGA-S9-A7R8-01
GBMLGG(N=649)	76.1335	2.1213	TCGA-S9-A7R4-01
GBMLGG(N=649)	83.7284	3.4556	TCGA-S9-A7J3-01
GBMLGG(N=649)	26.894	2.6348	TCGA-TM-A84L-01
GBMLGG(N=649)	31.0524	2.2872	TCGA-E1-A7YH-01
GBMLGG(N=649)	24.5409	4.1044	TCGA-06-5413-01
GBMLGG(N=649)	37.6948	4.1368	TCGA-06-0646-01
GBMLGG(N=649)	61.7768	3.2915	TCGA-P5-A5EV-01
GBMLGG(N=649)	29.7819	4.2227	TCGA-DU-A7TD-01
GBMLGG(N=649)	52.7207	1.7828	TCGA-HW-A5KL-01
GBMLGG(N=649)	27.496	3.3787	TCGA-RY-A83X-01
GBMLGG(N=649)	51.185	3.492	TCGA-HT-7687-01
GBMLGG(N=649)	23.184	2.6138	TCGA-WY-A85A-01
GBMLGG(N=649)	24.8363	4.701	TCGA-12-3650-01
GBMLGG(N=649)	45.8566	2.8158	TCGA-DB-5281-01
GBMLGG(N=649)	40.9257	2.1476	TCGA-E1-A7YK-01
GBMLGG(N=649)	86.3922	1.9188	TCGA-DU-A5TU-01
GBMLGG(N=649)	58.6714	2.59	TCGA-DU-A7TA-01
GBMLGG(N=649)	19.6226	3.8095	TCGA-CS-5395-01
GBMLGG(N=649)	45.9162	2.2113	TCGA-TQ-A7RR-01
GBMLGG(N=649)	80.7904	2.5948	TCGA-HT-A5R5-01
GBMLGG(N=649)	38.3388	3.9213	TCGA-12-0616-01
GBMLGG(N=649)	21.9774	2.2603	TCGA-QH-A65V-01
GBMLGG(N=649)	83.947	3.5923	TCGA-S9-A6WP-01
GBMLGG(N=649)	12.951	4.6236	TCGA-28-5215-01
GBMLGG(N=649)	29.7529	2.8799	TCGA-19-2620-01
GBMLGG(N=649)	81.9505	2.7292	TCGA-S9-A6U5-01
GBMLGG(N=649)	76.704	3.3563	TCGA-E1-A7YO-01
GBMLGG(N=649)	31.0926	3.6509	TCGA-QH-A6X8-01
GBMLGG(N=649)	36.0931	2.9692	TCGA-HT-7610-01
GBMLGG(N=649)	98.5292	3.2065	TCGA-HT-7875-01
GBMLGG(N=649)	49.6818	3.6312	TCGA-16-0846-01
GBMLGG(N=649)	76.2583	2.6783	TCGA-R8-A6MK-01
GBMLGG(N=649)	59.7991	2.9525	TCGA-P5-A5F0-01
GBMLGG(N=649)	55.7673	2.872	TCGA-R8-A73M-01
GBMLGG(N=649)	65.4905	3.6054	TCGA-02-0047-01
GBMLGG(N=649)	109.604	1.9527	TCGA-S9-A6TS-01
GBMLGG(N=649)	45.7053	2.3222	TCGA-S9-A6TW-01
GBMLGG(N=649)	49.8123	2.7314	TCGA-E1-5303-01
GBMLGG(N=649)	25.6787	4.2297	TCGA-HT-7606-01
GBMLGG(N=649)	32.3641	3.2018	TCGA-DU-6408-01
GBMLGG(N=649)	72.7536	3.1507	TCGA-FG-5964-01
GBMLGG(N=649)	36.0837	3.186	TCGA-DB-A64Q-01
GBMLGG(N=649)	38.4583	2.8034	TCGA-S9-A7IZ-01
GBMLGG(N=649)	87.3472	3.0757	TCGA-S9-A6WH-01
GBMLGG(N=649)	72.3561	2.3788	TCGA-HT-7602-01
GBMLGG(N=649)	37.065	4.7033	TCGA-19-2624-01
GBMLGG(N=649)	43.0895	3.002	TCGA-DU-A6S8-01
GBMLGG(N=649)	92.4241	2.5972	TCGA-HT-7858-01
GBMLGG(N=649)	24.3988	3.0217	TCGA-32-1982-01
GBMLGG(N=649)	20.2601	3.6289	TCGA-27-1835-01
GBMLGG(N=649)	27.3776	3.6916	TCGA-HT-7860-01
GBMLGG(N=649)	38.5954	3.6657	TCGA-DU-7006-01
GBMLGG(N=649)	82.7644	2.685	TCGA-TQ-A7RS-01
GBMLGG(N=649)	39.183	3.0533	TCGA-DU-7009-01
GBMLGG(N=649)	28.7873	3.1393	TCGA-06-0747-01
GBMLGG(N=649)	52.1317	3.66	TCGA-DU-7010-01
GBMLGG(N=649)	56.8435	2.6783	TCGA-QH-A6X3-01
GBMLGG(N=649)	45.4896	3.2781	TCGA-DU-8164-01
GBMLGG(N=649)	45.1469	3.5449	TCGA-DU-7018-01
GBMLGG(N=649)	12.0804	3.0376	TCGA-RY-A843-01
GBMLGG(N=649)	103.242	2.4412	TCGA-HT-7693-01
GBMLGG(N=649)	38.1807	3.2297	TCGA-FG-A6J3-01
GBMLGG(N=649)	25.7843	3.2297	TCGA-28-5220-01
GBMLGG(N=649)	66.8897	2.5238	TCGA-HT-8106-01
GBMLGG(N=649)	25.8963	3.0654	TCGA-HT-7472-01
GBMLGG(N=649)	28.5867	3.1701	TCGA-14-0817-01
GBMLGG(N=649)	77.9448	1.6649	TCGA-HT-7855-01
GBMLGG(N=649)	54.2197	3.7709	TCGA-06-2570-01
GBMLGG(N=649)	46.0268	3.6136	TCGA-DB-A4XG-01
GBMLGG(N=649)	18.5935	3.6486	TCGA-HT-A5RC-01
GBMLGG(N=649)	52.5477	2.3508	TCGA-VM-A8C8-01
GBMLGG(N=649)	32.2603	2.4198	TCGA-HT-7681-01
GBMLGG(N=649)	47.4993	3.8033	TCGA-41-4097-01
GBMLGG(N=649)	33.6436	2.4649	TCGA-DU-A6S2-01
GBMLGG(N=649)	76.769	2.8034	TCGA-DU-7309-01
GBMLGG(N=649)	102.21	2.108	TCGA-DB-A4XH-01
GBMLGG(N=649)	28.0492	3.3307	TCGA-HT-7485-01
GBMLGG(N=649)	31.3127	2.3077	TCGA-VW-A7QS-01
GBMLGG(N=649)	20.4155	4.34242	TCGA-06-0211-01
GBMLGG(N=649)	38.0668	2.2753	TCGA-VV-A86M-01
GBMLGG(N=649)	48.2746	4.6212	TCGA-E1-A7YV-01
GBMLGG(N=649)	33.8833	3.5706	TCGA-HT-7468-01
GBMLGG(N=649)	46.7173	4.3133	TCGA-02-2483-01
GBMLGG(N=649)	92.2545	3.5237	TCGA-HT-7677-01
GBMLGG(N=649)	28.5687	4.7154	TCGA-76-4931-01
GBMLGG(N=649)	34.3601	2.5388	TCGA-DU-A5TY-01
GBMLGG(N=649)	49.8245	2.8622	TCGA-HT-8109-01
GBMLGG(N=649)	34.9827	2.118	TCGA-HT-7479-01
GBMLGG(N=649)	69.3474	3.0825	TCGA-DB-5275-01
GBMLGG(N=649)	33.2389	2.578	TCGA-TM-A7C4-01
GBMLGG(N=649)	21.5564	4.215	TCGA-27-2523-01
GBMLGG(N=649)	24.6393	3.9204	TCGA-27-1837-01
GBMLGG(N=649)	64.9037	3.5875	TCGA-DH-A7UU-01
GBMLGG(N=649)	22.5297	3.0927	TCGA-06-0744-01
GBMLGG(N=649)	31.2814	2.3788	TCGA-HT-A4DV-01
GBMLGG(N=649)	47.1523	2.9128	TCGA-FG-8186-01
GBMLGG(N=649)	32.0083	3.186	TCGA-FG-A4MT-01
GBMLGG(N=649)	27.1325	3.3221	TCGA-E1-5305-01
GBMLGG(N=649)	28.5343	2.4306	TCGA-CS-5393-01
GBMLGG(N=649)	47.1621	2.6371	TCGA-DU-6395-01
GBMLGG(N=649)	94.0175	1.6187	TCGA-DB-A64X-01
GBMLGG(N=649)	49.0549	4.7367	TCGA-S9-A7IS-01
GBMLGG(N=649)	42.9925	3.0163	TCGA-HT-7856-01
GBMLGG(N=649)	30.0387	2.7679	TCGA-06-0750-01
GBMLGG(N=649)	27.1899	3.3717	TCGA-32-5222-01
GBMLGG(N=649)	56.3002	2.5437	TCGA-QH-A6XA-01
GBMLGG(N=649)	43.787	2.2144	TCGA-P5-A77W-01
GBMLGG(N=649)	39.0082	3.3364	TCGA-27-2519-01
GBMLGG(N=649)	30.2434	3.2959	TCGA-CS-4942-01
GBMLGG(N=649)	29.1451	3.4411	TCGA-CS-6186-01
GBMLGG(N=649)	77.6415	3.4358	TCGA-DU-7008-01
GBMLGG(N=649)	68.2228	2.8701	TCGA-HT-7688-01
GBMLGG(N=649)	28.0306	2.9205	TCGA-DU-A7T8-01
GBMLGG(N=649)	44.4163	2.2663	TCGA-DU-A6S3-01
GBMLGG(N=649)	64.7143	2.7117	TCGA-DB-A64U-01
GBMLGG(N=649)	22.6756	5.0756	TCGA-HT-A61C-01
GBMLGG(N=649)	26.3287	3.8085	TCGA-12-0821-01
GBMLGG(N=649)	35.9061	2.876	TCGA-TQ-A7RF-01
GBMLGG(N=649)	19.8465	4.2795	TCGA-19-2619-01
GBMLGG(N=649)	13.6994	3.4752	TCGA-F6-A8O3-01
GBMLGG(N=649)	32.1792	3.1829	TCGA-R8-A6ML-01
GBMLGG(N=649)	40.625	2.8219	TCGA-DU-A5TT-01
GBMLGG(N=649)	17.0821	2.6962	TCGA-QH-A870-01
GBMLGG(N=649)	68.1875	2.376	TCGA-DB-A75O-01
GBMLGG(N=649)	36.3992	3.034	TCGA-HT-8111-01
GBMLGG(N=649)	62.9777	3.1491	TCGA-S9-A7QZ-01
GBMLGG(N=649)	33.6756	3.6497	TCGA-12-0619-01
GBMLGG(N=649)	56.9036	2.7636	TCGA-DB-5273-01
GBMLGG(N=649)	55.6654	2.8381	TCGA-HT-7470-01
GBMLGG(N=649)	56.1251	2.4386	TCGA-FG-A4MY-01
GBMLGG(N=649)	33.3587	2.7401	TCGA-HT-8108-01
GBMLGG(N=649)	99.6673	3.741	TCGA-DB-A4XE-01
GBMLGG(N=649)	62.507	4.1359	TCGA-HT-A4DS-01
GBMLGG(N=649)	49.1599	3.208	TCGA-DU-8158-01
GBMLGG(N=649)	71.4371	2.4386	TCGA-HT-7474-01
GBMLGG(N=649)	64.9224	2.9338	TCGA-DH-5143-01
GBMLGG(N=649)	111.18	2.6418	TCGA-TQ-A7RJ-01
GBMLGG(N=649)	89.3921	2.0979	TCGA-S9-A7QY-01
GBMLGG(N=649)	56.7415	2.7993	TCGA-DB-A4XA-01
GBMLGG(N=649)	21.5008	2.6325	TCGA-28-5213-01
GBMLGG(N=649)	17.6994	2.3423	TCGA-P5-A731-01
GBMLGG(N=649)	30.6596	3.3633	TCGA-E1-A7YE-01
GBMLGG(N=649)	81.3896	3.0893	TCGA-FG-A710-01
GBMLGG(N=649)	19.1629	2.7636	TCGA-HT-8010-01
GBMLGG(N=649)	41.218	2.7572	TCGA-DU-7299-01
GBMLGG(N=649)	70.1388	2.5683	TCGA-DB-5270-01
GBMLGG(N=649)	17.4132	2.7721	TCGA-14-0789-01
GBMLGG(N=649)	22.8719	3.4907	TCGA-KT-A74X-01
GBMLGG(N=649)	64.9156	2.7379	TCGA-DB-A75L-01
GBMLGG(N=649)	31.7987	2.2237	TCGA-HT-A616-01
GBMLGG(N=649)	22.945	2.5288	TCGA-HT-A74K-01
GBMLGG(N=649)	35.0863	2.0776	TCGA-WY-A85C-01
GBMLGG(N=649)	49.42	2.6348	TCGA-FG-8188-01
GBMLGG(N=649)	44.5363	2.8877	TCGA-DU-A6S7-01
GBMLGG(N=649)	33.7374	3.1245	TCGA-DU-7294-01
GBMLGG(N=649)	83.2008	2.7444	TCGA-DB-5274-01
GBMLGG(N=649)	21.4909	4.3111	TCGA-28-5209-01
GBMLGG(N=649)	70.6119	3.2359	TCGA-HT-7604-01
GBMLGG(N=649)	43.7361	3.0859	TCGA-TM-A84F-01
GBMLGG(N=649)	41.2121	2.5338	TCGA-DB-A64O-01
GBMLGG(N=649)	111.255	2.982	TCGA-HT-7884-01
GBMLGG(N=649)	21.4464	2.7336	TCGA-S9-A6WE-01
GBMLGG(N=649)	56.0984	2.6647	TCGA-QH-A6CY-01
GBMLGG(N=649)	28.5437	3.8411	TCGA-S9-A6WM-01
GBMLGG(N=649)	69.5937	4.0567	TCGA-28-5218-01
GBMLGG(N=649)	25.1947	4.1628	TCGA-HT-A5RA-01
GBMLGG(N=649)	75.0452	3.6703	TCGA-QH-A6CV-01
GBMLGG(N=649)	91.5586	2.6805	TCGA-VM-A8CE-01
GBMLGG(N=649)	24.71	3.5362	TCGA-DU-5852-01
GBMLGG(N=649)	25.7186	2.5536	TCGA-P5-A72U-01
GBMLGG(N=649)	35.3038	4.0064	TCGA-28-2514-01
GBMLGG(N=649)	27.7234	4.5142	TCGA-06-5859-01
GBMLGG(N=649)	20.4623	2.7508	TCGA-DB-A75K-01
GBMLGG(N=649)	28.9095	3.5959	TCGA-DU-6410-01
GBMLGG(N=649)	42.3121	3.7204	TCGA-28-2509-01
GBMLGG(N=649)	53.3598	2.6873	TCGA-QH-A65Z-01
GBMLGG(N=649)	21.3199	4.7198	TCGA-14-1825-01
GBMLGG(N=649)	89.0836	2.6693	TCGA-S9-A7IY-01
GBMLGG(N=649)	69.7012	2.6602	TCGA-P5-A781-01
GBMLGG(N=649)	20.9045	4.1027	TCGA-TM-A84G-01
GBMLGG(N=649)	25.6269	2.8582	TCGA-HW-A5KK-01
GBMLGG(N=649)	26.7876	3.1523	TCGA-E1-5311-01
GBMLGG(N=649)	37.7438	3.7688	TCGA-FG-7634-01
GBMLGG(N=649)	85.2648	2.0844	TCGA-DU-5855-01
GBMLGG(N=649)	30.5131	2.1702	TCGA-DU-6396-01
GBMLGG(N=649)	67.6492	3.3842	TCGA-19-4065-01
GBMLGG(N=649)	49.5965	2.8916	TCGA-FG-7643-01
GBMLGG(N=649)	21.7902	2.6043	TCGA-TM-A84C-01
GBMLGG(N=649)	30.8005	3.6172	TCGA-02-2485-01
GBMLGG(N=649)	76.1313	2.7889	TCGA-WY-A85E-01
GBMLGG(N=649)	48.6835	3.6254	TCGA-12-1597-01
GBMLGG(N=649)	22.7069	4.0375	TCGA-28-1747-01
GBMLGG(N=649)	22.2114	2.5313	TCGA-28-2499-01
GBMLGG(N=649)	53.2215	3.8876	TCGA-DU-7298-01
GBMLGG(N=649)	31.9246	2.05	TCGA-TM-A84T-01
GBMLGG(N=649)	78.3762	2.9413	TCGA-FG-7637-01
GBMLGG(N=649)	38.2601	3.4945	TCGA-HT-A5R9-01
GBMLGG(N=649)	78.7592	2.5536	TCGA-HT-A614-01
GBMLGG(N=649)	55.1204	2.9618	TCGA-06-0649-01
GBMLGG(N=649)	78.5229	3.0706	TCGA-QH-A65R-01
GBMLGG(N=649)	51.2567	3.0961	TCGA-FG-A60J-01
GBMLGG(N=649)	5.8764	2.8858	TCGA-FG-8189-01
GBMLGG(N=649)	43.5532	2.6371	TCGA-P5-A5EY-01
GBMLGG(N=649)	20.6096	4.2312	TCGA-06-2564-01
GBMLGG(N=649)	30.3964	4.0584	TCGA-06-5408-01
GBMLGG(N=649)	38.2646	3.1162	TCGA-27-1832-01
GBMLGG(N=649)	30.2238	2.694	TCGA-14-1829-01
GBMLGG(N=649)	22.2301	3.0234	TCGA-32-2615-01
GBMLGG(N=649)	31.8275	4.0001	TCGA-06-0158-01
GBMLGG(N=649)	39.3965	2.5238	TCGA-HT-7882-01
GBMLGG(N=649)	22.5243	3.9506	TCGA-06-2558-01
GBMLGG(N=649)	43.6628	4.6502	TCGA-HT-8011-01
GBMLGG(N=649)	80.17	3.5559	TCGA-DU-6394-01
GBMLGG(N=649)	42.787	3.6405	TCGA-28-5216-01
GBMLGG(N=649)	40.6541	3.1112	TCGA-WY-A859-01
GBMLGG(N=649)	57.2327	2.7572	TCGA-WY-A85B-01
GBMLGG(N=649)	23.5726	3.5449	TCGA-S9-A6UB-01
GBMLGG(N=649)	28.9725	3.4517	TCGA-28-5207-01
GBMLGG(N=649)	57.5477	3.3717	TCGA-S9-A6U6-01
GBMLGG(N=649)	35.0537	4.4344	TCGA-DU-8168-01
GBMLGG(N=649)	15.381	3.2929	TCGA-41-2572-01
GBMLGG(N=649)	22.0276	3.0757	TCGA-06-0130-01
GBMLGG(N=649)	21.8003	3.0481	TCGA-DU-7290-01
GBMLGG(N=649)	51.0812	3.9232	TCGA-06-5416-01
GBMLGG(N=649)	22.0233	3.863	TCGA-06-0168-01
GBMLGG(N=649)	30.2551	3.5387	TCGA-DU-6407-01
GBMLGG(N=649)	29.4025	2.2421	TCGA-02-0055-01
GBMLGG(N=649)	78.6025	3.0463	TCGA-HT-7601-01
GBMLGG(N=649)	20.695	4.6804	TCGA-DU-6403-01
GBMLGG(N=649)	32.2762	3.9022	TCGA-06-5415-01
GBMLGG(N=649)	17.7435	2.7679	TCGA-DB-A64R-01
GBMLGG(N=649)	75.1184	3.1924	TCGA-E1-A7YQ-01
GBMLGG(N=649)	18.2852	4.1103	TCGA-DU-6405-01
GBMLGG(N=649)	34.594	2.4225	TCGA-HW-7487-01
GBMLGG(N=649)	46.2959	2.4701	TCGA-S9-A7R2-01
GBMLGG(N=649)	59.304	3.1011	TCGA-S9-A7J1-01
GBMLGG(N=649)	24.364	2.2663	TCGA-P5-A72X-01
GBMLGG(N=649)	29.548	3.4596	TCGA-E1-A7YJ-01
GBMLGG(N=649)	18.4507	3.5362	TCGA-06-5411-01
GBMLGG(N=649)	13.5699	3.5461	TCGA-26-5139-01
GBMLGG(N=649)	41.7845	2.7993	TCGA-HT-7690-01
GBMLGG(N=649)	27.876	2.7993	TCGA-HT-8105-01
GBMLGG(N=649)	36.433	3.0038	TCGA-76-4928-01
GBMLGG(N=649)	38.3257	3.9496	TCGA-06-0644-01
GBMLGG(N=649)	17.1669	3.034	TCGA-E1-A7YY-01
GBMLGG(N=649)	34.3633	3.1311	TCGA-HT-A619-01
GBMLGG(N=649)	64.5799	3.1844	TCGA-DU-6400-01
GBMLGG(N=649)	95.9734	2.9948	TCGA-P5-A737-01
GBMLGG(N=649)	84.2582	4.178	TCGA-14-0871-01
GBMLGG(N=649)	21.1555	3.0428	TCGA-RY-A83Y-01
GBMLGG(N=649)	51.3148	3.055	TCGA-HT-8564-01
GBMLGG(N=649)	67.0224	2.3871	TCGA-HT-7686-01
GBMLGG(N=649)	28.3754	3.3492	TCGA-E1-A7YM-01
GBMLGG(N=649)	40.3178	2.4252	TCGA-DH-A66F-01
GBMLGG(N=649)	66.7223	3.3911	TCGA-CS-5390-01
GBMLGG(N=649)	51.8767	3.5324	TCGA-S9-A6UA-01
GBMLGG(N=649)	46.6835	3.2557	TCGA-32-2632-01
GBMLGG(N=649)	14.9126	4.5547	TCGA-FG-A87N-01
GBMLGG(N=649)	25.5376	3.0533	TCGA-VV-A829-01
GBMLGG(N=649)	40.1538	2.8381	TCGA-DH-A66B-01
GBMLGG(N=649)	78.4211	2.9655	TCGA-HT-A5R7-01
GBMLGG(N=649)	23.1656	3.6405	TCGA-CS-5394-01
GBMLGG(N=649)	83.9216	2.8562	TCGA-DH-A66D-01
GBMLGG(N=649)	90.9675	3.154	TCGA-HT-7877-01
GBMLGG(N=649)	34.2051	3.2885	TCGA-06-0882-01
GBMLGG(N=649)	45.0619	3.1228	TCGA-DU-6542-01
GBMLGG(N=649)	22.9731	2.3048	TCGA-QH-A6CS-01
GBMLGG(N=649)	44.1008	3.5174	TCGA-E1-A7YU-01
GBMLGG(N=649)	90.9084	2.8321	TCGA-W9-A837-01
GBMLGG(N=649)	22.5398	3.0181	TCGA-IK-7675-01
GBMLGG(N=649)	52.2913	2.5263	TCGA-DU-7306-01
GBMLGG(N=649)	68.7288	2.9784	TCGA-QH-A6X9-01
GBMLGG(N=649)	27.7052	3.4556	TCGA-S9-A6U0-01
GBMLGG(N=649)	73.7152	2.7636	TCGA-HT-7611-01
GBMLGG(N=649)	99.707	3.0791	TCGA-S9-A6TY-01
GBMLGG(N=649)	41.0712	2.6161	TCGA-DU-A7TB-01
GBMLGG(N=649)	27.0474	2.8838	TCGA-19-2625-01
GBMLGG(N=649)	80.1864	3.0774	TCGA-IK-8125-01
GBMLGG(N=649)	27.8937	1.4547	TCGA-WH-A86K-01
GBMLGG(N=649)	102.917	2.0218	TCGA-DH-5141-01
GBMLGG(N=649)	37.2374	2.5163	TCGA-FG-A60L-01
GBMLGG(N=649)	21.1557	2.5288	TCGA-DB-5280-01
GBMLGG(N=649)	28.3806	3.7149	TCGA-S9-A7IX-01
GBMLGG(N=649)	24.953	3.1344	TCGA-32-1980-01
GBMLGG(N=649)	54.9211	3.0498	TCGA-FG-5965-01
GBMLGG(N=649)	47.792	2.1378	TCGA-P5-A5F6-01
GBMLGG(N=649)	57.2745	4.1011	TCGA-27-1834-01
GBMLGG(N=649)	67.8988	2.5036	TCGA-DU-7007-01
GBMLGG(N=649)	85.8861	1.2271	TCGA-HW-7490-01
GBMLGG(N=649)	25.7069	4.1111	TCGA-CS-6188-01
GBMLGG(N=649)	42.5375	3.9938	TCGA-CS-6668-01
GBMLGG(N=649)	40.02	4.0722	TCGA-DU-8165-01
GBMLGG(N=649)	72.3701	2.4386	TCGA-HT-7692-01
GBMLGG(N=649)	85.1922	5.3862	TCGA-TQ-A7RM-01
GBMLGG(N=649)	23.7368	3.6972	TCGA-DU-8161-01
GBMLGG(N=649)	57.1813	1.6512	TCGA-P5-A736-01
GBMLGG(N=649)	65.6887	1.0847	TCGA-DU-6401-01
GBMLGG(N=649)	30.9554	2.1606	TCGA-HT-A74H-01
GBMLGG(N=649)	21.5307	3.0842	TCGA-41-2571-01
GBMLGG(N=649)	85.1838	2.6138	TCGA-TQ-A7RV-01
GBMLGG(N=649)	22.356	2.5363	TCGA-14-0781-01
GBMLGG(N=649)	28.4122	2.982	TCGA-HT-7483-01
GBMLGG(N=649)	30.5532	2.7139	TCGA-HT-7620-01
GBMLGG(N=649)	67.5664	2.8622	TCGA-HT-7480-01
GBMLGG(N=649)	22.5716	4.2266	TCGA-06-0157-01
GBMLGG(N=649)	43.2091	4.9426	TCGA-S9-A7J0-01
GBMLGG(N=649)	45.5498	4.4108	TCGA-12-3653-01
GBMLGG(N=649)	50.7205	2.945	TCGA-TM-A84Q-01
GBMLGG(N=649)	14.7542	4.0807	TCGA-76-4926-01
GBMLGG(N=649)	91.0001	4.2781	TCGA-26-5133-01
GBMLGG(N=649)	21.4772	3.1442	TCGA-06-2562-01
GBMLGG(N=649)	73.653	2.7051	TCGA-RY-A847-01
GBMLGG(N=649)	80.2398	3.4971	TCGA-TQ-A7RQ-01
GBMLGG(N=649)	83.4455	3.0074	TCGA-TQ-A7RW-01
GBMLGG(N=649)	96.2124	2.4412	TCGA-FG-8191-01
GBMLGG(N=649)	23.6654	2.9692	TCGA-E1-A7YW-01
GBMLGG(N=649)	29.353	2.8482	TCGA-DB-5278-01
GBMLGG(N=649)	74.9396	3.7094	TCGA-E1-A7YS-01
GBMLGG(N=649)	56.4345	3.1045	TCGA-HT-7695-01
GBMLGG(N=649)	27.2478	3.2267	TCGA-DU-7012-01
GBMLGG(N=649)	34.194	2.909	TCGA-HT-7879-01
GBMLGG(N=649)	48.451	2.6278	TCGA-DU-A7TC-01
GBMLGG(N=649)	109.878	3.1908	TCGA-27-2521-01
GBMLGG(N=649)	42.9925	2.685	TCGA-HT-7680-01
GBMLGG(N=649)	15.5029	3.4622	TCGA-DB-A4X9-01
GBMLGG(N=649)	57.2744	3.011	TCGA-TQ-A7RI-01
GBMLGG(N=649)	91.3014	2.9243	TCGA-TM-A7CA-01
GBMLGG(N=649)	102.684	3.1604	TCGA-QH-A86X-01
GBMLGG(N=649)	73.3181	3.3076	TCGA-DU-A76R-01
GBMLGG(N=649)	26.7314	3.0671	TCGA-DH-5144-01
GBMLGG(N=649)	29.2942	4.382	TCGA-41-5651-01
GBMLGG(N=649)	33.8725	3.7335	TCGA-E1-A7Z2-01
GBMLGG(N=649)	105.375	2.5288	TCGA-DU-A5TP-01
GBMLGG(N=649)	20.1729	2.376	TCGA-06-0210-01
GBMLGG(N=649)	53.6352	2.5112	TCGA-FG-8187-01
GBMLGG(N=649)	64.5881	5.1351	TCGA-E1-5304-01
GBMLGG(N=649)	26.7197	4.2803	TCGA-CS-4943-01
GBMLGG(N=649)	28.8247	4.613	TCGA-19-5960-01
GBMLGG(N=649)	64.2949	4.1772	TCGA-06-0686-01
GBMLGG(N=649)	38.7907	4.5596	TCGA-DH-5140-01
GBMLGG(N=649)	94.8963	1.9452	TCGA-TM-A7CF-01
GBMLGG(N=649)	80.3099	3.0842	TCGA-DH-A7US-01
GBMLGG(N=649)	48.016	3.0074	TCGA-HT-A61B-01
GBMLGG(N=649)	88.357	2.5388	TCGA-E1-A7Z6-01
GBMLGG(N=649)	62.7254	2.4063	TCGA-HT-7857-01
GBMLGG(N=649)	47.0357	2.8055	TCGA-E1-5319-01
GBMLGG(N=649)	50.1851	1.3956	TCGA-DU-A5TS-01
GBMLGG(N=649)	43.5532	3.3563	TCGA-DU-6392-01
GBMLGG(N=649)	36.3166	1.7273	TCGA-QH-A6CU-01
GBMLGG(N=649)	64.7499	3.2251	TCGA-DU-6404-01
GBMLGG(N=649)	37.6754	3.4477	TCGA-VW-A8FI-01
GBMLGG(N=649)	37.9516	3.3278	TCGA-HT-A74L-01
GBMLGG(N=649)	18.4775	4.2434	TCGA-P5-A5EU-01
GBMLGG(N=649)	56.8048	2.1247	TCGA-P5-A5EZ-01
GBMLGG(N=649)	34.4324	3.2267	TCGA-S9-A89Z-01
GBMLGG(N=649)	97.1788	2.6019	TCGA-S9-A6TZ-01
GBMLGG(N=649)	35.6909	3.6635	TCGA-FG-5963-01
GBMLGG(N=649)	37.9586	2.4063	TCGA-HT-A61A-01
GBMLGG(N=649)	52.3926	2.0912	TCGA-S9-A89V-01
GBMLGG(N=649)	17.766	4.3456	TCGA-DB-A64W-01
GBMLGG(N=649)	80.9328	1.5115	TCGA-FG-A4MX-01
GBMLGG(N=649)	78.2604	3.3703	TCGA-P5-A72Z-01
GBMLGG(N=649)	61.8786	2.3843	TCGA-HT-8114-01
GBMLGG(N=649)	17.5216	3.7982	TCGA-06-2563-01
GBMLGG(N=649)	18.8105	2.183	TCGA-32-4213-01
GBMLGG(N=649)	33.4691	2.5561	TCGA-HT-7881-01
GBMLGG(N=649)	23.1067	3.928	TCGA-15-0742-01
GBMLGG(N=649)	22.7279	1.8201	TCGA-CS-4944-01
GBMLGG(N=649)	16.7327	3.5237	TCGA-06-0187-01
GBMLGG(N=649)	46.3312	5.1879	TCGA-19-1390-01
GBMLGG(N=649)	25.1435	2.4727	TCGA-S9-A7QX-01
GBMLGG(N=649)	38.3328	2.5087	TCGA-DU-A7TG-01
GBMLGG(N=649)	23.5454	4.0118	TCGA-DU-5874-01
GBMLGG(N=649)	33.9451	2.8994	TCGA-TQ-A8XE-01
GBMLGG(N=649)	28.0635	2.9674	TCGA-DU-7300-01
GBMLGG(N=649)	48.888	2.9356	TCGA-HT-7694-01
GBMLGG(N=649)	27.4621	4.0748	TCGA-HT-7471-01
GBMLGG(N=649)	84.8377	2.9469	TCGA-DB-A4XD-01
GBMLGG(N=649)	32.4822	3.0688	TCGA-TQ-A7RK-01
GBMLGG(N=649)	21.3049	2.6371	TCGA-HT-7475-01
GBMLGG(N=649)	25.5181	3.7614	TCGA-TQ-A7RO-01
GBMLGG(N=649)	66.0987	2.7292	TCGA-HT-7902-01
GBMLGG(N=649)	43.5664	2.9911	TCGA-FG-A711-01
GBMLGG(N=649)	44.0367	3.6184	TCGA-06-2557-01
GBMLGG(N=649)	31.1514	2.5948	TCGA-DB-5276-01
GBMLGG(N=649)	70.702	2.3394	TCGA-P5-A730-01
GBMLGG(N=649)	50.7557	4.2736	TCGA-E1-A7YD-01
GBMLGG(N=649)	90.7493	2.1574	TCGA-HT-A74O-01
GBMLGG(N=649)	51.3148	3.1045	TCGA-HT-8015-01
GBMLGG(N=649)	77.7757	2.5487	TCGA-HT-A74J-01
GBMLGG(N=649)	37.3211	3.5035	TCGA-06-0878-01
GBMLGG(N=649)	42.6247	4.1036	TCGA-DH-A669-01
GBMLGG(N=649)	78.5036	4.5293	TCGA-06-0129-01
GBMLGG(N=649)	38.3888	2.6715	TCGA-HT-A617-01
GBMLGG(N=649)	42.7545	2.9857	TCGA-16-1045-01
GBMLGG(N=649)	15.9543	4.546	TCGA-06-2567-01
GBMLGG(N=649)	27.3914	3.5863	TCGA-32-2616-01
GBMLGG(N=649)	77.8018	2.7073	TCGA-HT-7605-01
GBMLGG(N=649)	89.1709	2.7805	TCGA-S9-A6WO-01
GBMLGG(N=649)	12.5389	3.958	TCGA-28-5208-01
GBMLGG(N=649)	21.1161	4.0091	TCGA-06-1804-01
GBMLGG(N=649)	27.6138	2.7183	TCGA-QH-A6CX-01
GBMLGG(N=649)	30.6947	3.0038	TCGA-14-2554-01
GBMLGG(N=649)	48.4648	2.6255	TCGA-P5-A5F4-01
GBMLGG(N=649)	26.2799	3.2174	TCGA-DU-A76K-01
GBMLGG(N=649)	7.42204	2.2931	TCGA-VM-A8CH-01
GBMLGG(N=649)	78.1006	2.004	TCGA-HT-7609-01
GBMLGG(N=649)	23.1738	4.2706	TCGA-27-2528-01
GBMLGG(N=649)	23.1328	3.2915	TCGA-QH-A6X4-01
GBMLGG(N=649)	31.2015	2.036	TCGA-DH-A7UV-01
GBMLGG(N=649)	57.1761	2.93	TCGA-TM-A7C3-01
GBMLGG(N=649)	65.9798	3.5645	TCGA-S9-A6WG-01
GBMLGG(N=649)	16.9272	4.3053	TCGA-06-5858-01
GBMLGG(N=649)	108.724	3.1442	TCGA-FG-6690-01
GBMLGG(N=649)	70.8353	2.4386	TCGA-DU-8167-01
GBMLGG(N=649)	30.2897	2.7657	TCGA-QH-A65X-01
GBMLGG(N=649)	72.0019	1.7617	TCGA-P5-A780-01
GBMLGG(N=649)	75.9439	3.417	TCGA-E1-5302-01
GBMLGG(N=649)	74.6435	2.05	TCGA-14-1823-01
GBMLGG(N=649)	38.138	1.7009	TCGA-HW-A5KJ-01
GBMLGG(N=649)	18.1973	2.9356	TCGA-R8-A6MO-01
GBMLGG(N=649)	84.647	2.5511	TCGA-FG-7636-01
GBMLGG(N=649)	95.9523	2.1147	TCGA-CS-6290-01
GBMLGG(N=649)	27.3528	3.9327	TCGA-DU-5847-01
GBMLGG(N=649)	26.5006	4.6514	TCGA-DU-6406-01
GBMLGG(N=649)	38.4378	2.7763	TCGA-06-0743-01
GBMLGG(N=649)	25.8324	3.7028	TCGA-TM-A84B-01
LGG(N=500)	33.6436	2.8819	TCGA-S9-A7J2-01
LGG(N=500)	34.1961	5.1065	TCGA-E1-A7YI-01
LGG(N=500)	87.3954	3.3717	TCGA-DU-7302-01
LGG(N=500)	19.5858	2.043	TCGA-P5-A5EX-01
LGG(N=500)	32.4924	3.2826	TCGA-HT-8563-01
LGG(N=500)	49.4142	3.0074	TCGA-FG-A60K-01
LGG(N=500)	25.0697	3.7291	TCGA-CS-5397-01
LGG(N=500)	77.5944	3.5337	TCGA-E1-5322-01
LGG(N=500)	2.59638	2.233	TCGA-HT-8558-01
LGG(N=500)	43.6791	2.3816	TCGA-S9-A6U8-01
LGG(N=500)	53.6467	2.2051	TCGA-HT-7854-01
LGG(N=500)	33.6497	2.7073	TCGA-HT-7467-01
LGG(N=500)	38.1353	2.7826	TCGA-HT-7874-01
LGG(N=500)	54.2795	2.9469	TCGA-S9-A6TV-01
LGG(N=500)	18.5793	4.0348	TCGA-VM-A8CD-01
LGG(N=500)	39.4763	2.8034	TCGA-HT-7616-01
LGG(N=500)	35.7127	4.6294	TCGA-KT-A7W1-01
LGG(N=500)	88.8304	2.9167	TCGA-P5-A5F2-01
LGG(N=500)	27.1647	3.2174	TCGA-HT-7607-01
LGG(N=500)	30.5823	3.3379	TCGA-HT-7873-01
LGG(N=500)	54.5214	1.7316	TCGA-HT-7603-01
LGG(N=500)	56.7804	3.1604	TCGA-DB-A64P-01
LGG(N=500)	48.4027	2.9148	TCGA-HW-7486-01
LGG(N=500)	50.8399	2.3816	TCGA-P5-A5F1-01
LGG(N=500)	85.2203	1.6649	TCGA-DU-7011-01
LGG(N=500)	53.1992	2.8602	TCGA-P5-A77X-01
LGG(N=500)	97.0556	1.9786	TCGA-VM-A8CA-01
LGG(N=500)	102.944	2.5036	TCGA-DU-7015-01
LGG(N=500)	62.4131	2.7951	TCGA-TM-A7C5-01
LGG(N=500)	50.297	3.002	TCGA-DU-8162-01
LGG(N=500)	29.5962	2.6464	TCGA-TM-A84O-01
LGG(N=500)	55.1108	2.5112	TCGA-S9-A7R3-01
LGG(N=500)	47.6804	3.034	TCGA-TQ-A7RN-01
LGG(N=500)	19.4583	2.676	TCGA-DU-A6S6-01
LGG(N=500)	29.9175	2.4883	TCGA-P5-A735-01
LGG(N=500)	36.0221	2.5238	TCGA-HT-7691-01
LGG(N=500)	96.3573	2.3816	TCGA-FG-A6J1-01
LGG(N=500)	12.1551	2.496	TCGA-S9-A7R7-01
LGG(N=500)	27.5712	3.4752	TCGA-DU-6402-01
LGG(N=500)	33.3163	0.6969	TCGA-HT-7684-01
LGG(N=500)	35.1016	4.1384	TCGA-HT-8104-01
LGG(N=500)	16.5203	2.8014	TCGA-FN-7833-01
LGG(N=500)	66.1636	2.376	TCGA-HT-7473-01
LGG(N=500)	41.6981	3.7028	TCGA-TQ-A7RU-01
LGG(N=500)	90.0629	2.6783	TCGA-DB-A4XF-01
LGG(N=500)	36.4425	2.4465	TCGA-FG-A713-01
LGG(N=500)	18.356	3.6916	TCGA-E1-A7YL-01
LGG(N=500)	27.1814	3.4007	TCGA-CS-5396-01
LGG(N=500)	47.4837	3.9232	TCGA-HW-8322-01
LGG(N=500)	26.9564	2.1345	TCGA-S9-A6U9-01
LGG(N=500)	55.4657	2.824	TCGA-HT-7676-01
LGG(N=500)	52.4896	3.6816	TCGA-HT-7469-01
LGG(N=500)	51.799	2.5683	TCGA-HT-7478-01
LGG(N=500)	73.8041	2.0147	TCGA-DU-A5TW-01
LGG(N=500)	50.2302	2.6185	TCGA-S9-A6TX-01
LGG(N=500)	22.6577	3.6703	TCGA-RY-A83Z-01
LGG(N=500)	82.4696	2.9262	TCGA-FG-A6IZ-01
LGG(N=500)	27.0292	3.3521	TCGA-CS-4941-01
LGG(N=500)	62.5987	1.8801	TCGA-DH-A7UT-01
LGG(N=500)	55.8342	1.692	TCGA-DU-5871-01
LGG(N=500)	70.3924	2.128	TCGA-HW-8321-01
LGG(N=500)	53.5383	3.7356	TCGA-EZ-7264-01
LGG(N=500)	71.0413	2.6348	TCGA-CS-6666-01
LGG(N=500)	24.7341	3.7269	TCGA-HW-7491-01
LGG(N=500)	102.62	3.3435	TCGA-S9-A6U1-01
LGG(N=500)	72.0166	2.8117	TCGA-E1-5307-01
LGG(N=500)	20.0033	3.7898	TCGA-DU-A76L-01
LGG(N=500)	62.7768	2.8076	TCGA-HW-7495-01
LGG(N=500)	68.7434	3.5299	TCGA-HT-7481-01
LGG(N=500)	71.2115	3.1637	TCGA-DU-8163-01
LGG(N=500)	47.792	3.8788	TCGA-HT-8110-01
LGG(N=500)	42.2754	3.3675	TCGA-RY-A840-01
LGG(N=500)	36.4634	2.5462	TCGA-VM-A8C9-01
LGG(N=500)	30.059	3.3407	TCGA-HW-8319-01
LGG(N=500)	89.9069	2.8219	TCGA-QH-A6CW-01
LGG(N=500)	23.7216	3.3163	TCGA-DU-5870-01
LGG(N=500)	71.4059	3.2267	TCGA-TM-A84S-01
LGG(N=500)	69.7881	3.0376	TCGA-RY-A845-01
LGG(N=500)	67.2134	3.0199	TCGA-FG-8182-01
LGG(N=500)	27.5008	3.1062	TCGA-FG-6688-01
LGG(N=500)	40.2743	3.3278	TCGA-TQ-A7RP-01
LGG(N=500)	69.3094	2.3953	TCGA-HT-8113-01
LGG(N=500)	71.1648	2.8381	TCGA-HT-7689-01
LGG(N=500)	42.2187	2.6895	TCGA-FG-7638-01
LGG(N=500)	12.8168	4.3385	TCGA-DU-7013-01
LGG(N=500)	71.6326	2.828	TCGA-E1-A7Z3-01
LGG(N=500)	80.0473	2.6371	TCGA-HT-7476-01
LGG(N=500)	78.7172	3.3661	TCGA-TQ-A7RG-01
LGG(N=500)	60.6629	3.2677	TCGA-DU-A7T6-01
LGG(N=500)	46.2316	3.5682	TCGA-DB-A4XC-01
LGG(N=500)	30.4473	3.3619	TCGA-FG-A4MW-01
LGG(N=500)	92.3384	3.3321	TCGA-DH-5142-01
LGG(N=500)	27.1214	3.1294	TCGA-S9-A6U2-01
LGG(N=500)	87.2866	2.824	TCGA-TQ-A7RH-01
LGG(N=500)	74.2707	2.108	TCGA-DB-A75M-01
LGG(N=500)	102.973	2.6738	TCGA-HT-8012-01
LGG(N=500)	33.1135	2.9167	TCGA-S9-A7QW-01
LGG(N=500)	66.1645	1.614	TCGA-P5-A733-01
LGG(N=500)	90.2218	2.1213	TCGA-E1-A7Z4-01
LGG(N=500)	28.5177	1.6045	TCGA-DU-A5TR-01
LGG(N=500)	70.0138	2.2299	TCGA-FG-8185-01
LGG(N=500)	89.6132	2.0946	TCGA-HW-8320-01
LGG(N=500)	29.652	1.5902	TCGA-CS-6667-01
LGG(N=500)	52.9124	2.5731	TCGA-DU-5849-01
LGG(N=500)	80.484	2.9637	TCGA-DB-5279-01
LGG(N=500)	49.9913	3.2112	TCGA-CS-6670-01
LGG(N=500)	50.0727	2.5061	TCGA-DB-A64V-01
LGG(N=500)	26.2909	3.1426	TCGA-DU-5854-01
LGG(N=500)	77.8135	4.2914	TCGA-DH-A7UR-01
LGG(N=500)	97.3173	3.2511	TCGA-S9-A6WL-01
LGG(N=500)	33.2078	2.2723	TCGA-HT-7880-01
LGG(N=500)	77.1726	3.0127	TCGA-E1-5318-01
LGG(N=500)	31.9776	4.1587	TCGA-DU-6393-01
LGG(N=500)	81.8675	2.96	TCGA-DU-5853-01
LGG(N=500)	51.9928	4.4602	TCGA-TM-A84J-01
LGG(N=500)	34.2582	3.5237	TCGA-FG-5962-01
LGG(N=500)	34.1361	2.93	TCGA-F6-A8O4-01
LGG(N=500)	99.7225	2.6441	TCGA-S9-A7R1-01
LGG(N=500)	42.9174	3.9608	TCGA-TM-A84M-01
LGG(N=500)	60.6629	2.3677	TCGA-HT-8107-01
LGG(N=500)	39.6573	3.154	TCGA-P5-A5ET-01
LGG(N=500)	45.2938	1.9712	TCGA-P5-A72W-01
LGG(N=500)	58.3741	2.8096	TCGA-FG-A70Y-01
LGG(N=500)	18.3972	2.9432	TCGA-TM-A84R-01
LGG(N=500)	41.2453	2.0465	TCGA-HW-A5KM-01
LGG(N=500)	55.7593	4.2533	TCGA-HT-7477-01
LGG(N=500)	30.4757	3.6463	TCGA-FG-A87Q-01
LGG(N=500)	18.5258	3.7815	TCGA-FG-A70Z-01
LGG(N=500)	17.3116	3.7269	TCGA-FG-A4MU-01
LGG(N=500)	48.6968	3.5098	TCGA-DB-A4XB-01
LGG(N=500)	21.5928	2.3048	TCGA-WY-A85D-01
LGG(N=500)	92.9443	2.9507	TCGA-FG-7641-01
LGG(N=500)	13.3971	1.674	TCGA-DU-5872-01
LGG(N=500)	102.121	2.1345	TCGA-FG-6689-01
LGG(N=500)	76.3232	2.5238	TCGA-DB-5277-01
LGG(N=500)	33.3006	3.1377	TCGA-HT-A615-01
LGG(N=500)	62.8097	2.5585	TCGA-DU-7301-01
LGG(N=500)	54.1883	2.4465	TCGA-P5-A5EW-01
LGG(N=500)	38.2479	2.1702	TCGA-HT-A5RB-01
LGG(N=500)	29.8208	2.5288	TCGA-E1-A7YN-01
LGG(N=500)	20.7564	3.3278	TCGA-QH-A6XC-01
LGG(N=500)	14.8334	3.0199	TCGA-S9-A6WN-01
LGG(N=500)	82.3341	2.1766	TCGA-DB-A64L-01
LGG(N=500)	84.3738	3.981	TCGA-TM-A84I-01
LGG(N=500)	103.067	3.6018	TCGA-QH-A6CZ-01
LGG(N=500)	26.2699	1.5465	TCGA-WY-A858-01
LGG(N=500)	45.8831	3.2826	TCGA-VM-A8CB-01
LGG(N=500)	36.053	1.4704	TCGA-VM-A8CF-01
LGG(N=500)	78.8552	2.9875	TCGA-HT-7608-01
LGG(N=500)	47.9919	2.828	TCGA-CS-4938-01
LGG(N=500)	46.9538	2.4571	TCGA-QH-A6X5-01
LGG(N=500)	71.1029	2.5972	TCGA-DU-8166-01
LGG(N=500)	52.1542	2.9262	TCGA-HT-8018-01
LGG(N=500)	16.7054	3.3435	TCGA-DU-7292-01
LGG(N=500)	44.3608	1.4494	TCGA-S9-A6TU-01
LGG(N=500)	71.8134	1.9895	TCGA-DB-A75P-01
LGG(N=500)	97.5728	3.4556	TCGA-FG-6691-01
LGG(N=500)	56.6719	3.2988	TCGA-DU-6399-01
LGG(N=500)	65.3785	2.694	TCGA-S9-A7IQ-01
LGG(N=500)	35.3453	2.1862	TCGA-S9-A6WI-01
LGG(N=500)	39.8624	2.2783	TCGA-DB-A64S-01
LGG(N=500)	18.4326	3.5994	TCGA-FG-6692-01
LGG(N=500)	85.5346	2.6441	TCGA-HW-7489-01
LGG(N=500)	126.043	3.1572	TCGA-R8-A6YH-01
LGG(N=500)	63.9028	2.1541	TCGA-HT-A618-01
LGG(N=500)	44.7133	1.8119	TCGA-QH-A65S-01
LGG(N=500)	79.9683	2.167	TCGA-DU-7019-01
LGG(N=500)	17.8305	4.3263	TCGA-DU-A7TJ-01
LGG(N=500)	41.4701	2.4386	TCGA-TM-A84H-01
LGG(N=500)	37.0736	2.9893	TCGA-S9-A7R8-01
LGG(N=500)	76.1335	2.1213	TCGA-S9-A7R4-01
LGG(N=500)	83.7284	3.4556	TCGA-S9-A7J3-01
LGG(N=500)	26.894	2.6348	TCGA-TM-A84L-01
LGG(N=500)	31.0524	2.2872	TCGA-E1-A7YH-01
LGG(N=500)	61.7768	3.2915	TCGA-P5-A5EV-01
LGG(N=500)	29.7819	4.2227	TCGA-DU-A7TD-01
LGG(N=500)	52.7207	1.7828	TCGA-HW-A5KL-01
LGG(N=500)	27.496	3.3787	TCGA-RY-A83X-01
LGG(N=500)	51.185	3.492	TCGA-HT-7687-01
LGG(N=500)	23.184	2.6138	TCGA-WY-A85A-01
LGG(N=500)	45.8566	2.8158	TCGA-DB-5281-01
LGG(N=500)	40.9257	2.1476	TCGA-E1-A7YK-01
LGG(N=500)	86.3922	1.9188	TCGA-DU-A5TU-01
LGG(N=500)	58.6714	2.59	TCGA-DU-A7TA-01
LGG(N=500)	19.6226	3.8095	TCGA-CS-5395-01
LGG(N=500)	45.9162	2.2113	TCGA-TQ-A7RR-01
LGG(N=500)	80.7904	2.5948	TCGA-HT-A5R5-01
LGG(N=500)	21.9774	2.2603	TCGA-QH-A65V-01
LGG(N=500)	83.947	3.5923	TCGA-S9-A6WP-01
LGG(N=500)	81.9505	2.7292	TCGA-S9-A6U5-01
LGG(N=500)	76.704	3.3563	TCGA-E1-A7YO-01
LGG(N=500)	31.0926	3.6509	TCGA-QH-A6X8-01
LGG(N=500)	36.0931	2.9692	TCGA-HT-7610-01
LGG(N=500)	98.5292	3.2065	TCGA-HT-7875-01
LGG(N=500)	76.2583	2.6783	TCGA-R8-A6MK-01
LGG(N=500)	59.7991	2.9525	TCGA-P5-A5F0-01
LGG(N=500)	55.7673	2.872	TCGA-R8-A73M-01
LGG(N=500)	109.604	1.9527	TCGA-S9-A6TS-01
LGG(N=500)	45.7053	2.3222	TCGA-S9-A6TW-01
LGG(N=500)	49.8123	2.7314	TCGA-E1-5303-01
LGG(N=500)	25.6787	4.2297	TCGA-HT-7606-01
LGG(N=500)	32.3641	3.2018	TCGA-DU-6408-01
LGG(N=500)	72.7536	3.1507	TCGA-FG-5964-01
LGG(N=500)	36.0837	3.186	TCGA-DB-A64Q-01
LGG(N=500)	38.4583	2.8034	TCGA-S9-A7IZ-01
LGG(N=500)	87.3472	3.0757	TCGA-S9-A6WH-01
LGG(N=500)	72.3561	2.3788	TCGA-HT-7602-01
LGG(N=500)	43.0895	3.002	TCGA-DU-A6S8-01
LGG(N=500)	92.4241	2.5972	TCGA-HT-7858-01
LGG(N=500)	27.3776	3.6916	TCGA-HT-7860-01
LGG(N=500)	38.5954	3.6657	TCGA-DU-7006-01
LGG(N=500)	82.7644	2.685	TCGA-TQ-A7RS-01
LGG(N=500)	39.183	3.0533	TCGA-DU-7009-01
LGG(N=500)	52.1317	3.66	TCGA-DU-7010-01
LGG(N=500)	56.8435	2.6783	TCGA-QH-A6X3-01
LGG(N=500)	45.4896	3.2781	TCGA-DU-8164-01
LGG(N=500)	45.1469	3.5449	TCGA-DU-7018-01
LGG(N=500)	12.0804	3.0376	TCGA-RY-A843-01
LGG(N=500)	103.242	2.4412	TCGA-HT-7693-01
LGG(N=500)	38.1807	3.2297	TCGA-FG-A6J3-01
LGG(N=500)	66.8897	2.5238	TCGA-HT-8106-01
LGG(N=500)	25.8963	3.0654	TCGA-HT-7472-01
LGG(N=500)	77.9448	1.6649	TCGA-HT-7855-01
LGG(N=500)	46.0268	3.6136	TCGA-DB-A4XG-01
LGG(N=500)	18.5935	3.6486	TCGA-HT-A5RC-01
LGG(N=500)	52.5477	2.3508	TCGA-VM-A8C8-01
LGG(N=500)	32.2603	2.4198	TCGA-HT-7681-01
LGG(N=500)	33.6436	2.4649	TCGA-DU-A6S2-01
LGG(N=500)	76.769	2.8034	TCGA-DU-7309-01
LGG(N=500)	102.21	2.108	TCGA-DB-A4XH-01
LGG(N=500)	28.0492	3.3307	TCGA-HT-7485-01
LGG(N=500)	31.3127	2.3077	TCGA-VW-A7QS-01
LGG(N=500)	38.0668	2.2753	TCGA-VV-A86M-01
LGG(N=500)	48.2746	4.6212	TCGA-E1-A7YV-01
LGG(N=500)	33.8833	3.5706	TCGA-HT-7468-01
LGG(N=500)	92.2545	3.5237	TCGA-HT-7677-01
LGG(N=500)	34.3601	2.5388	TCGA-DU-A5TY-01
LGG(N=500)	49.8245	2.8622	TCGA-HT-8109-01
LGG(N=500)	34.9827	2.118	TCGA-HT-7479-01
LGG(N=500)	69.3474	3.0825	TCGA-DB-5275-01
LGG(N=500)	33.2389	2.578	TCGA-TM-A7C4-01
LGG(N=500)	64.9037	3.5875	TCGA-DH-A7UU-01
LGG(N=500)	31.2814	2.3788	TCGA-HT-A4DV-01
LGG(N=500)	47.1523	2.9128	TCGA-FG-8186-01
LGG(N=500)	32.0083	3.186	TCGA-FG-A4MT-01
LGG(N=500)	27.1325	3.3221	TCGA-E1-5305-01
LGG(N=500)	28.5343	2.4306	TCGA-CS-5393-01
LGG(N=500)	47.1621	2.6371	TCGA-DU-6395-01
LGG(N=500)	94.0175	1.6187	TCGA-DB-A64X-01
LGG(N=500)	49.0549	4.7367	TCGA-S9-A7IS-01
LGG(N=500)	42.9925	3.0163	TCGA-HT-7856-01
LGG(N=500)	56.3002	2.5437	TCGA-QH-A6XA-01
LGG(N=500)	43.787	2.2144	TCGA-P5-A77W-01
LGG(N=500)	30.2434	3.2959	TCGA-CS-4942-01
LGG(N=500)	29.1451	3.4411	TCGA-CS-6186-01
LGG(N=500)	77.6415	3.4358	TCGA-DU-7008-01
LGG(N=500)	68.2228	2.8701	TCGA-HT-7688-01
LGG(N=500)	28.0306	2.9205	TCGA-DU-A7T8-01
LGG(N=500)	44.4163	2.2663	TCGA-DU-A6S3-01
LGG(N=500)	64.7143	2.7117	TCGA-DB-A64U-01
LGG(N=500)	22.6756	5.0756	TCGA-HT-A61C-01
LGG(N=500)	35.9061	2.876	TCGA-TQ-A7RF-01
LGG(N=500)	13.6994	3.4752	TCGA-F6-A8O3-01
LGG(N=500)	32.1792	3.1829	TCGA-R8-A6ML-01
LGG(N=500)	40.625	2.8219	TCGA-DU-A5TT-01
LGG(N=500)	17.0821	2.6962	TCGA-QH-A870-01
LGG(N=500)	68.1875	2.376	TCGA-DB-A75O-01
LGG(N=500)	36.3992	3.034	TCGA-HT-8111-01
LGG(N=500)	62.9777	3.1491	TCGA-S9-A7QZ-01
LGG(N=500)	56.9036	2.7636	TCGA-DB-5273-01
LGG(N=500)	55.6654	2.8381	TCGA-HT-7470-01
LGG(N=500)	56.1251	2.4386	TCGA-FG-A4MY-01
LGG(N=500)	33.3587	2.7401	TCGA-HT-8108-01
LGG(N=500)	99.6673	3.741	TCGA-DB-A4XE-01
LGG(N=500)	62.507	4.1359	TCGA-HT-A4DS-01
LGG(N=500)	49.1599	3.208	TCGA-DU-8158-01
LGG(N=500)	71.4371	2.4386	TCGA-HT-7474-01
LGG(N=500)	64.9224	2.9338	TCGA-DH-5143-01
LGG(N=500)	111.18	2.6418	TCGA-TQ-A7RJ-01
LGG(N=500)	89.3921	2.0979	TCGA-S9-A7QY-01
LGG(N=500)	56.7415	2.7993	TCGA-DB-A4XA-01
LGG(N=500)	17.6994	2.3423	TCGA-P5-A731-01
LGG(N=500)	30.6596	3.3633	TCGA-E1-A7YE-01
LGG(N=500)	81.3896	3.0893	TCGA-FG-A710-01
LGG(N=500)	19.1629	2.7636	TCGA-HT-8010-01
LGG(N=500)	41.218	2.7572	TCGA-DU-7299-01
LGG(N=500)	70.1388	2.5683	TCGA-DB-5270-01
LGG(N=500)	22.8719	3.4907	TCGA-KT-A74X-01
LGG(N=500)	64.9156	2.7379	TCGA-DB-A75L-01
LGG(N=500)	31.7987	2.2237	TCGA-HT-A616-01
LGG(N=500)	22.945	2.5288	TCGA-HT-A74K-01
LGG(N=500)	35.0863	2.0776	TCGA-WY-A85C-01
LGG(N=500)	49.42	2.6348	TCGA-FG-8188-01
LGG(N=500)	44.5363	2.8877	TCGA-DU-A6S7-01
LGG(N=500)	33.7374	3.1245	TCGA-DU-7294-01
LGG(N=500)	83.2008	2.7444	TCGA-DB-5274-01
LGG(N=500)	70.6119	3.2359	TCGA-HT-7604-01
LGG(N=500)	43.7361	3.0859	TCGA-TM-A84F-01
LGG(N=500)	41.2121	2.5338	TCGA-DB-A64O-01
LGG(N=500)	111.255	2.982	TCGA-HT-7884-01
LGG(N=500)	21.4464	2.7336	TCGA-S9-A6WE-01
LGG(N=500)	56.0984	2.6647	TCGA-QH-A6CY-01
LGG(N=500)	28.5437	3.8411	TCGA-S9-A6WM-01
LGG(N=500)	25.1947	4.1628	TCGA-HT-A5RA-01
LGG(N=500)	75.0452	3.6703	TCGA-QH-A6CV-01
LGG(N=500)	91.5586	2.6805	TCGA-VM-A8CE-01
LGG(N=500)	24.71	3.5362	TCGA-DU-5852-01
LGG(N=500)	25.7186	2.5536	TCGA-P5-A72U-01
LGG(N=500)	20.4623	2.7508	TCGA-DB-A75K-01
LGG(N=500)	28.9095	3.5959	TCGA-DU-6410-01
LGG(N=500)	53.3598	2.6873	TCGA-QH-A65Z-01
LGG(N=500)	89.0836	2.6693	TCGA-S9-A7IY-01
LGG(N=500)	69.7012	2.6602	TCGA-P5-A781-01
LGG(N=500)	20.9045	4.1027	TCGA-TM-A84G-01
LGG(N=500)	25.6269	2.8582	TCGA-HW-A5KK-01
LGG(N=500)	26.7876	3.1523	TCGA-E1-5311-01
LGG(N=500)	37.7438	3.7688	TCGA-FG-7634-01
LGG(N=500)	85.2648	2.0844	TCGA-DU-5855-01
LGG(N=500)	30.5131	2.1702	TCGA-DU-6396-01
LGG(N=500)	49.5965	2.8916	TCGA-FG-7643-01
LGG(N=500)	21.7902	2.6043	TCGA-TM-A84C-01
LGG(N=500)	76.1313	2.7889	TCGA-WY-A85E-01
LGG(N=500)	53.2215	3.8876	TCGA-DU-7298-01
LGG(N=500)	31.9246	2.05	TCGA-TM-A84T-01
LGG(N=500)	78.3762	2.9413	TCGA-FG-7637-01
LGG(N=500)	38.2601	3.4945	TCGA-HT-A5R9-01
LGG(N=500)	78.7592	2.5536	TCGA-HT-A614-01
LGG(N=500)	78.5229	3.0706	TCGA-QH-A65R-01
LGG(N=500)	51.2567	3.0961	TCGA-FG-A60J-01
LGG(N=500)	5.8764	2.8858	TCGA-FG-8189-01
LGG(N=500)	43.5532	2.6371	TCGA-P5-A5EY-01
LGG(N=500)	39.3965	2.5238	TCGA-HT-7882-01
LGG(N=500)	43.6628	4.6502	TCGA-HT-8011-01
LGG(N=500)	80.17	3.5559	TCGA-DU-6394-01
LGG(N=500)	40.6541	3.1112	TCGA-WY-A859-01
LGG(N=500)	57.2327	2.7572	TCGA-WY-A85B-01
LGG(N=500)	23.5726	3.5449	TCGA-S9-A6UB-01
LGG(N=500)	57.5477	3.3717	TCGA-S9-A6U6-01
LGG(N=500)	35.0537	4.4344	TCGA-DU-8168-01
LGG(N=500)	21.8003	3.0481	TCGA-DU-7290-01
LGG(N=500)	30.2551	3.5387	TCGA-DU-6407-01
LGG(N=500)	78.6025	3.0463	TCGA-HT-7601-01
LGG(N=500)	20.695	4.6804	TCGA-DU-6403-01
LGG(N=500)	17.7435	2.7679	TCGA-DB-A64R-01
LGG(N=500)	75.1184	3.1924	TCGA-E1-A7YQ-01
LGG(N=500)	18.2852	4.1103	TCGA-DU-6405-01
LGG(N=500)	34.594	2.4225	TCGA-HW-7487-01
LGG(N=500)	46.2959	2.4701	TCGA-S9-A7R2-01
LGG(N=500)	59.304	3.1011	TCGA-S9-A7J1-01
LGG(N=500)	24.364	2.2663	TCGA-P5-A72X-01
LGG(N=500)	29.548	3.4596	TCGA-E1-A7YJ-01
LGG(N=500)	41.7845	2.7993	TCGA-HT-7690-01
LGG(N=500)	27.876	2.7993	TCGA-HT-8105-01
LGG(N=500)	17.1669	3.034	TCGA-E1-A7YY-01
LGG(N=500)	34.3633	3.1311	TCGA-HT-A619-01
LGG(N=500)	64.5799	3.1844	TCGA-DU-6400-01
LGG(N=500)	95.9734	2.9948	TCGA-P5-A737-01
LGG(N=500)	21.1555	3.0428	TCGA-RY-A83Y-01
LGG(N=500)	51.3148	3.055	TCGA-HT-8564-01
LGG(N=500)	67.0224	2.3871	TCGA-HT-7686-01
LGG(N=500)	28.3754	3.3492	TCGA-E1-A7YM-01
LGG(N=500)	40.3178	2.4252	TCGA-DH-A66F-01
LGG(N=500)	66.7223	3.3911	TCGA-CS-5390-01
LGG(N=500)	51.8767	3.5324	TCGA-S9-A6UA-01
LGG(N=500)	14.9126	4.5547	TCGA-FG-A87N-01
LGG(N=500)	25.5376	3.0533	TCGA-VV-A829-01
LGG(N=500)	40.1538	2.8381	TCGA-DH-A66B-01
LGG(N=500)	78.4211	2.9655	TCGA-HT-A5R7-01
LGG(N=500)	23.1656	3.6405	TCGA-CS-5394-01
LGG(N=500)	83.9216	2.8562	TCGA-DH-A66D-01
LGG(N=500)	90.9675	3.154	TCGA-HT-7877-01
LGG(N=500)	45.0619	3.1228	TCGA-DU-6542-01
LGG(N=500)	22.9731	2.3048	TCGA-QH-A6CS-01
LGG(N=500)	44.1008	3.5174	TCGA-E1-A7YU-01
LGG(N=500)	90.9084	2.8321	TCGA-W9-A837-01
LGG(N=500)	22.5398	3.0181	TCGA-IK-7675-01
LGG(N=500)	52.2913	2.5263	TCGA-DU-7306-01
LGG(N=500)	68.7288	2.9784	TCGA-QH-A6X9-01
LGG(N=500)	27.7052	3.4556	TCGA-S9-A6U0-01
LGG(N=500)	73.7152	2.7636	TCGA-HT-7611-01
LGG(N=500)	99.707	3.0791	TCGA-S9-A6TY-01
LGG(N=500)	41.0712	2.6161	TCGA-DU-A7TB-01
LGG(N=500)	80.1864	3.0774	TCGA-IK-8125-01
LGG(N=500)	27.8937	1.4547	TCGA-WH-A86K-01
LGG(N=500)	102.917	2.0218	TCGA-DH-5141-01
LGG(N=500)	37.2374	2.5163	TCGA-FG-A60L-01
LGG(N=500)	21.1557	2.5288	TCGA-DB-5280-01
LGG(N=500)	28.3806	3.7149	TCGA-S9-A7IX-01
LGG(N=500)	54.9211	3.0498	TCGA-FG-5965-01
LGG(N=500)	47.792	2.1378	TCGA-P5-A5F6-01
LGG(N=500)	67.8988	2.5036	TCGA-DU-7007-01
LGG(N=500)	85.8861	1.2271	TCGA-HW-7490-01
LGG(N=500)	25.7069	4.1111	TCGA-CS-6188-01
LGG(N=500)	42.5375	3.9938	TCGA-CS-6668-01
LGG(N=500)	40.02	4.0722	TCGA-DU-8165-01
LGG(N=500)	72.3701	2.4386	TCGA-HT-7692-01
LGG(N=500)	85.1922	5.3862	TCGA-TQ-A7RM-01
LGG(N=500)	23.7368	3.6972	TCGA-DU-8161-01
LGG(N=500)	57.1813	1.6512	TCGA-P5-A736-01
LGG(N=500)	65.6887	1.0847	TCGA-DU-6401-01
LGG(N=500)	30.9554	2.1606	TCGA-HT-A74H-01
LGG(N=500)	85.1838	2.6138	TCGA-TQ-A7RV-01
LGG(N=500)	28.4122	2.982	TCGA-HT-7483-01
LGG(N=500)	30.5532	2.7139	TCGA-HT-7620-01
LGG(N=500)	67.5664	2.8622	TCGA-HT-7480-01
LGG(N=500)	43.2091	4.9426	TCGA-S9-A7J0-01
LGG(N=500)	50.7205	2.945	TCGA-TM-A84Q-01
LGG(N=500)	73.653	2.7051	TCGA-RY-A847-01
LGG(N=500)	80.2398	3.4971	TCGA-TQ-A7RQ-01
LGG(N=500)	83.4455	3.0074	TCGA-TQ-A7RW-01
LGG(N=500)	96.2124	2.4412	TCGA-FG-8191-01
LGG(N=500)	23.6654	2.9692	TCGA-E1-A7YW-01
LGG(N=500)	29.353	2.8482	TCGA-DB-5278-01
LGG(N=500)	74.9396	3.7094	TCGA-E1-A7YS-01
LGG(N=500)	56.4345	3.1045	TCGA-HT-7695-01
LGG(N=500)	27.2478	3.2267	TCGA-DU-7012-01
LGG(N=500)	34.194	2.909	TCGA-HT-7879-01
LGG(N=500)	48.451	2.6278	TCGA-DU-A7TC-01
LGG(N=500)	42.9925	2.685	TCGA-HT-7680-01
LGG(N=500)	15.5029	3.4622	TCGA-DB-A4X9-01
LGG(N=500)	57.2744	3.011	TCGA-TQ-A7RI-01
LGG(N=500)	91.3014	2.9243	TCGA-TM-A7CA-01
LGG(N=500)	102.684	3.1604	TCGA-QH-A86X-01
LGG(N=500)	73.3181	3.3076	TCGA-DU-A76R-01
LGG(N=500)	26.7314	3.0671	TCGA-DH-5144-01
LGG(N=500)	33.8725	3.7335	TCGA-E1-A7Z2-01
LGG(N=500)	105.375	2.5288	TCGA-DU-A5TP-01
LGG(N=500)	53.6352	2.5112	TCGA-FG-8187-01
LGG(N=500)	64.5881	5.1351	TCGA-E1-5304-01
LGG(N=500)	26.7197	4.2803	TCGA-CS-4943-01
LGG(N=500)	38.7907	4.5596	TCGA-DH-5140-01
LGG(N=500)	94.8963	1.9452	TCGA-TM-A7CF-01
LGG(N=500)	80.3099	3.0842	TCGA-DH-A7US-01
LGG(N=500)	48.016	3.0074	TCGA-HT-A61B-01
LGG(N=500)	88.357	2.5388	TCGA-E1-A7Z6-01
LGG(N=500)	62.7254	2.4063	TCGA-HT-7857-01
LGG(N=500)	47.0357	2.8055	TCGA-E1-5319-01
LGG(N=500)	50.1851	1.3956	TCGA-DU-A5TS-01
LGG(N=500)	43.5532	3.3563	TCGA-DU-6392-01
LGG(N=500)	36.3166	1.7273	TCGA-QH-A6CU-01
LGG(N=500)	64.7499	3.2251	TCGA-DU-6404-01
LGG(N=500)	37.6754	3.4477	TCGA-VW-A8FI-01
LGG(N=500)	37.9516	3.3278	TCGA-HT-A74L-01
LGG(N=500)	18.4775	4.2434	TCGA-P5-A5EU-01
LGG(N=500)	56.8048	2.1247	TCGA-P5-A5EZ-01
LGG(N=500)	34.4324	3.2267	TCGA-S9-A89Z-01
LGG(N=500)	97.1788	2.6019	TCGA-S9-A6TZ-01
LGG(N=500)	35.6909	3.6635	TCGA-FG-5963-01
LGG(N=500)	37.9586	2.4063	TCGA-HT-A61A-01
LGG(N=500)	52.3926	2.0912	TCGA-S9-A89V-01
LGG(N=500)	17.766	4.3456	TCGA-DB-A64W-01
LGG(N=500)	80.9328	1.5115	TCGA-FG-A4MX-01
LGG(N=500)	78.2604	3.3703	TCGA-P5-A72Z-01
LGG(N=500)	61.8786	2.3843	TCGA-HT-8114-01
LGG(N=500)	33.4691	2.5561	TCGA-HT-7881-01
LGG(N=500)	22.7279	1.8201	TCGA-CS-4944-01
LGG(N=500)	25.1435	2.4727	TCGA-S9-A7QX-01
LGG(N=500)	38.3328	2.5087	TCGA-DU-A7TG-01
LGG(N=500)	23.5454	4.0118	TCGA-DU-5874-01
LGG(N=500)	33.9451	2.8994	TCGA-TQ-A8XE-01
LGG(N=500)	28.0635	2.9674	TCGA-DU-7300-01
LGG(N=500)	48.888	2.9356	TCGA-HT-7694-01
LGG(N=500)	27.4621	4.0748	TCGA-HT-7471-01
LGG(N=500)	84.8377	2.9469	TCGA-DB-A4XD-01
LGG(N=500)	32.4822	3.0688	TCGA-TQ-A7RK-01
LGG(N=500)	21.3049	2.6371	TCGA-HT-7475-01
LGG(N=500)	25.5181	3.7614	TCGA-TQ-A7RO-01
LGG(N=500)	66.0987	2.7292	TCGA-HT-7902-01
LGG(N=500)	43.5664	2.9911	TCGA-FG-A711-01
LGG(N=500)	31.1514	2.5948	TCGA-DB-5276-01
LGG(N=500)	70.702	2.3394	TCGA-P5-A730-01
LGG(N=500)	50.7557	4.2736	TCGA-E1-A7YD-01
LGG(N=500)	90.7493	2.1574	TCGA-HT-A74O-01
LGG(N=500)	51.3148	3.1045	TCGA-HT-8015-01
LGG(N=500)	77.7757	2.5487	TCGA-HT-A74J-01
LGG(N=500)	42.6247	4.1036	TCGA-DH-A669-01
LGG(N=500)	38.3888	2.6715	TCGA-HT-A617-01
LGG(N=500)	77.8018	2.7073	TCGA-HT-7605-01
LGG(N=500)	89.1709	2.7805	TCGA-S9-A6WO-01
LGG(N=500)	27.6138	2.7183	TCGA-QH-A6CX-01
LGG(N=500)	48.4648	2.6255	TCGA-P5-A5F4-01
LGG(N=500)	26.2799	3.2174	TCGA-DU-A76K-01
LGG(N=500)	7.42204	2.2931	TCGA-VM-A8CH-01
LGG(N=500)	78.1006	2.004	TCGA-HT-7609-01
LGG(N=500)	23.1328	3.2915	TCGA-QH-A6X4-01
LGG(N=500)	31.2015	2.036	TCGA-DH-A7UV-01
LGG(N=500)	57.1761	2.93	TCGA-TM-A7C3-01
LGG(N=500)	65.9798	3.5645	TCGA-S9-A6WG-01
LGG(N=500)	108.724	3.1442	TCGA-FG-6690-01
LGG(N=500)	70.8353	2.4386	TCGA-DU-8167-01
LGG(N=500)	30.2897	2.7657	TCGA-QH-A65X-01
LGG(N=500)	72.0019	1.7617	TCGA-P5-A780-01
LGG(N=500)	75.9439	3.417	TCGA-E1-5302-01
LGG(N=500)	38.138	1.7009	TCGA-HW-A5KJ-01
LGG(N=500)	18.1973	2.9356	TCGA-R8-A6MO-01
LGG(N=500)	84.647	2.5511	TCGA-FG-7636-01
LGG(N=500)	95.9523	2.1147	TCGA-CS-6290-01
LGG(N=500)	27.3528	3.9327	TCGA-DU-5847-01
LGG(N=500)	26.5006	4.6514	TCGA-DU-6406-01
LGG(N=500)	25.8324	3.7028	TCGA-TM-A84B-01
CESC(N=286)	30.7732	3.091	TCGA-EK-A2RE-01
CESC(N=286)	60.913	3.6486	TCGA-IR-A3L7-01
CESC(N=286)	34.5617	4.2312	TCGA-Q1-A73Q-01
CESC(N=286)	53.093	2.5924	TCGA-C5-A1MF-01
CESC(N=286)	59.8242	3.2632	TCGA-EX-A3L1-01
CESC(N=286)	28.6468	4.0515	TCGA-JW-A5VI-01
CESC(N=286)	24.3391	4.1027	TCGA-EA-A1QT-01
CESC(N=286)	47.2477	2.3898	TCGA-UC-A7PG-01
CESC(N=286)	58.9122	3.4358	TCGA-EA-A97N-01
CESC(N=286)	39.536	3.1228	TCGA-EA-A3QD-01
CESC(N=286)	63.7473	3.0757	TCGA-C5-A1ME-01
CESC(N=286)	41.0143	4.0867	TCGA-C5-A8YR-01
CESC(N=286)	42.36	2.826	TCGA-FU-A40J-01
CESC(N=286)	27.7987	4.4608	TCGA-VS-A9V5-01
CESC(N=286)	41.1833	4.1587	TCGA-MY-A913-01
CESC(N=286)	27.2314	3.4661	TCGA-VS-A8Q9-01
CESC(N=286)	47.455	3.6861	TCGA-DS-A0VL-01
CESC(N=286)	35.6209	2.6895	TCGA-VS-A9UU-01
CESC(N=286)	35.437	2.7444	TCGA-ZJ-AAXN-01
CESC(N=286)	38.8315	4.0782	TCGA-VS-A9U6-01
CESC(N=286)	50.334	3.5035	TCGA-C5-A2LX-01
CESC(N=286)	20.5987	3.3535	TCGA-C5-A1M8-01
CESC(N=286)	36.7497	3.1245	TCGA-C5-A7CJ-01
CESC(N=286)	34.7452	3.7961	TCGA-GH-A9DA-01
CESC(N=286)	29.3349	3.5473	TCGA-EA-A5O9-01
CESC(N=286)	23.5075	2.9747	TCGA-Q1-A73P-01
CESC(N=286)	35.3636	3.9901	TCGA-C5-A8XK-01
CESC(N=286)	35.6715	3.5098	TCGA-C5-A907-01
CESC(N=286)	55.2341	3.9346	TCGA-VS-A9UD-01
CESC(N=286)	55.1722	2.7847	TCGA-C5-A7CM-01
CESC(N=286)	34.2138	3.5633	TCGA-VS-A9V2-01
CESC(N=286)	40.8993	3.9636	TCGA-VS-A94Y-01
CESC(N=286)	49.42	3.6759	TCGA-C5-A8ZZ-01
CESC(N=286)	26.9564	3.8621	TCGA-VS-A9UJ-01
CESC(N=286)	80.8691	2.651	TCGA-ZJ-AAXI-01
CESC(N=286)	47.9107	4.0019	TCGA-Q1-A6DT-01
CESC(N=286)	40.3673	3.868	TCGA-VS-A9UQ-01
CESC(N=286)	32.2379	3.7815	TCGA-VS-A8EG-01
CESC(N=286)	38.6375	3.0859	TCGA-EX-A69L-01
CESC(N=286)	28.1284	3.1523	TCGA-Q1-A73O-01
CESC(N=286)	49.42	3.154	TCGA-VS-A8QC-01
CESC(N=286)	24.2799	2.6019	TCGA-EA-A5ZE-01
CESC(N=286)	32.4319	4.6826	TCGA-ZJ-A8QO-01
CESC(N=286)	67.4315	3.3134	TCGA-JX-A5QV-01
CESC(N=286)	63.54	3.3591	TCGA-EK-A2GZ-01
CESC(N=286)	31.363	3.4622	TCGA-EK-A2R9-01
CESC(N=286)	38.2606	2.9839	TCGA-IR-A3LL-01
CESC(N=286)	86.7256	3.3336	TCGA-C5-A1M5-01
CESC(N=286)	56.8766	2.8462	TCGA-C5-A7X8-01
CESC(N=286)	26.6899	3.3856	TCGA-EA-A3HS-01
CESC(N=286)	32.4319	2.7931	TCGA-IR-A3LH-01
CESC(N=286)	29.1813	4.0091	TCGA-C5-A1M9-01
CESC(N=286)	56.6876	2.9729	TCGA-DG-A2KJ-01
CESC(N=286)	37.9442	3.9147	TCGA-Q1-A5R3-01
CESC(N=286)	39.1964	3.644	TCGA-HG-A2PA-01
CESC(N=286)	31.3525	4.1441	TCGA-VS-A9V3-01
CESC(N=286)	40.9079	3.4129	TCGA-VS-A9UH-01
CESC(N=286)	54.1922	2.6693	TCGA-JX-A3PZ-01
CESC(N=286)	76.2942	2.7051	TCGA-C5-A1MP-01
CESC(N=286)	45.9477	2.872	TCGA-MU-A5YI-01
CESC(N=286)	32.6237	4.3834	TCGA-VS-A8QA-01
CESC(N=286)	40.4902	2.8779	TCGA-FU-A5XV-01
CESC(N=286)	42.0637	2.6418	TCGA-EX-A8YF-01
CESC(N=286)	31.5053	3.4371	TCGA-ZJ-A8QR-01
CESC(N=286)	40.0846	2.6278	TCGA-IR-A3LB-01
CESC(N=286)	40.6192	3.6207	TCGA-EK-A2PI-01
CESC(N=286)	24.9944	3.0217	TCGA-HM-A6W2-01
CESC(N=286)	47.0401	3.4843	TCGA-IR-A3LF-01
CESC(N=286)	50.8201	2.9488	TCGA-VS-A8QF-01
CESC(N=286)	41.5128	3.287	TCGA-VS-AA62-01
CESC(N=286)	42.7733	4.01	TCGA-C5-A7UE-01
CESC(N=286)	33.2743	2.5238	TCGA-DS-A5RQ-01
CESC(N=286)	54.9111	3.4398	TCGA-BI-A20A-01
CESC(N=286)	32.6039	4.0601	TCGA-EA-A3HU-01
CESC(N=286)	75.5386	3.8749	TCGA-EK-A2RM-01
CESC(N=286)	30.988	3.6428	TCGA-DG-A2KK-01
CESC(N=286)	56.369	4.3492	TCGA-C5-A1MI-01
CESC(N=286)	34.2138	3.7237	TCGA-JW-A852-01
CESC(N=286)	51.1296	3.0376	TCGA-EK-A2RA-01
CESC(N=286)	31.6288	3.4804	TCGA-EK-A2RB-01
CESC(N=286)	57.7569	3.6771	TCGA-C5-A1MJ-01
CESC(N=286)	37.0395	3.4384	TCGA-C5-A1BE-01
CESC(N=286)	36.8632	4.3965	TCGA-ZJ-AAXT-01
CESC(N=286)	44.0364	3.8471	TCGA-LP-A7HU-01
CESC(N=286)	29.2581	3.7919	TCGA-2W-A8YY-01
CESC(N=286)	59.3264	3.8451	TCGA-EA-A411-01
CESC(N=286)	22.5494	4.1277	TCGA-C5-A1MN-01
CESC(N=286)	29.5953	4.3378	TCGA-C5-A2M2-01
CESC(N=286)	42.7546	2.9375	TCGA-EK-A2PK-01
CESC(N=286)	21.6681	4.4344	TCGA-EA-A410-01
CESC(N=286)	29.7076	4.5361	TCGA-VS-A952-01
CESC(N=286)	29.5611	3.0428	TCGA-EK-A2IP-01
CESC(N=286)	52.95	3.4371	TCGA-EK-A2PG-01
CESC(N=286)	31.2602	3.3717	TCGA-FU-A3YQ-01
CESC(N=286)	69.188	3.2343	TCGA-DS-A1OB-01
CESC(N=286)	38.2606	3.6827	TCGA-VS-A959-01
CESC(N=286)	50.2795	2.5707	TCGA-EK-A2R7-01
CESC(N=286)	66.5501	3.838	TCGA-JW-A5VJ-01
CESC(N=286)	38.332	4.3082	TCGA-C5-A7UH-01
CESC(N=286)	57.0783	4.4236	TCGA-MA-AA3Z-01
CESC(N=286)	29.1451	3.6894	TCGA-VS-A9UR-01
CESC(N=286)	37.1033	2.8877	TCGA-EK-A3GN-01
CESC(N=286)	62.6133	3.0305	TCGA-DS-A3LQ-01
CESC(N=286)	44.8103	2.9186	TCGA-ZJ-AAXU-01
CESC(N=286)	39.076	4.0028	TCGA-VS-A9UY-01
CESC(N=286)	43.9208	3.4739	TCGA-ZJ-AAXA-01
CESC(N=286)	34.9625	3.5523	TCGA-EK-A2RO-01
CESC(N=286)	26.6102	3.5035	TCGA-DS-A0VM-01
CESC(N=286)	34.4694	3.9901	TCGA-EX-A1H5-01
CESC(N=286)	38.3366	2.8955	TCGA-FU-A3EO-01
CESC(N=286)	28.9954	3.3773	TCGA-EK-A2RK-01
CESC(N=286)	58.7557	3.3773	TCGA-C5-A1BL-01
CESC(N=286)	39.0506	3.863	TCGA-Q1-A73S-01
CESC(N=286)	66.4769	2.872	TCGA-PN-A8MA-01
CESC(N=286)	24.893	3.9496	TCGA-DS-A7WF-01
CESC(N=286)	39.6094	3.4596	TCGA-C5-A7X3-01
CESC(N=286)	58.8035	2.7551	TCGA-HM-A3JK-01
CESC(N=286)	29.7702	2.2901	TCGA-ZJ-AAXJ-01
CESC(N=286)	28.8818	3.6657	TCGA-VS-A9V1-01
CESC(N=286)	35.3	3.7992	TCGA-FU-A3HZ-01
CESC(N=286)	29.2859	2.96	TCGA-EA-A78R-01
CESC(N=286)	47.9968	3.9403	TCGA-JW-A5VG-01
CESC(N=286)	44.3717	4.1523	TCGA-VS-A9UV-01
CESC(N=286)	34.594	3.7204	TCGA-C5-A8YT-01
CESC(N=286)	32.9467	2.8502	TCGA-ZX-AA5X-01
CESC(N=286)	28.3614	3.5473	TCGA-VS-A958-01
CESC(N=286)	37.7107	3.3134	TCGA-VS-A8EL-01
CESC(N=286)	32.2675	3.7992	TCGA-ZJ-AB0I-01
CESC(N=286)	48.1845	4.3292	TCGA-VS-A950-01
CESC(N=286)	23.0627	3.4752	TCGA-IR-A3LK-01
CESC(N=286)	58.7029	4.0969	TCGA-DS-A1OC-01
CESC(N=286)	32.5367	3.29	TCGA-MA-AA3W-01
CESC(N=286)	55.4149	5.3646	TCGA-VS-A9UL-01
CESC(N=286)	40.5278	4.2134	TCGA-VS-A9UO-01
CESC(N=286)	40.7715	3.7335	TCGA-C5-A8XJ-01
CESC(N=286)	37.4101	3.2617	TCGA-C5-A7CL-01
CESC(N=286)	59.304	3.0181	TCGA-FU-A3NI-01
CESC(N=286)	51.5435	4.0858	TCGA-EA-A439-01
CESC(N=286)	37.4592	4.0567	TCGA-VS-A9V0-01
CESC(N=286)	37.8319	3.4264	TCGA-EK-A3GK-01
CESC(N=286)	53.8374	3.1228	TCGA-C5-A7CG-01
CESC(N=286)	23.0459	3.2313	TCGA-C5-A1BI-01
CESC(N=286)	31.5968	3.3464	TCGA-HM-A3JJ-01
CESC(N=286)	37.7514	3.47	TCGA-C5-A7UI-01
CESC(N=286)	47.7462	3.0893	TCGA-ZJ-AAXD-01
CESC(N=286)	28.9604	3.6463	TCGA-EK-A2R8-01
CESC(N=286)	47.3763	4.4816	TCGA-VS-A9UP-01
CESC(N=286)	52.7637	2.6395	TCGA-C5-A1BF-01
CESC(N=286)	31.5964	2.5213	TCGA-EX-A69M-01
CESC(N=286)	68.0642	3.034	TCGA-EA-A5ZD-01
CESC(N=286)	38.4378	3.4384	TCGA-JX-A3Q0-01
CESC(N=286)	52.7486	3.7313	TCGA-BI-A0VS-01
CESC(N=286)	57.3894	2.8055	TCGA-VS-A8EJ-01
CESC(N=286)	53.5876	3.7888	TCGA-DR-A0ZL-01
CESC(N=286)	57.0231	4.4443	TCGA-MA-AA41-01
CESC(N=286)	32.7407	3.3619	TCGA-EA-A3HQ-01
CESC(N=286)	33.7917	2.9109	TCGA-LP-A5U2-01
CESC(N=286)	37.6544	4.0841	TCGA-EA-A43B-01
CESC(N=286)	44.224	2.4805	TCGA-IR-A3LI-01
CESC(N=286)	44.3076	3.551	TCGA-VS-A8EI-01
CESC(N=286)	32.4774	2.4934	TCGA-EA-A3Y4-01
CESC(N=286)	35.3	3.5299	TCGA-UC-A7PF-01
CESC(N=286)	42.713	4.847	TCGA-VS-A9UB-01
CESC(N=286)	34.3963	3.5424	TCGA-UC-A7PI-01
CESC(N=286)	42.4117	2.8701	TCGA-DG-A2KL-01
CESC(N=286)	52.5744	3.335	TCGA-JW-AAVH-01
CESC(N=286)	43.2936	3.7888	TCGA-Q1-A5R1-01
CESC(N=286)	35.676	2.8779	TCGA-EK-A2PL-01
CESC(N=286)	29.4055	3.9393	TCGA-Q1-A6DW-01
CESC(N=286)	31.5921	4.1294	TCGA-C5-A2M1-01
CESC(N=286)	30.171	1.9415	TCGA-R2-A69V-01
CESC(N=286)	57.0533	3.5262	TCGA-EA-A5ZF-01
CESC(N=286)	55.3033	3.3938	TCGA-FU-A23L-01
CESC(N=286)	51.5687	3.6474	TCGA-DS-A1OA-01
CESC(N=286)	36.3657	4.1595	TCGA-EK-A2H1-01
CESC(N=286)	41.6168	3.287	TCGA-LP-A4AU-01
CESC(N=286)	36.0043	3.6184	TCGA-VS-A9U7-01
CESC(N=286)	37.8488	3.2766	TCGA-C5-A2LS-01
CESC(N=286)	28.475	3.7453	TCGA-MA-AA3Y-01
CESC(N=286)	36.3382	2.6533	TCGA-DG-A2KM-01
CESC(N=286)	44.0467	2.9747	TCGA-C5-A3HF-01
CESC(N=286)	41.9337	2.824	TCGA-C5-A2LT-01
CESC(N=286)	26.9806	2.7615	TCGA-C5-A1BK-01
CESC(N=286)	57.6002	4.17	TCGA-UC-A7PD-01
CESC(N=286)	36.9185	3.4791	TCGA-VS-A9UZ-01
CESC(N=286)	51.891	3.3731	TCGA-DS-A1OD-01
CESC(N=286)	60.2971	4.1986	TCGA-C5-A8XH-01
CESC(N=286)	28.4948	3.5098	TCGA-EK-A2RC-01
CESC(N=286)	49.846	2.6873	TCGA-JX-A3Q8-01
CESC(N=286)	24.71	4.623	TCGA-JW-A5VL-01
CESC(N=286)	44.478	2.5061	TCGA-DS-A7WI-01
CESC(N=286)	53.7521	3.4304	TCGA-VS-A953-01
CESC(N=286)	66.1875	3.7688	TCGA-VS-A957-01
CESC(N=286)	20.2123	3.5374	TCGA-JW-A5VH-01
CESC(N=286)	36.109	3.7688	TCGA-EA-A3HR-01
CESC(N=286)	36.5343	3.1393	TCGA-EA-A3QE-01
CESC(N=286)	41.1719	3.6066	TCGA-WL-A834-01
CESC(N=286)	40.403	2.9507	TCGA-C5-A901-01
CESC(N=286)	31.6702	3.0074	TCGA-JW-A69B-01
CESC(N=286)	44.5895	3.7603	TCGA-FU-A3HY-01
CESC(N=286)	72.8714	4.1219	TCGA-C5-A1M6-01
CESC(N=286)	47.4034	3.4635	TCGA-VS-A9V4-01
CESC(N=286)	42.8834	2.3019	TCGA-VS-A8Q8-01
CESC(N=286)	53.6712	2.9186	TCGA-DS-A0VN-01
CESC(N=286)	30.2482	3.8147	TCGA-MU-A8JM-01
CESC(N=286)	51.3027	3.7982	TCGA-C5-A2LY-01
CESC(N=286)	25.4422	3.8788	TCGA-FU-A23K-01
CESC(N=286)	58.4245	3.2781	TCGA-EA-A6QX-01
CESC(N=286)	53.321	3.4264	TCGA-C5-A7CH-01
CESC(N=286)	55.068	0.6425	TCGA-EK-A2RN-01
CESC(N=286)	48.1261	3.2781	TCGA-EK-A2RJ-01
CESC(N=286)	19.9581	2.4883	TCGA-C5-A1BM-01
CESC(N=286)	38.6765	4.7437	TCGA-Q1-A73R-01
CESC(N=286)	29.814	4.6983	TCGA-DS-A7WH-01
CESC(N=286)	61.4211	3.8749	TCGA-ZJ-AAX4-01
CESC(N=286)	48.4236	4.162	TCGA-C5-A7CK-01
CESC(N=286)	38.6311	3.5411	TCGA-VS-A8EK-01
CESC(N=286)	53.1291	3.1195	TCGA-EA-A1QS-01
CESC(N=286)	28.1566	4.5243	TCGA-FU-A3WB-01
CESC(N=286)	25.8484	3.2511	TCGA-FU-A3TQ-01
CESC(N=286)	46.0189	2.9966	TCGA-C5-A8XI-01
CESC(N=286)	30.8073	4.2274	TCGA-C5-A1BN-01
CESC(N=286)	25.7243	3.2328	TCGA-IR-A3LA-01
CESC(N=286)	41.78	4.0558	TCGA-VS-A94X-01
CESC(N=286)	49.42	2.7868	TCGA-MA-AA42-01
CESC(N=286)	47.701	3.0234	TCGA-C5-A8YQ-01
CESC(N=286)	49.7152	3.4739	TCGA-ZJ-AB0H-01
CESC(N=286)	49.0938	3.7646	TCGA-C5-A7X5-01
CESC(N=286)	64.2717	3.5547	TCGA-VS-A9U5-01
CESC(N=286)	41.7371	2.667	TCGA-C5-A1M7-01
CESC(N=286)	37.015	3.7432	TCGA-C5-A905-01
CESC(N=286)	45.8258	3.4384	TCGA-Q1-A5R2-01
CESC(N=286)	31.6288	4.2312	TCGA-EK-A3GJ-01
CESC(N=286)	54.8114	3.4674	TCGA-DG-A2KH-01
CESC(N=286)	55.3852	3.5124	TCGA-VS-A8EB-01
CESC(N=286)	35.9139	4.366	TCGA-LP-A4AX-01
CESC(N=286)	49.42	4.1161	TCGA-VS-A94Z-01
CESC(N=286)	49.0959	4.0696	TCGA-ZJ-AAXB-01
CESC(N=286)	73.508	2.0395	TCGA-C5-A1MQ-01
CESC(N=286)	40.0198	3.3206	TCGA-EX-A1H6-01
CESC(N=286)	49.5032	2.9356	TCGA-ZJ-AAXF-01
CESC(N=286)	55.6597	3.1717	TCGA-VS-A9UM-01
CESC(N=286)	47.3187	3.0358	TCGA-VS-A8EH-01
CESC(N=286)	38.2973	2.6302	TCGA-BI-A0VR-01
CESC(N=286)	25.6622	3.5911	TCGA-EA-A5FO-01
CESC(N=286)	27.574	2.2237	TCGA-DR-A0ZM-01
CESC(N=286)	46.4529	3.1228	TCGA-MA-AA43-01
CESC(N=286)	22.81	3.8391	TCGA-C5-A7UC-01
CESC(N=286)	66.5238	4.0304	TCGA-C5-A7XC-01
CESC(N=286)	48.7791	3.242	TCGA-VS-A8QH-01
CESC(N=286)	28.3572	3.3105	TCGA-LP-A5U3-01
CESC(N=286)	38.1874	3.2267	TCGA-EA-A3HT-01
CESC(N=286)	36.2705	4.1867	TCGA-IR-A3LC-01
CESC(N=286)	19.1303	3.5523	TCGA-FU-A770-01
CESC(N=286)	45.8246	4.4128	TCGA-VS-A8EC-01
CESC(N=286)	75.3067	3.3549	TCGA-4J-AA1J-01
CESC(N=286)	36.9491	3.652	TCGA-LP-A4AV-01
CESC(N=286)	24.5415	3.8601	TCGA-EK-A2RL-01
CESC(N=286)	44.1728	3.1604	TCGA-EK-A3GM-01
CESC(N=286)	59.3881	3.958	TCGA-VS-A9UC-01
CESC(N=286)	25.4682	4.248	TCGA-FU-A2QG-01
CESC(N=286)	36.203	2.828	TCGA-EK-A2PM-01
CESC(N=286)	31.5004	3.0859	TCGA-DS-A0VK-01
CESC(N=286)	45.8258	3.7389	TCGA-VS-A94W-01
CESC(N=286)	35.5215	3.1939	TCGA-C5-A1MK-01
CESC(N=286)	42.9739	3.4726	TCGA-C5-A1MH-01
CESC(N=286)	35.5106	3.8187	TCGA-C5-A0TN-01
CESC(N=286)	45.0449	3.3177	TCGA-VS-A9UI-01
CESC(N=286)	47.6738	3.772	TCGA-FU-A3TX-01
CESC(N=286)	59.6129	3.8511	TCGA-Q1-A6DV-01
CESC(N=286)	42.9926	3.5535	TCGA-C5-A1ML-01
CESC(N=286)	39.1952	2.7444	TCGA-VS-A8QM-01
CESC(N=286)	49.1188	2.2513	TCGA-RA-A741-01
CESC(N=286)	51.0072	2.5852	TCGA-VS-A954-01
CESC(N=286)	36.0081	2.6278	TCGA-XS-A8TJ-01
CESC(N=286)	38.1042	3.4156	TCGA-LP-A4AW-01
CESC(N=286)	26.5281	3.3148	TCGA-JW-A5VK-01
CESC(N=286)	33.6649	2.8301	TCGA-EK-A2H0-01
CESC(N=286)	31.77	4.0313	TCGA-EX-A449-01
CESC(N=286)	25.5821	2.5731	TCGA-C5-A902-01
CESC(N=286)	50.9827	3.2796	TCGA-MA-AA3X-01
CESC(N=286)	68.6389	3.3661	TCGA-C5-A7CO-01
CESC(N=286)	39.5333	3.4437	TCGA-C5-A2LV-01
CESC(N=286)	45.5972	3.325	TCGA-VS-A9UT-01
CESC(N=286)	42.9336	2.9984	TCGA-ZJ-AAX8-01
CESC(N=286)	59.7401	3.4437	TCGA-C5-A1BJ-01
LUAD(N=508)	40.6648	2.9911	TCGA-44-6778-01
LUAD(N=508)	46.2732	3.1079	TCGA-05-4420-01
LUAD(N=508)	41.1973	2.9674	TCGA-64-1679-01
LUAD(N=508)	55.1223	1.8404	TCGA-49-6744-01
LUAD(N=508)	32.3178	3.0859	TCGA-55-6982-01
LUAD(N=508)	38.239	1.2333	TCGA-NJ-A4YI-01
LUAD(N=508)	54.9997	3.6894	TCGA-73-4666-01
LUAD(N=508)	71.619	3.0585	TCGA-MN-A4N1-01
LUAD(N=508)	40.7096	3.1669	TCGA-55-7911-01
LUAD(N=508)	73.1673	1.3109	TCGA-55-A4DG-01
LUAD(N=508)	35.54	2.7205	TCGA-L9-A5IP-01
LUAD(N=508)	52.4769	3.1079	TCGA-73-4662-01
LUAD(N=508)	58.2883	1.8242	TCGA-55-6712-01
LUAD(N=508)	22.6476	2.3508	TCGA-97-7553-01
LUAD(N=508)	49.0861	3.8116	TCGA-49-AARE-01
LUAD(N=508)	26.6881	1.2147	TCGA-50-8460-01
LUAD(N=508)	45.4712	2.5585	TCGA-50-5933-01
LUAD(N=508)	31.7077	2.9655	TCGA-44-6774-01
LUAD(N=508)	53.4765	2.8838	TCGA-73-4670-01
LUAD(N=508)	54.4119	2.5313	TCGA-55-A48Z-01
LUAD(N=508)	47.5551	2.0218	TCGA-75-7031-01
LUAD(N=508)	71.1043	1.8918	TCGA-44-A47A-01
LUAD(N=508)	63.4608	3.0323	TCGA-05-4398-01
LUAD(N=508)	22.9781	0.8961	TCGA-67-3773-01
LUAD(N=508)	39.0495	2.3732	TCGA-64-5781-01
LUAD(N=508)	41.4843	1.7532	TCGA-97-7552-01
LUAD(N=508)	62.5987	2.1444	TCGA-49-AARN-01
LUAD(N=508)	42.7492	2.667	TCGA-44-3919-01
LUAD(N=508)	48.821	2.1313	TCGA-99-8032-01
LUAD(N=508)	26.8855	3.3759	TCGA-55-8299-01
LUAD(N=508)	55.6908	2.8838	TCGA-55-A491-01
LUAD(N=508)	60.9167	3.7204	TCGA-50-6595-01
LUAD(N=508)	60.641	3.0533	TCGA-95-A4VP-01
LUAD(N=508)	54.0259	3.074	TCGA-55-8302-01
LUAD(N=508)	34.2584	0.690953	TCGA-44-4112-01
LUAD(N=508)	47.1881	2.4144	TCGA-05-4430-01
LUAD(N=508)	46.4815	3.9819	TCGA-75-7027-01
LUAD(N=508)	39.3928	2.4252	TCGA-44-2668-01
LUAD(N=508)	55.9792	3.074	TCGA-55-8507-01
LUAD(N=508)	32.319	1.3735	TCGA-69-8254-01
LUAD(N=508)	46.4248	3.2189	TCGA-78-8640-01
LUAD(N=508)	54.1748	3.1876	TCGA-69-7979-01
LUAD(N=508)	51.7409	1.7954	TCGA-55-7573-01
LUAD(N=508)	41.6046	1.412	TCGA-49-4506-01
LUAD(N=508)	54.3572	2.4035	TCGA-05-4402-01
LUAD(N=508)	71.2489	2.6255	TCGA-44-8119-01
LUAD(N=508)	38.8819	2.3732	TCGA-55-7724-01
LUAD(N=508)	26.6983	2.0004	TCGA-44-6776-01
LUAD(N=508)	31.7116	1.7009	TCGA-49-4514-01
LUAD(N=508)	29.4011	2.874	TCGA-05-4396-01
LUAD(N=508)	30.2697	2.6602	TCGA-55-8204-01
LUAD(N=508)	34.8089	2.0569	TCGA-L4-A4E6-01
LUAD(N=508)	55.449	2.9729	TCGA-75-6205-01
LUAD(N=508)	48.3539	3.5645	TCGA-62-A46O-01
LUAD(N=508)	62.0487	5.2891	TCGA-78-7155-01
LUAD(N=508)	46.6709	2.5437	TCGA-62-A472-01
LUAD(N=508)	42.1098	2.1606	TCGA-NJ-A55R-01
LUAD(N=508)	62.7254	2.8014	TCGA-62-8395-01
LUAD(N=508)	54.3077	3.0893	TCGA-95-7567-01
LUAD(N=508)	56.9001	2.1988	TCGA-50-5051-01
LUAD(N=508)	46.0514	2.2901	TCGA-55-A48Y-01
LUAD(N=508)	46.4577	1.334	TCGA-86-A456-01
LUAD(N=508)	25.8756	0.6145	TCGA-50-5068-01
LUAD(N=508)	32.4153	1.9111	TCGA-NJ-A55A-01
LUAD(N=508)	39.1982	2.4701	TCGA-J2-A4AG-01
LUAD(N=508)	66.7314	2.1798	TCGA-05-4405-01
LUAD(N=508)	42.4438	2.3816	TCGA-50-5944-01
LUAD(N=508)	52.9243	3.1062	TCGA-86-7955-01
LUAD(N=508)	70.9033	2.004	TCGA-50-6673-01
LUAD(N=508)	57.997	3.2885	TCGA-55-7727-01
LUAD(N=508)	48.6861	2.5876	TCGA-55-8510-01
LUAD(N=508)	51.6664	3.0978	TCGA-MP-A4T8-01
LUAD(N=508)	66.3676	2.1574	TCGA-86-8279-01
LUAD(N=508)	55.9185	2.6208	TCGA-55-A494-01
LUAD(N=508)	51.3483	1.72944	TCGA-44-3917-01
LUAD(N=508)	58.9138	3.6486	TCGA-75-5125-01
LUAD(N=508)	67.5963	2.7139	TCGA-55-8615-01
LUAD(N=508)	57.9993	3.1844	TCGA-MP-A4TF-01
LUAD(N=508)	50.3137	2.5213	TCGA-55-6979-01
LUAD(N=508)	43.1956	2.6255	TCGA-86-A4JF-01
LUAD(N=508)	62.8431	2.5511	TCGA-86-7701-01
LUAD(N=508)	47.4432	3.3278	TCGA-62-8398-01
LUAD(N=508)	55.068	1.7489	TCGA-L9-A443-01
LUAD(N=508)	41.1641	3.0961	TCGA-78-8660-01
LUAD(N=508)	50.5676	2.8582	TCGA-78-7148-01
LUAD(N=508)	45.8899	2.2268	TCGA-67-6215-01
LUAD(N=508)	54.1719	1.9527	TCGA-55-A490-01
LUAD(N=508)	54.5271	2.409	TCGA-69-7974-01
LUAD(N=508)	43.4009	2.9186	TCGA-49-AAR4-01
LUAD(N=508)	35.7123	1.736	TCGA-05-4418-01
LUAD(N=508)	37.5859	2.7742	TCGA-35-4123-01
LUAD(N=508)	45.8523	2.7051	TCGA-55-6969-01
LUAD(N=508)	67.6601	2.7314	TCGA-91-8497-01
LUAD(N=508)	58.0641	2.0742	TCGA-62-A470-01
LUAD(N=508)	44.2891	2.9966	TCGA-53-A4EZ-01
LUAD(N=508)	52.0106	1.8404	TCGA-78-7162-01
LUAD(N=508)	34.8642	2.0395	TCGA-62-A46Y-01
LUAD(N=508)	56.6723	2.5634	TCGA-62-A46R-01
LUAD(N=508)	40.4345	2.8442	TCGA-05-4244-01
LUAD(N=508)	45.3745	2.7314	TCGA-L9-A8F4-01
LUAD(N=508)	45.5361	2.8838	TCGA-55-7726-01
LUAD(N=508)	69.2759	2.2753	TCGA-49-4512-01
LUAD(N=508)	45.4737	3.5547	TCGA-73-A9RS-01
LUAD(N=508)	45.6395	2.118	TCGA-MP-A4TD-01
LUAD(N=508)	49.2199	2.6805	TCGA-75-5147-01
LUAD(N=508)	40.7432	2.1798	TCGA-44-7671-01
LUAD(N=508)	57.1303	3.2677	TCGA-38-4631-01
LUAD(N=508)	39.4197	2.0742	TCGA-NJ-A55O-01
LUAD(N=508)	53.1105	2.7292	TCGA-75-6211-01
LUAD(N=508)	48.8317	1.7702	TCGA-05-5420-01
LUAD(N=508)	66.9049	3.9974	TCGA-55-1594-01
LUAD(N=508)	56.7337	3.992	TCGA-64-5774-01
LUAD(N=508)	54.7503	2.8641	TCGA-50-5941-01
LUAD(N=508)	50.401	2.43504	TCGA-44-2662-01
LUAD(N=508)	26.6405	1.4652	TCGA-97-A4M2-01
LUAD(N=508)	52.035	3.4224	TCGA-55-7995-01
LUAD(N=508)	51.2514	2.4225	TCGA-95-7043-01
LUAD(N=508)	41.786	2.3048	TCGA-NJ-A4YP-01
LUAD(N=508)	54.4884	0.9642	TCGA-97-A4M1-01
LUAD(N=508)	71.9497	1.5661	TCGA-78-7149-01
LUAD(N=508)	41.5128	3.2707	TCGA-MP-A4TC-01
LUAD(N=508)	27.4401	2.1411	TCGA-97-A4M5-01
LUAD(N=508)	43.5626	1.6374	TCGA-99-8028-01
LUAD(N=508)	66.9916	2.0218	TCGA-67-6217-01
LUAD(N=508)	54.2744	2.8936	TCGA-44-A47B-01
LUAD(N=508)	56.3789	2.0218	TCGA-38-4628-01
LUAD(N=508)	58.5327	3.66	TCGA-05-4250-01
LUAD(N=508)	28.5639	2.118	TCGA-67-3774-01
LUAD(N=508)	47.8552	2.727	TCGA-80-5608-01
LUAD(N=508)	62.8145	2.6647	TCGA-05-4389-01
LUAD(N=508)	39.3565	1.7617	TCGA-75-6203-01
LUAD(N=508)	51.994	3.2405	TCGA-55-6981-01
LUAD(N=508)	50.7205	2.6895	TCGA-55-7903-01
LUAD(N=508)	63.3939	2.9929	TCGA-62-8394-01
LUAD(N=508)	59.479	2.2513	TCGA-49-4488-01
LUAD(N=508)	22.2651	1.3283	TCGA-78-7537-01
LUAD(N=508)	63.0531	2.7073	TCGA-80-5611-01
LUAD(N=508)	81.5601	1.9264	TCGA-55-6972-01
LUAD(N=508)	38.2286	1.7403	TCGA-97-7941-01
LUAD(N=508)	49.6634	2.1862	TCGA-91-6840-01
LUAD(N=508)	50.8525	2.296	TCGA-69-7978-01
LUAD(N=508)	38.6224	1.9931	TCGA-50-5930-01
LUAD(N=508)	37.9194	2.7161	TCGA-93-8067-01
LUAD(N=508)	55.9059	2.7444	TCGA-44-A479-01
LUAD(N=508)	91.9	2.233	TCGA-55-8087-01
LUAD(N=508)	50.9711	2.8542	TCGA-86-6562-01
LUAD(N=508)	37.3646	2.1013	TCGA-05-4425-01
LUAD(N=508)	55.738	2.2113	TCGA-MP-A4SW-01
LUAD(N=508)	52.828	1.9895	TCGA-55-8512-01
LUAD(N=508)	33.6795	1.4547	TCGA-67-3770-01
LUAD(N=508)	54.048	3.7291	TCGA-50-6592-01
LUAD(N=508)	47.5768	3.1556	TCGA-55-6975-01
LUAD(N=508)	42.7619	1.0433	TCGA-S2-AA1A-01
LUAD(N=508)	41.5615	3.1588	TCGA-55-8511-01
LUAD(N=508)	69.5914	2.5061	TCGA-05-4434-01
LUAD(N=508)	55.1799	2.5011	TCGA-55-8092-01
LUAD(N=508)	38.9511	1.5216	TCGA-L9-A50W-01
LUAD(N=508)	37.9729	3.5535	TCGA-44-7661-01
LUAD(N=508)	36.1642	2.2813	TCGA-05-4426-01
LUAD(N=508)	46.346	3.2359	TCGA-05-4390-01
LUAD(N=508)	34.3262	1.3679	TCGA-64-5815-01
LUAD(N=508)	42.36	2.0183	TCGA-69-7761-01
LUAD(N=508)	53.4873	1.9601	TCGA-55-8301-01
LUAD(N=508)	49.42	1.4388	TCGA-44-A4SU-01
LUAD(N=508)	45.3501	2.4857	TCGA-69-7765-01
LUAD(N=508)	22.6181	2.7636	TCGA-05-4433-01
LUAD(N=508)	49.7349	1.736	TCGA-55-8508-01
LUAD(N=508)	38.9938	2.8858	TCGA-50-5044-01
LUAD(N=508)	29.652	2.3898	TCGA-05-4384-01
LUAD(N=508)	40.703	2.6067	TCGA-O1-A52J-01
LUAD(N=508)	52.9696	3.4984	TCGA-78-7220-01
LUAD(N=508)	29.628	2.5536	TCGA-05-4422-01
LUAD(N=508)	57.4395	3.4765	TCGA-44-6779-01
LUAD(N=508)	60.4056	2.7183	TCGA-86-8672-01
LUAD(N=508)	52.228	2.0218	TCGA-55-6983-01
LUAD(N=508)	58.3903	3.3952	TCGA-91-8499-01
LUAD(N=508)	58.3647	4.3492	TCGA-91-6836-01
LUAD(N=508)	33.0211	1.3623	TCGA-38-7271-01
LUAD(N=508)	57.5993	1.4962	TCGA-NJ-A4YG-01
LUAD(N=508)	42.36	1.9264	TCGA-73-4658-01
LUAD(N=508)	24.1073	1.4911	TCGA-86-8076-01
LUAD(N=508)	48.4114	1.9377	TCGA-55-6987-01
LUAD(N=508)	41.3514	1.5013	TCGA-78-7152-01
LUAD(N=508)	58.1808	1.7229	TCGA-55-8096-01
LUAD(N=508)	50.7852	2.4386	TCGA-75-5122-01
LUAD(N=508)	31.9693	3.4318	TCGA-50-5931-01
LUAD(N=508)	40.0004	2.8858	TCGA-49-AARO-01
LUAD(N=508)	34.3332	2.2603	TCGA-44-2655-01
LUAD(N=508)	51.6258	2.4359	TCGA-73-4668-01
LUAD(N=508)	62.3431	3.8769	TCGA-91-6831-01
LUAD(N=508)	56.0578	2.081	TCGA-L9-A444-01
LUAD(N=508)	59.3841	2.6441	TCGA-05-5425-01
LUAD(N=508)	38.4959	2.51373	TCGA-44-6775-01
LUAD(N=508)	59.7579	1.1577	TCGA-75-7025-01
LUAD(N=508)	43.1555	1.6695	TCGA-05-5429-01
LUAD(N=508)	32.2252	2.0878	TCGA-99-7458-01
LUAD(N=508)	35.2615	2.7379	TCGA-97-7546-01
LUAD(N=508)	74.8788	0.8568	TCGA-67-3772-01
LUAD(N=508)	53.8611	2.362	TCGA-05-4395-01
LUAD(N=508)	62.7254	1.7273	TCGA-91-7771-01
LUAD(N=508)	32.4593	1.6187	TCGA-55-6984-01
LUAD(N=508)	53.9971	1.71416	TCGA-44-3918-01
LUAD(N=508)	37.3856	1.7828	TCGA-50-8459-01
LUAD(N=508)	68.4216	3.4752	TCGA-69-7980-01
LUAD(N=508)	33.2761	2.8055	TCGA-50-5939-01
LUAD(N=508)	37.065	2.7029	TCGA-75-5126-01
LUAD(N=508)	35.1854	3.6428	TCGA-50-6594-01
LUAD(N=508)	32.869	2.9013	TCGA-MP-A5C7-01
LUAD(N=508)	34.4994	1.56281	TCGA-44-5645-01
LUAD(N=508)	48.8803	1.8564	TCGA-50-5935-01
LUAD(N=508)	38.108	2.3337	TCGA-55-7914-01
LUAD(N=508)	64.7729	3.1409	TCGA-55-7576-01
LUAD(N=508)	79.7807	1.22713	TCGA-44-2666-01
LUAD(N=508)	42.9985	2.5707	TCGA-55-7284-01
LUAD(N=508)	33.3585	2.7073	TCGA-73-4676-01
LUAD(N=508)	24.4193	1.3225	TCGA-78-7166-01
LUAD(N=508)	45.89	4.0688	TCGA-83-5908-01
LUAD(N=508)	44.7577	2.3337	TCGA-50-5049-01
LUAD(N=508)	41.492	2.8096	TCGA-44-3396-01
LUAD(N=508)	44.9729	1.8201	TCGA-97-8172-01
LUAD(N=508)	64.9394	2.0878	TCGA-50-6597-01
LUAD(N=508)	55.2939	3.9022	TCGA-69-8255-01
LUAD(N=508)	45.8436	2.2391	TCGA-62-A46U-01
LUAD(N=508)	36.7841	3.2766	TCGA-97-8176-01
LUAD(N=508)	50.9406	4.9732	TCGA-86-8358-01
LUAD(N=508)	34.4187	4.2548	TCGA-05-4415-01
LUAD(N=508)	46.6727	1.683	TCGA-55-7281-01
LUAD(N=508)	59.304	1.9073	TCGA-78-7161-01
LUAD(N=508)	49.3496	2.7095	TCGA-49-4507-01
LUAD(N=508)	42.9922	2.118	TCGA-55-8621-01
LUAD(N=508)	39.6312	2.7205	TCGA-55-6970-01
LUAD(N=508)	40.0691	2.7227	TCGA-75-6207-01
LUAD(N=508)	50.3809	4.149	TCGA-55-8205-01
LUAD(N=508)	39.1952	2.4279	TCGA-69-7763-01
LUAD(N=508)	51.3613	3.3717	TCGA-55-7913-01
LUAD(N=508)	58.4225	0.688	TCGA-62-8397-01
LUAD(N=508)	49.5162	3.0706	TCGA-73-4659-01
LUAD(N=508)	54.1517	2.7205	TCGA-91-A4BC-01
LUAD(N=508)	35.5281	2.5188	TCGA-97-8547-01
LUAD(N=508)	47.6469	2.6647	TCGA-97-8175-01
LUAD(N=508)	67.0383	2.5972	TCGA-86-8075-01
LUAD(N=508)	39.1952	2.5363	TCGA-55-6985-01
LUAD(N=508)	40.2812	2.5288	TCGA-55-A48X-01
LUAD(N=508)	37.9412	1.0779	TCGA-44-2657-01
LUAD(N=508)	55.5975	2.9413	TCGA-95-7562-01
LUAD(N=508)	32.2304	0.8647	TCGA-55-7725-01
LUAD(N=508)	48.037	2.5972	TCGA-69-A59K-01
LUAD(N=508)	29.652	2.1734	TCGA-05-5715-01
LUAD(N=508)	65.8933	1.9302	TCGA-55-A492-01
LUAD(N=508)	42.3238	3.4907	TCGA-78-7145-01
LUAD(N=508)	37.8887	2.4117	TCGA-86-8278-01
LUAD(N=508)	50.6918	3.3814	TCGA-MN-A4N5-01
LUAD(N=508)	35.6221	2.0465	TCGA-64-5778-01
LUAD(N=508)	56.48	2.7183	TCGA-J2-8194-01
LUAD(N=508)	33.2511	2.4359	TCGA-55-A57B-01
LUAD(N=508)	29.0128	2.0912	TCGA-38-4627-01
LUAD(N=508)	32.7381	3.9213	TCGA-86-7711-01
LUAD(N=508)	56.9884	1.0642	TCGA-05-5423-01
LUAD(N=508)	77.6701	0.6425	TCGA-91-8496-01
LUAD(N=508)	47.7289	2.1957	TCGA-86-8280-01
LUAD(N=508)	20.9542	1.51649	TCGA-44-6146-01
LUAD(N=508)	51.4558	4.2419	TCGA-78-7146-01
LUAD(N=508)	50.7077	2.4857	TCGA-35-4122-01
LUAD(N=508)	34.5486	2.1766	TCGA-78-8648-01
LUAD(N=508)	48.5939	3.637	TCGA-86-7953-01
LUAD(N=508)	43.8667	3.5287	TCGA-44-5643-01
LUAD(N=508)	45.0485	2.3308	TCGA-73-7498-01
LUAD(N=508)	59.8242	3.2174	TCGA-75-6214-01
LUAD(N=508)	55.3601	1.787	TCGA-93-7348-01
LUAD(N=508)	51.3635	1.9822	TCGA-97-8174-01
LUAD(N=508)	47.583	3.4304	TCGA-55-8620-01
LUAD(N=508)	46.4618	4.5392	TCGA-62-8399-01
LUAD(N=508)	25.8947	2.6185	TCGA-80-5607-01
LUAD(N=508)	25.8847	2.081	TCGA-49-AAR2-01
LUAD(N=508)	41.9116	1.884	TCGA-55-6543-01
LUAD(N=508)	71.5274	1.3109	TCGA-49-4501-01
LUAD(N=508)	39.7646	1.4494	TCGA-78-7156-01
LUAD(N=508)	35.8945	2.2082	TCGA-62-A46S-01
LUAD(N=508)	57.7326	2.7357	TCGA-49-AARQ-01
LUAD(N=508)	68.2955	3.2707	TCGA-93-A4JN-01
LUAD(N=508)	80.6101	3.5994	TCGA-91-6847-01
LUAD(N=508)	50.1017	2.5036	TCGA-55-6642-01
LUAD(N=508)	37.065	2.4779	TCGA-55-8203-01
LUAD(N=508)	45.8043	3.9185	TCGA-44-7670-01
LUAD(N=508)	49.5936	2.1541	TCGA-MP-A4TJ-01
LUAD(N=508)	75.2956	1.5316	TCGA-38-6178-01
LUAD(N=508)	67.07	2.6783	TCGA-86-8074-01
LUAD(N=508)	84.72	2.2019	TCGA-55-8616-01
LUAD(N=508)	25.8767	1.2271	TCGA-97-A4M0-01
LUAD(N=508)	54.3595	2.8936	TCGA-49-6767-01
LUAD(N=508)	60.01	2.9544	TCGA-55-1595-01
LUAD(N=508)	26.1635	1.8801	TCGA-49-AARR-01
LUAD(N=508)	49.8558	3.074	TCGA-MP-A4T9-01
LUAD(N=508)	47.0584	0.848796	TCGA-44-6147-01
LUAD(N=508)	38.6534	2.7073	TCGA-86-8073-01
LUAD(N=508)	70.8082	1.9377	TCGA-MN-A4N4-01
LUAD(N=508)	31.77	1.9377	TCGA-97-A4M3-01
LUAD(N=508)	29.2942	1.8762	TCGA-86-7714-01
LUAD(N=508)	51.7185	3.2811	TCGA-49-4487-01
LUAD(N=508)	56.436	3.3421	TCGA-78-7542-01
LUAD(N=508)	24.8965	2.8301	TCGA-95-A4VK-01
LUAD(N=508)	58.5476	3.3633	TCGA-55-7994-01
LUAD(N=508)	58.0592	3.242	TCGA-49-6742-01
LUAD(N=508)	66.4523	2.2543	TCGA-MP-A4T6-01
LUAD(N=508)	50.4547	2.4439	TCGA-55-8506-01
LUAD(N=508)	37.9714	3.5022	TCGA-MP-A4TA-01
LUAD(N=508)	72.8991	1.7912	TCGA-55-8091-01
LUAD(N=508)	53.3027	2.7139	TCGA-91-6828-01
LUAD(N=508)	65.0898	1.2023	TCGA-35-5375-01
LUAD(N=508)	45.244	1.787	TCGA-97-A4M7-01
LUAD(N=508)	51.745	2.2723	TCGA-78-7539-01
LUAD(N=508)	37.6089	1.9638	TCGA-J2-8192-01
LUAD(N=508)	47.317	3.6195	TCGA-86-7713-01
LUAD(N=508)	57.4886	2.1574	TCGA-67-6216-01
LUAD(N=508)	41.9344	2.2842	TCGA-44-A47G-01
LUAD(N=508)	44.78	2.236	TCGA-55-7816-01
LUAD(N=508)	49.9146	2.6278	TCGA-78-7147-01
LUAD(N=508)	33.5643	1.5465	TCGA-44-3398-01
LUAD(N=508)	22.8744	2.5996	TCGA-78-7633-01
LUAD(N=508)	54.0647	2.328	TCGA-78-7535-01
LUAD(N=508)	32.3464	2.2051	TCGA-86-8671-01
LUAD(N=508)	47.222	2.9243	TCGA-91-6835-01
LUAD(N=508)	29.4256	1.6187	TCGA-35-3615-01
LUAD(N=508)	60.7837	1.0293	TCGA-55-6980-01
LUAD(N=508)	34.9563	3.4752	TCGA-50-5936-01
LUAD(N=508)	36.7458	1.8119	TCGA-73-4675-01
LUAD(N=508)	26.2896	3.0995	TCGA-50-5932-01
LUAD(N=508)	33.5683	2.2019	TCGA-93-A4JO-01
LUAD(N=508)	41.125	2.2543	TCGA-49-AAR3-01
LUAD(N=508)	64.4283	3.1637	TCGA-78-7154-01
LUAD(N=508)	53.2802	2.9394	TCGA-55-7910-01
LUAD(N=508)	58.4436	2.1734	TCGA-4B-A93V-01
LUAD(N=508)	16.944	0.8805	TCGA-91-6849-01
LUAD(N=508)	37.4394	2.1957	TCGA-MP-A4SY-01
LUAD(N=508)	74.467	3.0358	TCGA-MP-A4SV-01
LUAD(N=508)	11.7909	1.7786	TCGA-55-8513-01
LUAD(N=508)	44.3356	2.8602	TCGA-MP-A4T4-01
LUAD(N=508)	56.3199	3.2557	TCGA-71-8520-01
LUAD(N=508)	50.903	2.4035	TCGA-44-7672-01
LUAD(N=508)	45.0164	2.7931	TCGA-50-6593-01
LUAD(N=508)	38.5476	3.8431	TCGA-69-7973-01
LUAD(N=508)	54.5205	3.1129	TCGA-67-3771-01
LUAD(N=508)	43.5857	3.1278	TCGA-99-8033-01
LUAD(N=508)	61.2796	4.4706	TCGA-91-6848-01
LUAD(N=508)	35.1395	2.8661	TCGA-93-A4JP-01
LUAD(N=508)	32.2005	1.2815	TCGA-38-A44F-01
LUAD(N=508)	65.5381	2.9747	TCGA-44-7660-01
LUAD(N=508)	72.1941	2.3592	TCGA-69-7760-01
LUAD(N=508)	63.4876	2.7508	TCGA-69-7764-01
LUAD(N=508)	47.9042	0.769215	TCGA-44-2665-01
LUAD(N=508)	47.4432	3.4331	TCGA-55-8505-01
LUAD(N=508)	27.2398	3.3192	TCGA-95-7944-01
LUAD(N=508)	53.0239	3.4156	TCGA-L9-A7SV-01
LUAD(N=508)	37.3576	3.3675	TCGA-55-8089-01
LUAD(N=508)	50.4851	2.7784	TCGA-55-7283-01
LUAD(N=508)	49.1439	2.3366	TCGA-44-8117-01
LUAD(N=508)	34.7484	2.4831	TCGA-53-7626-01
LUAD(N=508)	42.627	2.5487	TCGA-86-8673-01
LUAD(N=508)	46.8106	3.1145	TCGA-95-8494-01
LUAD(N=508)	33.0963	1.2023	TCGA-97-8171-01
LUAD(N=508)	48.8769	2.2421	TCGA-50-7109-01
LUAD(N=508)	32.0066	2.7993	TCGA-44-6145-01
LUAD(N=508)	31.4127	2.3953	TCGA-55-8085-01
LUAD(N=508)	58.178	2.1541	TCGA-NJ-A4YF-01
LUAD(N=508)	62.3927	1.46	TCGA-NJ-A7XG-01
LUAD(N=508)	21.6529	1.4494	TCGA-05-4403-01
LUAD(N=508)	64.1111	1.9601	TCGA-55-8097-01
LUAD(N=508)	34.8847	2.5462	TCGA-NJ-A4YQ-01
LUAD(N=508)	55.3568	2.0535	TCGA-97-7547-01
LUAD(N=508)	49.6747	3.551	TCGA-55-5899-01
LUAD(N=508)	27.6165	4.5224	TCGA-05-4397-01
LUAD(N=508)	44.8337	1.9034	TCGA-44-6777-01
LUAD(N=508)	49.4498	2.7227	TCGA-55-7815-01
LUAD(N=508)	35.3802	2.2633	TCGA-91-6830-01
LUAD(N=508)	45.4169	2.8974	TCGA-44-A4SS-01
LUAD(N=508)	28.7702	1.0779	TCGA-44-7659-01
LUAD(N=508)	52.1875	1.7229	TCGA-53-7813-01
LUAD(N=508)	50.3665	2.6487	TCGA-05-4382-01
LUAD(N=508)	42.6068	2.4225	TCGA-93-A4JQ-01
LUAD(N=508)	56.3388	2.4492	TCGA-05-5428-01
LUAD(N=508)	50.3762	1.9601	TCGA-55-6986-01
LUAD(N=508)	66.0602	1.0007	TCGA-91-A4BD-01
LUAD(N=508)	43.1174	1.7489	TCGA-50-5066-01
LUAD(N=508)	42.2029	4.1716	TCGA-49-AAR9-01
LUAD(N=508)	43.9959	2.9488	TCGA-55-7907-01
LUAD(N=508)	49.773	2.9109	TCGA-95-7039-01
LUAD(N=508)	69.4808	2.2813	TCGA-64-1680-01
LUAD(N=508)	73.6048	1.6466	TCGA-J2-A4AE-01
LUAD(N=508)	50.8896	2.9394	TCGA-86-8359-01
LUAD(N=508)	55.0556	3.2205	TCGA-55-8614-01
LUAD(N=508)	36.7762	2.1862	TCGA-55-7574-01
LUAD(N=508)	59.8017	2.6208	TCGA-44-5644-01
LUAD(N=508)	38.3797	3.2251	TCGA-MP-A4TI-01
LUAD(N=508)	46.0117	2.0465	TCGA-95-7948-01
LUAD(N=508)	42.1193	1.8363	TCGA-73-4677-01
LUAD(N=508)	51.4494	1.4756	TCGA-50-5942-01
LUAD(N=508)	51.4355	1.9638	TCGA-78-7167-01
LUAD(N=508)	59.6674	3.1987	TCGA-78-8662-01
LUAD(N=508)	54.5343	2.7357	TCGA-86-8585-01
LUAD(N=508)	93.9968	4.4149	TCGA-50-6591-01
LUAD(N=508)	51.1125	2.7095	TCGA-MP-A4TK-01
LUAD(N=508)	32.6872	4.4324	TCGA-55-7570-01
LUAD(N=508)	59.3897	0.605	TCGA-78-7163-01
LUAD(N=508)	47.1908	2.667	TCGA-05-4417-01
LUAD(N=508)	36.8973	2.0604	TCGA-78-8655-01
LUAD(N=508)	51.8825	2.081	TCGA-97-7554-01
LUAD(N=508)	55.4353	1.8323	TCGA-49-4505-01
LUAD(N=508)	86.112	2.676	TCGA-86-8669-01
LUAD(N=508)	51.5971	2.7993	TCGA-55-8208-01
LUAD(N=508)	53.8962	3.0568	TCGA-75-6206-01
LUAD(N=508)	42.4825	2.2813	TCGA-55-6971-01
LUAD(N=508)	61.5582	2.1147	TCGA-05-4410-01
LUAD(N=508)	47.2349	1.2333	TCGA-55-8207-01
LUAD(N=508)	54.7917	2.40494	TCGA-38-4625-01
[truncated: 8,987 more rows]

## Sheet: MSI
Table S4. The correlation of CENPO expression with MSI in multiple types of cancers.
cancer	MSI	Expression	SampleName
GBM(N=151)	0.4705	3.9261	TCGA-19-1787-01
GBM(N=151)	0.2833	3.0056	TCGA-06-5412-01
GBM(N=151)	0.2592	3.5923	TCGA-12-5299-01
GBM(N=151)	0.2816	3.7529	TCGA-06-2565-01
GBM(N=151)	0.2728	3.3192	TCGA-06-2561-01
GBM(N=151)	0.2707	2.2082	TCGA-06-0132-01
GBM(N=151)	0.2804	3.9232	TCGA-19-2629-01
GBM(N=151)	0.2807	2.9356	TCGA-06-0238-01
GBM(N=151)	0.2779	2.651	TCGA-06-0749-01
GBM(N=151)	0.2931	4.5547	TCGA-06-0174-01
GBM(N=151)	0.2903	2.2482	TCGA-06-5410-01
GBM(N=151)	0.2642	3.1195	TCGA-28-2513-01
GBM(N=151)	0.2712	3.4224	TCGA-76-4929-01
GBM(N=151)	0.2765	2.876	TCGA-06-0645-01
GBM(N=151)	0.2856	4.6236	TCGA-32-2634-01
GBM(N=151)	0.2717	2.7508	TCGA-06-0141-01
GBM(N=151)	0.2673	4.1571	TCGA-06-0125-01
GBM(N=151)	0.2846	1.8484	TCGA-26-1442-01
GBM(N=151)	0.2724	3.0706	TCGA-26-5136-01
GBM(N=151)	0.2674	3.6089	TCGA-14-1034-01
GBM(N=151)	0.2727	2.7336	TCGA-06-0184-01
GBM(N=151)	0.2635	3.3206	TCGA-12-3652-01
GBM(N=151)	0.2662	3.9956	TCGA-76-4927-01
GBM(N=151)	0.2679	3.6393	TCGA-14-0790-01
GBM(N=151)	0.26	3.5047	TCGA-26-5132-01
GBM(N=151)	0.2639	4.0748	TCGA-76-4932-01
GBM(N=151)	0.2791	4.17	TCGA-32-1970-01
GBM(N=151)	0.2722	3.0757	TCGA-06-0219-01
GBM(N=151)	0.2753	3.9774	TCGA-14-0787-01
GBM(N=151)	0.2702	4.1136	TCGA-12-0618-01
GBM(N=151)	0.2698	3.9031	TCGA-27-2524-01
GBM(N=151)	0.2734	3.9783	TCGA-08-0386-01
GBM(N=151)	0.2825	3.7443	TCGA-06-0190-01
GBM(N=151)	0.2711	3.7432	TCGA-06-0745-01
GBM(N=151)	0.2701	3.83	TCGA-26-5135-01
GBM(N=151)	0.2781	3.3235	TCGA-41-3915-01
GBM(N=151)	0.2721	2.8916	TCGA-27-1831-01
GBM(N=151)	0.2622	4.5559	TCGA-28-1753-01
GBM(N=151)	0.2794	4.748	TCGA-12-5295-01
GBM(N=151)	0.2783	4.4027	TCGA-28-5204-01
GBM(N=151)	0.3081	4.5946	TCGA-06-2569-01
GBM(N=151)	0.2786	3.4304	TCGA-27-1830-01
GBM(N=151)	0.2742	4.7377	TCGA-06-2559-01
GBM(N=151)	0.263	1.5806	TCGA-06-0139-01
GBM(N=151)	0.2712	2.6624	TCGA-27-2526-01
GBM(N=151)	0.2914	3.8085	TCGA-06-5856-01
GBM(N=151)	0.2713	3.4264	TCGA-06-5418-01
GBM(N=151)	0.268	3.8054	TCGA-06-5414-01
GBM(N=151)	0.2709	3.8501	TCGA-06-5417-01
GBM(N=151)	0.2619	1.9452	TCGA-26-5134-01
GBM(N=151)	0.2739	4.5644	TCGA-76-4925-01
GBM(N=151)	0.289	3.66	TCGA-28-2510-01
GBM(N=151)	0.2839	4.1044	TCGA-06-5413-01
GBM(N=151)	0.2839	4.1368	TCGA-06-0646-01
GBM(N=151)	0.2745	4.701	TCGA-12-3650-01
GBM(N=151)	0.2723	3.9213	TCGA-12-0616-01
GBM(N=151)	0.2688	4.6236	TCGA-28-5215-01
GBM(N=151)	0.2739	2.8799	TCGA-19-2620-01
GBM(N=151)	0.2809	3.6312	TCGA-16-0846-01
GBM(N=151)	0.2642	3.6054	TCGA-02-0047-01
GBM(N=151)	0.2806	4.7033	TCGA-19-2624-01
GBM(N=151)	0.2687	3.0217	TCGA-32-1982-01
GBM(N=151)	0.2676	3.6289	TCGA-27-1835-01
GBM(N=151)	0.2796	3.1393	TCGA-06-0747-01
GBM(N=151)	0.2655	3.2297	TCGA-28-5220-01
GBM(N=151)	0.2746	3.1701	TCGA-14-0817-01
GBM(N=151)	0.2611	3.7709	TCGA-06-2570-01
GBM(N=151)	0.2857	3.8033	TCGA-41-4097-01
GBM(N=151)	0.2679	4.34242	TCGA-06-0211-01
GBM(N=151)	0.2721	4.3133	TCGA-02-2483-01
GBM(N=151)	0.2719	4.7154	TCGA-76-4931-01
GBM(N=151)	0.2726	4.215	TCGA-27-2523-01
GBM(N=151)	0.2742	3.9204	TCGA-27-1837-01
GBM(N=151)	0.2839	3.0927	TCGA-06-0744-01
GBM(N=151)	0.2667	2.7679	TCGA-06-0750-01
GBM(N=151)	0.258	3.3717	TCGA-32-5222-01
GBM(N=151)	0.2674	3.3364	TCGA-27-2519-01
GBM(N=151)	0.2969	3.8085	TCGA-12-0821-01
GBM(N=151)	0.2909	4.2795	TCGA-19-2619-01
GBM(N=151)	0.2888	3.6497	TCGA-12-0619-01
GBM(N=151)	0.274	2.6325	TCGA-28-5213-01
GBM(N=151)	0.2756	2.7721	TCGA-14-0789-01
GBM(N=151)	0.2631	4.3111	TCGA-28-5209-01
GBM(N=151)	0.2892	4.0567	TCGA-28-5218-01
GBM(N=151)	0.261	4.0064	TCGA-28-2514-01
GBM(N=151)	0.3054	4.5142	TCGA-06-5859-01
GBM(N=151)	0.2915	3.7204	TCGA-28-2509-01
GBM(N=151)	0.2743	4.7198	TCGA-14-1825-01
GBM(N=151)	0.3315	3.3842	TCGA-19-4065-01
GBM(N=151)	0.2728	3.6172	TCGA-02-2485-01
GBM(N=151)	0.279	3.6254	TCGA-12-1597-01
GBM(N=151)	0.2715	4.0375	TCGA-28-1747-01
GBM(N=151)	0.2863	2.5313	TCGA-28-2499-01
GBM(N=151)	0.2803	2.9618	TCGA-06-0649-01
GBM(N=151)	0.2692	4.2312	TCGA-06-2564-01
GBM(N=151)	0.2961	4.0584	TCGA-06-5408-01
GBM(N=151)	0.2741	3.1162	TCGA-27-1832-01
GBM(N=151)	0.2721	2.694	TCGA-14-1829-01
GBM(N=151)	0.2767	3.0234	TCGA-32-2615-01
GBM(N=151)	0.2707	4.0001	TCGA-06-0158-01
GBM(N=151)	0.2652	3.9506	TCGA-06-2558-01
GBM(N=151)	0.2729	3.6405	TCGA-28-5216-01
GBM(N=151)	0.2799	3.4517	TCGA-28-5207-01
GBM(N=151)	0.2819	3.2929	TCGA-41-2572-01
GBM(N=151)	0.2763	3.0757	TCGA-06-0130-01
GBM(N=151)	0.2849	3.9232	TCGA-06-5416-01
GBM(N=151)	0.274	3.863	TCGA-06-0168-01
GBM(N=151)	0.2745	2.2421	TCGA-02-0055-01
GBM(N=151)	0.2682	3.9022	TCGA-06-5415-01
GBM(N=151)	0.2943	3.5362	TCGA-06-5411-01
GBM(N=151)	0.2619	3.5461	TCGA-26-5139-01
GBM(N=151)	0.2737	3.0038	TCGA-76-4928-01
GBM(N=151)	0.2763	3.9496	TCGA-06-0644-01
GBM(N=151)	0.2899	4.178	TCGA-14-0871-01
GBM(N=151)	0.2716	3.2557	TCGA-32-2632-01
GBM(N=151)	0.2696	3.2885	TCGA-06-0882-01
GBM(N=151)	0.2834	2.8838	TCGA-19-2625-01
GBM(N=151)	0.2972	3.1344	TCGA-32-1980-01
GBM(N=151)	0.2731	4.1011	TCGA-27-1834-01
GBM(N=151)	0.2728	3.0842	TCGA-41-2571-01
GBM(N=151)	0.2925	2.5363	TCGA-14-0781-01
GBM(N=151)	0.2759	4.2266	TCGA-06-0157-01
GBM(N=151)	0.2826	4.4108	TCGA-12-3653-01
GBM(N=151)	0.2626	4.0807	TCGA-76-4926-01
GBM(N=151)	0.2808	4.2781	TCGA-26-5133-01
GBM(N=151)	0.2614	3.1442	TCGA-06-2562-01
GBM(N=151)	0.2704	3.1908	TCGA-27-2521-01
GBM(N=151)	0.3173	4.382	TCGA-41-5651-01
GBM(N=151)	0.2695	2.376	TCGA-06-0210-01
GBM(N=151)	0.2954	4.613	TCGA-19-5960-01
GBM(N=151)	0.2763	4.1772	TCGA-06-0686-01
GBM(N=151)	0.2704	3.7982	TCGA-06-2563-01
GBM(N=151)	0.29	3.6347	TCGA-15-1444-01
GBM(N=151)	0.2788	2.183	TCGA-32-4213-01
GBM(N=151)	0.2727	3.928	TCGA-15-0742-01
GBM(N=151)	0.3894	3.5237	TCGA-06-0187-01
GBM(N=151)	0.2907	5.1879	TCGA-19-1390-01
GBM(N=151)	0.2881	3.6184	TCGA-06-2557-01
GBM(N=151)	0.267	3.5035	TCGA-06-0878-01
GBM(N=151)	0.2758	4.5293	TCGA-06-0129-01
GBM(N=151)	0.2652	2.9857	TCGA-16-1045-01
GBM(N=151)	0.2749	4.546	TCGA-06-2567-01
GBM(N=151)	0.321	3.5863	TCGA-32-2616-01
GBM(N=151)	0.2613	3.958	TCGA-28-5208-01
GBM(N=151)	0.2911	4.0091	TCGA-06-1804-01
GBM(N=151)	0.2618	3.0038	TCGA-14-2554-01
GBM(N=151)	0.2737	4.2706	TCGA-27-2528-01
GBM(N=151)	0.3491	4.3053	TCGA-06-5858-01
GBM(N=151)	0.2721	2.108	TCGA-06-0178-01
GBM(N=151)	0.2769	2.05	TCGA-14-1823-01
GBM(N=151)	0.2901	2.7763	TCGA-06-0743-01
GBMLGG(N=657)	0.4705	3.9261	TCGA-19-1787-01
GBMLGG(N=657)	0.3226	2.8819	TCGA-S9-A7J2-01
GBMLGG(N=657)	0.3294	5.1065	TCGA-E1-A7YI-01
GBMLGG(N=657)	0.2833	3.0056	TCGA-06-5412-01
GBMLGG(N=657)	0.3434	3.3717	TCGA-DU-7302-01
GBMLGG(N=657)	0.331	3.1987	TCGA-DU-A7TI-01
GBMLGG(N=657)	0.2592	3.5923	TCGA-12-5299-01
GBMLGG(N=657)	0.3291	2.043	TCGA-P5-A5EX-01
GBMLGG(N=657)	0.3059	3.2826	TCGA-HT-8563-01
GBMLGG(N=657)	0.3046	3.0074	TCGA-FG-A60K-01
GBMLGG(N=657)	0.2816	3.7529	TCGA-06-2565-01
GBMLGG(N=657)	0.2728	3.3192	TCGA-06-2561-01
GBMLGG(N=657)	0.2936	3.7291	TCGA-CS-5397-01
GBMLGG(N=657)	0.2614	3.5337	TCGA-E1-5322-01
GBMLGG(N=657)	0.3126	2.233	TCGA-HT-8558-01
GBMLGG(N=657)	0.2927	2.3816	TCGA-S9-A6U8-01
GBMLGG(N=657)	0.3046	2.2051	TCGA-HT-7854-01
GBMLGG(N=657)	0.3082	2.7073	TCGA-HT-7467-01
GBMLGG(N=657)	0.3173	2.7826	TCGA-HT-7874-01
GBMLGG(N=657)	0.3293	2.9469	TCGA-S9-A6TV-01
GBMLGG(N=657)	0.3279	4.0348	TCGA-VM-A8CD-01
GBMLGG(N=657)	0.2707	2.2082	TCGA-06-0132-01
GBMLGG(N=657)	0.3365	2.8034	TCGA-HT-7616-01
GBMLGG(N=657)	0.3216	4.6294	TCGA-KT-A7W1-01
GBMLGG(N=657)	0.3259	2.9167	TCGA-P5-A5F2-01
GBMLGG(N=657)	0.2804	3.9232	TCGA-19-2629-01
GBMLGG(N=657)	0.3408	3.2174	TCGA-HT-7607-01
GBMLGG(N=657)	0.2807	2.9356	TCGA-06-0238-01
GBMLGG(N=657)	0.3182	3.3379	TCGA-HT-7873-01
GBMLGG(N=657)	0.2779	2.651	TCGA-06-0749-01
GBMLGG(N=657)	0.3088	1.7316	TCGA-HT-7603-01
GBMLGG(N=657)	0.2945	3.1604	TCGA-DB-A64P-01
GBMLGG(N=657)	0.2931	4.5547	TCGA-06-0174-01
GBMLGG(N=657)	0.2981	2.9148	TCGA-HW-7486-01
GBMLGG(N=657)	0.3352	2.3816	TCGA-P5-A5F1-01
GBMLGG(N=657)	0.3028	1.6649	TCGA-DU-7011-01
GBMLGG(N=657)	0.3367	2.8602	TCGA-P5-A77X-01
GBMLGG(N=657)	0.3079	3.1669	TCGA-HW-7493-01
GBMLGG(N=657)	0.3185	1.9786	TCGA-VM-A8CA-01
GBMLGG(N=657)	0.3113	2.5036	TCGA-DU-7015-01
GBMLGG(N=657)	0.3282	2.7951	TCGA-TM-A7C5-01
GBMLGG(N=657)	0.2975	3.002	TCGA-DU-8162-01
GBMLGG(N=657)	0.3239	2.6464	TCGA-TM-A84O-01
GBMLGG(N=657)	0.2903	2.2482	TCGA-06-5410-01
GBMLGG(N=657)	0.3032	2.5112	TCGA-S9-A7R3-01
GBMLGG(N=657)	0.307	3.034	TCGA-TQ-A7RN-01
GBMLGG(N=657)	0.2642	3.1195	TCGA-28-2513-01
GBMLGG(N=657)	0.331	2.676	TCGA-DU-A6S6-01
GBMLGG(N=657)	0.3327	2.4883	TCGA-P5-A735-01
GBMLGG(N=657)	0.3188	2.5238	TCGA-HT-7691-01
GBMLGG(N=657)	0.3142	2.3816	TCGA-FG-A6J1-01
GBMLGG(N=657)	0.3103	2.496	TCGA-S9-A7R7-01
GBMLGG(N=657)	0.2712	3.4224	TCGA-76-4929-01
GBMLGG(N=657)	0.2903	3.4752	TCGA-DU-6402-01
GBMLGG(N=657)	0.3053	0.6969	TCGA-HT-7684-01
GBMLGG(N=657)	0.3196	4.1384	TCGA-HT-8104-01
GBMLGG(N=657)	0.3294	2.8014	TCGA-FN-7833-01
GBMLGG(N=657)	0.2863	2.376	TCGA-HT-7473-01
GBMLGG(N=657)	0.2765	2.876	TCGA-06-0645-01
GBMLGG(N=657)	0.3202	1.8957	TCGA-HT-8019-01
GBMLGG(N=657)	0.3148	3.7028	TCGA-TQ-A7RU-01
GBMLGG(N=657)	0.2994	2.6783	TCGA-DB-A4XF-01
GBMLGG(N=657)	0.3232	2.4465	TCGA-FG-A713-01
GBMLGG(N=657)	0.3183	3.6916	TCGA-E1-A7YL-01
GBMLGG(N=657)	0.2798	3.4007	TCGA-CS-5396-01
GBMLGG(N=657)	0.3312	3.9232	TCGA-HW-8322-01
GBMLGG(N=657)	0.3187	2.1345	TCGA-S9-A6U9-01
GBMLGG(N=657)	0.3427	2.824	TCGA-HT-7676-01
GBMLGG(N=657)	0.3254	3.6816	TCGA-HT-7469-01
GBMLGG(N=657)	0.2856	4.6236	TCGA-32-2634-01
GBMLGG(N=657)	0.3039	2.5683	TCGA-HT-7478-01
GBMLGG(N=657)	0.3286	2.0147	TCGA-DU-A5TW-01
GBMLGG(N=657)	0.3238	2.6185	TCGA-S9-A6TX-01
GBMLGG(N=657)	0.3219	3.6703	TCGA-RY-A83Z-01
GBMLGG(N=657)	0.2717	2.7508	TCGA-06-0141-01
GBMLGG(N=657)	0.2673	4.1571	TCGA-06-0125-01
GBMLGG(N=657)	0.3011	2.9262	TCGA-FG-A6IZ-01
GBMLGG(N=657)	0.2736	3.3521	TCGA-CS-4941-01
GBMLGG(N=657)	0.3253	1.8801	TCGA-DH-A7UT-01
GBMLGG(N=657)	0.2859	1.692	TCGA-DU-5871-01
GBMLGG(N=657)	0.3223	2.128	TCGA-HW-8321-01
GBMLGG(N=657)	0.3039	3.7356	TCGA-EZ-7264-01
GBMLGG(N=657)	0.303	2.6348	TCGA-CS-6666-01
GBMLGG(N=657)	0.3073	3.7269	TCGA-HW-7491-01
GBMLGG(N=657)	0.2989	3.3435	TCGA-S9-A6U1-01
GBMLGG(N=657)	0.3001	2.8117	TCGA-E1-5307-01
GBMLGG(N=657)	0.3227	3.7898	TCGA-DU-A76L-01
GBMLGG(N=657)	0.2961	2.8076	TCGA-HW-7495-01
GBMLGG(N=657)	0.292	2.4252	TCGA-CS-6669-01
GBMLGG(N=657)	0.328	3.5299	TCGA-HT-7481-01
GBMLGG(N=657)	0.3338	3.1637	TCGA-DU-8163-01
GBMLGG(N=657)	0.2846	1.8484	TCGA-26-1442-01
GBMLGG(N=657)	0.317	3.8788	TCGA-HT-8110-01
GBMLGG(N=657)	0.3244	3.3675	TCGA-RY-A840-01
GBMLGG(N=657)	0.3188	2.5462	TCGA-VM-A8C9-01
GBMLGG(N=657)	0.3108	3.3407	TCGA-HW-8319-01
GBMLGG(N=657)	0.326	2.8219	TCGA-QH-A6CW-01
GBMLGG(N=657)	0.2838	3.3163	TCGA-DU-5870-01
GBMLGG(N=657)	0.3258	3.2267	TCGA-TM-A84S-01
GBMLGG(N=657)	0.2724	3.0706	TCGA-26-5136-01
GBMLGG(N=657)	0.2674	3.6089	TCGA-14-1034-01
GBMLGG(N=657)	0.2727	2.7336	TCGA-06-0184-01
GBMLGG(N=657)	0.2635	3.3206	TCGA-12-3652-01
GBMLGG(N=657)	0.3215	3.0376	TCGA-RY-A845-01
GBMLGG(N=657)	0.2662	3.9956	TCGA-76-4927-01
GBMLGG(N=657)	0.3007	3.0199	TCGA-FG-8182-01
GBMLGG(N=657)	0.2679	3.6393	TCGA-14-0790-01
GBMLGG(N=657)	0.26	3.5047	TCGA-26-5132-01
GBMLGG(N=657)	0.3084	3.1062	TCGA-FG-6688-01
GBMLGG(N=657)	0.3122	3.3278	TCGA-TQ-A7RP-01
GBMLGG(N=657)	0.3363	2.3953	TCGA-HT-8113-01
GBMLGG(N=657)	0.2639	4.0748	TCGA-76-4932-01
GBMLGG(N=657)	0.3139	2.8381	TCGA-HT-7689-01
GBMLGG(N=657)	0.3535	2.6895	TCGA-FG-7638-01
GBMLGG(N=657)	0.3016	4.3385	TCGA-DU-7013-01
GBMLGG(N=657)	0.2791	4.17	TCGA-32-1970-01
GBMLGG(N=657)	0.3266	2.828	TCGA-E1-A7Z3-01
GBMLGG(N=657)	0.3046	2.6371	TCGA-HT-7476-01
GBMLGG(N=657)	0.3074	3.3661	TCGA-TQ-A7RG-01
GBMLGG(N=657)	0.3245	2.8562	TCGA-FG-8181-01
GBMLGG(N=657)	0.3107	3.2677	TCGA-DU-A7T6-01
GBMLGG(N=657)	0.3289	3.5682	TCGA-DB-A4XC-01
GBMLGG(N=657)	0.3281	3.3619	TCGA-FG-A4MW-01
GBMLGG(N=657)	0.2722	3.0757	TCGA-06-0219-01
GBMLGG(N=657)	0.2682	3.3321	TCGA-DH-5142-01
GBMLGG(N=657)	0.2753	3.9774	TCGA-14-0787-01
GBMLGG(N=657)	0.3006	3.1294	TCGA-S9-A6U2-01
GBMLGG(N=657)	0.2702	4.1136	TCGA-12-0618-01
GBMLGG(N=657)	0.2698	3.9031	TCGA-27-2524-01
GBMLGG(N=657)	0.3208	2.824	TCGA-TQ-A7RH-01
GBMLGG(N=657)	0.2734	3.9783	TCGA-08-0386-01
GBMLGG(N=657)	0.3329	2.108	TCGA-DB-A75M-01
GBMLGG(N=657)	0.3326	2.6738	TCGA-HT-8012-01
GBMLGG(N=657)	0.3171	2.9167	TCGA-S9-A7QW-01
GBMLGG(N=657)	0.325	1.614	TCGA-P5-A733-01
GBMLGG(N=657)	0.3246	2.1213	TCGA-E1-A7Z4-01
GBMLGG(N=657)	0.3103	1.6045	TCGA-DU-A5TR-01
GBMLGG(N=657)	0.3305	2.2299	TCGA-FG-8185-01
GBMLGG(N=657)	0.3379	2.0946	TCGA-HW-8320-01
GBMLGG(N=657)	0.3037	1.5902	TCGA-CS-6667-01
GBMLGG(N=657)	0.2822	2.5731	TCGA-DU-5849-01
GBMLGG(N=657)	0.2803	2.9637	TCGA-DB-5279-01
GBMLGG(N=657)	0.2825	3.7443	TCGA-06-0190-01
GBMLGG(N=657)	0.3002	3.2112	TCGA-CS-6670-01
GBMLGG(N=657)	0.3035	2.5061	TCGA-DB-A64V-01
GBMLGG(N=657)	0.2711	3.7432	TCGA-06-0745-01
GBMLGG(N=657)	0.2846	3.1426	TCGA-DU-5854-01
GBMLGG(N=657)	0.3079	4.2914	TCGA-DH-A7UR-01
GBMLGG(N=657)	0.3037	3.2511	TCGA-S9-A6WL-01
GBMLGG(N=657)	0.3401	2.2723	TCGA-HT-7880-01
GBMLGG(N=657)	0.2701	3.83	TCGA-26-5135-01
GBMLGG(N=657)	0.267	3.0127	TCGA-E1-5318-01
GBMLGG(N=657)	0.3022	4.1587	TCGA-DU-6393-01
GBMLGG(N=657)	0.2781	3.3235	TCGA-41-3915-01
GBMLGG(N=657)	0.2998	2.96	TCGA-DU-5853-01
GBMLGG(N=657)	0.3326	4.4602	TCGA-TM-A84J-01
GBMLGG(N=657)	0.3002	3.5237	TCGA-FG-5962-01
GBMLGG(N=657)	0.2721	2.8916	TCGA-27-1831-01
GBMLGG(N=657)	0.3305	2.93	TCGA-F6-A8O4-01
GBMLGG(N=657)	0.2622	4.5559	TCGA-28-1753-01
GBMLGG(N=657)	0.3215	2.6441	TCGA-S9-A7R1-01
GBMLGG(N=657)	0.2794	4.748	TCGA-12-5295-01
GBMLGG(N=657)	0.3177	3.9608	TCGA-TM-A84M-01
GBMLGG(N=657)	0.3127	2.3677	TCGA-HT-8107-01
GBMLGG(N=657)	0.3079	3.154	TCGA-P5-A5ET-01
GBMLGG(N=657)	0.322	1.9712	TCGA-P5-A72W-01
GBMLGG(N=657)	0.3158	2.8096	TCGA-FG-A70Y-01
GBMLGG(N=657)	0.3172	2.9432	TCGA-TM-A84R-01
GBMLGG(N=657)	0.2977	2.0465	TCGA-HW-A5KM-01
GBMLGG(N=657)	0.324	4.2533	TCGA-HT-7477-01
GBMLGG(N=657)	0.3257	3.6463	TCGA-FG-A87Q-01
GBMLGG(N=657)	0.3071	3.7815	TCGA-FG-A70Z-01
GBMLGG(N=657)	0.3113	3.7269	TCGA-FG-A4MU-01
GBMLGG(N=657)	0.3091	3.5098	TCGA-DB-A4XB-01
GBMLGG(N=657)	0.3142	2.3048	TCGA-WY-A85D-01
GBMLGG(N=657)	0.3328	2.9507	TCGA-FG-7641-01
GBMLGG(N=657)	0.3001	1.674	TCGA-DU-5872-01
GBMLGG(N=657)	0.3059	2.1345	TCGA-FG-6689-01
GBMLGG(N=657)	0.2819	2.5238	TCGA-DB-5277-01
GBMLGG(N=657)	0.2783	4.4027	TCGA-28-5204-01
GBMLGG(N=657)	0.2926	3.1377	TCGA-HT-A615-01
GBMLGG(N=657)	0.3472	2.5585	TCGA-DU-7301-01
GBMLGG(N=657)	0.3161	2.4465	TCGA-P5-A5EW-01
GBMLGG(N=657)	0.3081	4.5946	TCGA-06-2569-01
GBMLGG(N=657)	0.3218	2.1702	TCGA-HT-A5RB-01
GBMLGG(N=657)	0.3204	2.5288	TCGA-E1-A7YN-01
GBMLGG(N=657)	0.2786	3.4304	TCGA-27-1830-01
GBMLGG(N=657)	0.3276	3.3278	TCGA-QH-A6XC-01
GBMLGG(N=657)	0.2742	4.7377	TCGA-06-2559-01
GBMLGG(N=657)	0.306	3.0199	TCGA-S9-A6WN-01
GBMLGG(N=657)	0.263	1.5806	TCGA-06-0139-01
GBMLGG(N=657)	0.298	2.1766	TCGA-DB-A64L-01
GBMLGG(N=657)	0.3189	3.981	TCGA-TM-A84I-01
GBMLGG(N=657)	0.3324	3.6018	TCGA-QH-A6CZ-01
GBMLGG(N=657)	0.3216	1.5465	TCGA-WY-A858-01
GBMLGG(N=657)	0.3204	3.2826	TCGA-VM-A8CB-01
GBMLGG(N=657)	0.2712	2.6624	TCGA-27-2526-01
GBMLGG(N=657)	0.3315	1.4704	TCGA-VM-A8CF-01
GBMLGG(N=657)	0.2914	3.8085	TCGA-06-5856-01
GBMLGG(N=657)	0.3413	2.9875	TCGA-HT-7608-01
GBMLGG(N=657)	0.303	2.828	TCGA-CS-4938-01
GBMLGG(N=657)	0.3222	2.4571	TCGA-QH-A6X5-01
GBMLGG(N=657)	0.317	2.5972	TCGA-DU-8166-01
GBMLGG(N=657)	0.3227	2.9262	TCGA-HT-8018-01
GBMLGG(N=657)	0.2991	3.3435	TCGA-DU-7292-01
GBMLGG(N=657)	0.3292	1.4494	TCGA-S9-A6TU-01
GBMLGG(N=657)	0.3294	1.9895	TCGA-DB-A75P-01
GBMLGG(N=657)	0.2713	3.4264	TCGA-06-5418-01
GBMLGG(N=657)	0.2903	3.4556	TCGA-FG-6691-01
GBMLGG(N=657)	0.303	3.2988	TCGA-DU-6399-01
GBMLGG(N=657)	0.3264	2.694	TCGA-S9-A7IQ-01
GBMLGG(N=657)	0.268	3.8054	TCGA-06-5414-01
GBMLGG(N=657)	0.3054	2.1862	TCGA-S9-A6WI-01
GBMLGG(N=657)	0.3057	2.2783	TCGA-DB-A64S-01
GBMLGG(N=657)	0.2976	3.5994	TCGA-FG-6692-01
GBMLGG(N=657)	0.2992	2.6441	TCGA-HW-7489-01
GBMLGG(N=657)	0.3313	3.1572	TCGA-R8-A6YH-01
GBMLGG(N=657)	0.2709	3.8501	TCGA-06-5417-01
GBMLGG(N=657)	0.311	2.1541	TCGA-HT-A618-01
GBMLGG(N=657)	0.2619	1.9452	TCGA-26-5134-01
GBMLGG(N=657)	0.2997	1.8119	TCGA-QH-A65S-01
GBMLGG(N=657)	0.32	2.167	TCGA-DU-7019-01
GBMLGG(N=657)	0.2739	4.5644	TCGA-76-4925-01
GBMLGG(N=657)	0.3345	4.3263	TCGA-DU-A7TJ-01
GBMLGG(N=657)	0.3296	2.4386	TCGA-TM-A84H-01
GBMLGG(N=657)	0.289	3.66	TCGA-28-2510-01
GBMLGG(N=657)	0.3175	2.9893	TCGA-S9-A7R8-01
GBMLGG(N=657)	0.3098	2.1213	TCGA-S9-A7R4-01
GBMLGG(N=657)	0.3214	3.4556	TCGA-S9-A7J3-01
GBMLGG(N=657)	0.3247	2.6348	TCGA-TM-A84L-01
GBMLGG(N=657)	0.3282	2.2872	TCGA-E1-A7YH-01
GBMLGG(N=657)	0.2839	4.1044	TCGA-06-5413-01
GBMLGG(N=657)	0.2839	4.1368	TCGA-06-0646-01
GBMLGG(N=657)	0.3075	3.2915	TCGA-P5-A5EV-01
GBMLGG(N=657)	0.3146	4.2227	TCGA-DU-A7TD-01
GBMLGG(N=657)	0.3049	1.7828	TCGA-HW-A5KL-01
GBMLGG(N=657)	0.3255	3.3787	TCGA-RY-A83X-01
GBMLGG(N=657)	0.3401	3.492	TCGA-HT-7687-01
GBMLGG(N=657)	0.3252	2.6138	TCGA-WY-A85A-01
GBMLGG(N=657)	0.2745	4.701	TCGA-12-3650-01
GBMLGG(N=657)	0.2716	2.8158	TCGA-DB-5281-01
GBMLGG(N=657)	0.3297	2.1476	TCGA-E1-A7YK-01
GBMLGG(N=657)	0.3018	1.9188	TCGA-DU-A5TU-01
GBMLGG(N=657)	0.2979	2.59	TCGA-DU-A7TA-01
GBMLGG(N=657)	0.2735	3.8095	TCGA-CS-5395-01
GBMLGG(N=657)	0.3198	2.2113	TCGA-TQ-A7RR-01
GBMLGG(N=657)	0.3252	2.5948	TCGA-HT-A5R5-01
GBMLGG(N=657)	0.2723	3.9213	TCGA-12-0616-01
GBMLGG(N=657)	0.3081	2.2603	TCGA-QH-A65V-01
GBMLGG(N=657)	0.3241	3.5923	TCGA-S9-A6WP-01
GBMLGG(N=657)	0.2688	4.6236	TCGA-28-5215-01
GBMLGG(N=657)	0.2739	2.8799	TCGA-19-2620-01
GBMLGG(N=657)	0.3013	2.7292	TCGA-S9-A6U5-01
GBMLGG(N=657)	0.321	3.3563	TCGA-E1-A7YO-01
GBMLGG(N=657)	0.3311	3.6509	TCGA-QH-A6X8-01
GBMLGG(N=657)	0.3365	2.9692	TCGA-HT-7610-01
GBMLGG(N=657)	0.3477	3.2065	TCGA-HT-7875-01
GBMLGG(N=657)	0.2809	3.6312	TCGA-16-0846-01
GBMLGG(N=657)	0.3192	2.6783	TCGA-R8-A6MK-01
GBMLGG(N=657)	0.3298	2.9525	TCGA-P5-A5F0-01
GBMLGG(N=657)	0.3227	2.872	TCGA-R8-A73M-01
GBMLGG(N=657)	0.2642	3.6054	TCGA-02-0047-01
GBMLGG(N=657)	0.3057	1.9527	TCGA-S9-A6TS-01
GBMLGG(N=657)	0.3338	2.3222	TCGA-S9-A6TW-01
GBMLGG(N=657)	0.2619	2.7314	TCGA-E1-5303-01
GBMLGG(N=657)	0.2975	4.2297	TCGA-HT-7606-01
GBMLGG(N=657)	0.3029	3.2018	TCGA-DU-6408-01
GBMLGG(N=657)	0.2944	3.1507	TCGA-FG-5964-01
GBMLGG(N=657)	0.3118	3.186	TCGA-DB-A64Q-01
GBMLGG(N=657)	0.3315	2.8034	TCGA-S9-A7IZ-01
GBMLGG(N=657)	0.2988	3.0757	TCGA-S9-A6WH-01
GBMLGG(N=657)	0.3357	2.3788	TCGA-HT-7602-01
GBMLGG(N=657)	0.2806	4.7033	TCGA-19-2624-01
GBMLGG(N=657)	0.3299	3.002	TCGA-DU-A6S8-01
GBMLGG(N=657)	0.3188	2.5972	TCGA-HT-7858-01
GBMLGG(N=657)	0.2687	3.0217	TCGA-32-1982-01
GBMLGG(N=657)	0.2676	3.6289	TCGA-27-1835-01
GBMLGG(N=657)	0.3097	3.6916	TCGA-HT-7860-01
GBMLGG(N=657)	0.3065	3.6657	TCGA-DU-7006-01
GBMLGG(N=657)	0.2989	2.685	TCGA-TQ-A7RS-01
GBMLGG(N=657)	0.3058	3.0533	TCGA-DU-7009-01
GBMLGG(N=657)	0.2796	3.1393	TCGA-06-0747-01
GBMLGG(N=657)	0.3135	3.66	TCGA-DU-7010-01
GBMLGG(N=657)	0.3128	2.6783	TCGA-QH-A6X3-01
GBMLGG(N=657)	0.342	3.2781	TCGA-DU-8164-01
GBMLGG(N=657)	0.3024	3.5449	TCGA-DU-7018-01
GBMLGG(N=657)	0.3173	3.0376	TCGA-RY-A843-01
GBMLGG(N=657)	0.3225	1.5514	TCGA-DU-7014-01
GBMLGG(N=657)	0.3422	2.4412	TCGA-HT-7693-01
GBMLGG(N=657)	0.3098	3.2297	TCGA-FG-A6J3-01
GBMLGG(N=657)	0.2655	3.2297	TCGA-28-5220-01
GBMLGG(N=657)	0.3186	2.5238	TCGA-HT-8106-01
GBMLGG(N=657)	0.2962	3.0654	TCGA-HT-7472-01
GBMLGG(N=657)	0.2746	3.1701	TCGA-14-0817-01
GBMLGG(N=657)	0.333	1.6649	TCGA-HT-7855-01
GBMLGG(N=657)	0.2611	3.7709	TCGA-06-2570-01
GBMLGG(N=657)	0.3259	3.6136	TCGA-DB-A4XG-01
GBMLGG(N=657)	0.3144	3.6486	TCGA-HT-A5RC-01
GBMLGG(N=657)	0.3238	2.3508	TCGA-VM-A8C8-01
GBMLGG(N=657)	0.3192	2.4198	TCGA-HT-7681-01
GBMLGG(N=657)	0.2857	3.8033	TCGA-41-4097-01
GBMLGG(N=657)	0.3401	2.4649	TCGA-DU-A6S2-01
GBMLGG(N=657)	0.3361	2.8034	TCGA-DU-7309-01
GBMLGG(N=657)	0.3094	2.108	TCGA-DB-A4XH-01
GBMLGG(N=657)	0.3123	3.3307	TCGA-HT-7485-01
GBMLGG(N=657)	0.3031	2.3077	TCGA-VW-A7QS-01
GBMLGG(N=657)	0.2679	4.34242	TCGA-06-0211-01
GBMLGG(N=657)	0.3199	2.2753	TCGA-VV-A86M-01
GBMLGG(N=657)	0.321	4.6212	TCGA-E1-A7YV-01
GBMLGG(N=657)	0.3085	3.5706	TCGA-HT-7468-01
GBMLGG(N=657)	0.2721	4.3133	TCGA-02-2483-01
GBMLGG(N=657)	0.3353	3.5237	TCGA-HT-7677-01
GBMLGG(N=657)	0.2719	4.7154	TCGA-76-4931-01
GBMLGG(N=657)	0.3033	2.5388	TCGA-DU-A5TY-01
GBMLGG(N=657)	0.3149	2.8622	TCGA-HT-8109-01
GBMLGG(N=657)	0.3132	2.118	TCGA-HT-7479-01
GBMLGG(N=657)	0.2726	3.0825	TCGA-DB-5275-01
GBMLGG(N=657)	0.3311	2.578	TCGA-TM-A7C4-01
GBMLGG(N=657)	0.2726	4.215	TCGA-27-2523-01
GBMLGG(N=657)	0.2742	3.9204	TCGA-27-1837-01
GBMLGG(N=657)	0.3194	3.5875	TCGA-DH-A7UU-01
GBMLGG(N=657)	0.2839	3.0927	TCGA-06-0744-01
GBMLGG(N=657)	0.3128	2.3788	TCGA-HT-A4DV-01
GBMLGG(N=657)	0.3213	2.9128	TCGA-FG-8186-01
GBMLGG(N=657)	0.2957	3.186	TCGA-FG-A4MT-01
GBMLGG(N=657)	0.3067	3.3221	TCGA-E1-5305-01
GBMLGG(N=657)	0.2715	2.4306	TCGA-CS-5393-01
GBMLGG(N=657)	0.2954	2.6371	TCGA-DU-6395-01
GBMLGG(N=657)	0.3072	1.6187	TCGA-DB-A64X-01
GBMLGG(N=657)	0.3268	4.7367	TCGA-S9-A7IS-01
GBMLGG(N=657)	0.3203	3.0163	TCGA-HT-7856-01
GBMLGG(N=657)	0.2667	2.7679	TCGA-06-0750-01
GBMLGG(N=657)	0.258	3.3717	TCGA-32-5222-01
GBMLGG(N=657)	0.3085	2.5437	TCGA-QH-A6XA-01
GBMLGG(N=657)	0.3201	2.2144	TCGA-P5-A77W-01
GBMLGG(N=657)	0.2674	3.3364	TCGA-27-2519-01
GBMLGG(N=657)	0.281	3.2959	TCGA-CS-4942-01
GBMLGG(N=657)	0.2942	3.4411	TCGA-CS-6186-01
GBMLGG(N=657)	0.3056	3.4358	TCGA-DU-7008-01
GBMLGG(N=657)	0.3311	2.8701	TCGA-HT-7688-01
GBMLGG(N=657)	0.3095	2.9205	TCGA-DU-A7T8-01
GBMLGG(N=657)	0.3307	2.2663	TCGA-DU-A6S3-01
GBMLGG(N=657)	0.3034	2.7117	TCGA-DB-A64U-01
GBMLGG(N=657)	0.2984	5.0756	TCGA-HT-A61C-01
GBMLGG(N=657)	0.2969	3.8085	TCGA-12-0821-01
GBMLGG(N=657)	0.3059	2.876	TCGA-TQ-A7RF-01
GBMLGG(N=657)	0.2909	4.2795	TCGA-19-2619-01
GBMLGG(N=657)	0.3289	3.4752	TCGA-F6-A8O3-01
GBMLGG(N=657)	0.3103	3.1829	TCGA-R8-A6ML-01
GBMLGG(N=657)	0.3051	2.8219	TCGA-DU-A5TT-01
GBMLGG(N=657)	0.3252	2.6962	TCGA-QH-A870-01
GBMLGG(N=657)	0.3276	2.376	TCGA-DB-A75O-01
GBMLGG(N=657)	0.322	3.034	TCGA-HT-8111-01
GBMLGG(N=657)	0.3165	3.1491	TCGA-S9-A7QZ-01
GBMLGG(N=657)	0.2888	3.6497	TCGA-12-0619-01
GBMLGG(N=657)	0.2724	2.7636	TCGA-DB-5273-01
GBMLGG(N=657)	0.3411	2.8381	TCGA-HT-7470-01
GBMLGG(N=657)	0.3172	2.4386	TCGA-FG-A4MY-01
GBMLGG(N=657)	0.3235	2.7401	TCGA-HT-8108-01
GBMLGG(N=657)	0.2953	3.741	TCGA-DB-A4XE-01
GBMLGG(N=657)	0.3359	4.1359	TCGA-HT-A4DS-01
GBMLGG(N=657)	0.345	3.208	TCGA-DU-8158-01
GBMLGG(N=657)	0.3025	2.4386	TCGA-HT-7474-01
GBMLGG(N=657)	0.2646	2.9338	TCGA-DH-5143-01
GBMLGG(N=657)	0.2963	2.6418	TCGA-TQ-A7RJ-01
GBMLGG(N=657)	0.3143	2.0979	TCGA-S9-A7QY-01
GBMLGG(N=657)	0.306	2.7993	TCGA-DB-A4XA-01
GBMLGG(N=657)	0.274	2.6325	TCGA-28-5213-01
GBMLGG(N=657)	0.3289	2.3423	TCGA-P5-A731-01
GBMLGG(N=657)	0.3292	3.3633	TCGA-E1-A7YE-01
GBMLGG(N=657)	0.3077	3.0893	TCGA-FG-A710-01
GBMLGG(N=657)	0.3236	2.7636	TCGA-HT-8010-01
GBMLGG(N=657)	0.3023	2.7572	TCGA-DU-7299-01
GBMLGG(N=657)	0.2639	2.5683	TCGA-DB-5270-01
GBMLGG(N=657)	0.2756	2.7721	TCGA-14-0789-01
GBMLGG(N=657)	0.3322	3.4907	TCGA-KT-A74X-01
GBMLGG(N=657)	0.3292	2.7379	TCGA-DB-A75L-01
GBMLGG(N=657)	0.2961	2.2237	TCGA-HT-A616-01
GBMLGG(N=657)	0.3281	2.5288	TCGA-HT-A74K-01
GBMLGG(N=657)	0.3184	2.0776	TCGA-WY-A85C-01
GBMLGG(N=657)	0.3307	2.6348	TCGA-FG-8188-01
GBMLGG(N=657)	0.3117	2.8877	TCGA-DU-A6S7-01
GBMLGG(N=657)	0.3004	3.1245	TCGA-DU-7294-01
GBMLGG(N=657)	0.268	2.7444	TCGA-DB-5274-01
GBMLGG(N=657)	0.2631	4.3111	TCGA-28-5209-01
GBMLGG(N=657)	0.3542	3.2359	TCGA-HT-7604-01
GBMLGG(N=657)	0.3261	3.0859	TCGA-TM-A84F-01
GBMLGG(N=657)	0.3045	2.5338	TCGA-DB-A64O-01
GBMLGG(N=657)	0.3233	2.982	TCGA-HT-7884-01
GBMLGG(N=657)	0.308	2.7336	TCGA-S9-A6WE-01
GBMLGG(N=657)	0.3068	2.6647	TCGA-QH-A6CY-01
GBMLGG(N=657)	0.3107	3.8411	TCGA-S9-A6WM-01
GBMLGG(N=657)	0.2892	4.0567	TCGA-28-5218-01
GBMLGG(N=657)	0.3277	4.1628	TCGA-HT-A5RA-01
GBMLGG(N=657)	0.3116	3.6703	TCGA-QH-A6CV-01
GBMLGG(N=657)	0.315	2.6805	TCGA-VM-A8CE-01
GBMLGG(N=657)	0.2992	3.5362	TCGA-DU-5852-01
GBMLGG(N=657)	0.3156	2.5536	TCGA-P5-A72U-01
GBMLGG(N=657)	0.261	4.0064	TCGA-28-2514-01
GBMLGG(N=657)	0.3054	4.5142	TCGA-06-5859-01
GBMLGG(N=657)	0.3281	2.7508	TCGA-DB-A75K-01
GBMLGG(N=657)	0.3115	3.5959	TCGA-DU-6410-01
GBMLGG(N=657)	0.2915	3.7204	TCGA-28-2509-01
GBMLGG(N=657)	0.3006	2.6873	TCGA-QH-A65Z-01
GBMLGG(N=657)	0.2743	4.7198	TCGA-14-1825-01
GBMLGG(N=657)	0.3209	2.6693	TCGA-S9-A7IY-01
GBMLGG(N=657)	0.3122	2.6602	TCGA-P5-A781-01
GBMLGG(N=657)	0.3214	4.1027	TCGA-TM-A84G-01
GBMLGG(N=657)	0.3076	2.8582	TCGA-HW-A5KK-01
GBMLGG(N=657)	0.2577	3.1523	TCGA-E1-5311-01
GBMLGG(N=657)	0.3424	3.7688	TCGA-FG-7634-01
GBMLGG(N=657)	0.2913	2.0844	TCGA-DU-5855-01
GBMLGG(N=657)	0.2915	2.1702	TCGA-DU-6396-01
GBMLGG(N=657)	0.3315	3.3842	TCGA-19-4065-01
GBMLGG(N=657)	0.3356	2.8916	TCGA-FG-7643-01
GBMLGG(N=657)	0.3227	2.6043	TCGA-TM-A84C-01
GBMLGG(N=657)	0.2728	3.6172	TCGA-02-2485-01
GBMLGG(N=657)	0.3171	2.7889	TCGA-WY-A85E-01
GBMLGG(N=657)	0.279	3.6254	TCGA-12-1597-01
GBMLGG(N=657)	0.2715	4.0375	TCGA-28-1747-01
GBMLGG(N=657)	0.2863	2.5313	TCGA-28-2499-01
GBMLGG(N=657)	0.3159	3.8876	TCGA-DU-7298-01
GBMLGG(N=657)	0.3181	2.05	TCGA-TM-A84T-01
GBMLGG(N=657)	0.3339	2.9413	TCGA-FG-7637-01
GBMLGG(N=657)	0.3315	3.4945	TCGA-HT-A5R9-01
GBMLGG(N=657)	0.3017	2.5536	TCGA-HT-A614-01
GBMLGG(N=657)	0.2803	2.9618	TCGA-06-0649-01
GBMLGG(N=657)	0.3077	3.0706	TCGA-QH-A65R-01
GBMLGG(N=657)	0.3257	3.0961	TCGA-FG-A60J-01
GBMLGG(N=657)	0.3082	2.8858	TCGA-FG-8189-01
GBMLGG(N=657)	0.295	2.6371	TCGA-P5-A5EY-01
GBMLGG(N=657)	0.2692	4.2312	TCGA-06-2564-01
GBMLGG(N=657)	0.2961	4.0584	TCGA-06-5408-01
GBMLGG(N=657)	0.2741	3.1162	TCGA-27-1832-01
GBMLGG(N=657)	0.2721	2.694	TCGA-14-1829-01
GBMLGG(N=657)	0.2767	3.0234	TCGA-32-2615-01
GBMLGG(N=657)	0.2707	4.0001	TCGA-06-0158-01
GBMLGG(N=657)	0.3004	2.5238	TCGA-HT-7882-01
GBMLGG(N=657)	0.2652	3.9506	TCGA-06-2558-01
GBMLGG(N=657)	0.3254	4.6502	TCGA-HT-8011-01
GBMLGG(N=657)	0.2917	3.5559	TCGA-DU-6394-01
GBMLGG(N=657)	0.2729	3.6405	TCGA-28-5216-01
GBMLGG(N=657)	0.3152	3.1112	TCGA-WY-A859-01
GBMLGG(N=657)	0.3309	2.7572	TCGA-WY-A85B-01
GBMLGG(N=657)	0.3065	3.5449	TCGA-S9-A6UB-01
GBMLGG(N=657)	0.2799	3.4517	TCGA-28-5207-01
GBMLGG(N=657)	0.2982	3.3717	TCGA-S9-A6U6-01
GBMLGG(N=657)	0.3378	4.4344	TCGA-DU-8168-01
GBMLGG(N=657)	0.2819	3.2929	TCGA-41-2572-01
GBMLGG(N=657)	0.2763	3.0757	TCGA-06-0130-01
GBMLGG(N=657)	0.2983	3.0481	TCGA-DU-7290-01
GBMLGG(N=657)	0.2849	3.9232	TCGA-06-5416-01
GBMLGG(N=657)	0.274	3.863	TCGA-06-0168-01
GBMLGG(N=657)	0.2971	3.5387	TCGA-DU-6407-01
GBMLGG(N=657)	0.2745	2.2421	TCGA-02-0055-01
GBMLGG(N=657)	0.3289	3.0463	TCGA-HT-7601-01
GBMLGG(N=657)	0.2843	4.6804	TCGA-DU-6403-01
GBMLGG(N=657)	0.2682	3.9022	TCGA-06-5415-01
GBMLGG(N=657)	0.3077	2.7679	TCGA-DB-A64R-01
GBMLGG(N=657)	0.3293	3.1924	TCGA-E1-A7YQ-01
GBMLGG(N=657)	0.2937	4.1103	TCGA-DU-6405-01
GBMLGG(N=657)	0.2926	2.4225	TCGA-HW-7487-01
GBMLGG(N=657)	0.3214	2.4701	TCGA-S9-A7R2-01
GBMLGG(N=657)	0.3272	3.1011	TCGA-S9-A7J1-01
GBMLGG(N=657)	0.3191	2.2663	TCGA-P5-A72X-01
GBMLGG(N=657)	0.3257	3.4596	TCGA-E1-A7YJ-01
GBMLGG(N=657)	0.2943	3.5362	TCGA-06-5411-01
GBMLGG(N=657)	0.2619	3.5461	TCGA-26-5139-01
GBMLGG(N=657)	0.3378	2.7993	TCGA-HT-7690-01
GBMLGG(N=657)	0.3369	2.7993	TCGA-HT-8105-01
GBMLGG(N=657)	0.2737	3.0038	TCGA-76-4928-01
GBMLGG(N=657)	0.2763	3.9496	TCGA-06-0644-01
GBMLGG(N=657)	0.3106	3.034	TCGA-E1-A7YY-01
GBMLGG(N=657)	0.3159	3.1311	TCGA-HT-A619-01
GBMLGG(N=657)	0.2966	3.1844	TCGA-DU-6400-01
GBMLGG(N=657)	0.3204	2.9948	TCGA-P5-A737-01
GBMLGG(N=657)	0.2899	4.178	TCGA-14-0871-01
GBMLGG(N=657)	0.3147	3.0428	TCGA-RY-A83Y-01
GBMLGG(N=657)	0.4513	3.055	TCGA-HT-8564-01
GBMLGG(N=657)	0.3197	2.3871	TCGA-HT-7686-01
GBMLGG(N=657)	0.3181	3.3492	TCGA-E1-A7YM-01
GBMLGG(N=657)	0.3079	2.4252	TCGA-DH-A66F-01
GBMLGG(N=657)	0.2623	3.3911	TCGA-CS-5390-01
GBMLGG(N=657)	0.2953	3.5324	TCGA-S9-A6UA-01
GBMLGG(N=657)	0.2716	3.2557	TCGA-32-2632-01
GBMLGG(N=657)	0.3341	4.5547	TCGA-FG-A87N-01
GBMLGG(N=657)	0.3226	3.0533	TCGA-VV-A829-01
GBMLGG(N=657)	0.3027	2.8381	TCGA-DH-A66B-01
GBMLGG(N=657)	0.3312	2.9655	TCGA-HT-A5R7-01
GBMLGG(N=657)	0.3295	3.6405	TCGA-CS-5394-01
GBMLGG(N=657)	0.312	2.8562	TCGA-DH-A66D-01
GBMLGG(N=657)	0.3151	3.154	TCGA-HT-7877-01
GBMLGG(N=657)	0.2696	3.2885	TCGA-06-0882-01
GBMLGG(N=657)	0.3062	3.1228	TCGA-DU-6542-01
GBMLGG(N=657)	0.3038	2.3048	TCGA-QH-A6CS-01
GBMLGG(N=657)	0.3198	3.5174	TCGA-E1-A7YU-01
GBMLGG(N=657)	0.3258	2.8321	TCGA-W9-A837-01
GBMLGG(N=657)	0.3523	3.0181	TCGA-IK-7675-01
GBMLGG(N=657)	0.3466	2.5263	TCGA-DU-7306-01
GBMLGG(N=657)	0.3346	2.9784	TCGA-QH-A6X9-01
GBMLGG(N=657)	0.3121	3.4556	TCGA-S9-A6U0-01
GBMLGG(N=657)	0.3385	2.7636	TCGA-HT-7611-01
GBMLGG(N=657)	0.3165	3.0791	TCGA-S9-A6TY-01
GBMLGG(N=657)	0.2925	2.6161	TCGA-DU-A7TB-01
GBMLGG(N=657)	0.2834	2.8838	TCGA-19-2625-01
GBMLGG(N=657)	0.3048	3.0774	TCGA-IK-8125-01
GBMLGG(N=657)	0.3211	1.4547	TCGA-WH-A86K-01
GBMLGG(N=657)	0.2583	2.0218	TCGA-DH-5141-01
GBMLGG(N=657)	0.3126	2.5163	TCGA-FG-A60L-01
GBMLGG(N=657)	0.2732	2.5288	TCGA-DB-5280-01
GBMLGG(N=657)	0.3186	3.7149	TCGA-S9-A7IX-01
GBMLGG(N=657)	0.2972	3.1344	TCGA-32-1980-01
GBMLGG(N=657)	0.2951	3.0498	TCGA-FG-5965-01
GBMLGG(N=657)	0.3526	2.1378	TCGA-P5-A5F6-01
GBMLGG(N=657)	0.2731	4.1011	TCGA-27-1834-01
GBMLGG(N=657)	0.3159	2.5036	TCGA-DU-7007-01
GBMLGG(N=657)	0.3003	1.2271	TCGA-HW-7490-01
GBMLGG(N=657)	0.3077	4.1111	TCGA-CS-6188-01
GBMLGG(N=657)	0.3029	3.9938	TCGA-CS-6668-01
GBMLGG(N=657)	0.3305	4.0722	TCGA-DU-8165-01
GBMLGG(N=657)	0.3302	2.4386	TCGA-HT-7692-01
GBMLGG(N=657)	0.3073	5.3862	TCGA-TQ-A7RM-01
GBMLGG(N=657)	0.3379	3.6972	TCGA-DU-8161-01
GBMLGG(N=657)	0.331	1.6512	TCGA-P5-A736-01
GBMLGG(N=657)	0.2918	1.0847	TCGA-DU-6401-01
GBMLGG(N=657)	0.3187	2.1606	TCGA-HT-A74H-01
GBMLGG(N=657)	0.2728	3.0842	TCGA-41-2571-01
GBMLGG(N=657)	0.3217	2.6138	TCGA-TQ-A7RV-01
GBMLGG(N=657)	0.2925	2.5363	TCGA-14-0781-01
GBMLGG(N=657)	0.2932	2.982	TCGA-HT-7483-01
GBMLGG(N=657)	0.3037	2.7139	TCGA-HT-7620-01
GBMLGG(N=657)	0.3363	2.8622	TCGA-HT-7480-01
GBMLGG(N=657)	0.2759	4.2266	TCGA-06-0157-01
GBMLGG(N=657)	0.3264	4.9426	TCGA-S9-A7J0-01
GBMLGG(N=657)	0.2826	4.4108	TCGA-12-3653-01
GBMLGG(N=657)	0.325	2.945	TCGA-TM-A84Q-01
GBMLGG(N=657)	0.2626	4.0807	TCGA-76-4926-01
GBMLGG(N=657)	0.2808	4.2781	TCGA-26-5133-01
GBMLGG(N=657)	0.2614	3.1442	TCGA-06-2562-01
GBMLGG(N=657)	0.3174	2.7051	TCGA-RY-A847-01
GBMLGG(N=657)	0.3177	3.4971	TCGA-TQ-A7RQ-01
GBMLGG(N=657)	0.307	3.0074	TCGA-TQ-A7RW-01
GBMLGG(N=657)	0.3244	2.4412	TCGA-FG-8191-01
GBMLGG(N=657)	0.3285	2.9692	TCGA-E1-A7YW-01
GBMLGG(N=657)	0.2659	2.8482	TCGA-DB-5278-01
GBMLGG(N=657)	0.325	3.7094	TCGA-E1-A7YS-01
GBMLGG(N=657)	0.353	3.1045	TCGA-HT-7695-01
GBMLGG(N=657)	0.3339	3.2267	TCGA-DU-7012-01
GBMLGG(N=657)	0.3098	2.909	TCGA-HT-7879-01
GBMLGG(N=657)	0.3255	2.6278	TCGA-DU-A7TC-01
GBMLGG(N=657)	0.2704	3.1908	TCGA-27-2521-01
GBMLGG(N=657)	0.3507	2.685	TCGA-HT-7680-01
GBMLGG(N=657)	0.3146	3.4622	TCGA-DB-A4X9-01
GBMLGG(N=657)	0.324	3.011	TCGA-TQ-A7RI-01
GBMLGG(N=657)	0.3096	2.9243	TCGA-TM-A7CA-01
GBMLGG(N=657)	0.3124	3.1604	TCGA-QH-A86X-01
GBMLGG(N=657)	0.3275	3.3076	TCGA-DU-A76R-01
GBMLGG(N=657)	0.2628	3.0671	TCGA-DH-5144-01
GBMLGG(N=657)	0.3173	4.382	TCGA-41-5651-01
GBMLGG(N=657)	0.3159	3.7335	TCGA-E1-A7Z2-01
GBMLGG(N=657)	0.3051	2.5288	TCGA-DU-A5TP-01
GBMLGG(N=657)	0.2695	2.376	TCGA-06-0210-01
GBMLGG(N=657)	0.3327	2.5112	TCGA-FG-8187-01
GBMLGG(N=657)	0.2753	5.1351	TCGA-E1-5304-01
GBMLGG(N=657)	0.2751	4.2803	TCGA-CS-4943-01
GBMLGG(N=657)	0.2954	4.613	TCGA-19-5960-01
GBMLGG(N=657)	0.2763	4.1772	TCGA-06-0686-01
GBMLGG(N=657)	0.2629	4.5596	TCGA-DH-5140-01
GBMLGG(N=657)	0.3249	1.9452	TCGA-TM-A7CF-01
GBMLGG(N=657)	0.2996	3.0842	TCGA-DH-A7US-01
GBMLGG(N=657)	0.3194	3.0074	TCGA-HT-A61B-01
GBMLGG(N=657)	0.3107	2.5388	TCGA-E1-A7Z6-01
GBMLGG(N=657)	0.3135	2.4063	TCGA-HT-7857-01
GBMLGG(N=657)	0.3071	2.8055	TCGA-E1-5319-01
GBMLGG(N=657)	0.3178	1.3956	TCGA-DU-A5TS-01
GBMLGG(N=657)	0.5506	3.3563	TCGA-DU-6392-01
GBMLGG(N=657)	0.3199	1.7273	TCGA-QH-A6CU-01
GBMLGG(N=657)	0.2898	3.2251	TCGA-DU-6404-01
GBMLGG(N=657)	0.3289	3.4477	TCGA-VW-A8FI-01
GBMLGG(N=657)	0.3207	3.3278	TCGA-HT-A74L-01
GBMLGG(N=657)	0.3157	4.2434	TCGA-P5-A5EU-01
GBMLGG(N=657)	0.3087	2.1247	TCGA-P5-A5EZ-01
GBMLGG(N=657)	0.3042	3.2267	TCGA-S9-A89Z-01
GBMLGG(N=657)	0.3258	2.6019	TCGA-S9-A6TZ-01
GBMLGG(N=657)	0.2997	3.6635	TCGA-FG-5963-01
GBMLGG(N=657)	0.307	2.4063	TCGA-HT-A61A-01
GBMLGG(N=657)	0.3258	2.0912	TCGA-S9-A89V-01
GBMLGG(N=657)	0.3127	4.3456	TCGA-DB-A64W-01
GBMLGG(N=657)	0.2943	1.5115	TCGA-FG-A4MX-01
GBMLGG(N=657)	0.3185	3.3703	TCGA-P5-A72Z-01
GBMLGG(N=657)	0.3168	2.3843	TCGA-HT-8114-01
GBMLGG(N=657)	0.2704	3.7982	TCGA-06-2563-01
GBMLGG(N=657)	0.29	3.6347	TCGA-15-1444-01
GBMLGG(N=657)	0.2788	2.183	TCGA-32-4213-01
GBMLGG(N=657)	0.323	2.5561	TCGA-HT-7881-01
GBMLGG(N=657)	0.2727	3.928	TCGA-15-0742-01
GBMLGG(N=657)	0.2697	1.8201	TCGA-CS-4944-01
GBMLGG(N=657)	0.3894	3.5237	TCGA-06-0187-01
GBMLGG(N=657)	0.2907	5.1879	TCGA-19-1390-01
GBMLGG(N=657)	0.3129	2.4727	TCGA-S9-A7QX-01
GBMLGG(N=657)	0.3196	2.5087	TCGA-DU-A7TG-01
GBMLGG(N=657)	0.3014	4.0118	TCGA-DU-5874-01
GBMLGG(N=657)	0.3362	2.8994	TCGA-TQ-A8XE-01
GBMLGG(N=657)	0.3353	2.9674	TCGA-DU-7300-01
GBMLGG(N=657)	0.3431	2.9356	TCGA-HT-7694-01
GBMLGG(N=657)	0.3498	4.0748	TCGA-HT-7471-01
GBMLGG(N=657)	0.3121	2.9469	TCGA-DB-A4XD-01
GBMLGG(N=657)	0.3029	3.0688	TCGA-TQ-A7RK-01
GBMLGG(N=657)	0.3106	2.6371	TCGA-HT-7475-01
GBMLGG(N=657)	0.3066	3.7614	TCGA-TQ-A7RO-01
GBMLGG(N=657)	0.3317	2.7292	TCGA-HT-7902-01
GBMLGG(N=657)	0.2984	2.9911	TCGA-FG-A711-01
GBMLGG(N=657)	0.2881	3.6184	TCGA-06-2557-01
GBMLGG(N=657)	0.2762	2.5948	TCGA-DB-5276-01
GBMLGG(N=657)	0.3176	2.3394	TCGA-P5-A730-01
GBMLGG(N=657)	0.3261	4.2736	TCGA-E1-A7YD-01
GBMLGG(N=657)	0.3228	2.1574	TCGA-HT-A74O-01
GBMLGG(N=657)	0.3105	3.1045	TCGA-HT-8015-01
GBMLGG(N=657)	0.3272	2.5487	TCGA-HT-A74J-01
GBMLGG(N=657)	0.267	3.5035	TCGA-06-0878-01
GBMLGG(N=657)	0.323	4.1036	TCGA-DH-A669-01
GBMLGG(N=657)	0.2758	4.5293	TCGA-06-0129-01
GBMLGG(N=657)	0.3049	2.6715	TCGA-HT-A617-01
GBMLGG(N=657)	0.2652	2.9857	TCGA-16-1045-01
GBMLGG(N=657)	0.2749	4.546	TCGA-06-2567-01
GBMLGG(N=657)	0.321	3.5863	TCGA-32-2616-01
GBMLGG(N=657)	0.3393	2.7073	TCGA-HT-7605-01
GBMLGG(N=657)	0.3207	2.7805	TCGA-S9-A6WO-01
GBMLGG(N=657)	0.2613	3.958	TCGA-28-5208-01
GBMLGG(N=657)	0.2911	4.0091	TCGA-06-1804-01
GBMLGG(N=657)	0.3271	2.7183	TCGA-QH-A6CX-01
GBMLGG(N=657)	0.2618	3.0038	TCGA-14-2554-01
GBMLGG(N=657)	0.3366	2.6255	TCGA-P5-A5F4-01
GBMLGG(N=657)	0.3053	3.2174	TCGA-DU-A76K-01
GBMLGG(N=657)	0.3204	2.2931	TCGA-VM-A8CH-01
GBMLGG(N=657)	0.3513	2.004	TCGA-HT-7609-01
GBMLGG(N=657)	0.2737	4.2706	TCGA-27-2528-01
GBMLGG(N=657)	0.3233	3.2915	TCGA-QH-A6X4-01
GBMLGG(N=657)	0.3082	2.036	TCGA-DH-A7UV-01
GBMLGG(N=657)	0.3229	2.93	TCGA-TM-A7C3-01
GBMLGG(N=657)	0.3054	3.5645	TCGA-S9-A6WG-01
GBMLGG(N=657)	0.3491	4.3053	TCGA-06-5858-01
GBMLGG(N=657)	0.3072	3.1442	TCGA-FG-6690-01
GBMLGG(N=657)	0.3418	2.4386	TCGA-DU-8167-01
GBMLGG(N=657)	0.3232	2.7657	TCGA-QH-A65X-01
GBMLGG(N=657)	0.2721	2.108	TCGA-06-0178-01
GBMLGG(N=657)	0.3274	1.7617	TCGA-P5-A780-01
GBMLGG(N=657)	0.2649	3.417	TCGA-E1-5302-01
GBMLGG(N=657)	0.2769	2.05	TCGA-14-1823-01
GBMLGG(N=657)	0.3105	1.7009	TCGA-HW-A5KJ-01
GBMLGG(N=657)	0.3072	2.9356	TCGA-R8-A6MO-01
GBMLGG(N=657)	0.3321	2.5511	TCGA-FG-7636-01
GBMLGG(N=657)	0.2888	2.1147	TCGA-CS-6290-01
GBMLGG(N=657)	0.2986	3.9327	TCGA-DU-5847-01
GBMLGG(N=657)	0.3013	4.6514	TCGA-DU-6406-01
GBMLGG(N=657)	0.2901	2.7763	TCGA-06-0743-01
GBMLGG(N=657)	0.3428	3.7028	TCGA-TM-A84B-01
LGG(N=506)	0.3226	2.8819	TCGA-S9-A7J2-01
LGG(N=506)	0.3294	5.1065	TCGA-E1-A7YI-01
LGG(N=506)	0.3434	3.3717	TCGA-DU-7302-01
LGG(N=506)	0.331	3.1987	TCGA-DU-A7TI-01
LGG(N=506)	0.3291	2.043	TCGA-P5-A5EX-01
LGG(N=506)	0.3059	3.2826	TCGA-HT-8563-01
LGG(N=506)	0.3046	3.0074	TCGA-FG-A60K-01
LGG(N=506)	0.2936	3.7291	TCGA-CS-5397-01
LGG(N=506)	0.2614	3.5337	TCGA-E1-5322-01
LGG(N=506)	0.3126	2.233	TCGA-HT-8558-01
LGG(N=506)	0.2927	2.3816	TCGA-S9-A6U8-01
LGG(N=506)	0.3046	2.2051	TCGA-HT-7854-01
LGG(N=506)	0.3082	2.7073	TCGA-HT-7467-01
LGG(N=506)	0.3173	2.7826	TCGA-HT-7874-01
LGG(N=506)	0.3293	2.9469	TCGA-S9-A6TV-01
LGG(N=506)	0.3279	4.0348	TCGA-VM-A8CD-01
LGG(N=506)	0.3365	2.8034	TCGA-HT-7616-01
LGG(N=506)	0.3216	4.6294	TCGA-KT-A7W1-01
LGG(N=506)	0.3259	2.9167	TCGA-P5-A5F2-01
LGG(N=506)	0.3408	3.2174	TCGA-HT-7607-01
LGG(N=506)	0.3182	3.3379	TCGA-HT-7873-01
LGG(N=506)	0.3088	1.7316	TCGA-HT-7603-01
LGG(N=506)	0.2945	3.1604	TCGA-DB-A64P-01
LGG(N=506)	0.2981	2.9148	TCGA-HW-7486-01
LGG(N=506)	0.3352	2.3816	TCGA-P5-A5F1-01
LGG(N=506)	0.3028	1.6649	TCGA-DU-7011-01
LGG(N=506)	0.3367	2.8602	TCGA-P5-A77X-01
LGG(N=506)	0.3079	3.1669	TCGA-HW-7493-01
LGG(N=506)	0.3185	1.9786	TCGA-VM-A8CA-01
LGG(N=506)	0.3113	2.5036	TCGA-DU-7015-01
LGG(N=506)	0.3282	2.7951	TCGA-TM-A7C5-01
LGG(N=506)	0.2975	3.002	TCGA-DU-8162-01
LGG(N=506)	0.3239	2.6464	TCGA-TM-A84O-01
LGG(N=506)	0.3032	2.5112	TCGA-S9-A7R3-01
LGG(N=506)	0.307	3.034	TCGA-TQ-A7RN-01
LGG(N=506)	0.331	2.676	TCGA-DU-A6S6-01
LGG(N=506)	0.3327	2.4883	TCGA-P5-A735-01
LGG(N=506)	0.3188	2.5238	TCGA-HT-7691-01
LGG(N=506)	0.3142	2.3816	TCGA-FG-A6J1-01
LGG(N=506)	0.3103	2.496	TCGA-S9-A7R7-01
LGG(N=506)	0.2903	3.4752	TCGA-DU-6402-01
LGG(N=506)	0.3053	0.6969	TCGA-HT-7684-01
LGG(N=506)	0.3196	4.1384	TCGA-HT-8104-01
LGG(N=506)	0.3294	2.8014	TCGA-FN-7833-01
LGG(N=506)	0.2863	2.376	TCGA-HT-7473-01
LGG(N=506)	0.3202	1.8957	TCGA-HT-8019-01
LGG(N=506)	0.3148	3.7028	TCGA-TQ-A7RU-01
LGG(N=506)	0.2994	2.6783	TCGA-DB-A4XF-01
LGG(N=506)	0.3232	2.4465	TCGA-FG-A713-01
LGG(N=506)	0.3183	3.6916	TCGA-E1-A7YL-01
LGG(N=506)	0.2798	3.4007	TCGA-CS-5396-01
LGG(N=506)	0.3312	3.9232	TCGA-HW-8322-01
LGG(N=506)	0.3187	2.1345	TCGA-S9-A6U9-01
LGG(N=506)	0.3427	2.824	TCGA-HT-7676-01
LGG(N=506)	0.3254	3.6816	TCGA-HT-7469-01
LGG(N=506)	0.3039	2.5683	TCGA-HT-7478-01
LGG(N=506)	0.3286	2.0147	TCGA-DU-A5TW-01
LGG(N=506)	0.3238	2.6185	TCGA-S9-A6TX-01
LGG(N=506)	0.3219	3.6703	TCGA-RY-A83Z-01
LGG(N=506)	0.3011	2.9262	TCGA-FG-A6IZ-01
LGG(N=506)	0.2736	3.3521	TCGA-CS-4941-01
LGG(N=506)	0.3253	1.8801	TCGA-DH-A7UT-01
LGG(N=506)	0.2859	1.692	TCGA-DU-5871-01
LGG(N=506)	0.3223	2.128	TCGA-HW-8321-01
LGG(N=506)	0.3039	3.7356	TCGA-EZ-7264-01
LGG(N=506)	0.303	2.6348	TCGA-CS-6666-01
LGG(N=506)	0.3073	3.7269	TCGA-HW-7491-01
LGG(N=506)	0.2989	3.3435	TCGA-S9-A6U1-01
LGG(N=506)	0.3001	2.8117	TCGA-E1-5307-01
LGG(N=506)	0.3227	3.7898	TCGA-DU-A76L-01
LGG(N=506)	0.2961	2.8076	TCGA-HW-7495-01
LGG(N=506)	0.292	2.4252	TCGA-CS-6669-01
LGG(N=506)	0.328	3.5299	TCGA-HT-7481-01
LGG(N=506)	0.3338	3.1637	TCGA-DU-8163-01
LGG(N=506)	0.317	3.8788	TCGA-HT-8110-01
LGG(N=506)	0.3244	3.3675	TCGA-RY-A840-01
LGG(N=506)	0.3188	2.5462	TCGA-VM-A8C9-01
LGG(N=506)	0.3108	3.3407	TCGA-HW-8319-01
LGG(N=506)	0.326	2.8219	TCGA-QH-A6CW-01
LGG(N=506)	0.2838	3.3163	TCGA-DU-5870-01
LGG(N=506)	0.3258	3.2267	TCGA-TM-A84S-01
LGG(N=506)	0.3215	3.0376	TCGA-RY-A845-01
LGG(N=506)	0.3007	3.0199	TCGA-FG-8182-01
LGG(N=506)	0.3084	3.1062	TCGA-FG-6688-01
LGG(N=506)	0.3122	3.3278	TCGA-TQ-A7RP-01
LGG(N=506)	0.3363	2.3953	TCGA-HT-8113-01
LGG(N=506)	0.3139	2.8381	TCGA-HT-7689-01
LGG(N=506)	0.3535	2.6895	TCGA-FG-7638-01
LGG(N=506)	0.3016	4.3385	TCGA-DU-7013-01
LGG(N=506)	0.3266	2.828	TCGA-E1-A7Z3-01
LGG(N=506)	0.3046	2.6371	TCGA-HT-7476-01
LGG(N=506)	0.3074	3.3661	TCGA-TQ-A7RG-01
LGG(N=506)	0.3245	2.8562	TCGA-FG-8181-01
LGG(N=506)	0.3107	3.2677	TCGA-DU-A7T6-01
LGG(N=506)	0.3289	3.5682	TCGA-DB-A4XC-01
LGG(N=506)	0.3281	3.3619	TCGA-FG-A4MW-01
LGG(N=506)	0.2682	3.3321	TCGA-DH-5142-01
LGG(N=506)	0.3006	3.1294	TCGA-S9-A6U2-01
LGG(N=506)	0.3208	2.824	TCGA-TQ-A7RH-01
LGG(N=506)	0.3329	2.108	TCGA-DB-A75M-01
LGG(N=506)	0.3326	2.6738	TCGA-HT-8012-01
LGG(N=506)	0.3171	2.9167	TCGA-S9-A7QW-01
LGG(N=506)	0.325	1.614	TCGA-P5-A733-01
LGG(N=506)	0.3246	2.1213	TCGA-E1-A7Z4-01
LGG(N=506)	0.3103	1.6045	TCGA-DU-A5TR-01
LGG(N=506)	0.3305	2.2299	TCGA-FG-8185-01
LGG(N=506)	0.3379	2.0946	TCGA-HW-8320-01
LGG(N=506)	0.3037	1.5902	TCGA-CS-6667-01
LGG(N=506)	0.2822	2.5731	TCGA-DU-5849-01
LGG(N=506)	0.2803	2.9637	TCGA-DB-5279-01
LGG(N=506)	0.3002	3.2112	TCGA-CS-6670-01
LGG(N=506)	0.3035	2.5061	TCGA-DB-A64V-01
LGG(N=506)	0.2846	3.1426	TCGA-DU-5854-01
LGG(N=506)	0.3079	4.2914	TCGA-DH-A7UR-01
LGG(N=506)	0.3037	3.2511	TCGA-S9-A6WL-01
LGG(N=506)	0.3401	2.2723	TCGA-HT-7880-01
LGG(N=506)	0.267	3.0127	TCGA-E1-5318-01
LGG(N=506)	0.3022	4.1587	TCGA-DU-6393-01
LGG(N=506)	0.2998	2.96	TCGA-DU-5853-01
LGG(N=506)	0.3326	4.4602	TCGA-TM-A84J-01
LGG(N=506)	0.3002	3.5237	TCGA-FG-5962-01
LGG(N=506)	0.3305	2.93	TCGA-F6-A8O4-01
LGG(N=506)	0.3215	2.6441	TCGA-S9-A7R1-01
LGG(N=506)	0.3177	3.9608	TCGA-TM-A84M-01
LGG(N=506)	0.3127	2.3677	TCGA-HT-8107-01
LGG(N=506)	0.3079	3.154	TCGA-P5-A5ET-01
LGG(N=506)	0.322	1.9712	TCGA-P5-A72W-01
LGG(N=506)	0.3158	2.8096	TCGA-FG-A70Y-01
LGG(N=506)	0.3172	2.9432	TCGA-TM-A84R-01
LGG(N=506)	0.2977	2.0465	TCGA-HW-A5KM-01
LGG(N=506)	0.324	4.2533	TCGA-HT-7477-01
LGG(N=506)	0.3257	3.6463	TCGA-FG-A87Q-01
LGG(N=506)	0.3071	3.7815	TCGA-FG-A70Z-01
LGG(N=506)	0.3113	3.7269	TCGA-FG-A4MU-01
LGG(N=506)	0.3091	3.5098	TCGA-DB-A4XB-01
LGG(N=506)	0.3142	2.3048	TCGA-WY-A85D-01
LGG(N=506)	0.3328	2.9507	TCGA-FG-7641-01
LGG(N=506)	0.3001	1.674	TCGA-DU-5872-01
LGG(N=506)	0.3059	2.1345	TCGA-FG-6689-01
LGG(N=506)	0.2819	2.5238	TCGA-DB-5277-01
LGG(N=506)	0.2926	3.1377	TCGA-HT-A615-01
LGG(N=506)	0.3472	2.5585	TCGA-DU-7301-01
LGG(N=506)	0.3161	2.4465	TCGA-P5-A5EW-01
LGG(N=506)	0.3218	2.1702	TCGA-HT-A5RB-01
LGG(N=506)	0.3204	2.5288	TCGA-E1-A7YN-01
LGG(N=506)	0.3276	3.3278	TCGA-QH-A6XC-01
LGG(N=506)	0.306	3.0199	TCGA-S9-A6WN-01
LGG(N=506)	0.298	2.1766	TCGA-DB-A64L-01
LGG(N=506)	0.3189	3.981	TCGA-TM-A84I-01
LGG(N=506)	0.3324	3.6018	TCGA-QH-A6CZ-01
LGG(N=506)	0.3216	1.5465	TCGA-WY-A858-01
LGG(N=506)	0.3204	3.2826	TCGA-VM-A8CB-01
LGG(N=506)	0.3315	1.4704	TCGA-VM-A8CF-01
LGG(N=506)	0.3413	2.9875	TCGA-HT-7608-01
LGG(N=506)	0.303	2.828	TCGA-CS-4938-01
LGG(N=506)	0.3222	2.4571	TCGA-QH-A6X5-01
LGG(N=506)	0.317	2.5972	TCGA-DU-8166-01
LGG(N=506)	0.3227	2.9262	TCGA-HT-8018-01
LGG(N=506)	0.2991	3.3435	TCGA-DU-7292-01
LGG(N=506)	0.3292	1.4494	TCGA-S9-A6TU-01
LGG(N=506)	0.3294	1.9895	TCGA-DB-A75P-01
LGG(N=506)	0.2903	3.4556	TCGA-FG-6691-01
LGG(N=506)	0.303	3.2988	TCGA-DU-6399-01
LGG(N=506)	0.3264	2.694	TCGA-S9-A7IQ-01
LGG(N=506)	0.3054	2.1862	TCGA-S9-A6WI-01
LGG(N=506)	0.3057	2.2783	TCGA-DB-A64S-01
LGG(N=506)	0.2976	3.5994	TCGA-FG-6692-01
LGG(N=506)	0.2992	2.6441	TCGA-HW-7489-01
LGG(N=506)	0.3313	3.1572	TCGA-R8-A6YH-01
LGG(N=506)	0.311	2.1541	TCGA-HT-A618-01
LGG(N=506)	0.2997	1.8119	TCGA-QH-A65S-01
LGG(N=506)	0.32	2.167	TCGA-DU-7019-01
LGG(N=506)	0.3345	4.3263	TCGA-DU-A7TJ-01
LGG(N=506)	0.3296	2.4386	TCGA-TM-A84H-01
LGG(N=506)	0.3175	2.9893	TCGA-S9-A7R8-01
LGG(N=506)	0.3098	2.1213	TCGA-S9-A7R4-01
LGG(N=506)	0.3214	3.4556	TCGA-S9-A7J3-01
LGG(N=506)	0.3247	2.6348	TCGA-TM-A84L-01
LGG(N=506)	0.3282	2.2872	TCGA-E1-A7YH-01
LGG(N=506)	0.3075	3.2915	TCGA-P5-A5EV-01
LGG(N=506)	0.3146	4.2227	TCGA-DU-A7TD-01
LGG(N=506)	0.3049	1.7828	TCGA-HW-A5KL-01
LGG(N=506)	0.3255	3.3787	TCGA-RY-A83X-01
LGG(N=506)	0.3401	3.492	TCGA-HT-7687-01
LGG(N=506)	0.3252	2.6138	TCGA-WY-A85A-01
LGG(N=506)	0.2716	2.8158	TCGA-DB-5281-01
LGG(N=506)	0.3297	2.1476	TCGA-E1-A7YK-01
LGG(N=506)	0.3018	1.9188	TCGA-DU-A5TU-01
LGG(N=506)	0.2979	2.59	TCGA-DU-A7TA-01
LGG(N=506)	0.2735	3.8095	TCGA-CS-5395-01
LGG(N=506)	0.3198	2.2113	TCGA-TQ-A7RR-01
LGG(N=506)	0.3252	2.5948	TCGA-HT-A5R5-01
LGG(N=506)	0.3081	2.2603	TCGA-QH-A65V-01
LGG(N=506)	0.3241	3.5923	TCGA-S9-A6WP-01
LGG(N=506)	0.3013	2.7292	TCGA-S9-A6U5-01
LGG(N=506)	0.321	3.3563	TCGA-E1-A7YO-01
LGG(N=506)	0.3311	3.6509	TCGA-QH-A6X8-01
LGG(N=506)	0.3365	2.9692	TCGA-HT-7610-01
LGG(N=506)	0.3477	3.2065	TCGA-HT-7875-01
LGG(N=506)	0.3192	2.6783	TCGA-R8-A6MK-01
LGG(N=506)	0.3298	2.9525	TCGA-P5-A5F0-01
LGG(N=506)	0.3227	2.872	TCGA-R8-A73M-01
LGG(N=506)	0.3057	1.9527	TCGA-S9-A6TS-01
LGG(N=506)	0.3338	2.3222	TCGA-S9-A6TW-01
LGG(N=506)	0.2619	2.7314	TCGA-E1-5303-01
LGG(N=506)	0.2975	4.2297	TCGA-HT-7606-01
LGG(N=506)	0.3029	3.2018	TCGA-DU-6408-01
LGG(N=506)	0.2944	3.1507	TCGA-FG-5964-01
LGG(N=506)	0.3118	3.186	TCGA-DB-A64Q-01
LGG(N=506)	0.3315	2.8034	TCGA-S9-A7IZ-01
LGG(N=506)	0.2988	3.0757	TCGA-S9-A6WH-01
LGG(N=506)	0.3357	2.3788	TCGA-HT-7602-01
LGG(N=506)	0.3299	3.002	TCGA-DU-A6S8-01
LGG(N=506)	0.3188	2.5972	TCGA-HT-7858-01
LGG(N=506)	0.3097	3.6916	TCGA-HT-7860-01
LGG(N=506)	0.3065	3.6657	TCGA-DU-7006-01
LGG(N=506)	0.2989	2.685	TCGA-TQ-A7RS-01
LGG(N=506)	0.3058	3.0533	TCGA-DU-7009-01
LGG(N=506)	0.3135	3.66	TCGA-DU-7010-01
LGG(N=506)	0.3128	2.6783	TCGA-QH-A6X3-01
LGG(N=506)	0.342	3.2781	TCGA-DU-8164-01
LGG(N=506)	0.3024	3.5449	TCGA-DU-7018-01
LGG(N=506)	0.3173	3.0376	TCGA-RY-A843-01
LGG(N=506)	0.3225	1.5514	TCGA-DU-7014-01
LGG(N=506)	0.3422	2.4412	TCGA-HT-7693-01
LGG(N=506)	0.3098	3.2297	TCGA-FG-A6J3-01
LGG(N=506)	0.3186	2.5238	TCGA-HT-8106-01
LGG(N=506)	0.2962	3.0654	TCGA-HT-7472-01
LGG(N=506)	0.333	1.6649	TCGA-HT-7855-01
LGG(N=506)	0.3259	3.6136	TCGA-DB-A4XG-01
LGG(N=506)	0.3144	3.6486	TCGA-HT-A5RC-01
LGG(N=506)	0.3238	2.3508	TCGA-VM-A8C8-01
LGG(N=506)	0.3192	2.4198	TCGA-HT-7681-01
LGG(N=506)	0.3401	2.4649	TCGA-DU-A6S2-01
LGG(N=506)	0.3361	2.8034	TCGA-DU-7309-01
LGG(N=506)	0.3094	2.108	TCGA-DB-A4XH-01
LGG(N=506)	0.3123	3.3307	TCGA-HT-7485-01
LGG(N=506)	0.3031	2.3077	TCGA-VW-A7QS-01
LGG(N=506)	0.3199	2.2753	TCGA-VV-A86M-01
LGG(N=506)	0.321	4.6212	TCGA-E1-A7YV-01
LGG(N=506)	0.3085	3.5706	TCGA-HT-7468-01
LGG(N=506)	0.3353	3.5237	TCGA-HT-7677-01
LGG(N=506)	0.3033	2.5388	TCGA-DU-A5TY-01
LGG(N=506)	0.3149	2.8622	TCGA-HT-8109-01
LGG(N=506)	0.3132	2.118	TCGA-HT-7479-01
LGG(N=506)	0.2726	3.0825	TCGA-DB-5275-01
LGG(N=506)	0.3311	2.578	TCGA-TM-A7C4-01
LGG(N=506)	0.3194	3.5875	TCGA-DH-A7UU-01
LGG(N=506)	0.3128	2.3788	TCGA-HT-A4DV-01
LGG(N=506)	0.3213	2.9128	TCGA-FG-8186-01
LGG(N=506)	0.2957	3.186	TCGA-FG-A4MT-01
LGG(N=506)	0.3067	3.3221	TCGA-E1-5305-01
LGG(N=506)	0.2715	2.4306	TCGA-CS-5393-01
LGG(N=506)	0.2954	2.6371	TCGA-DU-6395-01
LGG(N=506)	0.3072	1.6187	TCGA-DB-A64X-01
LGG(N=506)	0.3268	4.7367	TCGA-S9-A7IS-01
LGG(N=506)	0.3203	3.0163	TCGA-HT-7856-01
LGG(N=506)	0.3085	2.5437	TCGA-QH-A6XA-01
LGG(N=506)	0.3201	2.2144	TCGA-P5-A77W-01
LGG(N=506)	0.281	3.2959	TCGA-CS-4942-01
LGG(N=506)	0.2942	3.4411	TCGA-CS-6186-01
LGG(N=506)	0.3056	3.4358	TCGA-DU-7008-01
LGG(N=506)	0.3311	2.8701	TCGA-HT-7688-01
LGG(N=506)	0.3095	2.9205	TCGA-DU-A7T8-01
LGG(N=506)	0.3307	2.2663	TCGA-DU-A6S3-01
LGG(N=506)	0.3034	2.7117	TCGA-DB-A64U-01
LGG(N=506)	0.2984	5.0756	TCGA-HT-A61C-01
LGG(N=506)	0.3059	2.876	TCGA-TQ-A7RF-01
LGG(N=506)	0.3289	3.4752	TCGA-F6-A8O3-01
LGG(N=506)	0.3103	3.1829	TCGA-R8-A6ML-01
LGG(N=506)	0.3051	2.8219	TCGA-DU-A5TT-01
LGG(N=506)	0.3252	2.6962	TCGA-QH-A870-01
LGG(N=506)	0.3276	2.376	TCGA-DB-A75O-01
LGG(N=506)	0.322	3.034	TCGA-HT-8111-01
LGG(N=506)	0.3165	3.1491	TCGA-S9-A7QZ-01
LGG(N=506)	0.2724	2.7636	TCGA-DB-5273-01
LGG(N=506)	0.3411	2.8381	TCGA-HT-7470-01
LGG(N=506)	0.3172	2.4386	TCGA-FG-A4MY-01
LGG(N=506)	0.3235	2.7401	TCGA-HT-8108-01
LGG(N=506)	0.2953	3.741	TCGA-DB-A4XE-01
LGG(N=506)	0.3359	4.1359	TCGA-HT-A4DS-01
LGG(N=506)	0.345	3.208	TCGA-DU-8158-01
LGG(N=506)	0.3025	2.4386	TCGA-HT-7474-01
LGG(N=506)	0.2646	2.9338	TCGA-DH-5143-01
LGG(N=506)	0.2963	2.6418	TCGA-TQ-A7RJ-01
LGG(N=506)	0.3143	2.0979	TCGA-S9-A7QY-01
LGG(N=506)	0.306	2.7993	TCGA-DB-A4XA-01
LGG(N=506)	0.3289	2.3423	TCGA-P5-A731-01
LGG(N=506)	0.3292	3.3633	TCGA-E1-A7YE-01
LGG(N=506)	0.3077	3.0893	TCGA-FG-A710-01
LGG(N=506)	0.3236	2.7636	TCGA-HT-8010-01
LGG(N=506)	0.3023	2.7572	TCGA-DU-7299-01
LGG(N=506)	0.2639	2.5683	TCGA-DB-5270-01
LGG(N=506)	0.3322	3.4907	TCGA-KT-A74X-01
LGG(N=506)	0.3292	2.7379	TCGA-DB-A75L-01
LGG(N=506)	0.2961	2.2237	TCGA-HT-A616-01
LGG(N=506)	0.3281	2.5288	TCGA-HT-A74K-01
LGG(N=506)	0.3184	2.0776	TCGA-WY-A85C-01
LGG(N=506)	0.3307	2.6348	TCGA-FG-8188-01
LGG(N=506)	0.3117	2.8877	TCGA-DU-A6S7-01
LGG(N=506)	0.3004	3.1245	TCGA-DU-7294-01
LGG(N=506)	0.268	2.7444	TCGA-DB-5274-01
LGG(N=506)	0.3542	3.2359	TCGA-HT-7604-01
LGG(N=506)	0.3261	3.0859	TCGA-TM-A84F-01
LGG(N=506)	0.3045	2.5338	TCGA-DB-A64O-01
LGG(N=506)	0.3233	2.982	TCGA-HT-7884-01
LGG(N=506)	0.308	2.7336	TCGA-S9-A6WE-01
LGG(N=506)	0.3068	2.6647	TCGA-QH-A6CY-01
LGG(N=506)	0.3107	3.8411	TCGA-S9-A6WM-01
LGG(N=506)	0.3277	4.1628	TCGA-HT-A5RA-01
LGG(N=506)	0.3116	3.6703	TCGA-QH-A6CV-01
LGG(N=506)	0.315	2.6805	TCGA-VM-A8CE-01
LGG(N=506)	0.2992	3.5362	TCGA-DU-5852-01
LGG(N=506)	0.3156	2.5536	TCGA-P5-A72U-01
LGG(N=506)	0.3281	2.7508	TCGA-DB-A75K-01
LGG(N=506)	0.3115	3.5959	TCGA-DU-6410-01
LGG(N=506)	0.3006	2.6873	TCGA-QH-A65Z-01
LGG(N=506)	0.3209	2.6693	TCGA-S9-A7IY-01
LGG(N=506)	0.3122	2.6602	TCGA-P5-A781-01
LGG(N=506)	0.3214	4.1027	TCGA-TM-A84G-01
LGG(N=506)	0.3076	2.8582	TCGA-HW-A5KK-01
LGG(N=506)	0.2577	3.1523	TCGA-E1-5311-01
LGG(N=506)	0.3424	3.7688	TCGA-FG-7634-01
LGG(N=506)	0.2913	2.0844	TCGA-DU-5855-01
LGG(N=506)	0.2915	2.1702	TCGA-DU-6396-01
LGG(N=506)	0.3356	2.8916	TCGA-FG-7643-01
LGG(N=506)	0.3227	2.6043	TCGA-TM-A84C-01
LGG(N=506)	0.3171	2.7889	TCGA-WY-A85E-01
LGG(N=506)	0.3159	3.8876	TCGA-DU-7298-01
LGG(N=506)	0.3181	2.05	TCGA-TM-A84T-01
LGG(N=506)	0.3339	2.9413	TCGA-FG-7637-01
LGG(N=506)	0.3315	3.4945	TCGA-HT-A5R9-01
LGG(N=506)	0.3017	2.5536	TCGA-HT-A614-01
LGG(N=506)	0.3077	3.0706	TCGA-QH-A65R-01
LGG(N=506)	0.3257	3.0961	TCGA-FG-A60J-01
LGG(N=506)	0.3082	2.8858	TCGA-FG-8189-01
LGG(N=506)	0.295	2.6371	TCGA-P5-A5EY-01
LGG(N=506)	0.3004	2.5238	TCGA-HT-7882-01
LGG(N=506)	0.3254	4.6502	TCGA-HT-8011-01
LGG(N=506)	0.2917	3.5559	TCGA-DU-6394-01
LGG(N=506)	0.3152	3.1112	TCGA-WY-A859-01
LGG(N=506)	0.3309	2.7572	TCGA-WY-A85B-01
LGG(N=506)	0.3065	3.5449	TCGA-S9-A6UB-01
LGG(N=506)	0.2982	3.3717	TCGA-S9-A6U6-01
LGG(N=506)	0.3378	4.4344	TCGA-DU-8168-01
LGG(N=506)	0.2983	3.0481	TCGA-DU-7290-01
LGG(N=506)	0.2971	3.5387	TCGA-DU-6407-01
LGG(N=506)	0.3289	3.0463	TCGA-HT-7601-01
LGG(N=506)	0.2843	4.6804	TCGA-DU-6403-01
LGG(N=506)	0.3077	2.7679	TCGA-DB-A64R-01
LGG(N=506)	0.3293	3.1924	TCGA-E1-A7YQ-01
LGG(N=506)	0.2937	4.1103	TCGA-DU-6405-01
LGG(N=506)	0.2926	2.4225	TCGA-HW-7487-01
LGG(N=506)	0.3214	2.4701	TCGA-S9-A7R2-01
LGG(N=506)	0.3272	3.1011	TCGA-S9-A7J1-01
LGG(N=506)	0.3191	2.2663	TCGA-P5-A72X-01
LGG(N=506)	0.3257	3.4596	TCGA-E1-A7YJ-01
LGG(N=506)	0.3378	2.7993	TCGA-HT-7690-01
LGG(N=506)	0.3369	2.7993	TCGA-HT-8105-01
LGG(N=506)	0.3106	3.034	TCGA-E1-A7YY-01
LGG(N=506)	0.3159	3.1311	TCGA-HT-A619-01
LGG(N=506)	0.2966	3.1844	TCGA-DU-6400-01
LGG(N=506)	0.3204	2.9948	TCGA-P5-A737-01
LGG(N=506)	0.3147	3.0428	TCGA-RY-A83Y-01
LGG(N=506)	0.4513	3.055	TCGA-HT-8564-01
LGG(N=506)	0.3197	2.3871	TCGA-HT-7686-01
LGG(N=506)	0.3181	3.3492	TCGA-E1-A7YM-01
LGG(N=506)	0.3079	2.4252	TCGA-DH-A66F-01
LGG(N=506)	0.2623	3.3911	TCGA-CS-5390-01
LGG(N=506)	0.2953	3.5324	TCGA-S9-A6UA-01
LGG(N=506)	0.3341	4.5547	TCGA-FG-A87N-01
LGG(N=506)	0.3226	3.0533	TCGA-VV-A829-01
LGG(N=506)	0.3027	2.8381	TCGA-DH-A66B-01
LGG(N=506)	0.3312	2.9655	TCGA-HT-A5R7-01
LGG(N=506)	0.3295	3.6405	TCGA-CS-5394-01
LGG(N=506)	0.312	2.8562	TCGA-DH-A66D-01
LGG(N=506)	0.3151	3.154	TCGA-HT-7877-01
LGG(N=506)	0.3062	3.1228	TCGA-DU-6542-01
LGG(N=506)	0.3038	2.3048	TCGA-QH-A6CS-01
LGG(N=506)	0.3198	3.5174	TCGA-E1-A7YU-01
LGG(N=506)	0.3258	2.8321	TCGA-W9-A837-01
LGG(N=506)	0.3523	3.0181	TCGA-IK-7675-01
LGG(N=506)	0.3466	2.5263	TCGA-DU-7306-01
LGG(N=506)	0.3346	2.9784	TCGA-QH-A6X9-01
LGG(N=506)	0.3121	3.4556	TCGA-S9-A6U0-01
LGG(N=506)	0.3385	2.7636	TCGA-HT-7611-01
LGG(N=506)	0.3165	3.0791	TCGA-S9-A6TY-01
LGG(N=506)	0.2925	2.6161	TCGA-DU-A7TB-01
LGG(N=506)	0.3048	3.0774	TCGA-IK-8125-01
LGG(N=506)	0.3211	1.4547	TCGA-WH-A86K-01
LGG(N=506)	0.2583	2.0218	TCGA-DH-5141-01
LGG(N=506)	0.3126	2.5163	TCGA-FG-A60L-01
LGG(N=506)	0.2732	2.5288	TCGA-DB-5280-01
LGG(N=506)	0.3186	3.7149	TCGA-S9-A7IX-01
LGG(N=506)	0.2951	3.0498	TCGA-FG-5965-01
LGG(N=506)	0.3526	2.1378	TCGA-P5-A5F6-01
LGG(N=506)	0.3159	2.5036	TCGA-DU-7007-01
LGG(N=506)	0.3003	1.2271	TCGA-HW-7490-01
LGG(N=506)	0.3077	4.1111	TCGA-CS-6188-01
LGG(N=506)	0.3029	3.9938	TCGA-CS-6668-01
LGG(N=506)	0.3305	4.0722	TCGA-DU-8165-01
LGG(N=506)	0.3302	2.4386	TCGA-HT-7692-01
LGG(N=506)	0.3073	5.3862	TCGA-TQ-A7RM-01
LGG(N=506)	0.3379	3.6972	TCGA-DU-8161-01
LGG(N=506)	0.331	1.6512	TCGA-P5-A736-01
LGG(N=506)	0.2918	1.0847	TCGA-DU-6401-01
LGG(N=506)	0.3187	2.1606	TCGA-HT-A74H-01
LGG(N=506)	0.3217	2.6138	TCGA-TQ-A7RV-01
LGG(N=506)	0.2932	2.982	TCGA-HT-7483-01
LGG(N=506)	0.3037	2.7139	TCGA-HT-7620-01
LGG(N=506)	0.3363	2.8622	TCGA-HT-7480-01
LGG(N=506)	0.3264	4.9426	TCGA-S9-A7J0-01
LGG(N=506)	0.325	2.945	TCGA-TM-A84Q-01
LGG(N=506)	0.3174	2.7051	TCGA-RY-A847-01
LGG(N=506)	0.3177	3.4971	TCGA-TQ-A7RQ-01
LGG(N=506)	0.307	3.0074	TCGA-TQ-A7RW-01
LGG(N=506)	0.3244	2.4412	TCGA-FG-8191-01
LGG(N=506)	0.3285	2.9692	TCGA-E1-A7YW-01
LGG(N=506)	0.2659	2.8482	TCGA-DB-5278-01
LGG(N=506)	0.325	3.7094	TCGA-E1-A7YS-01
LGG(N=506)	0.353	3.1045	TCGA-HT-7695-01
LGG(N=506)	0.3339	3.2267	TCGA-DU-7012-01
LGG(N=506)	0.3098	2.909	TCGA-HT-7879-01
LGG(N=506)	0.3255	2.6278	TCGA-DU-A7TC-01
LGG(N=506)	0.3507	2.685	TCGA-HT-7680-01
LGG(N=506)	0.3146	3.4622	TCGA-DB-A4X9-01
LGG(N=506)	0.324	3.011	TCGA-TQ-A7RI-01
LGG(N=506)	0.3096	2.9243	TCGA-TM-A7CA-01
LGG(N=506)	0.3124	3.1604	TCGA-QH-A86X-01
LGG(N=506)	0.3275	3.3076	TCGA-DU-A76R-01
LGG(N=506)	0.2628	3.0671	TCGA-DH-5144-01
LGG(N=506)	0.3159	3.7335	TCGA-E1-A7Z2-01
LGG(N=506)	0.3051	2.5288	TCGA-DU-A5TP-01
LGG(N=506)	0.3327	2.5112	TCGA-FG-8187-01
LGG(N=506)	0.2753	5.1351	TCGA-E1-5304-01
LGG(N=506)	0.2751	4.2803	TCGA-CS-4943-01
LGG(N=506)	0.2629	4.5596	TCGA-DH-5140-01
LGG(N=506)	0.3249	1.9452	TCGA-TM-A7CF-01
LGG(N=506)	0.2996	3.0842	TCGA-DH-A7US-01
LGG(N=506)	0.3194	3.0074	TCGA-HT-A61B-01
LGG(N=506)	0.3107	2.5388	TCGA-E1-A7Z6-01
LGG(N=506)	0.3135	2.4063	TCGA-HT-7857-01
LGG(N=506)	0.3071	2.8055	TCGA-E1-5319-01
LGG(N=506)	0.3178	1.3956	TCGA-DU-A5TS-01
LGG(N=506)	0.5506	3.3563	TCGA-DU-6392-01
LGG(N=506)	0.3199	1.7273	TCGA-QH-A6CU-01
LGG(N=506)	0.2898	3.2251	TCGA-DU-6404-01
LGG(N=506)	0.3289	3.4477	TCGA-VW-A8FI-01
LGG(N=506)	0.3207	3.3278	TCGA-HT-A74L-01
LGG(N=506)	0.3157	4.2434	TCGA-P5-A5EU-01
LGG(N=506)	0.3087	2.1247	TCGA-P5-A5EZ-01
LGG(N=506)	0.3042	3.2267	TCGA-S9-A89Z-01
LGG(N=506)	0.3258	2.6019	TCGA-S9-A6TZ-01
LGG(N=506)	0.2997	3.6635	TCGA-FG-5963-01
LGG(N=506)	0.307	2.4063	TCGA-HT-A61A-01
LGG(N=506)	0.3258	2.0912	TCGA-S9-A89V-01
LGG(N=506)	0.3127	4.3456	TCGA-DB-A64W-01
LGG(N=506)	0.2943	1.5115	TCGA-FG-A4MX-01
LGG(N=506)	0.3185	3.3703	TCGA-P5-A72Z-01
LGG(N=506)	0.3168	2.3843	TCGA-HT-8114-01
LGG(N=506)	0.323	2.5561	TCGA-HT-7881-01
LGG(N=506)	0.2697	1.8201	TCGA-CS-4944-01
LGG(N=506)	0.3129	2.4727	TCGA-S9-A7QX-01
LGG(N=506)	0.3196	2.5087	TCGA-DU-A7TG-01
LGG(N=506)	0.3014	4.0118	TCGA-DU-5874-01
LGG(N=506)	0.3362	2.8994	TCGA-TQ-A8XE-01
LGG(N=506)	0.3353	2.9674	TCGA-DU-7300-01
LGG(N=506)	0.3431	2.9356	TCGA-HT-7694-01
LGG(N=506)	0.3498	4.0748	TCGA-HT-7471-01
LGG(N=506)	0.3121	2.9469	TCGA-DB-A4XD-01
LGG(N=506)	0.3029	3.0688	TCGA-TQ-A7RK-01
LGG(N=506)	0.3106	2.6371	TCGA-HT-7475-01
LGG(N=506)	0.3066	3.7614	TCGA-TQ-A7RO-01
LGG(N=506)	0.3317	2.7292	TCGA-HT-7902-01
LGG(N=506)	0.2984	2.9911	TCGA-FG-A711-01
LGG(N=506)	0.2762	2.5948	TCGA-DB-5276-01
LGG(N=506)	0.3176	2.3394	TCGA-P5-A730-01
LGG(N=506)	0.3261	4.2736	TCGA-E1-A7YD-01
LGG(N=506)	0.3228	2.1574	TCGA-HT-A74O-01
LGG(N=506)	0.3105	3.1045	TCGA-HT-8015-01
LGG(N=506)	0.3272	2.5487	TCGA-HT-A74J-01
LGG(N=506)	0.323	4.1036	TCGA-DH-A669-01
LGG(N=506)	0.3049	2.6715	TCGA-HT-A617-01
LGG(N=506)	0.3393	2.7073	TCGA-HT-7605-01
LGG(N=506)	0.3207	2.7805	TCGA-S9-A6WO-01
LGG(N=506)	0.3271	2.7183	TCGA-QH-A6CX-01
LGG(N=506)	0.3366	2.6255	TCGA-P5-A5F4-01
LGG(N=506)	0.3053	3.2174	TCGA-DU-A76K-01
LGG(N=506)	0.3204	2.2931	TCGA-VM-A8CH-01
LGG(N=506)	0.3513	2.004	TCGA-HT-7609-01
LGG(N=506)	0.3233	3.2915	TCGA-QH-A6X4-01
LGG(N=506)	0.3082	2.036	TCGA-DH-A7UV-01
LGG(N=506)	0.3229	2.93	TCGA-TM-A7C3-01
LGG(N=506)	0.3054	3.5645	TCGA-S9-A6WG-01
LGG(N=506)	0.3072	3.1442	TCGA-FG-6690-01
LGG(N=506)	0.3418	2.4386	TCGA-DU-8167-01
LGG(N=506)	0.3232	2.7657	TCGA-QH-A65X-01
LGG(N=506)	0.3274	1.7617	TCGA-P5-A780-01
LGG(N=506)	0.2649	3.417	TCGA-E1-5302-01
LGG(N=506)	0.3105	1.7009	TCGA-HW-A5KJ-01
LGG(N=506)	0.3072	2.9356	TCGA-R8-A6MO-01
LGG(N=506)	0.3321	2.5511	TCGA-FG-7636-01
LGG(N=506)	0.2888	2.1147	TCGA-CS-6290-01
LGG(N=506)	0.2986	3.9327	TCGA-DU-5847-01
LGG(N=506)	0.3013	4.6514	TCGA-DU-6406-01
LGG(N=506)	0.3428	3.7028	TCGA-TM-A84B-01
CESC(N=302)	0.3075	3.091	TCGA-EK-A2RE-01
CESC(N=302)	0.2696	3.6486	TCGA-IR-A3L7-01
CESC(N=302)	0.3347	4.2312	TCGA-Q1-A73Q-01
CESC(N=302)	0.2893	2.5924	TCGA-C5-A1MF-01
CESC(N=302)	0.3614	3.162	TCGA-ZJ-A8QQ-01
CESC(N=302)	0.3165	3.2632	TCGA-EX-A3L1-01
CESC(N=302)	0.3032	4.0515	TCGA-JW-A5VI-01
CESC(N=302)	0.3046	4.1027	TCGA-EA-A1QT-01
CESC(N=302)	0.3275	2.3898	TCGA-UC-A7PG-01
CESC(N=302)	0.3389	3.4358	TCGA-EA-A97N-01
CESC(N=302)	0.3074	3.1228	TCGA-EA-A3QD-01
CESC(N=302)	0.2908	3.0757	TCGA-C5-A1ME-01
CESC(N=302)	0.3465	4.0867	TCGA-C5-A8YR-01
CESC(N=302)	0.2933	2.826	TCGA-FU-A40J-01
CESC(N=302)	0.3227	4.4608	TCGA-VS-A9V5-01
CESC(N=302)	0.3546	4.1587	TCGA-MY-A913-01
CESC(N=302)	0.3291	3.4661	TCGA-VS-A8Q9-01
CESC(N=302)	0.2782	3.6861	TCGA-DS-A0VL-01
CESC(N=302)	0.3285	2.6895	TCGA-VS-A9UU-01
CESC(N=302)	0.3375	2.7444	TCGA-ZJ-AAXN-01
CESC(N=302)	0.5605	4.0782	TCGA-VS-A9U6-01
CESC(N=302)	0.3206	3.5035	TCGA-C5-A2LX-01
CESC(N=302)	0.2954	3.3535	TCGA-C5-A1M8-01
CESC(N=302)	0.3296	3.1245	TCGA-C5-A7CJ-01
CESC(N=302)	0.3659	3.7961	TCGA-GH-A9DA-01
CESC(N=302)	0.305	3.5473	TCGA-EA-A5O9-01
CESC(N=302)	0.3348	2.9747	TCGA-Q1-A73P-01
CESC(N=302)	0.335	3.9901	TCGA-C5-A8XK-01
CESC(N=302)	0.3693	3.5098	TCGA-C5-A907-01
CESC(N=302)	0.3302	3.9346	TCGA-VS-A9UD-01
CESC(N=302)	0.3387	2.7847	TCGA-C5-A7CM-01
CESC(N=302)	0.357	3.5633	TCGA-VS-A9V2-01
CESC(N=302)	0.3511	3.9636	TCGA-VS-A94Y-01
CESC(N=302)	0.3665	3.6759	TCGA-C5-A8ZZ-01
CESC(N=302)	0.6007	3.8621	TCGA-VS-A9UJ-01
CESC(N=302)	0.3363	2.651	TCGA-ZJ-AAXI-01
CESC(N=302)	0.3322	4.0019	TCGA-Q1-A6DT-01
CESC(N=302)	0.3205	3.868	TCGA-VS-A9UQ-01
CESC(N=302)	0.3384	3.7815	TCGA-VS-A8EG-01
CESC(N=302)	0.3416	3.0859	TCGA-EX-A69L-01
CESC(N=302)	0.3415	3.1523	TCGA-Q1-A73O-01
CESC(N=302)	0.3742	3.154	TCGA-VS-A8QC-01
CESC(N=302)	0.2973	2.6019	TCGA-EA-A5ZE-01
CESC(N=302)	0.3489	4.6826	TCGA-ZJ-A8QO-01
CESC(N=302)	0.2794	3.3134	TCGA-JX-A5QV-01
CESC(N=302)	0.2876	3.3591	TCGA-EK-A2GZ-01
CESC(N=302)	0.3074	3.4622	TCGA-EK-A2R9-01
CESC(N=302)	0.2757	2.9839	TCGA-IR-A3LL-01
CESC(N=302)	0.2847	3.3336	TCGA-C5-A1M5-01
CESC(N=302)	0.3285	2.8462	TCGA-C5-A7X8-01
CESC(N=302)	0.5382	3.3856	TCGA-EA-A3HS-01
CESC(N=302)	0.3014	2.7931	TCGA-IR-A3LH-01
CESC(N=302)	0.2925	4.0091	TCGA-C5-A1M9-01
CESC(N=302)	0.3112	2.9729	TCGA-DG-A2KJ-01
CESC(N=302)	0.2933	3.9147	TCGA-Q1-A5R3-01
CESC(N=302)	0.3047	3.644	TCGA-HG-A2PA-01
CESC(N=302)	0.2901	3.091	TCGA-EA-A50E-01
CESC(N=302)	0.2958	3.1228	TCGA-EA-A556-01
CESC(N=302)	0.3211	4.1441	TCGA-VS-A9V3-01
CESC(N=302)	0.3232	3.4129	TCGA-VS-A9UH-01
CESC(N=302)	0.2881	2.6693	TCGA-JX-A3PZ-01
CESC(N=302)	0.2969	2.7051	TCGA-C5-A1MP-01
CESC(N=302)	0.3643	2.872	TCGA-MU-A5YI-01
CESC(N=302)	0.3317	4.3834	TCGA-VS-A8QA-01
CESC(N=302)	0.2933	2.8779	TCGA-FU-A5XV-01
CESC(N=302)	0.3553	2.6418	TCGA-EX-A8YF-01
CESC(N=302)	0.3477	3.4371	TCGA-ZJ-A8QR-01
CESC(N=302)	0.2895	2.6278	TCGA-IR-A3LB-01
CESC(N=302)	0.3039	3.6207	TCGA-EK-A2PI-01
CESC(N=302)	0.3278	3.0217	TCGA-HM-A6W2-01
CESC(N=302)	0.3012	3.4843	TCGA-IR-A3LF-01
CESC(N=302)	0.3003	3.793	TCGA-HM-A4S6-01
CESC(N=302)	0.3523	2.9488	TCGA-VS-A8QF-01
CESC(N=302)	0.3141	3.287	TCGA-VS-AA62-01
CESC(N=302)	0.3301	4.01	TCGA-C5-A7UE-01
CESC(N=302)	0.3085	2.5238	TCGA-DS-A5RQ-01
CESC(N=302)	0.2866	3.4398	TCGA-BI-A20A-01
CESC(N=302)	0.4804	4.0601	TCGA-EA-A3HU-01
CESC(N=302)	0.3052	3.8749	TCGA-EK-A2RM-01
CESC(N=302)	0.2818	3.6428	TCGA-DG-A2KK-01
CESC(N=302)	0.3109	4.3492	TCGA-C5-A1MI-01
CESC(N=302)	0.3342	3.7237	TCGA-JW-A852-01
CESC(N=302)	0.3202	3.0376	TCGA-EK-A2RA-01
CESC(N=302)	0.3	3.4804	TCGA-EK-A2RB-01
CESC(N=302)	0.2916	3.6771	TCGA-C5-A1MJ-01
CESC(N=302)	0.2937	2.5487	TCGA-MY-A5BE-01
CESC(N=302)	0.2796	3.4384	TCGA-C5-A1BE-01
CESC(N=302)	0.3333	4.3965	TCGA-ZJ-AAXT-01
CESC(N=302)	0.3289	3.8471	TCGA-LP-A7HU-01
CESC(N=302)	0.6087	3.7919	TCGA-2W-A8YY-01
CESC(N=302)	0.2726	3.8451	TCGA-EA-A411-01
CESC(N=302)	0.305	4.1277	TCGA-C5-A1MN-01
CESC(N=302)	0.3151	4.3378	TCGA-C5-A2M2-01
CESC(N=302)	0.3035	2.9375	TCGA-EK-A2PK-01
CESC(N=302)	0.9845	4.4344	TCGA-EA-A410-01
CESC(N=302)	0.3351	4.5361	TCGA-VS-A952-01
CESC(N=302)	0.2902	3.0428	TCGA-EK-A2IP-01
CESC(N=302)	0.326	3.4371	TCGA-EK-A2PG-01
CESC(N=302)	0.2853	3.3717	TCGA-FU-A3YQ-01
CESC(N=302)	0.3318	3.2343	TCGA-DS-A1OB-01
CESC(N=302)	0.3262	3.6827	TCGA-VS-A959-01
CESC(N=302)	0.3033	2.5707	TCGA-EK-A2R7-01
CESC(N=302)	0.2806	3.838	TCGA-JW-A5VJ-01
CESC(N=302)	0.3271	4.3082	TCGA-C5-A7UH-01
CESC(N=302)	0.3356	4.4236	TCGA-MA-AA3Z-01
CESC(N=302)	0.3293	3.6894	TCGA-VS-A9UR-01
CESC(N=302)	0.2911	2.8877	TCGA-EK-A3GN-01
CESC(N=302)	0.3092	3.0305	TCGA-DS-A3LQ-01
CESC(N=302)	0.3135	2.9186	TCGA-ZJ-AAXU-01
CESC(N=302)	0.3393	4.0028	TCGA-VS-A9UY-01
CESC(N=302)	0.338	3.4739	TCGA-ZJ-AAXA-01
CESC(N=302)	0.2987	3.5523	TCGA-EK-A2RO-01
CESC(N=302)	0.2799	3.5035	TCGA-DS-A0VM-01
CESC(N=302)	0.2994	3.9901	TCGA-EX-A1H5-01
CESC(N=302)	0.2869	2.8955	TCGA-FU-A3EO-01
CESC(N=302)	0.2842	3.3773	TCGA-EK-A2RK-01
CESC(N=302)	0.2885	3.3773	TCGA-C5-A1BL-01
CESC(N=302)	0.3415	3.863	TCGA-Q1-A73S-01
CESC(N=302)	0.3559	2.872	TCGA-PN-A8MA-01
CESC(N=302)	0.3273	3.9496	TCGA-DS-A7WF-01
CESC(N=302)	0.323	3.4596	TCGA-C5-A7X3-01
CESC(N=302)	0.2708	2.7551	TCGA-HM-A3JK-01
CESC(N=302)	0.3354	2.2901	TCGA-ZJ-AAXJ-01
CESC(N=302)	0.3263	3.6657	TCGA-VS-A9V1-01
CESC(N=302)	0.3043	3.7992	TCGA-FU-A3HZ-01
CESC(N=302)	0.3311	2.96	TCGA-EA-A78R-01
CESC(N=302)	0.2888	3.9403	TCGA-JW-A5VG-01
CESC(N=302)	0.3483	4.1523	TCGA-VS-A9UV-01
CESC(N=302)	0.3144	3.7204	TCGA-C5-A8YT-01
CESC(N=302)	0.329	2.8502	TCGA-ZX-AA5X-01
CESC(N=302)	0.3275	3.5473	TCGA-VS-A958-01
CESC(N=302)	0.3536	3.3134	TCGA-VS-A8EL-01
CESC(N=302)	0.3384	3.7992	TCGA-ZJ-AB0I-01
CESC(N=302)	0.2977	3.3717	TCGA-C5-A2LZ-01
CESC(N=302)	0.3249	4.3292	TCGA-VS-A950-01
CESC(N=302)	0.3007	3.4752	TCGA-IR-A3LK-01
CESC(N=302)	0.3283	4.0969	TCGA-DS-A1OC-01
CESC(N=302)	0.3057	2.2482	TCGA-C5-A3HE-01
CESC(N=302)	0.3341	3.29	TCGA-MA-AA3W-01
CESC(N=302)	0.3387	5.3646	TCGA-VS-A9UL-01
CESC(N=302)	0.3477	4.2134	TCGA-VS-A9UO-01
CESC(N=302)	0.3389	3.7335	TCGA-C5-A8XJ-01
CESC(N=302)	0.3359	3.2617	TCGA-C5-A7CL-01
CESC(N=302)	0.2968	3.0181	TCGA-FU-A3NI-01
CESC(N=302)	0.3028	4.0858	TCGA-EA-A439-01
CESC(N=302)	0.3468	4.0567	TCGA-VS-A9V0-01
CESC(N=302)	0.2764	3.4264	TCGA-EK-A3GK-01
CESC(N=302)	0.3429	3.1228	TCGA-C5-A7CG-01
CESC(N=302)	0.2798	3.2313	TCGA-C5-A1BI-01
CESC(N=302)	0.2825	3.3464	TCGA-HM-A3JJ-01
CESC(N=302)	0.3423	3.47	TCGA-C5-A7UI-01
CESC(N=302)	0.3529	3.0893	TCGA-ZJ-AAXD-01
CESC(N=302)	0.3001	3.6463	TCGA-EK-A2R8-01
CESC(N=302)	0.3444	4.4816	TCGA-VS-A9UP-01
CESC(N=302)	0.2826	2.6395	TCGA-C5-A1BF-01
CESC(N=302)	0.3311	2.5213	TCGA-EX-A69M-01
CESC(N=302)	0.2864	3.034	TCGA-EA-A5ZD-01
CESC(N=302)	0.2909	3.4384	TCGA-JX-A3Q0-01
CESC(N=302)	0.2912	3.7313	TCGA-BI-A0VS-01
CESC(N=302)	0.3713	2.8055	TCGA-VS-A8EJ-01
CESC(N=302)	0.2868	3.7888	TCGA-DR-A0ZL-01
CESC(N=302)	0.3372	4.4443	TCGA-MA-AA41-01
CESC(N=302)	0.2927	3.3619	TCGA-EA-A3HQ-01
CESC(N=302)	0.2784	2.9109	TCGA-LP-A5U2-01
CESC(N=302)	0.2851	4.0841	TCGA-EA-A43B-01
CESC(N=302)	0.3026	3.865	TCGA-C5-A3HD-01
CESC(N=302)	0.29	2.4805	TCGA-IR-A3LI-01
CESC(N=302)	0.3408	3.551	TCGA-VS-A8EI-01
CESC(N=302)	0.2828	3.1311	TCGA-EA-A4BA-01
CESC(N=302)	0.291	3.4331	TCGA-C5-A3HL-01
CESC(N=302)	0.3042	2.4934	TCGA-EA-A3Y4-01
CESC(N=302)	0.3284	3.5299	TCGA-UC-A7PF-01
CESC(N=302)	0.3529	4.847	TCGA-VS-A9UB-01
CESC(N=302)	0.3359	3.5424	TCGA-UC-A7PI-01
CESC(N=302)	0.3022	2.8701	TCGA-DG-A2KL-01
CESC(N=302)	0.3434	3.335	TCGA-JW-AAVH-01
CESC(N=302)	0.3057	2.9984	TCGA-MY-A5BF-01
CESC(N=302)	0.2729	3.7888	TCGA-Q1-A5R1-01
CESC(N=302)	0.3062	2.5536	TCGA-FU-A57G-01
CESC(N=302)	0.2941	3.0446	TCGA-C5-A1BQ-01
CESC(N=302)	0.2966	2.8779	TCGA-EK-A2PL-01
CESC(N=302)	0.3345	3.9393	TCGA-Q1-A6DW-01
CESC(N=302)	0.3047	4.1294	TCGA-C5-A2M1-01
CESC(N=302)	0.3338	1.9415	TCGA-R2-A69V-01
CESC(N=302)	0.3186	3.5262	TCGA-EA-A5ZF-01
CESC(N=302)	0.3109	3.3938	TCGA-FU-A23L-01
CESC(N=302)	0.3141	3.6474	TCGA-DS-A1OA-01
CESC(N=302)	0.2826	4.1595	TCGA-EK-A2H1-01
CESC(N=302)	0.2768	3.287	TCGA-LP-A4AU-01
CESC(N=302)	0.3445	3.6184	TCGA-VS-A9U7-01
CESC(N=302)	0.2856	3.2766	TCGA-C5-A2LS-01
CESC(N=302)	0.335	3.7453	TCGA-MA-AA3Y-01
CESC(N=302)	0.2812	2.6533	TCGA-DG-A2KM-01
CESC(N=302)	0.2906	2.9747	TCGA-C5-A3HF-01
CESC(N=302)	0.3178	2.824	TCGA-C5-A2LT-01
CESC(N=302)	0.2916	2.7615	TCGA-C5-A1BK-01
CESC(N=302)	0.3306	4.17	TCGA-UC-A7PD-01
CESC(N=302)	0.2969	3.3235	TCGA-MY-A5BD-01
CESC(N=302)	0.3106	3.4791	TCGA-VS-A9UZ-01
CESC(N=302)	0.3151	3.3731	TCGA-DS-A1OD-01
CESC(N=302)	0.3462	4.1986	TCGA-C5-A8XH-01
CESC(N=302)	0.2927	3.5098	TCGA-EK-A2RC-01
CESC(N=302)	0.2921	2.6873	TCGA-JX-A3Q8-01
CESC(N=302)	0.3077	4.623	TCGA-JW-A5VL-01
CESC(N=302)	0.3368	2.5061	TCGA-DS-A7WI-01
CESC(N=302)	0.3464	3.4304	TCGA-VS-A953-01
CESC(N=302)	0.2845	3.4752	TCGA-EA-A44S-01
CESC(N=302)	0.3346	3.7688	TCGA-VS-A957-01
CESC(N=302)	0.294	3.5374	TCGA-JW-A5VH-01
CESC(N=302)	0.2824	3.7688	TCGA-EA-A3HR-01
CESC(N=302)	0.2928	3.1393	TCGA-EA-A3QE-01
CESC(N=302)	0.3433	3.6066	TCGA-WL-A834-01
CESC(N=302)	0.3561	2.9507	TCGA-C5-A901-01
CESC(N=302)	0.3368	3.0074	TCGA-JW-A69B-01
CESC(N=302)	0.2765	3.7603	TCGA-FU-A3HY-01
CESC(N=302)	0.2943	4.1219	TCGA-C5-A1M6-01
CESC(N=302)	0.3238	3.4635	TCGA-VS-A9V4-01
CESC(N=302)	0.3397	2.3019	TCGA-VS-A8Q8-01
CESC(N=302)	0.2834	2.9186	TCGA-DS-A0VN-01
CESC(N=302)	0.3113	3.8147	TCGA-MU-A8JM-01
CESC(N=302)	0.3009	3.7982	TCGA-C5-A2LY-01
CESC(N=302)	0.3104	3.8788	TCGA-FU-A23K-01
CESC(N=302)	0.3345	3.2781	TCGA-EA-A6QX-01
CESC(N=302)	0.3416	3.4264	TCGA-C5-A7CH-01
CESC(N=302)	0.3084	0.6425	TCGA-EK-A2RN-01
CESC(N=302)	0.3104	3.2781	TCGA-EK-A2RJ-01
CESC(N=302)	0.2903	2.4883	TCGA-C5-A1BM-01
CESC(N=302)	0.3366	4.7437	TCGA-Q1-A73R-01
CESC(N=302)	0.3269	4.6983	TCGA-DS-A7WH-01
CESC(N=302)	0.3559	3.8749	TCGA-ZJ-AAX4-01
CESC(N=302)	0.3476	4.162	TCGA-C5-A7CK-01
CESC(N=302)	0.346	3.5411	TCGA-VS-A8EK-01
CESC(N=302)	0.2805	3.1195	TCGA-EA-A1QS-01
CESC(N=302)	0.2922	4.5243	TCGA-FU-A3WB-01
CESC(N=302)	0.2898	3.2511	TCGA-FU-A3TQ-01
CESC(N=302)	0.3397	2.9966	TCGA-C5-A8XI-01
CESC(N=302)	0.3042	4.2274	TCGA-C5-A1BN-01
CESC(N=302)	0.293	3.2328	TCGA-IR-A3LA-01
CESC(N=302)	0.3591	4.0558	TCGA-VS-A94X-01
CESC(N=302)	0.4485	2.7868	TCGA-MA-AA42-01
CESC(N=302)	0.3527	3.0234	TCGA-C5-A8YQ-01
CESC(N=302)	0.3294	3.4739	TCGA-ZJ-AB0H-01
CESC(N=302)	0.3404	3.7646	TCGA-C5-A7X5-01
CESC(N=302)	0.3241	3.5547	TCGA-VS-A9U5-01
CESC(N=302)	0.2778	2.667	TCGA-C5-A1M7-01
CESC(N=302)	0.3611	3.7432	TCGA-C5-A905-01
CESC(N=302)	0.3147	3.4384	TCGA-Q1-A5R2-01
CESC(N=302)	0.2902	4.2312	TCGA-EK-A3GJ-01
CESC(N=302)	0.288	3.3745	TCGA-MU-A51Y-01
CESC(N=302)	0.2972	3.4674	TCGA-DG-A2KH-01
CESC(N=302)	0.3434	3.5124	TCGA-VS-A8EB-01
CESC(N=302)	0.2771	4.366	TCGA-LP-A4AX-01
CESC(N=302)	0.4907	4.1161	TCGA-VS-A94Z-01
CESC(N=302)	0.3555	4.0696	TCGA-ZJ-AAXB-01
CESC(N=302)	0.3048	2.0395	TCGA-C5-A1MQ-01
CESC(N=302)	0.2887	3.3206	TCGA-EX-A1H6-01
CESC(N=302)	0.315	2.9356	TCGA-ZJ-AAXF-01
CESC(N=302)	0.3413	3.1717	TCGA-VS-A9UM-01
CESC(N=302)	0.3418	3.0358	TCGA-VS-A8EH-01
CESC(N=302)	0.2814	2.6302	TCGA-BI-A0VR-01
CESC(N=302)	0.267	3.5911	TCGA-EA-A5FO-01
CESC(N=302)	0.2744	2.2237	TCGA-DR-A0ZM-01
CESC(N=302)	0.3279	3.1228	TCGA-MA-AA43-01
CESC(N=302)	0.3115	3.8391	TCGA-C5-A7UC-01
CESC(N=302)	0.3344	4.0304	TCGA-C5-A7XC-01
CESC(N=302)	0.3403	3.242	TCGA-VS-A8QH-01
CESC(N=302)	0.2845	3.3105	TCGA-LP-A5U3-01
CESC(N=302)	0.2917	3.2267	TCGA-EA-A3HT-01
CESC(N=302)	0.2742	4.1867	TCGA-IR-A3LC-01
CESC(N=302)	0.3294	3.5523	TCGA-FU-A770-01
CESC(N=302)	0.3385	4.4128	TCGA-VS-A8EC-01
CESC(N=302)	0.3319	3.3549	TCGA-4J-AA1J-01
CESC(N=302)	0.269	3.652	TCGA-LP-A4AV-01
CESC(N=302)	0.3072	3.8601	TCGA-EK-A2RL-01
CESC(N=302)	0.2877	3.1604	TCGA-EK-A3GM-01
CESC(N=302)	0.3176	3.958	TCGA-VS-A9UC-01
CESC(N=302)	0.3019	4.248	TCGA-FU-A2QG-01
CESC(N=302)	0.3135	2.828	TCGA-EK-A2PM-01
CESC(N=302)	0.2758	3.0859	TCGA-DS-A0VK-01
CESC(N=302)	0.358	3.7389	TCGA-VS-A94W-01
CESC(N=302)	0.2817	3.1939	TCGA-C5-A1MK-01
CESC(N=302)	0.3019	3.4726	TCGA-C5-A1MH-01
CESC(N=302)	0.3062	3.8187	TCGA-C5-A0TN-01
CESC(N=302)	0.3375	3.3177	TCGA-VS-A9UI-01
CESC(N=302)	0.2909	3.772	TCGA-FU-A3TX-01
CESC(N=302)	0.3326	3.8511	TCGA-Q1-A6DV-01
CESC(N=302)	0.296	3.5535	TCGA-C5-A1ML-01
CESC(N=302)	0.3606	2.7444	TCGA-VS-A8QM-01
CESC(N=302)	0.3265	2.2513	TCGA-RA-A741-01
CESC(N=302)	0.3156	2.5852	TCGA-VS-A954-01
CESC(N=302)	0.3309	2.6278	TCGA-XS-A8TJ-01
CESC(N=302)	0.2932	3.4156	TCGA-LP-A4AW-01
CESC(N=302)	0.3161	3.3148	TCGA-JW-A5VK-01
CESC(N=302)	0.2946	2.8301	TCGA-EK-A2H0-01
CESC(N=302)	0.2971	4.0313	TCGA-EX-A449-01
CESC(N=302)	0.3654	2.5731	TCGA-C5-A902-01
CESC(N=302)	0.3388	3.2796	TCGA-MA-AA3X-01
CESC(N=302)	0.3522	3.3661	TCGA-C5-A7CO-01
CESC(N=302)	0.3216	3.4437	TCGA-C5-A2LV-01
CESC(N=302)	0.3406	3.325	TCGA-VS-A9UT-01
CESC(N=302)	0.3246	2.9984	TCGA-ZJ-AAX8-01
CESC(N=302)	0.2788	3.4437	TCGA-C5-A1BJ-01
LUAD(N=511)	0.3067	2.9911	TCGA-44-6778-01
LUAD(N=511)	0.291	3.1079	TCGA-05-4420-01
LUAD(N=511)	0.3127	2.9674	TCGA-64-1679-01
LUAD(N=511)	0.2967	1.8404	TCGA-49-6744-01
LUAD(N=511)	0.2939	3.0859	TCGA-55-6982-01
LUAD(N=511)	0.3335	1.2333	TCGA-NJ-A4YI-01
LUAD(N=511)	0.2944	3.6894	TCGA-73-4666-01
LUAD(N=511)	0.3314	3.0585	TCGA-MN-A4N1-01
LUAD(N=511)	0.3558	3.1669	TCGA-55-7911-01
LUAD(N=511)	0.335	1.3109	TCGA-55-A4DG-01
LUAD(N=511)	0.3419	2.7205	TCGA-L9-A5IP-01
LUAD(N=511)	0.2984	3.1079	TCGA-73-4662-01
LUAD(N=511)	0.3013	1.8242	TCGA-55-6712-01
LUAD(N=511)	0.2731	2.3508	TCGA-97-7553-01
LUAD(N=511)	0.3338	3.8116	TCGA-49-AARE-01
LUAD(N=511)	0.3409	1.2147	TCGA-50-8460-01
LUAD(N=511)	0.2962	2.5585	TCGA-50-5933-01
LUAD(N=511)	0.2954	2.9655	TCGA-44-6774-01
LUAD(N=511)	0.2934	2.8838	TCGA-73-4670-01
LUAD(N=511)	0.3062	2.5313	TCGA-55-A48Z-01
LUAD(N=511)	0.3033	2.0218	TCGA-75-7031-01
LUAD(N=511)	0.3226	1.8918	TCGA-44-A47A-01
LUAD(N=511)	0.3117	3.0323	TCGA-05-4398-01
LUAD(N=511)	0.2811	0.8961	TCGA-67-3773-01
LUAD(N=511)	0.2985	2.3732	TCGA-64-5781-01
LUAD(N=511)	0.3059	1.7532	TCGA-97-7552-01
LUAD(N=511)	0.3164	2.1444	TCGA-49-AARN-01
LUAD(N=511)	0.2725	2.667	TCGA-44-3919-01
LUAD(N=511)	0.3283	2.1313	TCGA-99-8032-01
LUAD(N=511)	0.329	3.3759	TCGA-55-8299-01
LUAD(N=511)	0.3009	2.8838	TCGA-55-A491-01
LUAD(N=511)	0.3005	3.7204	TCGA-50-6595-01
LUAD(N=511)	0.3285	3.0533	TCGA-95-A4VP-01
LUAD(N=511)	0.3126	3.074	TCGA-55-8302-01
LUAD(N=511)	0.2866	0.690953	TCGA-44-4112-01
LUAD(N=511)	0.2825	2.4144	TCGA-05-4430-01
LUAD(N=511)	0.3008	3.9819	TCGA-75-7027-01
LUAD(N=511)	0.2747	2.4252	TCGA-44-2668-01
LUAD(N=511)	0.3629	3.074	TCGA-55-8507-01
LUAD(N=511)	0.3148	1.3735	TCGA-69-8254-01
LUAD(N=511)	0.323	3.2189	TCGA-78-8640-01
LUAD(N=511)	0.351	3.1876	TCGA-69-7979-01
LUAD(N=511)	0.3036	1.7954	TCGA-55-7573-01
LUAD(N=511)	0.2991	1.412	TCGA-49-4506-01
LUAD(N=511)	0.2803	2.4035	TCGA-05-4402-01
LUAD(N=511)	0.3525	2.6255	TCGA-44-8119-01
LUAD(N=511)	0.3507	2.3732	TCGA-55-7724-01
LUAD(N=511)	0.3029	2.0004	TCGA-44-6776-01
LUAD(N=511)	0.3006	1.7009	TCGA-49-4514-01
LUAD(N=511)	0.2819	2.874	TCGA-05-4396-01
LUAD(N=511)	0.3441	2.6602	TCGA-55-8204-01
LUAD(N=511)	0.3258	2.0569	TCGA-L4-A4E6-01
LUAD(N=511)	0.2866	2.9729	TCGA-75-6205-01
LUAD(N=511)	0.3242	3.5645	TCGA-62-A46O-01
LUAD(N=511)	0.3151	5.2891	TCGA-78-7155-01
LUAD(N=511)	0.3272	2.5437	TCGA-62-A472-01
LUAD(N=511)	0.3064	2.1606	TCGA-NJ-A55R-01
LUAD(N=511)	0.3261	2.8014	TCGA-62-8395-01
LUAD(N=511)	0.4503	3.0893	TCGA-95-7567-01
LUAD(N=511)	0.3028	2.1988	TCGA-50-5051-01
LUAD(N=511)	0.3259	2.2901	TCGA-55-A48Y-01
LUAD(N=511)	0.3277	1.334	TCGA-86-A456-01
LUAD(N=511)	0.3108	0.6145	TCGA-50-5068-01
LUAD(N=511)	0.3278	1.9111	TCGA-NJ-A55A-01
LUAD(N=511)	0.32	2.4701	TCGA-J2-A4AG-01
LUAD(N=511)	0.3071	2.1798	TCGA-05-4405-01
LUAD(N=511)	0.2843	2.3816	TCGA-50-5944-01
LUAD(N=511)	0.3329	3.1062	TCGA-86-7955-01
LUAD(N=511)	0.2908	2.004	TCGA-50-6673-01
LUAD(N=511)	0.3554	3.2885	TCGA-55-7727-01
LUAD(N=511)	0.3384	2.5876	TCGA-55-8510-01
LUAD(N=511)	0.3315	3.0978	TCGA-MP-A4T8-01
LUAD(N=511)	0.341	2.1574	TCGA-86-8279-01
LUAD(N=511)	0.3189	2.6208	TCGA-55-A494-01
LUAD(N=511)	0.3142	1.72944	TCGA-44-3917-01
LUAD(N=511)	0.3003	3.6486	TCGA-75-5125-01
LUAD(N=511)	0.3269	2.7139	TCGA-55-8615-01
LUAD(N=511)	0.3514	3.1844	TCGA-MP-A4TF-01
LUAD(N=511)	0.2926	2.5213	TCGA-55-6979-01
LUAD(N=511)	0.5047	2.6255	TCGA-86-A4JF-01
LUAD(N=511)	0.3447	2.5511	TCGA-86-7701-01
LUAD(N=511)	0.3196	3.3278	TCGA-62-8398-01
LUAD(N=511)	0.3265	1.7489	TCGA-L9-A443-01
LUAD(N=511)	0.3233	3.0961	TCGA-78-8660-01
LUAD(N=511)	0.3143	2.8582	TCGA-78-7148-01
LUAD(N=511)	0.2956	2.2268	TCGA-67-6215-01
LUAD(N=511)	0.3394	1.9527	TCGA-55-A490-01
LUAD(N=511)	0.3588	2.409	TCGA-69-7974-01
LUAD(N=511)	0.3241	2.9186	TCGA-49-AAR4-01
LUAD(N=511)	0.2744	1.736	TCGA-05-4418-01
LUAD(N=511)	0.2877	2.7742	TCGA-35-4123-01
LUAD(N=511)	0.2795	2.7051	TCGA-55-6969-01
LUAD(N=511)	0.3523	2.7314	TCGA-91-8497-01
LUAD(N=511)	0.3313	2.0742	TCGA-62-A470-01
LUAD(N=511)	0.3105	2.9966	TCGA-53-A4EZ-01
LUAD(N=511)	0.3088	1.8404	TCGA-78-7162-01
LUAD(N=511)	0.3295	2.0395	TCGA-62-A46Y-01
LUAD(N=511)	0.3214	2.5634	TCGA-62-A46R-01
LUAD(N=511)	0.2886	2.8442	TCGA-05-4244-01
LUAD(N=511)	0.3245	2.7314	TCGA-L9-A8F4-01
LUAD(N=511)	0.3484	2.8838	TCGA-55-7726-01
LUAD(N=511)	0.307	2.2753	TCGA-49-4512-01
LUAD(N=511)	0.35	3.5547	TCGA-73-A9RS-01
LUAD(N=511)	0.3054	2.118	TCGA-MP-A4TD-01
LUAD(N=511)	0.2962	2.6805	TCGA-75-5147-01
LUAD(N=511)	0.3047	2.1798	TCGA-44-7671-01
LUAD(N=511)	0.3091	3.2677	TCGA-38-4631-01
LUAD(N=511)	0.321	2.0742	TCGA-NJ-A55O-01
LUAD(N=511)	0.2992	2.7292	TCGA-75-6211-01
LUAD(N=511)	0.3106	1.7702	TCGA-05-5420-01
LUAD(N=511)	0.2912	3.9974	TCGA-55-1594-01
LUAD(N=511)	0.3093	3.992	TCGA-64-5774-01
LUAD(N=511)	0.292	2.8641	TCGA-50-5941-01
LUAD(N=511)	0.2713	2.43504	TCGA-44-2662-01
LUAD(N=511)	0.2987	1.4652	TCGA-97-A4M2-01
LUAD(N=511)	0.3538	3.4224	TCGA-55-7995-01
LUAD(N=511)	0.3486	2.4225	TCGA-95-7043-01
LUAD(N=511)	0.3221	2.3048	TCGA-NJ-A4YP-01
LUAD(N=511)	0.3065	0.9642	TCGA-97-A4M1-01
LUAD(N=511)	0.3146	1.5661	TCGA-78-7149-01
LUAD(N=511)	0.3095	3.2707	TCGA-MP-A4TC-01
LUAD(N=511)	0.2956	2.1411	TCGA-97-A4M5-01
LUAD(N=511)	0.3429	1.6374	TCGA-99-8028-01
LUAD(N=511)	0.2965	2.0218	TCGA-67-6217-01
LUAD(N=511)	0.3287	2.8936	TCGA-44-A47B-01
LUAD(N=511)	0.3118	2.0218	TCGA-38-4628-01
LUAD(N=511)	0.3059	3.66	TCGA-05-4250-01
LUAD(N=511)	0.2771	2.118	TCGA-67-3774-01
LUAD(N=511)	0.2893	2.727	TCGA-80-5608-01
LUAD(N=511)	0.2907	2.6647	TCGA-05-4389-01
LUAD(N=511)	0.2893	1.7617	TCGA-75-6203-01
LUAD(N=511)	0.275	3.2405	TCGA-55-6981-01
LUAD(N=511)	0.3455	2.6895	TCGA-55-7903-01
LUAD(N=511)	0.3238	2.9929	TCGA-62-8394-01
LUAD(N=511)	0.2967	2.2513	TCGA-49-4488-01
LUAD(N=511)	0.2959	1.3283	TCGA-78-7537-01
LUAD(N=511)	0.2913	2.7073	TCGA-80-5611-01
LUAD(N=511)	0.2864	1.9264	TCGA-55-6972-01
LUAD(N=511)	0.3385	3.9232	TCGA-86-A4D0-01
LUAD(N=511)	0.3364	1.7403	TCGA-97-7941-01
LUAD(N=511)	0.2902	2.1862	TCGA-91-6840-01
LUAD(N=511)	0.3431	2.296	TCGA-69-7978-01
LUAD(N=511)	0.2831	1.9931	TCGA-50-5930-01
LUAD(N=511)	0.3262	2.7161	TCGA-93-8067-01
LUAD(N=511)	0.3191	2.7444	TCGA-44-A479-01
LUAD(N=511)	0.3177	2.233	TCGA-55-8087-01
LUAD(N=511)	0.2982	2.8542	TCGA-86-6562-01
LUAD(N=511)	0.3179	2.1013	TCGA-05-4425-01
LUAD(N=511)	0.3122	2.2113	TCGA-MP-A4SW-01
LUAD(N=511)	0.318	1.9895	TCGA-55-8512-01
LUAD(N=511)	0.2832	1.4547	TCGA-67-3770-01
LUAD(N=511)	0.2877	3.7291	TCGA-50-6592-01
LUAD(N=511)	0.2973	3.1556	TCGA-55-6975-01
LUAD(N=511)	0.3278	1.0433	TCGA-S2-AA1A-01
LUAD(N=511)	0.3413	3.1588	TCGA-55-8511-01
LUAD(N=511)	0.2715	2.5061	TCGA-05-4434-01
LUAD(N=511)	0.319	2.5011	TCGA-55-8092-01
LUAD(N=511)	0.3098	1.5216	TCGA-L9-A50W-01
LUAD(N=511)	0.3087	3.5535	TCGA-44-7661-01
LUAD(N=511)	0.2836	2.2813	TCGA-05-4426-01
LUAD(N=511)	0.2876	3.2359	TCGA-05-4390-01
LUAD(N=511)	0.2793	1.3679	TCGA-64-5815-01
LUAD(N=511)	0.3157	2.0183	TCGA-69-7761-01
LUAD(N=511)	0.3329	1.9601	TCGA-55-8301-01
LUAD(N=511)	0.3233	1.4388	TCGA-44-A4SU-01
LUAD(N=511)	0.3239	2.4857	TCGA-69-7765-01
LUAD(N=511)	0.3053	2.7636	TCGA-05-4433-01
LUAD(N=511)	0.3292	1.736	TCGA-55-8508-01
LUAD(N=511)	0.313	2.8858	TCGA-50-5044-01
LUAD(N=511)	0.285	2.3898	TCGA-05-4384-01
LUAD(N=511)	0.322	2.6067	TCGA-O1-A52J-01
LUAD(N=511)	0.317	3.4984	TCGA-78-7220-01
LUAD(N=511)	0.2843	2.5536	TCGA-05-4422-01
LUAD(N=511)	0.2979	3.4765	TCGA-44-6779-01
LUAD(N=511)	0.3472	2.7183	TCGA-86-8672-01
LUAD(N=511)	0.3045	2.0218	TCGA-55-6983-01
LUAD(N=511)	0.3308	3.3952	TCGA-91-8499-01
LUAD(N=511)	0.3153	4.3492	TCGA-91-6836-01
LUAD(N=511)	0.3598	1.3623	TCGA-38-7271-01
LUAD(N=511)	0.3188	1.4962	TCGA-NJ-A4YG-01
LUAD(N=511)	0.3074	1.9264	TCGA-73-4658-01
LUAD(N=511)	0.3188	1.4911	TCGA-86-8076-01
LUAD(N=511)	0.3051	1.9377	TCGA-55-6987-01
LUAD(N=511)	0.3139	1.5013	TCGA-78-7152-01
LUAD(N=511)	0.3506	1.7229	TCGA-55-8096-01
LUAD(N=511)	0.2898	2.4386	TCGA-75-5122-01
LUAD(N=511)	0.3013	3.4318	TCGA-50-5931-01
LUAD(N=511)	0.3115	2.8858	TCGA-49-AARO-01
LUAD(N=511)	0.2747	2.2603	TCGA-44-2655-01
LUAD(N=511)	0.2789	2.4359	TCGA-73-4668-01
LUAD(N=511)	0.3197	3.8769	TCGA-91-6831-01
LUAD(N=511)	0.3278	2.081	TCGA-L9-A444-01
LUAD(N=511)	0.3001	2.6441	TCGA-05-5425-01
LUAD(N=511)	0.3101	2.51373	TCGA-44-6775-01
LUAD(N=511)	0.296	1.1577	TCGA-75-7025-01
LUAD(N=511)	0.3031	1.6695	TCGA-05-5429-01
LUAD(N=511)	0.2904	2.0878	TCGA-99-7458-01
LUAD(N=511)	0.3147	2.7379	TCGA-97-7546-01
LUAD(N=511)	0.2699	0.8568	TCGA-67-3772-01
LUAD(N=511)	0.2956	2.362	TCGA-05-4395-01
LUAD(N=511)	0.3602	1.7273	TCGA-91-7771-01
LUAD(N=511)	0.3082	1.6187	TCGA-55-6984-01
LUAD(N=511)	0.3106	1.71416	TCGA-44-3918-01
LUAD(N=511)	0.3327	1.7828	TCGA-50-8459-01
LUAD(N=511)	0.3681	3.4752	TCGA-69-7980-01
LUAD(N=511)	0.3341	2.8055	TCGA-50-5939-01
LUAD(N=511)	0.2958	2.7029	TCGA-75-5126-01
LUAD(N=511)	0.3083	3.6428	TCGA-50-6594-01
LUAD(N=511)	0.3234	2.9013	TCGA-MP-A5C7-01
LUAD(N=511)	0.3481	1.56281	TCGA-44-5645-01
LUAD(N=511)	0.3089	1.8564	TCGA-50-5935-01
LUAD(N=511)	0.3043	2.3337	TCGA-55-7914-01
LUAD(N=511)	0.3078	3.1409	TCGA-55-7576-01
LUAD(N=511)	0.3003	1.22713	TCGA-44-2666-01
LUAD(N=511)	0.3198	2.5707	TCGA-55-7284-01
LUAD(N=511)	0.3162	2.7073	TCGA-73-4676-01
LUAD(N=511)	0.3093	1.3225	TCGA-78-7166-01
LUAD(N=511)	0.3239	4.0688	TCGA-83-5908-01
LUAD(N=511)	0.3052	2.3337	TCGA-50-5049-01
LUAD(N=511)	0.3466	2.8096	TCGA-44-3396-01
LUAD(N=511)	0.3222	1.8201	TCGA-97-8172-01
LUAD(N=511)	0.3029	2.0878	TCGA-50-6597-01
LUAD(N=511)	0.3363	3.9022	TCGA-69-8255-01
LUAD(N=511)	0.3108	2.2391	TCGA-62-A46U-01
LUAD(N=511)	0.3459	3.2766	TCGA-97-8176-01
LUAD(N=511)	0.3391	4.9732	TCGA-86-8358-01
LUAD(N=511)	0.3033	4.2548	TCGA-05-4415-01
LUAD(N=511)	0.2873	1.683	TCGA-55-7281-01
LUAD(N=511)	0.2989	1.9073	TCGA-78-7161-01
LUAD(N=511)	0.2769	2.7095	TCGA-49-4507-01
LUAD(N=511)	0.3078	2.118	TCGA-55-8621-01
LUAD(N=511)	0.3069	2.7205	TCGA-55-6970-01
LUAD(N=511)	0.2953	2.7227	TCGA-75-6207-01
LUAD(N=511)	0.3331	4.149	TCGA-55-8205-01
LUAD(N=511)	0.3202	2.4279	TCGA-69-7763-01
LUAD(N=511)	0.3381	3.3717	TCGA-55-7913-01
LUAD(N=511)	0.3149	0.688	TCGA-62-8397-01
LUAD(N=511)	0.2919	3.0706	TCGA-73-4659-01
LUAD(N=511)	0.3357	2.7205	TCGA-91-A4BC-01
LUAD(N=511)	0.3431	2.5188	TCGA-97-8547-01
LUAD(N=511)	0.3039	2.6647	TCGA-97-8175-01
LUAD(N=511)	0.2979	2.5972	TCGA-86-8075-01
LUAD(N=511)	0.3005	2.5363	TCGA-55-6985-01
LUAD(N=511)	0.3152	2.5288	TCGA-55-A48X-01
LUAD(N=511)	0.2817	1.0779	TCGA-44-2657-01
LUAD(N=511)	0.3409	2.9413	TCGA-95-7562-01
LUAD(N=511)	0.3117	0.8647	TCGA-55-7725-01
LUAD(N=511)	0.3272	2.5972	TCGA-69-A59K-01
LUAD(N=511)	0.3207	2.1734	TCGA-05-5715-01
LUAD(N=511)	0.3293	1.9302	TCGA-55-A492-01
LUAD(N=511)	0.296	3.4907	TCGA-78-7145-01
LUAD(N=511)	0.3248	2.4117	TCGA-86-8278-01
LUAD(N=511)	0.3204	3.3814	TCGA-MN-A4N5-01
LUAD(N=511)	0.3135	2.0465	TCGA-64-5778-01
LUAD(N=511)	0.313	2.7183	TCGA-J2-8194-01
LUAD(N=511)	0.3221	2.4359	TCGA-55-A57B-01
LUAD(N=511)	0.2806	2.0912	TCGA-38-4627-01
LUAD(N=511)	0.3021	3.9213	TCGA-86-7711-01
LUAD(N=511)	0.3204	1.0642	TCGA-05-5423-01
LUAD(N=511)	0.3433	0.6425	TCGA-91-8496-01
LUAD(N=511)	0.3218	2.1957	TCGA-86-8280-01
LUAD(N=511)	0.3286	1.51649	TCGA-44-6146-01
LUAD(N=511)	0.2965	4.2419	TCGA-78-7146-01
LUAD(N=511)	0.2776	2.4857	TCGA-35-4122-01
LUAD(N=511)	0.3313	2.1766	TCGA-78-8648-01
LUAD(N=511)	0.3435	3.637	TCGA-86-7953-01
LUAD(N=511)	0.321	3.5287	TCGA-44-5643-01
LUAD(N=511)	0.3439	2.3308	TCGA-73-7498-01
LUAD(N=511)	0.2991	3.2174	TCGA-75-6214-01
LUAD(N=511)	0.3085	1.787	TCGA-93-7348-01
LUAD(N=511)	0.3258	1.9822	TCGA-97-8174-01
LUAD(N=511)	0.3391	3.4304	TCGA-55-8620-01
LUAD(N=511)	0.3201	4.5392	TCGA-62-8399-01
LUAD(N=511)	0.3103	2.6185	TCGA-80-5607-01
LUAD(N=511)	0.3355	2.081	TCGA-49-AAR2-01
LUAD(N=511)	0.3	1.884	TCGA-55-6543-01
LUAD(N=511)	0.2866	1.3109	TCGA-49-4501-01
LUAD(N=511)	0.2956	1.4494	TCGA-78-7156-01
LUAD(N=511)	0.3163	2.2082	TCGA-62-A46S-01
LUAD(N=511)	0.3256	2.7357	TCGA-49-AARQ-01
LUAD(N=511)	0.3078	3.2707	TCGA-93-A4JN-01
LUAD(N=511)	0.3373	3.5994	TCGA-91-6847-01
LUAD(N=511)	0.3046	2.5036	TCGA-55-6642-01
LUAD(N=511)	0.3099	2.4779	TCGA-55-8203-01
LUAD(N=511)	0.3216	3.9185	TCGA-44-7670-01
LUAD(N=511)	0.3186	2.1541	TCGA-MP-A4TJ-01
LUAD(N=511)	0.2925	1.5316	TCGA-38-6178-01
LUAD(N=511)	0.3273	2.6783	TCGA-86-8074-01
LUAD(N=511)	0.3503	2.2019	TCGA-55-8616-01
LUAD(N=511)	0.33	1.2271	TCGA-97-A4M0-01
LUAD(N=511)	0.3133	2.8936	TCGA-49-6767-01
LUAD(N=511)	0.2662	2.9544	TCGA-55-1595-01
LUAD(N=511)	0.3245	1.8801	TCGA-49-AARR-01
LUAD(N=511)	0.307	3.074	TCGA-MP-A4T9-01
LUAD(N=511)	0.3404	0.848796	TCGA-44-6147-01
LUAD(N=511)	0.3277	2.7073	TCGA-86-8073-01
LUAD(N=511)	0.3073	1.9377	TCGA-MN-A4N4-01
LUAD(N=511)	0.306	1.9377	TCGA-97-A4M3-01
LUAD(N=511)	0.3042	1.8762	TCGA-86-7714-01
LUAD(N=511)	0.295	3.2811	TCGA-49-4487-01
LUAD(N=511)	0.324	3.3421	TCGA-78-7542-01
LUAD(N=511)	0.3282	2.8301	TCGA-95-A4VK-01
LUAD(N=511)	0.3527	3.3633	TCGA-55-7994-01
LUAD(N=511)	0.3036	3.242	TCGA-49-6742-01
LUAD(N=511)	0.3441	2.2543	TCGA-MP-A4T6-01
LUAD(N=511)	0.5316	2.4439	TCGA-55-8506-01
LUAD(N=511)	0.3176	3.5022	TCGA-MP-A4TA-01
LUAD(N=511)	0.3272	1.7912	TCGA-55-8091-01
LUAD(N=511)	0.299	2.7139	TCGA-91-6828-01
LUAD(N=511)	0.3281	1.2023	TCGA-35-5375-01
LUAD(N=511)	0.313	1.787	TCGA-97-A4M7-01
LUAD(N=511)	0.3056	2.2723	TCGA-78-7539-01
LUAD(N=511)	0.3327	1.9638	TCGA-J2-8192-01
LUAD(N=511)	0.3155	3.6195	TCGA-86-7713-01
LUAD(N=511)	0.2921	2.1574	TCGA-67-6216-01
LUAD(N=511)	0.3181	2.2842	TCGA-44-A47G-01
LUAD(N=511)	0.2941	2.236	TCGA-55-7816-01
LUAD(N=511)	0.3081	2.6278	TCGA-78-7147-01
LUAD(N=511)	0.281	1.5465	TCGA-44-3398-01
LUAD(N=511)	0.3017	2.5996	TCGA-78-7633-01
LUAD(N=511)	0.3062	1.8722	TCGA-86-A4P8-01
LUAD(N=511)	0.3105	2.328	TCGA-78-7535-01
LUAD(N=511)	0.3378	2.2051	TCGA-86-8671-01
LUAD(N=511)	0.2993	2.9243	TCGA-91-6835-01
LUAD(N=511)	0.2804	1.6187	TCGA-35-3615-01
LUAD(N=511)	0.2955	1.0293	TCGA-55-6980-01
LUAD(N=511)	0.3083	3.4752	TCGA-50-5936-01
LUAD(N=511)	0.2958	1.8119	TCGA-73-4675-01
LUAD(N=511)	0.3033	3.0995	TCGA-50-5932-01
LUAD(N=511)	0.3048	2.2019	TCGA-93-A4JO-01
LUAD(N=511)	0.3164	2.2543	TCGA-49-AAR3-01
LUAD(N=511)	0.3163	3.1637	TCGA-78-7154-01
LUAD(N=511)	0.3415	2.9394	TCGA-55-7910-01
LUAD(N=511)	0.3475	2.1734	TCGA-4B-A93V-01
LUAD(N=511)	0.3012	0.8805	TCGA-91-6849-01
LUAD(N=511)	0.3095	2.1957	TCGA-MP-A4SY-01
LUAD(N=511)	0.3118	3.0358	TCGA-MP-A4SV-01
LUAD(N=511)	0.3194	1.7786	TCGA-55-8513-01
LUAD(N=511)	0.3216	2.8602	TCGA-MP-A4T4-01
LUAD(N=511)	0.311	3.2557	TCGA-71-8520-01
LUAD(N=511)	0.3068	2.4035	TCGA-44-7672-01
LUAD(N=511)	0.2839	2.7931	TCGA-50-6593-01
LUAD(N=511)	0.3631	3.8431	TCGA-69-7973-01
LUAD(N=511)	0.3208	3.1129	TCGA-67-3771-01
LUAD(N=511)	0.3357	3.1278	TCGA-99-8033-01
LUAD(N=511)	0.2978	4.4706	TCGA-91-6848-01
LUAD(N=511)	0.2995	2.8661	TCGA-93-A4JP-01
LUAD(N=511)	0.3275	1.2815	TCGA-38-A44F-01
LUAD(N=511)	0.3098	2.9747	TCGA-44-7660-01
LUAD(N=511)	0.3473	2.3592	TCGA-69-7760-01
LUAD(N=511)	0.3472	2.7508	TCGA-69-7764-01
LUAD(N=511)	0.3006	0.769215	TCGA-44-2665-01
LUAD(N=511)	0.3302	3.4331	TCGA-55-8505-01
LUAD(N=511)	0.3321	3.3192	TCGA-95-7944-01
LUAD(N=511)	0.3574	3.4156	TCGA-L9-A7SV-01
LUAD(N=511)	0.3445	3.3675	TCGA-55-8089-01
LUAD(N=511)	0.3037	2.7784	TCGA-55-7283-01
LUAD(N=511)	0.3512	2.3366	TCGA-44-8117-01
LUAD(N=511)	0.3176	2.4831	TCGA-53-7626-01
LUAD(N=511)	0.3382	2.5487	TCGA-86-8673-01
LUAD(N=511)	0.3051	3.1145	TCGA-95-8494-01
LUAD(N=511)	0.3261	1.2023	TCGA-97-8171-01
LUAD(N=511)	0.3035	2.2421	TCGA-50-7109-01
LUAD(N=511)	0.3023	2.7993	TCGA-44-6145-01
LUAD(N=511)	0.3109	2.3953	TCGA-55-8085-01
LUAD(N=511)	0.3395	2.1541	TCGA-NJ-A4YF-01
LUAD(N=511)	0.3235	1.46	TCGA-NJ-A7XG-01
LUAD(N=511)	0.2921	1.4494	TCGA-05-4403-01
LUAD(N=511)	0.3278	1.9601	TCGA-55-8097-01
LUAD(N=511)	0.32	2.5462	TCGA-NJ-A4YQ-01
LUAD(N=511)	0.3077	2.0535	TCGA-97-7547-01
LUAD(N=511)	0.3053	3.551	TCGA-55-5899-01
LUAD(N=511)	0.2886	4.5224	TCGA-05-4397-01
LUAD(N=511)	0.3033	1.9034	TCGA-44-6777-01
LUAD(N=511)	0.337	2.7227	TCGA-55-7815-01
LUAD(N=511)	0.3068	2.2633	TCGA-91-6830-01
LUAD(N=511)	0.3039	2.8974	TCGA-44-A4SS-01
LUAD(N=511)	0.3019	1.0779	TCGA-44-7659-01
LUAD(N=511)	0.3387	1.7229	TCGA-53-7813-01
LUAD(N=511)	0.3193	2.6487	TCGA-05-4382-01
LUAD(N=511)	0.3075	2.4225	TCGA-93-A4JQ-01
LUAD(N=511)	0.298	2.4492	TCGA-05-5428-01
[truncated: 9,192 more rows]

## Sheet: TMB
Table S4. The correlation of CENPO expression with TMB in multiple types of cancers.
cancer types	TMB	Expression	SampleName
GBM(N=149)	10.74	3.9261	TCGA-19-1787-01
GBM(N=149)	0.96	3.0056	TCGA-06-5412-01
GBM(N=149)	0.58	3.5923	TCGA-12-5299-01
GBM(N=149)	0.94	3.7529	TCGA-06-2565-01
GBM(N=149)	0.6	3.3192	TCGA-06-2561-01
GBM(N=149)	0.32	2.2082	TCGA-06-0132-01
GBM(N=149)	1.44	3.9232	TCGA-19-2629-01
GBM(N=149)	0.72	2.9356	TCGA-06-0238-01
GBM(N=149)	0.8	2.651	TCGA-06-0749-01
GBM(N=149)	1.18	4.5547	TCGA-06-0174-01
GBM(N=149)	0.38	2.2482	TCGA-06-5410-01
GBM(N=149)	1.5	3.1195	TCGA-28-2513-01
GBM(N=149)	0.98	3.4224	TCGA-76-4929-01
GBM(N=149)	0.86	2.876	TCGA-06-0645-01
GBM(N=149)	0.78	4.6236	TCGA-32-2634-01
GBM(N=149)	0.26	2.7508	TCGA-06-0141-01
GBM(N=149)	1.1	4.1571	TCGA-06-0125-01
GBM(N=149)	0.56	1.8484	TCGA-26-1442-01
GBM(N=149)	0.76	3.0706	TCGA-26-5136-01
GBM(N=149)	1.38	3.6089	TCGA-14-1034-01
GBM(N=149)	0.96	2.7336	TCGA-06-0184-01
GBM(N=149)	1	3.3206	TCGA-12-3652-01
GBM(N=149)	0.84	3.9956	TCGA-76-4927-01
GBM(N=149)	1.04	3.6393	TCGA-14-0790-01
GBM(N=149)	0.78	3.5047	TCGA-26-5132-01
GBM(N=149)	0.94	4.0748	TCGA-76-4932-01
GBM(N=149)	1.2	4.17	TCGA-32-1970-01
GBM(N=149)	0.72	3.0757	TCGA-06-0219-01
GBM(N=149)	0.62	3.9774	TCGA-14-0787-01
GBM(N=149)	0.76	4.1136	TCGA-12-0618-01
GBM(N=149)	0.64	3.9031	TCGA-27-2524-01
GBM(N=149)	0.22	3.9783	TCGA-08-0386-01
GBM(N=149)	1	3.7443	TCGA-06-0190-01
GBM(N=149)	0.88	3.7432	TCGA-06-0745-01
GBM(N=149)	0.92	3.83	TCGA-26-5135-01
GBM(N=149)	0.54	3.3235	TCGA-41-3915-01
GBM(N=149)	0.94	2.8916	TCGA-27-1831-01
GBM(N=149)	0.78	4.5559	TCGA-28-1753-01
GBM(N=149)	1.24	4.748	TCGA-12-5295-01
GBM(N=149)	0.7	4.4027	TCGA-28-5204-01
GBM(N=149)	0.58	4.5946	TCGA-06-2569-01
GBM(N=149)	0.74	3.4304	TCGA-27-1830-01
GBM(N=149)	0.92	4.7377	TCGA-06-2559-01
GBM(N=149)	0.1	1.5806	TCGA-06-0139-01
GBM(N=149)	0.86	2.6624	TCGA-27-2526-01
GBM(N=149)	0.96	3.8085	TCGA-06-5856-01
GBM(N=149)	0.68	3.4264	TCGA-06-5418-01
GBM(N=149)	0.54	3.8054	TCGA-06-5414-01
GBM(N=149)	0.94	3.8501	TCGA-06-5417-01
GBM(N=149)	0.88	1.9452	TCGA-26-5134-01
GBM(N=149)	1.1	4.5644	TCGA-76-4925-01
GBM(N=149)	0.48	3.66	TCGA-28-2510-01
GBM(N=149)	0.8	4.1044	TCGA-06-5413-01
GBM(N=149)	0.58	4.1368	TCGA-06-0646-01
GBM(N=149)	0.84	4.701	TCGA-12-3650-01
GBM(N=149)	0.64	3.9213	TCGA-12-0616-01
GBM(N=149)	0.46	4.6236	TCGA-28-5215-01
GBM(N=149)	1.14	2.8799	TCGA-19-2620-01
GBM(N=149)	1.14	3.6312	TCGA-16-0846-01
GBM(N=149)	1.16	3.6054	TCGA-02-0047-01
GBM(N=149)	0.7	4.7033	TCGA-19-2624-01
GBM(N=149)	1.16	3.0217	TCGA-32-1982-01
GBM(N=149)	1.16	3.6289	TCGA-27-1835-01
GBM(N=149)	1.26	3.1393	TCGA-06-0747-01
GBM(N=149)	0.58	3.2297	TCGA-28-5220-01
GBM(N=149)	1.2	3.1701	TCGA-14-0817-01
GBM(N=149)	0.56	3.7709	TCGA-06-2570-01
GBM(N=149)	0.52	3.8033	TCGA-41-4097-01
GBM(N=149)	0.94	4.34242	TCGA-06-0211-01
GBM(N=149)	0.76	4.3133	TCGA-02-2483-01
GBM(N=149)	0.72	4.7154	TCGA-76-4931-01
GBM(N=149)	0.78	4.215	TCGA-27-2523-01
GBM(N=149)	0.68	3.9204	TCGA-27-1837-01
GBM(N=149)	1.18	3.0927	TCGA-06-0744-01
GBM(N=149)	0.68	2.7679	TCGA-06-0750-01
GBM(N=149)	1.04	3.3717	TCGA-32-5222-01
GBM(N=149)	0.74	3.3364	TCGA-27-2519-01
GBM(N=149)	1.18	3.8085	TCGA-12-0821-01
GBM(N=149)	0.84	4.2795	TCGA-19-2619-01
GBM(N=149)	0.94	3.6497	TCGA-12-0619-01
GBM(N=149)	0.84	2.6325	TCGA-28-5213-01
GBM(N=149)	1.08	2.7721	TCGA-14-0789-01
GBM(N=149)	1.5	4.3111	TCGA-28-5209-01
GBM(N=149)	0.32	4.0567	TCGA-28-5218-01
GBM(N=149)	0.88	4.0064	TCGA-28-2514-01
GBM(N=149)	0.78	4.5142	TCGA-06-5859-01
GBM(N=149)	0.88	3.7204	TCGA-28-2509-01
GBM(N=149)	0.92	4.7198	TCGA-14-1825-01
GBM(N=149)	0.82	3.3842	TCGA-19-4065-01
GBM(N=149)	1	3.6172	TCGA-02-2485-01
GBM(N=149)	1.04	3.6254	TCGA-12-1597-01
GBM(N=149)	0.84	4.0375	TCGA-28-1747-01
GBM(N=149)	0.52	2.5313	TCGA-28-2499-01
GBM(N=149)	1.48	2.9618	TCGA-06-0649-01
GBM(N=149)	1	4.2312	TCGA-06-2564-01
GBM(N=149)	0.72	4.0584	TCGA-06-5408-01
GBM(N=149)	0.6	3.1162	TCGA-27-1832-01
GBM(N=149)	0.72	2.694	TCGA-14-1829-01
GBM(N=149)	0.54	3.0234	TCGA-32-2615-01
GBM(N=149)	0.84	4.0001	TCGA-06-0158-01
GBM(N=149)	1.28	3.9506	TCGA-06-2558-01
GBM(N=149)	0.72	3.6405	TCGA-28-5216-01
GBM(N=149)	0.78	3.4517	TCGA-28-5207-01
GBM(N=149)	0.8	3.2929	TCGA-41-2572-01
GBM(N=149)	0.54	3.0757	TCGA-06-0130-01
GBM(N=149)	204.9	3.9232	TCGA-06-5416-01
GBM(N=149)	0.66	3.863	TCGA-06-0168-01
GBM(N=149)	0.92	2.2421	TCGA-02-0055-01
GBM(N=149)	0.86	3.9022	TCGA-06-5415-01
GBM(N=149)	0.48	3.5362	TCGA-06-5411-01
GBM(N=149)	0.74	3.5461	TCGA-26-5139-01
GBM(N=149)	1.32	3.0038	TCGA-76-4928-01
GBM(N=149)	0.9	3.9496	TCGA-06-0644-01
GBM(N=149)	0.94	4.178	TCGA-14-0871-01
GBM(N=149)	1.54	3.2557	TCGA-32-2632-01
GBM(N=149)	0.58	3.2885	TCGA-06-0882-01
GBM(N=149)	0.98	2.8838	TCGA-19-2625-01
GBM(N=149)	0.24	3.1344	TCGA-32-1980-01
GBM(N=149)	0.8	4.1011	TCGA-27-1834-01
GBM(N=149)	0.76	3.0842	TCGA-41-2571-01
GBM(N=149)	0.52	2.5363	TCGA-14-0781-01
GBM(N=149)	0.86	4.2266	TCGA-06-0157-01
GBM(N=149)	0.52	4.4108	TCGA-12-3653-01
GBM(N=149)	1.02	4.0807	TCGA-76-4926-01
GBM(N=149)	0.58	4.2781	TCGA-26-5133-01
GBM(N=149)	1.08	3.1442	TCGA-06-2562-01
GBM(N=149)	0.98	3.1908	TCGA-27-2521-01
GBM(N=149)	1.38	4.382	TCGA-41-5651-01
GBM(N=149)	1.02	2.376	TCGA-06-0210-01
GBM(N=149)	0.74	4.613	TCGA-19-5960-01
GBM(N=149)	1.02	4.1772	TCGA-06-0686-01
GBM(N=149)	1.18	3.7982	TCGA-06-2563-01
GBM(N=149)	0.76	2.183	TCGA-32-4213-01
GBM(N=149)	1.2	3.928	TCGA-15-0742-01
GBM(N=149)	0.8	3.5237	TCGA-06-0187-01
GBM(N=149)	1.7	5.1879	TCGA-19-1390-01
GBM(N=149)	0.68	3.6184	TCGA-06-2557-01
GBM(N=149)	0.64	3.5035	TCGA-06-0878-01
GBM(N=149)	0.66	4.5293	TCGA-06-0129-01
GBM(N=149)	1.2	2.9857	TCGA-16-1045-01
GBM(N=149)	0.86	4.546	TCGA-06-2567-01
GBM(N=149)	18.58	3.5863	TCGA-32-2616-01
GBM(N=149)	1.02	3.958	TCGA-28-5208-01
GBM(N=149)	1.2	4.0091	TCGA-06-1804-01
GBM(N=149)	1.18	3.0038	TCGA-14-2554-01
GBM(N=149)	1	4.2706	TCGA-27-2528-01
GBM(N=149)	3.04	4.3053	TCGA-06-5858-01
GBM(N=149)	1.08	2.05	TCGA-14-1823-01
GBM(N=149)	1.54	2.7763	TCGA-06-0743-01
GBMLGG(N=650)	10.74	3.9261	TCGA-19-1787-01
GBMLGG(N=650)	0.18	2.8819	TCGA-S9-A7J2-01
GBMLGG(N=650)	0.8	5.1065	TCGA-E1-A7YI-01
GBMLGG(N=650)	0.96	3.0056	TCGA-06-5412-01
GBMLGG(N=650)	0.7	3.3717	TCGA-DU-7302-01
GBMLGG(N=650)	0.58	3.5923	TCGA-12-5299-01
GBMLGG(N=650)	0.4	2.043	TCGA-P5-A5EX-01
GBMLGG(N=650)	0.42	3.2826	TCGA-HT-8563-01
GBMLGG(N=650)	0.4	3.0074	TCGA-FG-A60K-01
GBMLGG(N=650)	0.94	3.7529	TCGA-06-2565-01
GBMLGG(N=650)	0.6	3.3192	TCGA-06-2561-01
GBMLGG(N=650)	0.6	3.7291	TCGA-CS-5397-01
GBMLGG(N=650)	0.4	3.5337	TCGA-E1-5322-01
GBMLGG(N=650)	0.08	2.233	TCGA-HT-8558-01
GBMLGG(N=650)	0.44	2.3816	TCGA-S9-A6U8-01
GBMLGG(N=650)	0.38	2.2051	TCGA-HT-7854-01
GBMLGG(N=650)	0.52	2.7073	TCGA-HT-7467-01
GBMLGG(N=650)	0.48	2.7826	TCGA-HT-7874-01
GBMLGG(N=650)	0.66	2.9469	TCGA-S9-A6TV-01
GBMLGG(N=650)	0.36	4.0348	TCGA-VM-A8CD-01
GBMLGG(N=650)	0.32	2.2082	TCGA-06-0132-01
GBMLGG(N=650)	0.74	2.8034	TCGA-HT-7616-01
GBMLGG(N=650)	0.7	4.6294	TCGA-KT-A7W1-01
GBMLGG(N=650)	0.54	2.9167	TCGA-P5-A5F2-01
GBMLGG(N=650)	1.44	3.9232	TCGA-19-2629-01
GBMLGG(N=650)	0.48	3.2174	TCGA-HT-7607-01
GBMLGG(N=650)	0.72	2.9356	TCGA-06-0238-01
GBMLGG(N=650)	0.46	3.3379	TCGA-HT-7873-01
GBMLGG(N=650)	0.8	2.651	TCGA-06-0749-01
GBMLGG(N=650)	0.42	1.7316	TCGA-HT-7603-01
GBMLGG(N=650)	0.5	3.1604	TCGA-DB-A64P-01
GBMLGG(N=650)	1.18	4.5547	TCGA-06-0174-01
GBMLGG(N=650)	0.16	2.9148	TCGA-HW-7486-01
GBMLGG(N=650)	0.32	2.3816	TCGA-P5-A5F1-01
GBMLGG(N=650)	0.34	1.6649	TCGA-DU-7011-01
GBMLGG(N=650)	0.54	2.8602	TCGA-P5-A77X-01
GBMLGG(N=650)	0.46	1.9786	TCGA-VM-A8CA-01
GBMLGG(N=650)	0.64	2.5036	TCGA-DU-7015-01
GBMLGG(N=650)	0.5	2.7951	TCGA-TM-A7C5-01
GBMLGG(N=650)	0.4	3.002	TCGA-DU-8162-01
GBMLGG(N=650)	0.5	2.6464	TCGA-TM-A84O-01
GBMLGG(N=650)	0.38	2.2482	TCGA-06-5410-01
GBMLGG(N=650)	0.54	2.5112	TCGA-S9-A7R3-01
GBMLGG(N=650)	0.44	3.034	TCGA-TQ-A7RN-01
GBMLGG(N=650)	1.5	3.1195	TCGA-28-2513-01
GBMLGG(N=650)	0.22	2.676	TCGA-DU-A6S6-01
GBMLGG(N=650)	0.48	2.4883	TCGA-P5-A735-01
GBMLGG(N=650)	0.08	2.5238	TCGA-HT-7691-01
GBMLGG(N=650)	0.32	2.3816	TCGA-FG-A6J1-01
GBMLGG(N=650)	0.42	2.496	TCGA-S9-A7R7-01
GBMLGG(N=650)	0.98	3.4224	TCGA-76-4929-01
GBMLGG(N=650)	0.74	3.4752	TCGA-DU-6402-01
GBMLGG(N=650)	0.6	0.6969	TCGA-HT-7684-01
GBMLGG(N=650)	1	4.1384	TCGA-HT-8104-01
GBMLGG(N=650)	0.36	2.8014	TCGA-FN-7833-01
GBMLGG(N=650)	0.34	2.376	TCGA-HT-7473-01
GBMLGG(N=650)	0.86	2.876	TCGA-06-0645-01
GBMLGG(N=650)	0.46	3.7028	TCGA-TQ-A7RU-01
GBMLGG(N=650)	0.52	2.6783	TCGA-DB-A4XF-01
GBMLGG(N=650)	0.42	2.4465	TCGA-FG-A713-01
GBMLGG(N=650)	0.86	3.6916	TCGA-E1-A7YL-01
GBMLGG(N=650)	0.52	3.4007	TCGA-CS-5396-01
GBMLGG(N=650)	0.48	3.9232	TCGA-HW-8322-01
GBMLGG(N=650)	0.34	2.1345	TCGA-S9-A6U9-01
GBMLGG(N=650)	0.24	2.824	TCGA-HT-7676-01
GBMLGG(N=650)	0.58	3.6816	TCGA-HT-7469-01
GBMLGG(N=650)	0.78	4.6236	TCGA-32-2634-01
GBMLGG(N=650)	0.52	2.5683	TCGA-HT-7478-01
GBMLGG(N=650)	0.76	2.0147	TCGA-DU-A5TW-01
GBMLGG(N=650)	0.6	2.6185	TCGA-S9-A6TX-01
GBMLGG(N=650)	0.86	3.6703	TCGA-RY-A83Z-01
GBMLGG(N=650)	0.26	2.7508	TCGA-06-0141-01
GBMLGG(N=650)	1.1	4.1571	TCGA-06-0125-01
GBMLGG(N=650)	0.88	2.9262	TCGA-FG-A6IZ-01
GBMLGG(N=650)	0.88	3.3521	TCGA-CS-4941-01
GBMLGG(N=650)	0.32	1.8801	TCGA-DH-A7UT-01
GBMLGG(N=650)	0.48	1.692	TCGA-DU-5871-01
GBMLGG(N=650)	0.54	2.128	TCGA-HW-8321-01
GBMLGG(N=650)	0.42	3.7356	TCGA-EZ-7264-01
GBMLGG(N=650)	0.66	2.6348	TCGA-CS-6666-01
GBMLGG(N=650)	0.26	3.7269	TCGA-HW-7491-01
GBMLGG(N=650)	0.3	3.3435	TCGA-S9-A6U1-01
GBMLGG(N=650)	1.04	2.8117	TCGA-E1-5307-01
GBMLGG(N=650)	0.64	3.7898	TCGA-DU-A76L-01
GBMLGG(N=650)	0.3	2.8076	TCGA-HW-7495-01
GBMLGG(N=650)	0	2.4252	TCGA-CS-6669-01
GBMLGG(N=650)	0.54	3.5299	TCGA-HT-7481-01
GBMLGG(N=650)	0.26	3.1637	TCGA-DU-8163-01
GBMLGG(N=650)	0.56	1.8484	TCGA-26-1442-01
GBMLGG(N=650)	7.14	3.8788	TCGA-HT-8110-01
GBMLGG(N=650)	0.24	3.3675	TCGA-RY-A840-01
GBMLGG(N=650)	0.1	2.5462	TCGA-VM-A8C9-01
GBMLGG(N=650)	0.5	3.3407	TCGA-HW-8319-01
GBMLGG(N=650)	0.74	2.8219	TCGA-QH-A6CW-01
GBMLGG(N=650)	0.22	3.3163	TCGA-DU-5870-01
GBMLGG(N=650)	0.28	3.2267	TCGA-TM-A84S-01
GBMLGG(N=650)	0.76	3.0706	TCGA-26-5136-01
GBMLGG(N=650)	1.38	3.6089	TCGA-14-1034-01
GBMLGG(N=650)	0.96	2.7336	TCGA-06-0184-01
GBMLGG(N=650)	1	3.3206	TCGA-12-3652-01
GBMLGG(N=650)	0.48	3.0376	TCGA-RY-A845-01
GBMLGG(N=650)	0.84	3.9956	TCGA-76-4927-01
GBMLGG(N=650)	0.48	3.0199	TCGA-FG-8182-01
GBMLGG(N=650)	1.04	3.6393	TCGA-14-0790-01
GBMLGG(N=650)	0.78	3.5047	TCGA-26-5132-01
GBMLGG(N=650)	1.06	3.1062	TCGA-FG-6688-01
GBMLGG(N=650)	0.8	3.3278	TCGA-TQ-A7RP-01
GBMLGG(N=650)	0.36	2.3953	TCGA-HT-8113-01
GBMLGG(N=650)	0.94	4.0748	TCGA-76-4932-01
GBMLGG(N=650)	0.74	2.8381	TCGA-HT-7689-01
GBMLGG(N=650)	0.28	2.6895	TCGA-FG-7638-01
GBMLGG(N=650)	0.64	4.3385	TCGA-DU-7013-01
GBMLGG(N=650)	1.2	4.17	TCGA-32-1970-01
GBMLGG(N=650)	0.28	2.828	TCGA-E1-A7Z3-01
GBMLGG(N=650)	0.4	2.6371	TCGA-HT-7476-01
GBMLGG(N=650)	0.48	3.3661	TCGA-TQ-A7RG-01
GBMLGG(N=650)	2.04	3.2677	TCGA-DU-A7T6-01
GBMLGG(N=650)	0.38	3.5682	TCGA-DB-A4XC-01
GBMLGG(N=650)	1.1	3.3619	TCGA-FG-A4MW-01
GBMLGG(N=650)	0.72	3.0757	TCGA-06-0219-01
GBMLGG(N=650)	0.54	3.3321	TCGA-DH-5142-01
GBMLGG(N=650)	0.62	3.9774	TCGA-14-0787-01
GBMLGG(N=650)	0.44	3.1294	TCGA-S9-A6U2-01
GBMLGG(N=650)	0.76	4.1136	TCGA-12-0618-01
GBMLGG(N=650)	0.64	3.9031	TCGA-27-2524-01
GBMLGG(N=650)	0.68	2.824	TCGA-TQ-A7RH-01
GBMLGG(N=650)	0.22	3.9783	TCGA-08-0386-01
GBMLGG(N=650)	0.46	2.108	TCGA-DB-A75M-01
GBMLGG(N=650)	0.4	2.6738	TCGA-HT-8012-01
GBMLGG(N=650)	0.56	2.9167	TCGA-S9-A7QW-01
GBMLGG(N=650)	0.56	1.614	TCGA-P5-A733-01
GBMLGG(N=650)	0.32	2.1213	TCGA-E1-A7Z4-01
GBMLGG(N=650)	0.7	1.6045	TCGA-DU-A5TR-01
GBMLGG(N=650)	0.58	2.2299	TCGA-FG-8185-01
GBMLGG(N=650)	0.46	2.0946	TCGA-HW-8320-01
GBMLGG(N=650)	0.46	1.5902	TCGA-CS-6667-01
GBMLGG(N=650)	0.56	2.5731	TCGA-DU-5849-01
GBMLGG(N=650)	0.7	2.9637	TCGA-DB-5279-01
GBMLGG(N=650)	1	3.7443	TCGA-06-0190-01
GBMLGG(N=650)	0.58	3.2112	TCGA-CS-6670-01
GBMLGG(N=650)	0.5	2.5061	TCGA-DB-A64V-01
GBMLGG(N=650)	0.88	3.7432	TCGA-06-0745-01
GBMLGG(N=650)	0.8	3.1426	TCGA-DU-5854-01
GBMLGG(N=650)	1.06	4.2914	TCGA-DH-A7UR-01
GBMLGG(N=650)	0.98	3.2511	TCGA-S9-A6WL-01
GBMLGG(N=650)	0.12	2.2723	TCGA-HT-7880-01
GBMLGG(N=650)	0.92	3.83	TCGA-26-5135-01
GBMLGG(N=650)	0.68	3.0127	TCGA-E1-5318-01
GBMLGG(N=650)	0.48	4.1587	TCGA-DU-6393-01
GBMLGG(N=650)	0.54	3.3235	TCGA-41-3915-01
GBMLGG(N=650)	0.38	2.96	TCGA-DU-5853-01
GBMLGG(N=650)	0.64	4.4602	TCGA-TM-A84J-01
GBMLGG(N=650)	0.68	3.5237	TCGA-FG-5962-01
GBMLGG(N=650)	0.94	2.8916	TCGA-27-1831-01
GBMLGG(N=650)	0.48	2.93	TCGA-F6-A8O4-01
GBMLGG(N=650)	0.78	4.5559	TCGA-28-1753-01
GBMLGG(N=650)	0.34	2.6441	TCGA-S9-A7R1-01
GBMLGG(N=650)	1.24	4.748	TCGA-12-5295-01
GBMLGG(N=650)	0.54	3.9608	TCGA-TM-A84M-01
GBMLGG(N=650)	0.02	2.3677	TCGA-HT-8107-01
GBMLGG(N=650)	0.36	3.154	TCGA-P5-A5ET-01
GBMLGG(N=650)	0.72	1.9712	TCGA-P5-A72W-01
GBMLGG(N=650)	0.3	2.8096	TCGA-FG-A70Y-01
GBMLGG(N=650)	0.1	2.9432	TCGA-TM-A84R-01
GBMLGG(N=650)	0.34	2.0465	TCGA-HW-A5KM-01
GBMLGG(N=650)	0.84	4.2533	TCGA-HT-7477-01
GBMLGG(N=650)	1.06	3.6463	TCGA-FG-A87Q-01
GBMLGG(N=650)	1	3.7815	TCGA-FG-A70Z-01
GBMLGG(N=650)	1.02	3.7269	TCGA-FG-A4MU-01
GBMLGG(N=650)	0.5	3.5098	TCGA-DB-A4XB-01
GBMLGG(N=650)	0.64	2.3048	TCGA-WY-A85D-01
GBMLGG(N=650)	0.46	2.9507	TCGA-FG-7641-01
GBMLGG(N=650)	0.48	1.674	TCGA-DU-5872-01
GBMLGG(N=650)	0.36	2.1345	TCGA-FG-6689-01
GBMLGG(N=650)	0.7	2.5238	TCGA-DB-5277-01
GBMLGG(N=650)	0.7	4.4027	TCGA-28-5204-01
GBMLGG(N=650)	0.64	3.1377	TCGA-HT-A615-01
GBMLGG(N=650)	0.5	2.5585	TCGA-DU-7301-01
GBMLGG(N=650)	0.28	2.4465	TCGA-P5-A5EW-01
GBMLGG(N=650)	0.58	4.5946	TCGA-06-2569-01
GBMLGG(N=650)	0.3	2.1702	TCGA-HT-A5RB-01
GBMLGG(N=650)	1.08	2.5288	TCGA-E1-A7YN-01
GBMLGG(N=650)	0.74	3.4304	TCGA-27-1830-01
GBMLGG(N=650)	0.82	3.3278	TCGA-QH-A6XC-01
GBMLGG(N=650)	0.92	4.7377	TCGA-06-2559-01
GBMLGG(N=650)	0.62	3.0199	TCGA-S9-A6WN-01
GBMLGG(N=650)	0.1	1.5806	TCGA-06-0139-01
GBMLGG(N=650)	1.38	2.1766	TCGA-DB-A64L-01
GBMLGG(N=650)	0.6	3.981	TCGA-TM-A84I-01
GBMLGG(N=650)	0.56	3.6018	TCGA-QH-A6CZ-01
GBMLGG(N=650)	0.58	1.5465	TCGA-WY-A858-01
GBMLGG(N=650)	0.44	3.2826	TCGA-VM-A8CB-01
GBMLGG(N=650)	0.86	2.6624	TCGA-27-2526-01
GBMLGG(N=650)	0.64	1.4704	TCGA-VM-A8CF-01
GBMLGG(N=650)	0.96	3.8085	TCGA-06-5856-01
GBMLGG(N=650)	0.36	2.9875	TCGA-HT-7608-01
GBMLGG(N=650)	0.28	2.828	TCGA-CS-4938-01
GBMLGG(N=650)	0.48	2.4571	TCGA-QH-A6X5-01
GBMLGG(N=650)	0.48	2.5972	TCGA-DU-8166-01
GBMLGG(N=650)	0.36	2.9262	TCGA-HT-8018-01
GBMLGG(N=650)	0.7	3.3435	TCGA-DU-7292-01
GBMLGG(N=650)	0.28	1.4494	TCGA-S9-A6TU-01
GBMLGG(N=650)	0.06	1.9895	TCGA-DB-A75P-01
GBMLGG(N=650)	0.68	3.4264	TCGA-06-5418-01
GBMLGG(N=650)	0.22	3.4556	TCGA-FG-6691-01
GBMLGG(N=650)	0.84	3.2988	TCGA-DU-6399-01
GBMLGG(N=650)	0.3	2.694	TCGA-S9-A7IQ-01
GBMLGG(N=650)	0.54	3.8054	TCGA-06-5414-01
GBMLGG(N=650)	0.4	2.1862	TCGA-S9-A6WI-01
GBMLGG(N=650)	0.18	2.2783	TCGA-DB-A64S-01
GBMLGG(N=650)	1.2	3.5994	TCGA-FG-6692-01
GBMLGG(N=650)	0.34	2.6441	TCGA-HW-7489-01
GBMLGG(N=650)	0.18	3.1572	TCGA-R8-A6YH-01
GBMLGG(N=650)	0.94	3.8501	TCGA-06-5417-01
GBMLGG(N=650)	0.4	2.1541	TCGA-HT-A618-01
GBMLGG(N=650)	0.88	1.9452	TCGA-26-5134-01
GBMLGG(N=650)	0.34	1.8119	TCGA-QH-A65S-01
GBMLGG(N=650)	0.48	2.167	TCGA-DU-7019-01
GBMLGG(N=650)	1.1	4.5644	TCGA-76-4925-01
GBMLGG(N=650)	0.68	4.3263	TCGA-DU-A7TJ-01
GBMLGG(N=650)	0.74	2.4386	TCGA-TM-A84H-01
GBMLGG(N=650)	0.48	3.66	TCGA-28-2510-01
GBMLGG(N=650)	0.5	2.9893	TCGA-S9-A7R8-01
GBMLGG(N=650)	0.42	2.1213	TCGA-S9-A7R4-01
GBMLGG(N=650)	0.46	3.4556	TCGA-S9-A7J3-01
GBMLGG(N=650)	0.36	2.6348	TCGA-TM-A84L-01
GBMLGG(N=650)	0.44	2.2872	TCGA-E1-A7YH-01
GBMLGG(N=650)	0.8	4.1044	TCGA-06-5413-01
GBMLGG(N=650)	0.58	4.1368	TCGA-06-0646-01
GBMLGG(N=650)	1.46	3.2915	TCGA-P5-A5EV-01
GBMLGG(N=650)	0.68	4.2227	TCGA-DU-A7TD-01
GBMLGG(N=650)	0.4	1.7828	TCGA-HW-A5KL-01
GBMLGG(N=650)	0.26	3.3787	TCGA-RY-A83X-01
GBMLGG(N=650)	0.7	3.492	TCGA-HT-7687-01
GBMLGG(N=650)	0.2	2.6138	TCGA-WY-A85A-01
GBMLGG(N=650)	0.84	4.701	TCGA-12-3650-01
GBMLGG(N=650)	0.92	2.8158	TCGA-DB-5281-01
GBMLGG(N=650)	0.92	2.1476	TCGA-E1-A7YK-01
GBMLGG(N=650)	0.72	1.9188	TCGA-DU-A5TU-01
GBMLGG(N=650)	0.64	2.59	TCGA-DU-A7TA-01
GBMLGG(N=650)	0.74	3.8095	TCGA-CS-5395-01
GBMLGG(N=650)	0.44	2.2113	TCGA-TQ-A7RR-01
GBMLGG(N=650)	0.44	2.5948	TCGA-HT-A5R5-01
GBMLGG(N=650)	0.64	3.9213	TCGA-12-0616-01
GBMLGG(N=650)	0.42	2.2603	TCGA-QH-A65V-01
GBMLGG(N=650)	0.64	3.5923	TCGA-S9-A6WP-01
GBMLGG(N=650)	0.46	4.6236	TCGA-28-5215-01
GBMLGG(N=650)	1.14	2.8799	TCGA-19-2620-01
GBMLGG(N=650)	0.32	2.7292	TCGA-S9-A6U5-01
GBMLGG(N=650)	0.62	3.3563	TCGA-E1-A7YO-01
GBMLGG(N=650)	0.44	3.6509	TCGA-QH-A6X8-01
GBMLGG(N=650)	0.28	2.9692	TCGA-HT-7610-01
GBMLGG(N=650)	0.54	3.2065	TCGA-HT-7875-01
GBMLGG(N=650)	1.14	3.6312	TCGA-16-0846-01
GBMLGG(N=650)	0.44	2.6783	TCGA-R8-A6MK-01
GBMLGG(N=650)	0.52	2.9525	TCGA-P5-A5F0-01
GBMLGG(N=650)	0.52	2.872	TCGA-R8-A73M-01
GBMLGG(N=650)	1.16	3.6054	TCGA-02-0047-01
GBMLGG(N=650)	1.12	1.9527	TCGA-S9-A6TS-01
GBMLGG(N=650)	0.52	2.3222	TCGA-S9-A6TW-01
GBMLGG(N=650)	0.52	2.7314	TCGA-E1-5303-01
GBMLGG(N=650)	0.46	4.2297	TCGA-HT-7606-01
GBMLGG(N=650)	0.3	3.2018	TCGA-DU-6408-01
GBMLGG(N=650)	0.66	3.1507	TCGA-FG-5964-01
GBMLGG(N=650)	0.36	3.186	TCGA-DB-A64Q-01
GBMLGG(N=650)	0.48	2.8034	TCGA-S9-A7IZ-01
GBMLGG(N=650)	1.22	3.0757	TCGA-S9-A6WH-01
GBMLGG(N=650)	0.24	2.3788	TCGA-HT-7602-01
GBMLGG(N=650)	0.7	4.7033	TCGA-19-2624-01
GBMLGG(N=650)	0.9	3.002	TCGA-DU-A6S8-01
GBMLGG(N=650)	0.34	2.5972	TCGA-HT-7858-01
GBMLGG(N=650)	1.16	3.0217	TCGA-32-1982-01
GBMLGG(N=650)	1.16	3.6289	TCGA-27-1835-01
GBMLGG(N=650)	1.2	3.6916	TCGA-HT-7860-01
GBMLGG(N=650)	1.04	3.6657	TCGA-DU-7006-01
GBMLGG(N=650)	0.3	2.685	TCGA-TQ-A7RS-01
GBMLGG(N=650)	0.34	3.0533	TCGA-DU-7009-01
GBMLGG(N=650)	1.26	3.1393	TCGA-06-0747-01
GBMLGG(N=650)	1.62	3.66	TCGA-DU-7010-01
GBMLGG(N=650)	0.4	2.6783	TCGA-QH-A6X3-01
GBMLGG(N=650)	0.6	3.2781	TCGA-DU-8164-01
GBMLGG(N=650)	0.6	3.5449	TCGA-DU-7018-01
GBMLGG(N=650)	0.3	3.0376	TCGA-RY-A843-01
GBMLGG(N=650)	0.56	2.4412	TCGA-HT-7693-01
GBMLGG(N=650)	1.12	3.2297	TCGA-FG-A6J3-01
GBMLGG(N=650)	0.58	3.2297	TCGA-28-5220-01
GBMLGG(N=650)	0.52	2.5238	TCGA-HT-8106-01
GBMLGG(N=650)	0.28	3.0654	TCGA-HT-7472-01
GBMLGG(N=650)	1.2	3.1701	TCGA-14-0817-01
GBMLGG(N=650)	0.6	1.6649	TCGA-HT-7855-01
GBMLGG(N=650)	0.56	3.7709	TCGA-06-2570-01
GBMLGG(N=650)	0.34	3.6136	TCGA-DB-A4XG-01
GBMLGG(N=650)	0.84	3.6486	TCGA-HT-A5RC-01
GBMLGG(N=650)	0.64	2.3508	TCGA-VM-A8C8-01
GBMLGG(N=650)	0.22	2.4198	TCGA-HT-7681-01
GBMLGG(N=650)	0.52	3.8033	TCGA-41-4097-01
GBMLGG(N=650)	0.28	2.4649	TCGA-DU-A6S2-01
GBMLGG(N=650)	0.6	2.8034	TCGA-DU-7309-01
GBMLGG(N=650)	0.66	2.108	TCGA-DB-A4XH-01
GBMLGG(N=650)	0.26	3.3307	TCGA-HT-7485-01
GBMLGG(N=650)	0.6	2.3077	TCGA-VW-A7QS-01
GBMLGG(N=650)	0.94	4.34242	TCGA-06-0211-01
GBMLGG(N=650)	0.22	2.2753	TCGA-VV-A86M-01
GBMLGG(N=650)	0.68	4.6212	TCGA-E1-A7YV-01
GBMLGG(N=650)	0.26	3.5706	TCGA-HT-7468-01
GBMLGG(N=650)	0.76	4.3133	TCGA-02-2483-01
GBMLGG(N=650)	0.64	3.5237	TCGA-HT-7677-01
GBMLGG(N=650)	0.72	4.7154	TCGA-76-4931-01
GBMLGG(N=650)	0.82	2.5388	TCGA-DU-A5TY-01
GBMLGG(N=650)	0.62	2.8622	TCGA-HT-8109-01
GBMLGG(N=650)	0.46	2.118	TCGA-HT-7479-01
GBMLGG(N=650)	0.7	3.0825	TCGA-DB-5275-01
GBMLGG(N=650)	0.62	2.578	TCGA-TM-A7C4-01
GBMLGG(N=650)	0.78	4.215	TCGA-27-2523-01
GBMLGG(N=650)	0.68	3.9204	TCGA-27-1837-01
GBMLGG(N=650)	0.76	3.5875	TCGA-DH-A7UU-01
GBMLGG(N=650)	1.18	3.0927	TCGA-06-0744-01
GBMLGG(N=650)	0.28	2.3788	TCGA-HT-A4DV-01
GBMLGG(N=650)	0.48	2.9128	TCGA-FG-8186-01
GBMLGG(N=650)	0.28	3.186	TCGA-FG-A4MT-01
GBMLGG(N=650)	0.5	3.3221	TCGA-E1-5305-01
GBMLGG(N=650)	0.38	2.4306	TCGA-CS-5393-01
GBMLGG(N=650)	0.36	2.6371	TCGA-DU-6395-01
GBMLGG(N=650)	1.12	1.6187	TCGA-DB-A64X-01
GBMLGG(N=650)	0.88	4.7367	TCGA-S9-A7IS-01
GBMLGG(N=650)	4.28	3.0163	TCGA-HT-7856-01
GBMLGG(N=650)	0.68	2.7679	TCGA-06-0750-01
GBMLGG(N=650)	1.04	3.3717	TCGA-32-5222-01
GBMLGG(N=650)	0.18	2.5437	TCGA-QH-A6XA-01
GBMLGG(N=650)	0.44	2.2144	TCGA-P5-A77W-01
GBMLGG(N=650)	0.74	3.3364	TCGA-27-2519-01
GBMLGG(N=650)	0.42	3.2959	TCGA-CS-4942-01
GBMLGG(N=650)	0.9	3.4411	TCGA-CS-6186-01
GBMLGG(N=650)	0.48	3.4358	TCGA-DU-7008-01
GBMLGG(N=650)	1.24	2.8701	TCGA-HT-7688-01
GBMLGG(N=650)	0.3	2.9205	TCGA-DU-A7T8-01
GBMLGG(N=650)	0.5	2.2663	TCGA-DU-A6S3-01
GBMLGG(N=650)	0.18	2.7117	TCGA-DB-A64U-01
GBMLGG(N=650)	0.74	5.0756	TCGA-HT-A61C-01
GBMLGG(N=650)	1.18	3.8085	TCGA-12-0821-01
GBMLGG(N=650)	0.36	2.876	TCGA-TQ-A7RF-01
GBMLGG(N=650)	0.84	4.2795	TCGA-19-2619-01
GBMLGG(N=650)	0.38	3.4752	TCGA-F6-A8O3-01
GBMLGG(N=650)	0.38	3.1829	TCGA-R8-A6ML-01
GBMLGG(N=650)	0.84	2.8219	TCGA-DU-A5TT-01
GBMLGG(N=650)	0.34	2.6962	TCGA-QH-A870-01
GBMLGG(N=650)	0.32	2.376	TCGA-DB-A75O-01
GBMLGG(N=650)	0.24	3.034	TCGA-HT-8111-01
GBMLGG(N=650)	1.02	3.1491	TCGA-S9-A7QZ-01
GBMLGG(N=650)	0.94	3.6497	TCGA-12-0619-01
GBMLGG(N=650)	0.28	2.7636	TCGA-DB-5273-01
GBMLGG(N=650)	0.72	2.8381	TCGA-HT-7470-01
GBMLGG(N=650)	0.58	2.4386	TCGA-FG-A4MY-01
GBMLGG(N=650)	0.28	2.7401	TCGA-HT-8108-01
GBMLGG(N=650)	0.44	3.741	TCGA-DB-A4XE-01
GBMLGG(N=650)	0.6	4.1359	TCGA-HT-A4DS-01
GBMLGG(N=650)	0.62	3.208	TCGA-DU-8158-01
GBMLGG(N=650)	0.32	2.4386	TCGA-HT-7474-01
GBMLGG(N=650)	0.52	2.9338	TCGA-DH-5143-01
GBMLGG(N=650)	0.68	2.6418	TCGA-TQ-A7RJ-01
GBMLGG(N=650)	0.66	2.0979	TCGA-S9-A7QY-01
GBMLGG(N=650)	0.22	2.7993	TCGA-DB-A4XA-01
GBMLGG(N=650)	0.84	2.6325	TCGA-28-5213-01
GBMLGG(N=650)	0.42	2.3423	TCGA-P5-A731-01
GBMLGG(N=650)	1.12	3.3633	TCGA-E1-A7YE-01
GBMLGG(N=650)	0.56	3.0893	TCGA-FG-A710-01
GBMLGG(N=650)	0.22	2.7636	TCGA-HT-8010-01
GBMLGG(N=650)	0.4	2.7572	TCGA-DU-7299-01
GBMLGG(N=650)	0.34	2.5683	TCGA-DB-5270-01
GBMLGG(N=650)	1.08	2.7721	TCGA-14-0789-01
GBMLGG(N=650)	0.16	3.4907	TCGA-KT-A74X-01
GBMLGG(N=650)	0.6	2.7379	TCGA-DB-A75L-01
GBMLGG(N=650)	0.34	2.2237	TCGA-HT-A616-01
GBMLGG(N=650)	0.56	2.5288	TCGA-HT-A74K-01
GBMLGG(N=650)	0.56	2.0776	TCGA-WY-A85C-01
GBMLGG(N=650)	0.46	2.6348	TCGA-FG-8188-01
GBMLGG(N=650)	0.44	2.8877	TCGA-DU-A6S7-01
GBMLGG(N=650)	0.34	3.1245	TCGA-DU-7294-01
GBMLGG(N=650)	0.66	2.7444	TCGA-DB-5274-01
GBMLGG(N=650)	1.5	4.3111	TCGA-28-5209-01
GBMLGG(N=650)	0.72	3.2359	TCGA-HT-7604-01
GBMLGG(N=650)	0.36	3.0859	TCGA-TM-A84F-01
GBMLGG(N=650)	0.34	2.5338	TCGA-DB-A64O-01
GBMLGG(N=650)	0.62	2.982	TCGA-HT-7884-01
GBMLGG(N=650)	0.18	2.7336	TCGA-S9-A6WE-01
GBMLGG(N=650)	0.3	2.6647	TCGA-QH-A6CY-01
GBMLGG(N=650)	1.06	3.8411	TCGA-S9-A6WM-01
GBMLGG(N=650)	0.32	4.0567	TCGA-28-5218-01
GBMLGG(N=650)	0.72	4.1628	TCGA-HT-A5RA-01
GBMLGG(N=650)	0.82	3.6703	TCGA-QH-A6CV-01
GBMLGG(N=650)	0.2	2.6805	TCGA-VM-A8CE-01
GBMLGG(N=650)	1.18	3.5362	TCGA-DU-5852-01
GBMLGG(N=650)	0.94	2.5536	TCGA-P5-A72U-01
GBMLGG(N=650)	0.88	4.0064	TCGA-28-2514-01
GBMLGG(N=650)	0.78	4.5142	TCGA-06-5859-01
GBMLGG(N=650)	0.58	2.7508	TCGA-DB-A75K-01
GBMLGG(N=650)	0.66	3.5959	TCGA-DU-6410-01
GBMLGG(N=650)	0.88	3.7204	TCGA-28-2509-01
GBMLGG(N=650)	0.56	2.6873	TCGA-QH-A65Z-01
GBMLGG(N=650)	0.92	4.7198	TCGA-14-1825-01
GBMLGG(N=650)	0.52	2.6693	TCGA-S9-A7IY-01
GBMLGG(N=650)	0.26	2.6602	TCGA-P5-A781-01
GBMLGG(N=650)	0.52	4.1027	TCGA-TM-A84G-01
GBMLGG(N=650)	0.68	2.8582	TCGA-HW-A5KK-01
GBMLGG(N=650)	0.3	3.1523	TCGA-E1-5311-01
GBMLGG(N=650)	0.3	3.7688	TCGA-FG-7634-01
GBMLGG(N=650)	0.7	2.0844	TCGA-DU-5855-01
GBMLGG(N=650)	0.66	2.1702	TCGA-DU-6396-01
GBMLGG(N=650)	0.82	3.3842	TCGA-19-4065-01
GBMLGG(N=650)	0.82	2.8916	TCGA-FG-7643-01
GBMLGG(N=650)	0.28	2.6043	TCGA-TM-A84C-01
GBMLGG(N=650)	1	3.6172	TCGA-02-2485-01
GBMLGG(N=650)	1.04	2.7889	TCGA-WY-A85E-01
GBMLGG(N=650)	1.04	3.6254	TCGA-12-1597-01
GBMLGG(N=650)	0.84	4.0375	TCGA-28-1747-01
GBMLGG(N=650)	0.52	2.5313	TCGA-28-2499-01
GBMLGG(N=650)	0.62	3.8876	TCGA-DU-7298-01
GBMLGG(N=650)	0.42	2.05	TCGA-TM-A84T-01
GBMLGG(N=650)	0.52	2.9413	TCGA-FG-7637-01
GBMLGG(N=650)	0.56	3.4945	TCGA-HT-A5R9-01
GBMLGG(N=650)	0.56	2.5536	TCGA-HT-A614-01
GBMLGG(N=650)	1.48	2.9618	TCGA-06-0649-01
GBMLGG(N=650)	0.56	3.0706	TCGA-QH-A65R-01
GBMLGG(N=650)	0.66	3.0961	TCGA-FG-A60J-01
GBMLGG(N=650)	0.08	2.8858	TCGA-FG-8189-01
GBMLGG(N=650)	0.04	2.6371	TCGA-P5-A5EY-01
GBMLGG(N=650)	1	4.2312	TCGA-06-2564-01
GBMLGG(N=650)	0.72	4.0584	TCGA-06-5408-01
GBMLGG(N=650)	0.6	3.1162	TCGA-27-1832-01
GBMLGG(N=650)	0.72	2.694	TCGA-14-1829-01
GBMLGG(N=650)	0.54	3.0234	TCGA-32-2615-01
GBMLGG(N=650)	0.84	4.0001	TCGA-06-0158-01
GBMLGG(N=650)	0.76	2.5238	TCGA-HT-7882-01
GBMLGG(N=650)	1.28	3.9506	TCGA-06-2558-01
GBMLGG(N=650)	0.92	4.6502	TCGA-HT-8011-01
GBMLGG(N=650)	0.5	3.5559	TCGA-DU-6394-01
GBMLGG(N=650)	0.72	3.6405	TCGA-28-5216-01
GBMLGG(N=650)	0.5	3.1112	TCGA-WY-A859-01
GBMLGG(N=650)	0.22	2.7572	TCGA-WY-A85B-01
GBMLGG(N=650)	0.42	3.5449	TCGA-S9-A6UB-01
GBMLGG(N=650)	0.78	3.4517	TCGA-28-5207-01
GBMLGG(N=650)	0.6	3.3717	TCGA-S9-A6U6-01
GBMLGG(N=650)	0.82	4.4344	TCGA-DU-8168-01
GBMLGG(N=650)	0.8	3.2929	TCGA-41-2572-01
GBMLGG(N=650)	0.54	3.0757	TCGA-06-0130-01
GBMLGG(N=650)	0.6	3.0481	TCGA-DU-7290-01
GBMLGG(N=650)	204.9	3.9232	TCGA-06-5416-01
GBMLGG(N=650)	0.66	3.863	TCGA-06-0168-01
GBMLGG(N=650)	0.36	3.5387	TCGA-DU-6407-01
GBMLGG(N=650)	0.92	2.2421	TCGA-02-0055-01
GBMLGG(N=650)	0.38	3.0463	TCGA-HT-7601-01
GBMLGG(N=650)	0.98	4.6804	TCGA-DU-6403-01
GBMLGG(N=650)	0.86	3.9022	TCGA-06-5415-01
GBMLGG(N=650)	0.28	2.7679	TCGA-DB-A64R-01
GBMLGG(N=650)	0.58	3.1924	TCGA-E1-A7YQ-01
GBMLGG(N=650)	0.94	4.1103	TCGA-DU-6405-01
GBMLGG(N=650)	0.3	2.4225	TCGA-HW-7487-01
GBMLGG(N=650)	0.68	2.4701	TCGA-S9-A7R2-01
GBMLGG(N=650)	0.38	3.1011	TCGA-S9-A7J1-01
GBMLGG(N=650)	0.18	2.2663	TCGA-P5-A72X-01
GBMLGG(N=650)	0.62	3.4596	TCGA-E1-A7YJ-01
GBMLGG(N=650)	0.48	3.5362	TCGA-06-5411-01
GBMLGG(N=650)	0.74	3.5461	TCGA-26-5139-01
GBMLGG(N=650)	0.42	2.7993	TCGA-HT-7690-01
GBMLGG(N=650)	0.64	2.7993	TCGA-HT-8105-01
GBMLGG(N=650)	1.32	3.0038	TCGA-76-4928-01
GBMLGG(N=650)	0.9	3.9496	TCGA-06-0644-01
GBMLGG(N=650)	0.14	3.034	TCGA-E1-A7YY-01
GBMLGG(N=650)	0.88	3.1311	TCGA-HT-A619-01
GBMLGG(N=650)	0.8	3.1844	TCGA-DU-6400-01
GBMLGG(N=650)	0.36	2.9948	TCGA-P5-A737-01
GBMLGG(N=650)	0.94	4.178	TCGA-14-0871-01
GBMLGG(N=650)	0.64	3.0428	TCGA-RY-A83Y-01
GBMLGG(N=650)	8.14	3.055	TCGA-HT-8564-01
GBMLGG(N=650)	0.32	2.3871	TCGA-HT-7686-01
GBMLGG(N=650)	0.68	3.3492	TCGA-E1-A7YM-01
GBMLGG(N=650)	0.32	2.4252	TCGA-DH-A66F-01
GBMLGG(N=650)	0.74	3.3911	TCGA-CS-5390-01
GBMLGG(N=650)	0.68	3.5324	TCGA-S9-A6UA-01
GBMLGG(N=650)	1.54	3.2557	TCGA-32-2632-01
GBMLGG(N=650)	0.46	4.5547	TCGA-FG-A87N-01
GBMLGG(N=650)	0.58	3.0533	TCGA-VV-A829-01
GBMLGG(N=650)	0.74	2.8381	TCGA-DH-A66B-01
GBMLGG(N=650)	0.44	2.9655	TCGA-HT-A5R7-01
GBMLGG(N=650)	0.46	3.6405	TCGA-CS-5394-01
GBMLGG(N=650)	0.8	2.8562	TCGA-DH-A66D-01
GBMLGG(N=650)	0.26	3.154	TCGA-HT-7877-01
GBMLGG(N=650)	0.58	3.2885	TCGA-06-0882-01
GBMLGG(N=650)	0.44	3.1228	TCGA-DU-6542-01
GBMLGG(N=650)	0.32	2.3048	TCGA-QH-A6CS-01
GBMLGG(N=650)	0.42	3.5174	TCGA-E1-A7YU-01
GBMLGG(N=650)	0.46	2.8321	TCGA-W9-A837-01
GBMLGG(N=650)	0.72	3.0181	TCGA-IK-7675-01
GBMLGG(N=650)	1	2.5263	TCGA-DU-7306-01
GBMLGG(N=650)	0.8	2.9784	TCGA-QH-A6X9-01
GBMLGG(N=650)	0.66	3.4556	TCGA-S9-A6U0-01
GBMLGG(N=650)	0.52	2.7636	TCGA-HT-7611-01
GBMLGG(N=650)	0.34	3.0791	TCGA-S9-A6TY-01
GBMLGG(N=650)	0.58	2.6161	TCGA-DU-A7TB-01
GBMLGG(N=650)	0.98	2.8838	TCGA-19-2625-01
GBMLGG(N=650)	0.9	3.0774	TCGA-IK-8125-01
GBMLGG(N=650)	0.68	1.4547	TCGA-WH-A86K-01
GBMLGG(N=650)	0.42	2.0218	TCGA-DH-5141-01
GBMLGG(N=650)	0.44	2.5163	TCGA-FG-A60L-01
GBMLGG(N=650)	0.36	2.5288	TCGA-DB-5280-01
GBMLGG(N=650)	0.52	3.7149	TCGA-S9-A7IX-01
GBMLGG(N=650)	0.24	3.1344	TCGA-32-1980-01
GBMLGG(N=650)	0.7	3.0498	TCGA-FG-5965-01
GBMLGG(N=650)	0.02	2.1378	TCGA-P5-A5F6-01
GBMLGG(N=650)	0.8	4.1011	TCGA-27-1834-01
GBMLGG(N=650)	0.66	2.5036	TCGA-DU-7007-01
GBMLGG(N=650)	0.68	1.2271	TCGA-HW-7490-01
GBMLGG(N=650)	0.6	4.1111	TCGA-CS-6188-01
GBMLGG(N=650)	0.34	3.9938	TCGA-CS-6668-01
GBMLGG(N=650)	1.16	4.0722	TCGA-DU-8165-01
GBMLGG(N=650)	0.4	2.4386	TCGA-HT-7692-01
GBMLGG(N=650)	1.2	5.3862	TCGA-TQ-A7RM-01
GBMLGG(N=650)	0.7	3.6972	TCGA-DU-8161-01
GBMLGG(N=650)	0.56	1.6512	TCGA-P5-A736-01
GBMLGG(N=650)	0.42	1.0847	TCGA-DU-6401-01
GBMLGG(N=650)	0.86	2.1606	TCGA-HT-A74H-01
GBMLGG(N=650)	0.76	3.0842	TCGA-41-2571-01
GBMLGG(N=650)	0.4	2.6138	TCGA-TQ-A7RV-01
GBMLGG(N=650)	0.52	2.5363	TCGA-14-0781-01
GBMLGG(N=650)	0.22	2.982	TCGA-HT-7483-01
GBMLGG(N=650)	0.3	2.7139	TCGA-HT-7620-01
GBMLGG(N=650)	0.44	2.8622	TCGA-HT-7480-01
GBMLGG(N=650)	0.86	4.2266	TCGA-06-0157-01
GBMLGG(N=650)	0.74	4.9426	TCGA-S9-A7J0-01
GBMLGG(N=650)	0.52	4.4108	TCGA-12-3653-01
GBMLGG(N=650)	0.5	2.945	TCGA-TM-A84Q-01
GBMLGG(N=650)	1.02	4.0807	TCGA-76-4926-01
GBMLGG(N=650)	0.58	4.2781	TCGA-26-5133-01
GBMLGG(N=650)	1.08	3.1442	TCGA-06-2562-01
GBMLGG(N=650)	0.28	2.7051	TCGA-RY-A847-01
GBMLGG(N=650)	0.44	3.4971	TCGA-TQ-A7RQ-01
GBMLGG(N=650)	0.7	3.0074	TCGA-TQ-A7RW-01
GBMLGG(N=650)	0.36	2.4412	TCGA-FG-8191-01
GBMLGG(N=650)	0.34	2.9692	TCGA-E1-A7YW-01
GBMLGG(N=650)	0.12	2.8482	TCGA-DB-5278-01
GBMLGG(N=650)	0.96	3.7094	TCGA-E1-A7YS-01
GBMLGG(N=650)	0.26	3.1045	TCGA-HT-7695-01
GBMLGG(N=650)	0.9	3.2267	TCGA-DU-7012-01
GBMLGG(N=650)	0.26	2.909	TCGA-HT-7879-01
GBMLGG(N=650)	0.42	2.6278	TCGA-DU-A7TC-01
GBMLGG(N=650)	0.98	3.1908	TCGA-27-2521-01
GBMLGG(N=650)	0.02	2.685	TCGA-HT-7680-01
GBMLGG(N=650)	0.44	3.4622	TCGA-DB-A4X9-01
GBMLGG(N=650)	0.54	3.011	TCGA-TQ-A7RI-01
GBMLGG(N=650)	0.62	2.9243	TCGA-TM-A7CA-01
GBMLGG(N=650)	0.36	3.1604	TCGA-QH-A86X-01
GBMLGG(N=650)	0.72	3.3076	TCGA-DU-A76R-01
GBMLGG(N=650)	0.58	3.0671	TCGA-DH-5144-01
GBMLGG(N=650)	1.38	4.382	TCGA-41-5651-01
GBMLGG(N=650)	0.54	3.7335	TCGA-E1-A7Z2-01
GBMLGG(N=650)	0.54	2.5288	TCGA-DU-A5TP-01
GBMLGG(N=650)	1.02	2.376	TCGA-06-0210-01
GBMLGG(N=650)	0.26	2.5112	TCGA-FG-8187-01
GBMLGG(N=650)	0.6	5.1351	TCGA-E1-5304-01
GBMLGG(N=650)	0.42	4.2803	TCGA-CS-4943-01
GBMLGG(N=650)	0.74	4.613	TCGA-19-5960-01
GBMLGG(N=650)	1.02	4.1772	TCGA-06-0686-01
GBMLGG(N=650)	0.4	4.5596	TCGA-DH-5140-01
GBMLGG(N=650)	0.66	1.9452	TCGA-TM-A7CF-01
GBMLGG(N=650)	0.6	3.0842	TCGA-DH-A7US-01
GBMLGG(N=650)	0.66	3.0074	TCGA-HT-A61B-01
GBMLGG(N=650)	0.3	2.5388	TCGA-E1-A7Z6-01
GBMLGG(N=650)	0.26	2.4063	TCGA-HT-7857-01
GBMLGG(N=650)	0.66	2.8055	TCGA-E1-5319-01
GBMLGG(N=650)	0.66	1.3956	TCGA-DU-A5TS-01
GBMLGG(N=650)	192.7	3.3563	TCGA-DU-6392-01
GBMLGG(N=650)	0.3	1.7273	TCGA-QH-A6CU-01
GBMLGG(N=650)	0.2	3.2251	TCGA-DU-6404-01
GBMLGG(N=650)	0.8	3.4477	TCGA-VW-A8FI-01
GBMLGG(N=650)	0.24	3.3278	TCGA-HT-A74L-01
GBMLGG(N=650)	0.44	4.2434	TCGA-P5-A5EU-01
GBMLGG(N=650)	0.68	2.1247	TCGA-P5-A5EZ-01
GBMLGG(N=650)	1.12	3.2267	TCGA-S9-A89Z-01
GBMLGG(N=650)	0.48	2.6019	TCGA-S9-A6TZ-01
GBMLGG(N=650)	0.54	3.6635	TCGA-FG-5963-01
GBMLGG(N=650)	0.14	2.4063	TCGA-HT-A61A-01
GBMLGG(N=650)	0.78	2.0912	TCGA-S9-A89V-01
GBMLGG(N=650)	0.72	4.3456	TCGA-DB-A64W-01
GBMLGG(N=650)	0.46	1.5115	TCGA-FG-A4MX-01
GBMLGG(N=650)	0.5	3.3703	TCGA-P5-A72Z-01
GBMLGG(N=650)	0.36	2.3843	TCGA-HT-8114-01
GBMLGG(N=650)	1.18	3.7982	TCGA-06-2563-01
GBMLGG(N=650)	0.76	2.183	TCGA-32-4213-01
GBMLGG(N=650)	0.18	2.5561	TCGA-HT-7881-01
GBMLGG(N=650)	1.2	3.928	TCGA-15-0742-01
GBMLGG(N=650)	0.36	1.8201	TCGA-CS-4944-01
GBMLGG(N=650)	0.8	3.5237	TCGA-06-0187-01
GBMLGG(N=650)	1.7	5.1879	TCGA-19-1390-01
GBMLGG(N=650)	0.46	2.4727	TCGA-S9-A7QX-01
GBMLGG(N=650)	0.2	2.5087	TCGA-DU-A7TG-01
GBMLGG(N=650)	0.7	4.0118	TCGA-DU-5874-01
GBMLGG(N=650)	0.66	2.8994	TCGA-TQ-A8XE-01
GBMLGG(N=650)	0.82	2.9674	TCGA-DU-7300-01
GBMLGG(N=650)	0.62	2.9356	TCGA-HT-7694-01
GBMLGG(N=650)	0.24	4.0748	TCGA-HT-7471-01
GBMLGG(N=650)	0.58	2.9469	TCGA-DB-A4XD-01
GBMLGG(N=650)	0.44	3.0688	TCGA-TQ-A7RK-01
GBMLGG(N=650)	0.86	2.6371	TCGA-HT-7475-01
GBMLGG(N=650)	0.3	3.7614	TCGA-TQ-A7RO-01
GBMLGG(N=650)	0.48	2.7292	TCGA-HT-7902-01
GBMLGG(N=650)	0.66	2.9911	TCGA-FG-A711-01
GBMLGG(N=650)	0.68	3.6184	TCGA-06-2557-01
GBMLGG(N=650)	0.28	2.5948	TCGA-DB-5276-01
GBMLGG(N=650)	0.42	2.3394	TCGA-P5-A730-01
GBMLGG(N=650)	0.92	4.2736	TCGA-E1-A7YD-01
GBMLGG(N=650)	0.38	2.1574	TCGA-HT-A74O-01
GBMLGG(N=650)	0.04	3.1045	TCGA-HT-8015-01
GBMLGG(N=650)	0.42	2.5487	TCGA-HT-A74J-01
GBMLGG(N=650)	0.64	3.5035	TCGA-06-0878-01
GBMLGG(N=650)	0.98	4.1036	TCGA-DH-A669-01
GBMLGG(N=650)	0.66	4.5293	TCGA-06-0129-01
GBMLGG(N=650)	0.34	2.6715	TCGA-HT-A617-01
GBMLGG(N=650)	1.2	2.9857	TCGA-16-1045-01
GBMLGG(N=650)	0.86	4.546	TCGA-06-2567-01
GBMLGG(N=650)	18.58	3.5863	TCGA-32-2616-01
GBMLGG(N=650)	0.5	2.7073	TCGA-HT-7605-01
GBMLGG(N=650)	0.54	2.7805	TCGA-S9-A6WO-01
GBMLGG(N=650)	1.02	3.958	TCGA-28-5208-01
GBMLGG(N=650)	1.2	4.0091	TCGA-06-1804-01
GBMLGG(N=650)	0.58	2.7183	TCGA-QH-A6CX-01
GBMLGG(N=650)	1.18	3.0038	TCGA-14-2554-01
GBMLGG(N=650)	0.58	2.6255	TCGA-P5-A5F4-01
GBMLGG(N=650)	0.88	3.2174	TCGA-DU-A76K-01
GBMLGG(N=650)	0.12	2.2931	TCGA-VM-A8CH-01
GBMLGG(N=650)	0.44	2.004	TCGA-HT-7609-01
GBMLGG(N=650)	1	4.2706	TCGA-27-2528-01
GBMLGG(N=650)	0.38	3.2915	TCGA-QH-A6X4-01
GBMLGG(N=650)	0.56	2.036	TCGA-DH-A7UV-01
GBMLGG(N=650)	1.12	2.93	TCGA-TM-A7C3-01
GBMLGG(N=650)	0.32	3.5645	TCGA-S9-A6WG-01
GBMLGG(N=650)	3.04	4.3053	TCGA-06-5858-01
GBMLGG(N=650)	0.54	3.1442	TCGA-FG-6690-01
GBMLGG(N=650)	0.9	2.4386	TCGA-DU-8167-01
GBMLGG(N=650)	0.46	2.7657	TCGA-QH-A65X-01
GBMLGG(N=650)	0.7	1.7617	TCGA-P5-A780-01
GBMLGG(N=650)	0.56	3.417	TCGA-E1-5302-01
GBMLGG(N=650)	1.08	2.05	TCGA-14-1823-01
GBMLGG(N=650)	0.62	1.7009	TCGA-HW-A5KJ-01
GBMLGG(N=650)	0.58	2.9356	TCGA-R8-A6MO-01
GBMLGG(N=650)	0.74	2.5511	TCGA-FG-7636-01
GBMLGG(N=650)	0.34	2.1147	TCGA-CS-6290-01
GBMLGG(N=650)	0.66	3.9327	TCGA-DU-5847-01
GBMLGG(N=650)	0.14	4.6514	TCGA-DU-6406-01
GBMLGG(N=650)	1.54	2.7763	TCGA-06-0743-01
GBMLGG(N=650)	0.5	3.7028	TCGA-TM-A84B-01
LGG(N=501)	0.18	2.8819	TCGA-S9-A7J2-01
LGG(N=501)	0.8	5.1065	TCGA-E1-A7YI-01
LGG(N=501)	0.7	3.3717	TCGA-DU-7302-01
LGG(N=501)	0.4	2.043	TCGA-P5-A5EX-01
LGG(N=501)	0.42	3.2826	TCGA-HT-8563-01
LGG(N=501)	0.4	3.0074	TCGA-FG-A60K-01
LGG(N=501)	0.6	3.7291	TCGA-CS-5397-01
LGG(N=501)	0.4	3.5337	TCGA-E1-5322-01
LGG(N=501)	0.08	2.233	TCGA-HT-8558-01
LGG(N=501)	0.44	2.3816	TCGA-S9-A6U8-01
LGG(N=501)	0.38	2.2051	TCGA-HT-7854-01
LGG(N=501)	0.52	2.7073	TCGA-HT-7467-01
LGG(N=501)	0.48	2.7826	TCGA-HT-7874-01
LGG(N=501)	0.66	2.9469	TCGA-S9-A6TV-01
LGG(N=501)	0.36	4.0348	TCGA-VM-A8CD-01
LGG(N=501)	0.74	2.8034	TCGA-HT-7616-01
LGG(N=501)	0.7	4.6294	TCGA-KT-A7W1-01
LGG(N=501)	0.54	2.9167	TCGA-P5-A5F2-01
LGG(N=501)	0.48	3.2174	TCGA-HT-7607-01
LGG(N=501)	0.46	3.3379	TCGA-HT-7873-01
LGG(N=501)	0.42	1.7316	TCGA-HT-7603-01
LGG(N=501)	0.5	3.1604	TCGA-DB-A64P-01
LGG(N=501)	0.16	2.9148	TCGA-HW-7486-01
LGG(N=501)	0.32	2.3816	TCGA-P5-A5F1-01
LGG(N=501)	0.34	1.6649	TCGA-DU-7011-01
LGG(N=501)	0.54	2.8602	TCGA-P5-A77X-01
LGG(N=501)	0.46	1.9786	TCGA-VM-A8CA-01
LGG(N=501)	0.64	2.5036	TCGA-DU-7015-01
LGG(N=501)	0.5	2.7951	TCGA-TM-A7C5-01
LGG(N=501)	0.4	3.002	TCGA-DU-8162-01
LGG(N=501)	0.5	2.6464	TCGA-TM-A84O-01
LGG(N=501)	0.54	2.5112	TCGA-S9-A7R3-01
LGG(N=501)	0.44	3.034	TCGA-TQ-A7RN-01
LGG(N=501)	0.22	2.676	TCGA-DU-A6S6-01
LGG(N=501)	0.48	2.4883	TCGA-P5-A735-01
LGG(N=501)	0.08	2.5238	TCGA-HT-7691-01
LGG(N=501)	0.32	2.3816	TCGA-FG-A6J1-01
LGG(N=501)	0.42	2.496	TCGA-S9-A7R7-01
LGG(N=501)	0.74	3.4752	TCGA-DU-6402-01
LGG(N=501)	0.6	0.6969	TCGA-HT-7684-01
LGG(N=501)	1	4.1384	TCGA-HT-8104-01
LGG(N=501)	0.36	2.8014	TCGA-FN-7833-01
LGG(N=501)	0.34	2.376	TCGA-HT-7473-01
LGG(N=501)	0.46	3.7028	TCGA-TQ-A7RU-01
LGG(N=501)	0.52	2.6783	TCGA-DB-A4XF-01
LGG(N=501)	0.42	2.4465	TCGA-FG-A713-01
LGG(N=501)	0.86	3.6916	TCGA-E1-A7YL-01
LGG(N=501)	0.52	3.4007	TCGA-CS-5396-01
LGG(N=501)	0.48	3.9232	TCGA-HW-8322-01
LGG(N=501)	0.34	2.1345	TCGA-S9-A6U9-01
LGG(N=501)	0.24	2.824	TCGA-HT-7676-01
LGG(N=501)	0.58	3.6816	TCGA-HT-7469-01
LGG(N=501)	0.52	2.5683	TCGA-HT-7478-01
LGG(N=501)	0.76	2.0147	TCGA-DU-A5TW-01
LGG(N=501)	0.6	2.6185	TCGA-S9-A6TX-01
LGG(N=501)	0.86	3.6703	TCGA-RY-A83Z-01
LGG(N=501)	0.88	2.9262	TCGA-FG-A6IZ-01
LGG(N=501)	0.88	3.3521	TCGA-CS-4941-01
LGG(N=501)	0.32	1.8801	TCGA-DH-A7UT-01
LGG(N=501)	0.48	1.692	TCGA-DU-5871-01
LGG(N=501)	0.54	2.128	TCGA-HW-8321-01
LGG(N=501)	0.42	3.7356	TCGA-EZ-7264-01
LGG(N=501)	0.66	2.6348	TCGA-CS-6666-01
LGG(N=501)	0.26	3.7269	TCGA-HW-7491-01
LGG(N=501)	0.3	3.3435	TCGA-S9-A6U1-01
LGG(N=501)	1.04	2.8117	TCGA-E1-5307-01
LGG(N=501)	0.64	3.7898	TCGA-DU-A76L-01
LGG(N=501)	0.3	2.8076	TCGA-HW-7495-01
LGG(N=501)	0	2.4252	TCGA-CS-6669-01
LGG(N=501)	0.54	3.5299	TCGA-HT-7481-01
LGG(N=501)	0.26	3.1637	TCGA-DU-8163-01
LGG(N=501)	7.14	3.8788	TCGA-HT-8110-01
LGG(N=501)	0.24	3.3675	TCGA-RY-A840-01
LGG(N=501)	0.1	2.5462	TCGA-VM-A8C9-01
LGG(N=501)	0.5	3.3407	TCGA-HW-8319-01
LGG(N=501)	0.74	2.8219	TCGA-QH-A6CW-01
LGG(N=501)	0.22	3.3163	TCGA-DU-5870-01
LGG(N=501)	0.28	3.2267	TCGA-TM-A84S-01
LGG(N=501)	0.48	3.0376	TCGA-RY-A845-01
LGG(N=501)	0.48	3.0199	TCGA-FG-8182-01
LGG(N=501)	1.06	3.1062	TCGA-FG-6688-01
LGG(N=501)	0.8	3.3278	TCGA-TQ-A7RP-01
LGG(N=501)	0.36	2.3953	TCGA-HT-8113-01
LGG(N=501)	0.74	2.8381	TCGA-HT-7689-01
LGG(N=501)	0.28	2.6895	TCGA-FG-7638-01
LGG(N=501)	0.64	4.3385	TCGA-DU-7013-01
LGG(N=501)	0.28	2.828	TCGA-E1-A7Z3-01
LGG(N=501)	0.4	2.6371	TCGA-HT-7476-01
LGG(N=501)	0.48	3.3661	TCGA-TQ-A7RG-01
LGG(N=501)	2.04	3.2677	TCGA-DU-A7T6-01
LGG(N=501)	0.38	3.5682	TCGA-DB-A4XC-01
LGG(N=501)	1.1	3.3619	TCGA-FG-A4MW-01
LGG(N=501)	0.54	3.3321	TCGA-DH-5142-01
LGG(N=501)	0.44	3.1294	TCGA-S9-A6U2-01
LGG(N=501)	0.68	2.824	TCGA-TQ-A7RH-01
LGG(N=501)	0.46	2.108	TCGA-DB-A75M-01
LGG(N=501)	0.4	2.6738	TCGA-HT-8012-01
LGG(N=501)	0.56	2.9167	TCGA-S9-A7QW-01
LGG(N=501)	0.56	1.614	TCGA-P5-A733-01
LGG(N=501)	0.32	2.1213	TCGA-E1-A7Z4-01
LGG(N=501)	0.7	1.6045	TCGA-DU-A5TR-01
LGG(N=501)	0.58	2.2299	TCGA-FG-8185-01
LGG(N=501)	0.46	2.0946	TCGA-HW-8320-01
LGG(N=501)	0.46	1.5902	TCGA-CS-6667-01
LGG(N=501)	0.56	2.5731	TCGA-DU-5849-01
LGG(N=501)	0.7	2.9637	TCGA-DB-5279-01
LGG(N=501)	0.58	3.2112	TCGA-CS-6670-01
LGG(N=501)	0.5	2.5061	TCGA-DB-A64V-01
LGG(N=501)	0.8	3.1426	TCGA-DU-5854-01
LGG(N=501)	1.06	4.2914	TCGA-DH-A7UR-01
LGG(N=501)	0.98	3.2511	TCGA-S9-A6WL-01
LGG(N=501)	0.12	2.2723	TCGA-HT-7880-01
LGG(N=501)	0.68	3.0127	TCGA-E1-5318-01
LGG(N=501)	0.48	4.1587	TCGA-DU-6393-01
LGG(N=501)	0.38	2.96	TCGA-DU-5853-01
LGG(N=501)	0.64	4.4602	TCGA-TM-A84J-01
LGG(N=501)	0.68	3.5237	TCGA-FG-5962-01
LGG(N=501)	0.48	2.93	TCGA-F6-A8O4-01
LGG(N=501)	0.34	2.6441	TCGA-S9-A7R1-01
LGG(N=501)	0.54	3.9608	TCGA-TM-A84M-01
LGG(N=501)	0.02	2.3677	TCGA-HT-8107-01
LGG(N=501)	0.36	3.154	TCGA-P5-A5ET-01
LGG(N=501)	0.72	1.9712	TCGA-P5-A72W-01
LGG(N=501)	0.3	2.8096	TCGA-FG-A70Y-01
LGG(N=501)	0.1	2.9432	TCGA-TM-A84R-01
LGG(N=501)	0.34	2.0465	TCGA-HW-A5KM-01
LGG(N=501)	0.84	4.2533	TCGA-HT-7477-01
LGG(N=501)	1.06	3.6463	TCGA-FG-A87Q-01
LGG(N=501)	1	3.7815	TCGA-FG-A70Z-01
LGG(N=501)	1.02	3.7269	TCGA-FG-A4MU-01
LGG(N=501)	0.5	3.5098	TCGA-DB-A4XB-01
LGG(N=501)	0.64	2.3048	TCGA-WY-A85D-01
LGG(N=501)	0.46	2.9507	TCGA-FG-7641-01
LGG(N=501)	0.48	1.674	TCGA-DU-5872-01
LGG(N=501)	0.36	2.1345	TCGA-FG-6689-01
LGG(N=501)	0.7	2.5238	TCGA-DB-5277-01
LGG(N=501)	0.64	3.1377	TCGA-HT-A615-01
LGG(N=501)	0.5	2.5585	TCGA-DU-7301-01
LGG(N=501)	0.28	2.4465	TCGA-P5-A5EW-01
LGG(N=501)	0.3	2.1702	TCGA-HT-A5RB-01
LGG(N=501)	1.08	2.5288	TCGA-E1-A7YN-01
LGG(N=501)	0.82	3.3278	TCGA-QH-A6XC-01
LGG(N=501)	0.62	3.0199	TCGA-S9-A6WN-01
LGG(N=501)	1.38	2.1766	TCGA-DB-A64L-01
LGG(N=501)	0.6	3.981	TCGA-TM-A84I-01
LGG(N=501)	0.56	3.6018	TCGA-QH-A6CZ-01
LGG(N=501)	0.58	1.5465	TCGA-WY-A858-01
LGG(N=501)	0.44	3.2826	TCGA-VM-A8CB-01
LGG(N=501)	0.64	1.4704	TCGA-VM-A8CF-01
LGG(N=501)	0.36	2.9875	TCGA-HT-7608-01
LGG(N=501)	0.28	2.828	TCGA-CS-4938-01
LGG(N=501)	0.48	2.4571	TCGA-QH-A6X5-01
LGG(N=501)	0.48	2.5972	TCGA-DU-8166-01
LGG(N=501)	0.36	2.9262	TCGA-HT-8018-01
LGG(N=501)	0.7	3.3435	TCGA-DU-7292-01
LGG(N=501)	0.28	1.4494	TCGA-S9-A6TU-01
LGG(N=501)	0.06	1.9895	TCGA-DB-A75P-01
LGG(N=501)	0.22	3.4556	TCGA-FG-6691-01
LGG(N=501)	0.84	3.2988	TCGA-DU-6399-01
LGG(N=501)	0.3	2.694	TCGA-S9-A7IQ-01
LGG(N=501)	0.4	2.1862	TCGA-S9-A6WI-01
LGG(N=501)	0.18	2.2783	TCGA-DB-A64S-01
LGG(N=501)	1.2	3.5994	TCGA-FG-6692-01
LGG(N=501)	0.34	2.6441	TCGA-HW-7489-01
LGG(N=501)	0.18	3.1572	TCGA-R8-A6YH-01
LGG(N=501)	0.4	2.1541	TCGA-HT-A618-01
LGG(N=501)	0.34	1.8119	TCGA-QH-A65S-01
LGG(N=501)	0.48	2.167	TCGA-DU-7019-01
LGG(N=501)	0.68	4.3263	TCGA-DU-A7TJ-01
LGG(N=501)	0.74	2.4386	TCGA-TM-A84H-01
LGG(N=501)	0.5	2.9893	TCGA-S9-A7R8-01
LGG(N=501)	0.42	2.1213	TCGA-S9-A7R4-01
LGG(N=501)	0.46	3.4556	TCGA-S9-A7J3-01
LGG(N=501)	0.36	2.6348	TCGA-TM-A84L-01
LGG(N=501)	0.44	2.2872	TCGA-E1-A7YH-01
LGG(N=501)	1.46	3.2915	TCGA-P5-A5EV-01
LGG(N=501)	0.68	4.2227	TCGA-DU-A7TD-01
LGG(N=501)	0.4	1.7828	TCGA-HW-A5KL-01
LGG(N=501)	0.26	3.3787	TCGA-RY-A83X-01
LGG(N=501)	0.7	3.492	TCGA-HT-7687-01
LGG(N=501)	0.2	2.6138	TCGA-WY-A85A-01
LGG(N=501)	0.92	2.8158	TCGA-DB-5281-01
LGG(N=501)	0.92	2.1476	TCGA-E1-A7YK-01
LGG(N=501)	0.72	1.9188	TCGA-DU-A5TU-01
LGG(N=501)	0.64	2.59	TCGA-DU-A7TA-01
LGG(N=501)	0.74	3.8095	TCGA-CS-5395-01
LGG(N=501)	0.44	2.2113	TCGA-TQ-A7RR-01
LGG(N=501)	0.44	2.5948	TCGA-HT-A5R5-01
LGG(N=501)	0.42	2.2603	TCGA-QH-A65V-01
LGG(N=501)	0.64	3.5923	TCGA-S9-A6WP-01
LGG(N=501)	0.32	2.7292	TCGA-S9-A6U5-01
LGG(N=501)	0.62	3.3563	TCGA-E1-A7YO-01
LGG(N=501)	0.44	3.6509	TCGA-QH-A6X8-01
LGG(N=501)	0.28	2.9692	TCGA-HT-7610-01
LGG(N=501)	0.54	3.2065	TCGA-HT-7875-01
LGG(N=501)	0.44	2.6783	TCGA-R8-A6MK-01
LGG(N=501)	0.52	2.9525	TCGA-P5-A5F0-01
LGG(N=501)	0.52	2.872	TCGA-R8-A73M-01
LGG(N=501)	1.12	1.9527	TCGA-S9-A6TS-01
LGG(N=501)	0.52	2.3222	TCGA-S9-A6TW-01
LGG(N=501)	0.52	2.7314	TCGA-E1-5303-01
LGG(N=501)	0.46	4.2297	TCGA-HT-7606-01
LGG(N=501)	0.3	3.2018	TCGA-DU-6408-01
LGG(N=501)	0.66	3.1507	TCGA-FG-5964-01
LGG(N=501)	0.36	3.186	TCGA-DB-A64Q-01
LGG(N=501)	0.48	2.8034	TCGA-S9-A7IZ-01
LGG(N=501)	1.22	3.0757	TCGA-S9-A6WH-01
LGG(N=501)	0.24	2.3788	TCGA-HT-7602-01
LGG(N=501)	0.9	3.002	TCGA-DU-A6S8-01
LGG(N=501)	0.34	2.5972	TCGA-HT-7858-01
LGG(N=501)	1.2	3.6916	TCGA-HT-7860-01
LGG(N=501)	1.04	3.6657	TCGA-DU-7006-01
LGG(N=501)	0.3	2.685	TCGA-TQ-A7RS-01
LGG(N=501)	0.34	3.0533	TCGA-DU-7009-01
LGG(N=501)	1.62	3.66	TCGA-DU-7010-01
LGG(N=501)	0.4	2.6783	TCGA-QH-A6X3-01
LGG(N=501)	0.6	3.2781	TCGA-DU-8164-01
LGG(N=501)	0.6	3.5449	TCGA-DU-7018-01
LGG(N=501)	0.3	3.0376	TCGA-RY-A843-01
LGG(N=501)	0.56	2.4412	TCGA-HT-7693-01
LGG(N=501)	1.12	3.2297	TCGA-FG-A6J3-01
LGG(N=501)	0.52	2.5238	TCGA-HT-8106-01
LGG(N=501)	0.28	3.0654	TCGA-HT-7472-01
LGG(N=501)	0.6	1.6649	TCGA-HT-7855-01
LGG(N=501)	0.34	3.6136	TCGA-DB-A4XG-01
LGG(N=501)	0.84	3.6486	TCGA-HT-A5RC-01
LGG(N=501)	0.64	2.3508	TCGA-VM-A8C8-01
LGG(N=501)	0.22	2.4198	TCGA-HT-7681-01
LGG(N=501)	0.28	2.4649	TCGA-DU-A6S2-01
LGG(N=501)	0.6	2.8034	TCGA-DU-7309-01
LGG(N=501)	0.66	2.108	TCGA-DB-A4XH-01
LGG(N=501)	0.26	3.3307	TCGA-HT-7485-01
LGG(N=501)	0.6	2.3077	TCGA-VW-A7QS-01
LGG(N=501)	0.22	2.2753	TCGA-VV-A86M-01
LGG(N=501)	0.68	4.6212	TCGA-E1-A7YV-01
LGG(N=501)	0.26	3.5706	TCGA-HT-7468-01
LGG(N=501)	0.64	3.5237	TCGA-HT-7677-01
LGG(N=501)	0.82	2.5388	TCGA-DU-A5TY-01
LGG(N=501)	0.62	2.8622	TCGA-HT-8109-01
LGG(N=501)	0.46	2.118	TCGA-HT-7479-01
LGG(N=501)	0.7	3.0825	TCGA-DB-5275-01
LGG(N=501)	0.62	2.578	TCGA-TM-A7C4-01
LGG(N=501)	0.76	3.5875	TCGA-DH-A7UU-01
LGG(N=501)	0.28	2.3788	TCGA-HT-A4DV-01
LGG(N=501)	0.48	2.9128	TCGA-FG-8186-01
LGG(N=501)	0.28	3.186	TCGA-FG-A4MT-01
LGG(N=501)	0.5	3.3221	TCGA-E1-5305-01
LGG(N=501)	0.38	2.4306	TCGA-CS-5393-01
LGG(N=501)	0.36	2.6371	TCGA-DU-6395-01
LGG(N=501)	1.12	1.6187	TCGA-DB-A64X-01
LGG(N=501)	0.88	4.7367	TCGA-S9-A7IS-01
LGG(N=501)	4.28	3.0163	TCGA-HT-7856-01
LGG(N=501)	0.18	2.5437	TCGA-QH-A6XA-01
LGG(N=501)	0.44	2.2144	TCGA-P5-A77W-01
LGG(N=501)	0.42	3.2959	TCGA-CS-4942-01
LGG(N=501)	0.9	3.4411	TCGA-CS-6186-01
LGG(N=501)	0.48	3.4358	TCGA-DU-7008-01
LGG(N=501)	1.24	2.8701	TCGA-HT-7688-01
LGG(N=501)	0.3	2.9205	TCGA-DU-A7T8-01
LGG(N=501)	0.5	2.2663	TCGA-DU-A6S3-01
LGG(N=501)	0.18	2.7117	TCGA-DB-A64U-01
LGG(N=501)	0.74	5.0756	TCGA-HT-A61C-01
LGG(N=501)	0.36	2.876	TCGA-TQ-A7RF-01
LGG(N=501)	0.38	3.4752	TCGA-F6-A8O3-01
LGG(N=501)	0.38	3.1829	TCGA-R8-A6ML-01
LGG(N=501)	0.84	2.8219	TCGA-DU-A5TT-01
LGG(N=501)	0.34	2.6962	TCGA-QH-A870-01
LGG(N=501)	0.32	2.376	TCGA-DB-A75O-01
LGG(N=501)	0.24	3.034	TCGA-HT-8111-01
LGG(N=501)	1.02	3.1491	TCGA-S9-A7QZ-01
LGG(N=501)	0.28	2.7636	TCGA-DB-5273-01
LGG(N=501)	0.72	2.8381	TCGA-HT-7470-01
LGG(N=501)	0.58	2.4386	TCGA-FG-A4MY-01
LGG(N=501)	0.28	2.7401	TCGA-HT-8108-01
LGG(N=501)	0.44	3.741	TCGA-DB-A4XE-01
LGG(N=501)	0.6	4.1359	TCGA-HT-A4DS-01
LGG(N=501)	0.62	3.208	TCGA-DU-8158-01
LGG(N=501)	0.32	2.4386	TCGA-HT-7474-01
LGG(N=501)	0.52	2.9338	TCGA-DH-5143-01
LGG(N=501)	0.68	2.6418	TCGA-TQ-A7RJ-01
LGG(N=501)	0.66	2.0979	TCGA-S9-A7QY-01
LGG(N=501)	0.22	2.7993	TCGA-DB-A4XA-01
LGG(N=501)	0.42	2.3423	TCGA-P5-A731-01
LGG(N=501)	1.12	3.3633	TCGA-E1-A7YE-01
LGG(N=501)	0.56	3.0893	TCGA-FG-A710-01
LGG(N=501)	0.22	2.7636	TCGA-HT-8010-01
LGG(N=501)	0.4	2.7572	TCGA-DU-7299-01
LGG(N=501)	0.34	2.5683	TCGA-DB-5270-01
LGG(N=501)	0.16	3.4907	TCGA-KT-A74X-01
LGG(N=501)	0.6	2.7379	TCGA-DB-A75L-01
LGG(N=501)	0.34	2.2237	TCGA-HT-A616-01
LGG(N=501)	0.56	2.5288	TCGA-HT-A74K-01
LGG(N=501)	0.56	2.0776	TCGA-WY-A85C-01
LGG(N=501)	0.46	2.6348	TCGA-FG-8188-01
LGG(N=501)	0.44	2.8877	TCGA-DU-A6S7-01
LGG(N=501)	0.34	3.1245	TCGA-DU-7294-01
LGG(N=501)	0.66	2.7444	TCGA-DB-5274-01
LGG(N=501)	0.72	3.2359	TCGA-HT-7604-01
LGG(N=501)	0.36	3.0859	TCGA-TM-A84F-01
LGG(N=501)	0.34	2.5338	TCGA-DB-A64O-01
LGG(N=501)	0.62	2.982	TCGA-HT-7884-01
LGG(N=501)	0.18	2.7336	TCGA-S9-A6WE-01
LGG(N=501)	0.3	2.6647	TCGA-QH-A6CY-01
LGG(N=501)	1.06	3.8411	TCGA-S9-A6WM-01
LGG(N=501)	0.72	4.1628	TCGA-HT-A5RA-01
LGG(N=501)	0.82	3.6703	TCGA-QH-A6CV-01
LGG(N=501)	0.2	2.6805	TCGA-VM-A8CE-01
LGG(N=501)	1.18	3.5362	TCGA-DU-5852-01
LGG(N=501)	0.94	2.5536	TCGA-P5-A72U-01
LGG(N=501)	0.58	2.7508	TCGA-DB-A75K-01
LGG(N=501)	0.66	3.5959	TCGA-DU-6410-01
LGG(N=501)	0.56	2.6873	TCGA-QH-A65Z-01
LGG(N=501)	0.52	2.6693	TCGA-S9-A7IY-01
LGG(N=501)	0.26	2.6602	TCGA-P5-A781-01
LGG(N=501)	0.52	4.1027	TCGA-TM-A84G-01
LGG(N=501)	0.68	2.8582	TCGA-HW-A5KK-01
LGG(N=501)	0.3	3.1523	TCGA-E1-5311-01
LGG(N=501)	0.3	3.7688	TCGA-FG-7634-01
LGG(N=501)	0.7	2.0844	TCGA-DU-5855-01
LGG(N=501)	0.66	2.1702	TCGA-DU-6396-01
LGG(N=501)	0.82	2.8916	TCGA-FG-7643-01
LGG(N=501)	0.28	2.6043	TCGA-TM-A84C-01
LGG(N=501)	1.04	2.7889	TCGA-WY-A85E-01
LGG(N=501)	0.62	3.8876	TCGA-DU-7298-01
LGG(N=501)	0.42	2.05	TCGA-TM-A84T-01
LGG(N=501)	0.52	2.9413	TCGA-FG-7637-01
LGG(N=501)	0.56	3.4945	TCGA-HT-A5R9-01
LGG(N=501)	0.56	2.5536	TCGA-HT-A614-01
LGG(N=501)	0.56	3.0706	TCGA-QH-A65R-01
LGG(N=501)	0.66	3.0961	TCGA-FG-A60J-01
LGG(N=501)	0.08	2.8858	TCGA-FG-8189-01
LGG(N=501)	0.04	2.6371	TCGA-P5-A5EY-01
LGG(N=501)	0.76	2.5238	TCGA-HT-7882-01
LGG(N=501)	0.92	4.6502	TCGA-HT-8011-01
LGG(N=501)	0.5	3.5559	TCGA-DU-6394-01
LGG(N=501)	0.5	3.1112	TCGA-WY-A859-01
LGG(N=501)	0.22	2.7572	TCGA-WY-A85B-01
LGG(N=501)	0.42	3.5449	TCGA-S9-A6UB-01
LGG(N=501)	0.6	3.3717	TCGA-S9-A6U6-01
LGG(N=501)	0.82	4.4344	TCGA-DU-8168-01
LGG(N=501)	0.6	3.0481	TCGA-DU-7290-01
LGG(N=501)	0.36	3.5387	TCGA-DU-6407-01
LGG(N=501)	0.38	3.0463	TCGA-HT-7601-01
LGG(N=501)	0.98	4.6804	TCGA-DU-6403-01
LGG(N=501)	0.28	2.7679	TCGA-DB-A64R-01
LGG(N=501)	0.58	3.1924	TCGA-E1-A7YQ-01
LGG(N=501)	0.94	4.1103	TCGA-DU-6405-01
LGG(N=501)	0.3	2.4225	TCGA-HW-7487-01
LGG(N=501)	0.68	2.4701	TCGA-S9-A7R2-01
LGG(N=501)	0.38	3.1011	TCGA-S9-A7J1-01
LGG(N=501)	0.18	2.2663	TCGA-P5-A72X-01
LGG(N=501)	0.62	3.4596	TCGA-E1-A7YJ-01
LGG(N=501)	0.42	2.7993	TCGA-HT-7690-01
LGG(N=501)	0.64	2.7993	TCGA-HT-8105-01
LGG(N=501)	0.14	3.034	TCGA-E1-A7YY-01
LGG(N=501)	0.88	3.1311	TCGA-HT-A619-01
LGG(N=501)	0.8	3.1844	TCGA-DU-6400-01
LGG(N=501)	0.36	2.9948	TCGA-P5-A737-01
LGG(N=501)	0.64	3.0428	TCGA-RY-A83Y-01
LGG(N=501)	8.14	3.055	TCGA-HT-8564-01
LGG(N=501)	0.32	2.3871	TCGA-HT-7686-01
LGG(N=501)	0.68	3.3492	TCGA-E1-A7YM-01
LGG(N=501)	0.32	2.4252	TCGA-DH-A66F-01
LGG(N=501)	0.74	3.3911	TCGA-CS-5390-01
LGG(N=501)	0.68	3.5324	TCGA-S9-A6UA-01
LGG(N=501)	0.46	4.5547	TCGA-FG-A87N-01
LGG(N=501)	0.58	3.0533	TCGA-VV-A829-01
LGG(N=501)	0.74	2.8381	TCGA-DH-A66B-01
LGG(N=501)	0.44	2.9655	TCGA-HT-A5R7-01
LGG(N=501)	0.46	3.6405	TCGA-CS-5394-01
LGG(N=501)	0.8	2.8562	TCGA-DH-A66D-01
LGG(N=501)	0.26	3.154	TCGA-HT-7877-01
LGG(N=501)	0.44	3.1228	TCGA-DU-6542-01
LGG(N=501)	0.32	2.3048	TCGA-QH-A6CS-01
LGG(N=501)	0.42	3.5174	TCGA-E1-A7YU-01
LGG(N=501)	0.46	2.8321	TCGA-W9-A837-01
LGG(N=501)	0.72	3.0181	TCGA-IK-7675-01
LGG(N=501)	1	2.5263	TCGA-DU-7306-01
LGG(N=501)	0.8	2.9784	TCGA-QH-A6X9-01
LGG(N=501)	0.66	3.4556	TCGA-S9-A6U0-01
LGG(N=501)	0.52	2.7636	TCGA-HT-7611-01
LGG(N=501)	0.34	3.0791	TCGA-S9-A6TY-01
LGG(N=501)	0.58	2.6161	TCGA-DU-A7TB-01
LGG(N=501)	0.9	3.0774	TCGA-IK-8125-01
LGG(N=501)	0.68	1.4547	TCGA-WH-A86K-01
LGG(N=501)	0.42	2.0218	TCGA-DH-5141-01
LGG(N=501)	0.44	2.5163	TCGA-FG-A60L-01
LGG(N=501)	0.36	2.5288	TCGA-DB-5280-01
LGG(N=501)	0.52	3.7149	TCGA-S9-A7IX-01
LGG(N=501)	0.7	3.0498	TCGA-FG-5965-01
LGG(N=501)	0.02	2.1378	TCGA-P5-A5F6-01
LGG(N=501)	0.66	2.5036	TCGA-DU-7007-01
LGG(N=501)	0.68	1.2271	TCGA-HW-7490-01
LGG(N=501)	0.6	4.1111	TCGA-CS-6188-01
LGG(N=501)	0.34	3.9938	TCGA-CS-6668-01
LGG(N=501)	1.16	4.0722	TCGA-DU-8165-01
LGG(N=501)	0.4	2.4386	TCGA-HT-7692-01
LGG(N=501)	1.2	5.3862	TCGA-TQ-A7RM-01
LGG(N=501)	0.7	3.6972	TCGA-DU-8161-01
LGG(N=501)	0.56	1.6512	TCGA-P5-A736-01
LGG(N=501)	0.42	1.0847	TCGA-DU-6401-01
LGG(N=501)	0.86	2.1606	TCGA-HT-A74H-01
LGG(N=501)	0.4	2.6138	TCGA-TQ-A7RV-01
LGG(N=501)	0.22	2.982	TCGA-HT-7483-01
LGG(N=501)	0.3	2.7139	TCGA-HT-7620-01
LGG(N=501)	0.44	2.8622	TCGA-HT-7480-01
LGG(N=501)	0.74	4.9426	TCGA-S9-A7J0-01
LGG(N=501)	0.5	2.945	TCGA-TM-A84Q-01
LGG(N=501)	0.28	2.7051	TCGA-RY-A847-01
LGG(N=501)	0.44	3.4971	TCGA-TQ-A7RQ-01
LGG(N=501)	0.7	3.0074	TCGA-TQ-A7RW-01
LGG(N=501)	0.36	2.4412	TCGA-FG-8191-01
LGG(N=501)	0.34	2.9692	TCGA-E1-A7YW-01
LGG(N=501)	0.12	2.8482	TCGA-DB-5278-01
LGG(N=501)	0.96	3.7094	TCGA-E1-A7YS-01
LGG(N=501)	0.26	3.1045	TCGA-HT-7695-01
LGG(N=501)	0.9	3.2267	TCGA-DU-7012-01
LGG(N=501)	0.26	2.909	TCGA-HT-7879-01
LGG(N=501)	0.42	2.6278	TCGA-DU-A7TC-01
LGG(N=501)	0.02	2.685	TCGA-HT-7680-01
LGG(N=501)	0.44	3.4622	TCGA-DB-A4X9-01
LGG(N=501)	0.54	3.011	TCGA-TQ-A7RI-01
LGG(N=501)	0.62	2.9243	TCGA-TM-A7CA-01
LGG(N=501)	0.36	3.1604	TCGA-QH-A86X-01
LGG(N=501)	0.72	3.3076	TCGA-DU-A76R-01
LGG(N=501)	0.58	3.0671	TCGA-DH-5144-01
LGG(N=501)	0.54	3.7335	TCGA-E1-A7Z2-01
LGG(N=501)	0.54	2.5288	TCGA-DU-A5TP-01
LGG(N=501)	0.26	2.5112	TCGA-FG-8187-01
LGG(N=501)	0.6	5.1351	TCGA-E1-5304-01
LGG(N=501)	0.42	4.2803	TCGA-CS-4943-01
LGG(N=501)	0.4	4.5596	TCGA-DH-5140-01
LGG(N=501)	0.66	1.9452	TCGA-TM-A7CF-01
LGG(N=501)	0.6	3.0842	TCGA-DH-A7US-01
LGG(N=501)	0.66	3.0074	TCGA-HT-A61B-01
LGG(N=501)	0.3	2.5388	TCGA-E1-A7Z6-01
LGG(N=501)	0.26	2.4063	TCGA-HT-7857-01
LGG(N=501)	0.66	2.8055	TCGA-E1-5319-01
LGG(N=501)	0.66	1.3956	TCGA-DU-A5TS-01
LGG(N=501)	192.7	3.3563	TCGA-DU-6392-01
LGG(N=501)	0.3	1.7273	TCGA-QH-A6CU-01
LGG(N=501)	0.2	3.2251	TCGA-DU-6404-01
LGG(N=501)	0.8	3.4477	TCGA-VW-A8FI-01
LGG(N=501)	0.24	3.3278	TCGA-HT-A74L-01
LGG(N=501)	0.44	4.2434	TCGA-P5-A5EU-01
LGG(N=501)	0.68	2.1247	TCGA-P5-A5EZ-01
LGG(N=501)	1.12	3.2267	TCGA-S9-A89Z-01
LGG(N=501)	0.48	2.6019	TCGA-S9-A6TZ-01
LGG(N=501)	0.54	3.6635	TCGA-FG-5963-01
LGG(N=501)	0.14	2.4063	TCGA-HT-A61A-01
LGG(N=501)	0.78	2.0912	TCGA-S9-A89V-01
LGG(N=501)	0.72	4.3456	TCGA-DB-A64W-01
LGG(N=501)	0.46	1.5115	TCGA-FG-A4MX-01
LGG(N=501)	0.5	3.3703	TCGA-P5-A72Z-01
LGG(N=501)	0.36	2.3843	TCGA-HT-8114-01
LGG(N=501)	0.18	2.5561	TCGA-HT-7881-01
LGG(N=501)	0.36	1.8201	TCGA-CS-4944-01
LGG(N=501)	0.46	2.4727	TCGA-S9-A7QX-01
LGG(N=501)	0.2	2.5087	TCGA-DU-A7TG-01
LGG(N=501)	0.7	4.0118	TCGA-DU-5874-01
LGG(N=501)	0.66	2.8994	TCGA-TQ-A8XE-01
LGG(N=501)	0.82	2.9674	TCGA-DU-7300-01
LGG(N=501)	0.62	2.9356	TCGA-HT-7694-01
LGG(N=501)	0.24	4.0748	TCGA-HT-7471-01
LGG(N=501)	0.58	2.9469	TCGA-DB-A4XD-01
LGG(N=501)	0.44	3.0688	TCGA-TQ-A7RK-01
LGG(N=501)	0.86	2.6371	TCGA-HT-7475-01
LGG(N=501)	0.3	3.7614	TCGA-TQ-A7RO-01
LGG(N=501)	0.48	2.7292	TCGA-HT-7902-01
LGG(N=501)	0.66	2.9911	TCGA-FG-A711-01
LGG(N=501)	0.28	2.5948	TCGA-DB-5276-01
LGG(N=501)	0.42	2.3394	TCGA-P5-A730-01
LGG(N=501)	0.92	4.2736	TCGA-E1-A7YD-01
LGG(N=501)	0.38	2.1574	TCGA-HT-A74O-01
LGG(N=501)	0.04	3.1045	TCGA-HT-8015-01
LGG(N=501)	0.42	2.5487	TCGA-HT-A74J-01
LGG(N=501)	0.98	4.1036	TCGA-DH-A669-01
LGG(N=501)	0.34	2.6715	TCGA-HT-A617-01
LGG(N=501)	0.5	2.7073	TCGA-HT-7605-01
LGG(N=501)	0.54	2.7805	TCGA-S9-A6WO-01
LGG(N=501)	0.58	2.7183	TCGA-QH-A6CX-01
LGG(N=501)	0.58	2.6255	TCGA-P5-A5F4-01
LGG(N=501)	0.88	3.2174	TCGA-DU-A76K-01
LGG(N=501)	0.12	2.2931	TCGA-VM-A8CH-01
LGG(N=501)	0.44	2.004	TCGA-HT-7609-01
LGG(N=501)	0.38	3.2915	TCGA-QH-A6X4-01
LGG(N=501)	0.56	2.036	TCGA-DH-A7UV-01
LGG(N=501)	1.12	2.93	TCGA-TM-A7C3-01
LGG(N=501)	0.32	3.5645	TCGA-S9-A6WG-01
LGG(N=501)	0.54	3.1442	TCGA-FG-6690-01
LGG(N=501)	0.9	2.4386	TCGA-DU-8167-01
LGG(N=501)	0.46	2.7657	TCGA-QH-A65X-01
LGG(N=501)	0.7	1.7617	TCGA-P5-A780-01
LGG(N=501)	0.56	3.417	TCGA-E1-5302-01
LGG(N=501)	0.62	1.7009	TCGA-HW-A5KJ-01
LGG(N=501)	0.58	2.9356	TCGA-R8-A6MO-01
LGG(N=501)	0.74	2.5511	TCGA-FG-7636-01
LGG(N=501)	0.34	2.1147	TCGA-CS-6290-01
LGG(N=501)	0.66	3.9327	TCGA-DU-5847-01
LGG(N=501)	0.14	4.6514	TCGA-DU-6406-01
LGG(N=501)	0.5	3.7028	TCGA-TM-A84B-01
CESC(N=286)	0.36	3.091	TCGA-EK-A2RE-01
CESC(N=286)	0.52	3.6486	TCGA-IR-A3L7-01
CESC(N=286)	1.06	4.2312	TCGA-Q1-A73Q-01
CESC(N=286)	1.68	2.5924	TCGA-C5-A1MF-01
CESC(N=286)	0.66	3.2632	TCGA-EX-A3L1-01
CESC(N=286)	1.36	4.0515	TCGA-JW-A5VI-01
CESC(N=286)	1.3	4.1027	TCGA-EA-A1QT-01
CESC(N=286)	4.54	2.3898	TCGA-UC-A7PG-01
CESC(N=286)	1.92	3.4358	TCGA-EA-A97N-01
CESC(N=286)	1.74	3.1228	TCGA-EA-A3QD-01
CESC(N=286)	1.08	3.0757	TCGA-C5-A1ME-01
CESC(N=286)	1.82	4.0867	TCGA-C5-A8YR-01
CESC(N=286)	3.72	2.826	TCGA-FU-A40J-01
CESC(N=286)	2.26	4.4608	TCGA-VS-A9V5-01
CESC(N=286)	2.78	4.1587	TCGA-MY-A913-01
CESC(N=286)	0.82	3.4661	TCGA-VS-A8Q9-01
CESC(N=286)	1.24	3.6861	TCGA-DS-A0VL-01
CESC(N=286)	1.14	2.6895	TCGA-VS-A9UU-01
CESC(N=286)	0.92	2.7444	TCGA-ZJ-AAXN-01
CESC(N=286)	7.64	4.0782	TCGA-VS-A9U6-01
CESC(N=286)	3.48	3.5035	TCGA-C5-A2LX-01
CESC(N=286)	1.2	3.3535	TCGA-C5-A1M8-01
CESC(N=286)	1.12	3.1245	TCGA-C5-A7CJ-01
CESC(N=286)	1.24	3.7961	TCGA-GH-A9DA-01
CESC(N=286)	0.98	3.5473	TCGA-EA-A5O9-01
CESC(N=286)	4.22	2.9747	TCGA-Q1-A73P-01
CESC(N=286)	3.4	3.9901	TCGA-C5-A8XK-01
CESC(N=286)	0.96	3.5098	TCGA-C5-A907-01
CESC(N=286)	2.9	3.9346	TCGA-VS-A9UD-01
CESC(N=286)	0.26	2.7847	TCGA-C5-A7CM-01
CESC(N=286)	0.78	3.5633	TCGA-VS-A9V2-01
CESC(N=286)	0.74	3.9636	TCGA-VS-A94Y-01
CESC(N=286)	1.62	3.6759	TCGA-C5-A8ZZ-01
CESC(N=286)	6.54	3.8621	TCGA-VS-A9UJ-01
CESC(N=286)	1.1	2.651	TCGA-ZJ-AAXI-01
CESC(N=286)	2.96	4.0019	TCGA-Q1-A6DT-01
CESC(N=286)	0.42	3.868	TCGA-VS-A9UQ-01
CESC(N=286)	0.64	3.7815	TCGA-VS-A8EG-01
CESC(N=286)	1.02	3.0859	TCGA-EX-A69L-01
CESC(N=286)	23.66	3.1523	TCGA-Q1-A73O-01
CESC(N=286)	2.5	3.154	TCGA-VS-A8QC-01
CESC(N=286)	0.96	2.6019	TCGA-EA-A5ZE-01
CESC(N=286)	1.26	4.6826	TCGA-ZJ-A8QO-01
CESC(N=286)	0.9	3.3134	TCGA-JX-A5QV-01
CESC(N=286)	1.28	3.3591	TCGA-EK-A2GZ-01
CESC(N=286)	0.96	3.4622	TCGA-EK-A2R9-01
CESC(N=286)	6.66	2.9839	TCGA-IR-A3LL-01
CESC(N=286)	1.2	3.3336	TCGA-C5-A1M5-01
CESC(N=286)	0.98	2.8462	TCGA-C5-A7X8-01
CESC(N=286)	12.84	3.3856	TCGA-EA-A3HS-01
CESC(N=286)	13.36	2.7931	TCGA-IR-A3LH-01
CESC(N=286)	0.86	4.0091	TCGA-C5-A1M9-01
CESC(N=286)	1.42	2.9729	TCGA-DG-A2KJ-01
CESC(N=286)	1.12	3.9147	TCGA-Q1-A5R3-01
CESC(N=286)	1.4	3.644	TCGA-HG-A2PA-01
CESC(N=286)	2.9	4.1441	TCGA-VS-A9V3-01
CESC(N=286)	3.44	3.4129	TCGA-VS-A9UH-01
CESC(N=286)	0.96	2.6693	TCGA-JX-A3PZ-01
CESC(N=286)	0.8	2.7051	TCGA-C5-A1MP-01
CESC(N=286)	1.04	2.872	TCGA-MU-A5YI-01
CESC(N=286)	2.92	4.3834	TCGA-VS-A8QA-01
CESC(N=286)	1.68	2.8779	TCGA-FU-A5XV-01
CESC(N=286)	0.8	2.6418	TCGA-EX-A8YF-01
CESC(N=286)	2.22	3.4371	TCGA-ZJ-A8QR-01
CESC(N=286)	0.96	2.6278	TCGA-IR-A3LB-01
CESC(N=286)	1.5	3.6207	TCGA-EK-A2PI-01
CESC(N=286)	0.92	3.0217	TCGA-HM-A6W2-01
CESC(N=286)	2	3.4843	TCGA-IR-A3LF-01
CESC(N=286)	2	2.9488	TCGA-VS-A8QF-01
CESC(N=286)	1.64	3.287	TCGA-VS-AA62-01
CESC(N=286)	3	4.01	TCGA-C5-A7UE-01
CESC(N=286)	1.7	2.5238	TCGA-DS-A5RQ-01
CESC(N=286)	1.22	3.4398	TCGA-BI-A20A-01
CESC(N=286)	18.68	4.0601	TCGA-EA-A3HU-01
CESC(N=286)	1.48	3.8749	TCGA-EK-A2RM-01
CESC(N=286)	5.66	3.6428	TCGA-DG-A2KK-01
CESC(N=286)	0.96	4.3492	TCGA-C5-A1MI-01
CESC(N=286)	1.7	3.7237	TCGA-JW-A852-01
CESC(N=286)	3.72	3.0376	TCGA-EK-A2RA-01
CESC(N=286)	1.94	3.4804	TCGA-EK-A2RB-01
CESC(N=286)	1.58	3.6771	TCGA-C5-A1MJ-01
CESC(N=286)	1.28	3.4384	TCGA-C5-A1BE-01
CESC(N=286)	2.74	4.3965	TCGA-ZJ-AAXT-01
CESC(N=286)	2.82	3.8471	TCGA-LP-A7HU-01
CESC(N=286)	196.12	3.7919	TCGA-2W-A8YY-01
CESC(N=286)	1.08	3.8451	TCGA-EA-A411-01
CESC(N=286)	2.68	4.1277	TCGA-C5-A1MN-01
CESC(N=286)	1.12	4.3378	TCGA-C5-A2M2-01
CESC(N=286)	0.44	2.9375	TCGA-EK-A2PK-01
CESC(N=286)	27.84	4.4344	TCGA-EA-A410-01
CESC(N=286)	2.02	4.5361	TCGA-VS-A952-01
CESC(N=286)	2.16	3.0428	TCGA-EK-A2IP-01
CESC(N=286)	9.44	3.4371	TCGA-EK-A2PG-01
CESC(N=286)	1.4	3.3717	TCGA-FU-A3YQ-01
CESC(N=286)	23.8	3.2343	TCGA-DS-A1OB-01
CESC(N=286)	4.38	3.6827	TCGA-VS-A959-01
CESC(N=286)	2.4	2.5707	TCGA-EK-A2R7-01
CESC(N=286)	3.76	3.838	TCGA-JW-A5VJ-01
CESC(N=286)	3.96	4.3082	TCGA-C5-A7UH-01
CESC(N=286)	2.92	4.4236	TCGA-MA-AA3Z-01
CESC(N=286)	1.74	3.6894	TCGA-VS-A9UR-01
CESC(N=286)	1	2.8877	TCGA-EK-A3GN-01
CESC(N=286)	0.68	3.0305	TCGA-DS-A3LQ-01
CESC(N=286)	6.48	2.9186	TCGA-ZJ-AAXU-01
CESC(N=286)	2	4.0028	TCGA-VS-A9UY-01
CESC(N=286)	1.08	3.4739	TCGA-ZJ-AAXA-01
CESC(N=286)	2.4	3.5523	TCGA-EK-A2RO-01
CESC(N=286)	5.04	3.5035	TCGA-DS-A0VM-01
CESC(N=286)	0.78	3.9901	TCGA-EX-A1H5-01
CESC(N=286)	0.92	2.8955	TCGA-FU-A3EO-01
CESC(N=286)	4	3.3773	TCGA-EK-A2RK-01
CESC(N=286)	3.84	3.3773	TCGA-C5-A1BL-01
CESC(N=286)	0.38	3.863	TCGA-Q1-A73S-01
CESC(N=286)	2.42	2.872	TCGA-PN-A8MA-01
CESC(N=286)	0.82	3.9496	TCGA-DS-A7WF-01
CESC(N=286)	1.3	3.4596	TCGA-C5-A7X3-01
CESC(N=286)	0.98	2.7551	TCGA-HM-A3JK-01
CESC(N=286)	1.6	2.2901	TCGA-ZJ-AAXJ-01
CESC(N=286)	2.66	3.6657	TCGA-VS-A9V1-01
CESC(N=286)	37.44	3.7992	TCGA-FU-A3HZ-01
CESC(N=286)	1.06	2.96	TCGA-EA-A78R-01
CESC(N=286)	0.7	3.9403	TCGA-JW-A5VG-01
CESC(N=286)	1.42	4.1523	TCGA-VS-A9UV-01
CESC(N=286)	0.08	3.7204	TCGA-C5-A8YT-01
CESC(N=286)	1.02	2.8502	TCGA-ZX-AA5X-01
CESC(N=286)	13.28	3.5473	TCGA-VS-A958-01
CESC(N=286)	5.64	3.3134	TCGA-VS-A8EL-01
CESC(N=286)	1.86	3.7992	TCGA-ZJ-AB0I-01
CESC(N=286)	1.78	4.3292	TCGA-VS-A950-01
CESC(N=286)	22.44	3.4752	TCGA-IR-A3LK-01
CESC(N=286)	17.38	4.0969	TCGA-DS-A1OC-01
CESC(N=286)	1.22	3.29	TCGA-MA-AA3W-01
CESC(N=286)	2.14	5.3646	TCGA-VS-A9UL-01
CESC(N=286)	0.9	4.2134	TCGA-VS-A9UO-01
CESC(N=286)	4.98	3.7335	TCGA-C5-A8XJ-01
CESC(N=286)	2.08	3.2617	TCGA-C5-A7CL-01
CESC(N=286)	1.88	3.0181	TCGA-FU-A3NI-01
CESC(N=286)	1.78	4.0858	TCGA-EA-A439-01
CESC(N=286)	0.88	4.0567	TCGA-VS-A9V0-01
CESC(N=286)	21.02	3.4264	TCGA-EK-A3GK-01
CESC(N=286)	1.08	3.1228	TCGA-C5-A7CG-01
CESC(N=286)	2	3.2313	TCGA-C5-A1BI-01
CESC(N=286)	1.2	3.3464	TCGA-HM-A3JJ-01
CESC(N=286)	2	3.47	TCGA-C5-A7UI-01
CESC(N=286)	1.48	3.0893	TCGA-ZJ-AAXD-01
CESC(N=286)	5.06	3.6463	TCGA-EK-A2R8-01
CESC(N=286)	3.26	4.4816	TCGA-VS-A9UP-01
CESC(N=286)	1.24	2.6395	TCGA-C5-A1BF-01
CESC(N=286)	0.9	2.5213	TCGA-EX-A69M-01
CESC(N=286)	0.42	3.034	TCGA-EA-A5ZD-01
CESC(N=286)	11.9	3.4384	TCGA-JX-A3Q0-01
CESC(N=286)	2.04	3.7313	TCGA-BI-A0VS-01
CESC(N=286)	2.64	2.8055	TCGA-VS-A8EJ-01
CESC(N=286)	1.2	3.7888	TCGA-DR-A0ZL-01
CESC(N=286)	8.46	4.4443	TCGA-MA-AA41-01
CESC(N=286)	1.58	3.3619	TCGA-EA-A3HQ-01
CESC(N=286)	3.72	2.9109	TCGA-LP-A5U2-01
CESC(N=286)	3.32	4.0841	TCGA-EA-A43B-01
CESC(N=286)	6.12	2.4805	TCGA-IR-A3LI-01
CESC(N=286)	2.26	3.551	TCGA-VS-A8EI-01
CESC(N=286)	2.32	2.4934	TCGA-EA-A3Y4-01
CESC(N=286)	7.02	3.5299	TCGA-UC-A7PF-01
CESC(N=286)	1.86	4.847	TCGA-VS-A9UB-01
CESC(N=286)	1.02	3.5424	TCGA-UC-A7PI-01
CESC(N=286)	2.96	2.8701	TCGA-DG-A2KL-01
CESC(N=286)	1.8	3.335	TCGA-JW-AAVH-01
CESC(N=286)	1.1	3.7888	TCGA-Q1-A5R1-01
CESC(N=286)	3.16	2.8779	TCGA-EK-A2PL-01
CESC(N=286)	1.72	3.9393	TCGA-Q1-A6DW-01
CESC(N=286)	1.68	4.1294	TCGA-C5-A2M1-01
CESC(N=286)	1.84	1.9415	TCGA-R2-A69V-01
CESC(N=286)	1.22	3.5262	TCGA-EA-A5ZF-01
CESC(N=286)	2.9	3.3938	TCGA-FU-A23L-01
CESC(N=286)	7.7	3.6474	TCGA-DS-A1OA-01
CESC(N=286)	0.54	4.1595	TCGA-EK-A2H1-01
CESC(N=286)	0.78	3.287	TCGA-LP-A4AU-01
CESC(N=286)	2.64	3.6184	TCGA-VS-A9U7-01
CESC(N=286)	0.8	3.2766	TCGA-C5-A2LS-01
CESC(N=286)	2.72	3.7453	TCGA-MA-AA3Y-01
CESC(N=286)	3.18	2.6533	TCGA-DG-A2KM-01
CESC(N=286)	0.74	2.9747	TCGA-C5-A3HF-01
CESC(N=286)	0.62	2.824	TCGA-C5-A2LT-01
CESC(N=286)	2.92	2.7615	TCGA-C5-A1BK-01
CESC(N=286)	0.64	4.17	TCGA-UC-A7PD-01
CESC(N=286)	2.86	3.4791	TCGA-VS-A9UZ-01
CESC(N=286)	11.84	3.3731	TCGA-DS-A1OD-01
CESC(N=286)	4.7	4.1986	TCGA-C5-A8XH-01
CESC(N=286)	3.02	3.5098	TCGA-EK-A2RC-01
CESC(N=286)	1.1	2.6873	TCGA-JX-A3Q8-01
CESC(N=286)	33.68	4.623	TCGA-JW-A5VL-01
CESC(N=286)	0.58	2.5061	TCGA-DS-A7WI-01
CESC(N=286)	6.22	3.4304	TCGA-VS-A953-01
CESC(N=286)	1.22	3.7688	TCGA-VS-A957-01
CESC(N=286)	1.36	3.5374	TCGA-JW-A5VH-01
CESC(N=286)	1.18	3.7688	TCGA-EA-A3HR-01
CESC(N=286)	1.08	3.1393	TCGA-EA-A3QE-01
CESC(N=286)	1.76	3.6066	TCGA-WL-A834-01
CESC(N=286)	1.5	2.9507	TCGA-C5-A901-01
CESC(N=286)	0.8	3.0074	TCGA-JW-A69B-01
CESC(N=286)	3.14	3.7603	TCGA-FU-A3HY-01
CESC(N=286)	2.48	4.1219	TCGA-C5-A1M6-01
CESC(N=286)	2.04	3.4635	TCGA-VS-A9V4-01
CESC(N=286)	1.36	2.3019	TCGA-VS-A8Q8-01
CESC(N=286)	2.34	2.9186	TCGA-DS-A0VN-01
CESC(N=286)	1.56	3.8147	TCGA-MU-A8JM-01
CESC(N=286)	1.64	3.7982	TCGA-C5-A2LY-01
CESC(N=286)	1.76	3.8788	TCGA-FU-A23K-01
CESC(N=286)	1.1	3.2781	TCGA-EA-A6QX-01
CESC(N=286)	1.12	3.4264	TCGA-C5-A7CH-01
CESC(N=286)	2.82	0.6425	TCGA-EK-A2RN-01
CESC(N=286)	6.72	3.2781	TCGA-EK-A2RJ-01
CESC(N=286)	2.38	2.4883	TCGA-C5-A1BM-01
CESC(N=286)	0.78	4.7437	TCGA-Q1-A73R-01
CESC(N=286)	1.82	4.6983	TCGA-DS-A7WH-01
CESC(N=286)	0.98	3.8749	TCGA-ZJ-AAX4-01
CESC(N=286)	2.38	4.162	TCGA-C5-A7CK-01
CESC(N=286)	3.68	3.5411	TCGA-VS-A8EK-01
CESC(N=286)	1.08	3.1195	TCGA-EA-A1QS-01
CESC(N=286)	1.32	4.5243	TCGA-FU-A3WB-01
CESC(N=286)	1.06	3.2511	TCGA-FU-A3TQ-01
CESC(N=286)	0.96	2.9966	TCGA-C5-A8XI-01
CESC(N=286)	1.22	4.2274	TCGA-C5-A1BN-01
CESC(N=286)	17.48	3.2328	TCGA-IR-A3LA-01
CESC(N=286)	4.84	4.0558	TCGA-VS-A94X-01
CESC(N=286)	8.84	2.7868	TCGA-MA-AA42-01
CESC(N=286)	2.94	3.0234	TCGA-C5-A8YQ-01
CESC(N=286)	1.92	3.4739	TCGA-ZJ-AB0H-01
CESC(N=286)	3.68	3.7646	TCGA-C5-A7X5-01
CESC(N=286)	1.32	3.5547	TCGA-VS-A9U5-01
CESC(N=286)	1.94	2.667	TCGA-C5-A1M7-01
CESC(N=286)	1.56	3.7432	TCGA-C5-A905-01
CESC(N=286)	7.18	3.4384	TCGA-Q1-A5R2-01
CESC(N=286)	4.04	4.2312	TCGA-EK-A3GJ-01
CESC(N=286)	1.24	3.4674	TCGA-DG-A2KH-01
CESC(N=286)	1.16	3.5124	TCGA-VS-A8EB-01
CESC(N=286)	0.82	4.366	TCGA-LP-A4AX-01
CESC(N=286)	12.98	4.1161	TCGA-VS-A94Z-01
CESC(N=286)	2.54	4.0696	TCGA-ZJ-AAXB-01
CESC(N=286)	0.88	2.0395	TCGA-C5-A1MQ-01
CESC(N=286)	1.64	3.3206	TCGA-EX-A1H6-01
CESC(N=286)	0.96	2.9356	TCGA-ZJ-AAXF-01
CESC(N=286)	1.08	3.1717	TCGA-VS-A9UM-01
CESC(N=286)	1.08	3.0358	TCGA-VS-A8EH-01
CESC(N=286)	1.98	2.6302	TCGA-BI-A0VR-01
CESC(N=286)	1.32	3.5911	TCGA-EA-A5FO-01
CESC(N=286)	20.78	2.2237	TCGA-DR-A0ZM-01
CESC(N=286)	1.26	3.1228	TCGA-MA-AA43-01
CESC(N=286)	1.12	3.8391	TCGA-C5-A7UC-01
CESC(N=286)	1.12	4.0304	TCGA-C5-A7XC-01
CESC(N=286)	2.38	3.242	TCGA-VS-A8QH-01
CESC(N=286)	0.76	3.3105	TCGA-LP-A5U3-01
CESC(N=286)	1.72	3.2267	TCGA-EA-A3HT-01
CESC(N=286)	0.8	4.1867	TCGA-IR-A3LC-01
CESC(N=286)	0.88	3.5523	TCGA-FU-A770-01
CESC(N=286)	2.24	4.4128	TCGA-VS-A8EC-01
CESC(N=286)	2.3	3.3549	TCGA-4J-AA1J-01
CESC(N=286)	7.14	3.652	TCGA-LP-A4AV-01
CESC(N=286)	0.44	3.8601	TCGA-EK-A2RL-01
CESC(N=286)	3.12	3.1604	TCGA-EK-A3GM-01
CESC(N=286)	2.92	3.958	TCGA-VS-A9UC-01
CESC(N=286)	1.44	4.248	TCGA-FU-A2QG-01
CESC(N=286)	5.32	2.828	TCGA-EK-A2PM-01
CESC(N=286)	2.12	3.0859	TCGA-DS-A0VK-01
CESC(N=286)	1.14	3.7389	TCGA-VS-A94W-01
CESC(N=286)	5.48	3.1939	TCGA-C5-A1MK-01
CESC(N=286)	8.34	3.4726	TCGA-C5-A1MH-01
CESC(N=286)	0.46	3.8187	TCGA-C5-A0TN-01
CESC(N=286)	2.32	3.3177	TCGA-VS-A9UI-01
CESC(N=286)	1.08	3.772	TCGA-FU-A3TX-01
CESC(N=286)	0.6	3.8511	TCGA-Q1-A6DV-01
CESC(N=286)	1.32	3.5535	TCGA-C5-A1ML-01
CESC(N=286)	1.62	2.7444	TCGA-VS-A8QM-01
CESC(N=286)	0.68	2.2513	TCGA-RA-A741-01
CESC(N=286)	1.28	2.5852	TCGA-VS-A954-01
CESC(N=286)	1.7	2.6278	TCGA-XS-A8TJ-01
CESC(N=286)	1.88	3.4156	TCGA-LP-A4AW-01
CESC(N=286)	0.88	3.3148	TCGA-JW-A5VK-01
CESC(N=286)	3.04	2.8301	TCGA-EK-A2H0-01
CESC(N=286)	0.54	4.0313	TCGA-EX-A449-01
CESC(N=286)	4.66	2.5731	TCGA-C5-A902-01
CESC(N=286)	1.02	3.2796	TCGA-MA-AA3X-01
CESC(N=286)	2.02	3.3661	TCGA-C5-A7CO-01
CESC(N=286)	1.14	3.4437	TCGA-C5-A2LV-01
CESC(N=286)	0.52	3.325	TCGA-VS-A9UT-01
CESC(N=286)	1.26	2.9984	TCGA-ZJ-AAX8-01
CESC(N=286)	2.66	3.4437	TCGA-C5-A1BJ-01
LUAD(N=509)	6.56	2.9911	TCGA-44-6778-01
LUAD(N=509)	4.66	3.1079	TCGA-05-4420-01
LUAD(N=509)	8.96	2.9674	TCGA-64-1679-01
LUAD(N=509)	3.68	1.8404	TCGA-49-6744-01
LUAD(N=509)	3.38	3.0859	TCGA-55-6982-01
LUAD(N=509)	7.54	1.2333	TCGA-NJ-A4YI-01
LUAD(N=509)	5.94	3.6894	TCGA-73-4666-01
LUAD(N=509)	7.7	3.0585	TCGA-MN-A4N1-01
LUAD(N=509)	3.96	3.1669	TCGA-55-7911-01
LUAD(N=509)	13.62	1.3109	TCGA-55-A4DG-01
LUAD(N=509)	4.96	2.7205	TCGA-L9-A5IP-01
LUAD(N=509)	3.54	3.1079	TCGA-73-4662-01
LUAD(N=509)	2.28	1.8242	TCGA-55-6712-01
LUAD(N=509)	0.8	2.3508	TCGA-97-7553-01
LUAD(N=509)	20.54	3.8116	TCGA-49-AARE-01
LUAD(N=509)	0.54	1.2147	TCGA-50-8460-01
LUAD(N=509)	8.52	2.5585	TCGA-50-5933-01
LUAD(N=509)	4.78	2.9655	TCGA-44-6774-01
LUAD(N=509)	5.96	2.8838	TCGA-73-4670-01
LUAD(N=509)	0.9	2.5313	TCGA-55-A48Z-01
LUAD(N=509)	3.38	2.0218	TCGA-75-7031-01
LUAD(N=509)	3.86	1.8918	TCGA-44-A47A-01
LUAD(N=509)	12	3.0323	TCGA-05-4398-01
LUAD(N=509)	1.8	0.8961	TCGA-67-3773-01
LUAD(N=509)	18.56	2.3732	TCGA-64-5781-01
LUAD(N=509)	0.54	1.7532	TCGA-97-7552-01
LUAD(N=509)	13.9	2.1444	TCGA-49-AARN-01
LUAD(N=509)	0.68	2.667	TCGA-44-3919-01
LUAD(N=509)	6.74	2.1313	TCGA-99-8032-01
LUAD(N=509)	3.52	3.3759	TCGA-55-8299-01
LUAD(N=509)	6.32	2.8838	TCGA-55-A491-01
LUAD(N=509)	1.56	3.7204	TCGA-50-6595-01
LUAD(N=509)	2.14	3.0533	TCGA-95-A4VP-01
LUAD(N=509)	11.84	3.074	TCGA-55-8302-01
LUAD(N=509)	6.64	0.690953	TCGA-44-4112-01
LUAD(N=509)	4.8	2.4144	TCGA-05-4430-01
LUAD(N=509)	3.94	3.9819	TCGA-75-7027-01
LUAD(N=509)	5.06	2.4252	TCGA-44-2668-01
LUAD(N=509)	17.7	3.074	TCGA-55-8507-01
LUAD(N=509)	1.4	1.3735	TCGA-69-8254-01
LUAD(N=509)	12.58	3.2189	TCGA-78-8640-01
LUAD(N=509)	25.1	3.1876	TCGA-69-7979-01
LUAD(N=509)	0.88	1.7954	TCGA-55-7573-01
LUAD(N=509)	2	1.412	TCGA-49-4506-01
LUAD(N=509)	2.12	2.4035	TCGA-05-4402-01
LUAD(N=509)	10.72	2.6255	TCGA-44-8119-01
LUAD(N=509)	3.82	2.3732	TCGA-55-7724-01
LUAD(N=509)	3.4	2.0004	TCGA-44-6776-01
LUAD(N=509)	5.32	1.7009	TCGA-49-4514-01
LUAD(N=509)	3.52	2.874	TCGA-05-4396-01
LUAD(N=509)	3.5	2.6602	TCGA-55-8204-01
LUAD(N=509)	0.14	2.0569	TCGA-L4-A4E6-01
LUAD(N=509)	0.88	2.9729	TCGA-75-6205-01
LUAD(N=509)	16.24	3.5645	TCGA-62-A46O-01
LUAD(N=509)	26.1	5.2891	TCGA-78-7155-01
LUAD(N=509)	0.96	2.5437	TCGA-62-A472-01
LUAD(N=509)	4.6	2.1606	TCGA-NJ-A55R-01
LUAD(N=509)	1.42	2.8014	TCGA-62-8395-01
LUAD(N=509)	15.56	3.0893	TCGA-95-7567-01
LUAD(N=509)	1.76	2.1988	TCGA-50-5051-01
LUAD(N=509)	6.28	2.2901	TCGA-55-A48Y-01
LUAD(N=509)	6.16	1.334	TCGA-86-A456-01
LUAD(N=509)	1.54	0.6145	TCGA-50-5068-01
LUAD(N=509)	1.86	1.9111	TCGA-NJ-A55A-01
LUAD(N=509)	1.4	2.4701	TCGA-J2-A4AG-01
LUAD(N=509)	6.28	2.1798	TCGA-05-4405-01
LUAD(N=509)	1	2.3816	TCGA-50-5944-01
LUAD(N=509)	5.28	3.1062	TCGA-86-7955-01
LUAD(N=509)	0.92	2.004	TCGA-50-6673-01
LUAD(N=509)	4.1	3.2885	TCGA-55-7727-01
LUAD(N=509)	5.26	2.5876	TCGA-55-8510-01
LUAD(N=509)	2.06	3.0978	TCGA-MP-A4T8-01
LUAD(N=509)	8.76	2.1574	TCGA-86-8279-01
LUAD(N=509)	4.04	2.6208	TCGA-55-A494-01
LUAD(N=509)	3.72	1.72944	TCGA-44-3917-01
LUAD(N=509)	2.94	3.6486	TCGA-75-5125-01
LUAD(N=509)	1.78	2.7139	TCGA-55-8615-01
LUAD(N=509)	7.12	3.1844	TCGA-MP-A4TF-01
LUAD(N=509)	2.08	2.5213	TCGA-55-6979-01
LUAD(N=509)	23	2.6255	TCGA-86-A4JF-01
LUAD(N=509)	3.22	2.5511	TCGA-86-7701-01
LUAD(N=509)	1.46	3.3278	TCGA-62-8398-01
LUAD(N=509)	4.52	1.7489	TCGA-L9-A443-01
LUAD(N=509)	4.28	3.0961	TCGA-78-8660-01
LUAD(N=509)	3.9	2.8582	TCGA-78-7148-01
LUAD(N=509)	1.76	2.2268	TCGA-67-6215-01
LUAD(N=509)	22.36	1.9527	TCGA-55-A490-01
LUAD(N=509)	8.72	2.409	TCGA-69-7974-01
LUAD(N=509)	10.18	2.9186	TCGA-49-AAR4-01
LUAD(N=509)	4.66	1.736	TCGA-05-4418-01
LUAD(N=509)	4.36	2.7742	TCGA-35-4123-01
LUAD(N=509)	6.72	2.7051	TCGA-55-6969-01
LUAD(N=509)	0.76	2.7314	TCGA-91-8497-01
LUAD(N=509)	2.08	2.0742	TCGA-62-A470-01
LUAD(N=509)	8.32	2.9966	TCGA-53-A4EZ-01
LUAD(N=509)	1.38	1.8404	TCGA-78-7162-01
LUAD(N=509)	0.68	2.0395	TCGA-62-A46Y-01
LUAD(N=509)	3.16	2.5634	TCGA-62-A46R-01
LUAD(N=509)	3.74	2.8442	TCGA-05-4244-01
LUAD(N=509)	13.32	2.7314	TCGA-L9-A8F4-01
LUAD(N=509)	1.84	2.8838	TCGA-55-7726-01
LUAD(N=509)	0.68	2.2753	TCGA-49-4512-01
LUAD(N=509)	15.8	3.5547	TCGA-73-A9RS-01
LUAD(N=509)	1.28	2.118	TCGA-MP-A4TD-01
LUAD(N=509)	0.74	2.6805	TCGA-75-5147-01
LUAD(N=509)	3.9	2.1798	TCGA-44-7671-01
LUAD(N=509)	12.58	3.2677	TCGA-38-4631-01
LUAD(N=509)	2.5	2.0742	TCGA-NJ-A55O-01
LUAD(N=509)	6.42	2.7292	TCGA-75-6211-01
LUAD(N=509)	1.46	1.7702	TCGA-05-5420-01
LUAD(N=509)	2.46	3.9974	TCGA-55-1594-01
LUAD(N=509)	2.34	3.992	TCGA-64-5774-01
LUAD(N=509)	6.48	2.8641	TCGA-50-5941-01
LUAD(N=509)	2.9	2.43504	TCGA-44-2662-01
LUAD(N=509)	0.46	1.4652	TCGA-97-A4M2-01
LUAD(N=509)	10.96	3.4224	TCGA-55-7995-01
LUAD(N=509)	18.1	2.4225	TCGA-95-7043-01
LUAD(N=509)	8.76	2.3048	TCGA-NJ-A4YP-01
LUAD(N=509)	0.72	0.9642	TCGA-97-A4M1-01
LUAD(N=509)	2.38	1.5661	TCGA-78-7149-01
LUAD(N=509)	4.42	3.2707	TCGA-MP-A4TC-01
LUAD(N=509)	2.6	2.1411	TCGA-97-A4M5-01
LUAD(N=509)	7.84	1.6374	TCGA-99-8028-01
LUAD(N=509)	3.42	2.0218	TCGA-67-6217-01
LUAD(N=509)	0.88	2.8936	TCGA-44-A47B-01
LUAD(N=509)	2.16	2.0218	TCGA-38-4628-01
LUAD(N=509)	5.92	3.66	TCGA-05-4250-01
LUAD(N=509)	1.62	2.118	TCGA-67-3774-01
LUAD(N=509)	2.84	2.727	TCGA-80-5608-01
LUAD(N=509)	3.64	2.6647	TCGA-05-4389-01
LUAD(N=509)	0.2	1.7617	TCGA-75-6203-01
LUAD(N=509)	0.92	3.2405	TCGA-55-6981-01
LUAD(N=509)	2.7	2.6895	TCGA-55-7903-01
LUAD(N=509)	2.14	2.9929	TCGA-62-8394-01
LUAD(N=509)	4.84	2.2513	TCGA-49-4488-01
LUAD(N=509)	2.56	1.3283	TCGA-78-7537-01
LUAD(N=509)	3.42	2.7073	TCGA-80-5611-01
LUAD(N=509)	4.46	1.9264	TCGA-55-6972-01
LUAD(N=509)	1.54	1.7403	TCGA-97-7941-01
LUAD(N=509)	2.1	2.1862	TCGA-91-6840-01
LUAD(N=509)	10.02	2.296	TCGA-69-7978-01
LUAD(N=509)	18.68	1.9931	TCGA-50-5930-01
LUAD(N=509)	8.36	2.7161	TCGA-93-8067-01
LUAD(N=509)	5.24	2.7444	TCGA-44-A479-01
LUAD(N=509)	0.5	2.233	TCGA-55-8087-01
LUAD(N=509)	0.84	2.8542	TCGA-86-6562-01
LUAD(N=509)	0.72	2.1013	TCGA-05-4425-01
LUAD(N=509)	1.04	2.2113	TCGA-MP-A4SW-01
LUAD(N=509)	0.76	1.9895	TCGA-55-8512-01
LUAD(N=509)	3.56	1.4547	TCGA-67-3770-01
LUAD(N=509)	5.02	3.7291	TCGA-50-6592-01
LUAD(N=509)	1.38	3.1556	TCGA-55-6975-01
LUAD(N=509)	1.94	1.0433	TCGA-S2-AA1A-01
LUAD(N=509)	9.28	3.1588	TCGA-55-8511-01
LUAD(N=509)	0.78	2.5061	TCGA-05-4434-01
LUAD(N=509)	9.1	2.5011	TCGA-55-8092-01
LUAD(N=509)	0.64	1.5216	TCGA-L9-A50W-01
LUAD(N=509)	4.4	3.5535	TCGA-44-7661-01
LUAD(N=509)	0.82	2.2813	TCGA-05-4426-01
LUAD(N=509)	9.4	3.2359	TCGA-05-4390-01
LUAD(N=509)	2.94	1.3679	TCGA-64-5815-01
LUAD(N=509)	0.5	2.0183	TCGA-69-7761-01
LUAD(N=509)	4.8	1.9601	TCGA-55-8301-01
LUAD(N=509)	2.54	1.4388	TCGA-44-A4SU-01
LUAD(N=509)	10.18	2.4857	TCGA-69-7765-01
LUAD(N=509)	0.62	2.7636	TCGA-05-4433-01
LUAD(N=509)	3.16	1.736	TCGA-55-8508-01
LUAD(N=509)	2	2.8858	TCGA-50-5044-01
LUAD(N=509)	2.14	2.3898	TCGA-05-4384-01
LUAD(N=509)	2.94	2.6067	TCGA-O1-A52J-01
LUAD(N=509)	13.7	3.4984	TCGA-78-7220-01
LUAD(N=509)	0.66	2.5536	TCGA-05-4422-01
LUAD(N=509)	1.58	3.4765	TCGA-44-6779-01
LUAD(N=509)	5.02	2.7183	TCGA-86-8672-01
LUAD(N=509)	1.98	2.0218	TCGA-55-6983-01
LUAD(N=509)	5.64	3.3952	TCGA-91-8499-01
LUAD(N=509)	7.28	4.3492	TCGA-91-6836-01
LUAD(N=509)	1.04	1.3623	TCGA-38-7271-01
LUAD(N=509)	2.86	1.4962	TCGA-NJ-A4YG-01
LUAD(N=509)	5.9	1.9264	TCGA-73-4658-01
LUAD(N=509)	1.02	1.4911	TCGA-86-8076-01
LUAD(N=509)	3.06	1.9377	TCGA-55-6987-01
LUAD(N=509)	3.3	1.5013	TCGA-78-7152-01
LUAD(N=509)	2.52	1.7229	TCGA-55-8096-01
LUAD(N=509)	2.1	2.4386	TCGA-75-5122-01
LUAD(N=509)	5.22	3.4318	TCGA-50-5931-01
LUAD(N=509)	10.04	2.8858	TCGA-49-AARO-01
LUAD(N=509)	2.68	2.2603	TCGA-44-2655-01
LUAD(N=509)	7.38	2.4359	TCGA-73-4668-01
LUAD(N=509)	4.68	3.8769	TCGA-91-6831-01
LUAD(N=509)	9.64	2.081	TCGA-L9-A444-01
LUAD(N=509)	9.84	2.6441	TCGA-05-5425-01
LUAD(N=509)	1.08	2.51373	TCGA-44-6775-01
LUAD(N=509)	0.5	1.1577	TCGA-75-7025-01
LUAD(N=509)	0.54	1.6695	TCGA-05-5429-01
LUAD(N=509)	7.96	2.0878	TCGA-99-7458-01
LUAD(N=509)	4.6	2.7379	TCGA-97-7546-01
LUAD(N=509)	1.46	0.8568	TCGA-67-3772-01
LUAD(N=509)	4.16	2.362	TCGA-05-4395-01
LUAD(N=509)	3.34	1.7273	TCGA-91-7771-01
LUAD(N=509)	0.38	1.6187	TCGA-55-6984-01
LUAD(N=509)	16.62	1.71416	TCGA-44-3918-01
LUAD(N=509)	1.48	1.7828	TCGA-50-8459-01
LUAD(N=509)	13.96	3.4752	TCGA-69-7980-01
LUAD(N=509)	1.32	2.8055	TCGA-50-5939-01
LUAD(N=509)	10.04	2.7029	TCGA-75-5126-01
LUAD(N=509)	9.16	3.6428	TCGA-50-6594-01
LUAD(N=509)	1.22	2.9013	TCGA-MP-A5C7-01
LUAD(N=509)	0.68	1.56281	TCGA-44-5645-01
LUAD(N=509)	1.74	1.8564	TCGA-50-5935-01
LUAD(N=509)	2.98	2.3337	TCGA-55-7914-01
LUAD(N=509)	6.4	3.1409	TCGA-55-7576-01
LUAD(N=509)	0.7	1.22713	TCGA-44-2666-01
LUAD(N=509)	0.68	2.5707	TCGA-55-7284-01
LUAD(N=509)	1.58	2.7073	TCGA-73-4676-01
LUAD(N=509)	3.66	1.3225	TCGA-78-7166-01
LUAD(N=509)	4.06	4.0688	TCGA-83-5908-01
LUAD(N=509)	13.86	2.3337	TCGA-50-5049-01
LUAD(N=509)	3.44	2.8096	TCGA-44-3396-01
LUAD(N=509)	4.5	1.8201	TCGA-97-8172-01
LUAD(N=509)	0.72	2.0878	TCGA-50-6597-01
LUAD(N=509)	5.04	3.9022	TCGA-69-8255-01
LUAD(N=509)	0.86	2.2391	TCGA-62-A46U-01
LUAD(N=509)	2.52	3.2766	TCGA-97-8176-01
LUAD(N=509)	19	4.9732	TCGA-86-8358-01
LUAD(N=509)	3.3	4.2548	TCGA-05-4415-01
LUAD(N=509)	7.76	1.683	TCGA-55-7281-01
LUAD(N=509)	2.9	1.9073	TCGA-78-7161-01
LUAD(N=509)	3.38	2.7095	TCGA-49-4507-01
LUAD(N=509)	1.08	2.118	TCGA-55-8621-01
LUAD(N=509)	2.96	2.7205	TCGA-55-6970-01
LUAD(N=509)	0.92	2.7227	TCGA-75-6207-01
LUAD(N=509)	9.64	4.149	TCGA-55-8205-01
LUAD(N=509)	1.18	2.4279	TCGA-69-7763-01
LUAD(N=509)	5.72	3.3717	TCGA-55-7913-01
LUAD(N=509)	0.48	0.688	TCGA-62-8397-01
LUAD(N=509)	3.64	3.0706	TCGA-73-4659-01
LUAD(N=509)	7.48	2.7205	TCGA-91-A4BC-01
LUAD(N=509)	0.98	2.5188	TCGA-97-8547-01
LUAD(N=509)	0.52	2.6647	TCGA-97-8175-01
LUAD(N=509)	0.76	2.5972	TCGA-86-8075-01
LUAD(N=509)	7.62	2.5363	TCGA-55-6985-01
LUAD(N=509)	7.02	2.5288	TCGA-55-A48X-01
LUAD(N=509)	6.78	1.0779	TCGA-44-2657-01
LUAD(N=509)	7.02	2.9413	TCGA-95-7562-01
LUAD(N=509)	2.34	0.8647	TCGA-55-7725-01
LUAD(N=509)	8.08	2.5972	TCGA-69-A59K-01
LUAD(N=509)	1.86	2.1734	TCGA-05-5715-01
LUAD(N=509)	5.58	1.9302	TCGA-55-A492-01
LUAD(N=509)	3.14	3.4907	TCGA-78-7145-01
LUAD(N=509)	1.74	2.4117	TCGA-86-8278-01
LUAD(N=509)	7.7	3.3814	TCGA-MN-A4N5-01
LUAD(N=509)	8.12	2.0465	TCGA-64-5778-01
LUAD(N=509)	2.54	2.7183	TCGA-J2-8194-01
LUAD(N=509)	0.72	2.4359	TCGA-55-A57B-01
LUAD(N=509)	0.52	2.0912	TCGA-38-4627-01
LUAD(N=509)	3.6	3.9213	TCGA-86-7711-01
LUAD(N=509)	2.58	1.0642	TCGA-05-5423-01
LUAD(N=509)	0.66	0.6425	TCGA-91-8496-01
LUAD(N=509)	0.8	2.1957	TCGA-86-8280-01
LUAD(N=509)	0.52	1.51649	TCGA-44-6146-01
LUAD(N=509)	5.96	4.2419	TCGA-78-7146-01
LUAD(N=509)	5.48	2.4857	TCGA-35-4122-01
LUAD(N=509)	0.16	2.1766	TCGA-78-8648-01
LUAD(N=509)	0.9	3.637	TCGA-86-7953-01
LUAD(N=509)	2.12	3.5287	TCGA-44-5643-01
LUAD(N=509)	1.84	2.3308	TCGA-73-7498-01
LUAD(N=509)	11.7	3.2174	TCGA-75-6214-01
LUAD(N=509)	1.92	1.787	TCGA-93-7348-01
LUAD(N=509)	2.96	1.9822	TCGA-97-8174-01
LUAD(N=509)	8.52	3.4304	TCGA-55-8620-01
LUAD(N=509)	8.66	4.5392	TCGA-62-8399-01
LUAD(N=509)	2.04	2.6185	TCGA-80-5607-01
LUAD(N=509)	6.88	2.081	TCGA-49-AAR2-01
LUAD(N=509)	0.38	1.884	TCGA-55-6543-01
LUAD(N=509)	0.82	1.3109	TCGA-49-4501-01
LUAD(N=509)	5.28	1.4494	TCGA-78-7156-01
LUAD(N=509)	2.06	2.2082	TCGA-62-A46S-01
LUAD(N=509)	12.14	2.7357	TCGA-49-AARQ-01
LUAD(N=509)	1.32	3.2707	TCGA-93-A4JN-01
LUAD(N=509)	1.12	3.5994	TCGA-91-6847-01
LUAD(N=509)	1.98	2.5036	TCGA-55-6642-01
LUAD(N=509)	7.14	2.4779	TCGA-55-8203-01
LUAD(N=509)	18.18	3.9185	TCGA-44-7670-01
LUAD(N=509)	1.66	2.1541	TCGA-MP-A4TJ-01
LUAD(N=509)	0.96	1.5316	TCGA-38-6178-01
LUAD(N=509)	1.22	2.6783	TCGA-86-8074-01
LUAD(N=509)	12.78	2.2019	TCGA-55-8616-01
LUAD(N=509)	6.64	1.2271	TCGA-97-A4M0-01
LUAD(N=509)	7.66	2.8936	TCGA-49-6767-01
LUAD(N=509)	5.42	2.9544	TCGA-55-1595-01
LUAD(N=509)	0.06	1.8801	TCGA-49-AARR-01
LUAD(N=509)	0.56	3.074	TCGA-MP-A4T9-01
LUAD(N=509)	1.64	0.848796	TCGA-44-6147-01
LUAD(N=509)	24.52	2.7073	TCGA-86-8073-01
LUAD(N=509)	25.56	1.9377	TCGA-MN-A4N4-01
LUAD(N=509)	3.7	1.9377	TCGA-97-A4M3-01
LUAD(N=509)	1.34	1.8762	TCGA-86-7714-01
LUAD(N=509)	6.16	3.2811	TCGA-49-4487-01
LUAD(N=509)	5.96	3.3421	TCGA-78-7542-01
LUAD(N=509)	4.46	2.8301	TCGA-95-A4VK-01
LUAD(N=509)	26.44	3.3633	TCGA-55-7994-01
LUAD(N=509)	4.48	3.242	TCGA-49-6742-01
LUAD(N=509)	1.42	2.2543	TCGA-MP-A4T6-01
LUAD(N=509)	29.64	2.4439	TCGA-55-8506-01
LUAD(N=509)	6.22	3.5022	TCGA-MP-A4TA-01
LUAD(N=509)	0.48	1.7912	TCGA-55-8091-01
LUAD(N=509)	5.04	2.7139	TCGA-91-6828-01
LUAD(N=509)	7.28	1.2023	TCGA-35-5375-01
LUAD(N=509)	5.24	1.787	TCGA-97-A4M7-01
LUAD(N=509)	7.96	2.2723	TCGA-78-7539-01
LUAD(N=509)	1.18	1.9638	TCGA-J2-8192-01
LUAD(N=509)	2.54	3.6195	TCGA-86-7713-01
LUAD(N=509)	0.62	2.1574	TCGA-67-6216-01
LUAD(N=509)	1.48	2.2842	TCGA-44-A47G-01
LUAD(N=509)	0.08	2.236	TCGA-55-7816-01
LUAD(N=509)	5.6	2.6278	TCGA-78-7147-01
LUAD(N=509)	3.02	1.5465	TCGA-44-3398-01
LUAD(N=509)	1.9	2.5996	TCGA-78-7633-01
LUAD(N=509)	0	1.8722	TCGA-86-A4P8-01
LUAD(N=509)	2.74	2.328	TCGA-78-7535-01
LUAD(N=509)	0.52	2.2051	TCGA-86-8671-01
LUAD(N=509)	1.32	2.9243	TCGA-91-6835-01
LUAD(N=509)	2.1	1.6187	TCGA-35-3615-01
LUAD(N=509)	0.28	1.0293	TCGA-55-6980-01
LUAD(N=509)	1.92	3.4752	TCGA-50-5936-01
LUAD(N=509)	1.14	1.8119	TCGA-73-4675-01
LUAD(N=509)	1.36	3.0995	TCGA-50-5932-01
LUAD(N=509)	1.06	2.2019	TCGA-93-A4JO-01
LUAD(N=509)	2.24	2.2543	TCGA-49-AAR3-01
LUAD(N=509)	3.66	3.1637	TCGA-78-7154-01
LUAD(N=509)	5.36	2.9394	TCGA-55-7910-01
LUAD(N=509)	2.48	2.1734	TCGA-4B-A93V-01
LUAD(N=509)	1.92	0.8805	TCGA-91-6849-01
LUAD(N=509)	2.78	2.1957	TCGA-MP-A4SY-01
LUAD(N=509)	5.78	3.0358	TCGA-MP-A4SV-01
LUAD(N=509)	0.1	1.7786	TCGA-55-8513-01
LUAD(N=509)	6.7	2.8602	TCGA-MP-A4T4-01
LUAD(N=509)	1.58	3.2557	TCGA-71-8520-01
LUAD(N=509)	2.94	2.4035	TCGA-44-7672-01
LUAD(N=509)	5.24	2.7931	TCGA-50-6593-01
LUAD(N=509)	4.5	3.8431	TCGA-69-7973-01
LUAD(N=509)	17.66	3.1129	TCGA-67-3771-01
LUAD(N=509)	2.82	3.1278	TCGA-99-8033-01
LUAD(N=509)	9.48	4.4706	TCGA-91-6848-01
LUAD(N=509)	0.98	2.8661	TCGA-93-A4JP-01
LUAD(N=509)	0.22	1.2815	TCGA-38-A44F-01
LUAD(N=509)	6.02	2.9747	TCGA-44-7660-01
LUAD(N=509)	1.16	2.3592	TCGA-69-7760-01
LUAD(N=509)	1.4	2.7508	TCGA-69-7764-01
LUAD(N=509)	0.52	0.769215	TCGA-44-2665-01
LUAD(N=509)	2.38	3.4331	TCGA-55-8505-01
LUAD(N=509)	3.7	3.3192	TCGA-95-7944-01
LUAD(N=509)	26.24	3.4156	TCGA-L9-A7SV-01
LUAD(N=509)	20.62	3.3675	TCGA-55-8089-01
LUAD(N=509)	3.78	2.7784	TCGA-55-7283-01
LUAD(N=509)	12.76	2.3366	TCGA-44-8117-01
LUAD(N=509)	5.58	2.4831	TCGA-53-7626-01
LUAD(N=509)	8.16	2.5487	TCGA-86-8673-01
LUAD(N=509)	1.54	3.1145	TCGA-95-8494-01
LUAD(N=509)	0.98	1.2023	TCGA-97-8171-01
LUAD(N=509)	4.1	2.2421	TCGA-50-7109-01
LUAD(N=509)	5.28	2.7993	TCGA-44-6145-01
LUAD(N=509)	4.24	2.3953	TCGA-55-8085-01
LUAD(N=509)	10.22	2.1541	TCGA-NJ-A4YF-01
LUAD(N=509)	0.52	1.46	TCGA-NJ-A7XG-01
LUAD(N=509)	2.24	1.4494	TCGA-05-4403-01
LUAD(N=509)	1.9	1.9601	TCGA-55-8097-01
LUAD(N=509)	19	2.5462	TCGA-NJ-A4YQ-01
LUAD(N=509)	2.78	2.0535	TCGA-97-7547-01
LUAD(N=509)	7.42	3.551	TCGA-55-5899-01
LUAD(N=509)	13.76	4.5224	TCGA-05-4397-01
LUAD(N=509)	6.3	1.9034	TCGA-44-6777-01
LUAD(N=509)	2.42	2.7227	TCGA-55-7815-01
LUAD(N=509)	3.54	2.2633	TCGA-91-6830-01
LUAD(N=509)	8.22	2.8974	TCGA-44-A4SS-01
LUAD(N=509)	2.46	1.0779	TCGA-44-7659-01
LUAD(N=509)	2.78	1.7229	TCGA-53-7813-01
LUAD(N=509)	30.36	2.6487	TCGA-05-4382-01
LUAD(N=509)	2.44	2.4225	TCGA-93-A4JQ-01
LUAD(N=509)	6.38	2.4492	TCGA-05-5428-01
LUAD(N=509)	0.36	1.9601	TCGA-55-6986-01
LUAD(N=509)	0.64	1.0007	TCGA-91-A4BD-01
LUAD(N=509)	4.52	1.7489	TCGA-50-5066-01
LUAD(N=509)	10.96	4.1716	TCGA-49-AAR9-01
LUAD(N=509)	19.6	2.9488	TCGA-55-7907-01
LUAD(N=509)	21.06	2.9109	TCGA-95-7039-01
LUAD(N=509)	0.96	2.2813	TCGA-64-1680-01
LUAD(N=509)	0.88	1.6466	TCGA-J2-A4AE-01
LUAD(N=509)	2.72	2.9394	TCGA-86-8359-01
LUAD(N=509)	3.78	3.2205	TCGA-55-8614-01
LUAD(N=509)	4.4	2.1862	TCGA-55-7574-01
LUAD(N=509)	16	2.6208	TCGA-44-5644-01
LUAD(N=509)	4.08	3.2251	TCGA-MP-A4TI-01
LUAD(N=509)	2.5	2.0465	TCGA-95-7948-01
LUAD(N=509)	4.22	1.8363	TCGA-73-4677-01
LUAD(N=509)	1.08	1.4756	TCGA-50-5942-01
LUAD(N=509)	1.56	1.9638	TCGA-78-7167-01
LUAD(N=509)	19.06	3.1987	TCGA-78-8662-01
LUAD(N=509)	9.76	2.7357	TCGA-86-8585-01
LUAD(N=509)	1.06	4.4149	TCGA-50-6591-01
LUAD(N=509)	6.14	2.7095	TCGA-MP-A4TK-01
LUAD(N=509)	6.62	4.4324	TCGA-55-7570-01
LUAD(N=509)	0.36	0.605	TCGA-78-7163-01
LUAD(N=509)	5.04	2.667	TCGA-05-4417-01
LUAD(N=509)	1.74	2.0604	TCGA-78-8655-01
LUAD(N=509)	7.38	2.081	TCGA-97-7554-01
LUAD(N=509)	3.46	1.8323	TCGA-49-4505-01
LUAD(N=509)	3.24	2.676	TCGA-86-8669-01
LUAD(N=509)	5.64	2.7993	TCGA-55-8208-01
LUAD(N=509)	1.5	3.0568	TCGA-75-6206-01
LUAD(N=509)	1.44	2.2813	TCGA-55-6971-01
[truncated: 9,004 more rows]
