# Supplementary material for: Pan-cancer landscape of CENPO and its underlying mechanism in LUAD
Source: Respir Res. 2023 Apr 15;24:113. doi: 10.1186/s12931-023-02408-3 (PMC10105544; doi:10.1186/s12931-023-02408-3)
Supplement: Supplementary file 7 — Additional file 7: Table S5. The expressions of CENPO and 60 immune checkpoint (ICP) genes in multiple types of cancers. [file 12931_2023_2408_MOESM7_ESM.xlsx]

## Sheet: Sheet1
Table S5. The expressions of CENPO and 60 immune checkpoint (ICP) genes in multiple types of cancers.
Group	SampleName	CENPO	Inhibitory	Inhibitory	Inhibitory	Inhibitory	Inhibitory	Inhibitory	Inhibitory	Inhibitory	Inhibitory	Inhibitory	Inhibitory	Inhibitory	Inhibitory	Inhibitory	Inhibitory	Inhibitory	Inhibitory	Inhibitory	Inhibitory	Inhibitory	Inhibitory	Inhibitory	Inhibitory	Stimulaotry	Stimulaotry	Stimulaotry	Stimulaotry	Stimulaotry	Stimulaotry	Stimulaotry	Stimulaotry	Stimulaotry	Stimulaotry	Stimulaotry	Stimulaotry	Stimulaotry	Stimulaotry	Stimulaotry	Stimulaotry	Stimulaotry	Stimulaotry	Stimulaotry	Stimulaotry	Stimulaotry	Stimulaotry	Stimulaotry	Stimulaotry
			ADORA2A	ARG1	BTLA	CD274	CD276	CTLA4	EDNRB	HAVCR2	IDO1	IL10	IL13	IL4	KIR2DL1	KIR2DL3	LAG3	PDCD1	SLAMF7	TGFB1	TIGIT	VEGFA	VEGFB	C10orf54	VTCN1	GZMA	BTN3A1	BTN3A2	CCL5	CD27	CD28	CD40	CD40LG	CD70	CD80	CX3CL1	CXCL10	CXCL9	ENTPD1	HMGB1	ICAM1	ICOS	ICOSLG	IFNA1	IFNA2	IFNG	IL1A	IL1B	IL2
GBM	TCGA-19-1787-01	4.01793	1.0007	-0.7108	-1.7809	1.5709	7.0337	-1.3548	6.3565	4.9874	0.0014	-0.1993	-3.3076	-9.9658	-9.9658	-9.9658	2.1114	-1.3921	-0.1345	5.6404	-1.5522	5.5239	7.4073	5.5555	-0.2845	0.9642	3.2841	5.0875	3.242	0.537	-2.1779	3.868	-2.4659	-2.4659	-0.3201	5.4337	4.7088	0.8488	4.2064	8.2958	3.6635	-2.4659	2.4332	-9.9658	-9.9658	-5.0116	-0.0277	2.2051	-9.9658
GBM	TCGA-06-5412-01	3.17474	1.766	-1.1172	-4.2934	4.1161	6.8514	-1.1172	4.3931	5.582	0.5763	2.2019	-4.2934	-2.9324	-2.6349	-1.9379	-1.5951	-1.4305	-0.3201	6.0921	-0.9132	7.1839	7.2904	6.6671	-2.3147	2.4144	4.1161	4.8973	2.7784	0.1648	-2.1779	4.0549	-2.5479	-0.6193	-0.8863	4.5173	4.034	2.1988	5.1823	8.1581	3.7888	-3.1714	3.0287	-9.9658	-9.9658	-5.0116	0.688	6.007	-9.9658
GBM	TCGA-12-5299-01	3.70711	-0.2671	-4.2934	-5.5735	2.1734	6.5863	-3.3076	5.9623	4.3999	2.9032	1.2147	-9.9658	-3.3076	-9.9658	-5.5735	-1.9379	-2.4659	-2.8262	5.0917	-4.2934	8.7227	7.4806	5.2983	-6.5064	-1.8836	4.3779	5.5075	1.614	-2.0529	-2.1779	2.0742	-5.5735	-2.3147	-2.7274	5.0308	6.4833	0.9642	3.7269	8.712	5.2983	-6.5064	0.6608	-9.9658	-9.9658	-9.9658	0.0854	3.4156	-9.9658
GBM	TCGA-06-2565-01	3.85603	2.4908	-0.6643	-1.9942	0.7146	7.3679	-1.685	6.9103	3.8279	-0.6193	0.4016	-0.3201	0.1388	-4.2934	-9.9658	2.036	-2.5479	1.8957	5.546	-2.8262	8.6915	6.7706	4.773	-2.6349	1.1833	5.0601	5.306	2.5087	-0.4131	-2.0529	3.0376	-1.2828	2.7205	-0.4131	5.0657	4.6358	1.8957	4.8269	9.2395	3.1844	-3.0469	1.0293	-9.9658	-9.9658	-3.458	-0.3566	3.1245	-9.9658
GBM	TCGA-06-2561-01	3.45682	0.9716	-2.8262	-2.7274	1.334	6.3459	-0.4131	5.0584	4.9589	-3.3076	-0.5332	-2.6349	-9.9658	-9.9658	-9.9658	-0.1345	-0.9686	-1.0559	5.2208	-0.7588	6.6272	7.2249	6.0124	-5.5735	2.0844	3.6266	4.3834	3.1588	0.7832	-2.3884	3.402	-3.6259	-0.5756	-2.114	4.9093	4.1203	-1.3921	4.7555	8.5067	3.573	-2.3884	2.1378	-3.3076	-9.9658	-5.0116	-0.1187	3.5287	-9.9658
GBM	TCGA-06-0132-01	2.49057	1.2875	-1.2142	-1.7322	0.4761	5.4512	-2.114	4.9317	5.9329	1.2455	2.4117	-9.9658	-2.2447	-9.9658	-9.9658	-0.9132	-1.7809	-0.5332	5.3519	-2.1779	5.5528	7.1927	6.7292	-3.816	1.5514	4.0287	3.8944	4.0295	0.537	-0.9132	2.7139	-1.9942	-0.0277	-2.114	4.6352	4.0593	2.3926	4.2601	7.7418	4.3611	-3.458	3.0723	-9.9658	-9.9658	-9.9658	0.3231	3.833	-9.9658
GBM	TCGA-19-2629-01	4.0152	1.0503	-9.9658	-3.816	-0.2498	6.48	-1.7322	7.0637	5.291	-0.2328	0.1648	-2.9324	-9.9658	-9.9658	-9.9658	0.7916	-1.8314	-0.5756	5.7517	-1.3183	4.576	7.368	6.79	-0.3383	1.0222	4.5192	5.434	3.4156	-0.1993	-2.7274	2.5263	-3.816	-2.1779	-2.5479	6.477	3.2466	0.3573	4.0488	8.5438	2.081	-3.816	2.4465	-9.9658	-9.9658	-9.9658	-1.8314	3.0446	-9.9658
GBM	TCGA-06-0238-01	3.11265	0.2154	-2.1779	-1.4699	-0.5973	5.6436	-1.7809	5.4851	4.9472	-0.5332	1.3956	-2.7274	-9.9658	-4.6082	-5.5735	0.0718	1.2576	-0.394	4.6554	-1.2142	5.4353	6.5817	5.2032	-0.1828	2.0289	3.5486	4.1684	2.3366	-0.1187	-1.9942	2.8034	-3.3076	-0.1031	-0.5543	3.9431	4.6142	0.7058	4.1716	8.8985	2.667	-2.7274	1.9527	-9.9658	-9.9658	-3.1714	-0.0574	3.5324	-9.9658
GBM	TCGA-06-0749-01	2.86394	0.9191	-0.8084	-4.2934	0.3796	5.7658	-2.2447	5.4327	5.2285	-3.6259	0.9789	-5.5735	-2.3884	-9.9658	-9.9658	0.3573	-1.2828	-0.7834	5.7864	-2.3884	3.9478	8.0884	6.2048	-4.2934	0.1776	3.2328	3.7593	2.6371	-0.7588	-4.2934	2.6232	-3.0469	-0.4521	-1.5105	4.3709	2.3677	-2.7274	3.7324	7.8224	2.6533	-4.035	1.7009	-3.1714	-9.9658	-9.9658	0.8883	1.9302	-9.9658
GBM	TCGA-06-0174-01	4.61476	1.5854	-2.4659	-4.035	-0.7834	6.8884	-3.458	6.2599	4.0816	-2.2447	-0.1504	-4.2934	-9.9658	-4.2934	-4.2934	0.24	-2.8262	-1.5522	5.2315	-5.0116	9.5883	7.1675	4.9603	-1.5105	-1.2481	3.7825	3.9365	1.3109	-1.6394	-1.9942	2.9432	-9.9658	-0.9971	-2.114	4.5142	1.2209	-1.7809	4.3017	9.2841	2.4144	-5.0116	1.0151	-9.9658	-9.9658	-9.9658	-1.0862	1.3791	-9.9658
GBM	TCGA-06-5410-01	2.52354	1.5366	-2.3147	-2.1779	1.334	6.5557	-0.1993	3.4237	6.3724	0.5069	3.7678	-5.5735	-9.9658	-4.2934	-4.6082	-1.1811	-0.7346	0.2998	6.1131	-2.9324	5.8687	7.0071	7.2492	-3.6259	1.8564	3.9147	4.5886	4.5148	0.099	-0.7346	4.1376	-3.458	1.105	-0.1993	4.0287	2.2513	-0.0425	5.1268	8.0324	5.4751	-2.6349	2.5996	-9.9658	-9.9658	-9.9658	1.9931	5.6916	-9.9658
GBM	TCGA-28-2513-01	3.27648	1.4756	-2.2447	-0.7108	1.9149	7.1466	-1.3921	6.0949	5.2668	5.6375	0.8082	-4.6082	-2.1779	-5.0116	-5.5735	-0.3383	-0.7588	-0.4921	6.0007	-1.1811	7.5767	7.0013	6.4838	-2.8262	1.5902	4.0935	4.691	2.6984	0.537	-1.9942	3.652	-2.0529	2.4117	-1.8836	5.119	6.9863	3.2572	4.8876	8.2997	4.8958	-1.8314	1.5998	-9.9658	-9.9658	-9.9658	0.1124	2.4518	-9.9658
GBM	TCGA-76-4929-01	3.55093	0.605	-3.816	-2.3147	0.4657	6.1287	-2.3147	4.9482	4.3413	-2.1779	0.1903	-5.0116	-9.9658	-5.0116	-5.0116	0.4233	-2.4659	-1.5105	4.8915	-2.8262	8.3926	7.2411	5.978	-1.7809	-0.9132	5.026	6.0047	3.8401	-1.4305	-1.4305	2.8361	-4.2934	-0.5756	-3.0469	5.0781	3.3717	-2.0529	3.3869	7.7886	3.5633	-5.5735	1.2023	-9.9658	-9.9658	-4.6082	0.1124	2.7487	-9.9658
GBM	TCGA-06-0645-01	3.06006	1.6558	-1.1811	-3.1714	1.8119	6.5908	-1.2828	5.093	6.0635	0.1903	3.4674	-2.1779	-2.2447	-9.9658	-9.9658	0.3685	-0.9686	0.2522	6.3023	-2.1779	8.532	7.0543	6.3592	-4.035	1.1447	4.2563	5.1692	3.0602	-0.2328	-0.4521	4.0401	-4.2934	2.0289	-0.4719	5.6346	4.7746	0.9862	4.6899	8.3306	6.3662	-2.9324	3.0602	-9.9658	-9.9658	-9.9658	1.8879	5.8367	-9.9658
GBM	TCGA-32-2634-01	4.68091	1.8879	-3.816	-2.2447	-0.1187	6.7618	-2.3884	4.9175	3.5387	-2.6349	-0.6873	-2.9324	-2.3884	-9.9658	-5.5735	0.8164	-0.3566	-0.8339	5.4806	-4.035	8.6051	7.203	4.8778	-0.2328	-1.0862	3.5274	1.6512	0.9642	-1.6394	-1.3548	2.7742	-9.9658	1.9822	-1.9379	5.1752	3.0774	-0.9132	4.1318	8.0992	5.3338	-5.5735	1.8078	-9.9658	-9.9658	-9.9658	-1.0559	2.4144	-9.9658
GBM	TCGA-06-0141-01	2.95045	0.1648	-0.4325	-2.1779	1.3511	5.9978	-0.4131	5.2025	5.3576	3.4398	2.791	-1.2481	-9.9658	-3.1714	-4.2934	0.0854	-1.8836	-0.2671	5.3245	-1.7322	6.4194	7.3683	5.8861	-4.2934	2.5363	3.7356	4.2593	3.2766	0.3907	-1.1488	4.6023	-3.6259	2.7763	-2.0529	3.2915	3.6566	-0.0277	4.1211	7.9307	4.528	-2.7274	1.5902	-9.9658	-9.9658	-5.5735	-0.7588	2.9281	-9.9658
GBM	TCGA-06-0125-01	4.2357	1.8282	-3.3076	-2.114	0.9191	6.9622	-3.3076	6.0459	3.4477	-0.6416	-1.9379	-1.2828	-2.1779	-9.9658	-5.5735	0.0854	-2.7274	-2.3147	5.4591	-0.9406	10.1666	6.8926	4.7143	-2.7274	-1.7322	4.0091	4.2669	-0.1345	-1.4699	-4.035	2.3788	-5.5735	-1.5951	-1.9942	5.9301	3.3264	-0.4719	4.1194	9.0824	4.0935	-9.9658	1.5366	-9.9658	-9.9658	-9.9658	-1.8836	1.8078	-9.9658
GBM	TCGA-26-1442-01	2.20163	2.1247	-3.3076	-2.2447	0.1257	5.406	-1.5951	7.2831	3.4048	-9.9658	-1.3921	-1.1172	-9.9658	-9.9658	-9.9658	0.4657	-4.6082	-3.6259	4.6888	-2.3884	5.1736	7.2729	6.1324	-1.3548	-2.7274	4.2751	4.9089	0.2762	-0.1993	-3.3076	2.1957	-5.5735	-3.816	-4.2934	7.6246	-0.6193	-1.0862	3.5779	8.4873	2.4144	-5.0116	1.2085	-9.9658	-9.9658	-5.0116	-0.7346	2.0004	-9.9658
GBM	TCGA-26-5136-01	3.23269	1.3846	-0.7588	-2.114	0.9789	5.5034	-1.1811	5.4246	5.1851	0.4016	0.2881	-9.9658	-1.3921	-9.9658	-9.9658	2.2051	-0.8863	0.6239	5.3896	0.4447	7.4648	7.6622	4.7022	-2.9324	2.9875	4.7148	6.2565	4.1994	1.0433	-3.3076	3.6254	-3.1714	0.537	-1.2481	4.3992	5.4013	1.6374	4.2312	9.887	3.0446	-1.6394	1.4335	-9.9658	-9.9658	-1.9379	0.9642	4.5717	-9.9658
GBM	TCGA-14-1034-01	3.72244	1.2333	0.0854	-4.6082	3.2034	6.8333	-1.6394	5.1498	4.7132	-4.035	0.2881	-9.9658	-9.9658	-9.9658	-5.0116	-1.3921	-2.6349	-0.9971	5.9043	-4.2934	7.2712	7.2978	6.5322	-2.9324	1.6045	4.0969	4.1716	2.3898	-1.1172	-3.0469	2.6185	-2.0529	0.6699	-5.5735	4.565	2.982	-0.0277	4.5466	8.2011	4.6312	-3.458	3.1145	-9.9658	-9.9658	-9.9658	-0.3752	3.3076	-9.9658
GBM	TCGA-06-0184-01	2.93548	0.8805	-0.3383	-3.1714	1.2209	6.1163	-1.685	4.1103	5.6871	-1.3921	1.4335	-3.1714	-3.3076	-4.6082	-3.1714	-0.2498	-0.9406	-1.6394	6.6138	-1.9942	6.0348	7.5562	6.856	-3.6259	0.4761	4.0153	4.9477	2.3592	0.1776	-1.8836	3.0376	-3.6259	0.3685	-0.8863	4.0977	2.3077	-0.9686	4.843	7.7768	3.245	-4.6082	3.9829	-9.9658	-9.9658	-9.9658	-0.1504	2.6738	-9.9658
GBM	TCGA-12-3652-01	3.45809	0.4447	-3.6259	-3.816	-0.2498	6.329	-3.816	4.7945	1.6466	0.2762	-2.7274	-5.5735	-0.013	-9.9658	-9.9658	-0.6873	-2.114	-2.4659	4.2803	-3.816	8.4918	7.4447	4.1994	-6.5064	-0.394	4.7672	4.859	1.7532	-0.9971	-3.816	1.0363	-4.6082	0.24	-4.2934	3.7625	4.7597	-1.3548	2.5804	8.0396	3.1145	-5.5735	-0.0425	-9.9658	-9.9658	-9.9658	-0.6416	-0.8599	-9.9658
GBM	TCGA-76-4927-01	4.08324	1.6281	-4.6082	-1.9379	0.4552	7.0487	-1.7809	6.9279	5.174	-1.685	0.1124	-2.5479	-9.9658	-9.9658	-9.9658	-2.1779	-1.8836	-0.0277	5.749	-1.9942	7.7257	7.3313	5.7931	-2.7274	0.6608	3.6838	3.5827	2.59	-0.1187	-3.3076	3.9901	-3.816	-2.2447	-1.8836	4.9764	2.828	0.8164	5.1764	8.8697	5.2806	-5.5735	3.1924	-9.9658	-9.9658	-9.9658	-0.7346	2.2753	-3.0469
GBM	TCGA-14-0790-01	3.75056	1.6466	-0.5125	-2.4659	-0.8599	7.0502	-3.6259	7.4981	1.8762	0.7579	-2.6349	-1.8836	-1.5522	-9.9658	-9.9658	-0.1187	-5.5735	-0.9686	3.9901	-2.2447	5.7279	7.1548	3.8289	-2.9324	0.6608	5.1002	5.7195	2.2051	-1.9379	-3.458	1.3283	-2.4659	-4.035	-1.8314	5.2442	3.8228	3.3506	3.741	9.0388	3.3192	-2.9324	-0.8339	-2.9324	-9.9658	-9.9658	-2.6349	0.3573	-9.9658
GBM	TCGA-26-5132-01	3.62639	1.8762	-2.114	-3.3076	1.125	6.6224	-0.9971	5.7038	3.8157	-1.1811	-0.4921	-2.3147	-1.1811	-5.0116	-4.2934	0.6332	-0.8084	-0.6416	5.8069	-1.3548	9.6176	7.9216	5.4067	-2.9324	1.1117	4.2728	5.383	2.8402	0.6699	-0.7588	3.1062	-2.5479	-2.9324	-1.7809	4.4189	2.9802	1.9302	4.2173	8.2541	3.834	-1.8314	1.3397	-9.9658	-9.9658	-3.458	-1.7809	1.5612	-9.9658
GBM	TCGA-76-4932-01	4.15788	1.0915	-3.0469	-3.458	1.7617	6.7046	-9.9658	6.634	3.7072	-1.1811	-1.2481	-4.2934	0.2029	-5.0116	-5.5735	-1.685	-4.2934	-2.1779	5.4473	-3.6259	9.3067	7.5527	5.3982	-2.6349	-2.1779	4.3385	5.3234	1.0503	-1.5522	-6.5064	2.1213	-9.9658	-2.5479	-4.035	5.406	2.1862	-0.3752	4.0994	8.8598	4.1078	-5.0116	0.4657	-9.9658	-9.9658	-9.9658	-0.8339	3.2189	-9.9658
GBM	TCGA-32-1970-01	4.24792	2.3048	-0.6643	-9.9658	0.9343	5.5647	-2.3884	5.9096	3.9346	-0.3383	-2.2447	-3.1714	-9.9658	-3.816	-2.4659	-0.0425	-1.6394	-2.7274	4.8978	-2.6349	5.7618	7.1832	6.0418	-2.9324	0.1124	5.3234	6.3149	1.9034	-0.4521	-3.0469	1.6558	-5.5735	-0.6416	-4.035	4.8141	3.623	0.4233	3.945	8.1956	3.7603	-5.0116	3.3177	-9.9658	-9.9658	-5.0116	-1.5951	1.5806	-3.6259
GBM	TCGA-06-0219-01	3.23726	-0.0574	-2.9324	-3.1714	-0.2671	5.7217	-5.0116	4.8856	4.9026	0.9419	1.816	-3.458	-2.8262	-5.5735	-9.9658	-0.4521	-5.0116	0.03	4.5699	-6.5064	7.5986	7.2481	3.8983	-4.2934	1.0847	3.9478	3.8157	2.2082	-1.4699	-3.0469	2.3677	-5.0116	0.5069	-1.8314	2.5756	6.0153	-0.1031	3.9166	7.7211	1.9601	-9.9658	1.5563	-5.0116	-9.9658	-5.5735	0.8408	2.5112	-9.9658
GBM	TCGA-14-0787-01	4.06611	0.8726	-2.4659	-5.5735	2.4985	7.4072	-2.6349	5.4686	4.3548	-0.013	-0.1828	-3.458	1.3167	-9.9658	-9.9658	-1.0862	-2.1779	-0.9971	5.9876	-3.0469	7.4562	7.9516	4.9346	-4.2934	0.3231	4.2571	4.7945	2.2206	-1.5522	-3.3076	2.7572	-3.0469	-0.7834	-2.114	5.1111	4.6972	1.614	3.9856	8.181	5.5367	-3.6259	3.5947	-9.9658	-9.9658	-2.8262	-0.7588	3.0181	-9.9658
GBM	TCGA-12-0618-01	4.19454	1.5902	-1.4699	-1.7809	-0.6643	6.0392	-2.1779	6.4965	3.3076	-4.035	-1.7809	-2.5479	-9.9658	-9.9658	-5.5735	0.4967	-2.3147	-0.7588	4.4243	-2.9324	10.1586	7.6931	4.5516	-1.2481	-2.7274	4.0073	3.7421	1.0642	-0.7346	-2.3147	1.5514	-5.5735	-4.6082	-1.8836	4.3046	1.9034	-1.6394	3.1717	8.7537	3.4224	-6.5064	1.8363	-9.9658	-9.9658	-9.9658	-0.7588	1.2934	-9.9658
GBM	TCGA-27-2524-01	3.99635	1.6374	-4.2934	-5.5735	0.9268	6.7765	-4.6082	3.483	4.6029	-0.394	0.547	-4.035	0.0718	-9.9658	-9.9658	-1.4305	-2.9324	-2.2447	5.6471	-4.2934	8.1041	7.2473	4.439	-5.5735	0.9568	2.7763	3.0376	3.287	-0.9971	-2.1779	3.3076	-5.0116	4.3306	-1.2828	5.322	3.5803	-1.8314	3.8249	8.5624	5.8941	-5.0116	3.5187	-9.9658	-9.9658	-9.9658	1.642	5.5274	-9.9658
GBM	TCGA-08-0386-01	4.06696	1.8957	0.4447	-2.8262	1.196	6.3286	-1.9379	6.7879	3.3938	-1.3183	-1.3921	-3.6259	-2.8262	-9.9658	-9.9658	-0.4521	-2.8262	-2.3147	5.5379	-1.2828	9.1627	7.4711	5.1322	-3.1714	-1.7809	3.7804	5.0392	-1.1172	-2.9324	-3.3076	2.5828	-9.9658	-2.8262	-2.6349	5.1437	0.346	-2.4659	4.2304	8.7954	4.3499	-9.9658	1.6875	-9.9658	-9.9658	-9.9658	-0.3566	2.6873	-9.9658
GBM	TCGA-06-0190-01	3.84803	0.9493	-0.2498	-1.4699	1.8722	6.9098	-1.0862	5.1563	4.9649	2.167	3.1278	-3.0469	-1.9942	-9.9658	-9.9658	0.9935	0.3573	0.0014	6.8197	-0.8599	9.0513	6.5173	5.9575	-2.9324	2.7401	4.0782	3.8993	4.0532	1.7995	-0.4921	3.5935	-2.2447	4.9449	-0.6643	5.3999	2.5756	1.5115	4.5892	8.489	5.4192	-1.8836	2.5828	-9.9658	-9.9658	-5.0116	1.1706	5.2525	-9.9658
GBM	TCGA-06-0745-01	3.847	1.8078	-1.0559	-4.2934	-1.1172	6.9211	-4.035	5.5292	4.1939	-0.9132	1.1184	-3.3076	-3.6259	-4.6082	-4.6082	-0.6416	-2.114	-0.6193	6.1445	-4.2934	8.3855	8.2112	5.31	-3.816	0.5859	4.2465	5.3975	2.2113	-0.0725	-2.5479	3.5399	-3.0469	-0.4521	-2.5479	4.7533	3.4765	1.177	4.0765	8.4244	2.9637	-4.035	1.3454	-9.9658	-9.9658	-9.9658	-0.4131	3.8769	-4.2934
GBM	TCGA-26-5135-01	3.92794	3.4156	-1.685	-6.5064	0.6332	7.5019	-9.9658	4.9065	4.6764	-1.685	-0.3566	-9.9658	-9.9658	-4.6082	-9.9658	0.1124	-1.8314	-1.0262	6.4109	-0.7108	8.434	7.6447	5.6608	-3.458	0.1776	3.6883	4.7767	2.2237	-0.1665	-1.9942	4.2639	-4.2934	-1.0559	-0.8339	5.5056	3.9636	0.6699	4.8675	8.2331	4.2289	-5.5735	2.128	-9.9658	-9.9658	-9.9658	0.2522	4.6983	-9.9658
GBM	TCGA-41-3915-01	3.46073	0.7493	-0.2498	-2.6349	0.099	6.1946	-1.9379	4.8719	4.3306	-2.0529	1.4441	-2.7274	-1.5951	-5.0116	-4.6082	0.2029	-0.9686	-0.4131	5.62	-2.0529	8.9514	6.893	5.6071	-1.4699	1.8683	4.0575	3.5486	3.3478	0.7916	-1.3921	3.0252	-4.035	-0.8863	-2.0529	3.9552	1.2934	0.2762	4.1449	7.6867	4.5123	-2.0529	1.8078	-9.9658	-9.9658	-3.0469	0.4233	1.9034	-3.816
GBM	TCGA-27-1831-01	3.0738	-0.0425	-2.7274	-0.9971	3.0825	5.166	-2.5479	6.2728	4.3611	1.0433	1.3051	-2.7274	0.0158	-9.9658	-5.5735	-1.1172	-3.0469	0.03	3.3966	-1.7809	5.5361	6.9803	4.2103	-5.0116	3.2973	4.546	4.5497	2.651	-0.9971	-4.035	2.0535	-1.8836	-1.4305	-3.0469	3.1604	6.0273	1.1316	3.906	8.5679	3.0145	-4.2934	-0.5756	-9.9658	-9.9658	-4.2934	-0.6643	2.036	-3.816
GBM	TCGA-28-1753-01	4.61591	1.8604	-1.7322	-1.4699	0.9343	7.049	-0.4521	6.7494	5.0492	1.7954	1.1316	-2.4659	-9.9658	-3.816	-4.2934	0.8488	-0.7588	2.4386	5.8143	-0.7588	8.1522	7.1248	5.195	-1.8836	2.118	4.4483	5.5404	3.8054	1.125	0.9419	3.7138	-1.5105	1.4388	-0.0574	4.991	4.3285	2.6255	5.0828	9.0059	4.3406	-2.4659	2.6918	-9.9658	-9.9658	-3.816	-2.4659	2.2753	-9.9658
GBM	TCGA-12-5295-01	4.80066	-0.2671	-2.9324	-3.816	0.4233	5.4822	-1.0559	6.192	4.6508	1.736	0.547	-9.9658	-1.685	-9.9658	-5.5735	-1.1811	-1.5951	-1.2142	5.1019	-2.7274	3.1062	7.5194	6.4762	-9.9658	1.7995	3.3206	3.9487	3.3032	0.605	-0.2671	1.8604	-2.3884	-1.1172	-2.8262	3.4477	6.8674	1.1382	3.6928	7.9234	2.4544	-3.0469	0.7664	-9.9658	-9.9658	-9.9658	-4.035	-0.9132	-9.9658
GBM	TCGA-28-5204-01	4.46928	1.1577	-3.458	-4.035	2.1957	6.8576	-2.3884	6.4212	4.5577	0.4125	0.1124	-9.9658	0.8961	-3.3076	-3.6259	0.7321	-1.2481	-0.0425	5.3712	-2.9324	6.7312	7.6315	5.79	-3.1714	1.2756	4.7539	5.5543	2.8096	-0.1504	-3.0469	3.0568	-3.0469	0.3907	-1.4699	4.5826	7.0291	1.5612	4.8022	9.3822	3.1876	-4.2934	2.4492	-9.9658	-9.9658	-9.9658	-0.7588	2.5413	-9.9658
GBM	TCGA-06-2569-01	4.65305	2.4883	-1.1172	-4.2934	-0.8599	7.3796	-1.1811	2.7657	0.6699	-1.5951	-3.0469	-5.0116	-4.035	-9.9658	-9.9658	2.5437	-5.0116	-4.035	2.1766	-4.6082	5.4893	6.9265	3.2405	-2.7274	1.949	3.3464	2.0912	0.2642	-0.5543	-2.0529	1.2394	-5.5735	-9.9658	-6.5064	2.5756	0.0718	-5.5735	4.14	8.5638	1.5854	-9.9658	-0.4921	-9.9658	-9.9658	-9.9658	-9.9658	-1.685	-3.816
GBM	TCGA-27-1830-01	3.55826	1.2023	-1.0559	-1.9379	0.7916	6.7757	-1.0559	5.7677	4.5856	-2.1779	2.0395	-0.7346	-9.9658	-3.816	-5.5735	1.4011	-0.4521	-0.5973	5.5763	-1.2142	8.7033	6.8071	6.0007	-0.4325	2.4753	5.1429	4.9379	3.6691	-0.3022	-3.458	2.8482	-1.8836	-0.1345	-3.0469	4.9846	2.578	0.3907	4.197	8.2933	4.7367	-2.9324	2.5213	-9.9658	-9.9658	-9.9658	0.7233	5.6326	-9.9658
GBM	TCGA-06-2559-01	4.79073	1.884	-1.7809	-1.2828	2.578	7.2255	-1.3548	5.172	4.3889	-2.2447	0.547	-2.7274	-9.9658	-9.9658	-9.9658	1.1897	-0.5125	-0.7108	4.836	-3.816	10.297	7.3103	5.1555	-3.458	-0.0877	4.4101	4.7981	1.5758	-0.7108	0.2522	2.7336	-3.3076	-1.7322	-0.4719	4.5657	3.483	0.3573	4.8992	9.4391	4.0653	-4.2934	2.7227	-9.9658	-4.6082	-9.9658	0.044	3.5535	-9.9658
GBM	TCGA-06-0139-01	1.99635	1.7744	-0.1187	-1.685	1.7185	6.2267	-0.7108	4.0901	6.7909	1.6649	4.1563	-3.1714	-2.3147	-9.9658	-2.9324	0.8164	-0.4921	1.6964	6.0624	-0.2671	6.7331	6.8856	6.7005	-3.458	4.0653	4.5547	4.7955	3.9783	1.7403	0.7493	4.3625	-2.0529	1.683	-0.7108	2.6325	5.6671	4.6882	5.2476	7.3561	4.5602	-0.6416	1.9149	-9.9658	-9.9658	-1.5105	1.0573	4.6742	-3.1714
GBM	TCGA-27-2526-01	2.87379	0.537	-2.7274	-3.0469	0.5955	4.9127	-0.6643	5.9725	3.7635	0.2277	-1.7322	-4.6082	-9.9658	-9.9658	-5.5735	-0.0725	-0.3566	0.099	4.7549	-1.7809	4.8827	7.6824	5.4611	-5.5735	3.3492	4.1078	5.1173	4.686	1.1316	-2.3884	2.6161	-2.4659	-0.5332	-1.9379	4.7555	5.4611	3.3321	3.6916	8.8171	2.9784	-1.4699	-1.7322	-9.9658	-9.9658	-2.8262	-2.6349	0.6517	-9.9658
GBM	TCGA-06-5856-01	3.90786	2.0465	-2.3147	-0.9686	1.884	6.8891	-2.1779	6.0781	4.7077	-2.4659	0.2029	-2.114	-2.9324	-3.458	-3.0469	0.7407	-1.5105	-0.3566	5.0423	-1.2481	8.1547	6.9431	5.1672	-2.3884	1.3109	4.0619	4.4816	1.8201	-1.0559	-1.0862	3.2236	-5.5735	-1.3548	-1.5951	5.1835	3.6136	-0.6193	5.0059	8.5597	3.0774	-5.0116	0.9642	-9.9658	-9.9658	3.623	-1.2481	3.1112	-9.9658
GBM	TCGA-06-5418-01	3.55459	0.5271	-0.3566	-3.6259	1.6093	6.5042	-3.6259	6.0339	4.6352	-2.3884	1.2516	-4.2934	-9.9658	-9.9658	-9.9658	-1.8836	-3.458	-1.5105	5.5638	-3.816	10.1762	7.429	5.1177	-3.816	-1.2142	4.2616	3.7204	1.196	-0.5125	-2.7274	2.5731	-4.6082	0.2522	-1.7322	4.1788	2.9432	-4.035	4.248	8.7618	4.3321	-4.6082	1.3623	-9.9658	-9.9658	-5.0116	0.7999	3.6827	-9.9658
GBM	TCGA-06-5414-01	3.90497	1.5514	-0.7588	-2.114	2.0673	6.7054	-1.7809	5.2358	4.8924	1.9111	-0.5125	-4.2934	-0.5125	-9.9658	-5.5735	-1.7322	-1.8314	-1.2481	6.3579	-2.9324	7.3019	7.1216	5.7642	-5.0116	0.679	4.9631	5.857	2.5683	-0.5973	-1.0262	2.9637	-2.9324	1.3735	-1.8836	5.7436	4.7421	1.0151	4.5079	8.7924	5.6035	-3.6259	3.2405	-9.9658	-9.9658	-9.9658	-0.4131	3.8521	-4.035
GBM	TCGA-06-5417-01	3.94673	0.1903	-2.5479	-0.7834	-0.4325	5.3424	-9.9658	6.6153	2.9128	-9.9658	-2.7274	-2.4659	-9.9658	-9.9658	-9.9658	-1.0559	-2.9324	-9.9658	3.695	-2.3147	7.0597	7.1317	5.1518	-1.6394	-1.685	4.7688	4.8007	-0.9406	-2.9324	-5.0116	1.3956	-9.9658	-9.9658	-2.3884	5.4128	0.1388	-2.1779	3.8611	8.016	1.2756	-9.9658	-0.8339	-9.9658	-9.9658	-9.9658	0.044	-0.013	-9.9658
GBM	TCGA-26-5134-01	2.27795	-1.5522	-9.9658	-5.5735	-2.9324	3.6657	-9.9658	2.4753	1.3791	-1.8836	-3.6259	-4.6082	-9.9658	-9.9658	-5.5735	-1.1488	-4.2934	-2.6349	2.3508	-3.1714	6.6133	4.7027	1.5854	-4.035	-1.3183	1.3567	2.1378	-0.5332	-3.6259	-1.5951	0.4016	-6.5064	1.9111	-4.2934	1.9822	1.3511	0.3907	0.688	6.351	-0.013	-9.9658	-0.6643	-9.9658	-9.9658	-5.5735	-3.3076	-0.0725	-9.9658
GBM	TCGA-76-4925-01	4.62407	0.2029	-2.3884	-2.8262	1.4756	7.1401	-3.6259	7.2856	3.1813	-2.4659	-1.0862	-2.4659	-9.9658	-9.9658	-9.9658	-0.5543	-6.5064	-1.9379	4.4476	-3.3076	9.6405	7.9811	3.0791	-3.816	-1.1172	3.7688	4.565	1.5266	-1.0262	-2.6349	2.1509	-5.0116	-3.1714	-3.458	3.9892	2.4144	0.058	3.7345	9.3856	5.554	-4.2934	0.1519	-9.9658	-9.9658	-9.9658	-0.0277	3.0619	-9.9658
GBM	TCGA-28-2510-01	3.76974	1.8282	-2.3147	-5.5735	1.0222	6.1741	-1.4699	4.4919	3.7378	-3.1714	-0.2671	-1.685	-9.9658	-9.9658	-9.9658	-1.3921	-2.6349	-1.8314	4.7866	-3.1714	7.584	7.0343	6.0374	-3.816	0.3231	3.4411	3.2602	1.5854	-1.3921	-1.685	2.5388	-3.816	-2.3147	-2.8262	5.7293	1.0983	-1.8314	3.981	8.3473	3.9856	-5.5735	2.9655	-9.9658	-9.9658	-9.9658	-1.4305	3.0791	-9.9658
GBM	TCGA-06-5413-01	4.18585	1.7185	-1.5951	-0.5125	0.0854	6.7772	-1.1488	6.1215	4.8817	0.1903	2.8974	-3.1714	-1.5522	-5.5735	-5.5735	-0.2328	-0.8599	0.3115	5.1334	-1.1811	6.1918	7.0921	5.6398	-1.8836	3.0181	4.582	5.193	3.4622	1.0079	-0.7834	4.0713	-3.458	-0.5543	-1.5522	5.104	4.6071	0.9493	5.2138	9.5839	3.6405	-1.9942	1.3846	-9.9658	-9.9658	-4.035	0.4447	3.6195	-9.9658
GBM	TCGA-06-0646-01	4.21649	1.5902	-2.0529	-2.5479	1.4808	6.5953	-3.458	6.0928	5.5763	-0.1665	1.3679	-2.5479	-3.6259	-9.9658	-9.9658	1.1447	-2.114	-0.3566	5.5778	-0.3201	9.9948	7.4019	5.5088	-2.2447	0.8246	4.5299	4.5311	2.3106	0.03	-3.3076	3.5387	-2.4659	-0.6416	0.1648	5.2392	4.4861	0.5763	4.3285	8.3501	6.6193	-4.035	3.1045	-9.9658	-9.9658	-4.035	1.5316	6.6963	-9.9658
GBM	TCGA-12-3650-01	4.75537	0.9493	-2.0529	-5.0116	-0.7588	6.2523	-1.3183	5.6471	4.4216	-1.2142	-0.5756	-4.6082	-9.9658	-9.9658	-9.9658	-1.3548	-0.394	-0.8863	5.3417	-1.9379	6.8618	7.5893	5.5614	-2.3884	-1.3183	3.4007	3.7794	2.0638	-0.4131	-1.7809	2.791	0.2522	-1.1172	-1.6394	4.5808	1.8282	0.5763	4.5723	9.2231	2.167	-3.6259	1.6695	-9.9658	-9.9658	-9.9658	-3.3076	-0.3752	-9.9658
GBM	TCGA-12-0616-01	4.01343	1.3567	-3.0469	-3.458	-1.3183	6.3091	-0.8084	4.677	4.1111	0.679	0.1388	-3.6259	-9.9658	-9.9658	-9.9658	0.7664	0.058	-0.2498	5.0189	-2.4659	5.3886	6.5075	5.4884	-1.9942	2.0395	3.8551	4.4641	3.6219	0.9789	-1.3548	1.5902	-3.816	2.2391	-2.1779	4.1515	3.992	2.4008	3.0585	8.9749	2.6043	-1.9942	0.5763	-9.9658	-9.9658	-4.6082	-3.3076	0.9115	-9.9658
GBM	TCGA-28-5215-01	4.68091	1.3454	-2.5479	-3.1714	0.5763	6.8338	-0.8599	3.7539	4.9189	0.2762	1.7316	-2.9324	-9.9658	-9.9658	-9.9658	0.2154	-0.2159	0.7999	5.4453	-0.8863	6.8373	7.0427	6.2828	-1.3548	2.0604	4.2951	5.4104	3.1162	1.0433	-0.3383	2.9839	-3.6259	2.1606	-1.3548	5.4006	3.2944	1.0779	4.4203	8.3956	4.6742	-3.458	2.7742	-9.9658	-9.9658	-4.035	-0.3201	4.5988	-9.9658
GBM	TCGA-19-2620-01	3.0635	0.4233	-1.5951	-4.2934	1.6045	6.251	-2.9324	6.5684	3.7614	-4.035	-0.6873	-3.1714	-9.9658	-9.9658	-3.816	0.099	-4.035	-2.3147	5.1334	-4.2934	7.8742	6.7126	5.9334	-5.5735	-2.3147	3.5212	3.8857	1.6281	-1.8314	-3.458	1.5316	-9.9658	1.6045	-2.3884	6.1928	1.0711	-3.0469	3.2174	8.6409	4.01	-5.5735	2.5036	-9.9658	-9.9658	-9.9658	-0.5543	1.334	-9.9658
GBM	TCGA-16-0846-01	3.74306	1.3901	-9.9658	-3.1714	1.7489	5.8963	-0.8084	7.2027	5.1563	1.2756	0.0854	-1.7322	-2.9324	-4.2934	-9.9658	3.5009	-0.5125	1.4174	5.2939	-0.1993	4.0773	6.7565	6.579	-0.1665	2.8199	5.0964	6.2225	4.3133	0.4657	-2.0529	2.7095	-1.9379	-3.6259	-0.5543	6.0966	6.562	1.692	3.506	8.1072	3.8085	-1.8836	4.3688	-9.9658	-9.9658	-2.6349	-0.3566	4.3399	-9.9658
GBM	TCGA-02-0047-01	3.71921	1.0222	-5.0116	-1.6394	-0.1345	6.9167	-1.0262	7.7158	4.3328	-2.0529	0.5069	-4.035	-9.9658	-9.9658	-5.0116	0.2154	-1.685	0.2998	5.6619	-0.2498	8.0592	7.1312	6.6981	-2.1779	-0.9406	4.6742	5.1297	1.7828	-1.8314	0.0014	3.7464	-9.9658	-1.5522	-2.114	6.3	3.1701	0.2522	4.6159	8.6293	4.0867	-9.9658	2.0742	-9.9658	-9.9658	-9.9658	-0.1345	3.3379	-3.3076
GBM	TCGA-19-2624-01	4.75759	2.0111	-3.6259	-2.1779	-0.4325	6.6165	-1.1172	6.4756	2.8381	-1.3183	-2.3884	-0.8084	-2.114	-9.9658	-9.9658	1.6875	-2.0529	-2.8262	4.0977	-2.6349	8.6226	7.6913	3.7335	-0.9686	-0.8084	3.3591	3.5754	1.0079	-0.3566	-3.0469	2.0111	-5.5735	-2.3884	-3.6259	5.0972	2.3337	-0.6416	3.2127	9.4625	2.5561	-6.5064	1.3901	-2.0529	-5.0116	-9.9658	-2.3147	1.7141	-9.9658
GBM	TCGA-32-1982-01	3.18907	1.7575	-1.0559	-2.6349	1.6604	6.0315	-0.6416	5.4595	4.9649	0.8327	1.816	-2.1779	1.3225	-1.9942	-3.6259	0.3115	-1.2481	0.1776	5.9528	-1.1811	8.7022	7.0729	6.7516	-2.2447	3.1669	4.6271	5.2285	4.1547	1.0293	-1.5951	4.0679	-0.6416	-1.0559	-2.7274	4.773	3.9213	2.0707	5.0113	8.5213	2.8916	-2.4659	2.0004	-9.9658	-9.9658	-2.5479	0.346	4.809	-9.9658
GBM	TCGA-27-1835-01	3.74094	1.8444	-0.9406	-1.0559	3.4971	5.7895	-3.6259	7.7682	1.2696	-2.5479	-5.0116	-0.8599	-0.0574	-4.2934	-5.0116	-1.3921	-4.6082	-2.1779	5.3837	-3.458	7.429	7.8648	3.5161	-1.7322	0.2522	3.3206	4.3249	2.3649	-1.1811	-3.816	2.6371	-3.0469	-4.2934	-3.816	4.4203	5.0777	0.5859	3.7138	8.6432	1.9859	-4.2934	0.5568	-2.8262	-9.9658	-4.6082	-4.035	-0.7588	-9.9658
GBM	TCGA-06-0747-01	3.29425	2.2543	-3.1714	-3.3076	0.4125	7.5495	-1.5951	6.5351	3.1939	2.0878	-0.6873	-1.4699	-9.9658	-9.9658	-9.9658	0.0158	-1.7322	-3.1714	5.0981	-5.0116	6.9943	6.9653	4.6159	-6.5064	-2.3147	3.8876	4.5491	0.4125	-0.6193	-4.2934	1.3846	-9.9658	-2.6349	-4.2934	4.9946	2.081	0.3231	3.1844	9.2708	3.0533	-5.5735	0.2154	-2.0529	-9.9658	-9.9658	-1.1811	3.9737	-9.9658
GBM	TCGA-28-5220-01	3.37569	0.2642	-9.9658	-1.9942	0.1648	5.6499	-2.3147	7.5711	4.9383	0.3573	-0.1828	-9.9658	-0.7834	-5.0116	-9.9658	-1.6394	-3.0469	-0.1345	4.3242	-1.7322	2.7615	7.8766	5.7845	-3.6259	1.8762	3.9874	4.7415	2.1476	-0.0277	-5.0116	2.0254	-3.1714	-4.2934	-2.2447	4.7613	5.037	1.4911	4.4067	9.0992	1.105	-6.5064	-0.0877	-9.9658	-5.0116	-9.9658	-0.3022	1.674	-9.9658
GBM	TCGA-14-0817-01	3.32194	1.3956	0.099	-4.6082	0.346	5.8187	-2.0529	4.3256	5.4433	1.4011	2.3953	-3.816	-0.0877	-5.0116	-3.6259	-0.5543	-1.5951	0.2029	5.565	-2.5479	5.8035	6.621	5.9352	-3.1714	2.2175	4.2706	4.554	3.3278	0.058	-1.2481	3.66	-2.3147	-0.8599	-0.4921	3.7919	6.2211	0.9642	4.6112	8.2608	4.2721	-3.3076	0.9568	-9.9658	-9.9658	-9.9658	1.5854	5.2619	-3.1714
GBM	TCGA-06-2570-01	3.8728	2.5413	-2.0529	-3.816	0.1648	6.2093	-2.6349	6.8864	5.1061	-2.5479	0.4016	-1.5951	-9.9658	-4.6082	-3.816	0.1519	-4.035	0.2881	5.7005	-3.6259	8.5939	6.8789	6.4212	-0.5756	0.044	4.8515	4.8304	1.2576	-1.2828	-1.1172	3.345	-9.9658	-2.5479	-1.5105	4.8064	3.5073	0.5271	4.7709	8.7686	4.0278	-6.5064	2.4035	-9.9658	-9.9658	-9.9658	0.2642	4.1053	-9.9658
GBM	TCGA-41-4097-01	3.90301	1.9527	-1.4305	-1.9379	2.2543	7.5754	-1.1172	4.7253	4.6247	-0.5543	0.7832	-2.114	-9.9658	-9.9658	-9.9658	-0.1828	-0.3201	-0.7108	5.8545	-0.7588	7.9858	7.2418	6.4436	-3.458	2.651	4.1044	4.8455	3.6961	1.6374	-0.6643	4.6154	-1.4699	4.4203	-1.5522	5.0734	2.4225	0.6608	4.1867	7.397	5.2555	-1.5522	1.7489	-9.9658	-9.9658	-2.8262	0.9268	3.6312	-9.9658
GBM	TCGA-06-0211-01	4.41177	2.39123	-1.61707	-2.87831	0.978918	7.03734	-0.997124	6.56252	4.46245	0.0854281	-0.710737	-4.6082	-1.10159	-3.71784	-5.01158	-1.51043	-2.72737	-0.564889	6.10825	-1.96577	8.26888	7.16751	5.47985	-2.77597	-0.722591	4.32271	4.8985	2.74225	-0.249845	-1.26531	3.17167	-3.81605	0.787412	-1.13289	5.4499	3.18839	0.522076	4.83571	8.69752	4.94323	-2.3147	2.37737	-9.9658	-9.9658	-5.9658	-0.543698	3.364	-9.9658
GBM	TCGA-02-2483-01	4.38403	1.2756	-2.0529	-4.035	-1.5522	6.9402	-2.7274	4.5534	4.287	-1.7809	0.0718	-4.6082	-9.9658	-3.816	-3.458	1.0642	-1.8836	0.058	5.0968	-3.0469	6.4158	7.4757	5.4932	-1.7322	1.0293	3.6961	4.3709	2.4649	-0.6416	-1.4699	2.7401	-4.6082	1.0007	-2.5479	4.3155	2.1734	0.7233	3.6543	9.0082	2.826	-4.2934	2.2693	-9.9658	-9.9658	-3.816	-2.3147	2.5188	-9.9658
GBM	TCGA-76-4931-01	4.76924	2.1541	-2.2447	-2.4659	1.3167	7.2875	-2.4659	6.8084	3.7094	-3.3076	-0.3383	-3.3076	-0.6873	-9.9658	-4.2934	-0.6193	-1.6394	-1.6394	5.109	-2.6349	9.126	7.574	4.7312	-2.7274	-0.9132	4.518	4.7756	3.3787	-0.3752	-3.6259	2.4883	-4.2934	-2.0529	-1.5522	5.9461	1.4441	-0.0277	3.992	9.277	3.8827	-9.9658	1.0222	-3.816	-9.9658	-3.816	-0.1504	2.96	-9.9658
GBM	TCGA-06-0156-01	4.31215	1.14795	0.828636	-2.63491	0.651652	6.64897	-0.320122	5.75733	4.65541	-0.533204	1.7891	-2.46595	-3.04693	-9.9658	-6.50638	0.496749	-0.913207	0.305681	5.3944	-0.664288	9.36976	7.40883	5.72508	0.183968	2.54254	4.61537	5.12399	5.10355	0.9419	-1.53117	2.95529	-3.38084	1.17375	-0.771037	4.74205	4.26124	1.45731	4.4932	8.09917	5.53485	-1.66202	2.14439	-9.9658	-9.9658	-5.01154	3.07568	4.9038	-9.9658
GBM	TCGA-27-2523-01	4.29059	1.1316	-4.6082	-3.816	3.6301	7.0803	-4.035	6.9356	3.7699	-1.2481	0.2277	-3.6259	-1.1488	-9.9658	-4.6082	0.4552	-2.9324	-0.8863	5.4486	-4.6082	8.6406	7.5981	4.245	-2.3147	0.4125	4.0977	4.6905	1.5115	-0.6873	-3.3076	3.0446	-2.7274	-2.3884	-2.7274	5.6651	2.3953	0.7146	3.833	9.5835	2.362	-6.5064	0.1519	-9.9658	-9.9658	-9.9658	-1.1172	2.3564	-9.9658
GBM	TCGA-27-1837-01	4.01258	1.8078	-4.035	-2.3884	2.4492	7.1845	-9.9658	7.0258	4.849	4.8079	-0.2671	-1.6394	-0.9686	-9.9658	-9.9658	0.7832	-3.0469	-1.685	5.8205	-4.2934	6.5461	7.1784	5.7334	-3.1714	0.517	4.9677	6.1379	1.5266	-0.1345	-5.0116	3.1426	-3.3076	-1.7322	-1.9942	6.1989	4.7496	3.5621	4.3119	8.6686	3.863	-4.035	1.5563	-9.9658	-9.9658	-3.816	0.4233	3.2389	-9.9658
GBM	TCGA-06-0744-01	3.25246	2.8014	-4.6082	-5.5735	-1.3548	6.1025	-6.5064	6.3384	3.453	-3.458	-0.2671	-3.1714	-3.3076	-5.5735	-4.2934	0.7664	-2.5479	-1.2142	5.2821	-2.9324	7.4658	7.1973	4.852	-1.685	0.5069	3.1112	3.6861	1.7575	-1.5951	-3.1714	2.8442	-5.0116	-2.3147	-2.0529	4.8939	3.0127	-0.0877	3.3869	8.7884	3.1717	-5.5735	0.5568	-9.9658	-9.9658	-9.9658	-0.9686	2.108	-9.9658
GBM	TCGA-06-0750-01	2.96536	0.8164	-2.4659	-0.9132	1.4011	6.8032	-1.7322	3.8239	3.9947	4.2781	0.8726	-3.458	-2.4659	-3.816	-3.458	-0.2845	-1.5951	-1.1172	5.4545	-2.9324	7.8307	8.0272	5.0379	-3.816	1.2333	4.4344	5.4526	2.876	-0.6873	-1.2481	3.5374	-5.0116	-2.5479	-2.8262	5.0357	6.3022	2.328	3.6219	8.0092	5.4816	-4.6082	3.9819	-9.9658	-9.9658	-9.9658	-0.1665	3.7302	-9.9658
GBM	TCGA-32-5222-01	3.50462	0.537	-0.0574	-2.9324	1.3791	6.3178	-2.7274	6.0687	5.4373	3.2915	0.2762	-3.6259	-1.2481	-5.5735	-9.9658	-1.4699	-2.4659	-1.5522	5.0926	-3.458	7.5433	6.7308	4.9575	-3.3076	0.8961	4.2297	4.4443	1.7141	-1.2142	-1.5522	2.4465	-4.2934	-1.5522	-1.6394	3.6428	6.2565	1.614	4.8289	9.2808	2.5731	-4.6082	0.434	-9.9658	-9.9658	-9.9658	0.7579	3.7804	-9.9658
GBM	TCGA-27-2519-01	3.47246	1.7446	-3.0469	-1.2142	2.2421	5.7255	-0.9406	5.0769	4.7846	0.9038	0.9642	-9.9658	-9.9658	-3.3076	-4.2934	-0.1504	-1.9379	-0.6193	4.9218	-1.4305	6.6761	7.4154	6.1637	-2.8262	2.3337	4.034	6.1231	3.1491	0.4552	-1.2142	3.1685	-3.1714	0.605	-0.7346	4.8915	4.5485	1.3846	4.3046	7.8099	6.2493	-3.3076	2.8542	-9.9658	-9.9658	-5.0116	0.3796	3.4661	-9.9658
GBM	TCGA-12-0821-01	3.90786	0.9789	-0.8863	-0.4325	-1.4699	6.9106	-5.0116	6.524	3.4778	-9.9658	-1.1811	-3.816	-0.1665	-9.9658	-9.9658	-0.1345	-1.8836	-1.5951	4.6566	-1.4699	8.7072	7.5384	4.5417	-2.8262	0.4552	4.1203	5.0597	1.7912	-0.6643	-2.5479	3.027	-5.5735	-3.0469	-2.7274	4.5299	1.6374	0.099	4.4764	9.1318	3.6428	-5.0116	-0.1031	-9.9658	-9.9658	-9.9658	-0.5756	1.4011	-9.9658
GBM	TCGA-19-2619-01	4.35187	2.2603	-0.7108	-6.5064	0.7832	6.9823	-2.3884	6.1837	3.055	-3.458	-0.6416	-9.9658	-2.114	-4.6082	-4.6082	-0.4719	-3.458	-3.6259	5.7154	-1.685	9.3687	7.3506	4.9251	-2.8262	-1.2481	4.2503	5.3477	2.1114	-1.9379	-4.035	2.2237	-9.9658	0.547	-3.1714	6.4484	3.7105	-1.5951	4.6548	9.0457	4.4536	-4.6082	1.1897	-9.9658	-9.9658	-9.9658	0.2998	3.1179	-9.9658
GBM	TCGA-12-0619-01	3.76019	1.0007	-0.0574	-4.2934	1.9601	6.6371	0.7407	5.4115	5.0246	0.1257	2.6579	-3.458	-2.2447	-2.8262	-2.8262	2.1378	0.1519	-0.6643	5.8758	-1.6394	8.6051	6.7644	6.2614	-0.7834	1.0363	4.433	5.9706	2.872	0.8246	-3.1714	2.4883	-5.5735	1.5902	-1.1811	3.7127	3.6657	1.0151	4.3855	8.4557	4.8309	-2.9324	2.7314	-9.9658	-9.9658	-9.9658	0.7407	3.9682	-9.9658
GBM	TCGA-28-5213-01	2.848	1.2147	-0.2159	-0.6416	-0.3752	5.8412	-0.1993	4.2064	5.8545	1.0642	2.9243	-9.9658	-0.5332	-9.9658	-9.9658	-1.3548	-1.3183	1.0222	4.8069	-0.5332	6.4707	6.9661	6.3521	-4.035	2.7161	4.7746	4.95	5.2273	0.7058	0.2277	3.2692	-1.685	1.8404	-0.4719	4.4758	3.9251	0.0014	5.1326	8.6135	4.6177	-2.114	3.6405	-9.9658	-9.9658	-9.9658	1.5612	4.637	-9.9658
GBM	TCGA-14-0789-01	2.96901	1.2147	-2.114	-3.816	3.4997	7.13	-0.4719	3.7867	5.2354	-0.4325	1.9226	-9.9658	-9.9658	-9.9658	-5.0116	-0.5125	-1.5105	-1.3921	6.6093	-1.7322	9.7333	7.0534	5.8733	-9.9658	0.8647	4.9928	6.4648	2.8341	0.1903	-0.0425	3.1045	-2.5479	1.0363	-0.7588	5.3484	1.8957	0.605	4.441	8.3302	6.4585	-1.8314	2.9032	-9.9658	-9.9658	-3.6259	2.4279	6.1926	-9.9658
GBM	TCGA-28-5209-01	4.38194	1.5366	-9.9658	-2.4659	0.679	7.7125	-2.7274	7.3884	3.4424	3.0217	-1.2142	-3.6259	-0.6873	-4.035	-3.458	-1.3183	-3.0469	-1.3921	5.331	-3.6259	9.04	7.3688	4.6949	-3.6259	0.1257	4.4926	5.3685	0.7999	-2.3147	-2.4659	3.0961	-3.6259	-4.2934	-1.9942	5.7178	5.436	0.2029	4.3958	9.3714	3.5136	-6.5064	1.3679	-9.9658	-9.9658	-9.9658	-1.5522	2.7249	-9.9658
GBM	TCGA-28-5218-01	4.1408	1.9302	-1.7809	-2.3147	-1.8314	8.1721	6.3649	3.1062	4.0952	0.7579	2.4857	-2.7274	-9.9658	-5.0116	-5.0116	0.5763	0.6145	1.8957	6.579	0.434	3.9337	6.7481	5.5299	0.1519	4.366	3.6195	4.2699	6.1266	3.492	0.4016	4.3576	-1.0862	0.3796	-1.9379	5.479	8.2677	2.2268	4.6944	8.5603	5.4077	0.0014	4.3356	-9.9658	-9.9658	-2.2447	-1.8836	2.081	-9.9658
GBM	TCGA-28-2514-01	4.0934	3.0688	-1.2481	-2.0529	1.595	6.6945	-3.3076	5.9484	3.9571	-0.2328	-1.1488	-2.0529	-9.9658	-5.0116	-3.0469	-1.4699	-1.7809	-1.685	5.0361	-3.816	7.7291	6.883	5.6708	-3.816	-0.7346	4.7704	5.9282	1.2394	-2.5479	-2.2447	1.9034	-9.9658	-1.4699	-1.5522	5.7247	4.4906	1.3956	4.3428	8.7282	4.711	-9.9658	1.6695	-9.9658	-9.9658	-5.0116	-0.6643	1.9188	-4.6082
GBM	TCGA-06-5859-01	4.57593	0.9642	-3.3076	-0.4719	0.6332	5.6002	1.6234	5.7811	4.8395	-1.685	2.874	-4.2934	-9.9658	-9.9658	-9.9658	-0.3022	-1.2481	-1.0262	5.3692	-2.4659	4.957	6.8491	7.4511	-3.0469	1.7954	4.7496	6.3763	3.3675	0.6969	-0.7346	1.3051	-0.8084	-1.9942	-0.9406	3.8075	4.4562	1.2023	3.9847	8.5417	2.4544	-2.3147	1.8957	-9.9658	-9.9658	-5.0116	-0.394	3.9992	-3.6259
GBM	TCGA-28-2509-01	3.8258	-0.3201	-3.458	-2.8262	1.614	7.1537	-1.2828	3.8866	4.4417	-3.0469	-1.7322	-3.458	-9.9658	-3.3076	-3.6259	-0.4131	-1.1811	-0.1504	5.403	-1.0262	9.0001	7.2909	4.9695	-3.458	0.2762	3.1245	4.4983	2.0289	-1.2481	-2.6349	1.3679	-5.5735	3.2617	-2.1779	4.7767	1.2756	-1.0862	3.3633	8.0588	4.6543	-4.6082	1.6187	-9.9658	-9.9658	-5.0116	-0.1031	2.236	-9.9658
GBM	TCGA-14-1825-01	4.77348	1.2455	-1.1488	-0.6193	0.3685	6.3916	-9.9658	6.1254	3.705	-9.9658	-3.6259	-3.6259	-9.9658	-9.9658	-9.9658	-1.9942	-0.9132	-0.2671	4.686	-3.1714	8.0129	7.4939	5.3187	-0.2159	-1.685	3.5399	3.9194	1.0573	-9.9658	-4.2934	3.0234	-9.9658	-1.7322	-2.3884	3.6793	1.4281	-1.1811	4.2995	9.2305	2.4144	-3.3076	2.0912	-9.9658	-9.9658	-9.9658	-0.6416	1.5661	-9.9658
GBM	TCGA-19-4065-01	3.51603	-0.3022	-3.1714	-2.2447	3.0927	7.0454	-2.7274	4.3364	5.2972	-0.0425	1.5514	-3.816	-2.5479	-5.5735	-9.9658	0.0718	-2.114	0.5859	5.1478	-1.4305	8.77	6.6822	5.0837	-2.3884	1.6187	4.1796	5.4182	3.3591	0.5568	-0.5543	3.1377	-3.0469	1.1512	0.2522	3.4129	4.9477	1.4174	4.4739	8.2219	4.9194	-3.1714	1.614	-9.9658	-5.0116	-5.5735	0.8408	3.9856	-4.035
GBM	TCGA-02-2485-01	3.73012	1.787	-3.0469	-1.7322	1.2147	6.9086	0.1648	7.3437	3.6393	0.7832	-0.0725	-1.9942	-9.9658	-3.816	-4.2934	1.736	-0.0725	0.058	4.6894	-2.0529	6.8089	6.8065	4.9874	-2.1779	1.3956	4.7203	5.6971	3.417	-0.4719	-2.5479	2.299	-2.1779	-1.9379	0.0158	4.3958	6.3282	2.2633	3.8983	9.0565	3.6184	-1.3183	0.5568	-9.9658	-9.9658	-2.7274	-1.0559	3.7248	-3.6259
GBM	TCGA-12-1597-01	3.7377	0.5859	-9.9658	-3.458	-1.4305	5.6488	-2.114	4.8822	3.8788	-4.035	0.4552	-5.5735	-9.9658	-9.9658	-5.5735	-2.3147	-2.114	-2.4659	4.3944	-6.5064	7.6994	7.1899	6.0798	-2.3147	-1.0862	3.3647	3.5851	0.5666	-1.7809	-4.2934	1.736	-4.035	-2.5479	-2.7274	3.8915	1.4756	-1.5522	3.4384	8.3115	1.7744	-6.5064	1.7097	-9.9658	-9.9658	-9.9658	-3.6259	-0.013	-9.9658
GBM	TCGA-28-1747-01	4.1227	0.8568	-2.9324	-1.8836	1.3901	6.5711	-1.8836	7.7325	5.7719	2.8799	-1.8836	-4.2934	-9.9658	-9.9658	-9.9658	1.2455	-1.2481	0.5271	5.6097	-2.3884	4.6525	7.539	5.9203	-3.0469	1.9034	5.0955	4.9369	3.5827	0.1519	-2.3884	2.7139	-1.4305	-0.9132	-0.4131	4.4829	6.4216	2.2723	4.7893	9.1109	2.8096	-3.3076	2.0076	-9.9658	-9.9658	-9.9658	-0.3566	2.5462	-9.9658
GBM	TCGA-28-2499-01	2.76126	1.2875	-3.816	0.0158	2.2452	5.9839	-2.5479	4.9463	3.8847	-0.1504	-1.1172	-3.816	-9.9658	-9.9658	-9.9658	-0.2845	-0.8863	-1.3921	4.7236	-2.0529	8.1464	7.6302	5.8128	-5.0116	0.7407	5.7498	6.2424	2.3135	-0.8339	-3.816	2.828	-4.6082	-1.5105	-0.8339	4.5392	4.2601	-0.1504	3.8249	7.7055	4.0207	-5.5735	-0.0574	-9.9658	-9.9658	-9.9658	-2.4659	1.949	-9.9658
GBM	TCGA-06-0649-01	3.13586	0.9568	-2.3147	-0.9132	-0.5973	5.4614	-0.4521	5.8785	5.0687	-0.8339	1.6964	-3.0469	-2.0529	-3.816	-5.5735	0.537	-0.7588	0.2998	5.4317	-0.9132	6.1583	7.0411	6.513	-3.1714	2.2452	4.2281	5.2342	2.8779	1.1897	-0.9971	2.9875	-1.7322	1.7995	-2.114	4.9883	2.4544	-0.013	4.041	7.9533	3.795	-2.2447	1.6695	-9.9658	-9.9658	-9.9658	0.4016	2.7139	-9.9658
GBM	TCGA-06-2564-01	4.30597	2.4171	-0.3201	-3.6259	2.5188	7.0948	-3.458	6.6607	5.6528	-1.5105	1.0983	-3.3076	-2.2447	-9.9658	-9.9658	-0.7346	-1.5522	-0.5125	5.8565	-3.3076	8.4573	7.4441	5.2423	-3.3076	0.2642	4.6583	5.4529	2.3308	-1.0559	-0.9686	2.9637	-3.1714	-1.3921	-1.7322	5.0215	2.6348	-1.8836	5.2877	9.1391	3.8983	-4.035	4.7976	-9.9658	-9.9658	-4.035	1.2875	3.1045	-9.9658
GBM	TCGA-06-5408-01	4.14241	0.8961	-2.1779	-3.6259	1.6512	7.1612	-4.6082	6.0721	3.6983	-1.2828	-0.3752	-4.035	-1.0262	-5.0116	-5.5735	-0.5332	-3.1714	-1.1811	5.0623	-3.6259	9.1438	7.692	5.0242	-4.035	-0.7834	5.2091	5.2487	1.8444	-0.6193	-3.458	2.694	-5.5735	0.7321	-1.1488	5.3653	4.7767	-0.9406	3.4739	9.101	4.7383	-4.6082	1.5661	-2.7274	-9.9658	-9.9658	-0.2671	3.6006	-9.9658
GBM	TCGA-27-1832-01	3.27352	0.4657	-9.9658	-1.2142	1.5165	6.6885	0.5763	3.1669	4.5644	-0.7346	-0.4521	-3.6259	-9.9658	-3.816	-9.9658	0.7233	-0.6873	-0.5543	5.608	-1.5951	7.104	7.4383	6.0257	0.2522	3.3787	3.002	2.7972	3.9947	1.3791	-3.0469	4.235	-2.114	4.4732	-2.2447	3.8769	3.1409	1.3511	3.2707	8.3871	6.1619	-2.5479	0.4552	-9.9658	-9.9658	-3.816	0.2881	3.2959	-3.1714
GBM	TCGA-14-1829-01	2.90113	0.2642	-2.7274	0.7832	0.24	4.6679	-1.5951	4.7448	4.7307	-0.5543	1.4494	-2.8262	-1.1172	-5.5735	-9.9658	-1.1811	-2.1779	0.3346	3.4984	-2.3884	6.3172	6.493	5.5258	-5.0116	2.4225	4.3513	4.0153	1.7617	-0.1031	-1.9942	2.4753	-3.458	0.5069	-2.6349	2.7594	3.7773	-0.6873	4.251	8.5428	2.1047	-2.4659	-1.1488	-9.9658	-9.9658	-5.5735	0.2642	2.2051	-9.9658
GBM	TCGA-32-2615-01	3.19058	1.3623	-2.4659	-3.458	2.4544	6.8987	-1.1172	4.8929	4.4667	-0.5125	0.0158	-2.4659	-1.2142	-9.9658	-4.6082	0.6332	-0.5332	-0.4921	5.5308	-0.7834	9.8404	7.1157	6.1439	-4.2934	2.0395	5.5012	6.1817	3.0927	0.7916	-1.8314	2.7401	-2.8262	3.2189	-0.5543	6.9767	5.1173	1.595	3.8571	8.6108	6.0288	-2.114	2.6418	-4.6082	-9.9658	-3.816	-0.2671	4.1078	-9.9658
GBM	TCGA-06-0158-01	4.08747	1.6512	-0.2845	-3.458	1.4065	6.8612	-1.4699	6.3688	5.2072	-1.1172	1.125	-2.6349	-1.4699	-9.9658	-5.5735	-0.2159	-0.1187	-0.5973	6.4207	-1.6394	8.7698	7.3162	5.9155	-9.9658	0.5859	4.6288	4.9505	2.3981	-0.1031	-2.4659	3.2929	-1.9942	-0.4521	-0.7108	6.2948	3.4331	0.3573	4.8304	8.1681	5.1182	-3.0469	2.4279	-9.9658	-9.9658	-9.9658	1.1706	4.4115	-9.9658
GBM	TCGA-06-2558-01	4.04093	2.5437	-1.9942	-2.1779	0.3115	5.6605	-1.5522	5.6308	4.5681	-3.816	0.688	-3.6259	-9.9658	-3.458	-9.9658	-0.4921	-3.0469	0.1388	5.2188	-2.6349	8.3431	6.9491	5.6465	-0.7346	1.5514	4.6352	4.7088	2.0535	-1.4699	-1.3183	3.5149	-3.3076	-3.458	-2.6349	4.6077	1.125	-2.1779	5.2567	8.5693	2.8562	-4.6082	2.5561	-9.9658	-9.9658	-4.035	0.4865	3.9356	-9.9658
GBM	TCGA-28-5216-01	3.75168	1.4388	-5.0116	-3.1714	0.03	6.9409	-4.2934	4.834	4.248	-1.1488	0.8164	-3.3076	-0.8084	-9.9658	-9.9658	-1.685	-1.0862	-0.5973	5.0811	-3.458	9.2739	7.2603	5.2936	-0.9971	-0.0725	4.2134	5.55	1.8242	-2.114	-2.1779	2.5804	-4.2934	-1.8836	-1.4305	5.5632	2.2872	-0.5125	3.551	8.2987	3.7486	-9.9658	3.1212	-9.9658	-9.9658	-9.9658	0.4447	4.2088	-4.2934
GBM	TCGA-28-5207-01	3.57776	2.5163	-1.1488	-0.8863	0.6608	5.72	-0.8339	6.3745	4.6306	-2.7274	-0.8084	-9.9658	-9.9658	-3.1714	-4.035	-1.1488	-2.114	-0.4719	5.018	0.1776	6.8491	6.3782	7.093	-2.9324	1.334	4.2781	4.9463	2.8402	0.4552	-2.5479	3.2127	-4.2934	0.03	-2.8262	5.5488	2.5112	1.8564	4.7919	9.2504	2.5011	-2.3147	1.2455	-9.9658	-9.9658	-9.9658	-1.4305	2.8402	-9.9658
GBM	TCGA-41-2572-01	3.43293	1.9415	-2.114	-1.3921	1.8363	6.6952	-2.4659	5.9411	3.7667	3.8925	-0.4719	-3.1714	-1.1811	-9.9658	-9.9658	-0.0574	-3.6259	-3.0469	5.6528	-1.1811	8.1643	7.9309	5.1235	-5.5735	0.517	4.7132	2.5658	2.5828	0.5859	-2.9324	2.6715	-4.6082	-2.2447	-3.1714	4.839	6.5823	0.2154	3.9041	8.503	4.4621	-4.6082	1.2333	-9.9658	-9.9658	-9.9658	-1.7322	1.7316	-9.9658
GBM	TCGA-06-0130-01	3.23726	1.4704	-9.9658	-0.1665	3.402	7.7881	0.6332	2.004	5.8622	3.5349	2.8055	-5.5735	-9.9658	-9.9658	-2.2447	3.3787	0.5568	3.8769	7.4678	1.5563	5.4585	7.4649	6.2317	-0.2328	4.9313	5.2634	5.993	5.599	3.5839	0.3346	4.9482	-0.5332	5.4148	0.5763	3.3633	7.7361	6.4524	4.9108	7.8281	5.8463	0.4447	2.651	-9.9658	-9.9658	0.03	0.3685	4.613	-2.7274
GBM	TCGA-06-5416-01	4.0152	1.9527	-5.0116	-1.5105	-0.0425	6.0104	-1.8314	3.637	1.6512	-1.3921	-0.7346	-1.6394	-9.9658	-9.9658	-9.9658	1.1706	-1.9942	-0.9406	4.2533	-2.3147	7.2948	6.8789	3.3993	-1.9379	-0.2498	4.1343	4.1425	1.8762	-0.4325	-4.035	3.2049	-4.2934	1.2394	-2.8262	3.7783	2.2019	0.346	3.0944	8.2435	1.177	-3.816	-0.4131	-9.9658	-9.9658	-3.0469	-2.3884	1.6512	-9.9658
GBM	TCGA-06-0168-01	3.9588	1.4228	-2.3147	-1.5951	0.8164	6.5223	-0.8084	5.0951	5.109	0.517	1.1382	-2.2447	-0.1828	-1.8836	-9.9658	0.1903	-1.0862	-0.2671	5.9656	-0.6416	6.4301	7.4879	6.4041	-9.9658	1.8242	3.6428	5.0807	3.0181	-0.4521	-4.035	3.453	-9.9658	0.4657	-1.2142	4.8895	4.8485	1.0847	4.2571	7.64	4.9098	-9.9658	2.7029	-9.9658	-9.9658	-9.9658	0.2522	3.309	-9.9658
GBM	TCGA-02-0055-01	2.51851	0.4657	-1.2142	-0.9406	4.764	7.1911	-0.6873	3.3076	4.8665	0.7832	3.3061	-3.0469	-9.9658	-9.9658	-4.035	0.0718	-0.5756	-0.5332	6.3333	-0.7588	7.7861	7.4088	5.8174	-2.7274	2.8178	4.5104	5.2196	3.637	0.2642	-2.2447	4.8837	-3.816	6.3528	0.1388	4.7099	3.9728	0.5763	3.4765	7.6603	5.9519	-3.1714	1.0007	-9.9658	-9.9658	-4.2934	0.24	4.1302	-9.9658
GBM	TCGA-06-5415-01	3.99551	1.4962	-4.6082	-3.0469	0.7407	6.2231	-2.114	6.7118	3.5669	-0.1993	-0.4719	-4.035	-2.5479	-6.5064	-6.5064	-0.0877	-1.0262	-0.5332	4.8269	-1.7322	6.0251	7.2791	5.3288	-3.3076	2.2452	4.6725	4.9991	3.3828	0.0854	-1.3921	2.4934	-5.0116	-1.7322	-1.5105	4.8279	3.794	0.7493	3.97	9.1594	3.154	-2.4659	2.5561	-9.9658	-9.9658	-5.5735	-0.394	1.8201	-9.9658
GBM	TCGA-06-5411-01	3.65537	0.7233	-0.5332	-3.1714	0.7999	6.1719	-2.3884	4.5173	4.8773	-3.3076	0.4552	-3.3076	-9.9658	-9.9658	-9.9658	0.4761	-2.114	-0.8863	4.5098	-4.035	5.8238	7.0303	5.7145	-2.9324	-0.2328	4.0001	3.9468	2.004	-0.9971	-1.9942	3.2572	-4.035	0.24	-1.4699	5.2817	2.4544	0.5859	4.5497	8.7272	3.4881	-4.035	2.6019	-9.9658	-9.9658	-9.9658	0.1776	2.8341	-2.9324
GBM	TCGA-26-5139-01	3.66449	1.3956	-1.8314	-2.3147	1.6875	6.9795	-2.2447	5.1351	4.7159	-0.4131	0.3796	-5.0116	0.24	-9.9658	-5.0116	-1.8836	-2.9324	-1.1811	4.9426	-1.6394	9.5513	7.1411	5.6329	-4.6082	0.2998	4.1547	5.2983	3.0825	-0.4719	-2.6349	2.9911	-3.3076	-0.2671	-2.4659	6.1418	4.6171	0.0854	4.3807	8.9837	5.9593	-4.2934	1.5514	-9.9658	-9.9658	-9.9658	1.0222	4.2381	-9.9658
GBM	TCGA-76-4928-01	3.17314	0.6239	-1.8314	-3.816	3.3047	7.8383	-2.3884	4.3827	4.6854	-1.8314	0.099	-9.9658	-2.5479	-9.9658	-9.9658	-1.685	-2.4659	-1.3921	5.8849	-2.3147	7.8325	7.0066	5.6165	-4.6082	1.0573	3.7571	5.1708	2.3394	-0.1993	-1.5105	2.5924	-4.2934	0.1519	-3.6259	4.3841	0.6145	-1.2142	4.2518	8.5886	4.2773	-3.0469	1.7575	-9.9658	-9.9658	-9.9658	-0.0425	2.6302	-9.9658
GBM	TCGA-06-0644-01	4.03999	1.0711	-9.9658	-3.458	3.242	8.656	-0.7346	5.1052	4.6719	1.0915	0.8488	-9.9658	-3.0469	-9.9658	-9.9658	-0.4325	-0.6643	-0.3022	6.8415	-0.394	7.4625	7.5484	4.9505	-3.3076	2.5511	4.0037	5.0475	3.5022	1.125	-0.7834	4.3002	-1.9379	5.3245	-1.0262	5.6133	3.0145	1.6649	4.1595	7.9833	6.2428	-1.1811	2.3106	-9.9658	-9.9658	-5.0116	0.2762	3.5086	-3.816
GBM	TCGA-14-0871-01	4.2555	1.2455	-3.0469	-9.9658	-0.9971	6.4128	-2.3884	1.1184	-0.0277	-0.4719	-0.6643	-9.9658	-9.9658	-3.1714	-9.9658	0.3115	-1.5951	-1.7809	4.0722	-9.9658	5.532	6.2963	1.9859	-3.816	-2.2447	4.1644	4.1351	0.8082	-1.7809	-1.8836	0.5666	-9.9658	-9.9658	-9.9658	1.9749	2.3164	0.7321	1.7403	8.525	2.7993	-9.9658	-1.9379	-9.9658	-9.9658	-9.9658	-3.6259	1.3735	-9.9658
GBM	TCGA-32-2632-01	3.39921	1.5366	-0.8863	-1.3548	0.7664	6.6023	-0.3566	5.1676	5.0653	0.0014	1.3956	-3.3076	-1.0559	-3.816	-4.6082	1.0847	-0.3022	0.8805	5.9846	-0.013	4.2419	6.7413	6.7598	-3.458	2.4359	4.2412	4.851	4.2803	2.3048	-0.7346	3.1344	-1.9942	0.8488	-1.9379	5.575	5.2161	1.7912	4.499	8.5473	4.2743	-0.9132	3.3911	-9.9658	-9.9658	-3.0469	-0.6416	2.8994	-9.9658
GBM	TCGA-06-0882-01	3.42895	1.5612	-3.816	-3.458	0.2998	6.6629	-1.7809	5.9855	5.3886	-1.3548	1.7532	-9.9658	-2.9324	-9.9658	-9.9658	-0.7834	-1.8314	-0.9406	5.7154	-2.3884	6.2774	7.6362	6.1404	-3.816	0.9568	4.0118	4.9021	2.2543	-0.2159	-1.3183	4.4223	-1.7322	1.3791	-2.3884	4.8084	3.4556	0.1388	4.5311	8.5858	6.4261	-3.816	2.5061	-3.6259	-4.035	-4.035	0.5271	3.835	-9.9658
GBM	TCGA-19-2625-01	3.06693	0.6425	-1.5522	-1.6394	0.9642	7.6846	-5.0116	3.5498	2.8641	-2.4659	-0.6193	-2.0529	-0.9686	-9.9658	-9.9658	0.03	-3.3076	-2.4659	4.866	-4.6082	9.7322	7.7574	4.4377	-3.458	-1.4305	2.7227	3.6543	1.2516	-1.5105	-4.2934	1.412	-9.9658	-3.816	-2.5479	3.9384	2.1213	-1.7809	2.1862	7.4427	5.4816	-5.5735	0.2998	-4.6082	-9.9658	-9.9658	-0.0425	1.0433	-9.9658
GBM	TCGA-32-1980-01	3.28985	2.2603	-3.816	-3.1714	1.0779	6.1906	-1.7322	4.4829	5.1256	-0.5543	0.8961	-3.3076	-9.9658	-4.6082	-3.458	-0.013	-1.4699	0.346	5.4446	-1.8314	7.4244	7.2467	6.582	-3.6259	2.9469	3.8591	3.8431	3.402	0.3796	-1.0862	4.2646	-0.7834	-0.8863	-2.4659	5.4582	4.314	2.376	4.4764	8.0161	5.2691	-2.1779	2.4225	-9.9658	-5.0116	-2.7274	0.2762	3.9682	-9.9658
GBM	TCGA-27-1834-01	4.18273	1.6045	-3.6259	-1.0862	2.3479	6.1759	-0.5125	5.8961	5.3064	0.3907	0.24	-5.0116	-9.9658	-9.9658	-5.0116	1.0573	-0.6873	0.3573	5.6727	2.4225	5.4243	7.7497	6.5934	-0.9406	3.0305	4.8324	5.7019	3.5199	0.2998	-1.8314	3.6359	-0.5973	-1.685	-0.0877	5.3107	5.8674	2.1114	4.7501	7.9345	4.3075	-2.114	2.4359	-9.9658	-9.9658	-2.8262	1.6875	4.0471	-9.9658
GBM	TCGA-41-2571-01	3.24486	1.2455	-5.5735	-4.6082	-1.9942	5.9449	-4.035	3.2205	3.6254	-3.0469	-1.0862	-2.9324	-9.9658	-9.9658	-9.9658	-1.3548	-2.3147	-2.3884	4.1579	-3.3076	9.0913	6.8019	4.1796	-1.9942	-2.114	2.4035	2.1378	0.6608	-2.1779	-2.8262	1.3454	-9.9658	-2.8262	-4.2934	2.824	-0.9132	-4.2934	2.1574	6.598	1.7273	-9.9658	1.5661	-9.9658	-9.9658	-9.9658	-0.8339	2.8974	-9.9658
GBM	TCGA-14-0781-01	2.76553	1.7185	-1.4305	-4.035	3.449	7.3895	-2.114	5.4851	4.3834	-2.8262	1.1512	-5.5735	-2.4659	-9.9658	-9.9658	-0.5332	-2.114	-2.2447	6.0215	-2.9324	8.677	7.4243	5.8977	-5.5735	0.5666	3.9719	5.2487	1.934	-0.6193	-3.1714	3.2282	-2.4659	3.9213	-2.7274	5.445	2.5137	-4.035	4.7143	8.0561	7.0938	-3.6259	2.3508	-9.9658	-9.9658	-5.0116	2.299	4.1343	-9.9658
GBM	TCGA-06-0157-01	4.3016	2.4727	-2.7274	-2.6349	-0.3201	6.9375	-2.8262	7.7188	4.3278	-0.2498	1.2756	-9.9658	-1.5105	-5.5735	-9.9658	0.2522	-2.114	0.3685	5.9315	-2.1779	7.0773	7.3744	5.3975	-2.4659	1.9968	4.3667	4.3002	3.0825	0.3115	-0.7346	2.9984	-1.5951	-2.5479	-2.6349	4.7861	3.0393	0.24	4.6358	8.2282	3.2796	-3.458	1.0983	-9.9658	-9.9658	-9.9658	-0.8599	3.38	-9.9658
GBM	TCGA-12-3653-01	4.47702	1.5316	-2.3147	-1.3548	2.4597	6.7029	-4.035	7.3576	3.8739	1.787	-1.8314	-2.8262	-9.9658	-9.9658	-9.9658	1.4174	-1.7809	-1.1488	5.0401	-2.9324	5.8217	7.5667	5.436	-3.6259	0.2642	7.2605	7.2925	1.9786	-0.4325	-1.8314	2.561	-3.3076	-3.816	0.1257	4.7225	6.8627	1.4228	3.9232	8.4496	4.5079	-2.9324	1.9895	-9.9658	-9.9658	-9.9658	-1.7809	2.9948	-9.9658
GBM	TCGA-76-4926-01	4.16346	0.8568	0.1776	-0.8084	1.0222	6.4157	-2.3884	6.494	3.449	1.3109	-0.3201	-3.3076	-9.9658	-9.9658	-9.9658	-1.0262	-4.035	-2.8262	4.4317	-1.5522	7.1259	7.2484	5.7538	-6.5064	-1.2142	4.1103	5.1264	1.1641	-0.7108	-2.6349	1.816	-4.035	1.0363	-2.2447	4.4476	4.3786	0.5568	3.8818	8.9692	3.668	-4.6082	1.6281	-9.9658	-9.9658	-9.9658	-0.8863	1.1512	-9.9658
GBM	TCGA-26-5133-01	4.35053	1.1316	-3.6259	-2.5479	1.1316	6.9104	-4.2934	5.7151	2.5948	-1.9379	-0.8339	-4.2934	-9.9658	-9.9658	-3.816	-0.0425	-2.1779	-1.9942	5.2552	-3.1714	6.7739	7.4179	4.4562	-1.0862	-1.5522	3.7345	3.9838	0.8408	-0.9406	-3.458	1.816	-4.035	1.0293	-4.035	5.3165	1.4065	-2.114	3.162	7.5877	0.8164	-6.5064	1.8036	-9.9658	-9.9658	-9.9658	-3.6259	0.03	-9.9658
GBM	TCGA-06-2562-01	3.29864	1.1577	-3.1714	-6.5064	4.6933	8.4226	-1.5522	5.9743	4.8944	-3.6259	0.24	-4.2934	-9.9658	-9.9658	-9.9658	-0.7834	-2.3884	-1.0559	6.2267	-6.5064	9.5845	7.1658	5.2157	-3.1714	-0.5756	3.8866	4.9837	1.2085	-0.9132	-2.4659	3.6657	-5.5735	-0.5756	-1.0262	5.7304	2.328	-0.5973	4.9755	8.7545	6.3686	-5.0116	2.578	-9.9658	-9.9658	-5.0116	2.0325	5.8878	-9.9658
GBM	TCGA-27-2521-01	3.34059	1.1447	-4.6082	-2.8262	-2.114	6.5008	-5.0116	7.0638	2.8199	-9.9658	-0.8863	-2.1779	-2.4659	-9.9658	-9.9658	-0.1187	-4.2934	-1.6394	4.7544	-2.5479	6.9068	7.6341	4.8885	-0.013	-2.2447	2.9893	3.3321	0.6608	-1.8836	-3.816	2.1734	-5.0116	-2.8262	-3.0469	4.3702	-0.5332	-1.6394	3.5839	9.0083	2.6647	-6.5064	-0.5756	-9.9658	-9.9658	-9.9658	-2.1779	-0.0425	-9.9658
GBM	TCGA-41-5651-01	4.44952	1.8242	-2.8262	-4.6082	-1.8314	5.3245	-3.1714	5.0401	3.1129	-1.9942	-1.2481	-2.6349	-9.9658	-9.9658	-9.9658	-0.7108	-1.6394	-1.0559	4.041	-5.0116	8.4209	6.7638	4.5503	-1.0559	0.6608	3.8954	3.8249	1.5165	-1.4699	-3.458	2.3135	-5.0116	-2.114	-3.6259	5.2438	1.1316	-0.8863	3.7571	9.2159	3.7432	-5.5735	1.7009	-9.9658	-9.9658	-4.6082	-2.5479	1.105	-9.9658
GBM	TCGA-06-0210-01	2.62994	0.3685	0.03	-2.8262	1.8404	7.3316	-1.7809	4.5964	5.17	-1.7809	0.434	-2.5479	-3.1714	-9.9658	-9.9658	-0.5543	-1.9942	-0.8084	5.6725	-2.1779	10.4933	7.752	5.634	-4.2934	1.0847	4.1604	4.9317	2.0776	-0.6643	-3.458	2.9784	-2.7274	0.7748	-0.4521	4.1343	1.5266	-1.2481	3.7259	8.1926	4.429	-3.6259	1.4011	-9.9658	-9.9658	-9.9658	2.0147	3.9838	-4.035
GBM	TCGA-19-5960-01	4.67073	1.3791	-9.9658	-2.5479	1.9712	6.9576	-0.8084	6.8914	3.2944	-2.3147	-2.6349	-1.7809	-1.2828	-5.0116	-9.9658	0.547	-1.0262	-0.2671	3.7324	-0.6873	4.6	5.9062	5.3331	-3.1714	0.4016	3.9412	4.5349	1.9073	-0.394	-3.0469	0.9343	-3.3076	-3.458	-1.2142	4.4496	2.3193	0.7493	3.2158	9.274	1.934	-2.4659	1.9034	-9.9658	-9.9658	-3.3076	-1.9379	2.3704	-9.9658
GBM	TCGA-06-0686-01	4.25475	1.5563	-1.9942	-3.1714	-1.0559	6.606	-2.8262	5.4676	3.8551	-2.3884	-0.8599	-9.9658	-9.9658	-9.9658	-9.9658	0.547	-0.6193	-0.0277	5.7431	-3.458	9.1749	7.5042	5.4983	-0.0574	-0.6873	3.5287	4.1103	1.2756	-1.3548	-2.3147	3.3577	-9.9658	-0.9686	-0.5125	4.7677	1.5064	-1.2828	4.1539	8.8478	4.1128	-5.0116	1.5998	-9.9658	-9.9658	-3.0469	-1.3183	2.791	-9.9658
GBM	TCGA-06-2563-01	3.89825	2.5313	-0.7346	-1.9942	2.3649	7.3292	-1.2481	6.2802	4.2103	2.7805	-0.1504	-1.9942	-2.1779	-9.9658	-3.1714	-0.1187	-2.114	-0.3201	5.4845	-1.3548	7.2495	7.5403	4.8294	-4.035	1.6093	5.0955	5.6622	2.6533	-0.8339	-2.3884	3.6474	-2.7274	-2.9324	-2.1779	5.1599	6.7657	2.9167	4.9426	8.8303	4.1788	-4.2934	1.7995	-9.9658	-9.9658	-3.0469	0.2277	2.9655	-9.9658
GBM	TCGA-15-1444-01	3.7463	1.6875	-2.114	-0.6416	1.2516	5.7788	-2.3884	8.2659	5.5886	-2.5479	1.0779	-2.3147	-9.9658	-5.0116	-9.9658	0.4125	-2.1779	-1.9379	5.8194	-2.7274	5.0939	7.7237	6.8841	-0.9971	-0.7588	4.9113	5.5198	1.6604	-1.2828	-3.1714	2.5462	-3.3076	-3.0469	-0.6873	4.9519	2.1213	-1.1488	5.0308	8.472	2.6441	-6.5064	2.3508	-9.9658	-9.9658	-9.9658	1.3623	5.4064	-9.9658
GBM	TCGA-32-4213-01	2.46989	0.24	-3.6259	-5.5735	-1.0262	5.5497	-3.1714	3.5035	3.162	1.1316	-0.2845	-5.5735	-1.4305	-9.9658	-9.9658	-1.2481	-3.6259	-1.2481	4.3917	-2.8262	5.1086	6.0348	4.9346	-4.2934	0.4016	3.3506	4.0445	2.2299	-0.3201	-2.9324	2.7336	-3.3076	-1.0559	-2.3884	3.8095	5.5895	2.7763	3.5312	6.7944	2.6019	-3.816	1.2516	-9.9658	-9.9658	-3.6259	-2.9324	0.0854	-9.9658
GBM	TCGA-15-0742-01	4.01971	1.2516	-2.4659	-6.5064	0.7579	7.1381	-1.9942	4.3751	2.9319	-1.7322	-1.2481	-1.7809	-1.1488	-5.5735	-5.5735	0.5069	-2.3147	-1.8314	5.0837	-3.6259	8.4939	8.2411	4.1547	-3.458	-0.8084	3.9356	3.4264	1.3901	-0.8084	-4.035	2.4701	-5.5735	-3.458	-3.1714	5.4087	2.6693	-1.2481	3.5461	8.2471	3.3364	-9.9658	1.8879	-3.458	-9.9658	-9.9658	-2.2447	1.196	-9.9658
GBM	TCGA-06-0187-01	3.64387	1.7141	-2.2447	-2.2447	1.2209	6.9452	-2.3147	6.569	4.2465	-1.0262	0.4552	-3.3076	-0.2498	-5.5735	-4.6082	-0.9132	-2.9324	-1.5951	5.3699	-3.3076	8.7434	7.5336	5.8822	-3.6259	-0.2498	4.9621	5.7843	2.8137	-2.6349	-1.685	2.5731	-5.5735	-0.8339	-1.0559	6.1991	5.1268	-0.6193	4.4509	8.1676	5.825	-9.9658	0.9642	-9.9658	-9.9658	-4.035	1.5902	5.2631	-9.9658
GBM	TCGA-19-1390-01	5.22691	1.8604	-1.2828	-4.2934	-0.1828	6.5378	-2.4659	6.2213	3.7699	-1.0862	-1.5522	-3.816	-9.9658	-9.9658	-9.9658	1.0642	-2.2447	-1.4305	4.5596	-3.816	10.7382	7.1435	4.6433	-1.5105	-3.458	4.7121	4.8329	0.058	-1.3183	-1.3183	1.2455	-5.5735	1.7575	-1.6394	5.1132	3.6148	0.1519	2.9469	9.5852	3.6983	-5.0116	1.9226	-9.9658	-5.0116	-2.4659	-0.9686	3.1145	-9.9658
GBM	TCGA-06-2557-01	3.73123	1.8801	-2.3147	-0.7588	0.5069	6.29	0.099	6.5178	5.812	2.108	1.9264	-3.1714	-3.0469	-4.2934	-5.5735	1.8282	0.5955	2.8034	5.8863	0.4761	5.1859	7.6866	6.7107	-3.0469	3.3521	5.2972	5.597	4.5392	2.4306	-0.1665	3.8925	-0.5973	-0.394	-0.4921	4.3198	5.4539	3.506	4.9265	8.7457	4.1178	-0.7346	3.0056	-9.9658	-9.9658	-2.2447	-0.1031	3.5887	-9.9658
GBM	TCGA-06-0878-01	3.62529	1.9452	-9.9658	-2.3884	1.642	7.8625	-0.7108	6.6671	5.0005	2.3423	0.2881	-1.685	-0.013	-9.9658	-9.9658	0.2642	-0.6873	-0.9686	5.72	-0.8599	9.904	7.4582	5.5053	-3.816	1.2209	4.8218	5.9656	4.2381	-0.9406	-0.5756	3.3717	-2.8262	0.5666	-1.5105	5.8138	4.8177	0.9568	4.4739	9.0342	6.6403	-2.9324	2.727	-9.9658	-9.9658	-9.9658	1.1897	5.8395	-9.9658
GBM	TCGA-06-0129-01	4.5904	2.0742	-2.4659	-3.6259	1.642	6.1246	-0.013	6.193	5.9468	-1.1488	0.8805	0.7407	-9.9658	-9.9658	-9.9658	3.38	-1.5105	1.8996	5.8357	-2.1779	4.6577	7.0066	6.4575	0.2881	1.0573	6.0378	5.4741	1.8524	-0.1828	-2.6349	2.8076	-4.035	-3.458	0.6239	4.1804	4.6479	0.5666	4.8535	9.4055	3.1393	-1.9379	2.2051	-9.9658	-9.9658	-9.9658	0.9268	4.6525	-9.9658
GBM	TCGA-16-1045-01	3.15706	1.7786	-1.4699	-0.8339	1.0983	6.3388	-0.6643	4.8885	5.6062	0.6517	3.1062	-9.9658	-9.9658	-4.035	-3.458	0.0014	-1.7322	0.5069	5.6496	-1.1172	8.546	7.3299	6.5836	-2.7274	2.1606	5.3165	6.24	3.1955	1.1117	-1.5522	3.7313	-1.7809	-0.8863	-1.5522	4.5832	3.695	2.9319	5.2664	8.1271	4.2196	-1.9942	3.8983	-9.9658	-9.9658	-4.6082	-0.7834	2.9052	-3.3076
GBM	TCGA-06-2567-01	4.60641	1.7532	0.1776	0.03	1.9712	6.0943	-1.4699	5.7931	5.2843	0.9115	1.7403	-2.2447	-9.9658	-1.2481	-1.0862	-0.1187	-2.7274	0.0014	5.6708	-0.2328	7.3838	7.5787	6.4308	-1.9942	2.8422	5.0242	5.7159	3.9673	0.4016	-2.5479	4.2833	-2.9324	0.4967	-1.2828	4.551	5.6183	1.2085	4.6035	8.1933	4.3392	-3.3076	2.1476	-9.9658	-9.9658	-9.9658	1.8363	4.5454	-9.9658
GBM	TCGA-32-2616-01	3.70156	1.196	-1.6394	-3.1714	1.5806	6.6165	-1.4699	5.0304	4.3068	-2.8262	0.3231	-3.6259	-3.3076	-5.5735	-9.9658	0.5271	-1.1488	0.9191	5.5823	0.1388	8.4176	8.3274	4.425	-1.3183	0.9038	4.3979	5.5874	2.4544	-0.2671	-1.4699	2.5388	-2.0529	-2.6349	-2.3147	4.7751	4.5602	-0.8339	4.3862	7.266	4.9208	-4.2934	2.3508	-9.9658	-9.9658	-9.9658	-0.5332	2.4279	-4.035
GBM	TCGA-06-0138-01	3.28096	1.0363	-1.8836	-2.1779	0.5069	6.1252	-3.3076	6.3236	4.6271	-1.4699	2.1147	-3.6259	-9.9658	-4.6082	-9.9658	0.3907	-0.9686	-0.2159	5.284	-1.1172	8.0477	7.1105	5.7926	-3.458	1.683	3.8239	4.4784	2.5707	-0.2845	-1.5522	3.1955	-2.7274	-1.9942	-1.6394	4.1433	4.359	0.7748	4.5243	8.1367	3.7836	-3.3076	1.8201	-9.9658	-9.9658	-9.9658	0.688	4.5342	-9.9658
GBM	TCGA-28-5208-01	4.04788	1.4652	-4.035	-1.7809	0.1519	7.0934	-1.9942	6.9612	4.7181	-0.2845	0.2522	-3.1714	-9.9658	-5.0116	-5.5735	-0.3566	-2.7274	0.1519	5.4307	-2.5479	5.1449	6.841	5.09	-0.394	1.0915	4.1883	4.8329	2.0183	-0.8339	-2.4659	3.6018	-4.035	1.6875	-2.0529	4.8207	3.8002	1.0363	4.5516	9.5404	3.3563	-4.2934	1.2576	-9.9658	-9.9658	-9.9658	-0.7346	1.884	-9.9658
GBM	TCGA-06-1804-01	4.09594	2.5731	1.1897	-6.5064	0.5859	6.2752	-1.685	7.4543	3.8075	-0.7346	-0.1345	-2.7274	-9.9658	-4.2934	-9.9658	-1.0559	-2.114	-1.4305	5.5361	0.6239	7.6185	7.3053	5.8523	-4.035	0.3115	4.66	5.3342	1.0363	0.5568	-4.035	2.8442	-3.816	-2.3884	-1.3183	4.322	2.8681	4.4719	3.9929	7.9353	2.0742	-5.0116	2.2573	-4.2934	-9.9658	-9.9658	-0.5756	2.8838	-9.9658
GBM	TCGA-14-2554-01	3.17314	0.7321	-2.9324	-0.013	0.5955	5.7634	-1.8836	6.0505	4.4074	-1.5951	1.196	-9.9658	-9.9658	-9.9658	-9.9658	-2.9324	-2.4659	-1.5951	4.4443	-3.6259	6.4413	6.5729	5.9378	-4.035	1.2271	3.0463	3.4424	2.409	-0.3201	-2.9324	2.3953	-3.3076	0.8961	-2.6349	4.4732	3.8411	-1.0559	3.9393	8.7852	4.1852	-3.6259	1.2696	-9.9658	-9.9658	-3.458	0.4447	3.863	-4.035
GBM	TCGA-27-2528-01	4.34341	1.2455	-4.6082	-2.1779	1.9452	6.7943	-5.5735	6.3586	2.3953	-4.6082	0.3796	-4.2934	0.3115	-5.0116	-9.9658	-2.114	-4.035	-2.4659	5.5589	-5.5735	8.0909	7.2317	3.9929	-5.0116	-1.3183	3.5887	4.579	1.4441	-2.6349	-2.2447	2.9262	-9.9658	-3.0469	-3.816	5.405	1.736	-0.013	4.314	9.2228	3.335	-9.9658	1.4441	-4.035	-9.9658	-9.9658	-1.5522	2.909	-9.9658
GBM	TCGA-06-5858-01	4.37642	1.3167	-3.816	-4.035	1.0983	7.2904	-2.4659	7.2739	5.1457	0.605	-1.2828	-3.458	-1.9942	-5.5735	-9.9658	0.4865	-2.9324	-1.0862	5.5015	-1.8314	9.2721	7.6673	5.5759	-1.0559	-0.7834	4.2929	6.1601	1.683	-0.8599	-2.2447	3.0995	-3.458	-9.9658	-0.8084	5.0479	3.4331	1.2333	5.3147	8.8962	3.5424	-4.6082	1.934	-2.9324	-9.9658	-9.9658	0.3346	3.7783	-9.9658
GBM	TCGA-06-0178-01	2.40868	0.099	-5.5735	-9.9658	-1.9942	5.2308	-3.3076	4.8115	4.6921	-1.7809	1.683	-3.1714	-2.5479	-9.9658	-5.5735	0.9191	-3.816	0.058	4.4996	-2.0529	2.9544	6.2514	4.6617	-2.4659	0.8883	3.6312	2.7763	2.0076	-0.3383	-1.7322	2.5948	-5.5735	-1.9942	-2.3147	3.8541	3.3364	0.1519	4.2877	7.6145	1.6512	-3.816	-0.2159	-9.9658	-9.9658	-9.9658	0.434	2.7508	-9.9658
GBM	TCGA-14-1823-01	2.3618	-0.0877	-3.816	-1.8836	0.2762	5.9385	-1.7809	5.445	5.1639	0.1519	1.6558	-9.9658	-2.8262	-4.035	-9.9658	-1.4305	-3.816	-0.2845	3.9892	-2.4659	6.4517	6.7444	5.8304	-3.816	2.0844	3.6972	5.0683	2.5363	-1.0262	-2.9324	2.667	-2.8262	-0.5973	-3.1714	4.178	3.9261	1.0503	3.9645	8.2647	4.6888	-1.8314	0.8647	-9.9658	-9.9658	-9.9658	1.2576	4.9012	-9.9658
GBM	TCGA-06-0743-01	2.97267	2.3423	-1.0262	-3.6259	0.6699	6.1353	-1.9379	6.5812	3.6172	-0.2671	-0.2845	-1.0262	0.5859	-4.035	-4.6082	0.346	-1.8314	-1.0559	5.6702	-1.4699	6.8819	7.4289	5.0229	-4.035	1.8036	3.2929	3.7888	2.6647	0.0158	-3.3076	2.6348	-1.9942	0.8568	-2.0529	4.6118	3.3061	1.0222	3.2796	8.3599	3.6148	-2.8262	2.0979	-9.9658	-9.9658	-3.3076	-0.2845	3.4881	-9.9658
GBMLGG	TCGA-19-1787-01	4.01793	1.0007	-0.7108	-1.7809	1.5709	7.0337	-1.3548	6.3565	4.9874	0.0014	-0.1993	-3.3076	-9.9658	-9.9658	-9.9658	2.1114	-1.3921	-0.1345	5.6404	-1.5522	5.5239	7.4073	5.5555	-0.2845	0.9642	3.2841	5.0875	3.242	0.537	-2.1779	3.868	-2.4659	-2.4659	-0.3201	5.4337	4.7088	0.8488	4.2064	8.2958	3.6635	-2.4659	2.4332	-9.9658	-9.9658	-5.0116	-0.0277	2.2051	-9.9658
GBMLGG	TCGA-S9-A7J2-01	3.06526	1.8484	-5.5735	-4.035	-0.8339	5.2765	-9.9658	7.437	2.2872	-3.6259	-2.4659	-2.3884	-9.9658	-5.0116	-9.9658	-0.0277	-5.0116	-4.2934	4.905	-2.4659	5.1371	7.5961	4.9561	-2.9324	-2.7274	4.1186	3.7773	-1.685	-0.4521	-3.6259	0.9343	-9.9658	-3.816	-6.5064	6.5509	-3.1714	-3.816	3.5199	8.8466	1.7954	-9.9658	-1.1811	-9.9658	-9.9658	-9.9658	-1.4699	3.7762	-9.9658
GBMLGG	TCGA-E1-A7YI-01	5.14774	2.4753	-4.2934	-3.6259	-2.0529	6.5236	-1.5951	3.8847	3.3605	-3.6259	-1.3921	-5.5735	-9.9658	-9.9658	-9.9658	1.9675	-2.1779	-3.3076	5.7767	-5.0116	6.5644	7.508	5.6171	-0.8339	-2.114	5.2913	5.741	0.688	-0.0877	-2.6349	1.2815	-3.458	0.6425	-2.8262	5.5426	1.2756	-0.9406	3.3032	9.9958	2.1247	-3.816	2.9224	-9.9658	-9.9658	-9.9658	-6.5064	-0.8863	-9.9658
GBMLGG	TCGA-06-5412-01	3.17474	1.766	-1.1172	-4.2934	4.1161	6.8514	-1.1172	4.3931	5.582	0.5763	2.2019	-4.2934	-2.9324	-2.6349	-1.9379	-1.5951	-1.4305	-0.3201	6.0921	-0.9132	7.1839	7.2904	6.6671	-2.3147	2.4144	4.1161	4.8973	2.7784	0.1648	-2.1779	4.0549	-2.5479	-0.6193	-0.8863	4.5173	4.034	2.1988	5.1823	8.1581	3.7888	-3.1714	3.0287	-9.9658	-9.9658	-5.0116	0.688	6.007	-9.9658
GBMLGG	TCGA-DU-7302-01	3.50462	1.4281	-1.2142	-4.035	0.2762	5.022	-3.458	6.1428	2.6895	-5.5735	-3.0469	-3.458	-9.9658	-9.9658	-9.9658	-1.9942	-6.5064	-3.6259	3.5682	-3.1714	4.5994	6.3422	5.464	-2.6349	-2.2447	4.7735	3.4752	-0.9132	-1.2142	-6.5064	1.7009	-9.9658	-9.9658	-3.3076	6.4801	-0.8339	-1.1488	3.4129	8.8106	1.8524	-6.5064	0.5955	-9.9658	-9.9658	-9.9658	-2.1779	0.6145	-9.9658
GBMLGG	TCGA-DU-A7TI-01	3.34771	1.5563	-0.5125	-2.5479	1.9564	5.1831	-0.9686	8.3675	4.9746	-1.9379	0.7058	-1.8836	-9.9658	-9.9658	-9.9658	1.5902	0.2154	-1.2481	5.599	-2.1779	5.4516	6.7385	6.1138	-1.2828	-2.4659	4.7603	5.073	1.2696	0.2642	-5.5735	2.4171	-4.6082	-1.5522	-0.2845	6.0284	4.3442	-1.7809	4.1153	8.6527	4.6502	-3.1714	2.0946	-3.816	-9.9658	-5.0116	1.683	6.523	-9.9658
GBMLGG	TCGA-12-5299-01	3.70711	-0.2671	-4.2934	-5.5735	2.1734	6.5863	-3.3076	5.9623	4.3999	2.9032	1.2147	-9.9658	-3.3076	-9.9658	-5.5735	-1.9379	-2.4659	-2.8262	5.0917	-4.2934	8.7227	7.4806	5.2983	-6.5064	-1.8836	4.3779	5.5075	1.614	-2.0529	-2.1779	2.0742	-5.5735	-2.3147	-2.7274	5.0308	6.4833	0.9642	3.7269	8.712	5.2983	-6.5064	0.6608	-9.9658	-9.9658	-9.9658	0.0854	3.4156	-9.9658
GBMLGG	TCGA-P5-A5EX-01	2.35614	1.9675	-2.9324	-3.1714	4.4101	6.0555	-0.9686	3.9318	4.0366	-1.0262	-0.4325	-3.816	-9.9658	-9.9658	-5.5735	0.0854	-0.8863	1.6875	5.1094	-0.3201	7.3486	7.6131	6.1363	-4.2934	3.2297	4.3709	5.2657	4.2743	2.2543	-1.5105	2.791	-1.5522	0.8082	-1.5522	5.7822	3.309	1.3956	3.4739	8.3174	5.4023	-2.5479	1.9188	-9.9658	-9.9658	-3.1714	-0.4131	3.3076	-9.9658
GBMLGG	TCGA-HT-8563-01	3.42359	1.5064	-2.7274	-1.685	3.449	7.8556	0.099	5.6876	6.2534	7.4984	3.0287	-3.1714	-9.9658	-3.0469	-0.9971	0.6145	0.5859	1.4652	5.6918	0.4233	5.9491	7.2742	6.9351	-0.9406	3.755	7.4258	8.3784	4.8635	2.5561	0.1124	4.0833	-1.0262	-0.9971	-0.4521	5.8692	5.4565	5.0361	5.079	7.7935	6.1463	-0.4719	2.8199	-9.9658	-9.9658	-2.2447	0.044	2.4883	-5.0116
GBMLGG	TCGA-FG-A60K-01	3.17634	1.4547	-2.6349	-5.5735	-1.4305	5.1425	-2.6349	7.4166	3.421	-3.1714	-1.4305	-2.5479	-9.9658	-5.5735	-9.9658	-1.2828	-4.6082	-2.3884	4.1211	-1.1811	4.7367	6.9777	5.9234	-3.0469	-1.9379	3.7138	3.97	0.6332	-0.8863	-3.816	1.0915	-9.9658	-9.9658	-4.2934	6.1115	-0.2159	-5.0116	3.7992	8.943	0.688	-6.5064	2.3019	-9.9658	-5.0116	-9.9658	-5.0116	-0.8339	-9.9658
GBMLGG	TCGA-06-2565-01	3.85603	2.4908	-0.6643	-1.9942	0.7146	7.3679	-1.685	6.9103	3.8279	-0.6193	0.4016	-0.3201	0.1388	-4.2934	-9.9658	2.036	-2.5479	1.8957	5.546	-2.8262	8.6915	6.7706	4.773	-2.6349	1.1833	5.0601	5.306	2.5087	-0.4131	-2.0529	3.0376	-1.2828	2.7205	-0.4131	5.0657	4.6358	1.8957	4.8269	9.2395	3.1844	-3.0469	1.0293	-9.9658	-9.9658	-3.458	-0.3566	3.1245	-9.9658
GBMLGG	TCGA-06-2561-01	3.45682	0.9716	-2.8262	-2.7274	1.334	6.3459	-0.4131	5.0584	4.9589	-3.3076	-0.5332	-2.6349	-9.9658	-9.9658	-9.9658	-0.1345	-0.9686	-1.0559	5.2208	-0.7588	6.6272	7.2249	6.0124	-5.5735	2.0844	3.6266	4.3834	3.1588	0.7832	-2.3884	3.402	-3.6259	-0.5756	-2.114	4.9093	4.1203	-1.3921	4.7555	8.5067	3.573	-2.3884	2.1378	-3.3076	-9.9658	-5.0116	-0.1187	3.5287	-9.9658
GBMLGG	TCGA-CS-5397-01	3.83388	0.6517	-4.035	-2.8262	1.5115	5.1478	-2.0529	6.5583	4.6422	-1.9379	-1.1488	-4.2934	-9.9658	-4.6082	-9.9658	-1.8314	-3.6259	-5.0116	4.5994	-4.035	3.9261	6.8224	6.1563	-5.5735	-0.7834	2.909	3.1939	1.0151	-1.4305	-2.3884	3.7378	-4.035	-2.4659	-2.3884	5.9081	0.9642	-0.5543	4.245	8.7789	2.7336	-5.5735	2.7615	-9.9658	-5.0116	-9.9658	-0.2845	3.2511	-9.9658
GBMLGG	TCGA-E1-5322-01	3.65307	0.6332	-3.0469	-2.6349	-0.5543	5.9798	-3.3076	7.5319	4.3876	-4.035	-1.5522	-5.0116	-9.9658	-9.9658	-9.9658	-0.7346	-1.6394	-3.816	5.1807	-3.3076	3.7518	7.3386	6.6337	-0.5973	-5.0116	3.83	4.3723	0.1903	-1.8314	-2.7274	1.8879	-6.5064	-3.458	-2.8262	5.9076	0.7146	-4.035	4.0366	8.8779	2.9319	-6.5064	1.105	-9.9658	-9.9658	-9.9658	-0.7588	3.9691	-9.9658
GBMLGG	TCGA-HT-8558-01	2.51099	1.5415	-2.3884	-5.5735	-0.0574	3.4635	-3.816	4.359	2.3508	-5.5735	-5.5735	-2.6349	-9.9658	-9.9658	-9.9658	-1.685	-4.6082	-3.3076	3.0825	-3.816	3.5887	6.3053	5.1227	-4.2934	-4.6082	2.0673	0.9191	-1.5951	-1.2828	-6.5064	1.4808	-5.5735	-4.6082	-6.5064	6.7609	-2.9324	-5.5735	2.5437	8.3511	0.8082	-5.5735	4.166	-9.9658	-3.6259	-9.9658	-2.7274	1.0079	-9.9658
GBMLGG	TCGA-S9-A6U8-01	2.63462	1.8722	-3.458	-2.3147	0.7233	5.3417	-2.114	7.8382	4.9203	-9.9658	-0.8339	-2.3147	-9.9658	-9.9658	-9.9658	-0.2845	-6.5064	-4.035	5.9444	-1.4699	3.6347	7.3691	6.5756	-1.8314	-2.9324	2.9893	3.1507	-0.1031	-0.4921	-4.2934	1.9822	-5.5735	-4.035	-6.5064	5.2698	-0.7834	-2.7274	4.429	8.9048	2.4144	-6.5064	2.3048	-9.9658	-9.9658	-9.9658	-1.3921	2.0742	-9.9658
GBMLGG	TCGA-HT-7854-01	2.48803	-0.1345	-0.7346	-3.3076	1.2756	4.6938	-2.6349	7.563	4.7198	-9.9658	0.434	-3.0469	-9.9658	-9.9658	-9.9658	-1.1172	-1.2142	-2.3147	5.5817	-2.7274	5.4363	6.9702	7.2669	-5.0116	-0.8339	3.5559	4.3285	1.3679	-2.0529	-3.1714	2.8681	-3.0469	-2.3147	-1.3548	6.9904	1.8036	-1.1488	4.1962	8.7736	5.3562	-6.5064	3.074	-9.9658	-9.9658	-9.9658	2.6278	6.0479	-9.9658
GBMLGG	TCGA-HT-7467-01	2.91265	1.6466	-3.1714	-5.0116	-0.8863	4.0091	-2.6349	5.392	2.4571	-4.6082	-1.685	-3.3076	-9.9658	-9.9658	-4.035	-1.3921	-5.5735	-3.1714	3.3336	-3.458	4.0144	6.3768	5.5988	-3.3076	-1.9942	3.4224	3.6148	0.346	-1.4305	-6.5064	1.614	-4.2934	-4.2934	-5.0116	5.4608	-0.5756	-0.5973	3.0671	8.397	0.7748	-6.5064	4.2373	-9.9658	-3.6259	-4.2934	-2.3884	-1.4699	-9.9658
GBMLGG	TCGA-HT-7874-01	2.97818	1.2394	-1.5522	-3.816	0.0854	4.1011	-3.458	6.04	2.1444	-9.9658	-3.6259	-4.035	-9.9658	-9.9658	-9.9658	-1.1488	-6.5064	-4.2934	2.9224	-0.5125	3.8798	6.3745	6.2283	-3.816	-2.5479	3.2915	3.2692	-0.4131	-1.4699	-9.9658	1.9149	-5.5735	-5.0116	-5.5735	5.9814	-2.3147	-2.9324	3.2647	8.4303	1.5465	-6.5064	2.791	-9.9658	-9.9658	-9.9658	-1.9379	2.3677	-9.9658
GBMLGG	TCGA-S9-A6TV-01	3.12266	2.1013	-4.2934	-3.6259	3.1409	6.7018	-2.8262	5.9458	4.6759	4.5988	0.9568	-1.5522	-9.9658	-2.9324	-2.4659	0.8082	-3.0469	0.5069	5.2902	-1.6394	8.1683	7.8212	6.0481	-1.5105	2.727	5.6617	6.8102	1.6875	-0.394	-2.0529	2.7095	-3.816	-1.2828	-0.8863	6.6518	4.6888	0.9642	3.6172	9.4107	5.9308	-4.035	2.4359	-9.9658	-9.9658	-4.035	-0.0277	3.8218	-9.9658
GBMLGG	TCGA-VM-A8CD-01	4.12015	0.5955	-3.3076	-2.1779	2.409	6.4244	-2.5479	4.9901	4.6685	-1.0262	-0.5543	-1.7809	-2.6349	-9.9658	-6.5064	0.4657	-0.7108	-2.7274	4.8455	-4.035	5.4273	7.8477	6.1148	-4.2934	-0.5125	3.5149	4.0901	1.5013	-1.7322	-4.2934	1.9564	-4.6082	-1.5522	-1.4699	5.7895	6.286	1.9377	3.5851	7.8006	3.7443	-4.6082	2.9857	-1.4305	-9.9658	-5.5735	-0.7588	3.6312	-4.2934
GBMLGG	TCGA-06-0132-01	2.49057	1.2875	-1.2142	-1.7322	0.4761	5.4512	-2.114	4.9317	5.9329	1.2455	2.4117	-9.9658	-2.2447	-9.9658	-9.9658	-0.9132	-1.7809	-0.5332	5.3519	-2.1779	5.5528	7.1927	6.7292	-3.816	1.5514	4.0287	3.8944	4.0295	0.537	-0.9132	2.7139	-1.9942	-0.0277	-2.114	4.6352	4.0593	2.3926	4.2601	7.7418	4.3611	-3.458	3.0723	-9.9658	-9.9658	-9.9658	0.3231	3.833	-9.9658
GBMLGG	TCGA-HT-7616-01	2.99635	1.7828	-1.9942	-0.6873	1.0983	5.1044	0.2881	4.9951	3.186	1.7229	2.8076	-9.9658	-9.9658	-5.5735	-4.2934	3.7269	-0.4325	2.6738	3.4791	0.8082	5.4363	6.4276	6.0756	-2.4659	3.2796	5.1603	5.797	4.497	2.8701	-0.2671	2.8522	-0.8863	-1.4305	-0.6193	4.6491	2.8301	4.4608	3.8798	8.1829	2.7249	-0.5973	0.0854	-9.9658	-9.9658	-5.0116	-3.816	1.0222	-3.458
GBMLGG	TCGA-KT-A7W1-01	4.68648	2.2753	-9.9658	-3.0469	1.5013	7.2596	-1.9379	7.7517	2.7487	3.928	-2.1779	-0.0877	-1.3548	-9.9658	-9.9658	-0.2845	-0.7346	-1.7809	5.2877	-2.3147	6.206	7.1677	4.6023	-3.3076	1.334	5.2381	5.3027	2.8422	-0.2671	-2.9324	1.46	-2.1779	-2.8262	-2.7274	5.0532	6.7554	1.2516	3.8431	9.3726	3.9801	-2.9324	2.0776	-3.816	-3.6259	-5.0116	-3.6259	2.1411	-3.458
GBMLGG	TCGA-P5-A5F2-01	3.09596	0.9191	-5.5735	-5.5735	0.24	4.4047	-5.5735	5.9021	2.0569	-5.5735	-1.4305	-4.2934	-9.9658	-5.0116	-9.9658	-1.2481	-5.5735	-4.035	3.8228	-3.6259	4.6077	7.3775	6.1916	-2.9324	-3.458	3.2737	4.2714	-0.9686	-1.1172	-9.9658	0.7058	-9.9658	-9.9658	-6.5064	5.3555	-4.035	-3.458	2.8582	8.4941	1.4228	-5.0116	0.4967	-9.9658	-9.9658	-9.9658	-1.1172	3.5449	-9.9658
GBMLGG	TCGA-19-2629-01	4.0152	1.0503	-9.9658	-3.816	-0.2498	6.48	-1.7322	7.0637	5.291	-0.2328	0.1648	-2.9324	-9.9658	-9.9658	-9.9658	0.7916	-1.8314	-0.5756	5.7517	-1.3183	4.576	7.368	6.79	-0.3383	1.0222	4.5192	5.434	3.4156	-0.1993	-2.7274	2.5263	-3.816	-2.1779	-2.5479	6.477	3.2466	0.3573	4.0488	8.5438	2.081	-3.816	2.4465	-9.9658	-9.9658	-9.9658	-1.8314	3.0446	-9.9658
GBMLGG	TCGA-HT-7607-01	3.36459	1.4704	-2.5479	-4.035	0.2998	4.2434	-1.9379	6.8631	2.8402	-9.9658	-0.6873	-2.9324	-9.9658	-9.9658	-9.9658	-2.114	-5.0116	-2.3884	3.1212	-1.6394	4.2906	6.5878	5.5546	-3.1714	-1.6394	3.453	4.2419	1.2209	-1.3183	-3.458	2.2268	-5.0116	-9.9658	-4.6082	6.1485	2.1476	-1.685	3.0376	8.4759	3.3717	-4.2934	2.828	-9.9658	-5.5735	-9.9658	-1.7809	1.9859	-9.9658
GBMLGG	TCGA-06-0238-01	3.11265	0.2154	-2.1779	-1.4699	-0.5973	5.6436	-1.7809	5.4851	4.9472	-0.5332	1.3956	-2.7274	-9.9658	-4.6082	-5.5735	0.0718	1.2576	-0.394	4.6554	-1.2142	5.4353	6.5817	5.2032	-0.1828	2.0289	3.5486	4.1684	2.3366	-0.1187	-1.9942	2.8034	-3.3076	-0.1031	-0.5543	3.9431	4.6142	0.7058	4.1716	8.8985	2.667	-2.7274	1.9527	-9.9658	-9.9658	-3.1714	-0.0574	3.5324	-9.9658
GBMLGG	TCGA-HT-7873-01	3.47383	1.8323	-0.8863	-1.1811	0.3231	5.5021	-1.685	7.6042	4.2669	-9.9658	-1.6394	-2.7274	-9.9658	-9.9658	-9.9658	0.7146	-4.6082	-5.5735	5.1014	-2.4659	4.9031	6.8564	6.6618	-3.1714	-9.9658	3.5111	3.0252	-0.6416	-0.2671	-5.5735	1.6093	-9.9658	-9.9658	-5.5735	5.5018	-2.6349	-9.9658	4.1359	9.0967	1.9564	-9.9658	1.9264	-9.9658	-5.0116	-9.9658	-0.1993	0.5763	-9.9658
GBMLGG	TCGA-06-0749-01	2.86394	0.9191	-0.8084	-4.2934	0.3796	5.7658	-2.2447	5.4327	5.2285	-3.6259	0.9789	-5.5735	-2.3884	-9.9658	-9.9658	0.3573	-1.2828	-0.7834	5.7864	-2.3884	3.9478	8.0884	6.2048	-4.2934	0.1776	3.2328	3.7593	2.6371	-0.7588	-4.2934	2.6232	-3.0469	-0.4521	-1.5105	4.3709	2.3677	-2.7274	3.7324	7.8224	2.6533	-4.035	1.7009	-3.1714	-9.9658	-9.9658	0.8883	1.9302	-9.9658
GBMLGG	TCGA-HT-7603-01	2.11103	0.8726	-2.114	-4.035	0.4552	3.927	-3.6259	7.005	2.4779	-9.9658	-5.0116	-3.6259	-9.9658	-6.5064	-9.9658	-2.8262	-9.9658	-4.2934	3.3689	-4.035	2.6019	6.872	5.6744	-2.2447	-2.7274	2.4332	4.1145	-1.3921	-1.7809	-5.0116	1.0711	-9.9658	-2.7274	-9.9658	5.7342	-5.5735	-6.5064	2.6579	8.5803	0.3796	-9.9658	1.1117	-9.9658	-9.9658	-9.9658	-2.9324	-0.9406	-9.9658
GBMLGG	TCGA-DB-A64P-01	3.31322	1.4388	-4.6082	-9.9658	-0.8599	4.9883	-1.6394	6.948	2.6647	-0.7834	-0.6416	-3.0469	-9.9658	-9.9658	-9.9658	-0.8084	-2.5479	-1.4699	3.87	-2.2447	4.0994	7.0047	5.6756	-1.8836	-0.8339	3.794	1.0915	0.7916	-1.8836	-3.816	1.5661	-9.9658	-4.6082	-3.0469	6.5753	0.099	-0.1187	3.2112	8.9447	1.8078	-6.5064	0.8488	-4.6082	-9.9658	-9.9658	-2.1779	1.8722	-9.9658
GBMLGG	TCGA-06-0174-01	4.61476	1.5854	-2.4659	-4.035	-0.7834	6.8884	-3.458	6.2599	4.0816	-2.2447	-0.1504	-4.2934	-9.9658	-4.2934	-4.2934	0.24	-2.8262	-1.5522	5.2315	-5.0116	9.5883	7.1675	4.9603	-1.5105	-1.2481	3.7825	3.9365	1.3109	-1.6394	-1.9942	2.9432	-9.9658	-0.9971	-2.114	4.5142	1.2209	-1.7809	4.3017	9.2841	2.4144	-5.0116	1.0151	-9.9658	-9.9658	-9.9658	-1.0862	1.3791	-9.9658
GBMLGG	TCGA-HW-7486-01	3.09427	1.0363	-4.6082	-4.6082	-0.1345	4.7898	-2.6349	7.2584	3.9792	-9.9658	-0.8084	-9.9658	-9.9658	-9.9658	-5.0116	-1.1488	-5.0116	-3.1714	4.0567	-0.5973	2.7117	6.6002	6.0378	-1.685	-2.1779	4.0331	4.504	0.7664	-1.1488	-4.035	1.8201	-9.9658	-5.0116	-3.458	5.5392	0.8488	-2.3884	3.603	8.8277	1.5902	-6.5064	4.0722	-9.9658	-9.9658	-9.9658	-1.685	0.0854	-9.9658
GBMLGG	TCGA-P5-A5F1-01	2.63462	2.108	-3.1714	-2.3884	-0.4325	4.4951	-2.3884	8.2824	3.1011	-2.5479	-0.8339	-4.2934	-9.9658	-5.5735	-9.9658	-0.3566	-3.458	-1.3921	4.7192	-2.5479	4.3133	8.2194	6.3856	-3.3076	0.4761	3.0481	4.1458	2.2753	-1.3183	-5.0116	1.6512	-4.6082	-1.9942	-2.6349	5.2634	1.1184	-0.1665	3.2766	8.6689	2.5731	-4.6082	0.9493	-9.9658	-9.9658	-9.9658	-2.3884	2.0325	-9.9658
GBMLGG	TCGA-DU-7011-01	2.06001	1.8119	-4.6082	-0.5332	0.2881	4.6977	-1.7322	8.6238	4.4277	-2.0529	0.3115	-4.035	-9.9658	-5.0116	-9.9658	-1.9379	-4.035	-1.2142	4.3449	-1.3548	3.4075	6.8005	6.3889	-2.6349	-1.1172	3.453	3.9289	1.0642	-1.4305	-3.0469	2.6418	-4.6082	-5.5735	-3.0469	5.6761	1.949	1.6649	4.1036	8.5315	2.694	-5.5735	1.2815	-9.9658	-9.9658	-9.9658	0.346	3.9156	-9.9658
GBMLGG	TCGA-P5-A77X-01	3.04618	1.6466	-3.458	-6.5064	-0.6873	4.1852	-1.2481	6.2466	1.4859	-9.9658	-2.7274	-4.035	-9.9658	-5.5735	-9.9658	-0.8599	-5.0116	-3.458	2.5924	-1.5105	4.8475	6.791	4.3841	-4.6082	-1.3921	3.9654	4.2001	-0.9132	-0.7346	-5.5735	0.7233	-4.6082	-5.0116	-9.9658	4.9346	-3.458	-4.6082	3.0181	8.7753	0.099	-9.9658	0.679	-9.9658	-9.9658	-9.9658	-2.6349	-1.1488	-9.9658
GBMLGG	TCGA-HW-7493-01	3.31905	1.2756	-4.035	-0.3752	0.8647	4.6439	-1.7322	8.6618	3.9728	-3.6259	0.8327	-9.9658	-9.9658	-9.9658	-5.5735	-1.9379	-3.3076	-0.5332	4.6697	-0.6416	3.668	7.05	6.0892	-2.9324	1.2333	3.4437	3.9983	2.236	-0.6416	-2.2447	1.9226	-5.5735	-9.9658	-4.2934	5.5289	2.0707	0.2154	4.1061	8.7638	3.6172	-9.9658	1.6558	-3.6259	-9.9658	-9.9658	1.7053	5.9616	-9.9658
GBMLGG	TCGA-VM-A8CA-01	2.30454	2.236	-2.3147	-5.0116	0.2522	4.1351	-3.816	5.026	2.9469	-9.9658	-3.458	-9.9658	-9.9658	-4.035	-4.6082	-1.1172	-6.5064	-3.458	4.7458	-1.4699	2.4571	7.7281	6.4233	-3.816	0.2522	2.6232	3.453	1.1833	-1.685	-4.2934	2.4225	-5.5735	-2.9324	-4.6082	5.298	-0.2159	-6.5064	2.8321	8.3254	2.4008	-9.9658	0.6699	-9.9658	-9.9658	-5.5735	-0.6416	4.0926	-9.9658
GBMLGG	TCGA-DU-7015-01	2.73769	0.9642	-2.4659	-3.6259	0.434	5.0313	-3.6259	8.0194	5.0313	-1.3183	0.346	-3.816	-9.9658	-4.6082	-9.9658	-1.0862	-3.458	0.9935	4.5342	-2.1779	3.2313	6.5771	6.7415	-2.2447	0.8726	4.0688	4.8822	2.0638	0.8961	-3.816	2.8462	-3.816	-3.6259	-3.816	5.3576	1.4065	1.46	4.5217	8.926	3.0145	-4.2934	0.3573	-9.9658	-9.9658	-9.9658	-0.6193	1.7575	-9.9658
GBMLGG	TCGA-TM-A7C5-01	2.9891	1.196	-2.9324	-5.5735	-2.114	4.1482	-3.6259	4.431	1.3051	-3.458	-2.8262	-9.9658	-9.9658	-5.5735	-5.5735	-0.9406	-3.816	-0.8599	2.3898	-3.3076	4.9279	6.4936	4.4203	-1.8836	-2.2447	3.2677	2.7572	0.7233	-2.1779	-4.2934	0.8164	-4.6082	-9.9658	-9.9658	5.3331	-1.2481	-1.6394	2.8158	8.7022	0.547	-5.0116	-0.1993	-9.9658	-9.9658	-9.9658	-3.458	3.5174	-9.9658
GBMLGG	TCGA-DU-8162-01	3.17154	1.3225	-1.0862	-4.6082	1.1577	4.6218	-2.0529	6.0547	3.2112	-4.2934	-1.6394	-3.6259	-9.9658	-5.5735	-9.9658	-2.4659	-4.2934	-3.3076	3.9204	-3.6259	4.996	6.4749	5.1708	-3.816	-2.3147	3.1653	2.826	0.1257	-1.5951	-3.458	1.6281	-4.6082	-9.9658	-4.2934	5.8212	-0.7346	-2.5479	3.5461	8.4217	2.7227	-9.9658	3.4277	-5.5735	-9.9658	-9.9658	1.0007	5.2346	-9.9658
GBMLGG	TCGA-TM-A84O-01	2.85997	1.9931	-9.9658	-6.5064	-1.2481	5.1708	-3.458	6.3627	3.0568	-9.9658	-0.9406	-4.6082	-2.2447	-9.9658	-5.5735	-0.3383	-4.2934	-0.394	4.38	0.03	5.061	7.6177	4.6439	-1.7322	-0.1665	4.1931	4.447	1.5661	0.537	-3.816	2.081	-3.816	-1.8314	-3.458	6.6558	0.2881	-2.5479	3.5374	8.8221	2.872	-6.5064	0.2881	-9.9658	-9.9658	-9.9658	-1.5951	0.5859	-9.9658
GBMLGG	TCGA-06-5410-01	2.52354	1.5366	-2.3147	-2.1779	1.334	6.5557	-0.1993	3.4237	6.3724	0.5069	3.7678	-5.5735	-9.9658	-4.2934	-4.6082	-1.1811	-0.7346	0.2998	6.1131	-2.9324	5.8687	7.0071	7.2492	-3.6259	1.8564	3.9147	4.5886	4.5148	0.099	-0.7346	4.1376	-3.458	1.105	-0.1993	4.0287	2.2513	-0.0425	5.1268	8.0324	5.4751	-2.6349	2.5996	-9.9658	-9.9658	-9.9658	1.9931	5.6916	-9.9658
GBMLGG	TCGA-S9-A7R3-01	2.74414	1.4547	-2.2447	-0.8084	0.6969	4.7138	-2.7274	7.3442	3.9118	-9.9658	-0.9406	-3.6259	-9.9658	-9.9658	-9.9658	-0.0877	-5.5735	-4.2934	5.0484	-1.3921	3.7794	7.5245	6.8262	-1.3921	-0.7834	4.0216	3.6725	0.5568	-1.4699	-5.0116	1.2455	-4.6082	-9.9658	-4.2934	4.1587	-1.7322	-2.6349	3.9232	8.6956	1.8604	-9.9658	0.4233	-4.6082	-9.9658	-5.0116	-2.5479	2.118	-9.9658
GBMLGG	TCGA-TQ-A7RN-01	3.20003	1.4228	-2.0529	-3.1714	-1.1488	5.0308	-3.816	7.2104	2.3222	-9.9658	-3.0469	-2.0529	-9.9658	-5.5735	-9.9658	-0.3022	-4.035	-4.035	4.1203	-1.2828	4.2258	7.49	5.623	-2.3147	-5.0116	4.4913	4.4095	-1.5522	-0.7108	-4.2934	0.7664	-9.9658	-9.9658	-4.035	6.7714	-1.7322	-1.7809	3.1245	8.7782	0.9191	-9.9658	0.9038	-9.9658	-9.9658	-9.9658	-3.1714	2.7007	-9.9658
GBMLGG	TCGA-28-2513-01	3.27648	1.4756	-2.2447	-0.7108	1.9149	7.1466	-1.3921	6.0949	5.2668	5.6375	0.8082	-4.6082	-2.1779	-5.0116	-5.5735	-0.3383	-0.7588	-0.4921	6.0007	-1.1811	7.5767	7.0013	6.4838	-2.8262	1.5902	4.0935	4.691	2.6984	0.537	-1.9942	3.652	-2.0529	2.4117	-1.8836	5.119	6.9863	3.2572	4.8876	8.2997	4.8958	-1.8314	1.5998	-9.9658	-9.9658	-9.9658	0.1124	2.4518	-9.9658
GBMLGG	TCGA-DU-A6S6-01	2.88554	2.128	-3.816	-5.5735	-1.0559	4.9308	-3.3076	6.3707	1.0847	-3.3076	-1.7809	-2.9324	-9.9658	-5.5735	-5.5735	-0.8084	-5.5735	-4.035	3.9327	-2.4659	4.4713	7.026	5.3772	-0.3201	-2.9324	3.8421	3.6838	-1.3921	-0.8599	-4.035	0.9419	-9.9658	-3.458	-9.9658	6.5264	-2.6349	-5.5735	2.7679	8.8293	1.1641	-9.9658	0.1776	-9.9658	-9.9658	-9.9658	-2.3147	1.9226	-9.9658
GBMLGG	TCGA-P5-A735-01	2.72469	2.1378	-3.1714	-4.2934	-0.8599	5.4266	-1.4305	7.0337	3.4318	-9.9658	-1.1488	-2.2447	-2.7274	-9.9658	-9.9658	-0.6873	-4.6082	-3.816	5.0295	-2.6349	3.1653	7.4798	6.2026	-2.3147	-4.2934	2.9637	3.5754	-2.114	-1.0262	-9.9658	1.2696	-9.9658	-9.9658	-6.5064	6.1467	-3.816	-4.6082	3.1294	9.125	0.7146	-9.9658	2.1345	-9.9658	-9.9658	-9.9658	-2.1779	-0.0877	-9.9658
GBMLGG	TCGA-HT-7691-01	2.75487	0.6699	-2.2447	-4.035	0.8488	4.6747	-2.5479	6.5181	4.2373	-0.5756	0.7407	-5.5735	-9.9658	-9.9658	-9.9658	-2.2447	-0.1504	-2.8262	4.8704	-1.1811	4.3242	7.8819	7.8419	-4.2934	-0.4921	3.8739	4.0549	1.5064	-1.5105	-3.816	3.091	-2.6349	-1.0862	-1.7809	4.445	-0.9686	-1.9942	3.8944	8.6464	3.6916	-4.2934	3.1393	-9.9658	-9.9658	-5.5735	1.2934	6.3663	-9.9658
GBMLGG	TCGA-FG-A6J1-01	2.63462	2.0535	-2.6349	-4.035	-1.5522	5.3027	-1.4305	5.2791	2.7357	-2.8262	-3.458	-3.6259	-9.9658	-9.9658	-9.9658	0.6425	-2.2447	-3.816	4.5398	-1.9379	2.6185	8.0243	5.991	-2.4659	-0.3752	2.1541	3.5086	1.7097	-0.4921	-4.6082	1.1382	-6.5064	-5.0116	-5.0116	5.3352	-1.5522	-4.035	2.9186	8.0859	1.412	-4.6082	1.334	-9.9658	-9.9658	-9.9658	-2.2447	1.8604	-9.9658
GBMLGG	TCGA-S9-A7R7-01	2.73123	2.1894	-2.6349	-1.7809	0.4865	6.5638	-0.1828	7.2483	4.9184	-1.3921	0.2522	-2.114	-9.9658	-9.9658	-3.1714	-0.9971	-3.3076	-1.9942	5.9771	-1.9942	4.1836	7.6827	6.9896	-2.1779	0.5763	5.2969	6.2852	2.2051	0.2154	-2.7274	2.5828	-3.0469	-9.9658	-1.9379	5.2574	1.6281	0.2154	4.585	8.6349	4.97	-4.2934	2.8321	-9.9658	-9.9658	-9.9658	-0.2845	1.934	-3.3076
GBMLGG	TCGA-76-4929-01	3.55093	0.605	-3.816	-2.3147	0.4657	6.1287	-2.3147	4.9482	4.3413	-2.1779	0.1903	-5.0116	-9.9658	-5.0116	-5.0116	0.4233	-2.4659	-1.5105	4.8915	-2.8262	8.3926	7.2411	5.978	-1.7809	-0.9132	5.026	6.0047	3.8401	-1.4305	-1.4305	2.8361	-4.2934	-0.5756	-3.0469	5.0781	3.3717	-2.0529	3.3869	7.7886	3.5633	-5.5735	1.2023	-9.9658	-9.9658	-4.6082	0.1124	2.7487	-9.9658
GBMLGG	TCGA-DU-6402-01	3.59931	1.1447	-3.1714	-3.0469	3.6405	7.7897	-2.0529	5.8919	3.9965	0.03	-0.6643	-6.5064	-3.458	-9.9658	-4.6082	0.0158	-0.2159	-0.7346	5.9388	-1.3921	7.1857	7.1479	5.5059	-4.035	2.6395	3.6089	5.0423	3.944	1.8564	-1.9379	2.5876	-1.3921	4.3541	-3.6259	5.7512	2.945	2.0147	4.1875	8.5516	4.9251	-2.0529	2.1411	-9.9658	-9.9658	-3.6259	-0.0574	2.2783	-3.3076
GBMLGG	TCGA-HT-7684-01	1.38957	0.517	-3.3076	-4.035	-0.9686	4.1506	-6.5064	5.0824	3.3506	-9.9658	-2.3884	-9.9658	-9.9658	-6.5064	-6.5064	-2.0529	-2.2447	-5.5735	4.4223	-5.0116	4.4483	8.1137	6.3237	-4.2934	-3.458	1.4228	2.3394	0.099	-1.7809	-5.5735	1.9377	-9.9658	-2.5479	-9.9658	5.8627	-3.1714	-3.816	2.0569	8.0079	4.4861	-9.9658	0.3115	-9.9658	-5.5735	-9.9658	-3.1714	1.7097	-9.9658
GBMLGG	TCGA-HT-8104-01	4.218	2.3222	-2.3884	-1.685	1.7828	6.3853	-2.4659	7.7798	4.2548	0.1903	-1.0559	-4.6082	-1.1811	-9.9658	-5.5735	-2.3147	-2.9324	-1.8314	4.8069	-2.0529	5.7522	6.4769	5.6654	-1.685	0.3573	4.6358	5.684	2.3251	-1.3183	-3.6259	2.0289	-3.458	0.3115	-2.2447	6.4816	4.0304	1.8119	4.4183	9.4032	4.6753	-4.6082	2.3536	-9.9658	-9.9658	-4.2934	0.2154	2.7826	-9.9658
GBMLGG	TCGA-FN-7833-01	2.99462	1.412	-5.5735	-0.2671	2.3394	5.6625	-0.8599	7.5576	5.1148	-1.5951	2.4544	-1.8314	-2.9324	-9.9658	-4.6082	1.9527	-0.7834	-1.9379	5.3147	-2.8262	4.6259	7.0633	6.9954	-2.5479	-0.8339	5.0444	4.7576	2.1147	-1.3921	-1.9379	3.1311	-5.5735	-3.1714	0.6332	5.8402	4.7549	-1.5951	4.1644	8.8816	3.6849	-4.035	-0.2328	-9.9658	-9.9658	-9.9658	0.5568	6.0555	-5.0116
GBMLGG	TCGA-HT-7473-01	2.62994	1.0779	-1.7809	1.196	1.196	5.2788	-1.3183	8.7887	5.225	-2.7274	1.3109	-5.5735	-9.9658	-9.9658	-9.9658	-0.7346	-1.4699	0.605	5.3709	-1.0262	3.5875	6.8841	7.0519	-2.2447	1.2147	4.1587	5.9093	2.7249	0.2277	-2.4659	2.3451	-3.458	-5.0116	-2.5479	5.4624	2.3508	-0.7588	4.4169	8.9677	4.2048	-2.9324	1.683	-9.9658	-9.9658	-9.9658	0.2642	2.2175	-4.035
GBMLGG	TCGA-06-0645-01	3.06006	1.6558	-1.1811	-3.1714	1.8119	6.5908	-1.2828	5.093	6.0635	0.1903	3.4674	-2.1779	-2.2447	-9.9658	-9.9658	0.3685	-0.9686	0.2522	6.3023	-2.1779	8.532	7.0543	6.3592	-4.035	1.1447	4.2563	5.1692	3.0602	-0.2328	-0.4521	4.0401	-4.2934	2.0289	-0.4719	5.6346	4.7746	0.9862	4.6899	8.3306	6.3662	-2.9324	3.0602	-9.9658	-9.9658	-9.9658	1.8879	5.8367	-9.9658
GBMLGG	TCGA-HT-8019-01	2.23879	1.4859	-2.2447	-6.5064	-0.4131	3.3364	-2.9324	4.3292	1.3791	-9.9658	-6.5064	-2.0529	-9.9658	-9.9658	-9.9658	-1.3548	-3.0469	-5.5735	2.694	-3.816	3.6827	6.6163	5.3352	-3.458	-1.9379	1.8564	1.4911	-2.114	-1.0559	-4.6082	1.5998	-9.9658	-9.9658	-5.5735	6.1819	-2.3884	-5.0116	2.4805	7.5336	-0.0725	-6.5064	1.1706	-4.2934	-9.9658	-5.5735	-3.1714	0.4865	-9.9658
GBMLGG	TCGA-TQ-A7RU-01	3.80945	2.9375	-5.5735	-6.5064	-1.9379	5.2388	-5.5735	5.3968	1.5064	-3.1714	-4.035	-3.1714	-9.9658	-5.5735	-9.9658	0.0854	-4.6082	-0.5543	4.0091	-2.0529	4.867	7.0879	4.1994	-2.114	-0.6643	3.3076	3.034	0.679	0.0014	-2.5479	1.1897	-4.6082	-4.6082	-9.9658	5.6708	-1.0559	-1.5522	3.2297	8.8979	0.7664	-9.9658	0.2998	-9.9658	-9.9658	-9.9658	-5.0116	-0.9406	-9.9658
GBMLGG	TCGA-DB-A4XF-01	2.88753	1.0847	-3.816	-2.6349	1.0293	5.0713	-4.2934	7.0947	3.3731	-4.035	-3.0469	-3.458	-9.9658	-9.9658	-9.9658	-1.4305	-3.816	-4.6082	4.5485	-2.3884	3.2435	7.1228	6.2283	-0.9971	-0.9971	4.3744	5.0794	-0.1993	-1.4699	-6.5064	1.2636	-4.6082	-9.9658	-9.9658	6.0734	-2.0529	-1.3921	3.1908	8.9046	2.0535	-5.0116	0.7321	-3.816	-9.9658	-9.9658	-5.5735	-0.7108	-9.9658
GBMLGG	TCGA-FG-A713-01	2.68928	1.6093	-1.8314	-4.035	-1.0862	3.9365	-2.6349	5.243	1.7053	-2.8262	-3.3076	-2.5479	-9.9658	-9.9658	-9.9658	-1.5951	-5.0116	-6.5064	3.4061	-2.3147	4.1676	6.7608	5.5629	-3.458	-2.9324	2.362	2.05	-0.5125	-2.5479	-3.6259	1.5563	-9.9658	-9.9658	-9.9658	6.4927	-1.9379	-2.9324	2.3337	8.0886	1.2085	-9.9658	2.7095	-3.6259	-9.9658	-9.9658	-6.5064	-1.4305	-9.9658
GBMLGG	TCGA-E1-A7YL-01	3.79905	1.4808	-4.6082	-2.4659	0.7146	6.1611	0.5859	4.4861	4.5711	-2.0529	0.6608	-2.8262	-9.9658	-5.5735	-5.5735	1.334	0.4967	-0.6643	5.0401	-0.7834	9.7459	7.3601	5.9656	-5.0116	2.0289	4.5808	5.3978	3.4868	1.6234	-1.8836	1.8801	-2.8262	-0.2159	-3.1714	5.0171	2.128	1.9712	3.2526	8.1991	4.5386	-2.5479	1.7185	-9.9658	-5.5735	-5.5735	-0.7108	0.5568	-9.9658
GBMLGG	TCGA-CS-5396-01	3.53109	0.9115	-3.458	-5.5735	-0.5973	4.9528	-2.8262	4.7247	2.5413	-1.8836	-0.3566	-3.816	-9.9658	-5.5735	-4.6082	-0.5973	-2.6349	-0.7346	3.5224	-1.7322	5.745	8.1034	4.8243	-2.5479	-0.5543	4.4803	4.4861	1.5165	0.2522	-1.1811	1.2209	-4.035	-3.816	-2.6349	4.8535	-0.5973	0.0854	3.3591	8.6957	2.8994	-5.0116	0.2154	-9.9658	-5.0116	-9.9658	-6.5064	-1.685	-9.9658
GBMLGG	TCGA-HW-8322-01	4.0152	1.0007	-1.7322	-1.8836	-1.4699	5.2694	-3.0469	6.5192	2.4779	-1.0862	-3.0469	-2.3147	-9.9658	-5.5735	-9.9658	0.4967	-3.3076	1.3956	3.4856	0.6608	2.6371	6.0792	5.119	-0.1993	-0.1187	3.2282	3.1145	0.9642	-0.6873	-2.3147	1.2636	-4.2934	-5.0116	-3.1714	5.3259	-0.1187	-1.0262	3.5237	9.3566	1.8762	-5.0116	1.0503	-9.9658	-9.9658	-9.9658	-5.5735	0.9493	-9.9658
GBMLGG	TCGA-S9-A6U9-01	2.43023	1.8242	-4.2934	-2.9324	-0.2845	5.0588	-3.3076	7.0948	4.2884	-5.5735	-1.8314	-2.9324	-9.9658	-5.5735	-9.9658	0.3685	0.4552	-3.0469	5.927	-1.7809	3.906	7.3139	7.5937	-3.3076	-0.4921	2.4857	3.1129	1.5465	-1.0559	-3.1714	2.1444	-3.6259	-3.816	-3.3076	5.1231	-1.685	-0.9686	3.9617	8.7398	3.4817	-5.5735	1.6466	-9.9658	-9.9658	-9.9658	-0.1504	4.4667	-9.9658
GBMLGG	TCGA-HT-7676-01	3.01439	1.3679	-5.5735	-1.9379	-0.1665	5.4145	-2.6349	7.765	4.8739	-4.6082	-0.1187	-2.3884	-9.9658	-9.9658	-9.9658	-0.9406	-3.6259	-3.458	5.1482	-2.3884	3.309	7.046	6.7552	-0.9686	-1.7809	4.0366	4.8069	0.9716	-1.6394	-5.5735	2.5188	-6.5064	-9.9658	-3.6259	4.8207	-1.7809	-3.816	4.0584	9.1244	2.1894	-5.0116	2.0638	-9.9658	-9.9658	-9.9658	-1.0262	1.3901	-9.9658
GBMLGG	TCGA-HT-7469-01	3.78976	2.6895	-9.9658	-5.0116	0.058	7.1059	-2.5479	7.2007	3.8023	-3.458	-3.3076	-2.8262	-1.9379	-5.5735	-4.6082	0.8164	-2.8262	-3.3076	4.7143	-1.5951	6.2629	7.0367	5.3118	-3.458	-2.0529	5.3848	4.5255	-0.2671	-1.1811	-6.5064	1.2147	-5.0116	-3.816	-2.7274	4.1652	0.1648	-1.1811	3.9185	9.4441	1.3397	-6.5064	0.4447	-9.9658	-9.9658	-9.9658	-1.5951	1.7141	-9.9658
GBMLGG	TCGA-32-2634-01	4.68091	1.8879	-3.816	-2.2447	-0.1187	6.7618	-2.3884	4.9175	3.5387	-2.6349	-0.6873	-2.9324	-2.3884	-9.9658	-5.5735	0.8164	-0.3566	-0.8339	5.4806	-4.035	8.6051	7.203	4.8778	-0.2328	-1.0862	3.5274	1.6512	0.9642	-1.6394	-1.3548	2.7742	-9.9658	1.9822	-1.9379	5.1752	3.0774	-0.9132	4.1318	8.0992	5.3338	-5.5735	1.8078	-9.9658	-9.9658	-9.9658	-1.0559	2.4144	-9.9658
GBMLGG	TCGA-HT-7478-01	2.79288	1.5415	-1.3183	-1.5105	0.3231	5.7071	-1.1488	7.2654	5.3848	-1.5522	0.547	-3.816	-9.9658	-2.8262	-5.0116	-0.1828	-0.9406	0.5568	5.2354	-1.1172	3.1507	6.7396	6.8178	-2.3884	2.1378	5.432	6.1973	3.7909	-0.8084	-2.0529	2.7615	-2.114	-3.1714	-3.1714	6.1295	3.074	0.7146	4.6206	8.7125	4.0118	-3.458	3.0995	-9.9658	-5.5735	-4.035	0.1388	4.5565	-9.9658
GBMLGG	TCGA-DU-A5TW-01	2.33342	2.4883	-3.1714	-4.2934	-0.3201	4.7898	-5.5735	7.5	3.1028	-9.9658	-2.3884	-2.2447	-9.9658	-9.9658	-9.9658	0.4447	-4.035	-3.816	4.7263	-2.7274	3.6359	7.6531	6.0162	0.24	-3.6259	3.0074	4.0198	-2.2447	-1.9942	-2.1779	0.8408	-9.9658	-9.9658	-4.2934	5.4483	-2.3147	-4.2934	3.29	8.7975	2.3564	-9.9658	0.2522	-9.9658	-9.9658	-9.9658	-3.458	0.1903	-9.9658
GBMLGG	TCGA-S9-A6TX-01	2.83594	1.3283	-9.9658	-3.3076	-1.5951	4.3834	-4.035	4.8861	2.1606	-2.3884	-3.458	-3.1714	-2.6349	-9.9658	-5.0116	-1.685	-3.6259	-3.1714	3.6254	-1.5522	4.5699	7.4438	5.703	-4.2934	-4.035	3.5547	3.6939	-0.4325	-1.0862	-4.6082	0.8961	-6.5064	-9.9658	-3.816	5.2873	-4.035	-3.1714	2.7227	8.7829	0.6608	-9.9658	1.9895	-9.9658	-9.9658	-9.9658	-5.5735	-2.9324	-9.9658
GBMLGG	TCGA-RY-A83Z-01	3.77928	1.7744	-2.7274	-4.035	-3.458	5.9941	-2.5479	5.7913	3.4183	-9.9658	-3.6259	-4.6082	-9.9658	-9.9658	-9.9658	1.2934	-9.9658	-5.0116	4.6994	-4.035	2.3843	7.9927	5.85	0.9115	-3.816	3.0145	3.2572	0.3907	-0.9132	-6.5064	1.2992	-9.9658	-5.0116	-5.0116	5.5223	-5.5735	-6.5064	2.6418	8.531	1.0503	-5.5735	0.7579	-9.9658	-9.9658	-9.9658	-2.6349	0.24	-9.9658
GBMLGG	TCGA-06-0141-01	2.95045	0.1648	-0.4325	-2.1779	1.3511	5.9978	-0.4131	5.2025	5.3576	3.4398	2.791	-1.2481	-9.9658	-3.1714	-4.2934	0.0854	-1.8836	-0.2671	5.3245	-1.7322	6.4194	7.3683	5.8861	-4.2934	2.5363	3.7356	4.2593	3.2766	0.3907	-1.1488	4.6023	-3.6259	2.7763	-2.0529	3.2915	3.6566	-0.0277	4.1211	7.9307	4.528	-2.7274	1.5902	-9.9658	-9.9658	-5.5735	-0.7588	2.9281	-9.9658
GBMLGG	TCGA-06-0125-01	4.2357	1.8282	-3.3076	-2.114	0.9191	6.9622	-3.3076	6.0459	3.4477	-0.6416	-1.9379	-1.2828	-2.1779	-9.9658	-5.5735	0.0854	-2.7274	-2.3147	5.4591	-0.9406	10.1666	6.8926	4.7143	-2.7274	-1.7322	4.0091	4.2669	-0.1345	-1.4699	-4.035	2.3788	-5.5735	-1.5951	-1.9942	5.9301	3.3264	-0.4719	4.1194	9.0824	4.0935	-9.9658	1.5366	-9.9658	-9.9658	-9.9658	-1.8836	1.8078	-9.9658
GBMLGG	TCGA-FG-A6IZ-01	3.10435	1.5758	-9.9658	-6.5064	-2.3147	5.2694	-3.458	3.7667	2.296	-1.9379	-3.816	-3.816	-9.9658	-9.9658	-5.0116	0.1903	-3.1714	-2.114	3.5596	-1.9942	2.2113	8.1086	5.2192	-2.3884	-1.3921	3.0074	5.178	0.5271	-0.0574	-5.5735	0.688	-9.9658	-5.0116	-6.5064	5.1672	-1.7809	-2.5479	2.6441	7.3955	0.9493	-5.0116	0.9493	-9.9658	-9.9658	-9.9658	-9.9658	-2.114	-9.9658
GBMLGG	TCGA-CS-4941-01	3.48675	4.439	-1.8836	-0.9406	2.6579	5.3345	-2.6349	7.1483	5.3223	1.4859	0.6608	-9.9658	-9.9658	-4.2934	-4.6082	0.9191	-0.7588	0.5955	5.2188	-0.6416	5.2468	7.5668	6.2882	-3.6259	2.0147	5.4506	6.6703	3.9892	1.196	-1.8836	2.982	-1.685	-1.3548	-0.8084	5.5466	6.0555	2.1541	4.4764	8.6986	4.096	-1.8314	2.299	-9.9658	-9.9658	-3.816	-0.0574	1.5514	-9.9658
GBMLGG	TCGA-DH-A7UT-01	2.22651	1.2756	-4.2934	-3.6259	-0.7346	4.981	-3.6259	5.5305	3.716	-9.9658	-0.2671	-1.8836	-2.114	-9.9658	-9.9658	-0.5973	-3.3076	-4.2934	5.5148	-3.816	3.8451	6.9602	6.3031	-0.6643	-3.0469	3.4596	3.2251	-2.9324	-1.1811	-9.9658	1.7053	-9.9658	-9.9658	-4.2934	7.1818	-3.458	-5.0116	3.1556	8.2483	2.0218	-9.9658	2.5876	-9.9658	-9.9658	-4.035	-0.1504	2.7073	-9.9658
GBMLGG	TCGA-DU-5871-01	2.08066	1.2934	-2.0529	-2.7274	0.1648	4.7955	-2.5479	7.669	3.9232	-9.9658	0.1648	-3.816	-9.9658	-5.5735	-9.9658	-0.6643	-2.9324	-4.2934	5.4403	-2.7274	3.9337	7.3443	6.0328	-3.458	-2.3147	2.7292	2.3077	0.1257	-1.9942	-2.9324	2.5363	-5.0116	-1.9379	-3.6259	5.9517	0.9419	-4.2934	3.7248	8.5768	4.0985	-9.9658	0.7748	-9.9658	-9.9658	-9.9658	-0.1504	3.6838	-9.9658
GBMLGG	TCGA-HW-8321-01	2.42495	1.5661	-3.3076	-2.5479	0.0854	5.5799	-3.0469	8.1416	3.5791	-2.3147	-9.9658	-2.8262	-9.9658	-4.6082	-3.3076	0.6608	1.334	-2.1779	4.6242	-3.3076	5.4483	6.8421	5.5796	-1.1172	-1.4699	3.3464	3.8441	0.6517	-1.4305	-2.6349	1.7316	-9.9658	-5.0116	-1.2142	7.8885	1.8444	-1.8314	3.6759	8.6571	6.1601	-5.5735	3.5766	-9.9658	-5.5735	-5.5735	-2.3884	4.1219	-9.9658
GBMLGG	TCGA-EZ-7264-01	3.83993	1.0915	-3.0469	-3.6259	-1.5951	5.2122	-4.035	5.8849	1.766	-9.9658	-5.0116	-2.9324	-9.9658	-6.5064	-9.9658	-0.5125	-3.0469	-2.4659	2.9071	-1.9942	3.5863	6.2464	4.4667	-3.1714	-2.114	4.2795	3.831	-0.8339	-0.6643	-3.0469	0.517	-9.9658	-9.9658	-3.816	4.9603	-1.9942	-4.035	2.9581	8.8327	1.1706	-9.9658	-0.394	-9.9658	-9.9658	-9.9658	-2.6349	0.7748	-9.9658
GBMLGG	TCGA-CS-6666-01	2.84998	2.8137	-5.5735	-3.816	-0.1828	6.0222	-6.5064	7.3672	3.2174	-3.458	-1.2828	-3.3076	-9.9658	-5.5735	-9.9658	-0.3201	-3.0469	0.6145	4.4417	-3.458	4.2929	6.8776	5.6156	-1.7809	-0.1993	2.6067	3.4477	2.0004	-1.1811	-2.3147	2.3451	-5.5735	-3.6259	-2.8262	6.9835	1.5316	-0.2845	3.695	8.6173	3.1393	-6.5064	1.7141	-9.9658	-9.9658	-9.9658	-2.3884	1.8957	-9.9658
GBMLGG	TCGA-HW-7491-01	3.83184	1.6187	-2.114	-4.035	-2.3884	5.0955	-4.6082	6.8751	1.9895	-9.9658	-5.0116	-5.0116	-9.9658	-9.9658	-4.2934	-1.4699	-4.6082	-2.3884	2.6556	-2.9324	5.7222	6.8207	4.9218	-1.9379	-2.6349	2.93	3.4197	-0.1993	-1.1488	-3.458	0.6608	-6.5064	-9.9658	-4.6082	4.8043	-5.5735	-2.0529	3.4958	8.4157	0.4233	-6.5064	0.1903	-9.9658	-9.9658	-9.9658	-6.5064	-2.3884	-9.9658
GBMLGG	TCGA-S9-A6U1-01	3.47892	2.2633	-3.0469	-4.2934	0.1903	5.6868	-3.6259	7.4752	4.2404	-9.9658	-2.3147	-1.9942	-2.2447	-9.9658	-9.9658	0.5271	-4.6082	-3.458	5.2548	-2.8262	4.9626	7.3381	6.2533	-3.0469	-2.3147	3.9223	3.9356	-0.0425	-1.2828	-3.816	1.8722	-5.5735	-4.6082	-4.2934	5.5711	-1.2142	-6.5064	4.0696	9.1324	1.9931	-6.5064	1.3511	-3.0469	-9.9658	-9.9658	-2.4659	2.9469	-9.9658
GBMLGG	TCGA-E1-5307-01	3.00362	0.537	-4.6082	-5.0116	0.4233	4.7603	-2.114	7.1924	3.7646	-9.9658	-1.5522	-4.2934	-9.9658	-9.9658	-9.9658	-2.114	-2.9324	-5.0116	4.9837	-3.6259	2.6464	7.0834	7.0264	-1.4699	-9.9658	3.6883	3.8611	-2.4659	-1.8314	-6.5064	1.3846	-9.9658	-9.9658	-5.5735	4.5293	-4.2934	-6.5064	3.8481	8.6372	1.7229	-6.5064	0.8408	-9.9658	-9.9658	-9.9658	-1.6394	1.7185	-9.9658
GBMLGG	TCGA-DU-A76L-01	3.89042	1.5013	-0.6416	-2.4659	3.0808	7.2075	-3.1714	4.5417	4.9987	1.2576	0.6969	-4.2934	-3.816	-4.035	-4.6082	-0.3022	-1.7322	-0.6873	5.6077	-3.6259	9.7802	7.3454	5.0023	-2.7274	0.7916	5.7493	6.6181	2.4857	-1.0559	0.8568	3.5982	-3.3076	3.9468	-1.3921	5.6511	4.6077	1.1577	4.9824	8.8971	6.244	-4.6082	3.3535	-4.035	-9.9658	-9.9658	0.1257	3.5374	-9.9658
GBMLGG	TCGA-HW-7495-01	3.00004	1.0007	-3.0469	-1.9942	-0.4719	4.3477	-2.5479	7.4055	2.4623	-9.9658	-2.2447	-3.3076	-9.9658	-9.9658	-9.9658	-1.8314	-5.0116	-3.458	3.4251	0.1388	4.3306	6.7491	6.3447	-2.1779	-9.9658	3.7116	3.1079	-1.4699	-1.4305	-9.9658	1.3623	-5.5735	-9.9658	-4.2934	6.2531	-4.035	-3.1714	2.9929	8.7208	1.2147	-6.5064	2.9729	-9.9658	-5.0116	-9.9658	-3.816	0.9191	-9.9658
GBMLGG	TCGA-CS-6669-01	2.67129	0.6239	-1.7809	-4.6082	-1.3548	3.2435	-4.6082	4.756	1.4756	-9.9658	-3.3076	-3.0469	-9.9658	-9.9658	-9.9658	-4.6082	-5.5735	-9.9658	2.667	-5.0116	3.6725	6.1629	5.922	-4.6082	-5.0116	1.2085	-1.3921	-1.3183	-1.5105	-6.5064	1.5415	-5.5735	-9.9658	-6.5064	6.7211	-2.1779	-9.9658	2.296	7.5848	0.2998	-6.5064	1.8918	-9.9658	-9.9658	-9.9658	-2.9324	-1.1172	-9.9658
GBMLGG	TCGA-HT-7481-01	3.64957	1.2576	-3.0469	-2.3884	-1.3183	4.7656	-2.6349	6.2103	2.3222	-9.9658	-3.816	-9.9658	-9.9658	-9.9658	-9.9658	-1.5951	-4.035	-5.0116	3.3278	-0.1828	4.1571	6.5461	6.0034	-1.5105	-2.0529	3.795	0.8568	0.4233	-1.3921	-3.816	1.0503	-9.9658	-9.9658	-9.9658	5.1322	-2.3147	-3.1714	2.9618	8.9206	0.9038	-6.5064	2.5087	-9.9658	-5.0116	-9.9658	-3.3076	0.6332	-9.9658
GBMLGG	TCGA-DU-8163-01	3.31619	1.8879	-4.6082	-0.5125	0.6332	5.3719	-0.9686	7.5939	4.7296	-4.2934	-0.1187	-2.8262	-9.9658	-9.9658	-5.5735	-0.4131	-2.6349	-2.3147	5.2676	-1.4305	3.4517	6.7807	6.9101	-0.5756	0.9038	3.9552	3.5682	1.683	-0.5332	-3.0469	2.7487	-0.6193	-9.9658	-3.3076	5.7819	-0.4521	-2.114	4.7453	8.9107	2.5388	-2.6349	2.6828	-9.9658	-9.9658	-9.9658	-0.6416	2.9984	-3.816
GBMLGG	TCGA-26-1442-01	2.20163	2.1247	-3.3076	-2.2447	0.1257	5.406	-1.5951	7.2831	3.4048	-9.9658	-1.3921	-1.1172	-9.9658	-9.9658	-9.9658	0.4657	-4.6082	-3.6259	4.6888	-2.3884	5.1736	7.2729	6.1324	-1.3548	-2.7274	4.2751	4.9089	0.2762	-0.1993	-3.3076	2.1957	-5.5735	-3.816	-4.2934	7.6246	-0.6193	-1.0862	3.5779	8.4873	2.4144	-5.0116	1.2085	-9.9658	-9.9658	-5.0116	-0.7346	2.0004	-9.9658
GBMLGG	TCGA-HT-8110-01	3.97359	0.4552	0.058	0.7579	1.6558	5.5451	-1.3548	8.6228	5.6966	-0.9406	0.4657	-4.035	-9.9658	-5.0116	-9.9658	-0.5973	-0.4921	-0.1031	5.2947	0.5763	4.7682	7.2648	6.6135	-2.9324	1.642	4.9002	6.332	2.6647	-0.3022	-2.3884	2.8602	-2.4659	-3.816	-0.9406	5.2784	4.1302	2.4675	4.9695	8.6413	3.3856	-3.458	2.6556	-9.9658	-9.9658	-5.5735	0.058	2.4649	-9.9658
GBMLGG	TCGA-RY-A840-01	3.50079	1.6281	-4.035	-5.5735	-1.8836	4.916	-6.5064	7.4355	0.8246	-9.9658	-4.2934	-4.6082	-9.9658	-5.5735	-9.9658	-0.3752	-9.9658	-4.2934	3.2251	-1.9379	3.2236	7.8154	3.8973	-2.2447	-3.3076	2.8442	2.9784	-0.4719	-0.4131	-5.5735	-0.394	-5.5735	-9.9658	-5.5735	6.4108	-3.3076	-4.2934	2.9469	8.7308	0.099	-9.9658	-1.3921	-9.9658	-9.9658	-9.9658	-9.9658	-1.685	-9.9658
GBMLGG	TCGA-VM-A8C9-01	2.77398	1.3623	-5.5735	-3.816	-0.2845	5.6966	-3.3076	3.3379	4.5503	-2.114	-1.3548	-3.458	-9.9658	-5.5735	-9.9658	0.1648	-2.7274	-1.5951	6.6758	-4.035	1.6649	8.3074	7.2086	-3.6259	1.9527	3.1393	4.0875	4.14	0.8164	-3.458	2.4675	-3.1714	-9.9658	-9.9658	5.3198	-0.4131	-2.4659	3.2205	7.5313	4.4257	-4.2934	1.9415	-9.9658	-9.9658	-5.5735	-3.3076	0.1388	-9.9658
GBMLGG	TCGA-HW-8319-01	3.47638	1.8918	-2.0529	-2.3147	0.7664	5.2736	-3.0469	9.0638	3.6359	-5.5735	-0.3752	-5.5735	-9.9658	-5.5735	-5.0116	-0.5756	-5.0116	-4.6082	4.466	-1.8836	4.811	6.8797	6.2517	-1.2828	-2.5479	4.3765	4.722	-1.2142	-2.114	-5.0116	1.7009	-9.9658	-3.816	-4.6082	5.8914	-1.7809	-3.816	4.3242	9.0096	2.9013	-6.5064	0.8961	-9.9658	-5.0116	-9.9658	1.949	5.572	-9.9658
GBMLGG	TCGA-HT-7482-01	2.39506	0.6425	-3.458	-1.8836	0.7058	5.1115	-2.2447	7.0402	4.857	-5.5735	-0.3566	-3.458	-9.9658	-9.9658	-9.9658	-1.6394	-5.0116	-4.6082	4.7777	-2.9324	4.1692	7.0029	6.3872	-2.9324	-1.5951	3.2282	3.716	0.2029	-2.0529	-3.458	2.4171	-5.0116	-9.9658	-4.6082	5.3705	-1.8314	-5.0116	4.2951	8.4422	3.1045	-6.5064	2.1606	-9.9658	-5.5735	-9.9658	0.099	4.0375	-9.9658
GBMLGG	TCGA-QH-A6CW-01	3.01255	2.0254	-5.5735	-3.458	-0.7834	5.8301	-3.458	6.6712	3.7836	-4.2934	-2.9324	-1.7809	-9.9658	-9.9658	-9.9658	1.2147	-0.6643	-4.6082	5.7782	-2.1779	5.4912	6.8132	7.5963	-1.9942	-1.3921	2.081	3.0808	0.3346	-0.8599	-4.6082	1.8078	-2.0529	-9.9658	-2.0529	5.3893	-3.0469	-4.6082	3.2389	8.9568	3.1011	-6.5064	1.7229	-9.9658	-9.9658	-9.9658	-1.4699	5.4165	-9.9658
GBMLGG	TCGA-DU-5870-01	3.45419	1.46	-3.1714	-1.8836	-1.1488	5.2265	-1.6394	8.3123	3.5287	-9.9658	-4.2934	-2.7274	-9.9658	-9.9658	-9.9658	-1.8314	-0.9971	-2.1779	4.404	1.2209	4.4542	7.1282	6.2612	-1.8314	-1.3921	4.2048	4.4189	1.125	-1.8314	-3.458	1.7141	-4.035	-4.6082	-4.6082	5.1958	-1.5105	-2.114	3.7324	8.7509	1.2756	-4.6082	1.2209	-9.9658	-9.9658	-5.5735	-4.2934	-0.5332	-9.9658
GBMLGG	TCGA-TM-A84S-01	3.37298	1.1316	-4.2934	-3.816	0.0158	4.7793	-3.6259	7.0646	3.2511	-9.9658	-2.7274	-2.3147	-4.035	-5.5735	-9.9658	-0.7346	-2.4659	-1.1488	4.5898	0.5666	4.0584	7.5204	6.0266	-1.3183	-0.7588	4.347	4.7798	1.1316	-0.6416	-5.5735	1.1184	-5.5735	-9.9658	-4.6082	5.3413	-1.2481	-1.0559	3.3549	8.3334	2.2482	-9.9658	1.0573	-4.6082	-9.9658	-9.9658	-1.8836	0.4125	-9.9658
GBMLGG	TCGA-26-5136-01	3.23269	1.3846	-0.7588	-2.114	0.9789	5.5034	-1.1811	5.4246	5.1851	0.4016	0.2881	-9.9658	-1.3921	-9.9658	-9.9658	2.2051	-0.8863	0.6239	5.3896	0.4447	7.4648	7.6622	4.7022	-2.9324	2.9875	4.7148	6.2565	4.1994	1.0433	-3.3076	3.6254	-3.1714	0.537	-1.2481	4.3992	5.4013	1.6374	4.2312	9.887	3.0446	-1.6394	1.4335	-9.9658	-9.9658	-1.9379	0.9642	4.5717	-9.9658
GBMLGG	TCGA-14-1034-01	3.72244	1.2333	0.0854	-4.6082	3.2034	6.8333	-1.6394	5.1498	4.7132	-4.035	0.2881	-9.9658	-9.9658	-9.9658	-5.0116	-1.3921	-2.6349	-0.9971	5.9043	-4.2934	7.2712	7.2978	6.5322	-2.9324	1.6045	4.0969	4.1716	2.3898	-1.1172	-3.0469	2.6185	-2.0529	0.6699	-5.5735	4.565	2.982	-0.0277	4.5466	8.2011	4.6312	-3.458	3.1145	-9.9658	-9.9658	-9.9658	-0.3752	3.3076	-9.9658
GBMLGG	TCGA-06-0184-01	2.93548	0.8805	-0.3383	-3.1714	1.2209	6.1163	-1.685	4.1103	5.6871	-1.3921	1.4335	-3.1714	-3.3076	-4.6082	-3.1714	-0.2498	-0.9406	-1.6394	6.6138	-1.9942	6.0348	7.5562	6.856	-3.6259	0.4761	4.0153	4.9477	2.3592	0.1776	-1.8836	3.0376	-3.6259	0.3685	-0.8863	4.0977	2.3077	-0.9686	4.843	7.7768	3.245	-4.6082	3.9829	-9.9658	-9.9658	-9.9658	-0.1504	2.6738	-9.9658
GBMLGG	TCGA-12-3652-01	3.45809	0.4447	-3.6259	-3.816	-0.2498	6.329	-3.816	4.7945	1.6466	0.2762	-2.7274	-5.5735	-0.013	-9.9658	-9.9658	-0.6873	-2.114	-2.4659	4.2803	-3.816	8.4918	7.4447	4.1994	-6.5064	-0.394	4.7672	4.859	1.7532	-0.9971	-3.816	1.0363	-4.6082	0.24	-4.2934	3.7625	4.7597	-1.3548	2.5804	8.0396	3.1145	-5.5735	-0.0425	-9.9658	-9.9658	-9.9658	-0.6416	-0.8599	-9.9658
GBMLGG	TCGA-RY-A845-01	3.20323	1.5563	-3.3076	-3.816	-0.1187	4.9322	-1.8836	7.9547	3.5098	-2.1779	-3.3076	-2.7274	-4.035	-5.5735	-9.9658	-0.8863	-4.6082	-5.0116	4.7725	-2.3147	3.2435	7.3223	6.6967	0.0718	-2.8262	4.3744	5.2521	-0.9406	-1.2828	-9.9658	1.0915	-9.9658	-5.0116	-4.6082	5.8927	-1.8314	-6.5064	3.7593	8.964	1.7489	-9.9658	1.4281	-9.9658	-5.0116	-9.9658	-2.6349	1.5216	-9.9658
GBMLGG	TCGA-76-4927-01	4.08324	1.6281	-4.6082	-1.9379	0.4552	7.0487	-1.7809	6.9279	5.174	-1.685	0.1124	-2.5479	-9.9658	-9.9658	-9.9658	-2.1779	-1.8836	-0.0277	5.749	-1.9942	7.7257	7.3313	5.7931	-2.7274	0.6608	3.6838	3.5827	2.59	-0.1187	-3.3076	3.9901	-3.816	-2.2447	-1.8836	4.9764	2.828	0.8164	5.1764	8.8697	5.2806	-5.5735	3.1924	-9.9658	-9.9658	-9.9658	-0.7346	2.2753	-3.0469
GBMLGG	TCGA-FG-8182-01	3.18747	2.0395	-9.9658	-4.6082	0.2522	5.2111	-2.7274	7.2556	4.7377	-9.9658	-1.685	-4.035	-9.9658	-9.9658	-9.9658	0.2277	-4.6082	-6.5064	5.2661	-3.6259	4.1515	6.7357	7.028	-1.5522	-1.4305	3.6136	3.4687	0.434	-1.3183	-6.5064	1.7954	-9.9658	-9.9658	-4.6082	5.23	-3.3076	-3.816	4.3541	9.08	1.7995	-5.5735	2.2082	-9.9658	-4.2934	-9.9658	0.8961	5.6902	-9.9658
GBMLGG	TCGA-14-0790-01	3.75056	1.6466	-0.5125	-2.4659	-0.8599	7.0502	-3.6259	7.4981	1.8762	0.7579	-2.6349	-1.8836	-1.5522	-9.9658	-9.9658	-0.1187	-5.5735	-0.9686	3.9901	-2.2447	5.7279	7.1548	3.8289	-2.9324	0.6608	5.1002	5.7195	2.2051	-1.9379	-3.458	1.3283	-2.4659	-4.035	-1.8314	5.2442	3.8228	3.3506	3.741	9.0388	3.3192	-2.9324	-0.8339	-2.9324	-9.9658	-9.9658	-2.6349	0.3573	-9.9658
GBMLGG	TCGA-26-5132-01	3.62639	1.8762	-2.114	-3.3076	1.125	6.6224	-0.9971	5.7038	3.8157	-1.1811	-0.4921	-2.3147	-1.1811	-5.0116	-4.2934	0.6332	-0.8084	-0.6416	5.8069	-1.3548	9.6176	7.9216	5.4067	-2.9324	1.1117	4.2728	5.383	2.8402	0.6699	-0.7588	3.1062	-2.5479	-2.9324	-1.7809	4.4189	2.9802	1.9302	4.2173	8.2541	3.834	-1.8314	1.3397	-9.9658	-9.9658	-3.458	-1.7809	1.5612	-9.9658
GBMLGG	TCGA-FG-6688-01	3.26455	0.2762	-1.8314	-0.9132	0.7321	5.2567	-2.3884	5.1027	4.7496	-2.6349	-2.4659	-3.816	-2.3147	-9.9658	-9.9658	-1.3921	-2.1779	-1.8836	5.2679	-2.3884	4.3463	7.2948	6.5454	-4.2934	-0.8863	3.8177	4.9964	2.1013	-1.5105	-4.2934	1.6281	-3.816	-4.035	-3.6259	5.4013	1.7617	-1.3921	3.7226	8.1116	4.0541	-6.5064	3.4945	-9.9658	-9.9658	-9.9658	-0.5973	1.2934	-9.9658
GBMLGG	TCGA-TQ-A7RP-01	3.46464	1.3567	-1.3548	-2.1779	-0.1504	4.4337	-4.035	6.5853	3.1685	-3.6259	-2.6349	-3.458	-2.8262	-9.9658	-9.9658	-0.8339	-1.1488	-2.7274	5.302	-0.9971	5.5784	7.9968	6.36	-3.816	-0.2498	3.4868	3.1908	2.0946	0.2277	-5.0116	1.1184	-3.0469	-3.458	-3.816	3.8198	-0.7108	-1.2142	3.1653	7.9094	2.5634	-5.5735	2.9637	-9.9658	-4.6082	-9.9658	-2.114	2.0111	-3.3076
GBMLGG	TCGA-HT-8113-01	2.64614	0.9716	-1.3921	-2.7274	0.2154	3.6347	-3.6259	6.2271	1.2455	-9.9658	-2.5479	-2.114	-9.9658	-5.0116	-4.6082	-0.7346	-4.6082	-2.9324	2.876	-2.9324	3.8441	6.4445	5.6918	-4.2934	-0.9132	2.8936	2.6418	1.8242	-0.8863	-3.3076	1.1447	-3.458	-4.6082	-6.5064	6.2182	0.5666	-5.0116	2.7931	8.1123	1.7053	-6.5064	2.1476	-9.9658	-9.9658	-9.9658	-1.2142	2.7161	-9.9658
GBMLGG	TCGA-76-4932-01	4.15788	1.0915	-3.0469	-3.458	1.7617	6.7046	-9.9658	6.634	3.7072	-1.1811	-1.2481	-4.2934	0.2029	-5.0116	-5.5735	-1.685	-4.2934	-2.1779	5.4473	-3.6259	9.3067	7.5527	5.3982	-2.6349	-2.1779	4.3385	5.3234	1.0503	-1.5522	-6.5064	2.1213	-9.9658	-2.5479	-4.035	5.406	2.1862	-0.3752	4.0994	8.8598	4.1078	-5.0116	0.4657	-9.9658	-9.9658	-9.9658	-0.8339	3.2189	-9.9658
GBMLGG	TCGA-HT-7689-01	3.02676	0.7493	-2.8262	-2.8262	0.3796	5.3038	-2.7274	6.8986	3.9938	-9.9658	-0.9971	-2.8262	-9.9658	-9.9658	-9.9658	-1.8314	-5.5735	-4.6082	4.8744	-2.4659	3.5982	6.8569	5.8729	-0.7588	-2.3147	4.1474	4.6977	0.6239	-1.3183	-5.0116	1.5612	-5.0116	-4.035	-5.5735	5.4732	2.4063	-2.8262	3.7825	8.5305	2.5948	-4.2934	2.8701	-9.9658	-9.9658	-9.9658	-1.6394	0.3907	-9.9658
GBMLGG	TCGA-FG-7638-01	2.89722	0.9935	-4.035	-4.6082	-1.0862	4.5436	-1.9942	7.9897	1.9931	-5.5735	-3.0469	-5.5735	-9.9658	-5.0116	-5.5735	-2.114	-6.5064	-2.9324	3.1876	-0.4521	3.9506	7.2641	5.104	-3.6259	-0.8863	3.6101	4.3002	0.9419	-1.2828	-6.5064	0.688	-4.6082	-5.0116	-9.9658	6.4194	0.2154	-0.6193	3.1475	8.5777	1.1447	-9.9658	0.688	-9.9658	-9.9658	-9.9658	-3.1714	-1.0862	-9.9658
GBMLGG	TCGA-DU-7013-01	4.40804	1.7009	-5.5735	-1.5522	2.3788	6.2036	-1.3921	8.2163	4.4739	-0.5756	-3.3076	-4.035	-3.458	-5.0116	-9.9658	-0.9971	-1.0862	0.5271	4.5318	-1.7809	5.8724	6.6823	5.6393	-1.5951	0.6517	4.6691	5.0998	2.8199	-0.9406	-1.8836	2.5238	-1.8836	-4.2934	-1.2142	5.2445	4.1764	1.934	4.5009	9.4684	2.5112	-2.2447	1.6327	-9.9658	-9.9658	-5.5735	-1.5105	0.9568	-9.9658
GBMLGG	TCGA-32-1970-01	4.24792	2.3048	-0.6643	-9.9658	0.9343	5.5647	-2.3884	5.9096	3.9346	-0.3383	-2.2447	-3.1714	-9.9658	-3.816	-2.4659	-0.0425	-1.6394	-2.7274	4.8978	-2.6349	5.7618	7.1832	6.0418	-2.9324	0.1124	5.3234	6.3149	1.9034	-0.4521	-3.0469	1.6558	-5.5735	-0.6416	-4.035	4.8141	3.623	0.4233	3.945	8.1956	3.7603	-5.0116	3.3177	-9.9658	-9.9658	-5.0116	-1.5951	1.5806	-3.6259
GBMLGG	TCGA-E1-A7Z3-01	3.0179	2.0004	-3.1714	-9.9658	0.24	4.7913	-1.8314	6.6253	3.2541	-9.9658	-2.114	-2.8262	-9.9658	-9.9658	-9.9658	-2.3147	-6.5064	-5.0116	4.8997	-1.7809	5.4912	7.235	6.7103	-2.6349	-2.6349	3.0411	4.0073	-0.2845	-1.5522	-4.6082	1.8604	-9.9658	-3.0469	-3.3076	5.9538	-1.685	-2.4659	3.8249	7.9135	2.6232	-6.5064	1.949	-2.0529	-9.9658	-9.9658	-1.7809	1.9452	-3.816
GBMLGG	TCGA-HT-7476-01	2.85196	1.6093	-3.3076	-2.5479	-0.6416	4.2706	-2.0529	6.1314	2.694	-4.035	-2.114	-3.3076	-9.9658	-5.0116	-9.9658	-0.5332	-4.6082	-3.0469	4.4523	-2.5479	4.2173	6.6883	5.6708	-2.4659	-0.5543	1.5266	1.1316	0.8961	-0.9406	-4.6082	1.7489	-4.2934	-9.9658	-3.6259	5.5355	0.058	-0.8599	3.47	8.5656	2.1147	-5.0116	1.3225	-9.9658	-9.9658	-9.9658	-2.4659	1.9601	-9.9658
GBMLGG	TCGA-TQ-A7RG-01	3.49951	1.2085	-1.685	-4.035	-0.7588	5.206	-3.3076	7.2563	3.2647	-2.3147	-1.8314	-2.8262	-9.9658	-9.9658	-9.9658	-0.0574	-2.9324	-0.4719	4.7587	-1.0862	4.4483	7.3303	5.7112	-2.3884	-0.4325	3.5337	3.7464	1.3109	-0.6193	-1.8836	1.2271	-3.816	-3.3076	-9.9658	5.6918	-0.3383	-1.3548	3.5994	8.8746	2.0111	-5.5735	0.3115	-9.9658	-9.9658	-9.9658	-4.035	1.6281	-9.9658
GBMLGG	TCGA-FG-8181-01	3.04266	1.7141	-2.3147	-6.5064	-0.2159	3.7248	-2.9324	4.3285	2.0465	-3.816	-2.3147	-3.6259	-9.9658	-5.0116	-9.9658	-1.5105	-3.1714	-3.6259	3.0706	-3.458	4.3597	6.2046	5.6691	-2.4659	-1.1811	2.5263	2.753	0.5069	-1.7809	-3.3076	1.9638	-9.9658	-5.0116	-4.035	6.8459	1.3454	-2.7274	2.7721	7.8326	3.4674	-4.035	0.3907	-9.9658	-9.9658	-5.5735	-2.1779	3.287	-9.9658
GBMLGG	TCGA-DU-A7T6-01	3.41008	1.6512	-4.2934	-4.2934	-2.0529	5.2083	-2.8262	3.6125	1.7617	-3.0469	-2.7274	-4.035	-9.9658	-9.9658	-6.5064	0.099	-3.6259	-2.3884	4.0109	-0.9971	4.9156	7.3	4.4816	-1.1811	-0.4719	3.5559	2.236	1.0779	0.6332	-4.6082	2.1313	-3.6259	-1.8836	-4.6082	5.6548	0.8082	-0.4719	3.4556	8.8451	1.4652	-6.5064	1.4228	-9.9658	-9.9658	-9.9658	-4.035	-0.1187	-5.5735
GBMLGG	TCGA-DB-A4XC-01	3.68486	2.118	-1.7809	-1.3921	-0.8863	4.8744	-1.2142	7.7038	4.1788	-9.9658	-0.6193	-0.7588	-9.9658	-9.9658	-9.9658	0.9191	-3.1714	-3.6259	4.9213	-1.1172	3.6793	6.716	6.5898	-0.7588	-1.5522	3.9865	4.4223	1.1706	-1.5951	-3.816	1.3567	-5.0116	-3.816	-9.9658	5.359	0.058	-2.114	3.9515	8.8496	2.4252	-4.6082	1.3167	-9.9658	-9.9658	-9.9658	-1.9379	0.4865	-9.9658
GBMLGG	TCGA-FG-A4MW-01	3.49568	1.683	-1.5522	-9.9658	-0.7108	5.1002	-4.2934	6.6946	3.0217	-1.685	-5.0116	-1.7809	-3.3076	-9.9658	-9.9658	-0.9686	-4.2934	-4.035	4.7735	-3.3076	5.3657	7.4398	5.7877	-1.5951	-3.0469	3.9374	4.8095	0.8246	-1.7809	-4.6082	1.4065	-9.9658	-1.0862	-1.7322	6.399	2.496	0.4657	3.0688	8.5675	2.3704	-5.0116	2.9319	-9.9658	-9.9658	-9.9658	-2.5479	-0.2328	-9.9658
GBMLGG	TCGA-06-0219-01	3.23726	-0.0574	-2.9324	-3.1714	-0.2671	5.7217	-5.0116	4.8856	4.9026	0.9419	1.816	-3.458	-2.8262	-5.5735	-9.9658	-0.4521	-5.0116	0.03	4.5699	-6.5064	7.5986	7.2481	3.8983	-4.2934	1.0847	3.9478	3.8157	2.2082	-1.4699	-3.0469	2.3677	-5.0116	0.5069	-1.8314	2.5756	6.0153	-0.1031	3.9166	7.7211	1.9601	-9.9658	1.5563	-5.0116	-9.9658	-5.5735	0.8408	2.5112	-9.9658
GBMLGG	TCGA-DH-5142-01	3.46856	1.5165	-3.1714	-1.6394	-0.5756	5.5787	-1.5951	7.3537	4.9491	-0.3566	1.2696	-2.6349	-9.9658	-2.0529	-2.0529	-0.9971	-3.0469	0.044	4.6905	-1.1488	4.0824	7.3419	6.9385	-1.4699	3.9983	4.696	5.6303	2.7249	0.058	-2.5479	2.4675	-2.9324	-3.816	-2.7274	5.4925	2.2452	0.346	3.6113	8.3931	3.4318	-3.458	1.5064	-9.9658	-9.9658	-3.458	0.044	3.6894	-9.9658
GBMLGG	TCGA-14-0787-01	4.06611	0.8726	-2.4659	-5.5735	2.4985	7.4072	-2.6349	5.4686	4.3548	-0.013	-0.1828	-3.458	1.3167	-9.9658	-9.9658	-1.0862	-2.1779	-0.9971	5.9876	-3.0469	7.4562	7.9516	4.9346	-4.2934	0.3231	4.2571	4.7945	2.2206	-1.5522	-3.3076	2.7572	-3.0469	-0.7834	-2.114	5.1111	4.6972	1.614	3.9856	8.181	5.5367	-3.6259	3.5947	-9.9658	-9.9658	-2.8262	-0.7588	3.0181	-9.9658
GBMLGG	TCGA-S9-A6U2-01	3.28536	1.7828	-3.458	-6.5064	-0.4131	4.5142	-2.3884	8.4661	3.5694	-9.9658	-1.685	-5.0116	-9.9658	-9.9658	-5.5735	-1.5105	-3.458	-2.5479	4.5173	1.8201	4.9065	7.2103	5.7488	-3.816	-1.2142	4.504	4.0383	0.1519	-0.6873	-3.816	1.7786	-5.5735	-9.9658	-4.035	5.7263	-1.1488	-2.114	4.0225	8.8694	1.5165	-6.5064	1.0079	-9.9658	-9.9658	-9.9658	-1.6394	3.6657	-9.9658
GBMLGG	TCGA-12-0618-01	4.19454	1.5902	-1.4699	-1.7809	-0.6643	6.0392	-2.1779	6.4965	3.3076	-4.035	-1.7809	-2.5479	-9.9658	-9.9658	-5.5735	0.4967	-2.3147	-0.7588	4.4243	-2.9324	10.1586	7.6931	4.5516	-1.2481	-2.7274	4.0073	3.7421	1.0642	-0.7346	-2.3147	1.5514	-5.5735	-4.6082	-1.8836	4.3046	1.9034	-1.6394	3.1717	8.7537	3.4224	-6.5064	1.8363	-9.9658	-9.9658	-9.9658	-0.7588	1.2934	-9.9658
GBMLGG	TCGA-27-2524-01	3.99635	1.6374	-4.2934	-5.5735	0.9268	6.7765	-4.6082	3.483	4.6029	-0.394	0.547	-4.035	0.0718	-9.9658	-9.9658	-1.4305	-2.9324	-2.2447	5.6471	-4.2934	8.1041	7.2473	4.439	-5.5735	0.9568	2.7763	3.0376	3.287	-0.9971	-2.1779	3.3076	-5.0116	4.3306	-1.2828	5.322	3.5803	-1.8314	3.8249	8.5624	5.8941	-5.0116	3.5187	-9.9658	-9.9658	-9.9658	1.642	5.5274	-9.9658
GBMLGG	TCGA-TQ-A7RH-01	3.01439	2.2019	-3.458	-2.114	0.6969	5.433	-3.458	6.2533	4.2064	-9.9658	-0.4131	-2.114	-2.4659	-9.9658	-5.0116	0.8883	-1.3183	-1.2481	5.2476	-2.6349	4.573	7.6771	6.08	-0.9132	-0.3201	3.9755	3.4143	0.679	-0.5125	-4.035	2.1509	-4.2934	-5.0116	-5.0116	4.7464	0.5271	-3.6259	3.991	8.2471	3.0074	-5.5735	1.2636	-9.9658	-9.9658	-3.458	-1.3548	2.5188	-9.9658
GBMLGG	TCGA-08-0386-01	4.06696	1.8957	0.4447	-2.8262	1.196	6.3286	-1.9379	6.7879	3.3938	-1.3183	-1.3921	-3.6259	-2.8262	-9.9658	-9.9658	-0.4521	-2.8262	-2.3147	5.5379	-1.2828	9.1627	7.4711	5.1322	-3.1714	-1.7809	3.7804	5.0392	-1.1172	-2.9324	-3.3076	2.5828	-9.9658	-2.8262	-2.6349	5.1437	0.346	-2.4659	4.2304	8.7954	4.3499	-9.9658	1.6875	-9.9658	-9.9658	-9.9658	-0.3566	2.6873	-9.9658
GBMLGG	TCGA-DB-A75M-01	2.40868	2.128	-2.5479	-2.9324	-1.3183	5.2017	-3.6259	7.9424	3.136	-5.5735	-1.8836	-2.7274	-4.035	-9.9658	-9.9658	-0.9971	-5.0116	-2.7274	5.3151	-1.5105	4.3688	7.4254	7.0202	-1.2142	-1.4699	3.1377	3.7571	0.7321	-0.9971	-4.6082	1.787	-5.0116	-9.9658	-9.9658	6.1279	-2.2447	-3.3076	2.6418	8.8761	2.3135	-5.5735	0.4761	-9.9658	-9.9658	-9.9658	-2.114	-0.1187	-9.9658
GBMLGG	TCGA-HT-8012-01	2.88364	2.0218	-2.1779	-5.0116	-0.6873	4.1756	-2.5479	5.5802	2.8199	-5.5735	-1.1811	-1.5105	-9.9658	-9.9658	-9.9658	-0.0425	-4.035	-1.9379	4.0462	-1.4305	4.0019	6.6925	5.8258	-3.1714	-2.7274	4.5553	2.9747	-0.394	-0.9686	-1.8836	1.2756	-4.6082	-5.0116	-4.6082	5.7458	-3.816	-3.6259	3.1523	8.6206	2.183	-9.9658	0.3231	-4.2934	-4.2934	-9.9658	-3.6259	1.4652	-9.9658
GBMLGG	TCGA-S9-A7QW-01	3.09596	1.3791	-9.9658	-9.9658	-2.3147	5.0113	-4.6082	7.708	2.3193	-9.9658	-4.6082	-2.9324	-9.9658	-9.9658	-9.9658	-0.7588	-3.6259	-9.9658	4.2609	-3.6259	3.1011	7.3241	4.8679	-1.1172	-3.816	3.4424	3.6136	-1.4305	-1.2828	-9.9658	0.2762	-5.5735	-4.6082	-5.5735	6.2321	-2.9324	-5.0116	3.1876	9.0426	0.1903	-6.5064	0.3346	-9.9658	-9.9658	-9.9658	-0.8339	2.9109	-9.9658
GBMLGG	TCGA-P5-A733-01	2.02148	0.8327	-3.1714	-4.2934	-0.2159	3.1245	-4.2934	7.0729	0.9716	-9.9658	-3.816	-5.5735	-9.9658	-9.9658	-9.9658	-2.4659	-9.9658	-4.2934	3.3814	-2.4659	3.8531	7.2407	5.1031	-2.2447	-3.3076	2.4386	3.242	-1.3183	-3.1714	-5.5735	0.7233	-6.5064	-9.9658	-9.9658	4.849	-3.458	-6.5064	2.8681	8.3512	1.4756	-6.5064	-0.4325	-9.9658	-9.9658	-9.9658	-2.3147	1.9034	-9.9658
GBMLGG	TCGA-E1-A7Z4-01	2.41951	1.2209	-4.035	-1.5105	-0.4719	4.4549	-5.0116	7.9626	4.1724	-1.7809	-0.1031	-5.5735	-9.9658	-9.9658	-9.9658	-1.9379	-3.3076	-1.7322	5.5555	-2.9324	2.9893	8.0425	6.4603	-2.6349	-2.5479	2.9637	3.8157	-1.0262	-0.8339	-3.458	2.4779	-9.9658	-9.9658	-3.0469	4.8253	-0.2498	-1.8314	3.838	8.9814	2.3308	-6.5064	0.7321	-9.9658	-9.9658	-9.9658	-0.6416	2.3222	-9.9658
GBMLGG	TCGA-DU-A5TR-01	2.01432	1.5902	-2.1779	-2.4659	-0.4719	5.5355	-0.6873	6.2902	4.4848	-1.2142	0.6239	-1.9379	-2.5479	-1.7809	-2.1779	0.9935	-1.5105	-0.4921	5.6396	-2.4659	3.3938	7.4069	6.3832	-1.0262	3.421	4.061	4.8837	3.055	0.7233	-4.2934	2.6828	-3.3076	-3.458	-2.0529	5.4219	1.1117	-0.3201	3.1112	7.8309	3.5535	-4.2934	2.2603	-9.9658	-9.9658	-4.6082	2.2144	5.7605	-9.9658
GBMLGG	TCGA-FG-8185-01	2.50843	2.05	-3.816	-3.0469	-1.3548	4.7421	-3.0469	7.1671	2.0183	-4.2934	-2.5479	-2.6349	-9.9658	-9.9658	-9.9658	0.4016	-2.3147	-5.5735	4.3513	-4.6082	4.5423	6.6234	5.4667	-1.8836	-3.816	3.2707	4.5528	-1.0262	-1.9942	-5.0116	1.0503	-6.5064	-9.9658	-5.0116	6.0751	-2.3884	-3.6259	3.1294	8.8486	1.6558	-6.5064	0.9343	-9.9658	-9.9658	-9.9658	-0.7108	4.0593	-9.9658
GBMLGG	TCGA-HW-8320-01	2.39783	1.6785	-3.1714	-1.9942	0.2762	5.3622	-2.7274	8.3864	3.7204	-5.5735	-0.7834	-2.8262	-4.035	-9.9658	-5.5735	-0.1031	-0.8084	-4.6082	4.9364	-3.0469	4.6955	6.5256	6.0911	-1.5522	-3.816	3.0723	4.0445	-0.0425	-1.5951	-4.035	1.5514	-5.5735	-9.9658	-4.6082	6.6878	-0.5332	-2.114	3.8095	8.778	2.6579	-9.9658	0.7407	-9.9658	-9.9658	-5.5735	0.7664	6.0534	-9.9658
GBMLGG	TCGA-CS-6667-01	2.00357	1.9527	-3.0469	-3.6259	-0.8339	4.3075	-1.9942	7.3237	2.7051	-9.9658	-0.5973	-3.816	-3.458	-5.0116	-9.9658	-1.8836	-5.5735	-4.6082	4.0427	-3.816	4.7913	6.6611	6.5186	-1.685	-2.0529	2.6918	3.0774	-0.013	-2.9324	-3.1714	1.6964	-9.9658	-3.3076	-6.5064	5.6032	-2.5479	-3.3076	3.8491	8.5457	1.8282	-9.9658	0.2277	-9.9658	-9.9658	-9.9658	-3.6259	-0.7834	-9.9658
GBMLGG	TCGA-DU-5849-01	2.79699	1.5563	-4.6082	-4.6082	-0.4719	4.6787	-3.0469	6.7335	2.5658	-4.035	-1.4699	-3.1714	-9.9658	-9.9658	-9.9658	-1.3183	-3.3076	0.0158	3.6289	-2.5479	3.7635	6.9029	5.133	-2.6349	-0.1504	3.5498	4.1923	1.3679	-0.7834	-3.1714	1.7744	-5.0116	-5.0116	-4.6082	6.1681	0.547	-2.9324	2.7951	8.6545	2.685	-5.5735	2.2723	-9.9658	-9.9658	-9.9658	-1.1488	2.2663	-9.9658
GBMLGG	TCGA-DB-5279-01	3.13754	1.3225	0.099	-3.816	-0.3201	3.9682	-4.035	6.1412	1.9149	-3.458	-2.1779	-3.0469	-9.9658	-4.6082	-4.035	-1.9379	-3.0469	-1.2828	3.6646	0.9642	4.6041	7.0111	5.2969	-5.5735	0.4865	3.5349	3.6219	3.0446	-0.8863	-2.3884	1.1833	-3.1714	-3.458	-4.6082	5.1891	-0.4325	-1.7322	2.6441	8.7448	1.5415	-5.0116	0.2522	-9.9658	-9.9658	-9.9658	-0.6416	4.9778	-9.9658
GBMLGG	TCGA-06-0190-01	3.84803	0.9493	-0.2498	-1.4699	1.8722	6.9098	-1.0862	5.1563	4.9649	2.167	3.1278	-3.0469	-1.9942	-9.9658	-9.9658	0.9935	0.3573	0.0014	6.8197	-0.8599	9.0513	6.5173	5.9575	-2.9324	2.7401	4.0782	3.8993	4.0532	1.7995	-0.4921	3.5935	-2.2447	4.9449	-0.6643	5.3999	2.5756	1.5115	4.5892	8.489	5.4192	-1.8836	2.5828	-9.9658	-9.9658	-5.0116	1.1706	5.2525	-9.9658
GBMLGG	TCGA-CS-6670-01	3.35899	1.1706	-9.9658	-6.5064	-1.2142	4.5205	-9.9658	5.7706	0.7832	-9.9658	-2.114	-3.458	-9.9658	-5.5735	-9.9658	-1.4699	-5.0116	-9.9658	3.5337	-1.5951	3.1844	6.8227	6.5248	-2.114	-9.9658	2.7508	3.1344	-0.8084	-1.8836	-9.9658	0.6699	-9.9658	-3.0469	-4.6082	5.5311	-1.0559	-3.816	2.5561	8.3621	1.7009	-9.9658	-0.1504	-5.0116	-9.9658	-9.9658	-0.1665	5.1676	-9.9658
GBMLGG	TCGA-DB-A64V-01	2.7398	1.3623	-3.816	-2.2447	0.2998	4.5167	-2.1779	5.98	4.4257	-2.114	-2.7274	-2.3884	-9.9658	-9.9658	-9.9658	0.5859	-1.4699	1.5366	4.66	-0.7346	3.1195	7.6108	5.6528	-2.8262	1.9601	3.4464	4.2064	3.208	0.099	-2.6349	2.7073	-6.5064	-9.9658	-2.5479	4.8545	1.4441	-0.1187	3.1813	8.5318	2.7183	-5.0116	2.9109	-9.9658	-9.9658	-3.1714	-3.816	-0.5543	-9.9658
GBMLGG	TCGA-06-0745-01	3.847	1.8078	-1.0559	-4.2934	-1.1172	6.9211	-4.035	5.5292	4.1939	-0.9132	1.1184	-3.3076	-3.6259	-4.6082	-4.6082	-0.6416	-2.114	-0.6193	6.1445	-4.2934	8.3855	8.2112	5.31	-3.816	0.5859	4.2465	5.3975	2.2113	-0.0725	-2.5479	3.5399	-3.0469	-0.4521	-2.5479	4.7533	3.4765	1.177	4.0765	8.4244	2.9637	-4.035	1.3454	-9.9658	-9.9658	-9.9658	-0.4131	3.8769	-4.2934
GBMLGG	TCGA-DU-5854-01	3.29721	1.7702	-3.3076	-3.0469	0.8082	5.6893	-4.035	6.4421	5.1056	-2.3147	-1.8836	-3.0469	-9.9658	-9.9658	-4.2934	-1.8836	-2.0529	-1.2828	5.6259	-1.4699	5.43	7.1149	6.1252	-3.0469	1.105	4.5311	4.067	3.2405	0.1388	-2.6349	3.3856	-1.5951	-3.816	-3.3076	5.3965	0.8805	-0.6873	4.4996	8.8359	3.1475	-3.458	4.4263	-9.9658	-9.9658	-5.5735	-1.3921	-0.013	-9.9658
GBMLGG	TCGA-DH-A7UR-01	4.36319	3.3605	-3.6259	-2.9324	-1.1488	5.4253	-3.6259	4.8095	0.8961	-3.1714	-4.2934	-4.6082	-9.9658	-4.2934	-9.9658	0.7146	-6.5064	-2.8262	3.906	-2.9324	6.7593	6.8268	5.3705	0.2522	-0.5332	3.7539	3.5959	0.4016	-1.2828	-3.458	2.8542	-5.5735	-2.6349	-5.5735	5.1926	-0.0725	0.7407	3.3745	8.8373	1.9675	-9.9658	0.3231	-4.035	-5.5735	-9.9658	-4.2934	-0.4325	-9.9658
GBMLGG	TCGA-S9-A6WL-01	3.39505	2.3366	-4.035	-2.7274	0.0158	4.8314	-2.3884	6.3443	2.3898	-4.035	-2.9324	-3.458	-9.9658	-9.9658	-9.9658	-1.0862	-3.816	-3.1714	4.1994	-1.0862	5.193	6.6885	5.044	-2.6349	-2.5479	3.3745	3.7699	-0.4325	-0.2671	-1.5105	1.4065	-9.9658	-4.6082	-6.5064	5.9734	-1.7322	-2.114	3.8591	8.4425	2.694	-6.5064	1.0915	-9.9658	-9.9658	-9.9658	-4.2934	-1.8314	-9.9658
GBMLGG	TCGA-HT-7880-01	2.54347	1.8879	-3.1714	-5.5735	-0.0574	3.8925	-1.8314	6.0551	2.5437	-9.9658	-1.8314	-3.458	-9.9658	-9.9658	-9.9658	-1.4305	-5.0116	-3.3076	4.2274	-1.5105	4.706	6.8796	5.9554	-2.9324	-1.6394	2.6715	2.8916	1.3956	-0.9686	-5.0116	1.7786	-5.0116	-3.0469	-6.5064	5.7546	-3.816	-3.3076	2.8974	8.092	0.7832	-9.9658	2.9729	-3.6259	-9.9658	-5.0116	-2.8262	0.1519	-9.9658
GBMLGG	TCGA-26-5135-01	3.92794	3.4156	-1.685	-6.5064	0.6332	7.5019	-9.9658	4.9065	4.6764	-1.685	-0.3566	-9.9658	-9.9658	-4.6082	-9.9658	0.1124	-1.8314	-1.0262	6.4109	-0.7108	8.434	7.6447	5.6608	-3.458	0.1776	3.6883	4.7767	2.2237	-0.1665	-1.9942	4.2639	-4.2934	-1.0559	-0.8339	5.5056	3.9636	0.6699	4.8675	8.2331	4.2289	-5.5735	2.128	-9.9658	-9.9658	-9.9658	0.2522	4.6983	-9.9658
GBMLGG	TCGA-E1-5318-01	3.18105	2.6395	-9.9658	-9.9658	-1.3548	4.9165	-5.0116	5.5617	2.6602	-3.6259	-4.2934	-4.6082	-9.9658	-5.0116	-9.9658	-0.7834	-6.5064	-4.2934	3.8511	-2.6349	6.4254	6.7899	5.76	-2.2447	-2.8262	3.3619	2.8341	-1.1172	-1.3183	-2.3884	2.5238	-5.5735	-9.9658	-4.035	5.0229	-0.9686	-0.3022	4.1915	8.7313	1.5514	-9.9658	0.1519	-9.9658	-9.9658	-9.9658	-4.2934	-1.5951	-9.9658
GBMLGG	TCGA-DU-6393-01	4.23722	2.2206	-2.9324	-4.2934	-1.7322	3.9901	-4.035	4.0055	1.2756	-3.458	-3.458	-4.035	-9.9658	-6.5064	-9.9658	-0.1665	-4.2934	-3.6259	3.0393	-3.0469	4.8915	6.973	5.0361	-1.2828	-2.2447	4.5723	4.9764	-0.7588	-1.1811	-9.9658	0.4125	-5.5735	0.4016	-6.5064	4.6871	-2.3884	-1.8836	3.002	8.8316	1.1117	-6.5064	-0.4521	-9.9658	-4.6082	-4.2934	-5.5735	0.0718	-9.9658
GBMLGG	TCGA-41-3915-01	3.46073	0.7493	-0.2498	-2.6349	0.099	6.1946	-1.9379	4.8719	4.3306	-2.0529	1.4441	-2.7274	-1.5951	-5.0116	-4.6082	0.2029	-0.9686	-0.4131	5.62	-2.0529	8.9514	6.893	5.6071	-1.4699	1.8683	4.0575	3.5486	3.3478	0.7916	-1.3921	3.0252	-4.035	-0.8863	-2.0529	3.9552	1.2934	0.2762	4.1449	7.6867	4.5123	-2.0529	1.8078	-9.9658	-9.9658	-3.0469	0.4233	1.9034	-3.816
GBMLGG	TCGA-DU-5853-01	3.13425	1.6964	-4.035	-1.3183	0.2998	5.1194	-0.6193	8.162	4.3758	1.1382	-2.5479	-2.4659	-9.9658	-9.9658	-9.9658	-0.3383	-1.4305	0.4761	4.796	-1.3183	2.8701	7.0525	6.6076	-1.4699	0.8883	3.832	4.6352	2.7951	0.4125	-2.114	2.0742	-1.4305	-9.9658	-3.3076	5.838	-0.5332	1.5266	4.0082	8.9153	1.9786	-2.0529	0.8082	-9.9658	-9.9658	-9.9658	0.7146	5.392	-9.9658
GBMLGG	TCGA-TM-A84J-01	4.52423	1.766	-9.9658	-4.035	-1.3921	7.3875	-9.9658	2.4465	2.6533	-9.9658	-3.458	-2.2447	-9.9658	-5.0116	-5.5735	0.0014	-3.0469	-2.5479	4.8535	-9.9658	8.7746	6.7481	3.9552	-1.2142	-2.114	4.9289	1.9226	-0.0725	-1.685	-4.035	2.6464	-9.9658	-9.9658	-2.5479	4.0153	-2.9324	-2.9324	4.1111	9.3844	2.3536	-6.5064	0.4657	-9.9658	-9.9658	-9.9658	-0.4719	2.5036	-9.9658
GBMLGG	TCGA-FG-5962-01	3.64387	1.4808	-1.4305	-4.6082	0.3231	4.3328	-3.816	5.5395	2.5924	-5.0116	-2.114	-3.6259	-9.9658	-4.2934	-5.5735	-0.1031	-4.035	-3.458	3.7678	0.9642	4.1027	7.1203	6.0815	-1.7322	-1.0862	3.6916	4.4758	1.2394	-0.4325	-4.2934	1.5563	-5.5735	-9.9658	-4.6082	6.3094	0.5069	-1.4699	3.0463	8.2211	1.8918	-9.9658	0.688	-2.9324	-5.5735	-5.5735	-2.5479	3.5596	-9.9658
GBMLGG	TCGA-27-1831-01	3.0738	-0.0425	-2.7274	-0.9971	3.0825	5.166	-2.5479	6.2728	4.3611	1.0433	1.3051	-2.7274	0.0158	-9.9658	-5.5735	-1.1172	-3.0469	0.03	3.3966	-1.7809	5.5361	6.9803	4.2103	-5.0116	3.2973	4.546	4.5497	2.651	-0.9971	-4.035	2.0535	-1.8836	-1.4305	-3.0469	3.1604	6.0273	1.1316	3.906	8.5679	3.0145	-4.2934	-0.5756	-9.9658	-9.9658	-4.2934	-0.6643	2.036	-3.816
GBMLGG	TCGA-F6-A8O4-01	3.1077	1.3735	-2.3884	-3.1714	-1.0262	4.9496	-2.114	8.6196	1.7786	-4.035	-3.6259	-2.8262	-9.9658	-9.9658	-6.5064	-0.6416	-5.5735	-3.458	4.0189	-2.3884	3.4398	7.568	5.1899	-2.7274	-1.3183	3.5694	3.4958	0.4016	-1.7809	-3.3076	0.679	-6.5064	-9.9658	-3.6259	5.4453	-2.8262	-5.0116	2.8622	8.8786	0.1776	-6.5064	0.4125	-9.9658	-9.9658	-9.9658	-3.0469	2.8562	-9.9658
GBMLGG	TCGA-28-1753-01	4.61591	1.8604	-1.7322	-1.4699	0.9343	7.049	-0.4521	6.7494	5.0492	1.7954	1.1316	-2.4659	-9.9658	-3.816	-4.2934	0.8488	-0.7588	2.4386	5.8143	-0.7588	8.1522	7.1248	5.195	-1.8836	2.118	4.4483	5.5404	3.8054	1.125	0.9419	3.7138	-1.5105	1.4388	-0.0574	4.991	4.3285	2.6255	5.0828	9.0059	4.3406	-2.4659	2.6918	-9.9658	-9.9658	-3.816	-2.4659	2.2753	-9.9658
GBMLGG	TCGA-S9-A7R1-01	2.858	0.8726	-1.3921	-4.2934	-0.5332	4.5411	-3.1714	5.2384	1.0151	-2.5479	-3.6259	-1.7809	-9.9658	-5.0116	-5.5735	-0.5756	-1.9942	-3.0469	3.2944	-2.0529	3.0944	6.6115	4.9946	-1.685	-3.0469	2.9281	2.2901	-0.5973	-1.3183	-4.035	0.6517	-5.5735	-9.9658	-4.2934	5.4357	0.0718	-1.685	2.7314	8.5876	3.9626	-6.5064	-0.2328	-9.9658	-9.9658	-9.9658	-2.9324	3.1813	-9.9658
GBMLGG	TCGA-12-5295-01	4.80066	-0.2671	-2.9324	-3.816	0.4233	5.4822	-1.0559	6.192	4.6508	1.736	0.547	-9.9658	-1.685	-9.9658	-5.5735	-1.1811	-1.5951	-1.2142	5.1019	-2.7274	3.1062	7.5194	6.4762	-9.9658	1.7995	3.3206	3.9487	3.3032	0.605	-0.2671	1.8604	-2.3884	-1.1172	-2.8262	3.4477	6.8674	1.1382	3.6928	7.9234	2.4544	-3.0469	0.7664	-9.9658	-9.9658	-9.9658	-4.035	-0.9132	-9.9658
GBMLGG	TCGA-TM-A84M-01	4.05051	1.1706	-9.9658	-6.5064	-1.0559	5.5214	-3.816	5.9948	0.3115	-9.9658	-0.9686	-2.7274	-3.816	-9.9658	-9.9658	0.9268	-1.9379	-2.6349	5.0449	-2.3884	4.9737	6.5201	3.1162	-0.4719	-4.6082	4.8973	4.1069	-2.4659	0.0718	-4.035	-0.4521	-9.9658	-2.9324	-1.3548	6.432	-4.035	-4.2934	2.93	9.1543	1.46	-9.9658	-0.3201	-9.9658	-9.9658	-5.0116	-4.035	4.2266	-9.9658
GBMLGG	TCGA-HT-8107-01	2.62298	1.4065	-1.8314	-3.0469	0.9343	3.4945	-2.9324	4.3889	2.1476	-3.816	-4.035	-2.8262	-9.9658	-9.9658	-5.5735	-0.3383	-5.0116	-4.035	3.011	-3.6259	4.2906	6.4463	5.347	-4.6082	-2.6349	2.1702	2.3048	-0.4719	-2.1779	-3.458	1.8643	-9.9658	-9.9658	-3.3076	6.3607	0.6517	-3.458	2.7139	7.8153	2.4117	-9.9658	2.9674	-2.3884	-3.816	-5.5735	0.0014	5.1851	-9.9658
GBMLGG	TCGA-P5-A5ET-01	3.30746	2.2482	-4.6082	-5.5735	-1.2481	5.1306	-3.458	7.759	2.3592	-5.5735	-1.3183	-3.3076	-9.9658	-9.9658	-9.9658	-0.9686	-5.0116	-3.0469	4.5675	-2.8262	4.1724	7.3055	5.1478	-2.0529	-1.9942	3.7783	3.7226	0.1903	-0.7346	-5.5735	1.3956	-4.2934	-4.6082	-3.458	6.3873	-1.8314	-4.035	3.2496	8.9387	0.8883	-6.5064	1.6327	-9.9658	-9.9658	-5.5735	-2.6349	0.03	-9.9658
GBMLGG	TCGA-P5-A72W-01	2.29863	1.4652	-4.6082	-1.9942	-1.4699	5.1132	-4.035	6.8755	2.4386	-9.9658	-1.5522	-9.9658	-9.9658	-9.9658	-5.0116	-1.4699	-3.6259	-9.9658	4.9598	-3.816	2.3135	8.1088	4.892	-2.4659	-1.9379	2.9413	4.3562	-0.6193	-1.8836	-4.6082	0.9268	-5.5735	-9.9658	-5.0116	5.877	-2.114	-4.035	2.7444	8.4759	1.4859	-9.9658	1.1577	-9.9658	-9.9658	-9.9658	-2.6349	-0.7588	-9.9658
GBMLGG	TCGA-FG-A70Y-01	3.00178	1.5563	-2.6349	-4.6082	-1.2142	5.1098	-2.7274	7.3035	4.2958	-3.816	-1.1172	-2.8262	-9.9658	-9.9658	-9.9658	-0.6416	-4.035	-5.5735	5.7509	-3.816	3.603	7.6961	7.3651	-5.5735	-2.8262	2.3048	2.5263	-0.7834	-0.9686	-4.6082	1.8683	-9.9658	-9.9658	-2.9324	5.4983	-3.0469	-4.035	3.8054	7.924	1.674	-9.9658	2.4439	-9.9658	-5.0116	-9.9658	-2.3884	0.3907	-9.9658
GBMLGG	TCGA-TM-A84R-01	3.11939	1.949	-1.9379	-5.5735	0.2277	3.8064	-1.5105	5.1867	1.6649	-9.9658	-2.9324	-2.114	-9.9658	-9.9658	-5.5735	-1.6394	-4.035	-3.816	3.074	-3.6259	4.2442	6.7704	5.4266	-3.1714	-2.1779	3.1327	3.1797	-0.1031	-0.7108	-4.6082	1.2696	-9.9658	-4.6082	-9.9658	6.2899	-2.3884	-4.035	2.7508	8.0079	1.3679	-9.9658	2.7508	-9.9658	-9.9658	-9.9658	-3.0469	-0.3566	-9.9658
GBMLGG	TCGA-HW-A5KM-01	2.35896	0.5069	-3.6259	-2.3147	2.1147	5.7882	0.2762	7.8526	6.0065	2.1444	0.7407	-3.1714	-9.9658	-6.5064	-9.9658	3.1908	-1.4305	0.1903	6.4315	-2.6349	3.1426	7.1528	7.8997	-0.6193	0.0014	5.251	6.1863	1.7185	-1.4699	-4.2934	3.6961	-4.035	-5.0116	-0.3383	6.1651	6.1865	0.6517	4.9996	8.7583	3.2343	-3.3076	2.9432	-9.9658	-9.9658	-9.9658	-0.5543	2.971	-9.9658
GBMLGG	TCGA-HT-7477-01	4.32696	2.6984	-3.816	-3.3076	-0.6643	5.1619	-1.3183	6.9123	3.5073	-3.0469	-1.8836	-0.9132	-9.9658	-9.9658	-9.9658	1.6045	-2.5479	-2.5479	4.3931	-3.3076	6.1681	7.6288	5.3338	-1.1811	-1.0559	4.1748	4.5802	1.0711	-1.5951	-4.2934	2.1345	-9.9658	-2.9324	-1.5951	6.5154	2.4279	-0.6643	3.4358	8.9795	2.7249	-4.2934	1.9786	-4.2934	-9.9658	-9.9658	-2.114	2.0395	-9.9658
GBMLGG	TCGA-FG-A87Q-01	3.75704	1.9073	-0.1993	-1.5951	2.4198	5.318	-3.458	5.7602	5.3958	0.0718	-1.7809	-2.0529	-9.9658	-9.9658	-5.5735	-0.5125	-2.114	-1.9942	5.732	-1.5522	5.3248	7.6574	6.8693	-2.7274	1.0711	4.8375	5.5289	1.8363	0.346	-6.5064	2.2206	-3.1714	-3.0469	-3.3076	5.1684	7.1165	3.3952	4.0082	8.1314	4.0028	-3.0469	3.5887	-9.9658	-4.035	-2.8262	-0.7108	2.6348	-9.9658
GBMLGG	TCGA-FG-A70Z-01	3.88267	2.2237	-5.0116	-0.0574	0.1519	5.6364	-0.4131	6.6379	4.4176	-0.5543	-1.1488	-4.6082	-9.9658	-5.0116	-3.6259	-0.6416	-1.7322	-2.114	5.2315	-1.8314	4.8309	7.5317	6.1954	-2.4659	0.9115	3.9156	5.2404	1.7273	-0.3566	-3.0469	2.7292	-2.5479	-1.3921	-2.7274	5.7978	3.8611	2.2268	4.0127	8.1877	3.2752	-3.458	2.4117	-9.9658	-5.5735	-9.9658	-1.1488	2.4544	-9.9658
GBMLGG	TCGA-FG-A4MU-01	3.83184	1.6374	-1.7809	-1.8314	1.5661	6.8956	-1.4699	6.0828	4.5589	1.8564	0.7832	-2.0529	-3.6259	-5.0116	-5.5735	-0.4131	-0.7108	-0.6643	5.5907	-1.3183	10.0841	6.9098	5.8334	-1.5105	0.6425	4.4067	5.4209	1.9264	-1.3183	-3.1714	3.0876	-1.8314	-2.8262	-1.3183	4.9279	5.404	2.9319	4.3862	9.185	5.3292	-4.035	2.9432	-9.9658	-9.9658	-5.0116	-0.6873	2.4144	-9.9658
GBMLGG	TCGA-DB-A4XB-01	3.63108	1.9264	-4.6082	-2.9324	-0.3752	5.8357	-4.2934	8.5034	3.4358	-2.5479	-0.8599	-5.0116	-9.9658	-9.9658	-9.9658	-0.5543	-2.3884	-1.5951	4.5336	-2.4659	4.1053	6.9259	5.8912	-1.7809	-0.0425	4.3506	4.6059	1.125	0.3573	-5.5735	1.196	-4.035	-3.816	-9.9658	5.9819	0.537	-1.685	3.7116	8.9967	1.3623	-3.3076	1.4281	-9.9658	-9.9658	-9.9658	0.6425	5.6065	-9.9658
GBMLGG	TCGA-WY-A85D-01	2.57046	1.1512	-2.3147	-0.5543	-0.7108	4.402	-2.7274	7.0094	4.3744	-5.5735	-1.7322	-3.816	-9.9658	-9.9658	-9.9658	-0.6873	-5.0116	-3.6259	5.608	-2.3884	4.2343	7.7763	6.791	-2.3884	-3.6259	3.3521	3.8136	-1.1172	-1.8836	-9.9658	1.7744	-9.9658	-9.9658	-5.5735	5.7626	-3.0469	-5.5735	3.4318	8.6583	2.1798	-5.5735	0.6239	-9.9658	-9.9658	-9.9658	-0.5973	2.6441	-9.9658
GBMLGG	TCGA-FG-7641-01	3.12601	0.6517	-2.3147	-4.6082	-0.1031	4.4257	-3.1714	6.5129	1.6374	-9.9658	-2.0529	-2.2447	-9.9658	-9.9658	-9.9658	-1.5522	-5.5735	-5.0116	2.8661	-0.8084	4.3449	6.7134	4.7809	-2.0529	-3.458	4.2434	4.3378	-1.8836	-1.7809	-6.5064	0.2522	-9.9658	-4.6082	-9.9658	5.8994	-4.035	-4.2934	3.002	8.5526	0.5568	-9.9658	1.4808	-9.9658	-3.816	-9.9658	-3.3076	-0.5543	-9.9658
GBMLGG	TCGA-DU-5872-01	2.06695	1.6093	-3.458	-4.2934	0.679	4.9458	-2.7274	7.1272	3.0637	-2.7274	0.058	-9.9658	-9.9658	-6.5064	-4.6082	0.3685	-2.1779	-0.5332	4.3299	-2.2447	3.9929	7.4578	5.4725	-0.1665	0.099	4.2995	4.9407	2.1798	-0.2671	0.7233	1.8604	-3.816	-4.2934	-2.0529	6.5317	3.7324	-1.4305	3.4358	8.2425	2.9984	-6.5064	0.4016	-9.9658	-9.9658	-5.5735	-1.8836	3.0619	-9.9658
GBMLGG	TCGA-FG-6689-01	2.43023	0.9419	-6.5064	-5.5735	0.0158	4.6294	-2.5479	6.5949	4.1828	-9.9658	-0.8339	-4.035	-9.9658	-9.9658	-9.9658	-1.7322	-4.6082	-4.6082	4.8012	-2.9324	2.8622	6.8913	6.9122	-2.5479	-1.0262	3.6972	3.6905	0.9568	-1.2142	-5.5735	2.2144	-6.5064	-9.9658	-4.6082	6.1355	-2.2447	-5.5735	3.869	8.4453	2.8462	-5.5735	2.0742	-9.9658	-5.5735	-9.9658	-1.5522	3.3148	-9.9658
GBMLGG	TCGA-DB-5277-01	2.75487	2.1013	-9.9658	-4.6082	-1.0559	5.3664	-4.6082	6.9621	2.5972	-3.816	-2.9324	-2.9324	-4.035	-9.9658	-5.0116	0.2998	-3.816	1.1512	3.6771	-4.2934	3.8198	6.2126	5.2589	0.9343	-0.9971	4.1978	4.251	-0.1993	-0.6643	-1.6394	1.2934	-5.0116	-3.816	-3.1714	6.5278	0.9268	-1.2481	3.0757	8.604	2.8955	-5.5735	2.167	-4.2934	-9.9658	-5.5735	-4.2934	1.766	-9.9658
GBMLGG	TCGA-28-5204-01	4.46928	1.1577	-3.458	-4.035	2.1957	6.8576	-2.3884	6.4212	4.5577	0.4125	0.1124	-9.9658	0.8961	-3.3076	-3.6259	0.7321	-1.2481	-0.0425	5.3712	-2.9324	6.7312	7.6315	5.79	-3.1714	1.2756	4.7539	5.5543	2.8096	-0.1504	-3.0469	3.0568	-3.0469	0.3907	-1.4699	4.5826	7.0291	1.5612	4.8022	9.3822	3.1876	-4.2934	2.4492	-9.9658	-9.9658	-9.9658	-0.7588	2.5413	-9.9658
GBMLGG	TCGA-HT-A615-01	3.29281	1.6045	-4.2934	-3.1714	1.4335	5.0374	-0.1993	7.6127	4.4816	-3.3076	0.2881	-2.114	-9.9658	-9.9658	-9.9658	0.7748	-2.0529	0.044	4.7539	-0.0574	4.3385	6.8753	5.6843	-3.3076	1.5661	4.6118	5.5817	2.5731	-0.4521	-2.5479	2.2901	-2.114	-4.6082	-2.3884	5.741	2.1213	-1.5951	3.9709	8.8336	3.0602	-1.9942	2.6302	-9.9658	-9.9658	-5.0116	-1.5105	0.8961	-9.9658
GBMLGG	TCGA-DU-7301-01	2.78448	1.5998	-9.9658	-0.5332	0.2762	5.3086	-1.9942	7.3721	4.1708	-2.7274	-0.3566	-2.3884	-9.9658	-5.5735	-9.9658	-0.2328	-1.4699	0.4552	4.3744	-2.0529	4.4777	6.7852	5.6311	-0.9686	-0.8863	4.2965	6.1859	0.7999	-1.1811	-1.5105	2.2452	-4.6082	-2.7274	-2.1779	5.3234	-0.6193	-1.8314	3.871	8.4613	4.5448	-5.5735	2.4518	-9.9658	-9.9658	-9.9658	-0.7108	2.578	-9.9658
GBMLGG	TCGA-P5-A5EW-01	2.68928	1.6785	-5.5735	-0.9686	1.3567	5.8895	-3.6259	8.7116	4.1579	-9.9658	-0.4325	-4.2934	-9.9658	-5.5735	-9.9658	-0.2498	-1.5951	-4.6082	5.2434	-2.1779	4.47	7.3345	6.3363	-1.8314	-2.2447	3.3842	3.8808	1.5902	-0.9686	-2.9324	1.8957	-5.5735	-9.9658	-3.3076	6.5222	-2.4659	-4.6082	4.0985	8.7608	3.4264	-4.6082	1.3956	-9.9658	-9.9658	-5.0116	1.9931	5.3356	-9.9658
GBMLGG	TCGA-06-2569-01	4.65305	2.4883	-1.1172	-4.2934	-0.8599	7.3796	-1.1811	2.7657	0.6699	-1.5951	-3.0469	-5.0116	-4.035	-9.9658	-9.9658	2.5437	-5.0116	-4.035	2.1766	-4.6082	5.4893	6.9265	3.2405	-2.7274	1.949	3.3464	2.0912	0.2642	-0.5543	-2.0529	1.2394	-5.5735	-9.9658	-6.5064	2.5756	0.0718	-5.5735	4.14	8.5638	1.5854	-9.9658	-0.4921	-9.9658	-9.9658	-9.9658	-9.9658	-1.685	-3.816
GBMLGG	TCGA-HT-A5RB-01	2.45941	2.0325	-3.816	-4.6082	-0.3752	4.6905	-2.7274	8.0739	2.183	-3.458	-2.8262	-3.6259	-9.9658	-9.9658	-9.9658	-0.394	-4.035	-3.1714	3.6054	-3.1714	5.4654	6.6418	5.2149	-0.5543	-3.458	3.3017	3.154	-1.1811	-1.8836	-2.5479	1.614	-5.5735	-4.6082	-5.5735	5.5107	-3.0469	-1.5105	3.1588	8.6721	1.0573	-9.9658	0.6608	-9.9658	-9.9658	-9.9658	-1.4305	2.8158	-9.9658
GBMLGG	TCGA-E1-A7YN-01	2.75913	1.2394	-1.1811	-0.1993	1.7185	5.8061	0.6239	4.9141	5.7822	0.1257	2.8402	-0.5973	-1.2828	-9.9658	-4.2934	6.1169	1.8996	1.2271	5.9914	1.7229	5.4932	7.7287	7.6471	-3.458	3.0585	6.1965	6.765	6.0745	2.4306	0.4657	3.6018	-0.4131	-1.3183	2.4544	5.1631	5.2851	0.044	4.2212	8.489	4.2781	-0.2845	3.9746	-9.9658	-4.6082	-3.816	-1.8836	0.4447	-9.9658
GBMLGG	TCGA-27-1830-01	3.55826	1.2023	-1.0559	-1.9379	0.7916	6.7757	-1.0559	5.7677	4.5856	-2.1779	2.0395	-0.7346	-9.9658	-3.816	-5.5735	1.4011	-0.4521	-0.5973	5.5763	-1.2142	8.7033	6.8071	6.0007	-0.4325	2.4753	5.1429	4.9379	3.6691	-0.3022	-3.458	2.8482	-1.8836	-0.1345	-3.0469	4.9846	2.578	0.3907	4.197	8.2933	4.7367	-2.9324	2.5213	-9.9658	-9.9658	-9.9658	0.7233	5.6326	-9.9658
GBMLGG	TCGA-QH-A6XC-01	3.46464	1.46	-1.3921	-3.0469	0.3573	5.5154	-5.0116	6.2531	3.3421	-2.5479	-3.816	-2.5479	-9.9658	-4.6082	-5.5735	-1.8314	-3.458	-4.035	5.037	-3.6259	4.7523	7.4062	6.2089	-9.9658	-1.8314	3.5815	4.6588	0.2029	-2.3147	-5.0116	1.3225	-5.5735	-2.2447	-4.6082	5.5438	3.1426	-0.4521	3.002	8.8858	3.325	-5.0116	2.2513	-9.9658	-5.0116	-9.9658	-2.2447	1.614	-9.9658
GBMLGG	TCGA-06-2559-01	4.79073	1.884	-1.7809	-1.2828	2.578	7.2255	-1.3548	5.172	4.3889	-2.2447	0.547	-2.7274	-9.9658	-9.9658	-9.9658	1.1897	-0.5125	-0.7108	4.836	-3.816	10.297	7.3103	5.1555	-3.458	-0.0877	4.4101	4.7981	1.5758	-0.7108	0.2522	2.7336	-3.3076	-1.7322	-0.4719	4.5657	3.483	0.3573	4.8992	9.4391	4.0653	-4.2934	2.7227	-9.9658	-4.6082	-9.9658	0.044	3.5535	-9.9658
GBMLGG	TCGA-S9-A6WN-01	3.18747	0.6425	-3.6259	-3.6259	3.9801	5.9423	2.5061	4.0532	4.0994	0.058	-1.2828	-4.035	-9.9658	-9.9658	-4.2934	-1.5105	-1.2481	-0.8084	5.5043	1.0151	5.2899	7.3596	6.7678	-0.1187	0.5568	4.5091	5.5423	1.8524	0.6608	-1.0559	1.8996	-1.7322	1.105	-1.0862	5.4273	1.7702	-0.2328	3.9965	8.6424	6.1633	-3.1714	2.1862	-4.2934	-9.9658	-9.9658	-1.8314	1.4704	-9.9658
GBMLGG	TCGA-06-0139-01	1.99635	1.7744	-0.1187	-1.685	1.7185	6.2267	-0.7108	4.0901	6.7909	1.6649	4.1563	-3.1714	-2.3147	-9.9658	-2.9324	0.8164	-0.4921	1.6964	6.0624	-0.2671	6.7331	6.8856	6.7005	-3.458	4.0653	4.5547	4.7955	3.9783	1.7403	0.7493	4.3625	-2.0529	1.683	-0.7108	2.6325	5.6671	4.6882	5.2476	7.3561	4.5602	-0.6416	1.9149	-9.9658	-9.9658	-1.5105	1.0573	4.6742	-3.1714
GBMLGG	TCGA-DB-A64L-01	2.46464	1.3454	-1.0862	-3.3076	0.044	4.0584	-3.1714	5.2552	2.5536	-2.9324	-1.1811	-2.6349	-9.9658	-9.9658	-9.9658	-0.6193	-1.6394	-1.3921	3.4277	-1.3548	3.9089	6.7063	5.8902	-9.9658	1.2992	4.3548	4.3834	2.6114	0.0854	-2.5479	1.4335	-4.2934	-9.9658	-1.9379	5.5123	0.6332	0.044	2.5288	8.0779	1.683	-5.5735	0.3115	-9.9658	-9.9658	-5.0116	-1.3921	3.9374	-9.9658
GBMLGG	TCGA-TM-A84I-01	4.0695	1.8643	-9.9658	-2.9324	-0.8599	5.5913	-1.7322	5.8814	3.2405	-5.5735	-0.8599	-1.9379	-9.9658	-9.9658	-9.9658	-0.9971	-2.8262	-2.8262	4.481	-3.0469	4.4257	6.5597	5.1268	0.2998	-0.2845	4.7274	4.2103	0.9862	-0.5973	-6.5064	1.4441	-3.816	-9.9658	-3.6259	5.2265	0.5666	-2.3147	3.0978	9.0772	2.609	-5.5735	1.1316	-9.9658	-9.9658	-9.9658	-0.5756	3.2065	-9.9658
GBMLGG	TCGA-QH-A6CZ-01	3.71588	1.5415	-2.7274	-9.9658	-0.8599	4.6018	-3.816	5.5154	2.2268	-9.9658	-2.3884	-3.6259	-9.9658	-9.9658	-5.5735	-0.4921	-2.9324	-4.2934	3.9874	-3.816	4.756	7.3219	4.842	-4.035	-3.1714	3.4804	3.8847	-1.1488	-0.9132	-2.7274	0.7493	-5.5735	-9.9658	-9.9658	5.1815	-5.0116	-4.035	3.1572	8.7805	-0.0574	-6.5064	0.2029	-9.9658	-5.0116	-9.9658	-1.2481	4.2563	-9.9658
GBMLGG	TCGA-WY-A858-01	1.97089	1.3167	-5.5735	-3.3076	-0.6873	4.6882	-2.114	6.5003	4.2404	-5.0116	-2.3147	-3.1714	-9.9658	-9.9658	-9.9658	-0.2328	-3.1714	-3.816	5.442	-2.7274	3.8531	7.3579	6.8292	-2.7274	-0.6193	3.0842	3.3336	0.9789	-1.4699	-1.9942	2.7508	-4.6082	-5.0116	-3.0469	5.0431	-1.9942	-2.5479	3.6804	8.1756	1.5266	-5.0116	2.328	-5.0116	-9.9658	-9.9658	-1.9942	0.5763	-9.9658
GBMLGG	TCGA-VM-A8CB-01	3.42359	2.1766	-1.9379	-5.5735	-1.6394	4.6899	-3.816	1.683	1.7828	-9.9658	-4.2934	-2.8262	-9.9658	-9.9658	-9.9658	-0.3383	-9.9658	-4.2934	2.2144	-4.6082	3.9983	8.0745	4.7464	-4.2934	-1.4305	5.2939	5.0392	0.1519	-0.0877	-6.5064	0.1388	-9.9658	-9.9658	-4.035	4.9901	0.7748	-1.5105	3.2405	8.8534	1.0915	-5.0116	-0.3201	-9.9658	-9.9658	-9.9658	-5.0116	-1.1488	-9.9658
GBMLGG	TCGA-27-2526-01	2.87379	0.537	-2.7274	-3.0469	0.5955	4.9127	-0.6643	5.9725	3.7635	0.2277	-1.7322	-4.6082	-9.9658	-9.9658	-5.5735	-0.0725	-0.3566	0.099	4.7549	-1.7809	4.8827	7.6824	5.4611	-5.5735	3.3492	4.1078	5.1173	4.686	1.1316	-2.3884	2.6161	-2.4659	-0.5332	-1.9379	4.7555	5.4611	3.3321	3.6916	8.8171	2.9784	-1.4699	-1.7322	-9.9658	-9.9658	-2.8262	-2.6349	0.6517	-9.9658
GBMLGG	TCGA-VM-A8CF-01	1.91456	0.8488	-3.816	0.8883	-0.5332	4.2654	-2.2447	5.3374	4.7421	-4.2934	-1.3548	-5.0116	-9.9658	-9.9658	-9.9658	-0.0425	-3.1714	-0.6416	5.726	-3.3076	1.3846	8.9692	5.717	-9.9658	0.3573	1.934	3.1701	2.1798	-1.3183	-6.5064	2.5087	-9.9658	-3.0469	-3.6259	3.506	-0.8599	-4.6082	3.1939	7.8227	2.5634	-9.9658	1.4174	-9.9658	-9.9658	-9.9658	-1.5951	0.0158	-9.9658
GBMLGG	TCGA-06-5856-01	3.90786	2.0465	-2.3147	-0.9686	1.884	6.8891	-2.1779	6.0781	4.7077	-2.4659	0.2029	-2.114	-2.9324	-3.458	-3.0469	0.7407	-1.5105	-0.3566	5.0423	-1.2481	8.1547	6.9431	5.1672	-2.3884	1.3109	4.0619	4.4816	1.8201	-1.0559	-1.0862	3.2236	-5.5735	-1.3548	-1.5951	5.1835	3.6136	-0.6193	5.0059	8.5597	3.0774	-5.0116	0.9642	-9.9658	-9.9658	3.623	-1.2481	3.1112	-9.9658
GBMLGG	TCGA-HT-7608-01	3.15866	0.6425	-9.9658	-6.5064	-0.5973	3.9012	-2.3884	7.4454	2.5163	-9.9658	-2.0529	-9.9658	-9.9658	-9.9658	-9.9658	-3.816	-3.816	-5.5735	3.5766	0.5955	4.1531	7.6274	7.3555	-4.6082	-3.0469	3.4791	3.9213	-0.6193	-2.2447	-2.2447	2.1378	-9.9658	-4.035	-4.6082	4.3242	-1.4699	-4.035	3.3966	8.343	1.8801	-9.9658	0.058	-9.9658	-9.9658	-9.9658	-0.2671	4.2803	-9.9658
GBMLGG	TCGA-CS-4938-01	3.0179	1.0079	-4.2934	-4.035	-0.0877	5.4699	-6.5064	8.5296	4.001	-9.9658	0.9862	-5.5735	-9.9658	-9.9658	-9.9658	-1.9379	-9.9658	-4.2934	4.8944	-2.1779	3.6312	7.2043	5.878	-2.9324	-2.3147	3.5073	4.322	0.9268	-1.5105	-4.6082	1.3735	-5.5735	-3.3076	-9.9658	5.7658	-4.2934	-4.2934	3.573	8.6984	2.2113	-9.9658	-0.1993	-9.9658	-9.9658	-5.5735	-0.8339	1.7575	-9.9658
GBMLGG	TCGA-QH-A6X5-01	2.69824	0.679	-3.1714	-5.5735	-1.3183	4.3681	-3.3076	6.9093	2.7314	-5.5735	-5.5735	-2.5479	-9.9658	-9.9658	-5.5735	-0.9406	-5.0116	-6.5064	4.2009	0.24	4.1506	7.5454	5.5348	-2.7274	-3.6259	3.0515	4.0136	-0.5973	-1.5105	-9.9658	0.9493	-9.9658	-4.6082	-3.458	5.1914	-2.1779	-2.3147	3.1765	8.8575	0.679	-9.9658	3.2766	-9.9658	-9.9658	-5.0116	-4.035	-0.394	-9.9658
GBMLGG	TCGA-DU-8166-01	2.81764	1.5902	-1.0559	-4.6082	1.3846	5.7439	-2.7274	8.561	4.1931	-3.458	-0.9971	-2.1779	-9.9658	-9.9658	-9.9658	-0.4325	0.1388	-4.035	4.7851	-1.9379	3.6612	6.5336	5.7293	-0.3201	-1.8314	4.585	4.8992	-0.5543	-1.9379	-2.8262	2.2633	-3.458	-2.9324	-0.9971	6.8268	1.7141	-3.816	4.6159	9.1632	5.7679	-6.5064	2.1862	-9.9658	-9.9658	-9.9658	2.6138	6.5491	-9.9658
GBMLGG	TCGA-HT-8018-01	3.10435	2.3251	-2.6349	-1.9942	0.5763	5.2434	-0.6416	6.0635	4.2951	-0.5756	1.6466	-1.4699	-9.9658	-9.9658	-9.9658	0.1519	-0.8863	-1.0262	4.8939	-0.9406	4.6352	6.4175	6.9429	-2.8262	1.0151	4.5085	4.9869	2.96	0.1257	-1.3548	3.0145	-1.8314	-2.1779	-0.9406	6.5015	2.8502	2.5487	4.2862	8.1866	3.8551	-2.5479	1.7097	-9.9658	-9.9658	-5.5735	-0.1504	4.6888	-5.0116
GBMLGG	TCGA-DU-7292-01	3.47892	1.2516	-2.4659	-4.2934	0.2998	5.8687	-3.458	5.8689	2.5948	-5.5735	-4.035	-4.035	-1.2142	-9.9658	-9.9658	-2.2447	-3.458	-3.816	4.1061	-3.1714	4.0037	7.2035	5.6002	-6.5064	-1.1488	3.7971	4.9055	1.2516	-0.7588	-5.5735	1.3735	-9.9658	-3.816	-4.6082	6.3056	1.3956	-0.5543	3.4596	8.2007	3.0568	-9.9658	1.4911	-9.9658	-5.5735	-9.9658	-2.3147	0.1257	-9.9658
GBMLGG	TCGA-S9-A6TU-01	1.89914	2.0147	-3.458	-3.6259	-0.3201	4.9626	-2.9324	6.9077	3.7324	-9.9658	-0.7346	-3.1714	-9.9658	-9.9658	-9.9658	-0.3752	-3.6259	-6.5064	5.1429	-2.9324	4.1136	7.0495	6.8741	-1.7809	-3.458	3.1475	4.2676	-0.1031	-1.8314	-4.6082	1.4174	-4.6082	-9.9658	-5.0116	5.6829	-2.3884	-5.5735	3.3364	8.5944	2.5137	-9.9658	1.8036	-9.9658	-9.9658	-5.5735	-2.3884	4.9796	-9.9658
GBMLGG	TCGA-DB-A75P-01	2.31325	1.7828	-1.7322	-6.5064	1.1184	5.824	-4.6082	5.569	2.6161	-9.9658	-1.6394	-2.8262	-9.9658	-5.5735	-5.5735	-0.8599	-1.6394	-1.7322	4.7448	-3.6259	3.9847	7.7046	6.3234	-3.816	0.7058	3.5706	4.1343	3.4687	-0.6416	-4.6082	2.0254	-1.9379	-5.0116	-5.5735	6.3447	-0.7108	-2.4659	2.8055	8.2849	1.7575	-5.5735	1.3567	-9.9658	-9.9658	-9.9658	-2.4659	0.3907	-9.9658
GBMLGG	TCGA-06-5418-01	3.55459	0.5271	-0.3566	-3.6259	1.6093	6.5042	-3.6259	6.0339	4.6352	-2.3884	1.2516	-4.2934	-9.9658	-9.9658	-9.9658	-1.8836	-3.458	-1.5105	5.5638	-3.816	10.1762	7.429	5.1177	-3.816	-1.2142	4.2616	3.7204	1.196	-0.5125	-2.7274	2.5731	-4.6082	0.2522	-1.7322	4.1788	2.9432	-4.035	4.248	8.7618	4.3321	-4.6082	1.3623	-9.9658	-9.9658	-5.0116	0.7999	3.6827	-9.9658
GBMLGG	TCGA-FG-6691-01	3.58133	1.0363	-1.1172	-3.6259	0.3231	5.6174	-5.0116	8.3191	5.5886	-9.9658	-3.3076	-4.035	-9.9658	-9.9658	-9.9658	0.1388	-2.9324	-6.5064	5.6918	-2.3147	3.5779	7.0182	7.8197	-1.4305	-2.2447	3.7625	5.1169	0.9038	-1.7322	-3.3076	2.0325	-9.9658	-9.9658	-5.5735	4.8734	-0.8599	-4.035	4.9796	9.0569	3.1062	-6.5064	1.8996	-9.9658	-9.9658	-9.9658	-2.0529	2.167	-9.9658
GBMLGG	TCGA-DU-6399-01	3.43829	1.3109	-9.9658	-3.6259	-0.3566	5.1599	-3.3076	8.1963	4.4404	-9.9658	-2.5479	-4.035	-9.9658	-9.9658	-5.5735	0.03	-3.1714	-2.114	5.2891	-2.9324	3.8561	7.2433	6.8235	-1.1811	-1.1172	3.8769	3.868	1.1316	-2.5479	-4.2934	2.5288	-5.0116	-9.9658	-3.3076	5.306	-1.1811	-2.0529	4.2951	8.8904	1.7744	-6.5064	0.7058	-9.9658	-5.5735	-9.9658	-1.685	2.5363	-9.9658
GBMLGG	TCGA-S9-A7IQ-01	2.90113	1.5806	-1.0862	-4.6082	0.1519	4.1219	-3.3076	6.1997	1.4011	-9.9658	-5.5735	-3.6259	-9.9658	-9.9658	-9.9658	-0.9686	-5.0116	-9.9658	3.421	-1.9379	3.9496	6.887	5.6407	-3.458	-2.8262	2.9356	3.0376	-1.6394	-1.7322	-3.458	1.5216	-9.9658	-3.816	-4.6082	6.7208	-4.2934	-4.6082	2.6602	8.1435	-0.0425	-9.9658	0.9568	-9.9658	-9.9658	-5.5735	-2.3147	1.7575	-9.9658
GBMLGG	TCGA-06-5414-01	3.90497	1.5514	-0.7588	-2.114	2.0673	6.7054	-1.7809	5.2358	4.8924	1.9111	-0.5125	-4.2934	-0.5125	-9.9658	-5.5735	-1.7322	-1.8314	-1.2481	6.3579	-2.9324	7.3019	7.1216	5.7642	-5.0116	0.679	4.9631	5.857	2.5683	-0.5973	-1.0262	2.9637	-2.9324	1.3735	-1.8836	5.7436	4.7421	1.0151	4.5079	8.7924	5.6035	-3.6259	3.2405	-9.9658	-9.9658	-9.9658	-0.4131	3.8521	-4.035
GBMLGG	TCGA-S9-A6WI-01	2.47251	1.8604	-1.6394	-3.816	-0.0877	3.4984	-3.1714	4.7714	2.236	-9.9658	-5.0116	-3.1714	-9.9658	-9.9658	-9.9658	-0.7108	-4.2934	-2.8262	3.208	-4.035	3.7992	6.6868	5.1764	-3.1714	-1.685	2.3479	2.3337	-0.3201	-1.2142	-4.6082	1.5064	-9.9658	-3.6259	-6.5064	6.2568	-1.1488	-2.8262	2.4439	8.042	1.7995	-6.5064	3.4411	-2.7274	-9.9658	-9.9658	-0.1345	4.4516	-9.9658
GBMLGG	TCGA-DB-A64S-01	2.54846	1.3397	-1.9942	-1.3921	-0.6873	5.2285	-0.8084	7.9781	4.773	-4.6082	1.2934	-9.9658	-9.9658	-9.9658	-9.9658	0.0158	-2.3147	-3.458	5.166	-2.3147	4.7296	7.3981	6.6054	-2.7274	-0.7346	3.8876	4.7274	1.1833	-0.8863	-2.9324	2.0979	-9.9658	-2.2447	-2.8262	6.2617	-1.0559	-4.035	3.6405	8.85	3.0876	-5.5735	2.0289	-9.9658	-9.9658	-5.0116	0.2998	5.63	-9.9658
GBMLGG	TCGA-FG-6692-01	3.71366	2.2693	-2.5479	-1.9942	-0.4719	7.0937	-1.7322	5.4397	3.0145	0.7407	-0.5125	-2.114	-0.5756	-9.9658	-4.6082	0.6608	-1.5105	-0.5125	4.585	-2.0529	6.8912	7.4679	4.1417	-3.816	1.7316	4.5072	5.8832	4.2243	-0.0425	-1.9942	1.7912	-2.0529	-4.2934	-3.3076	5.067	5.3615	1.5758	3.402	8.3693	4.1571	-3.6259	2.043	-9.9658	-9.9658	-5.5735	-3.3076	0.6517	-4.2934
GBMLGG	TCGA-HW-7489-01	2.858	1.6649	-1.2828	-4.6082	0.3115	4.5249	-2.6349	6.4295	2.8916	-9.9658	-0.8863	-3.6259	-3.1714	-9.9658	-9.9658	-1.0262	-9.9658	-6.5064	4.1867	-3.0469	3.0978	6.9724	6.607	-2.3884	-2.3884	3.2781	3.7017	-0.9971	-1.6394	-5.5735	1.9638	-4.6082	-4.035	-4.2934	6.1353	-1.7322	-5.5735	2.9674	8.2929	1.2875	-9.9658	1.5612	-9.9658	-9.9658	-9.9658	-1.4305	4.0601	-9.9658
GBMLGG	TCGA-R8-A6YH-01	3.31034	1.46	-9.9658	-2.3884	-1.9379	5.6247	-9.9658	6.7895	2.6325	-5.0116	-1.685	-3.0469	-9.9658	-9.9658	-9.9658	-1.0262	-5.0116	-4.035	4.7318	-4.2934	4.0001	7.0007	6.1031	0.4967	-3.1714	3.2435	3.834	-1.0559	-1.4699	-5.5735	0.7748	-5.5735	-3.816	-6.5064	4.891	-5.0116	-4.035	3.0654	8.9855	1.9377	-9.9658	0.6608	-9.9658	-9.9658	-9.9658	-1.685	5.174	-9.9658
GBMLGG	TCGA-06-5417-01	3.94673	0.1903	-2.5479	-0.7834	-0.4325	5.3424	-9.9658	6.6153	2.9128	-9.9658	-2.7274	-2.4659	-9.9658	-9.9658	-9.9658	-1.0559	-2.9324	-9.9658	3.695	-2.3147	7.0597	7.1317	5.1518	-1.6394	-1.685	4.7688	4.8007	-0.9406	-2.9324	-5.0116	1.3956	-9.9658	-9.9658	-2.3884	5.4128	0.1388	-2.1779	3.8611	8.016	1.2756	-9.9658	-0.8339	-9.9658	-9.9658	-9.9658	0.044	-0.013	-9.9658
GBMLGG	TCGA-HT-A618-01	2.44623	1.766	-3.816	-4.6082	0.8082	5.0189	-2.114	7.902	4.837	-3.3076	0.517	-2.7274	-9.9658	-9.9658	-4.6082	-0.3022	-3.3076	-1.8314	5.6442	-2.0529	3.8218	7.5523	7.0143	-2.4659	2.0218	4.7608	5.7816	1.8604	-0.7346	-3.6259	2.9338	-3.3076	-3.0469	-2.8262	5.1359	2.4701	-0.5756	4.0593	8.5463	3.449	-3.458	3.4451	-9.9658	-9.9658	-9.9658	0.5763	4.5161	-9.9658
GBMLGG	TCGA-26-5134-01	2.27795	-1.5522	-9.9658	-5.5735	-2.9324	3.6657	-9.9658	2.4753	1.3791	-1.8836	-3.6259	-4.6082	-9.9658	-9.9658	-5.5735	-1.1488	-4.2934	-2.6349	2.3508	-3.1714	6.6133	4.7027	1.5854	-4.035	-1.3183	1.3567	2.1378	-0.5332	-3.6259	-1.5951	0.4016	-6.5064	1.9111	-4.2934	1.9822	1.3511	0.3907	0.688	6.351	-0.013	-9.9658	-0.6643	-9.9658	-9.9658	-5.5735	-3.3076	-0.0725	-9.9658
GBMLGG	TCGA-QH-A65S-01	2.17313	1.105	-3.0469	-3.3076	-0.3383	4.3744	-2.3147	6.3707	4.0918	-3.458	-0.7834	-3.0469	-9.9658	-9.9658	-9.9658	-0.9406	-9.9658	-2.8262	4.591	-1.9379	2.6805	7.8162	6.4497	-1.4305	-3.458	3.0927	4.208	0.5763	-2.0529	-5.0116	1.4335	-9.9658	-3.458	-9.9658	5.6445	-3.0469	-3.6259	3.3379	8.7934	1.7229	-9.9658	1.5998	-9.9658	-9.9658	-5.0116	-3.0469	-1.3548	-9.9658
GBMLGG	TCGA-DU-7019-01	2.45678	1.4652	-2.2447	-3.3076	0.2277	5.4572	-2.9324	8.8109	3.5971	-3.3076	-0.9971	-9.9658	-9.9658	-5.5735	-4.6082	-2.1779	-2.3147	-1.9379	4.5355	-2.2447	4.6236	7.0084	5.8004	-2.6349	0.3796	4.3765	4.3492	1.7446	-1.4305	-2.3884	2.5852	-3.6259	-3.6259	-2.8262	6.7974	1.4911	0.7579	4.0436	8.6822	4.1119	-5.5735	2.0673	-9.9658	-9.9658	-5.5735	-0.7108	3.0825	-9.9658
GBMLGG	TCGA-76-4925-01	4.62407	0.2029	-2.3884	-2.8262	1.4756	7.1401	-3.6259	7.2856	3.1813	-2.4659	-1.0862	-2.4659	-9.9658	-9.9658	-9.9658	-0.5543	-6.5064	-1.9379	4.4476	-3.3076	9.6405	7.9811	3.0791	-3.816	-1.1172	3.7688	4.565	1.5266	-1.0262	-2.6349	2.1509	-5.0116	-3.1714	-3.458	3.9892	2.4144	0.058	3.7345	9.3856	5.554	-4.2934	0.1519	-9.9658	-9.9658	-9.9658	-0.0277	3.0619	-9.9658
GBMLGG	TCGA-DU-A7TJ-01	4.39641	1.9822	-9.9658	-2.3147	0.7058	6.8097	-2.5479	8.2476	4.1498	-2.1779	0.2154	-1.5522	-1.2828	-9.9658	-9.9658	-1.2828	-2.9324	-1.5105	5.427	-2.8262	5.9941	7.2449	5.2491	-3.458	0.1124	5.1177	6.325	1.3791	-0.5125	-3.0469	2.2175	-2.2447	-4.6082	-1.8836	6.09	1.9149	-0.2328	4.0909	9.3647	4.2373	-4.035	1.8201	-9.9658	-9.9658	-4.2934	-1.0559	1.5806	-9.9658
GBMLGG	TCGA-TM-A84H-01	2.68262	1.5216	-0.8339	-3.816	-0.0877	5.2048	-3.816	6.3496	3.1475	-9.9658	-0.4921	-1.7322	-3.0469	-9.9658	-9.9658	0.7233	-2.9324	-5.5735	4.9556	-2.3147	4.4283	6.9148	6.3282	0.605	-1.7809	4.6702	3.1781	-1.1811	-0.2159	-6.5064	1.5216	-9.9658	-9.9658	-5.0116	4.9184	-4.2934	-9.9658	3.1011	8.7573	2.7357	-6.5064	0.044	-9.9658	-9.9658	-9.9658	-2.6349	0.2029	-9.9658
GBMLGG	TCGA-28-2510-01	3.76974	1.8282	-2.3147	-5.5735	1.0222	6.1741	-1.4699	4.4919	3.7378	-3.1714	-0.2671	-1.685	-9.9658	-9.9658	-9.9658	-1.3921	-2.6349	-1.8314	4.7866	-3.1714	7.584	7.0343	6.0374	-3.816	0.3231	3.4411	3.2602	1.5854	-1.3921	-1.685	2.5388	-3.816	-2.3147	-2.8262	5.7293	1.0983	-1.8314	3.981	8.3473	3.9856	-5.5735	2.9655	-9.9658	-9.9658	-9.9658	-1.4305	3.0791	-9.9658
GBMLGG	TCGA-S9-A7R8-01	3.16026	1.6045	-9.9658	-2.5479	-0.5973	5.1704	-1.5105	5.7189	4.067	-5.5735	0.547	-1.9942	-9.9658	-9.9658	-9.9658	0.1257	-3.458	-4.6082	5.1748	-2.1779	4.2001	7.0332	6.195	-0.2845	-3.458	5.0286	5.0888	-1.8314	-1.0862	-3.816	1.5216	-9.9658	-4.2934	-3.3076	4.8263	-2.9324	-6.5064	4.1515	8.9403	1.5165	-4.6082	2.0147	-9.9658	-9.9658	-9.9658	-5.5735	-0.2845	-9.9658
GBMLGG	TCGA-S9-A7R4-01	2.41951	2.3732	-2.8262	-3.0469	-0.1345	4.9421	-2.114	7.2214	3.9137	-3.6259	-0.9406	-3.6259	-9.9658	-9.9658	-9.9658	-0.9132	-1.0262	-4.6082	5.1989	-3.6259	4.5886	7.0365	6.4793	-1.8836	-3.1714	3.3731	3.8481	-1.1488	-1.4699	-2.3884	2.3479	-9.9658	-5.0116	-2.0529	5.8729	-1.685	-2.7274	4.4654	8.7045	2.6395	-9.9658	0.8488	-9.9658	-5.0116	-5.5735	-0.2328	4.7491	-9.9658
GBMLGG	TCGA-S9-A7J3-01	3.58133	1.7273	-2.8262	-4.6082	-0.3383	4.9978	-4.2934	6.522	3.5535	-9.9658	-1.6394	-2.9324	-9.9658	-5.5735	-9.9658	-0.9406	-1.0862	-1.685	4.5886	0.1124	4.8314	7.2031	6.3142	-2.9324	-1.1172	4.443	4.2503	0.0158	-0.5332	-5.0116	1.6187	-9.9658	-5.0116	-6.5064	5.7277	1.46	-1.1488	3.4304	8.4617	3.6393	-9.9658	3.1669	-9.9658	-5.5735	-9.9658	-2.5479	1.2696	-9.9658
GBMLGG	TCGA-TM-A84L-01	2.84998	2.2723	-3.816	-0.1031	0.5955	5.0497	-1.5105	6.8234	4.3903	-4.2934	-0.7588	-0.7346	-9.9658	-9.9658	-9.9658	0.5271	-3.3076	-3.458	5.6893	-1.1172	4.1676	7.6038	6.6765	-1.8836	-0.9406	4.1285	3.6589	0.9935	-1.685	-3.816	2.4465	-5.5735	-9.9658	-4.6082	5.4832	-2.114	-2.5479	3.6827	8.2414	3.1245	-6.5064	1.5216	-9.9658	-9.9658	-5.0116	0.8726	4.5217	-9.9658
GBMLGG	TCGA-E1-A7YH-01	2.55584	2.2573	-4.6082	-1.7322	-0.7834	4.551	-2.4659	6.0736	3.8759	-9.9658	-3.1714	-1.2828	-9.9658	-9.9658	-9.9658	0.1388	-4.035	-6.5064	5.5961	-3.458	3.7688	6.7155	6.9409	-3.0469	-9.9658	3.3163	4.0977	-2.0529	-1.685	-5.5735	1.1577	-9.9658	-5.0116	-9.9658	5.5769	-5.5735	-6.5064	3.0995	8.5681	1.2085	-9.9658	2.4701	-9.9658	-5.5735	-9.9658	-2.4659	0.4967	-9.9658
GBMLGG	TCGA-06-5413-01	4.18585	1.7185	-1.5951	-0.5125	0.0854	6.7772	-1.1488	6.1215	4.8817	0.1903	2.8974	-3.1714	-1.5522	-5.5735	-5.5735	-0.2328	-0.8599	0.3115	5.1334	-1.1811	6.1918	7.0921	5.6398	-1.8836	3.0181	4.582	5.193	3.4622	1.0079	-0.7834	4.0713	-3.458	-0.5543	-1.5522	5.104	4.6071	0.9493	5.2138	9.5839	3.6405	-1.9942	1.3846	-9.9658	-9.9658	-4.035	0.4447	3.6195	-9.9658
GBMLGG	TCGA-06-0646-01	4.21649	1.5902	-2.0529	-2.5479	1.4808	6.5953	-3.458	6.0928	5.5763	-0.1665	1.3679	-2.5479	-3.6259	-9.9658	-9.9658	1.1447	-2.114	-0.3566	5.5778	-0.3201	9.9948	7.4019	5.5088	-2.2447	0.8246	4.5299	4.5311	2.3106	0.03	-3.3076	3.5387	-2.4659	-0.6416	0.1648	5.2392	4.4861	0.5763	4.3285	8.3501	6.6193	-4.035	3.1045	-9.9658	-9.9658	-4.035	1.5316	6.6963	-9.9658
GBMLGG	TCGA-P5-A5EV-01	3.43166	1.9302	-9.9658	-2.9324	-0.3383	5.2056	-3.3076	7.2186	3.3787	-5.0116	-1.685	-4.2934	-9.9658	-2.8262	-5.5735	-1.2481	-5.0116	-1.3548	4.728	-1.685	4.3328	8.2208	6.2169	-1.4699	0.044	3.9365	4.1628	1.9895	-1.0862	-5.0116	1.7744	-9.9658	-4.6082	-9.9658	5.725	0.4552	2.3077	3.5657	8.6833	1.4388	-6.5064	0.3573	-9.9658	-9.9658	-5.5735	-1.9942	0.5271	-9.9658
GBMLGG	TCGA-DU-A7TD-01	4.2979	2.3732	-2.5479	-2.6349	1.9895	6.8758	-1.6394	5.8568	5.2821	2.9747	1.3283	-2.3884	-1.7322	-9.9658	-5.5735	1.0503	0.1124	-0.4131	5.6448	-2.114	6.778	7.5544	5.5546	-3.6259	1.1512	6.0898	6.0726	2.4623	0.5666	-1.4699	2.9013	-2.3147	-2.8262	-0.5973	4.6933	6.734	1.6234	4.9127	9.419	4.1796	-3.1714	2.6873	-9.9658	-9.9658	-3.816	1.8484	5.393	-9.9658
GBMLGG	TCGA-HW-A5KL-01	2.15053	1.7185	-3.6259	-4.6082	-0.9971	4.7453	-2.3884	7.1949	3.4543	-9.9658	-1.2481	-2.8262	-9.9658	-9.9658	-9.9658	-1.0262	-3.0469	-4.2934	4.8233	-2.9324	4.1136	6.6263	5.9179	-1.2142	-3.458	2.826	3.4958	-0.3752	-1.4699	-5.5735	1.3846	-4.2934	-5.0116	-9.9658	5.1696	-2.9324	-2.9324	3.3787	8.4818	1.1117	-6.5064	0.5271	-9.9658	-9.9658	-9.9658	-3.1714	-0.9971	-9.9658
GBMLGG	TCGA-RY-A83X-01	3.51101	1.7141	-4.6082	-6.5064	-1.5105	4.1539	-4.2934	6.0943	2.5036	-3.816	-2.1779	-2.3884	-9.9658	-9.9658	-9.9658	-0.6873	-3.0469	-3.816	4.3992	-1.9379	5.3502	7.0856	5.8963	-2.6349	-9.9658	4.2929	3.2841	-1.1488	-0.5332	-5.5735	0.7407	-6.5064	-9.9658	-9.9658	5.7007	-3.816	-4.035	2.9319	8.7325	0.537	-9.9658	0.8961	-9.9658	-9.9658	-9.9658	-9.9658	-0.4921	-9.9658
GBMLGG	TCGA-HT-7687-01	3.61472	1.5661	-1.8836	-2.1779	0.03	4.867	-2.3884	5.0457	2.9413	-1.5951	-1.1811	-2.5479	-9.9658	-9.9658	-9.9658	-0.1187	-1.9379	-0.3566	3.2526	-0.9971	5.0251	6.3114	5.7853	-0.7108	0.9493	4.9865	5.4169	2.3677	0.1776	-3.0469	1.7009	-2.9324	-3.1714	-2.8262	5.4912	-0.3022	-0.0425	3.5827	8.9952	1.9822	-3.816	0.7579	-9.9658	-9.9658	-5.0116	-2.8262	2.3704	-9.9658
GBMLGG	TCGA-WY-A85A-01	2.8319	1.9786	-2.5479	-3.816	-0.6416	5.1827	-5.0116	7.893	3.091	-9.9658	-0.7346	-5.0116	-9.9658	-9.9658	-5.5735	0.346	-5.5735	-3.3076	4.9603	-2.7274	4.8202	7.4335	5.6537	-1.6394	-1.9942	3.4264	3.5766	0.1388	-0.9686	-4.035	1.6785	-5.5735	-9.9658	-4.2934	6.2608	0.8568	-3.6259	3.4143	8.7338	1.1897	-6.5064	0.3796	-9.9658	-9.9658	-5.0116	0.0158	4.4919	-9.9658
GBMLGG	TCGA-12-3650-01	4.75537	0.9493	-2.0529	-5.0116	-0.7588	6.2523	-1.3183	5.6471	4.4216	-1.2142	-0.5756	-4.6082	-9.9658	-9.9658	-9.9658	-1.3548	-0.394	-0.8863	5.3417	-1.9379	6.8618	7.5893	5.5614	-2.3884	-1.3183	3.4007	3.7794	2.0638	-0.4131	-1.7809	2.791	0.2522	-1.1172	-1.6394	4.5808	1.8282	0.5763	4.5723	9.2231	2.167	-3.6259	1.6695	-9.9658	-9.9658	-9.9658	-3.3076	-0.3752	-9.9658
GBMLGG	TCGA-DB-5281-01	3.00721	1.5902	-1.9942	-2.6349	0.1648	5.2396	-3.6259	7.903	3.2034	-2.3884	-1.1488	-3.0469	-9.9658	-9.9658	-4.6082	-1.0862	-2.2447	-2.9324	5.0099	-1.8836	4.6944	6.9149	5.8914	-0.3752	-0.8339	2.828	3.9108	1.3735	-1.5951	-2.2447	1.6604	-4.2934	-3.458	-5.0116	6.488	-1.5522	-0.1665	3.7518	8.7565	2.2663	-5.5735	1.2875	-5.0116	-9.9658	-9.9658	-2.2447	2.4623	-9.9658
GBMLGG	TCGA-E1-A7YK-01	2.44093	1.2992	-4.2934	-4.2934	-0.4325	4.9869	-1.685	5.193	4.856	-1.5522	0.5666	-2.9324	-2.5479	-9.9658	-9.9658	0.6699	-1.2481	-1.5522	5.5675	-2.114	4.2862	7.7305	6.9819	-3.6259	1.4911	4.7903	4.4621	3.3464	0.6699	-2.9324	2.1114	-5.0116	-2.3884	-1.5522	4.2134	1.1316	-1.5105	3.154	8.3359	4.1986	-3.0469	3.616	-9.9658	-5.5735	-9.9658	-0.6416	1.1382	-9.9658
GBMLGG	TCGA-DU-A5TU-01	2.25704	1.9822	-3.816	-1.5105	-0.6193	5.7845	-2.9324	5.4343	4.4803	-2.5479	0.0718	-1.1172	-9.9658	-5.5735	-9.9658	1.6558	-2.114	-1.8836	5.3274	-2.9324	3.1179	7.4413	6.8311	-0.0574	-1.2828	4.0295	4.2243	0.605	-1.0862	-4.2934	2.8178	-5.0116	-1.3183	-3.1714	5.014	0.3573	-1.4305	3.7094	8.9223	3.5411	-4.6082	1.9527	-9.9658	-9.9658	-9.9658	-0.2845	3.0654	-9.9658
GBMLGG	TCGA-DU-A7TA-01	2.81147	2.362	-2.6349	-2.3147	-1.3921	5.4539	-0.8339	5.4246	3.793	0.099	1.5216	0.0718	-3.0469	-9.9658	-4.035	1.4494	-2.3147	-1.2481	5.6203	-2.1779	5.3495	7.3976	6.1552	-0.3383	0.0014	3.6894	4.1277	1.787	-1.685	-3.1714	2.0844	-9.9658	-3.816	-3.458	5.565	1.9822	-1.0559	3.9289	8.7113	1.9302	-5.5735	1.6964	-9.9658	-9.9658	-5.0116	-1.685	5.7236	-9.9658
GBMLGG	TCGA-CS-5395-01	3.90879	2.5972	-2.3147	-4.2934	-0.4325	6.2369	-4.6082	9.3724	3.7877	-9.9658	0.1388	-2.8262	-9.9658	-9.9658	-5.5735	-2.3884	-3.3076	-3.6259	4.1351	-2.3884	5.3495	6.4557	5.2567	-3.1714	-0.8339	3.4237	4.2987	0.5859	-0.5756	-4.2934	1.5115	-4.2934	-4.6082	-2.8262	5.7937	-2.3147	-2.9324	4.1203	9.4748	2.128	-6.5064	0.6425	-9.9658	-9.9658	-5.0116	-0.7108	1.0151	-9.9658
GBMLGG	TCGA-TQ-A7RR-01	2.49311	1.692	-2.114	-1.7809	-0.0277	4.9519	-3.6259	7.8728	4.0144	-9.9658	-2.5479	-2.1779	-9.9658	-9.9658	-9.9658	-1.3183	-4.035	-4.6082	5.4098	-2.9324	3.6916	6.9297	6.5398	-0.8599	-3.0469	4.8125	5.2122	-0.9971	-0.3201	-4.2934	2.0707	-4.2934	-9.9658	-5.5735	5.9112	-1.685	-4.6082	3.8847	8.6778	3.0376	-9.9658	3.4384	-9.9658	-5.0116	-9.9658	-0.7108	3.1556	-9.9658
GBMLGG	TCGA-HT-A5R5-01	2.8156	1.5316	-4.2934	-1.8314	1.9073	5.6147	-3.1714	7.144	5.0471	-0.8599	-0.8599	-4.035	-9.9658	-5.5735	-9.9658	0.5763	1.2455	-4.2934	6.2126	-1.5951	5.3248	7.7731	7.1386	-3.1714	-2.3147	4.2235	5.1186	1.1512	-1.9379	-3.816	2.4252	-9.9658	-0.7834	-0.8599	6.5532	2.3308	-1.6394	4.0251	8.501	5.323	-6.5064	2.5536	-9.9658	-9.9658	-9.9658	1.4228	5.5865	-9.9658
GBMLGG	TCGA-12-0616-01	4.01343	1.3567	-3.0469	-3.458	-1.3183	6.3091	-0.8084	4.677	4.1111	0.679	0.1388	-3.6259	-9.9658	-9.9658	-9.9658	0.7664	0.058	-0.2498	5.0189	-2.4659	5.3886	6.5075	5.4884	-1.9942	2.0395	3.8551	4.4641	3.6219	0.9789	-1.3548	1.5902	-3.816	2.2391	-2.1779	4.1515	3.992	2.4008	3.0585	8.9749	2.6043	-1.9942	0.5763	-9.9658	-9.9658	-4.6082	-3.3076	0.9115	-9.9658
GBMLGG	TCGA-QH-A65V-01	2.53354	0.5955	-4.035	-9.9658	-1.5105	4.4162	-5.0116	6.4123	3.3192	-3.6259	-3.1714	-5.5735	-9.9658	-9.9658	-5.5735	-2.9324	-9.9658	-3.3076	4.4476	-0.6193	3.6148	7.3216	5.6885	-3.1714	-2.6349	2.1638	2.8641	-1.1172	-2.5479	-6.5064	0.8408	-9.9658	-9.9658	-5.0116	4.8734	-0.1345	-3.3076	3.1079	8.6463	1.7954	-6.5064	3.0163	-9.9658	-9.9658	-9.9658	-2.3884	0.9343	-9.9658
GBMLGG	TCGA-S9-A6WP-01	3.70711	1.816	-9.9658	-4.2934	-0.1828	5.1748	-4.6082	5.3523	3.7825	-2.6349	-3.458	-3.3076	-9.9658	-5.5735	-3.0469	0.2762	-2.0529	0.4016	4.3986	-1.6394	4.5442	7.3101	5.9674	-1.7322	0.2522	4.001	2.9581	1.5612	-0.2671	-1.4305	2.1378	-5.0116	-3.458	-3.0469	5.741	-0.6416	-1.1488	3.6827	8.7016	2.4571	-6.5064	2.233	-9.9658	-9.9658	-4.6082	-5.0116	-0.7108	-9.9658
GBMLGG	TCGA-28-5215-01	4.68091	1.3454	-2.5479	-3.1714	0.5763	6.8338	-0.8599	3.7539	4.9189	0.2762	1.7316	-2.9324	-9.9658	-9.9658	-9.9658	0.2154	-0.2159	0.7999	5.4453	-0.8863	6.8373	7.0427	6.2828	-1.3548	2.0604	4.2951	5.4104	3.1162	1.0433	-0.3383	2.9839	-3.6259	2.1606	-1.3548	5.4006	3.2944	1.0779	4.4203	8.3956	4.6742	-3.458	2.7742	-9.9658	-9.9658	-4.035	-0.3201	4.5988	-9.9658
GBMLGG	TCGA-19-2620-01	3.0635	0.4233	-1.5951	-4.2934	1.6045	6.251	-2.9324	6.5684	3.7614	-4.035	-0.6873	-3.1714	-9.9658	-9.9658	-3.816	0.099	-4.035	-2.3147	5.1334	-4.2934	7.8742	6.7126	5.9334	-5.5735	-2.3147	3.5212	3.8857	1.6281	-1.8314	-3.458	1.5316	-9.9658	1.6045	-2.3884	6.1928	1.0711	-3.0469	3.2174	8.6409	4.01	-5.5735	2.5036	-9.9658	-9.9658	-9.9658	-0.5543	1.334	-9.9658
GBMLGG	TCGA-S9-A6U5-01	2.93166	1.3791	-4.6082	-4.035	-0.1665	4.8827	-2.6349	7.2608	3.1829	-1.0862	-2.0529	-2.6349	-9.9658	-5.5735	-4.6082	0.1776	-1.7809	2.4198	4.5136	0.537	4.0019	7.6121	6	-2.8262	2.1444	3.9421	4.9021	3.4945	0.6332	-2.114	2.081	-2.1779	-2.7274	-3.458	6.2836	2.2663	-0.7588	3.1442	8.6616	3.2662	-3.458	1.1512	-3.6259	-9.9658	-4.2934	-2.4659	0.6145	-4.035
GBMLGG	TCGA-E1-A7YO-01	3.49058	1.9034	-2.3147	-2.7274	-0.2498	4.5856	-0.9971	6.0788	1.8119	-9.9658	-1.7809	-2.4659	-9.9658	-9.9658	-9.9658	-0.1828	-9.9658	-4.2934	3.8085	-3.3076	4.5687	6.6978	5.5522	-1.5951	-2.3147	4.7619	4.8365	-0.0877	-0.8863	-3.816	1.3109	-5.5735	-4.6082	-9.9658	5.6468	-4.035	-3.816	3.5851	8.3421	1.6649	-4.2934	-0.1665	-3.3076	-9.9658	-5.0116	-1.5105	1.5758	-9.9658
GBMLGG	TCGA-QH-A6X8-01	3.76131	1.9452	-4.2934	-4.6082	-0.6193	4.9213	-3.816	3.6894	3.6623	-9.9658	-0.9971	-4.035	-9.9658	-5.0116	-9.9658	0.099	-3.0469	-2.8262	4.6588	-3.1714	4.701	7.4634	5.3071	-2.3147	-1.0862	4.1571	4.3263	-0.394	-1.8836	-4.6082	1.3623	-5.5735	-3.0469	-2.8262	5.4832	-2.2447	-5.5735	3.186	8.548	2.5263	-9.9658	2.3843	-9.9658	-5.0116	-9.9658	-1.2142	0.7664	-9.9658
GBMLGG	TCGA-HT-7610-01	3.14241	1.1641	-1.0862	-2.6349	-0.1187	4.8233	-2.4659	7.3104	2.8562	-9.9658	-2.4659	-3.3076	-9.9658	-9.9658	-5.0116	-2.114	-4.6082	-3.6259	3.335	-3.1714	3.7061	6.3496	5.7361	-3.0469	-2.1779	3.7783	3.7888	-0.6416	-1.8836	-3.0469	0.6145	-6.5064	-2.9324	-3.816	6.327	-3.0469	-5.5735	3.6849	8.5264	0.9191	-5.5735	1.2636	-9.9658	-9.9658	-5.5735	1.2271	5.4922	-9.9658
GBMLGG	TCGA-HT-7875-01	3.35475	1.3679	-2.9324	-4.6082	-1.0262	5.0282	-3.816	6.8929	1.7702	-9.9658	-5.0116	-2.8262	-9.9658	-9.9658	-5.5735	-1.9379	-9.9658	-4.2934	3.8798	1.0079	4.6531	6.7136	5.1764	-2.3884	-4.035	4.0189	4.1178	-2.1779	-1.1811	-6.5064	0.6239	-9.9658	-5.0116	-9.9658	7.1307	-0.0277	-2.114	3.6532	9.0696	0.2154	-9.9658	-0.1187	-9.9658	-9.9658	-9.9658	-4.2934	-0.1665	-9.9658
GBMLGG	TCGA-16-0846-01	3.74306	1.3901	-9.9658	-3.1714	1.7489	5.8963	-0.8084	7.2027	5.1563	1.2756	0.0854	-1.7322	-2.9324	-4.2934	-9.9658	3.5009	-0.5125	1.4174	5.2939	-0.1993	4.0773	6.7565	6.579	-0.1665	2.8199	5.0964	6.2225	4.3133	0.4657	-2.0529	2.7095	-1.9379	-3.6259	-0.5543	6.0966	6.562	1.692	3.506	8.1072	3.8085	-1.8836	4.3688	-9.9658	-9.9658	-2.6349	-0.3566	4.3399	-9.9658
GBMLGG	TCGA-R8-A6MK-01	2.88753	0.4447	-2.6349	-2.9324	-0.1345	4.5589	-9.9658	7.282	3.0376	-9.9658	-3.1714	-5.0116	-9.9658	-9.9658	-9.9658	-2.9324	-5.5735	-3.458	4.2412	-0.4719	4.9951	7.5969	4.8172	-3.458	-9.9658	4.3024	4.722	-2.1779	-1.3183	-5.0116	0.6699	-9.9658	-3.3076	-4.6082	5.4283	-1.9379	-4.035	3.6054	9.0631	0.6239	-6.5064	1.5758	-9.9658	-5.5735	-9.9658	-4.2934	-1.0862	-9.9658
GBMLGG	TCGA-P5-A5F0-01	3.12762	1.8444	-9.9658	-4.6082	-0.8084	4.8207	-2.3147	5.8053	1.3283	-9.9658	-3.458	-2.4659	-9.9658	-5.5735	-9.9658	-1.2828	-4.6082	-5.0116	3.7804	-2.7274	5.1668	7.0992	4.6977	-2.9324	-2.114	4.225	3.1245	0.5069	-0.5332	-4.6082	0.4967	-9.9658	-4.2934	-4.035	5.8719	-1.4699	-3.1714	2.9167	8.5593	0.9115	-9.9658	1.6327	-9.9658	-5.0116	-3.458	-3.1714	-1.2481	-9.9658
GBMLGG	TCGA-R8-A73M-01	3.05655	2.0289	-3.0469	-5.0116	-2.1779	5.3744	-5.0116	5.2739	1.4756	-4.035	-4.6082	-1.7809	-9.9658	-9.9658	-9.9658	-0.2498	-4.6082	-3.816	4.2987	-2.8262	3.9654	8.149	4.3285	-1.9942	-9.9658	2.9729	4.6165	-0.8863	-0.6643	-5.5735	0.2154	-9.9658	-3.0469	-9.9658	5.5714	-3.458	-4.035	2.667	8.6979	0.099	-9.9658	0.2154	-9.9658	-9.9658	-9.9658	-3.458	1.9712	-9.9658
GBMLGG	TCGA-02-0047-01	3.71921	1.0222	-5.0116	-1.6394	-0.1345	6.9167	-1.0262	7.7158	4.3328	-2.0529	0.5069	-4.035	-9.9658	-9.9658	-5.0116	0.2154	-1.685	0.2998	5.6619	-0.2498	8.0592	7.1312	6.6981	-2.1779	-0.9406	4.6742	5.1297	1.7828	-1.8314	0.0014	3.7464	-9.9658	-1.5522	-2.114	6.3	3.1701	0.2522	4.6159	8.6293	4.0867	-9.9658	2.0742	-9.9658	-9.9658	-9.9658	-0.1345	3.3379	-3.3076
GBMLGG	TCGA-S9-A6TS-01	2.28392	2.0569	-2.6349	-3.3076	-0.5332	4.9093	-2.3147	6.4	4.0575	-1.685	-1.0862	-3.3076	-9.9658	-9.9658	-5.5735	-0.3383	-3.0469	-3.6259	5.4223	-3.816	4.4542	7.8611	6.1522	-1.6394	-2.2447	3.7345	2.7183	0.2762	-1.4305	-2.3884	2.296	-9.9658	-3.816	-4.2934	5.7145	-1.9379	-2.4659	3.6804	8.3903	2.233	-9.9658	0.9268	-4.6082	-9.9658	-9.9658	-2.2447	-0.0277	-9.9658
GBMLGG	TCGA-S9-A6TW-01	2.58494	1.7185	-3.6259	-4.2934	-2.1779	4.4509	-2.3147	5.0264	1.0151	-2.5479	-2.1779	-9.9658	-9.9658	-9.9658	-5.0116	-0.7588	-6.5064	-2.7274	3.0808	-2.9324	4.836	7.8536	5.3045	-3.816	-0.4325	2.4035	2.5876	1.2209	-0.0277	-2.3884	1.5115	-3.816	-2.6349	-4.2934	5.8197	-1.1488	-1.8836	3.0252	8.0173	1.8762	-6.5064	0.3346	-9.9658	-9.9658	-4.6082	-4.6082	-0.9686	-9.9658
GBMLGG	TCGA-E1-5303-01	2.93357	1.3397	-4.6082	-5.0116	-0.8339	4.8334	-2.8262	6.5195	5.3744	-2.5479	-0.3566	-9.9658	-9.9658	-9.9658	-9.9658	-1.8836	-2.6349	-3.3076	5.9876	-3.816	3.2752	6.8509	7.7648	-1.7809	-3.1714	2.6302	3.5411	-0.013	-1.4305	-4.2934	2.5948	-5.5735	-4.6082	-3.458	4.481	-2.7274	-3.458	4.551	8.6153	2.4225	-6.5064	1.2023	-9.9658	-9.9658	-9.9658	0.1776	3.8481	-9.9658
GBMLGG	TCGA-HT-7606-01	4.30455	1.4494	-4.035	-3.816	-1.3921	6.8184	-3.816	6.0913	3.3235	-4.2934	-2.8262	-3.816	-9.9658	-9.9658	-5.5735	0.2881	-5.0116	-3.816	3.9175	-4.6082	6.4975	7.4113	5.444	0.5568	-3.1714	5.0054	4.2095	-0.2671	-2.3884	-6.5064	1.7446	-9.9658	-9.9658	-3.1714	4.9933	-1.8314	-2.9324	3.9261	9.7747	0.5859	-9.9658	0.4233	-9.9658	-9.9658	-9.9658	-1.7809	0.8961	-5.0116
GBMLGG	TCGA-DU-6408-01	3.35051	0.688	-2.4659	-2.9324	0.6699	5.3259	-2.4659	8.2547	4.1078	-3.3076	-2.3147	-2.5479	-9.9658	-9.9658	-5.5735	-0.6193	-3.458	-6.5064	4.8851	-2.5479	3.7603	7.2021	6.7233	-0.9132	-3.1714	4.7049	5.6183	-0.0725	-0.8599	-4.6082	1.6695	-5.5735	-5.0116	-3.816	6.8255	-0.7834	-2.3884	3.9232	8.7471	2.1894	-5.5735	1.5115	-4.6082	-9.9658	-9.9658	-0.5332	4.0497	-9.9658
GBMLGG	TCGA-FG-5964-01	3.3045	1.5563	-9.9658	-6.5064	-0.1031	5.1429	-1.4305	5.1408	4.1136	-9.9658	-1.685	-1.7809	-9.9658	-9.9658	-9.9658	3.3647	-1.3921	1.2271	4.863	-2.4659	4.2017	6.6567	5.7934	-3.1714	-0.2671	2.8462	3.8571	2.3308	-0.3566	-3.6259	1.2085	-6.5064	-9.9658	-2.7274	5.5805	-0.8084	-2.5479	3.4543	8.007	3.002	-5.0116	2.876	-9.9658	-9.9658	-9.9658	-1.9942	0.7407	-9.9658
GBMLGG	TCGA-DB-A64Q-01	3.33625	0.8327	-4.2934	-5.0116	-0.8339	4.8929	-4.6082	8.0416	2.9544	-9.9658	-2.114	-2.114	-9.9658	-9.9658	-9.9658	-0.0574	-5.5735	-3.816	4.5336	0.346	4.0454	7.1351	4.9892	-1.6394	-2.8262	3.4984	3.6849	-1.5522	-1.4699	-3.816	0.4125	-9.9658	-9.9658	-3.0469	4.2736	-2.9324	-4.6082	3.4291	8.9374	0.6145	-9.9658	0.6239	-9.9658	-9.9658	-9.9658	-1.0559	1.5612	-9.9658
GBMLGG	TCGA-S9-A7IZ-01	2.99635	1.3679	-1.4305	-2.2447	0.1648	5.0068	-1.3548	8.6746	3.7982	-3.6259	-4.6082	-3.6259	-3.1714	-9.9658	-9.9658	-0.3383	-3.3076	-3.0469	5.0545	-2.6349	3.8177	7.5515	6.4459	-2.5479	-1.4305	3.9654	4.7192	-0.1504	-1.0559	-3.1714	1.1117	-4.2934	-3.816	-2.9324	5.8243	-1.7809	-2.6349	3.7709	8.3129	2.3953	-9.9658	0.517	-3.6259	-9.9658	-9.9658	-5.0116	1.125	-9.9658
GBMLGG	TCGA-S9-A6WH-01	3.23726	2.2452	-2.3147	-3.458	-0.9406	4.497	-9.9658	3.3828	2.2082	-3.458	-3.3076	-2.4659	-9.9658	-9.9658	-9.9658	-0.3566	-1.9379	-5.0116	3.2944	-3.458	4.3484	7.0376	5.3126	0.044	-2.7274	4.5002	3.8167	-1.7322	-0.394	-5.0116	0.9568	-9.9658	-3.3076	-9.9658	4.5429	-2.4659	-9.9658	2.9747	8.5501	1.7954	-9.9658	1.1447	-9.9658	-9.9658	-9.9658	-2.9324	0.4657	-9.9658
GBMLGG	TCGA-HT-7602-01	2.63227	1.4335	-3.458	-4.6082	-0.1993	4.4829	-3.458	7.914	4.0046	-9.9658	-0.4131	-4.6082	-9.9658	-9.9658	-9.9658	-2.0529	-5.5735	-3.816	4.7143	-1.3183	3.4264	7.0713	6.0943	-2.1779	-2.114	2.9071	2.3222	-0.0425	-1.685	-4.6082	2.0979	-5.0116	-9.9658	-4.2934	6.1165	-0.3752	-2.3884	3.417	8.6976	2.6828	-9.9658	2.4649	-9.9658	-9.9658	-5.5735	0.3796	2.791	-9.9658
GBMLGG	TCGA-19-2624-01	4.75759	2.0111	-3.6259	-2.1779	-0.4325	6.6165	-1.1172	6.4756	2.8381	-1.3183	-2.3884	-0.8084	-2.114	-9.9658	-9.9658	1.6875	-2.0529	-2.8262	4.0977	-2.6349	8.6226	7.6913	3.7335	-0.9686	-0.8084	3.3591	3.5754	1.0079	-0.3566	-3.0469	2.0111	-5.5735	-2.3884	-3.6259	5.0972	2.3337	-0.6416	3.2127	9.4625	2.5561	-6.5064	1.3901	-2.0529	-5.0116	-9.9658	-2.3147	1.7141	-9.9658
GBMLGG	TCGA-DU-A6S8-01	3.17154	2.2931	-4.6082	-5.5735	-2.114	4.8187	-2.7274	3.7815	2.0395	-5.5735	-3.6259	-2.3147	-3.0469	-3.816	-3.816	0.2642	-2.3884	-1.8314	2.8178	-3.6259	4.431	7.0455	4.2412	-2.2447	-0.0725	3.5424	3.3379	0.2762	-0.3022	-3.6259	1.3791	-5.5735	-4.6082	-9.9658	5.2865	-2.114	-3.1714	3.0757	8.8506	1.2209	-9.9658	0.7748	-9.9658	-9.9658	-9.9658	-1.9942	0.434	-9.9658
GBMLGG	TCGA-HT-7858-01	2.81764	1.2394	-2.0529	-0.8084	-0.013	5.151	-2.3147	7.5446	4.2465	-2.7274	0.688	-2.5479	-9.9658	-9.9658	-5.0116	0.099	-3.3076	1.1316	4.6047	-2.0529	5.0005	6.8395	5.7093	-1.1811	1.1641	3.8177	4.3313	3.0774	-0.1993	-1.1488	2.7487	-2.3884	-9.9658	-2.0529	5.9341	2.1147	0.7999	4.1002	8.8055	2.982	-2.6349	1.7532	-9.9658	-9.9658	-5.5735	0.3231	5.0144	-9.9658
GBMLGG	TCGA-32-1982-01	3.18907	1.7575	-1.0559	-2.6349	1.6604	6.0315	-0.6416	5.4595	4.9649	0.8327	1.816	-2.1779	1.3225	-1.9942	-3.6259	0.3115	-1.2481	0.1776	5.9528	-1.1811	8.7022	7.0729	6.7516	-2.2447	3.1669	4.6271	5.2285	4.1547	1.0293	-1.5951	4.0679	-0.6416	-1.0559	-2.7274	4.773	3.9213	2.0707	5.0113	8.5213	2.8916	-2.4659	2.0004	-9.9658	-9.9658	-2.5479	0.346	4.809	-9.9658
GBMLGG	TCGA-S9-A6WD-01	3.25095	0.9038	-3.458	-5.5735	0.0718	3.7083	-5.0116	6.0575	2.3732	-3.6259	-5.0116	-1.8836	-9.9658	-9.9658	-5.0116	-1.1172	-3.1714	-3.458	3.5633	-1.2828	3.6827	7.0862	5.1416	-1.5522	-1.8836	3.4291	3.9431	-0.0725	0.058	-3.458	1.2992	-4.2934	2.081	-9.9658	4.9388	-0.3566	-3.1714	3.1604	8.4179	2.2633	-6.5064	1.1117	-9.9658	-9.9658	-9.9658	-4.6082	-1.0862	-9.9658
GBMLGG	TCGA-27-1835-01	3.74094	1.8444	-0.9406	-1.0559	3.4971	5.7895	-3.6259	7.7682	1.2696	-2.5479	-5.0116	-0.8599	-0.0574	-4.2934	-5.0116	-1.3921	-4.6082	-2.1779	5.3837	-3.458	7.429	7.8648	3.5161	-1.7322	0.2522	3.3206	4.3249	2.3649	-1.1811	-3.816	2.6371	-3.0469	-4.2934	-3.816	4.4203	5.0777	0.5859	3.7138	8.6432	1.9859	-4.2934	0.5568	-2.8262	-9.9658	-4.6082	-4.035	-0.7588	-9.9658
GBMLGG	TCGA-HT-7860-01	3.79905	1.2455	-0.1187	-3.458	3.0688	5.5699	-1.1172	9.5961	4.1563	0.9038	-0.4325	-4.2934	-9.9658	-5.0116	-4.035	-0.4719	-2.3147	-0.4325	5.2803	-1.1811	6.2375	6.9274	6.2081	-3.458	1.0151	5.2646	6.0805	2.3732	-0.5543	-2.0529	2.5462	-1.5522	-1.2828	-3.3076	5.2177	6.5711	2.2051	5.14	9.0638	3.8827	-2.3884	1.4388	-9.9658	-9.9658	-9.9658	0.517	5.1453	-9.9658
GBMLGG	TCGA-DU-7006-01	3.77502	0.9862	-5.5735	-3.6259	3.7138	7.326	-1.5522	6.7629	5.0041	-2.8262	0.4447	-3.458	-2.2447	-4.2934	-5.5735	-0.6416	-0.7346	-0.0725	5.8802	-1.3183	6.6212	6.7959	6.2089	-0.7834	2.1509	4.9246	5.5946	3.449	0.2029	-1.3183	2.6418	-2.5479	-1.3921	-2.4659	5.7795	1.5115	0.5763	4.4926	8.7281	3.3577	-2.5479	3.0927	-1.685	-5.5735	-4.6082	-0.4921	2.7487	-9.9658
GBMLGG	TCGA-TQ-A7RS-01	2.89332	2.0218	-3.3076	-3.816	-1.3548	4.6804	-4.035	5.6938	1.9786	-9.9658	-3.0469	-1.7322	-9.9658	-9.9658	-9.9658	-0.4521	-3.1714	-4.2934	4.026	-2.7274	4.5778	7.4548	5.7132	-3.6259	-3.816	3.3993	2.8402	-1.3548	-0.2671	-6.5064	1.2756	-9.9658	-9.9658	-9.9658	6.0036	-3.1714	-4.2934	3.3017	8.8406	1.2875	-9.9658	1.3051	-9.9658	-9.9658	-9.9658	-9.9658	-2.4659	-9.9658
GBMLGG	TCGA-DU-7009-01	3.21725	1.196	-3.0469	-5.5735	-0.7588	4.6708	-4.6082	6.437	1.8404	-9.9658	-2.3147	-2.9324	-9.9658	-9.9658	-9.9658	-2.5479	-5.0116	-4.035	3.1637	-2.5479	4.2936	6.6459	4.936	-0.9406	-3.1714	3.8983	1.5563	-0.3201	-1.2481	-3.458	0.4125	-5.5735	-9.9658	-5.0116	5.6879	-0.5973	-4.035	3.0217	9.0505	1.2576	-9.9658	1.1577	-4.6082	-9.9658	-9.9658	-1.3183	3.5399	-9.9658
GBMLGG	TCGA-06-0747-01	3.29425	2.2543	-3.1714	-3.3076	0.4125	7.5495	-1.5951	6.5351	3.1939	2.0878	-0.6873	-1.4699	-9.9658	-9.9658	-9.9658	0.0158	-1.7322	-3.1714	5.0981	-5.0116	6.9943	6.9653	4.6159	-6.5064	-2.3147	3.8876	4.5491	0.4125	-0.6193	-4.2934	1.3846	-9.9658	-2.6349	-4.2934	4.9946	2.081	0.3231	3.1844	9.2708	3.0533	-5.5735	0.2154	-2.0529	-9.9658	-9.9658	-1.1811	3.9737	-9.9658
GBMLGG	TCGA-DU-7010-01	3.76974	1.7786	-3.3076	-4.2934	-0.7834	5.7669	-2.5479	5.9239	3.4477	-3.6259	-1.9379	-2.4659	-9.9658	-5.5735	-9.9658	-0.4131	-2.6349	-3.1714	3.9337	-2.7274	4.6554	6.2608	6.2091	-0.2498	-0.9971	4.7693	4.4829	0.7233	-1.5105	-2.9324	2.0254	-6.5064	-5.0116	-3.6259	5.3824	1.4174	1.5854	3.3717	8.9878	3.1393	-5.5735	2.0004	-9.9658	-5.5735	-9.9658	-0.9406	1.105	-9.9658
GBMLGG	TCGA-QH-A6X3-01	2.88753	0.4016	-4.035	-2.2447	-0.4131	4.9265	-2.4659	8.5899	1.8404	-9.9658	-0.3566	-3.3076	-9.9658	-9.9658	-9.9658	2.0673	-2.7274	0.2154	3.9654	-1.8314	5.0202	6.74	5.0335	-0.5756	-1.0862	3.2796	3.863	-0.1031	-1.8836	-4.6082	0.058	-9.9658	-4.6082	-0.9406	6.0792	-0.8084	-4.2934	3.5399	9.2245	2.2237	-9.9658	0.1903	-9.9658	-9.9658	-9.9658	-2.4659	4.6708	-9.9658
GBMLGG	TCGA-DU-8164-01	3.41951	1.1833	-3.816	-5.5735	-0.5973	5.2865	-2.2447	6.9919	1.7954	-9.9658	-6.5064	-2.2447	-9.9658	-5.5735	-5.5735	-0.394	-9.9658	-4.2934	4.0705	-2.8262	4.6787	6.8816	4.6719	-1.2828	-3.458	4.9878	3.4843	-2.3147	-0.6643	-3.458	-0.013	-9.9658	-5.0116	-5.5735	5.764	-1.8314	-1.7809	3.3897	9.0928	1.1184	-6.5064	0.058	-9.9658	-9.9658	-9.9658	-1.2142	2.8858	-9.9658
GBMLGG	TCGA-DU-7018-01	3.66339	1.4704	-4.2934	-6.5064	-1.685	4.4033	-9.9658	4.8064	0.5271	-6.5064	-3.6259	-4.035	-9.9658	-9.9658	-5.5735	-1.9379	-3.816	-4.6082	2.167	-1.685	4.6713	6.8422	4.4958	-3.1714	-2.7274	3.6474	2.93	-0.9406	-0.4131	-2.0529	1.2455	-9.9658	-5.5735	-6.5064	5.3104	-1.8314	-3.3076	2.9618	8.5551	1.674	-6.5064	-0.8599	-9.9658	-9.9658	-9.9658	-5.5735	1.2696	-9.9658
GBMLGG	TCGA-RY-A843-01	3.20323	0.9862	-3.1714	-3.6259	-1.1811	4.3583	-2.8262	7.2851	3.0163	-5.0116	-3.816	-2.9324	-9.9658	-6.5064	-9.9658	-0.6873	-5.5735	-9.9658	4.7971	-2.5479	4.4855	7.5807	5.9901	-4.035	-3.0469	3.0706	2.7292	-0.7588	-0.7834	-5.5735	0.7407	-9.9658	-9.9658	-4.6082	5.6949	-4.6082	-2.9324	3.1377	8.6701	0.8961	-5.5735	0.517	-2.7274	-9.9658	-9.9658	-3.6259	0.7493	-9.9658
GBMLGG	TCGA-DU-7014-01	1.97453	0.9419	-4.035	-4.035	-0.9686	4.853	-4.6082	4.7236	2.791	-9.9658	-0.394	-4.6082	-9.9658	-9.9658	-5.5735	-1.1811	-4.6082	-4.2934	4.2088	-4.6082	2.8341	6.5952	5.9241	-2.2447	-1.7322	1.9111	1.7009	0.5568	-1.4699	-4.035	1.884	-6.5064	-9.9658	-5.0116	4.8992	-1.6394	-3.3076	3.3192	8.5953	1.5415	-9.9658	1.1117	-9.9658	-9.9658	-9.9658	-3.3076	0.1648	-9.9658
GBMLGG	TCGA-HT-7693-01	2.6848	1.4547	-1.0862	-1.3921	0.4761	4.8929	-3.816	6.1185	4.1595	-3.6259	-0.4131	-2.2447	-9.9658	-9.9658	-9.9658	-0.2328	-2.3147	-0.6416	4.4848	-3.3076	8.7312	7.7279	6.428	0.3573	0.1776	3.6771	4.0782	2.1313	-0.9686	-4.2934	2.4412	-3.6259	-4.6082	-2.1779	5.2028	-0.6416	-2.8262	3.8075	9.067	2.8779	-5.0116	1.1577	-9.9658	-9.9658	-9.9658	0.537	3.728	-9.9658
GBMLGG	TCGA-FG-A6J3-01	3.37569	1.2147	-9.9658	-4.035	-0.5125	7.129	-1.5105	3.5584	4.423	-0.3383	-1.5522	-9.9658	-9.9658	-3.816	-9.9658	1.4441	-0.4921	-0.8084	5.6874	-2.3884	2.8542	7.8779	5.0023	-1.4305	2.4492	2.7095	4.6606	4.2266	0.688	-3.3076	2.6441	-3.458	-2.9324	-1.1172	5.2044	3.3759	1.7912	3.1028	7.9651	4.2033	-9.9658	3.5009	-9.9658	-9.9658	-9.9658	-1.4699	3.2112	-1.8314
GBMLGG	TCGA-28-5220-01	3.37569	0.2642	-9.9658	-1.9942	0.1648	5.6499	-2.3147	7.5711	4.9383	0.3573	-0.1828	-9.9658	-0.7834	-5.0116	-9.9658	-1.6394	-3.0469	-0.1345	4.3242	-1.7322	2.7615	7.8766	5.7845	-3.6259	1.8762	3.9874	4.7415	2.1476	-0.0277	-5.0116	2.0254	-3.1714	-4.2934	-2.2447	4.7613	5.037	1.4911	4.4067	9.0992	1.105	-6.5064	-0.0877	-9.9658	-5.0116	-9.9658	-0.3022	1.674	-9.9658
GBMLGG	TCGA-HT-8106-01	2.75487	2.6114	-1.2828	2.128	1.1577	5.774	2.4831	5.2196	6.1056	3.2158	1.6604	-4.035	-9.9658	-5.5735	-5.0116	1.4011	2.3898	2.7444	5.9507	2.7227	4.1409	7.2401	7.7691	-3.0469	4.7415	6.2517	6.8162	6.5875	4.9364	2.0004	3.716	1.5115	-0.1993	-0.394	5.4179	4.281	5.4223	4.6882	8.4855	4.4842	1.9675	3.345	-9.9658	-9.9658	-1.3183	-1.5105	3.1062	-3.1714
GBMLGG	TCGA-HT-7472-01	3.22805	0.9038	-4.2934	-0.1828	0.688	5.5601	-0.6193	8.3155	4.4223	-2.114	-0.2671	-3.0469	-9.9658	-9.9658	-5.5735	-0.8599	-2.0529	-1.6394	5.1514	-1.5105	3.6289	6.7481	6.5451	-1.1488	0.3907	4.5305	5.6582	1.7273	-0.9132	-2.8262	2.043	-2.7274	-3.816	-4.6082	5.9586	0.1519	-0.5973	4.4476	9.0562	2.9356	-4.6082	1.8918	-9.9658	-5.0116	-5.5735	-3.1714	1.125	-9.9658
GBMLGG	TCGA-14-0817-01	3.32194	1.3956	0.099	-4.6082	0.346	5.8187	-2.0529	4.3256	5.4433	1.4011	2.3953	-3.816	-0.0877	-5.0116	-3.6259	-0.5543	-1.5951	0.2029	5.565	-2.5479	5.8035	6.621	5.9352	-3.1714	2.2175	4.2706	4.554	3.3278	0.058	-1.2481	3.66	-2.3147	-0.8599	-0.4921	3.7919	6.2211	0.9642	4.6112	8.2608	4.2721	-3.3076	0.9568	-9.9658	-9.9658	-9.9658	1.5854	5.2619	-3.1714
GBMLGG	TCGA-HT-7855-01	2.06001	1.6695	-3.458	-2.8262	-1.685	4.861	-1.9379	6.701	2.8877	-9.9658	-1.0862	-2.8262	-9.9658	-9.9658	-9.9658	-1.2828	-9.9658	-4.2934	4.8043	-3.0469	4.7629	6.7182	6.093	-1.5951	-5.0116	3.6451	2.8321	-2.4659	-1.3183	-4.035	1.7532	-9.9658	-9.9658	-4.6082	5.7236	-2.8262	-5.0116	3.4398	8.8076	1.3109	-9.9658	0.4552	-9.9658	-9.9658	-9.9658	-3.3076	0.1776	-9.9658
GBMLGG	TCGA-06-2570-01	3.8728	2.5413	-2.0529	-3.816	0.1648	6.2093	-2.6349	6.8864	5.1061	-2.5479	0.4016	-1.5951	-9.9658	-4.6082	-3.816	0.1519	-4.035	0.2881	5.7005	-3.6259	8.5939	6.8789	6.4212	-0.5756	0.044	4.8515	4.8304	1.2576	-1.2828	-1.1172	3.345	-9.9658	-2.5479	-1.5105	4.8064	3.5073	0.5271	4.7709	8.7686	4.0278	-6.5064	2.4035	-9.9658	-9.9658	-9.9658	0.2642	4.1053	-9.9658
GBMLGG	TCGA-DB-A4XG-01	3.72679	1.6093	-2.7274	-6.5064	-0.2498	5.1756	-3.6259	5.4874	0.7579	-9.9658	-1.3548	-9.9658	-9.9658	-9.9658	-9.9658	-1.6394	-6.5064	-9.9658	2.9356	-2.8262	4.1269	6.7443	5.3338	-1.1488	-9.9658	4.222	3.2602	-4.2934	-1.7322	-4.2934	0.2998	-9.9658	-1.7322	-5.5735	5.5179	-1.7809	-4.035	3.1971	8.8867	0.7233	-6.5064	-0.1828	-4.6082	-9.9658	-9.9658	-5.0116	-0.3566	-9.9658
GBMLGG	TCGA-HT-A5RC-01	3.75918	1.4065	-5.0116	-2.6349	3.2662	6.4555	-3.1714	7.5301	4.3313	-9.9658	-1.0862	-5.0116	-9.9658	-9.9658	-9.9658	-2.8262	-2.6349	-2.5479	5.0648	-2.4659	5.862	6.7936	5.8785	-1.3548	0.2277	4.1094	5.0009	1.4652	-0.9406	-4.2934	1.595	-4.2934	-2.7274	-3.816	5.3413	-0.6416	-1.5951	3.6748	8.9034	4.0713	-4.6082	2.1702	-9.9658	-9.9658	-3.3076	0.0718	4.0287	-9.9658
GBMLGG	TCGA-VM-A8C8-01	2.60883	1.3956	-9.9658	-3.458	-0.5756	4.9528	-3.816	8.1833	3.9617	-9.9658	-2.3147	-4.035	-9.9658	-9.9658	-9.9658	-0.2328	-4.6082	-5.0116	5.3796	-2.3147	2.9929	8.1276	6.0751	-1.9942	-2.4659	3.0498	3.3814	-0.3566	-0.8863	-3.1714	0.9568	-9.9658	-9.9658	-9.9658	4.3903	-3.3076	-5.0116	3.6054	8.8385	1.9073	-9.9658	0.7321	-9.9658	-9.9658	-5.0116	-5.0116	-1.685	-9.9658
GBMLGG	TCGA-HT-7681-01	2.66676	1.8524	-3.816	-3.6259	-0.5973	4.6183	-1.4699	7.544	2.6533	-1.4305	-2.1779	-4.2934	-9.9658	-9.9658	-9.9658	-1.1488	-2.3147	-1.0862	4.0198	-0.5125	4.2017	7.2192	5.6991	-3.6259	1.7954	3.9118	3.8571	2.8542	0.5763	-3.3076	2.3508	-1.9942	-3.6259	-4.2934	6.2527	1.4962	1.1184	3.2885	8.7	1.9377	-3.816	1.0151	-9.9658	-9.9658	-9.9658	-2.2447	1.8762	-4.6082
GBMLGG	TCGA-41-4097-01	3.90301	1.9527	-1.4305	-1.9379	2.2543	7.5754	-1.1172	4.7253	4.6247	-0.5543	0.7832	-2.114	-9.9658	-9.9658	-9.9658	-0.1828	-0.3201	-0.7108	5.8545	-0.7588	7.9858	7.2418	6.4436	-3.458	2.651	4.1044	4.8455	3.6961	1.6374	-0.6643	4.6154	-1.4699	4.4203	-1.5522	5.0734	2.4225	0.6608	4.1867	7.397	5.2555	-1.5522	1.7489	-9.9658	-9.9658	-2.8262	0.9268	3.6312	-9.9658
GBMLGG	TCGA-DU-A6S2-01	2.70485	0.6517	-2.114	-6.5064	-0.1993	4.6462	-5.5735	5.4822	2.1378	-9.9658	-5.5735	-4.035	-9.9658	-4.035	-3.3076	-0.0574	0.4761	-4.2934	3.7699	-2.1779	5.138	6.4209	5.966	-6.5064	-1.8836	3.6451	3.7582	1.3283	-2.114	-6.5064	0.8488	-4.2934	-4.6082	-3.816	5.9773	-1.9942	-4.6082	2.7205	8.4039	4.5336	-6.5064	1.9034	-9.9658	-5.0116	-4.2934	-1.5522	4.0073	-9.9658
GBMLGG	TCGA-DU-7309-01	2.99635	1.5216	-2.5479	-3.3076	-0.2159	4.5874	-3.1714	7.3407	2.96	-9.9658	-1.5951	-3.6259	-9.9658	-9.9658	-9.9658	-1.7322	-2.6349	-2.6349	4.306	-3.6259	3.8788	6.8009	6.0086	-2.1779	-2.3147	3.0654	3.2856	-0.5125	-2.1779	-4.035	1.6512	-6.5064	-9.9658	-5.0116	6.0803	-2.6349	-3.3076	3.4661	8.1627	2.4571	-5.5735	-0.013	-5.0116	-9.9658	-9.9658	0.0854	5.2525	-9.9658
GBMLGG	TCGA-DB-A4XH-01	2.40868	1.2147	-4.6082	-4.035	-1.7322	3.5022	-3.458	6.4943	0.9935	-5.5735	-5.0116	-4.6082	-9.9658	-5.5735	-9.9658	-2.5479	-4.2934	-4.035	2.4225	-2.3147	3.9983	6.4933	5.5069	-1.6394	-4.035	2.5288	1.9149	-1.8314	-2.3884	-5.5735	0.7233	-9.9658	-5.0116	-3.6259	4.4384	-0.8599	-0.7834	2.5137	8.0203	0.4016	-6.5064	1.2455	-9.9658	-5.5735	-9.9658	-3.458	3.2988	-9.9658
GBMLGG	TCGA-HT-7485-01	3.46728	0.6517	-9.9658	-0.1187	1.0363	4.7318	-3.1714	9.8251	4.0348	-3.0469	0.547	-9.9658	-9.9658	-9.9658	-9.9658	-1.7809	-4.6082	-3.1714	4.2472	0.4865	2.9839	7.0511	6.0505	-2.1779	-2.8262	4.8141	5.7496	-0.5756	-2.7274	-4.6082	1.8404	-9.9658	-9.9658	-4.2934	5.7645	-1.1488	-2.0529	4.0436	9.0526	2.6043	-9.9658	1.0642	-9.9658	-9.9658	-9.9658	-0.7346	1.0573	-9.9658
GBMLGG	TCGA-VW-A7QS-01	2.57287	1.2516	-4.2934	-2.8262	0.3115	6.0815	-5.0116	3.1924	1.3051	-3.0469	0.0158	-3.0469	-4.035	-9.9658	-9.9658	0.4967	-4.6082	-1.8836	4.0419	-3.3076	9.7816	7.9458	3.6883	-2.5479	-2.8262	3.6589	2.2082	-1.7809	0.058	-2.3147	0.688	-9.9658	-4.6082	-5.0116	5.2991	-2.2447	-3.3076	3.0163	8.4979	2.2693	-9.9658	0.0158	-9.9658	-9.9658	-9.9658	0.4967	-0.7346	-9.9658
GBMLGG	TCGA-06-0211-01	4.41177	2.39123	-1.61707	-2.87831	0.978918	7.03734	-0.997124	6.56252	4.46245	0.0854281	-0.710737	-4.6082	-1.10159	-3.71784	-5.01158	-1.51043	-2.72737	-0.564889	6.10825	-1.96577	8.26888	7.16751	5.47985	-2.77597	-0.722591	4.32271	4.8985	2.74225	-0.249845	-1.26531	3.17167	-3.81605	0.787412	-1.13289	5.4499	3.18839	0.522076	4.83571	8.69752	4.94323	-2.3147	2.37737	-9.9658	-9.9658	-5.9658	-0.543698	3.364	-9.9658
GBMLGG	TCGA-VV-A86M-01	2.54597	1.177	-9.9658	-3.6259	-0.5756	4.9833	-3.458	5.6106	3.7006	-1.3183	-1.685	-2.4659	-9.9658	-5.5735	-4.6082	-0.4921	-3.3076	-2.3884	4.7329	-3.1714	5.9656	6.8202	6.2644	-0.4325	1.5415	3.7877	3.8915	0.8408	-1.0559	-2.5479	1.8036	-5.5735	-2.9324	-2.5479	3.325	0.4447	-1.8836	3.5779	8.6223	0.8488	-9.9658	0.4552	-9.9658	-9.9658	-9.9658	-2.114	2.2813	-9.9658
GBMLGG	TCGA-E1-A7YV-01	4.67861	1.642	0.0158	-2.8262	-0.3383	4.848	-1.9379	6.479	1.5854	-1.9942	-2.5479	-2.8262	-9.9658	-9.9658	-4.6082	-1.9942	-3.3076	-3.3076	4.5148	-2.2447	5.5583	7.3329	5.5438	-0.1993	-1.3548	4.4263	4.6468	1.6695	-0.6193	-4.6082	1.4652	-4.2934	-4.6082	-3.458	5.3129	-2.8262	-1.4699	3.3787	9.1201	1.7009	-5.5735	-0.2498	-4.6082	-9.9658	-9.9658	-2.3147	1.8036	-3.816
GBMLGG	TCGA-HT-7468-01	3.68707	1.1706	-4.6082	-2.7274	-0.5125	4.8258	-3.6259	7.0398	3.0376	-2.4659	-5.0116	-2.2447	-9.9658	-4.2934	-9.9658	-1.685	-3.816	-0.3566	3.6793	-1.5951	4.734	6.7918	5.5018	-2.6349	-0.2328	4.5015	5.2736	1.1316	-1.0262	-2.6349	1.7532	-4.2934	-5.0116	-4.6082	5.6127	0.2762	0.03	3.9365	9.1726	2.4649	-5.0116	0.0718	-9.9658	-9.9658	-9.9658	-3.3076	-0.4325	-9.9658
GBMLGG	TCGA-02-2483-01	4.38403	1.2756	-2.0529	-4.035	-1.5522	6.9402	-2.7274	4.5534	4.287	-1.7809	0.0718	-4.6082	-9.9658	-3.816	-3.458	1.0642	-1.8836	0.058	5.0968	-3.0469	6.4158	7.4757	5.4932	-1.7322	1.0293	3.6961	4.3709	2.4649	-0.6416	-1.4699	2.7401	-4.6082	1.0007	-2.5479	4.3155	2.1734	0.7233	3.6543	9.0082	2.826	-4.2934	2.2693	-9.9658	-9.9658	-3.816	-2.3147	2.5188	-9.9658
GBMLGG	TCGA-HT-7677-01	3.64387	1.8078	-2.7274	-4.2934	-0.5125	5.3667	-3.816	7.7868	2.7972	-3.6259	-1.0559	-3.3076	-9.9658	-5.0116	-9.9658	-0.3566	-2.2447	-0.5973	3.6861	-0.3383	4.8768	6.4	4.857	-1.4699	-0.4921	4.2699	4.2684	1.8564	-0.4131	-4.035	1.4756	-3.816	-5.0116	-3.0469	6.3144	-1.0559	-1.2828	3.4451	9.0707	2.6918	-4.035	1.2333	-9.9658	-9.9658	-9.9658	1.177	5.2616	-9.9658
GBMLGG	TCGA-76-4931-01	4.76924	2.1541	-2.2447	-2.4659	1.3167	7.2875	-2.4659	6.8084	3.7094	-3.3076	-0.3383	-3.3076	-0.6873	-9.9658	-4.2934	-0.6193	-1.6394	-1.6394	5.109	-2.6349	9.126	7.574	4.7312	-2.7274	-0.9132	4.518	4.7756	3.3787	-0.3752	-3.6259	2.4883	-4.2934	-2.0529	-1.5522	5.9461	1.4441	-0.0277	3.992	9.277	3.8827	-9.9658	1.0222	-3.816	-9.9658	-3.816	-0.1504	2.96	-9.9658
GBMLGG	TCGA-DU-A5TY-01	2.76768	1.4962	-5.5735	-3.458	1.1316	5.8961	-0.9971	7.4976	5.3541	-1.6394	1.0711	-3.6259	-9.9658	-4.6082	-5.5735	0.2642	-0.0725	2.2391	4.7619	-1.5522	5.7885	7.0339	5.1895	-2.114	1.8036	3.9856	4.5293	2.7951	0.1124	-0.1345	3.573	-2.6349	-3.6259	-0.7346	4.9905	3.8915	-0.2845	4.2781	8.9861	4.6381	-2.0529	3.0602	-9.9658	-9.9658	-5.0116	0.3231	2.7379	-9.9658
GBMLGG	TCGA-HT-8109-01	3.04792	1.105	-3.0469	-3.3076	0.1776	4.3786	-3.816	7.4949	3.2282	-9.9658	-2.3147	-3.6259	-9.9658	-9.9658	-9.9658	-1.5951	-6.5064	-3.816	3.4477	0.2642	4.4297	6.5186	5.8558	-2.6349	-1.8314	3.5022	3.9992	0.7664	-1.6394	-4.2934	1.4547	-5.0116	-9.9658	-4.6082	5.8699	1.0642	-3.458	3.5274	8.7064	1.7786	-5.5735	2.233	-9.9658	-3.6259	-9.9658	-2.9324	1.1641	-9.9658
GBMLGG	TCGA-06-0156-01	4.31215	1.14795	0.828636	-2.63491	0.651652	6.64897	-0.320122	5.75733	4.65541	-0.533204	1.7891	-2.46595	-3.04693	-9.9658	-6.50638	0.496749	-0.913207	0.305681	5.3944	-0.664288	9.36976	7.40883	5.72508	0.183968	2.54254	4.61537	5.12399	5.10355	0.9419	-1.53117	2.95529	-3.38084	1.17375	-0.771037	4.74205	4.26124	1.45731	4.4932	8.09917	5.53485	-1.66202	2.14439	-9.9658	-9.9658	-5.01154	3.07568	4.9038	-9.9658
GBMLGG	TCGA-HT-7479-01	2.41681	1.5064	-1.7809	-1.2828	0.5568	4.7756	-2.3884	7.6399	4.5663	-9.9658	1.0779	-3.6259	-9.9658	-9.9658	-9.9658	-0.4325	-3.6259	-3.1714	4.9379	-1.5105	3.8116	7.1922	6.7653	-2.0529	-0.8084	3.2236	3.7028	1.6327	-1.9379	-3.1714	2.4117	-4.035	-9.9658	-9.9658	5.5352	-1.1488	-1.5951	4.0926	8.6507	2.9875	-9.9658	2.8502	-9.9658	-9.9658	-9.9658	1.0222	5.6634	-9.9658
GBMLGG	TCGA-DB-5275-01	3.24333	1.7532	-2.6349	-3.0469	-0.3566	5.912	-3.458	6.6957	3.6983	-4.035	-2.2447	-2.3884	-9.9658	-9.9658	-5.5735	0.7664	0.7407	-2.8262	4.8699	-1.3921	4.2212	6.9759	5.9021	-0.6873	-1.3548	4.8007	5.2788	1.3679	-0.394	-5.5735	1.5064	-9.9658	-1.3921	-1.8314	6.1823	2.3981	-3.458	3.5718	8.298	4.2646	-4.2934	1.5266	-9.9658	-9.9658	-5.5735	-0.4131	4.7415	-9.9658
GBMLGG	TCGA-TM-A7C4-01	2.80118	1.5806	-2.2447	-1.1488	-0.1665	4.6206	-2.9324	7.266	2.081	-9.9658	-3.6259	-3.0469	-9.9658	-9.9658	-9.9658	-1.9942	-6.5064	-5.0116	3.9194	-1.8314	4.3133	6.8296	5.2107	-1.2142	-3.6259	3.4088	3.3993	-1.3548	-1.4699	-5.5735	1.3846	-4.6082	-9.9658	-4.2934	5.9191	-2.8262	-3.6259	3.1129	8.7938	1.3735	-9.9658	0.2277	-9.9658	-9.9658	-9.9658	-1.1172	0.8805	-9.9658
GBMLGG	TCGA-27-2523-01	4.29059	1.1316	-4.6082	-3.816	3.6301	7.0803	-4.035	6.9356	3.7699	-1.2481	0.2277	-3.6259	-1.1488	-9.9658	-4.6082	0.4552	-2.9324	-0.8863	5.4486	-4.6082	8.6406	7.5981	4.245	-2.3147	0.4125	4.0977	4.6905	1.5115	-0.6873	-3.3076	3.0446	-2.7274	-2.3884	-2.7274	5.6651	2.3953	0.7146	3.833	9.5835	2.362	-6.5064	0.1519	-9.9658	-9.9658	-9.9658	-1.1172	2.3564	-9.9658
GBMLGG	TCGA-27-1837-01	4.01258	1.8078	-4.035	-2.3884	2.4492	7.1845	-9.9658	7.0258	4.849	4.8079	-0.2671	-1.6394	-0.9686	-9.9658	-9.9658	0.7832	-3.0469	-1.685	5.8205	-4.2934	6.5461	7.1784	5.7334	-3.1714	0.517	4.9677	6.1379	1.5266	-0.1345	-5.0116	3.1426	-3.3076	-1.7322	-1.9942	6.1989	4.7496	3.5621	4.3119	8.6686	3.863	-4.035	1.5563	-9.9658	-9.9658	-3.816	0.4233	3.2389	-9.9658
GBMLGG	TCGA-DH-A7UU-01	3.70267	2.1345	-4.035	-2.114	-0.5756	5.2582	-3.816	7.3533	3.2915	-9.9658	-1.3921	-0.7834	-9.9658	-9.9658	-9.9658	0.7579	-5.0116	-4.2934	5.1359	-3.6259	5.8261	7.1014	6.2354	0.517	-4.6082	3.3577	3.9929	-0.7588	-1.3183	-4.2934	1.614	-9.9658	-4.6082	-3.458	5.4327	-2.0529	-2.0529	3.5559	8.4946	1.4859	-6.5064	1.4652	-9.9658	-9.9658	-9.9658	-0.9132	3.3017	-9.9658
GBMLGG	TCGA-06-0744-01	3.25246	2.8014	-4.6082	-5.5735	-1.3548	6.1025	-6.5064	6.3384	3.453	-3.458	-0.2671	-3.1714	-3.3076	-5.5735	-4.2934	0.7664	-2.5479	-1.2142	5.2821	-2.9324	7.4658	7.1973	4.852	-1.685	0.5069	3.1112	3.6861	1.7575	-1.5951	-3.1714	2.8442	-5.0116	-2.3147	-2.0529	4.8939	3.0127	-0.0877	3.3869	8.7884	3.1717	-5.5735	0.5568	-9.9658	-9.9658	-9.9658	-0.9686	2.108	-9.9658
GBMLGG	TCGA-HT-A4DV-01	2.63227	1.9564	-1.8314	-5.5735	-0.8339	4.0969	-4.035	6.4395	3.309	-9.9658	-4.6082	-4.6082	-9.9658	-4.6082	-9.9658	-1.2142	-2.3884	-4.2934	4.0584	-3.0469	4.9782	7.7178	6.0573	-5.5735	-0.1345	3.5436	4.366	1.4962	-0.3201	-6.5064	1.6466	-9.9658	-2.7274	-4.6082	6.2502	-3.1714	-2.0529	3.136	8.4675	0.7321	-5.5735	4.3177	-9.9658	-9.9658	-9.9658	-2.6349	1.5709	-9.9658
GBMLGG	TCGA-FG-8186-01	3.09251	1.4962	-1.9379	-2.7274	0.7407	5.2676	-2.6349	6.8579	4.1859	0.0854	-2.2447	-1.2828	-9.9658	-9.9658	-4.6082	0.044	-0.8599	-0.6193	4.2661	-2.114	4.5104	6.9759	6.2823	-1.6394	0.1124	4.9251	4.8475	2.0535	-0.9406	-3.1714	2.3366	-5.5735	-1.5105	-2.4659	5.964	3.2096	-0.2845	3.9956	9.036	3.6748	-3.6259	0.9935	-9.9658	-9.9658	-4.2934	-1.9942	3.7678	-9.9658
GBMLGG	TCGA-FG-A4MT-01	3.33625	1.4335	-9.9658	-6.5064	-0.7834	5.6537	-9.9658	5.2698	3.1344	-9.9658	-3.458	-3.816	-9.9658	-9.9658	-9.9658	-1.1488	-2.6349	-5.5735	4.1867	-9.9658	5.2906	7.296	5.6605	-1.1811	-9.9658	3.4358	4.0688	-1.7809	-2.2447	-5.5735	1.0779	-9.9658	-9.9658	-9.9658	4.7682	-4.6082	-3.6259	3.1556	8.5847	0.6425	-9.9658	-0.3752	-9.9658	-9.9658	-9.9658	-9.9658	-1.0862	-9.9658
GBMLGG	TCGA-E1-5305-01	3.45946	0.8082	-2.3147	-3.1714	-1.2828	5.3115	-3.816	6.858	3.9974	-9.9658	-2.0529	-3.3076	-9.9658	-9.9658	-9.9658	-0.8339	-2.4659	-3.1714	4.0541	-3.0469	4.6312	6.7797	6.6289	-0.7346	-3.0469	3.8002	3.3731	0.6517	-1.9379	-3.1714	1.5758	-4.6082	-9.9658	-4.6082	5.858	-1.5105	-3.0469	3.7656	8.7463	1.683	-9.9658	1.0642	-9.9658	-9.9658	-9.9658	-2.6349	1.2576	-9.9658
GBMLGG	TCGA-CS-5393-01	2.67586	1.3051	-2.4659	-4.6082	-0.0277	4.9407	-2.4659	5.479	4.2936	-9.9658	-0.1993	-3.6259	-9.9658	-4.2934	-5.5735	-1.3921	-9.9658	-5.0116	5.0009	-4.6082	2.9857	6.5322	7.0994	-2.2447	-3.816	2.6418	2.7161	-1.1172	-2.2447	-5.5735	1.9377	-5.5735	-4.035	-5.5735	4.3958	-3.816	-5.0116	3.9765	8.5131	1.5316	-5.5735	1.5366	-9.9658	-5.5735	-9.9658	-0.9686	1.5013	-9.9658
GBMLGG	TCGA-DU-6395-01	2.85196	1.7575	-3.458	-2.5479	0.2642	5.6764	-3.816	7.9339	4.0313	-9.9658	-2.3884	-4.2934	-9.9658	-9.9658	-6.5064	0.3907	0.4552	-2.1779	5.2736	-1.5522	4.7421	7.2715	5.4383	-1.0862	-2.6349	3.2737	4.9691	1.3956	-1.3183	-3.1714	1.4756	-3.816	-3.3076	-0.3022	7.0397	0.0854	-4.2934	3.644	8.7471	5.7581	-5.5735	2.7161	-5.0116	-9.9658	-9.9658	1.0847	5.3053	-9.9658
GBMLGG	TCGA-DB-A64X-01	2.02503	1.8918	-3.6259	-3.6259	-0.9406	4.5516	-5.0116	7.0688	2.043	-9.9658	-3.3076	-2.4659	-1.8836	-9.9658	-9.9658	1.3791	-5.5735	-1.3548	4.6083	-2.9324	3.6148	7.5988	5.1392	-1.8314	-2.0529	3.1311	4.4608	-0.8599	-2.1779	-2.7274	0.8246	-5.0116	-3.816	-4.6082	6.1477	-1.2481	-3.1714	2.8076	8.2065	1.1447	-9.9658	-0.7108	-9.9658	-9.9658	-9.9658	-3.816	1.6327	-9.9658
GBMLGG	TCGA-S9-A7IS-01	4.78977	2.4279	-4.6082	-6.5064	-0.8599	7.1237	-4.035	4.0584	3.5349	-2.9324	-2.114	-1.9379	-9.9658	-9.9658	-9.9658	1.2023	-2.0529	-2.7274	4.7016	-5.0116	7.6928	7.4089	5.1227	-1.5951	-0.5332	4.5374	4.6888	1.3283	-0.5756	-4.6082	1.8996	-5.0116	3.1442	-2.0529	5.0717	1.6695	-1.2142	3.4958	9.3222	1.9149	-4.035	2.4831	-9.9658	-9.9658	-9.9658	-0.7834	2.4883	-9.9658
GBMLGG	TCGA-HT-7856-01	3.18426	1.9931	-1.5951	-3.0469	0.0158	3.9289	-2.2447	6.0097	2.2482	-9.9658	-2.0529	-2.8262	-4.2934	-9.9658	-9.9658	-1.4699	-2.6349	-3.1714	3.6849	-3.816	3.5387	6.7138	6.5673	-3.458	-2.3147	2.93	2.7227	0.4125	-0.8339	-3.6259	1.9859	-9.9658	-5.0116	-6.5064	5.9388	-0.6643	-4.6082	2.6395	8.1243	1.4911	-5.5735	2.0673	-9.9658	-4.035	-9.9658	-2.3147	-0.1504	-9.9658
GBMLGG	TCGA-06-0750-01	2.96536	0.8164	-2.4659	-0.9132	1.4011	6.8032	-1.7322	3.8239	3.9947	4.2781	0.8726	-3.458	-2.4659	-3.816	-3.458	-0.2845	-1.5951	-1.1172	5.4545	-2.9324	7.8307	8.0272	5.0379	-3.816	1.2333	4.4344	5.4526	2.876	-0.6873	-1.2481	3.5374	-5.0116	-2.5479	-2.8262	5.0357	6.3022	2.328	3.6219	8.0092	5.4816	-4.6082	3.9819	-9.9658	-9.9658	-9.9658	-0.1665	3.7302	-9.9658
GBMLGG	TCGA-32-5222-01	3.50462	0.537	-0.0574	-2.9324	1.3791	6.3178	-2.7274	6.0687	5.4373	3.2915	0.2762	-3.6259	-1.2481	-5.5735	-9.9658	-1.4699	-2.4659	-1.5522	5.0926	-3.458	7.5433	6.7308	4.9575	-3.3076	0.8961	4.2297	4.4443	1.7141	-1.2142	-1.5522	2.4465	-4.2934	-1.5522	-1.6394	3.6428	6.2565	1.614	4.8289	9.2808	2.5731	-4.6082	0.434	-9.9658	-9.9658	-9.9658	0.7579	3.7804	-9.9658
GBMLGG	TCGA-QH-A6XA-01	2.77184	1.2636	-3.6259	-5.5735	-0.2845	5.0951	-3.458	7.4835	3.6497	-5.0116	-5.5735	-3.0469	-9.9658	-9.9658	-9.9658	-0.3383	-5.0116	-6.5064	4.8314	-1.5951	4.2661	7.0538	6.2692	-2.0529	-3.1714	2.791	3.3492	-0.394	-1.7809	-4.2934	1.2576	-9.9658	-9.9658	-4.2934	5.4516	-5.0116	-3.3076	3.8279	8.9681	1.6558	-9.9658	1.7617	-9.9658	-9.9658	-9.9658	0.5666	5.0794	-9.9658
GBMLGG	TCGA-P5-A77W-01	2.49567	1.7617	-5.0116	-5.5735	-1.8314	4.0773	-2.7274	3.5791	0.8726	-9.9658	-3.6259	-9.9658	-9.9658	-9.9658	-9.9658	-1.9379	-6.5064	-2.114	2.376	-3.6259	5.5799	6.4103	3.9232	-2.5479	-2.2447	3.7421	3.1765	-1.0559	-1.7322	-2.5479	1.2992	-9.9658	-9.9658	-5.5735	5.6361	-0.8599	-4.035	2.685	8.4393	1.7828	-6.5064	-0.0425	-5.0116	-5.5735	-9.9658	-5.0116	-2.1779	-9.9658
GBMLGG	TCGA-27-2519-01	3.47246	1.7446	-3.0469	-1.2142	2.2421	5.7255	-0.9406	5.0769	4.7846	0.9038	0.9642	-9.9658	-9.9658	-3.3076	-4.2934	-0.1504	-1.9379	-0.6193	4.9218	-1.4305	6.6761	7.4154	6.1637	-2.8262	2.3337	4.034	6.1231	3.1491	0.4552	-1.2142	3.1685	-3.1714	0.605	-0.7346	4.8915	4.5485	1.3846	4.3046	7.8099	6.2493	-3.3076	2.8542	-9.9658	-9.9658	-5.0116	0.3796	3.4661	-9.9658
GBMLGG	TCGA-CS-4942-01	3.43566	4.7258	-4.2934	-1.5105	0.605	5.3402	-0.9406	8.791	5.6767	-0.9971	-0.5543	-9.9658	-9.9658	-9.9658	-9.9658	0.058	-2.114	-0.4719	5.4797	-1.4699	3.2841	7.2977	7.0257	-3.458	-0.6643	5.2068	6.8664	2.4252	-0.9406	-4.6082	2.2237	-3.6259	-4.035	-2.3147	5.443	1.8404	-1.8314	4.7361	8.8275	2.5828	-5.0116	2.1798	-9.9658	-9.9658	-5.5735	-1.0862	1.2696	-9.9658
GBMLGG	TCGA-CS-6186-01	3.56804	2.1411	-3.6259	-2.9324	0.8568	6.0747	-2.5479	7.9428	3.6793	-3.6259	-1.3548	-3.0469	-9.9658	-9.9658	-9.9658	-3.0469	-3.458	-3.3076	4.7581	-3.3076	5.6011	6.9758	6.0005	-3.0469	-3.1714	3.3047	3.8289	0.2642	-0.9971	-2.8262	3.421	-4.2934	-9.9658	-3.0469	4.722	4.0322	-1.1488	3.4318	9.0748	2.6395	-9.9658	0.3346	-9.9658	-9.9658	-4.6082	-1.3921	0.9343	-9.9658
GBMLGG	TCGA-DU-7008-01	3.56319	1.9931	-2.1779	-3.3076	-0.6643	5.5668	-5.5735	7.1067	2.8055	-5.5735	-3.6259	-2.2447	-9.9658	-9.9658	-9.9658	-0.6416	-4.2934	0.4967	4.2165	-1.8836	4.1482	7.1555	5.4236	-0.2845	-2.7274	4.182	4.917	0.5271	-1.0559	-5.0116	1.125	-9.9658	-3.816	-6.5064	5.0211	-2.2447	-2.8262	3.1129	8.4034	1.3901	-9.9658	-0.394	-9.9658	-9.9658	-5.5735	-3.0469	0.9115	-9.9658
GBMLGG	TCGA-HT-7688-01	3.05488	1.5115	-2.114	-6.5064	0.1648	4.691	-4.035	6.2167	2.3222	-9.9658	-0.4325	-2.7274	-9.9658	-9.9658	-6.5064	-0.9406	-5.0116	-3.1714	3.1955	-3.1714	3.7539	6.6503	5.0657	-2.114	-1.2142	4.1136	3.8461	0.4125	-1.0862	-2.6349	1.6327	-4.6082	-5.0116	-3.816	6.213	-1.2142	-3.1714	3.1311	8.4169	1.5013	-5.5735	2.8916	-4.6082	-4.6082	-9.9658	-0.8863	4.5916	-9.9658
GBMLGG	TCGA-DU-A7T8-01	3.09931	2.5313	-2.114	-2.0529	0.4125	5.2548	-1.2481	6.7061	3.4713	0.9038	-0.2671	-1.1488	-9.9658	-9.9658	-9.9658	0.7493	-2.114	-1.8314	5.0505	-2.2447	3.1733	6.9069	5.8415	-0.8084	0.4016	3.6405	4.1796	1.3225	-0.5756	-3.0469	1.9034	-3.458	-5.0116	-3.0469	5.4276	3.0706	-0.3752	3.1604	8.5218	3.5899	-4.2934	-0.1504	-4.2934	-9.9658	-5.5735	-1.9942	4.673	-9.9658
GBMLGG	TCGA-DU-A6S3-01	2.53851	1.7273	-4.6082	-4.2934	-2.7274	4.0782	-5.0116	4.4364	0.1648	-9.9658	-3.458	-3.6259	-9.9658	-5.0116	-4.6082	-0.7346	-9.9658	-4.035	2.9356	-4.2934	3.928	6.519	4.4263	-3.458	-2.6349	3.2313	2.9032	-0.7108	-1.0862	-5.0116	0.4447	-9.9658	-3.3076	-9.9658	5.2851	-2.9324	-4.2934	2.081	8.0038	0.6425	-9.9658	1.4756	-4.035	-5.5735	-9.9658	-4.035	1.3623	-9.9658
GBMLGG	TCGA-DB-A64U-01	2.91646	2.2175	-5.5735	-4.6082	-0.3022	5.1538	-4.2934	6.7861	3.2602	-5.5735	-0.6873	-4.2934	-9.9658	-9.9658	-9.9658	-0.4521	-6.5064	-5.0116	4.5571	-1.3183	4.2056	7.0576	5.3726	-1.4305	-2.6349	3.6905	3.9792	-0.5543	-0.6193	-4.2934	1.7575	-9.9658	-9.9658	-6.5064	6.2388	-1.9942	-5.0116	3.3897	8.8746	1.4911	-9.9658	3.2496	-3.816	-4.035	-5.0116	-0.5973	3.4197	-9.9658
GBMLGG	TCGA-HT-A61C-01	5.11772	1.4335	-9.9658	-4.2934	1.8078	7.2039	-1.6394	4.4067	4.6548	3.9156	-0.3752	-5.5735	-9.9658	-9.9658	-5.5735	2.2872	-1.2481	-1.2481	5.1526	-2.9324	7.7942	7.4169	4.8709	-2.8262	1.2394	3.4451	4.6451	3.2189	0.03	-3.458	3.074	-3.3076	0.8647	-1.7809	5.756	5.7819	1.4011	3.7389	9.0858	3.6827	-3.0469	2.1734	-2.6349	-9.9658	-9.9658	0.3231	3.3549	-9.9658
GBMLGG	TCGA-12-0821-01	3.90786	0.9789	-0.8863	-0.4325	-1.4699	6.9106	-5.0116	6.524	3.4778	-9.9658	-1.1811	-3.816	-0.1665	-9.9658	-9.9658	-0.1345	-1.8836	-1.5951	4.6566	-1.4699	8.7072	7.5384	4.5417	-2.8262	0.4552	4.1203	5.0597	1.7912	-0.6643	-2.5479	3.027	-5.5735	-3.0469	-2.7274	4.5299	1.6374	0.099	4.4764	9.1318	3.6428	-5.0116	-0.1031	-9.9658	-9.9658	-9.9658	-0.5756	1.4011	-9.9658
GBMLGG	TCGA-TQ-A7RF-01	3.06006	1.6695	-9.9658	-4.2934	0.7493	5.2972	-3.816	7.1223	3.136	-9.9658	-1.2828	-2.5479	-9.9658	-9.9658	-9.9658	-0.9971	-2.9324	-3.3076	5.4976	-3.1714	4.6053	8.1907	5.6963	-0.2498	-1.2481	3.834	4.3786	0.6699	-1.0262	-4.2934	1.3846	-5.5735	-3.0469	-3.458	5.3248	-1.5951	-3.3076	3.3979	8.9791	2.9674	-9.9658	0.1388	-9.9658	-9.9658	-9.9658	-1.4699	2.9243	-9.9658
GBMLGG	TCGA-19-2619-01	4.35187	2.2603	-0.7108	-6.5064	0.7832	6.9823	-2.3884	6.1837	3.055	-3.458	-0.6416	-9.9658	-2.114	-4.6082	-4.6082	-0.4719	-3.458	-3.6259	5.7154	-1.685	9.3687	7.3506	4.9251	-2.8262	-1.2481	4.2503	5.3477	2.1114	-1.9379	-4.035	2.2237	-9.9658	0.547	-3.1714	6.4484	3.7105	-1.5951	4.6548	9.0457	4.4536	-4.6082	1.1897	-9.9658	-9.9658	-9.9658	0.2998	3.1179	-9.9658
GBMLGG	TCGA-F6-A8O3-01	3.59931	1.674	-3.3076	-4.6082	-1.8314	5.1115	-5.5735	7.3585	1.5165	-4.035	-6.5064	-4.2934	-2.8262	-4.6082	-6.5064	-0.394	-3.816	-3.458	3.2158	-2.5479	4.6554	7.2435	4.8783	-2.6349	-0.9686	2.945	2.6019	-0.1665	-1.3183	-4.035	0.4447	-9.9658	-3.1714	-6.5064	5.5429	-2.8262	-2.7274	3.2343	9.1031	1.2875	-9.9658	-0.3022	-9.9658	-9.9658	-9.9658	-3.816	2.1638	-9.9658
GBMLGG	TCGA-R8-A6ML-01	3.33347	0.7058	-5.5735	-2.9324	-1.1488	4.8334	-3.6259	6.1371	0.7321	-5.5735	-3.3076	-3.3076	-9.9658	-9.9658	-9.9658	-1.5105	-4.035	-0.1665	3.4358	-1.8836	4.1612	7.1642	4.096	-3.816	-0.6416	4.5224	5.0841	0.5955	-0.7834	-4.6082	0.2154	-5.0116	-1.9379	-3.458	5.2219	-1.8836	-1.8836	3.0602	8.866	1.2992	-9.9658	0.099	-9.9658	-9.9658	-9.9658	-9.9658	-1.4699	-9.9658
GBMLGG	TCGA-DU-A5TT-01	3.01255	0.4016	-1.6394	0.547	0.1519	4.9915	-0.394	5.6809	3.6748	-4.035	0.3685	-2.3147	-3.0469	-4.6082	-9.9658	-0.6643	-3.458	-3.1714	4.499	-1.9942	5.4887	7.014	6.4199	-0.1828	-2.1779	3.2707	4.4149	1.0363	-0.8339	-4.2934	1.196	-9.9658	-3.1714	-3.3076	5.1165	1.5165	-1.9379	3.4713	8.4011	2.0535	-4.035	1.4335	-9.9658	-9.9658	-4.2934	0.5955	4.4074	-9.9658
GBMLGG	TCGA-QH-A870-01	2.90302	1.2455	-5.5735	-2.114	0.6145	4.5473	-5.5735	8.5098	3.034	-9.9658	-2.3147	-3.816	-9.9658	-9.9658	-9.9658	-2.8262	-2.7274	-4.035	4.6206	-0.9406	4.927	8.0502	5.6888	-4.6082	-2.2447	4.0985	4.9393	-0.7108	-1.9942	-6.5064	1.9188	-9.9658	-4.6082	-3.816	4.8248	-2.2447	-4.035	3.6018	8.8749	2.3423	-9.9658	-0.4131	-9.9658	-9.9658	-9.9658	-2.1779	1.1706	-9.9658
GBMLGG	TCGA-DB-A75O-01	2.62994	1.4388	-2.3147	-3.458	-0.8339	4.7033	-4.2934	5.2072	4.0901	-3.3076	-1.3183	-4.2934	-9.9658	-5.5735	-9.9658	-1.2142	-5.5735	-4.035	5.9298	-2.3147	3.4411	7.8901	8.0595	-1.9379	-1.2828	3.5863	5.382	-1.3921	-1.4699	-6.5064	1.5465	-5.5735	-9.9658	-3.0469	6.3191	0.1903	-6.5064	3.2143	8.2772	3.0791	-9.9658	1.8604	-9.9658	-9.9658	-9.9658	-2.114	-0.1993	-9.9658
GBMLGG	TCGA-HT-8111-01	3.20003	1.5165	-1.7809	-4.2934	-0.5543	4.9658	-2.7274	7.4415	3.9374	-1.3548	-1.7322	-3.1714	-9.9658	-5.5735	-9.9658	-1.1488	-2.6349	-1.6394	4.9709	-0.9132	3.9118	7.216	7.2582	-1.8836	-0.2159	3.5706	4.1612	2.1345	-0.1993	-1.5522	1.8282	-5.0116	-5.0116	-4.2934	5.5445	-0.1665	1.0433	4.0977	8.7412	2.7657	-2.5479	1.9749	-9.9658	-9.9658	-9.9658	-2.5479	-0.5756	-9.9658
GBMLGG	TCGA-S9-A7QZ-01	3.30305	2.3564	-2.1779	-2.2447	-1.2481	4.3979	-2.3147	4.5243	1.3511	-2.3884	-2.8262	-0.6193	-9.9658	-9.9658	-5.5735	0.3796	-5.0116	-4.035	3.6312	-2.1779	5.0036	6.8924	5.7656	-2.1779	-2.9324	4.2541	3.871	-0.394	-0.3566	-6.5064	0.8961	-5.5735	-3.3076	-5.5735	5.0717	-1.1811	-1.9379	3.2435	8.4616	0.1257	-5.5735	0.4125	-9.9658	-9.9658	-9.9658	-3.6259	-0.0574	-9.9658
GBMLGG	TCGA-12-0619-01	3.76019	1.0007	-0.0574	-4.2934	1.9601	6.6371	0.7407	5.4115	5.0246	0.1257	2.6579	-3.458	-2.2447	-2.8262	-2.8262	2.1378	0.1519	-0.6643	5.8758	-1.6394	8.6051	6.7644	6.2614	-0.7834	1.0363	4.433	5.9706	2.872	0.8246	-3.1714	2.4883	-5.5735	1.5902	-1.1811	3.7127	3.6657	1.0151	4.3855	8.4557	4.8309	-2.9324	2.7314	-9.9658	-9.9658	-9.9658	0.7407	3.9682	-9.9658
GBMLGG	TCGA-DB-5273-01	2.9616	1.1316	-4.6082	-3.0469	0.03	5.5119	-5.0116	7.8505	4.6955	-2.1779	0.537	-9.9658	-9.9658	-9.9658	-5.0116	-0.3383	-3.458	-2.8262	5.0985	-2.8262	3.4048	6.8743	6.6036	-2.5479	-0.1665	3.5803	4.7263	1.1447	-1.3548	-4.2934	2.7205	-5.5735	-9.9658	-5.5735	6.2333	0.3685	0.346	4.0287	8.8454	2.9655	-6.5064	2.828	-9.9658	-9.9658	-9.9658	0.434	3.9956	-9.9658
GBMLGG	TCGA-HT-7470-01	3.02676	1.3225	-3.1714	-3.0469	-0.3566	4.839	-3.1714	7.4389	3.4984	-4.6082	-2.5479	-3.6259	-9.9658	-5.5735	-9.9658	-1.9379	-5.0116	-4.6082	4.3356	-2.3884	3.4971	6.8236	6.2485	-0.8084	-3.0469	3.5237	4.3133	-0.6643	-1.5951	-5.5735	1.5612	-6.5064	-9.9658	-5.5735	6.2097	-2.114	-2.3884	3.7496	8.6853	1.9786	-9.9658	2.7205	-9.9658	-9.9658	-9.9658	-1.1172	1.412	-9.9658
GBMLGG	TCGA-FG-A4MY-01	2.68262	0.9115	-2.7274	-3.458	-0.8863	4.8881	-5.5735	5.6577	2.9262	-9.9658	-2.4659	-1.8836	-9.9658	-9.9658	-9.9658	0.4016	-0.8084	-0.6193	4.734	-4.6082	3.3061	7.0508	5.1887	-3.0469	-2.1779	3.5706	4.0918	0.4865	-2.8262	-3.0469	1.412	-9.9658	-9.9658	-3.816	6.3425	-0.1828	-4.035	2.4985	8.1971	3.7625	-5.0116	3.034	-9.9658	-9.9658	-9.9658	-1.3921	1.3167	-9.9658
GBMLGG	TCGA-HT-8108-01	2.94114	1.4911	-3.0469	-3.6259	-0.2159	5.1799	-2.3884	7.339	4.7236	-1.5951	-0.5756	-2.6349	-9.9658	-9.9658	-9.9658	-0.0725	-5.0116	-2.3147	4.5838	-3.0469	4.7016	6.9438	6.7873	0.517	-0.7834	4.7274	5.1611	0.7916	-1.9942	-3.1714	2.1638	-4.035	-9.9658	-1.3921	5.6215	1.7489	-0.8084	4.3456	8.9635	0.5859	-4.6082	0.2762	-9.9658	-9.9658	-9.9658	-3.3076	0.2277	-9.9658
GBMLGG	TCGA-DB-A4XE-01	3.84496	1.7141	-1.7322	-2.2447	-0.6416	5.342	-4.035	7.8543	3.869	-9.9658	-0.6193	-2.8262	-9.9658	-9.9658	-5.5735	0.0014	-5.5735	-9.9658	4.8233	-1.9942	3.4237	7.0635	6.3667	-1.9379	-3.3076	3.705	4.1194	-1.1172	-1.1811	-6.5064	2.1766	-9.9658	-2.0529	-2.3884	6.0337	-2.5479	-5.0116	3.7182	8.91	1.3956	-9.9658	1.0983	-4.2934	-9.9658	-5.0116	-1.6394	0.3685	-9.9658
GBMLGG	TCGA-HT-A4DS-01	4.21563	1.2394	-4.2934	-3.458	-0.0277	5.8863	-1.685	4.1078	4.2472	-1.0559	-4.035	-0.6416	-1.5951	-9.9658	-4.6082	1.5165	-1.9942	-2.1779	5.4512	-4.6082	2.5061	8.8193	6.0061	-2.9324	2.0325	2.7422	2.7205	3.1028	0.4233	-3.0469	3.7039	-3.3076	-2.5479	-5.5735	4.6376	2.7679	0.5069	3.2677	7.8496	1.9931	-3.6259	1.4911	-9.9658	-9.9658	-4.035	-1.9942	0.8568	-9.9658
GBMLGG	TCGA-DU-8158-01	3.3561	0.3346	-2.0529	1.2394	1.5165	5.5862	0.2277	5.0166	4.5028	-1.3183	-0.4719	-3.1714	-1.3548	-5.0116	-4.6082	-0.1031	-0.4521	-0.1828	5.0951	-0.7108	5.554	6.5687	6.91	-1.7809	2.7073	3.9478	3.2251	4.2227	1.5415	-1.3548	3.5009	-1.5522	1.8722	-2.0529	5.8143	2.9655	1.949	3.863	7.7041	3.5498	-1.9379	2.3135	-9.9658	-9.9658	-3.458	1.0573	2.8661	-5.5735
GBMLGG	TCGA-HT-7474-01	2.68262	1.4065	-2.5479	-3.1714	-0.4921	4.225	-2.7274	8.0807	2.5288	-9.9658	-3.458	-4.2934	-9.9658	-9.9658	-9.9658	-1.5951	-5.0116	-1.9942	3.7127	-3.1714	3.2481	7.0291	5.3772	-2.8262	-1.3921	4.0549	4.7661	0.7748	-0.9971	-4.035	1.4441	-4.6082	-9.9658	-4.6082	6.6945	0.4447	-0.7346	3.208	8.5119	1.4704	-6.5064	3.4674	-3.816	-5.5735	-5.5735	-2.7274	0.5568	-9.9658
GBMLGG	TCGA-DH-5143-01	3.11106	1.0503	-4.2934	-2.8262	0.537	5.0063	-5.0116	8.4303	4.3597	-3.458	0.0718	-9.9658	-9.9658	-9.9658	-9.9658	-1.6394	-3.6259	-3.458	4.7544	-2.8262	3.3192	7.0594	6.524	-1.6394	-1.6394	3.6737	5.2126	0.2277	-1.3183	-4.6082	1.9712	-6.5064	-9.9658	-4.6082	6.1675	-0.4521	-4.035	3.9308	8.7587	2.4831	-9.9658	0.1903	-9.9658	-9.9658	-4.6082	0.5955	4.9393	-9.9658
GBMLGG	TCGA-TQ-A7RJ-01	2.85601	2.036	-2.3884	-2.3147	0.2277	5.1579	-4.035	6.9395	4.2684	-9.9658	-0.3383	-2.0529	-9.9658	-9.9658	-9.9658	0.058	-3.3076	-3.816	5.434	-2.3147	4.5367	7.25	6.8591	-1.685	-2.1779	3.4143	3.7699	0.1388	-1.5522	-4.6082	1.5064	-6.5064	-4.035	-9.9658	4.9612	-3.1714	-4.2934	3.7919	8.6652	1.9895	-6.5064	2.1378	-9.9658	-9.9658	-9.9658	-3.0469	0.1519	-9.9658
GBMLGG	TCGA-S9-A7QY-01	2.40051	1.7995	-5.0116	-4.035	-1.1488	4.4088	-3.6259	5.5414	2.5137	-9.9658	-5.5735	-2.9324	-9.9658	-4.6082	-9.9658	-1.3183	-4.6082	-3.6259	4.0935	-0.4921	4.3855	7.4413	5.0913	-2.4659	-2.1779	2.9929	3.1572	0.2642	-0.1031	-4.6082	1.0363	-9.9658	-5.0116	-3.6259	5.904	-1.1811	-3.1714	2.7095	8.39	1.7702	-9.9658	2.4279	-3.458	-9.9658	-9.9658	-3.0469	-0.5756	-9.9658
GBMLGG	TCGA-DB-A4XA-01	2.99277	2.236	-9.9658	-4.6082	-0.4719	4.591	-3.6259	7.3857	2.9432	-9.9658	0.2642	-5.0116	-9.9658	-9.9658	-9.9658	0.5069	-3.816	0.3796	3.9938	-0.3752	4.481	7.4767	5.4283	-2.1779	0.3231	2.6624	2.9544	2.296	-1.1811	-1.7809	1.7532	-9.9658	-3.458	-4.6082	6.4458	-0.4325	-2.6349	3.2158	8.42	2.8361	-4.6082	1.4756	-9.9658	-9.9658	-9.9658	-3.3076	0.4865	-9.9658
GBMLGG	TCGA-28-5213-01	2.848	1.2147	-0.2159	-0.6416	-0.3752	5.8412	-0.1993	4.2064	5.8545	1.0642	2.9243	-9.9658	-0.5332	-9.9658	-9.9658	-1.3548	-1.3183	1.0222	4.8069	-0.5332	6.4707	6.9661	6.3521	-4.035	2.7161	4.7746	4.95	5.2273	0.7058	0.2277	3.2692	-1.685	1.8404	-0.4719	4.4758	3.9251	0.0014	5.1326	8.6135	4.6177	-2.114	3.6405	-9.9658	-9.9658	-9.9658	1.5612	4.637	-9.9658
GBMLGG	TCGA-P5-A731-01	2.60172	1.0573	-3.1714	-4.2934	1.4704	5.1977	-9.9658	6.3496	2.909	-1.7322	-1.0262	-4.2934	-9.9658	-9.9658	-5.5735	-1.4699	-3.458	-2.7274	4.7388	-1.9379	7.1424	7.3247	5.257	-4.035	-0.8599	4.3449	5.0466	0.2998	-1.5951	-1.4699	2.2693	-5.5735	1.0711	-4.6082	5.6218	1.8201	-1.6394	3.2737	8.5943	3.8044	-5.5735	1.105	-9.9658	-9.9658	-9.9658	-1.5105	1.334	-9.9658
GBMLGG	TCGA-E1-A7YE-01	3.49696	1.3511	-4.035	-4.035	0.1903	6.721	-1.2828	5.0387	5.3844	-3.458	3.1458	-0.9686	-9.9658	-5.5735	-5.5735	-0.0277	0.7058	-3.0469	5.8985	-1.685	6.9106	7.0998	6.5258	-0.7346	-0.3383	5.779	6.1777	0.8488	-0.9971	-1.5522	2.3308	-5.0116	-2.6349	-1.2142	5.8197	-1.7809	-3.3076	4.3364	8.5502	3.5149	-9.9658	3.3293	-9.9658	-9.9658	-4.2934	0.3685	6.7327	-9.9658
GBMLGG	TCGA-FG-A710-01	3.24941	1.7532	-5.5735	-3.1714	0.6699	5.8956	-2.3884	6.6661	4.7762	-0.8599	-0.1504	-4.6082	-3.458	-5.5735	-9.9658	1.1184	1.1117	0.4967	5.5988	-1.6394	3.8208	7.4196	5.9139	-1.9379	-0.0277	4.4556	5.7769	1.7617	-0.5332	-3.6259	2.376	-4.035	-1.3183	-1.4305	6.3978	3.8581	1.9302	4.0251	8.7273	3.9524	-4.6082	2.1606	-3.3076	-9.9658	-2.9324	-0.7588	2.971	-9.9658
GBMLGG	TCGA-HT-8010-01	2.9616	1.736	-2.1779	-5.5735	-0.2328	4.0287	-3.1714	6.8988	2.685	-9.9658	-4.035	-3.6259	-9.9658	-5.5735	-9.9658	-2.114	-5.5735	-5.5735	3.9412	1.2696	4.4509	7.2733	6.6232	-5.5735	-2.6349	3.4384	3.8798	0.3231	-1.2481	-2.8262	1.9601	-4.035	-2.9324	-9.9658	5.0884	-3.458	-2.1779	3.325	8.4604	1.6695	-9.9658	1.2576	-9.9658	-9.9658	-9.9658	-1.3183	2.8482	-9.9658
GBMLGG	TCGA-DU-7299-01	2.95602	1.4911	-3.1714	-1.8836	-0.2328	5.6485	-5.0116	6.7566	4.3583	-6.5064	0.0158	-3.1714	-2.4659	-9.9658	-6.5064	-0.5125	-5.5735	-3.458	4.7377	-2.4659	3.8239	6.9613	6.3623	-0.3566	-3.6259	3.7083	3.0774	0.1519	-1.0862	-9.9658	1.8404	-5.5735	-5.0116	-4.2934	5.1273	-1.8836	-4.2934	4.2706	8.8945	1.7575	-9.9658	2.081	-9.9658	-9.9658	-9.9658	-0.8339	1.0151	-9.9658
GBMLGG	TCGA-DB-5270-01	2.79288	1.787	-2.6349	-1.8836	0.4865	4.8294	-2.3884	7.5895	3.5899	-2.1779	0.6517	-4.6082	-9.9658	-9.9658	-9.9658	-0.9971	-4.2934	-1.5951	4.673	-1.5522	4.149	7.0779	5.9586	-1.8314	0.6699	3.6324	4.4149	1.736	-1.0862	-3.3076	2.118	-3.0469	0.0718	-5.0116	6.3043	2.4831	0.547	3.4224	8.4798	3.1733	-5.5735	1.8119	-3.816	-5.5735	-4.6082	0.3685	5.523	-9.9658
GBMLGG	TCGA-14-0789-01	2.96901	1.2147	-2.114	-3.816	3.4997	7.13	-0.4719	3.7867	5.2354	-0.4325	1.9226	-9.9658	-9.9658	-9.9658	-5.0116	-0.5125	-1.5105	-1.3921	6.6093	-1.7322	9.7333	7.0534	5.8733	-9.9658	0.8647	4.9928	6.4648	2.8341	0.1903	-0.0425	3.1045	-2.5479	1.0363	-0.7588	5.3484	1.8957	0.605	4.441	8.3302	6.4585	-1.8314	2.9032	-9.9658	-9.9658	-3.6259	2.4279	6.1926	-9.9658
GBMLGG	TCGA-KT-A74X-01	3.61353	2.05	-4.035	-3.6259	-1.685	5.1514	-4.2934	3.3647	1.8918	-4.035	-2.6349	-3.1714	-9.9658	-5.0116	-9.9658	-0.5543	-3.458	0.6969	3.6804	-1.7322	4.5614	7.3903	4.468	-2.1779	-0.0425	3.8798	4.3639	1.3454	-0.1504	-2.5479	0.4657	-4.035	-4.2934	-3.458	5.4871	0.434	-1.7809	3.3134	8.3525	2.2931	-5.0116	0.8647	-9.9658	-9.9658	-5.5735	-4.035	-0.1031	-9.9658
GBMLGG	TCGA-DB-A75L-01	2.93923	1.7575	-3.3076	-3.458	-0.0725	4.916	-4.035	7.0006	3.2826	-9.9658	-2.3884	-3.458	-9.9658	-9.9658	-9.9658	0.0158	-6.5064	-4.035	4.7861	-3.3076	5.5617	7.2789	6.1443	-1.1172	-2.9324	3.3773	3.8391	-2.7274	-2.4659	-4.6082	1.7912	-6.5064	-9.9658	-4.6082	5.0571	-2.114	-2.5479	3.5633	8.975	1.0711	-9.9658	1.2455	-9.9658	-9.9658	-9.9658	-1.9942	1.6093	-9.9658
GBMLGG	TCGA-HT-A616-01	2.50332	1.4065	-3.1714	-4.2934	-0.5332	4.5982	-5.5735	7.9421	3.1523	-9.9658	-4.035	-2.3884	-9.9658	-9.9658	-9.9658	0.1776	-5.5735	-6.5064	4.048	-2.5479	3.4102	6.9678	5.6696	-1.9942	-1.9379	2.3536	2.4779	-0.9686	-1.8314	-6.5064	1.7097	-9.9658	-4.6082	-9.9658	5.9663	-2.7274	-5.0116	2.9637	8.6187	2.183	-9.9658	0.9343	-9.9658	-9.9658	-9.9658	0.4016	3.3952	-9.9658
GBMLGG	TCGA-HT-A74K-01	2.75913	1.9675	-9.9658	-9.9658	-2.8262	5.0562	-2.4659	3.7561	2.1702	-1.7809	-2.9324	-3.1714	-9.9658	-9.9658	-4.2934	0.2881	-4.035	-1.9379	5.1157	-2.8262	6.0947	8.3248	5.0018	-3.816	-1.8836	1.816	3.3911	1.0222	-0.4521	-2.0529	2.5263	-9.9658	-5.0116	-4.6082	5.0566	-2.3147	-2.7274	2.6984	8.2366	1.3397	-9.9658	2.3926	-9.9658	-9.9658	-9.9658	-6.5064	-1.6394	-9.9658
GBMLGG	TCGA-WY-A85C-01	2.38405	2.1957	-2.5479	-1.7322	-0.7588	4.7049	-4.6082	5.0379	2.7227	-4.6082	-3.6259	-1.9942	-2.8262	-4.6082	-9.9658	0.4967	-3.816	-2.7274	3.9468	-3.3076	4.2095	6.7737	5.9616	0.547	-3.1714	3.4048	2.0289	0.2998	-0.7834	-3.816	1.5661	-6.5064	-4.2934	-3.816	4.4283	-1.9942	-5.0116	3.3206	8.5276	2.183	-5.5735	-0.0574	-9.9658	-9.9658	-9.9658	-2.2447	5.1543	-9.9658
GBMLGG	TCGA-FG-8188-01	2.84998	1.3791	-9.9658	-3.1714	0.2642	4.9695	-9.9658	8.6669	4.001	-9.9658	-2.1779	-1.4305	-9.9658	-9.9658	-9.9658	-0.4921	-3.6259	-2.3884	4.7329	-2.7274	4.7512	6.8914	6.5384	-1.4699	-2.8262	2.9281	1.1577	-0.7834	-1.8314	-4.6082	2.183	-5.5735	-9.9658	-4.035	5.852	-1.5951	-5.0116	3.8521	8.8068	2.2573	-9.9658	1.5216	-9.9658	-5.0116	-9.9658	-2.4659	3.716	-9.9658
GBMLGG	TCGA-DU-A6S7-01	3.07037	1.7273	-5.5735	-1.9379	1.2815	5.3209	-1.8314	6.6986	4.2676	-9.9658	-1.5951	-2.5479	-9.9658	-9.9658	-9.9658	0.434	-6.5064	-5.5735	5.3688	-4.035	4.4122	7.2999	6.8411	-1.6394	-4.6082	3.6335	2.8178	-1.9942	-1.8314	-2.9324	1.7744	-9.9658	-9.9658	-3.458	5.7517	-2.9324	-9.9658	3.9506	8.9522	2.496	-6.5064	1.3454	-9.9658	-9.9658	-9.9658	-2.8262	0.058	-9.9658
GBMLGG	TCGA-DU-7294-01	3.28096	0.7579	-4.2934	-3.6259	-1.685	5.0045	-3.816	6.4375	2.7594	-9.9658	-9.9658	-2.9324	-9.9658	-9.9658	-5.0116	-1.3548	-4.2934	-2.114	3.1892	-1.3183	4.1716	6.1677	5.2153	-2.1779	-2.1779	3.1829	3.7006	0.24	-1.4305	-4.6082	0.7058	-6.5064	-9.9658	-5.5735	5.5261	-3.816	-1.5951	3.245	8.9736	0.4233	-9.9658	0.1776	-9.9658	-9.9658	-9.9658	-4.035	-2.8262	-9.9658
GBMLGG	TCGA-DB-5274-01	2.94488	0.8246	-9.9658	-2.8262	-2.3884	4.6634	-0.9132	2.874	2.4623	-0.8339	-0.9406	-5.0116	-9.9658	-9.9658	-9.9658	0.1776	-4.6082	-1.5522	3.1327	-1.685	2.7636	7.7586	4.1859	-2.3884	0.7916	2.05	3.7083	2.0742	-0.4719	-2.6349	0.7664	-9.9658	-2.8262	-4.6082	3.9543	-0.5756	-0.5973	2.3981	7.8253	0.099	-6.5064	0.6239	-2.1779	-9.9658	-9.9658	-4.035	1.8643	-9.9658
GBMLGG	TCGA-28-5209-01	4.38194	1.5366	-9.9658	-2.4659	0.679	7.7125	-2.7274	7.3884	3.4424	3.0217	-1.2142	-3.6259	-0.6873	-4.035	-3.458	-1.3183	-3.0469	-1.3921	5.331	-3.6259	9.04	7.3688	4.6949	-3.6259	0.1257	4.4926	5.3685	0.7999	-2.3147	-2.4659	3.0961	-3.6259	-4.2934	-1.9942	5.7178	5.436	0.2029	4.3958	9.3714	3.5136	-6.5064	1.3679	-9.9658	-9.9658	-9.9658	-1.5522	2.7249	-9.9658
GBMLGG	TCGA-HT-7604-01	3.3813	1.5806	-4.035	-2.8262	-0.5543	5.2649	-4.2934	7.9425	3.0217	-9.9658	-0.7834	-3.458	-9.9658	-9.9658	-9.9658	-0.4719	-4.035	-6.5064	4.7672	-4.2934	3.867	7.0505	5.9035	-0.9686	-3.816	3.6405	4.7044	0.3115	-0.0877	-1.8314	1.2756	-4.2934	-9.9658	-2.8262	5.825	-0.2328	-3.1714	3.4543	9.1938	2.6579	-9.9658	0.4657	-9.9658	-9.9658	-9.9658	-1.7809	3.0961	-9.9658
GBMLGG	TCGA-TM-A84F-01	3.24638	2.1411	-4.035	-3.458	1.2147	5.2958	0.7664	6.1027	4.8905	2.694	1.3791	-2.0529	-2.0529	-5.0116	-9.9658	1.692	0.0854	1.4756	5.426	0.1903	3.5262	7.227	7.3541	-1.1488	3.1653	4.4575	5.3002	4.4556	1.2636	-0.9686	3.4791	-1.8314	-1.1811	-1.0262	5.9658	6.4854	4.1036	3.6589	7.9865	4.1294	-0.4131	2.3423	-9.9658	-9.9658	-0.7588	1.595	5.8721	-3.816
GBMLGG	TCGA-DB-A64O-01	2.76339	0.3907	-5.0116	-2.3147	0.1388	4.856	-3.1714	7.3628	3.8601	-9.9658	-2.3147	-3.3076	-9.9658	-9.9658	-9.9658	-1.1172	-3.816	-4.035	4.7474	-3.6259	4.1169	7.8297	6.0321	-4.035	-2.0529	2.5163	3.3163	0.4552	-0.6416	-6.5064	3.3047	-4.6082	-3.458	-9.9658	4.7448	0.9115	-3.6259	3.1987	8.2656	2.7073	-9.9658	2.3048	-9.9658	-9.9658	-9.9658	-1.9942	0.2029	-9.9658
GBMLGG	TCGA-HT-7884-01	3.15377	1.9264	-2.5479	-4.035	-1.3921	4.9695	-2.5479	6.9357	2.9802	-9.9658	-1.4699	-1.685	-9.9658	-9.9658	-9.9658	-0.1187	-2.9324	-5.5735	4.1433	-3.816	3.3731	6.7756	6.3084	-0.3752	-3.3076	3.8218	4.2766	-0.9971	-1.8836	-6.5064	1.0915	-5.0116	-9.9658	-9.9658	4.849	-9.9658	-4.035	3.245	8.7106	1.3511	-9.9658	2.1313	-9.9658	-4.2934	-9.9658	-3.1714	-1.5951	-9.9658
GBMLGG	TCGA-S9-A6WE-01	2.93548	1.8242	-4.2934	-3.6259	-1.3548	5.0674	-9.9658	6.011	2.5852	-9.9658	-2.114	-2.8262	-9.9658	-9.9658	-9.9658	-1.0862	-1.7809	-2.2447	3.8044	-3.0469	4.7887	7.0225	5.9374	-1.5105	-1.7322	3.869	3.6838	0.3685	-1.3921	-3.1714	0.6145	-5.5735	-9.9658	-9.9658	5.3345	-1.4305	-3.0469	3.3897	8.9027	1.0642	-9.9658	0.0854	-9.9658	-9.9658	-9.9658	-2.9324	-0.5973	-4.6082
GBMLGG	TCGA-QH-A6CY-01	2.87578	0.9716	-3.3076	-5.0116	-0.6193	4.306	-3.816	6.3681	2.3222	-3.816	-3.816	-4.035	-9.9658	-9.9658	-5.5735	-2.5479	-6.5064	-3.816	3.6612	-1.3921	3.8876	6.9683	4.7383	-2.6349	-1.3921	3.5935	4.3876	0.0718	-1.3548	-5.0116	0.7579	-9.9658	-3.3076	-9.9658	5.7143	-1.4305	-2.2447	2.9637	8.4099	0.03	-9.9658	2.5536	-9.9658	-5.0116	-9.9658	-1.4305	3.1876	-9.9658
GBMLGG	TCGA-S9-A6WM-01	3.93831	2.6067	-1.3183	-1.7322	1.9226	5.8753	-1.5522	8.1317	3.242	-9.9658	-1.2481	-9.9658	-1.7809	-4.6082	-9.9658	-1.7809	-3.3076	-1.7322	5.2536	-2.1779	5.7176	6.7743	5.3064	-2.6349	0.9642	4.9978	5.9479	1.8484	-0.7588	-2.8262	1.5709	-3.3076	-2.6349	-5.5735	5.2657	0.4552	-1.4305	3.6312	9.3353	2.3366	-5.0116	1.614	-9.9658	-9.9658	-4.6082	-0.9406	1.4011	-9.9658
GBMLGG	TCGA-28-5218-01	4.1408	1.9302	-1.7809	-2.3147	-1.8314	8.1721	6.3649	3.1062	4.0952	0.7579	2.4857	-2.7274	-9.9658	-5.0116	-5.0116	0.5763	0.6145	1.8957	6.579	0.434	3.9337	6.7481	5.5299	0.1519	4.366	3.6195	4.2699	6.1266	3.492	0.4016	4.3576	-1.0862	0.3796	-1.9379	5.479	8.2677	2.2268	4.6944	8.5603	5.4077	0.0014	4.3356	-9.9658	-9.9658	-2.2447	-1.8836	2.081	-9.9658
GBMLGG	TCGA-HT-A5RA-01	4.2411	2.3308	-1.4699	-1.7322	0.3346	6.8248	-1.8836	7.408	3.4102	2.3479	-3.1714	-1.0862	-0.4131	-3.458	-9.9658	0.4761	-2.1779	-0.0277	4.9093	-2.1779	8.898	6.8831	5.6168	-4.035	1.4065	4.8022	5.8053	3.5706	-0.3201	-3.816	3.1458	-3.1714	-9.9658	-1.3548	7.5023	7.3964	5.0077	4.4706	9.1776	4.3155	-2.4659	2.9984	-9.9658	-9.9658	-2.4659	-0.1504	2.1247	-3.6259
GBMLGG	TCGA-QH-A6CV-01	3.77928	1.7744	-1.2828	-3.816	1.2023	5.2323	-1.8836	5.4256	4.9103	-0.6643	-1.5951	-1.0559	-2.9324	-9.9658	-9.9658	-0.4719	-2.114	-1.8314	5.5255	-3.816	5.197	7.5109	6.3635	-4.6082	-0.1031	3.7378	4.5098	1.9786	-0.5543	-4.035	2.2421	-5.0116	-1.9942	-2.9324	4.4457	0.5271	-1.6394	3.8023	8.5376	0.5859	-4.6082	3.4291	-2.8262	-9.9658	-9.9658	-2.6349	0.8488	-9.9658
GBMLGG	TCGA-VM-A8CE-01	2.88943	2.0776	-4.035	-5.0116	-0.5543	5.3544	-4.2934	7.2219	3.2143	-9.9658	-2.4659	-3.1714	-9.9658	-9.9658	-5.5735	-0.2671	0.1257	-1.9942	5.0566	-0.5543	4.8783	7.2974	5.5958	-3.816	-1.7809	3.4752	3.9185	-0.3752	-0.3383	-4.035	2.1894	-5.5735	-9.9658	-4.2934	7.0174	-2.2447	-3.6259	3.3047	8.656	3.2343	-9.9658	3.0671	-9.9658	-5.0116	-9.9658	-2.1779	0.9419	-9.9658
GBMLGG	TCGA-DU-5852-01	3.65537	2.4117	-2.4659	-6.5064	1.0983	6.3898	-3.6259	7.3493	4.6253	-1.1811	0.6239	-3.458	-1.685	-5.5735	-9.9658	-0.3201	-2.114	-0.9132	5.0396	-2.3884	6.0108	7.3958	5.7401	-2.7274	0.517	3.9468	4.0679	1.8564	-1.9379	-2.3884	3.335	-2.3147	-1.1172	-2.1779	5.527	2.9224	2.036	4.7458	8.8616	3.1717	-2.9324	2.3308	-9.9658	-9.9658	-9.9658	0.7493	3.6006	-4.035
GBMLGG	TCGA-P5-A72U-01	2.78031	1.787	-3.816	-2.6349	1.2875	6.056	-2.7274	6.9425	2.824	-0.394	-1.685	-3.816	-9.9658	-5.0116	-3.458	-0.6193	-1.5951	-0.9406	5.922	-1.9379	4.9552	5.9729	5.7156	-4.035	1.9452	3.1781	4.0909	3.9478	1.2023	-2.5479	1.9601	-1.0262	-2.7274	-4.6082	5.1639	0.9493	-0.0574	3.3521	7.8368	4.182	-3.6259	1.5514	-9.9658	-9.9658	-4.6082	-3.1714	0.3796	-9.9658
GBMLGG	TCGA-28-2514-01	4.0934	3.0688	-1.2481	-2.0529	1.595	6.6945	-3.3076	5.9484	3.9571	-0.2328	-1.1488	-2.0529	-9.9658	-5.0116	-3.0469	-1.4699	-1.7809	-1.685	5.0361	-3.816	7.7291	6.883	5.6708	-3.816	-0.7346	4.7704	5.9282	1.2394	-2.5479	-2.2447	1.9034	-9.9658	-1.4699	-1.5522	5.7247	4.4906	1.3956	4.3428	8.7282	4.711	-9.9658	1.6695	-9.9658	-9.9658	-5.0116	-0.6643	1.9188	-4.6082
GBMLGG	TCGA-06-5859-01	4.57593	0.9642	-3.3076	-0.4719	0.6332	5.6002	1.6234	5.7811	4.8395	-1.685	2.874	-4.2934	-9.9658	-9.9658	-9.9658	-0.3022	-1.2481	-1.0262	5.3692	-2.4659	4.957	6.8491	7.4511	-3.0469	1.7954	4.7496	6.3763	3.3675	0.6969	-0.7346	1.3051	-0.8084	-1.9942	-0.9406	3.8075	4.4562	1.2023	3.9847	8.5417	2.4544	-2.3147	1.8957	-9.9658	-9.9658	-5.0116	-0.394	3.9992	-3.6259
GBMLGG	TCGA-DB-A75K-01	2.95045	2.2513	-2.4659	-2.8262	0.4125	5.2361	-5.0116	4.0807	3.7389	-1.3548	0.6425	-2.0529	-9.9658	-5.0116	-4.035	0.4233	-1.6394	-2.3884	5.1231	-3.816	5.709	7.4688	6.2655	-2.3884	-1.9379	5.3205	5.8089	0.3231	-1.4305	-4.2934	2.3508	-9.9658	-4.6082	-2.1779	6.0299	1.6875	-2.4659	2.9224	8.6002	3.1245	-9.9658	2.1247	-4.6082	-9.9658	-9.9658	-1.1811	4.8228	-9.9658
GBMLGG	TCGA-DU-6410-01	3.71043	1.9638	-3.3076	-6.5064	-2.3147	5.3879	-2.8262	3.4648	0.7748	-9.9658	-5.0116	-5.5735	-9.9658	-4.2934	-9.9658	-1.0559	-5.5735	-4.6082	2.3135	-4.035	5.3477	5.359	3.6486	-0.5543	-2.9324	3.9838	2.7292	-4.6082	-0.9406	-9.9658	0.6699	-9.9658	-5.0116	-5.5735	4.7688	-9.9658	-4.6082	3.0706	9.0001	0.058	-9.9658	-0.7346	-9.9658	-9.9658	-9.9658	-5.5735	-2.4659	-9.9658
GBMLGG	TCGA-28-2509-01	3.8258	-0.3201	-3.458	-2.8262	1.614	7.1537	-1.2828	3.8866	4.4417	-3.0469	-1.7322	-3.458	-9.9658	-3.3076	-3.6259	-0.4131	-1.1811	-0.1504	5.403	-1.0262	9.0001	7.2909	4.9695	-3.458	0.2762	3.1245	4.4983	2.0289	-1.2481	-2.6349	1.3679	-5.5735	3.2617	-2.1779	4.7767	1.2756	-1.0862	3.3633	8.0588	4.6543	-4.6082	1.6187	-9.9658	-9.9658	-5.0116	-0.1031	2.236	-9.9658
GBMLGG	TCGA-QH-A65Z-01	2.89532	1.9749	-3.3076	-3.6259	-0.1993	4.889	-4.035	6.1715	2.5338	-9.9658	-9.9658	-1.8314	-9.9658	-9.9658	-9.9658	-1.0862	-3.3076	-2.7274	3.74	-0.7588	4.4236	7.6667	5.1764	-1.4305	-1.9942	3.869	4.538	-0.3022	-1.3921	-9.9658	1.2636	-4.6082	-4.6082	-9.9658	5.1408	-1.4699	-9.9658	3.091	8.152	1.9149	-9.9658	1.7403	-9.9658	-9.9658	-9.9658	-0.2498	4.402	-9.9658
GBMLGG	TCGA-14-1825-01	4.77348	1.2455	-1.1488	-0.6193	0.3685	6.3916	-9.9658	6.1254	3.705	-9.9658	-3.6259	-3.6259	-9.9658	-9.9658	-9.9658	-1.9942	-0.9132	-0.2671	4.686	-3.1714	8.0129	7.4939	5.3187	-0.2159	-1.685	3.5399	3.9194	1.0573	-9.9658	-4.2934	3.0234	-9.9658	-1.7322	-2.3884	3.6793	1.4281	-1.1811	4.2995	9.2305	2.4144	-3.3076	2.0912	-9.9658	-9.9658	-9.9658	-0.6416	1.5661	-9.9658
GBMLGG	TCGA-S9-A7IY-01	2.87975	1.3791	-2.4659	-3.816	-0.4325	4.6747	-2.3147	6.4104	3.5815	-9.9658	-1.2142	-3.816	-9.9658	-5.5735	-9.9658	-0.8084	-2.8262	-2.6349	5.0405	-1.0262	4.2111	7.4243	6.7262	-3.816	-0.9971	3.5547	4.284	1.1184	-0.7588	-4.6082	1.196	-5.5735	-9.9658	-4.6082	5.0666	-0.2159	-3.6259	3.5706	8.3296	3.0757	-5.5735	1.9564	-9.9658	-5.5735	-9.9658	-1.2828	1.4704	-9.9658
GBMLGG	TCGA-P5-A781-01	2.87188	1.4174	-4.6082	-3.1714	-0.5543	4.4027	-2.3884	8.1216	2.7314	-9.9658	-0.013	-3.6259	-9.9658	-9.9658	-9.9658	-1.0262	-5.0116	-2.8262	3.8531	0.2154	3.9223	6.9807	4.9026	-1.8836	-2.6349	3.6451	2.9674	0.2762	-1.3548	-9.9658	1.8282	-4.6082	-3.816	-3.6259	5.8605	-0.1665	-3.1714	3.1491	8.8775	1.6512	-9.9658	1.9786	-9.9658	-5.5735	-9.9658	-1.8836	0.6699	-9.9658
GBMLGG	TCGA-TM-A84G-01	4.18424	2.167	-3.816	-6.5064	-1.685	5.1587	-3.816	5.8314	0.8726	-9.9658	-2.9324	-3.3076	-2.2447	-9.9658	-9.9658	-1.2142	-5.0116	-5.0116	3.162	-1.4699	4.4384	6.8888	4.2181	-1.5951	-4.6082	4.2899	4.6966	-1.3921	-0.5543	-4.035	1.0642	-9.9658	-3.0469	-9.9658	5.8112	-0.9406	-2.4659	2.9413	8.7743	2.1606	-9.9658	-1.1488	-9.9658	-9.9658	-9.9658	-4.035	-0.1665	-9.9658
GBMLGG	TCGA-HW-A5KK-01	3.04441	0.7146	-3.0469	-1.1488	1.2992	5.6496	-2.2447	5.1273	5.3212	-3.6259	0.5069	-9.9658	-9.9658	-9.9658	-9.9658	0.7916	-0.4719	-1.2142	5.849	-1.8836	4.6335	7.7321	6.7703	-2.4659	0.8883	3.9992	4.4443	2.8641	0.2522	-3.458	2.7336	-0.9406	-4.6082	-2.6349	5.3541	-0.1828	-2.0529	4.1692	8.1631	4.6118	-3.458	4.0696	-9.9658	-3.1714	-5.5735	1.9226	5.7745	-9.9658
GBMLGG	TCGA-E1-5311-01	3.30593	1.7053	-1.685	-3.1714	-0.7346	3.5621	-3.458	5.9951	2.1862	-9.9658	-3.816	-3.6259	-9.9658	-9.9658	-9.9658	-2.3147	-3.458	-4.6082	3.9478	-3.816	4.5952	6.7294	6.0758	-3.816	-2.0529	3.3435	3.5851	-0.7588	-1.2481	-6.5064	0.5069	-5.0116	-4.035	-5.5735	5.4367	-4.6082	-3.816	3.4264	8.4924	1.0222	-5.5735	0.2277	-9.9658	-9.9658	-5.5735	-2.7274	2.0535	-9.9658
GBMLGG	TCGA-FG-7634-01	3.87084	1.5563	-3.3076	-3.1714	-0.3566	5.8089	-2.7274	7.4175	4.7624	-0.1993	0.5271	-5.5735	-9.9658	-9.9658	-9.9658	-0.0725	-1.2142	-0.9971	4.858	-1.9379	6.4567	6.9474	5.7586	-2.2447	0.044	4.4881	5.1445	2.2299	-0.2671	-2.4659	3.1294	-1.3548	-3.3076	-1.8314	6.0815	1.334	0.4552	5.1019	8.8542	4.1294	-3.458	2.1213	-9.9658	-9.9658	-9.9658	-0.5543	3.4424	-9.9658
GBMLGG	TCGA-DU-5855-01	2.38957	1.4281	-2.5479	-1.8314	0.4447	5.6384	-1.0262	5.7241	4.2773	-3.3076	0.4016	-2.114	-9.9658	-9.9658	-9.9658	-0.9406	-2.9324	-3.816	5.4142	-3.1714	4.1094	7.3211	7.0812	-1.7322	-0.7834	3.9185	4.0454	1.0293	-1.3921	-6.5064	2.128	-3.816	-3.458	-4.6082	6.4611	-1.2828	-5.0116	3.637	8.8088	3.0757	-4.035	1.4281	-9.9658	-9.9658	-9.9658	0.8805	6.3867	-9.9658
GBMLGG	TCGA-DU-6396-01	2.45941	1.683	-1.4699	-2.1779	0.3573	6.0359	-0.2671	7.1309	5.7244	-0.2845	1.105	-2.7274	-9.9658	-3.1714	-1.3921	0.9716	-1.3548	0.4447	5.9376	-1.4699	5.1756	6.7486	7.6446	-2.8262	2.3953	5.6407	5.9206	2.8178	0.679	-1.6394	2.4225	-2.3147	-4.035	0.2277	5.9258	4.1294	0.2881	4.3896	8.4903	2.8622	-2.7274	3.87	-5.0116	-9.9658	-9.9658	-1.1488	3.8105	-9.9658
GBMLGG	TCGA-19-4065-01	3.51603	-0.3022	-3.1714	-2.2447	3.0927	7.0454	-2.7274	4.3364	5.2972	-0.0425	1.5514	-3.816	-2.5479	-5.5735	-9.9658	0.0718	-2.114	0.5859	5.1478	-1.4305	8.77	6.6822	5.0837	-2.3884	1.6187	4.1796	5.4182	3.3591	0.5568	-0.5543	3.1377	-3.0469	1.1512	0.2522	3.4129	4.9477	1.4174	4.4739	8.2219	4.9194	-3.1714	1.614	-9.9658	-5.0116	-5.5735	0.8408	3.9856	-4.035
GBMLGG	TCGA-FG-7643-01	3.0738	1.2147	-1.0862	-9.9658	1.6187	4.5485	-2.7274	6.344	2.8916	-3.816	-5.0116	-2.4659	-9.9658	-4.035	-5.5735	-1.5522	-5.0116	-2.8262	3.8033	-1.1488	4.3075	6.8333	5.9926	-4.035	0.099	3.3235	3.623	1.5514	-1.6394	-4.035	1.5514	-5.0116	-9.9658	-4.6082	5.8893	-0.4921	-0.9686	3.2481	8.4247	1.7009	-9.9658	3.4344	-9.9658	-9.9658	-9.9658	-2.0529	0.7493	-9.9658
GBMLGG	TCGA-TM-A84C-01	2.82375	1.0007	-5.5735	-4.035	1.0983	6.7946	-2.9324	4.8002	3.9365	-4.2934	-0.6643	-3.0469	-4.2934	-5.5735	-9.9658	0.044	-2.9324	-2.114	4.0952	-3.0469	5.7412	7.1154	5.5874	-5.0116	-1.0262	3.773	3.3619	0.5568	-1.2828	-3.458	1.3679	-4.035	-4.035	-2.2447	4.9463	1.8879	-3.1714	3.4635	8.9136	0.7146	-6.5064	0.9493	-9.9658	-9.9658	-9.9658	-0.2845	3.7898	-9.9658
GBMLGG	TCGA-02-2485-01	3.73012	1.787	-3.0469	-1.7322	1.2147	6.9086	0.1648	7.3437	3.6393	0.7832	-0.0725	-1.9942	-9.9658	-3.816	-4.2934	1.736	-0.0725	0.058	4.6894	-2.0529	6.8089	6.8065	4.9874	-2.1779	1.3956	4.7203	5.6971	3.417	-0.4719	-2.5479	2.299	-2.1779	-1.9379	0.0158	4.3958	6.3282	2.2633	3.8983	9.0565	3.6184	-1.3183	0.5568	-9.9658	-9.9658	-2.7274	-1.0559	3.7248	-3.6259
GBMLGG	TCGA-WY-A85E-01	2.98368	1.196	-3.458	-3.816	-1.6394	4.6358	-2.3884	6.9639	2.3193	-5.5735	-5.0116	-0.7834	-3.458	-5.5735	-9.9658	0.4016	-3.816	-3.1714	4.3674	-2.3884	2.8582	6.9909	4.6399	0.1519	-2.3884	3.9599	4.079	-0.2159	-0.9971	-5.5735	0.6699	-5.0116	-5.0116	-9.9658	5.4848	0.7058	-1.2481	3.0038	9.0321	1.6045	-6.5064	0.7321	-9.9658	-9.9658	-9.9658	-1.1488	2.3508	-9.9658
GBMLGG	TCGA-12-1597-01	3.7377	0.5859	-9.9658	-3.458	-1.4305	5.6488	-2.114	4.8822	3.8788	-4.035	0.4552	-5.5735	-9.9658	-9.9658	-5.5735	-2.3147	-2.114	-2.4659	4.3944	-6.5064	7.6994	7.1899	6.0798	-2.3147	-1.0862	3.3647	3.5851	0.5666	-1.7809	-4.2934	1.736	-4.035	-2.5479	-2.7274	3.8915	1.4756	-1.5522	3.4384	8.3115	1.7744	-6.5064	1.7097	-9.9658	-9.9658	-9.9658	-3.6259	-0.013	-9.9658
GBMLGG	TCGA-28-1747-01	4.1227	0.8568	-2.9324	-1.8836	1.3901	6.5711	-1.8836	7.7325	5.7719	2.8799	-1.8836	-4.2934	-9.9658	-9.9658	-9.9658	1.2455	-1.2481	0.5271	5.6097	-2.3884	4.6525	7.539	5.9203	-3.0469	1.9034	5.0955	4.9369	3.5827	0.1519	-2.3884	2.7139	-1.4305	-0.9132	-0.4131	4.4829	6.4216	2.2723	4.7893	9.1109	2.8096	-3.3076	2.0076	-9.9658	-9.9658	-9.9658	-0.3566	2.5462	-9.9658
GBMLGG	TCGA-28-2499-01	2.76126	1.2875	-3.816	0.0158	2.2452	5.9839	-2.5479	4.9463	3.8847	-0.1504	-1.1172	-3.816	-9.9658	-9.9658	-9.9658	-0.2845	-0.8863	-1.3921	4.7236	-2.0529	8.1464	7.6302	5.8128	-5.0116	0.7407	5.7498	6.2424	2.3135	-0.8339	-3.816	2.828	-4.6082	-1.5105	-0.8339	4.5392	4.2601	-0.1504	3.8249	7.7055	4.0207	-5.5735	-0.0574	-9.9658	-9.9658	-9.9658	-2.4659	1.949	-9.9658
GBMLGG	TCGA-DU-7298-01	3.98183	1.2696	-2.9324	-3.6259	0.24	5.4383	-3.6259	5.9345	4.5192	-3.816	-0.2845	-3.458	-9.9658	-4.035	-5.5735	-1.0262	-3.816	-2.8262	4.2825	-5.0116	5.3975	6.8829	6.0993	-3.6259	-2.3884	3.928	4.5946	-0.0877	-0.9686	-4.2934	1.7828	-5.0116	-4.035	-4.6082	4.865	-1.1172	-2.4659	4.2721	9.1278	2.1988	-5.5735	2.4252	-5.0116	-9.9658	-9.9658	-1.4699	3.2572	-9.9658
GBMLGG	TCGA-TM-A84T-01	2.3618	2.0946	-9.9658	-1.8836	-0.8084	4.951	-3.458	7.2332	3.6207	-5.5735	-1.5522	-3.3076	-3.1714	-9.9658	-9.9658	-0.3383	-4.6082	-5.5735	4.9146	-2.7274	4.6531	6.8406	5.983	-2.9324	-1.3183	3.154	3.492	0.058	-1.2142	-4.2934	2.0979	-9.9658	-9.9658	-1.9379	5.7328	-2.4659	-3.1714	3.8095	8.7747	1.2934	-5.0116	0.9493	-9.9658	-5.0116	-9.9658	-1.3183	-0.0725	-9.9658
GBMLGG	TCGA-FG-7637-01	3.11769	1.5854	-9.9658	-1.3921	-2.4659	5.0644	-1.685	6.8976	1.4859	-2.9324	-5.0116	-5.5735	-9.9658	-9.9658	-9.9658	-2.1779	-3.6259	-3.6259	3.0305	-0.6193	3.3787	6.4072	5.7203	-0.4521	-1.4699	3.652	3.1475	0.5763	-0.013	-2.7274	0.9716	-5.0116	-9.9658	-5.5735	5.2533	-3.0469	-2.4659	3.2707	9.223	1.0079	-6.5064	-0.8599	-9.9658	-9.9658	-9.9658	-5.5735	0.3796	-9.9658
GBMLGG	TCGA-HT-A5R9-01	3.61703	2.0535	-2.9324	-4.035	-2.1779	4.8258	-2.6349	4.7274	0.9716	-9.9658	-4.2934	-3.0469	-9.9658	-3.458	-9.9658	0.0014	-3.3076	-2.114	2.6185	-3.458	4.0833	6.4557	4.5305	-1.7322	0.4447	2.9857	3.0163	1.4494	0.0854	-1.5105	-0.0574	-5.0116	-9.9658	-9.9658	4.8987	-1.8836	-4.035	2.5996	8.4487	2.2543	-4.2934	-0.9686	-9.9658	-9.9658	-9.9658	-6.5064	0.1903	-9.9658
GBMLGG	TCGA-HT-A614-01	2.78031	1.9264	-9.9658	-2.6349	0.0158	5.5123	-1.7809	7.9485	3.7961	-2.0529	-2.3147	-2.114	-9.9658	-9.9658	-9.9658	1.5854	-5.5735	-3.0469	4.5934	-3.0469	3.0723	7.1599	5.714	0.2642	-4.2934	3.6184	3.3521	-0.2671	1.0711	-4.6082	0.9419	-5.5735	-4.2934	-3.0469	6.093	-1.3183	-2.8262	3.66	9.0968	1.3735	-5.0116	2.7117	-3.3076	-9.9658	-9.9658	-1.3183	0.4447	-9.9658
GBMLGG	TCGA-06-0649-01	3.13586	0.9568	-2.3147	-0.9132	-0.5973	5.4614	-0.4521	5.8785	5.0687	-0.8339	1.6964	-3.0469	-2.0529	-3.816	-5.5735	0.537	-0.7588	0.2998	5.4317	-0.9132	6.1583	7.0411	6.513	-3.1714	2.2452	4.2281	5.2342	2.8779	1.1897	-0.9971	2.9875	-1.7322	1.7995	-2.114	4.9883	2.4544	-0.013	4.041	7.9533	3.795	-2.2447	1.6695	-9.9658	-9.9658	-9.9658	0.4016	2.7139	-9.9658
GBMLGG	TCGA-QH-A65R-01	3.23269	1.6374	-4.035	-6.5064	-1.6394	4.6282	-3.6259	5.3162	1.105	-3.816	-3.816	-5.0116	-9.9658	-9.9658	-9.9658	-0.0574	-1.4699	-2.2447	3.0056	-3.6259	4.5448	6.7638	5.0943	-1.5522	-5.0116	2.5363	2.93	-0.6873	-1.1811	-4.2934	0.2029	-6.5064	-5.0116	-3.1714	5.8455	-2.114	-3.0469	2.9581	8.2703	3.6289	-6.5064	0.1776	-9.9658	-9.9658	-9.9658	-3.1714	2.8361	-9.9658
GBMLGG	TCGA-FG-A60J-01	3.2555	1.2934	-2.6349	-4.6082	0.1388	5.0339	-1.8836	7.2514	3.668	-1.0262	-2.7274	-3.0469	-9.9658	-9.9658	-9.9658	-0.7108	-1.0262	-1.5522	4.9887	-1.5951	2.945	7.2523	6.6424	-1.1488	-0.1665	3.9051	4.479	1.5216	0.1776	-2.2447	2.0111	-4.2934	-3.0469	-1.8314	6.3392	-0.3201	-1.5105	3.1062	7.9818	2.2723	-5.0116	1.3167	-9.9658	-9.9658	-9.9658	-1.1172	3.1733	-9.9658
GBMLGG	TCGA-FG-8189-01	3.06871	1.9712	-0.7834	-5.5735	0.1124	3.6983	-3.816	5.4145	1.3901	-0.9971	-9.9658	-3.0469	-9.9658	-9.9658	-9.9658	-2.1779	-4.2934	-5.0116	2.5137	-3.6259	4.4797	6.1827	5.3005	-2.0529	-3.3076	2.5061	2.2753	-1.5522	-2.4659	-5.5735	1.5514	-5.5735	-1.2142	-9.9658	7.0834	-1.1488	-4.2934	2.5213	7.9515	0.2881	-6.5064	1.6327	-9.9658	-9.9658	-9.9658	-1.5951	0.9716	-9.9658
GBMLGG	TCGA-P5-A5EY-01	2.85196	1.5661	-2.3147	-5.0116	-0.1665	4.5748	-2.1779	6.3625	2.4623	-3.6259	-1.0262	-5.5735	-9.9658	-9.9658	-5.5735	-1.2828	-2.6349	-1.4699	3.4687	-3.0469	4.0091	7.6351	6.2077	-2.5479	1.3454	3.831	2.9071	2.9729	-0.6193	-4.6082	3.0463	-5.0116	-9.9658	-5.5735	5.0175	-0.2671	-1.8836	3.136	8.1005	1.8201	-6.5064	0.2642	-3.6259	-9.9658	-3.3076	-1.3921	0.8726	-9.9658
GBMLGG	TCGA-06-2564-01	4.30597	2.4171	-0.3201	-3.6259	2.5188	7.0948	-3.458	6.6607	5.6528	-1.5105	1.0983	-3.3076	-2.2447	-9.9658	-9.9658	-0.7346	-1.5522	-0.5125	5.8565	-3.3076	8.4573	7.4441	5.2423	-3.3076	0.2642	4.6583	5.4529	2.3308	-1.0559	-0.9686	2.9637	-3.1714	-1.3921	-1.7322	5.0215	2.6348	-1.8836	5.2877	9.1391	3.8983	-4.035	4.7976	-9.9658	-9.9658	-4.035	1.2875	3.1045	-9.9658
GBMLGG	TCGA-06-5408-01	4.14241	0.8961	-2.1779	-3.6259	1.6512	7.1612	-4.6082	6.0721	3.6983	-1.2828	-0.3752	-4.035	-1.0262	-5.0116	-5.5735	-0.5332	-3.1714	-1.1811	5.0623	-3.6259	9.1438	7.692	5.0242	-4.035	-0.7834	5.2091	5.2487	1.8444	-0.6193	-3.458	2.694	-5.5735	0.7321	-1.1488	5.3653	4.7767	-0.9406	3.4739	9.101	4.7383	-4.6082	1.5661	-2.7274	-9.9658	-9.9658	-0.2671	3.6006	-9.9658
GBMLGG	TCGA-27-1832-01	3.27352	0.4657	-9.9658	-1.2142	1.5165	6.6885	0.5763	3.1669	4.5644	-0.7346	-0.4521	-3.6259	-9.9658	-3.816	-9.9658	0.7233	-0.6873	-0.5543	5.608	-1.5951	7.104	7.4383	6.0257	0.2522	3.3787	3.002	2.7972	3.9947	1.3791	-3.0469	4.235	-2.114	4.4732	-2.2447	3.8769	3.1409	1.3511	3.2707	8.3871	6.1619	-2.5479	0.4552	-9.9658	-9.9658	-3.816	0.2881	3.2959	-3.1714
GBMLGG	TCGA-14-1829-01	2.90113	0.2642	-2.7274	0.7832	0.24	4.6679	-1.5951	4.7448	4.7307	-0.5543	1.4494	-2.8262	-1.1172	-5.5735	-9.9658	-1.1811	-2.1779	0.3346	3.4984	-2.3884	6.3172	6.493	5.5258	-5.0116	2.4225	4.3513	4.0153	1.7617	-0.1031	-1.9942	2.4753	-3.458	0.5069	-2.6349	2.7594	3.7773	-0.6873	4.251	8.5428	2.1047	-2.4659	-1.1488	-9.9658	-9.9658	-5.5735	0.2642	2.2051	-9.9658
GBMLGG	TCGA-32-2615-01	3.19058	1.3623	-2.4659	-3.458	2.4544	6.8987	-1.1172	4.8929	4.4667	-0.5125	0.0158	-2.4659	-1.2142	-9.9658	-4.6082	0.6332	-0.5332	-0.4921	5.5308	-0.7834	9.8404	7.1157	6.1439	-4.2934	2.0395	5.5012	6.1817	3.0927	0.7916	-1.8314	2.7401	-2.8262	3.2189	-0.5543	6.9767	5.1173	1.595	3.8571	8.6108	6.0288	-2.114	2.6418	-4.6082	-9.9658	-3.816	-0.2671	4.1078	-9.9658
GBMLGG	TCGA-06-0158-01	4.08747	1.6512	-0.2845	-3.458	1.4065	6.8612	-1.4699	6.3688	5.2072	-1.1172	1.125	-2.6349	-1.4699	-9.9658	-5.5735	-0.2159	-0.1187	-0.5973	6.4207	-1.6394	8.7698	7.3162	5.9155	-9.9658	0.5859	4.6288	4.9505	2.3981	-0.1031	-2.4659	3.2929	-1.9942	-0.4521	-0.7108	6.2948	3.4331	0.3573	4.8304	8.1681	5.1182	-3.0469	2.4279	-9.9658	-9.9658	-9.9658	1.1706	4.4115	-9.9658
GBMLGG	TCGA-HT-7882-01	2.75487	2.036	-4.6082	-1.2142	2.4908	7.1543	-1.2828	3.3105	6.0275	-0.1187	3.9478	-2.4659	-3.0469	-3.6259	-4.2934	0.4967	2.2144	1.4388	6.142	0.3685	7.4907	6.5393	4.9313	-4.035	3.5349	4.1061	4.7991	4.8172	1.3167	2.5536	3.8033	0.1776	1.7954	0.346	5.6634	4.5522	1.6785	5.0405	8.2048	7.4153	-0.5125	2.6715	-9.9658	-9.9658	-3.3076	0.4657	5.6602	-9.9658
GBMLGG	TCGA-06-2558-01	4.04093	2.5437	-1.9942	-2.1779	0.3115	5.6605	-1.5522	5.6308	4.5681	-3.816	0.688	-3.6259	-9.9658	-3.458	-9.9658	-0.4921	-3.0469	0.1388	5.2188	-2.6349	8.3431	6.9491	5.6465	-0.7346	1.5514	4.6352	4.7088	2.0535	-1.4699	-1.3183	3.5149	-3.3076	-3.458	-2.6349	4.6077	1.125	-2.1779	5.2567	8.5693	2.8562	-4.6082	2.5561	-9.9658	-9.9658	-4.035	0.4865	3.9356	-9.9658
GBMLGG	TCGA-HT-8011-01	4.70649	1.9264	-3.458	-5.5735	-0.2159	6.5755	-1.1172	4.7334	3.5274	-2.9324	-1.9942	-2.2447	-1.1172	-4.2934	-5.0116	0.4865	-1.4699	-0.9132	4.3744	-1.7809	5.7554	7.5844	5.176	-3.458	0.3115	3.8511	4.6277	1.3623	-1.2142	-4.2934	2.4412	-4.2934	-5.0116	-1.8314	4.9472	1.2085	-1.1811	4.2274	9.7743	2.5188	-3.6259	1.2209	-4.6082	-9.9658	-5.5735	-2.4659	0.0854	-9.9658
GBMLGG	TCGA-DU-6394-01	3.67352	1.4011	-3.6259	-3.458	1.4547	6.1787	-9.9658	5.3875	2.4252	2.0569	-0.9132	-4.2934	-9.9658	-9.9658	-9.9658	-0.3566	-3.3076	-3.3076	4.1011	-3.6259	6.3408	6.9071	4.6611	-2.2447	-2.7274	4.373	5.2392	-0.7588	-0.7588	-6.5064	1.1512	-6.5064	0.0718	-2.7274	5.532	0.9343	-0.0877	3.2435	8.9194	3.2205	-9.9658	-0.0277	-9.9658	-9.9658	-9.9658	-1.0559	1.7617	-5.0116
GBMLGG	TCGA-28-5216-01	3.75168	1.4388	-5.0116	-3.1714	0.03	6.9409	-4.2934	4.834	4.248	-1.1488	0.8164	-3.3076	-0.8084	-9.9658	-9.9658	-1.685	-1.0862	-0.5973	5.0811	-3.458	9.2739	7.2603	5.2936	-0.9971	-0.0725	4.2134	5.55	1.8242	-2.114	-2.1779	2.5804	-4.2934	-1.8836	-1.4305	5.5632	2.2872	-0.5125	3.551	8.2987	3.7486	-9.9658	3.1212	-9.9658	-9.9658	-9.9658	0.4447	4.2088	-4.2934
GBMLGG	TCGA-WY-A859-01	3.26903	2.2482	-1.5522	-5.0116	-0.6416	4.8699	-3.6259	6.7565	2.2573	-9.9658	-9.9658	1.8242	-9.9658	-9.9658	-9.9658	-0.5543	-4.2934	-5.5735	3.9992	-2.9324	4.8798	7.1245	5.8543	-1.1488	-9.9658	2.9802	3.0498	-2.4659	-0.9686	-9.9658	1.0079	-9.9658	-5.0116	-5.5735	6.4385	-2.9324	-3.6259	3.0217	8.5304	-0.1345	-9.9658	1.3397	-4.035	-4.2934	-9.9658	-2.114	3.716	-9.9658
GBMLGG	TCGA-WY-A85B-01	2.95602	1.8604	-4.2934	-0.6873	-0.8084	5.6008	-2.9324	6.7432	4.4047	-2.2447	-0.7834	-2.6349	-9.9658	-9.9658	-9.9658	0.1776	-3.0469	-1.4305	5.2126	-5.0116	4.0233	7.2953	6.1565	-0.8339	-0.8863	3.8896	4.4304	1.1512	-1.1488	-2.3884	2.1734	-3.816	-9.9658	-5.0116	5.0527	-0.9686	-2.2447	3.7226	8.9915	2.4198	-9.9658	1.2271	-9.9658	-9.9658	-5.5735	-2.2447	0.8408	-9.9658
GBMLGG	TCGA-S9-A6UB-01	3.66339	1.2636	-2.2447	-5.5735	-1.3548	5.2095	-3.458	5.8701	2.233	-9.9658	-2.8262	-3.3076	-9.9658	-9.9658	-9.9658	-0.3752	-9.9658	-5.0116	3.3407	-1.0862	4.2134	6.6858	4.6083	-1.8836	-1.8314	4.7285	3.5449	-1.0862	-0.4921	-9.9658	0.9789	-5.5735	-9.9658	-9.9658	5.6679	-1.8836	-2.9324	3.1112	8.9225	-0.0574	-6.5064	1.4065	-9.9658	-9.9658	-9.9658	-5.0116	-1.8836	-9.9658
GBMLGG	TCGA-28-5207-01	3.57776	2.5163	-1.1488	-0.8863	0.6608	5.72	-0.8339	6.3745	4.6306	-2.7274	-0.8084	-9.9658	-9.9658	-3.1714	-4.035	-1.1488	-2.114	-0.4719	5.018	0.1776	6.8491	6.3782	7.093	-2.9324	1.334	4.2781	4.9463	2.8402	0.4552	-2.5479	3.2127	-4.2934	0.03	-2.8262	5.5488	2.5112	1.8564	4.7919	9.2504	2.5011	-2.3147	1.2455	-9.9658	-9.9658	-9.9658	-1.4305	2.8402	-9.9658
GBMLGG	TCGA-S9-A6U6-01	3.50462	1.7273	-3.1714	-2.2447	0.058	5.5274	-2.7274	6.613	3.7182	-3.3076	-3.0469	-2.4659	-9.9658	-9.9658	-9.9658	-0.2159	0.099	-6.5064	5.3345	-6.5064	4.9718	7.3996	5.9407	-1.2142	-4.6082	3.3521	3.1162	-0.1993	-2.0529	-4.6082	0.9789	-5.5735	-3.816	-4.6082	5.5525	-0.2845	-2.1779	3.6006	8.7442	3.2496	-9.9658	1.0983	-4.2934	-9.9658	-9.9658	-0.7588	4.9454	-9.9658
GBMLGG	TCGA-DU-8168-01	4.49957	1.7316	-3.458	-4.6082	0.1388	5.5179	-3.3076	3.8491	1.0915	-5.5735	-1.2828	-2.5479	-9.9658	-5.0116	-5.0116	1.6695	-5.0116	0.8082	2.296	-4.2934	5.3875	6.5116	4.9486	0.5069	-1.6394	5.4148	4.3972	-0.5973	-1.1488	-5.0116	0.5271	-6.5064	-5.0116	-2.3884	5.8327	0.3907	-1.4699	3.506	9.4263	2.1509	-6.5064	0.0014	-9.9658	-9.9658	-5.5735	-3.458	2.1509	-9.9658
GBMLGG	TCGA-41-2572-01	3.43293	1.9415	-2.114	-1.3921	1.8363	6.6952	-2.4659	5.9411	3.7667	3.8925	-0.4719	-3.1714	-1.1811	-9.9658	-9.9658	-0.0574	-3.6259	-3.0469	5.6528	-1.1811	8.1643	7.9309	5.1235	-5.5735	0.517	4.7132	2.5658	2.5828	0.5859	-2.9324	2.6715	-4.6082	-2.2447	-3.1714	4.839	6.5823	0.2154	3.9041	8.503	4.4621	-4.6082	1.2333	-9.9658	-9.9658	-9.9658	-1.7322	1.7316	-9.9658
GBMLGG	TCGA-06-0130-01	3.23726	1.4704	-9.9658	-0.1665	3.402	7.7881	0.6332	2.004	5.8622	3.5349	2.8055	-5.5735	-9.9658	-9.9658	-2.2447	3.3787	0.5568	3.8769	7.4678	1.5563	5.4585	7.4649	6.2317	-0.2328	4.9313	5.2634	5.993	5.599	3.5839	0.3346	4.9482	-0.5332	5.4148	0.5763	3.3633	7.7361	6.4524	4.9108	7.8281	5.8463	0.4447	2.651	-9.9658	-9.9658	0.03	0.3685	4.613	-2.7274
GBMLGG	TCGA-DU-7290-01	3.2126	0.2998	-0.2498	0.4125	1.3397	6.3191	0.4552	4.7971	5.6622	-2.1779	1.412	-5.5735	-1.2481	-9.9658	-9.9658	-0.3022	-0.5973	-0.8599	5.4938	-0.5332	4.1836	6.6289	6.6082	-6.5064	2.5363	3.5009	5.1651	3.7378	-0.2845	-1.2481	2.376	-1.9942	-0.8339	-0.2671	5.1981	3.0199	-0.6643	4.5129	8.2008	4.9151	-2.0529	3.5572	-9.9658	-4.2934	-4.2934	3.3435	5.9887	-9.9658
GBMLGG	TCGA-06-5416-01	4.0152	1.9527	-5.0116	-1.5105	-0.0425	6.0104	-1.8314	3.637	1.6512	-1.3921	-0.7346	-1.6394	-9.9658	-9.9658	-9.9658	1.1706	-1.9942	-0.9406	4.2533	-2.3147	7.2948	6.8789	3.3993	-1.9379	-0.2498	4.1343	4.1425	1.8762	-0.4325	-4.035	3.2049	-4.2934	1.2394	-2.8262	3.7783	2.2019	0.346	3.0944	8.2435	1.177	-3.816	-0.4131	-9.9658	-9.9658	-3.0469	-2.3884	1.6512	-9.9658
GBMLGG	TCGA-06-0168-01	3.9588	1.4228	-2.3147	-1.5951	0.8164	6.5223	-0.8084	5.0951	5.109	0.517	1.1382	-2.2447	-0.1828	-1.8836	-9.9658	0.1903	-1.0862	-0.2671	5.9656	-0.6416	6.4301	7.4879	6.4041	-9.9658	1.8242	3.6428	5.0807	3.0181	-0.4521	-4.035	3.453	-9.9658	0.4657	-1.2142	4.8895	4.8485	1.0847	4.2571	7.64	4.9098	-9.9658	2.7029	-9.9658	-9.9658	-9.9658	0.2522	3.309	-9.9658
GBMLGG	TCGA-DU-6407-01	3.65767	1.1447	-4.2934	-9.9658	-0.8339	5.3709	-9.9658	8.0795	3.7302	-9.9658	-1.0559	-4.6082	-9.9658	-9.9658	-9.9658	-1.5522	-4.6082	-3.458	4.7613	-3.6259	3.7443	6.9597	6.5151	-0.5125	-5.0116	2.7465	3.9079	-1.5951	-3.0469	-3.458	1.2333	-9.9658	-4.6082	-9.9658	5.8704	-2.1779	-3.6259	3.5754	8.7655	1.8879	-9.9658	-0.4521	-9.9658	-9.9658	-9.9658	-2.7274	2.0742	-9.9658
GBMLGG	TCGA-02-0055-01	2.51851	0.4657	-1.2142	-0.9406	4.764	7.1911	-0.6873	3.3076	4.8665	0.7832	3.3061	-3.0469	-9.9658	-9.9658	-4.035	0.0718	-0.5756	-0.5332	6.3333	-0.7588	7.7861	7.4088	5.8174	-2.7274	2.8178	4.5104	5.2196	3.637	0.2642	-2.2447	4.8837	-3.816	6.3528	0.1388	4.7099	3.9728	0.5763	3.4765	7.6603	5.9519	-3.1714	1.0007	-9.9658	-9.9658	-4.2934	0.24	4.1302	-9.9658
GBMLGG	TCGA-HT-7601-01	3.211	1.0079	-2.3884	-0.9406	0.5568	5.844	-0.9686	7.9613	5.5056	0.099	-0.2498	-2.0529	-9.9658	-9.9658	-4.6082	-0.1187	-1.3548	0.3796	4.8615	-0.7834	3.5149	6.7207	7.2817	-2.4659	2.1509	5.1651	6.2722	3.5559	0.6332	-1.8314	3.2692	-2.4659	-1.685	-0.6643	6.4118	3.1829	2.7951	4.4634	8.6092	3.5436	-1.7809	3.162	-9.9658	-9.9658	-2.3884	-1.685	1.9749	-9.9658
GBMLGG	TCGA-DU-6403-01	4.73554	2.3536	-1.9942	-4.2934	-0.1187	5.911	-4.035	5.3516	5.1799	-0.2159	-0.9971	-3.458	-2.2447	-5.5735	-9.9658	-0.6643	-1.1172	-1.4305	5.1811	-2.2447	3.8136	7.2059	5.5763	-0.9686	-0.8084	4.3986	4.5497	1.787	-1.9942	-4.2934	2.5036	-2.6349	-1.2481	-2.2447	5.7068	3.5523	1.2815	3.7898	9.3267	2.2113	-3.816	4.0251	-9.9658	-9.9658	-9.9658	-0.9406	1.3225	-9.9658
GBMLGG	TCGA-06-5415-01	3.99551	1.4962	-4.6082	-3.0469	0.7407	6.2231	-2.114	6.7118	3.5669	-0.1993	-0.4719	-4.035	-2.5479	-6.5064	-6.5064	-0.0877	-1.0262	-0.5332	4.8269	-1.7322	6.0251	7.2791	5.3288	-3.3076	2.2452	4.6725	4.9991	3.3828	0.0854	-1.3921	2.4934	-5.0116	-1.7322	-1.5105	4.8279	3.794	0.7493	3.97	9.1594	3.154	-2.4659	2.5561	-9.9658	-9.9658	-5.5735	-0.394	1.8201	-9.9658
GBMLGG	TCGA-DB-A64R-01	2.96536	1.934	-3.458	-5.5735	-1.685	5.0734	-4.6082	6.1305	2.3135	-9.9658	-5.0116	-1.3183	-9.9658	-9.9658	-9.9658	-0.2498	-2.9324	-5.5735	4.0645	-2.9324	4.4569	6.8641	5.1359	-2.114	-4.2934	4.3709	4.0567	-1.9942	-1.1172	-5.5735	0.2762	-4.2934	-9.9658	-2.8262	5.5245	-4.6082	-3.3076	3.2112	8.875	1.1641	-9.9658	1.125	-9.9658	-9.9658	-9.9658	-2.7274	1.8036	-9.9658
GBMLGG	TCGA-E1-A7YQ-01	3.34203	2.167	-2.1779	-2.7274	1.8363	5.7926	-0.2328	4.2335	5.1811	1.1382	-0.0425	-2.1779	-9.9658	-2.7274	-2.3884	0.8408	-0.3201	-0.7108	6.0811	-1.2828	7.6867	7.4947	6.8989	-4.2934	2.2051	4.7619	5.4148	2.9802	0.1257	-2.8262	4.677	-1.6394	-3.1714	-0.2845	4.4608	5.2211	3.074	4.5473	8.0969	2.9984	-3.816	2.4465	-9.9658	-9.9658	-9.9658	-0.7834	3.6635	-9.9658
GBMLGG	TCGA-DU-6405-01	4.19142	1.3109	-9.9658	-3.3076	2.0183	6.8511	-6.5064	8.2803	4.0322	-3.458	-0.6193	-4.035	-4.035	-9.9658	-5.5735	-1.685	-3.3076	-1.3183	4.951	-3.816	5.1918	7.594	5.6174	-4.2934	-0.7346	5.2327	5.9177	0.7146	-0.4921	-3.1714	1.5563	-2.4659	-4.6082	-2.4659	5.9091	1.4494	-0.4131	3.9299	9.4567	4.3965	-5.5735	1.0503	-9.9658	-9.9658	-9.9658	0.5666	4.3242	-9.9658
GBMLGG	TCGA-HW-7487-01	2.66903	1.4011	-2.0529	-9.9658	-0.013	4.0055	-2.3884	5.6424	2.2391	-5.5735	-1.4699	-2.5479	-9.9658	-9.9658	-9.9658	-0.8863	-5.5735	-3.6259	2.9655	-2.3884	5.0896	6.8806	5.9848	-6.5064	-3.0469	3.6838	3.4477	-1.1172	-1.9942	-4.6082	1.1577	-6.5064	-9.9658	-9.9658	5.4793	-0.7588	-2.3147	2.8779	8.5737	1.4859	-6.5064	1.8282	-9.9658	-5.5735	-9.9658	-1.8314	2.2573	-9.9658
GBMLGG	TCGA-S9-A7R2-01	2.70925	0.6517	0.0014	0.1388	0.8082	4.691	-0.3201	5.0484	5.0291	-3.1714	-0.8863	-5.5735	-9.9658	-9.9658	-9.9658	-0.013	-1.9379	-0.9132	5.4125	-0.3383	1.9931	7.3287	6.6841	-3.1714	2.1988	3.4358	4.5336	4.182	0.537	-3.1714	2.2872	-2.3147	-4.6082	-5.0116	4.2877	1.3846	-0.3566	3.9147	8.4655	3.4661	-3.6259	3.0428	-9.9658	-5.0116	-9.9658	-0.3383	1.0433	-3.816
GBMLGG	TCGA-S9-A7J1-01	3.25998	1.3397	-9.9658	-3.458	0.3231	4.9727	-2.7274	7.9171	3.1813	-0.7834	-2.0529	-9.9658	-9.9658	-9.9658	-9.9658	-0.8084	-4.2934	-0.5973	4.6399	0.24	4.6977	7.2841	5.5832	-3.0469	-2.0529	4.8783	5.2612	0.2762	-0.5973	-1.2828	1.3956	-4.6082	-3.458	-2.7274	4.9454	0.6969	-1.4305	3.5535	8.9127	1.8918	-4.035	1.7009	-4.2934	-9.9658	-9.9658	-2.6349	-0.5543	-9.9658
GBMLGG	TCGA-P5-A72X-01	2.53851	3.0446	-3.3076	-2.5479	-0.5125	4.7033	-2.7274	7.9415	2.167	-9.9658	-1.3921	-4.035	-9.9658	-9.9658	-5.0116	-1.3921	-2.7274	-3.1714	4.7798	-1.5522	4.7976	7.4435	6.1079	-2.1779	-0.1345	3.5009	4.1652	1.8119	-1.4699	-4.2934	1.5854	-2.9324	-9.9658	-4.2934	6.3825	-0.8339	-1.9942	3.5742	8.6891	2.5683	-5.5735	0.605	-9.9658	-9.9658	-4.2934	-1.4699	3.8075	-9.9658
GBMLGG	TCGA-E1-A7YJ-01	3.585	2.0218	-1.5951	-1.4305	1.1706	5.9605	-1.1172	6.4688	4.6124	1.1833	-0.1665	-0.4521	-4.2934	-9.9658	-9.9658	0.2029	0.3115	-1.2481	6.1948	-1.8836	6.609	7.3362	6.2157	-3.816	0.6969	5.082	5.7493	2.8799	0.5955	-4.035	2.167	-4.035	-1.8314	-0.4719	5.6059	5.7277	1.9415	3.0515	8.9209	4.8768	-2.0529	2.6418	-9.9658	-9.9658	-5.5735	-2.5479	0.1519	-9.9658
GBMLGG	TCGA-06-5411-01	3.65537	0.7233	-0.5332	-3.1714	0.7999	6.1719	-2.3884	4.5173	4.8773	-3.3076	0.4552	-3.3076	-9.9658	-9.9658	-9.9658	0.4761	-2.114	-0.8863	4.5098	-4.035	5.8238	7.0303	5.7145	-2.9324	-0.2328	4.0001	3.9468	2.004	-0.9971	-1.9942	3.2572	-4.035	0.24	-1.4699	5.2817	2.4544	0.5859	4.5497	8.7272	3.4881	-4.035	2.6019	-9.9658	-9.9658	-9.9658	0.1776	2.8341	-2.9324
GBMLGG	TCGA-26-5139-01	3.66449	1.3956	-1.8314	-2.3147	1.6875	6.9795	-2.2447	5.1351	4.7159	-0.4131	0.3796	-5.0116	0.24	-9.9658	-5.0116	-1.8836	-2.9324	-1.1811	4.9426	-1.6394	9.5513	7.1411	5.6329	-4.6082	0.2998	4.1547	5.2983	3.0825	-0.4719	-2.6349	2.9911	-3.3076	-0.2671	-2.4659	6.1418	4.6171	0.0854	4.3807	8.9837	5.9593	-4.2934	1.5514	-9.9658	-9.9658	-9.9658	1.0222	4.2381	-9.9658
GBMLGG	TCGA-HT-7690-01	2.99277	1.7229	-3.3076	-1.2828	-0.2159	5.7921	-1.8836	7.1686	4.5336	2.8402	0.4657	-2.4659	-2.3884	-3.3076	-0.6416	-1.2481	-1.3183	-0.5973	4.9626	-1.8836	3.4143	7.032	6.9167	-3.0469	2.8838	4.7132	5.8961	2.7572	-0.3752	-2.9324	2.8014	-1.3921	-4.035	-3.6259	5.9248	1.5709	0.2029	4.096	9.1341	2.6255	-3.3076	2.3308	-9.9658	-9.9658	-5.5735	-2.114	3.6042	-9.9658
GBMLGG	TCGA-HT-8105-01	2.99277	1.0363	0.3796	-4.6082	0.2642	4.7127	-1.3548	4.6708	2.2931	-3.1714	-2.8262	-2.8262	-9.9658	-4.035	-5.5735	-0.1504	-3.0469	-0.9971	3.0393	-2.9324	4.784	6.2946	5.7512	-1.9379	-1.1172	4.9007	4.5154	0.6517	-0.4921	-2.2447	1.5266	-4.6082	-1.9379	-2.9324	6.1073	-1.7322	-3.3076	2.9984	8.4648	2.8582	-4.035	0.2642	-3.458	-5.5735	-9.9658	-3.0469	2.2268	-9.9658
GBMLGG	TCGA-76-4928-01	3.17314	0.6239	-1.8314	-3.816	3.3047	7.8383	-2.3884	4.3827	4.6854	-1.8314	0.099	-9.9658	-2.5479	-9.9658	-9.9658	-1.685	-2.4659	-1.3921	5.8849	-2.3147	7.8325	7.0066	5.6165	-4.6082	1.0573	3.7571	5.1708	2.3394	-0.1993	-1.5105	2.5924	-4.2934	0.1519	-3.6259	4.3841	0.6145	-1.2142	4.2518	8.5886	4.2773	-3.0469	1.7575	-9.9658	-9.9658	-9.9658	-0.0425	2.6302	-9.9658
GBMLGG	TCGA-06-0644-01	4.03999	1.0711	-9.9658	-3.458	3.242	8.656	-0.7346	5.1052	4.6719	1.0915	0.8488	-9.9658	-3.0469	-9.9658	-9.9658	-0.4325	-0.6643	-0.3022	6.8415	-0.394	7.4625	7.5484	4.9505	-3.3076	2.5511	4.0037	5.0475	3.5022	1.125	-0.7834	4.3002	-1.9379	5.3245	-1.0262	5.6133	3.0145	1.6649	4.1595	7.9833	6.2428	-1.1811	2.3106	-9.9658	-9.9658	-5.0116	0.2762	3.5086	-3.816
GBMLGG	TCGA-E1-A7YY-01	3.20003	1.8762	-0.7108	-6.5064	0.688	4.3972	-3.3076	5.0871	3.0127	-3.816	-0.9686	-1.9942	-9.9658	-9.9658	-9.9658	-1.0262	-4.035	-5.5735	3.9543	-3.0469	4.6023	6.459	5.9248	-2.6349	-3.816	3.2096	4.0295	-1.1488	-0.7588	-5.0116	2.4332	-9.9658	-3.816	-5.5735	6.6689	1.7995	3.2405	2.8522	7.88	2.2931	-9.9658	2.0604	-2.3884	-5.0116	-9.9658	-1.2828	1.8996	-9.9658
GBMLGG	TCGA-HT-A619-01	3.28688	1.6512	-4.035	-1.9942	-2.6349	3.7204	0.5666	4.8615	-0.3752	-3.0469	-4.035	-3.458	-9.9658	-5.5735	-4.6082	0.4125	-5.5735	-2.2447	2.7401	-3.816	5.4333	7.1184	4.4842	-2.4659	-0.1187	3.309	2.9375	1.177	-0.3383	-3.458	1.4911	-9.9658	-4.6082	-5.5735	5.1268	0.2881	0.547	3.0876	8.6756	0.2881	-4.035	-0.5125	-9.9658	-9.9658	-5.0116	-9.9658	-5.5735	-9.9658
GBMLGG	TCGA-DU-6400-01	3.33483	1.6281	-3.6259	-4.2934	-0.3201	4.5723	-3.1714	3.4765	2.5313	-2.1779	-3.1714	-2.6349	-9.9658	-6.5064	-4.6082	-0.9971	-1.3183	-0.5332	3.5274	-2.7274	4.0909	6.9972	4.9407	-2.7274	-0.3201	4.5148	5.3086	1.5563	-0.013	-3.816	0.8327	-3.6259	-2.7274	-5.0116	5.4393	1.105	0.2154	2.9032	8.1854	2.7314	-3.6259	1.3846	-9.9658	-9.9658	-9.9658	-3.816	1.3109	-9.9658
GBMLGG	TCGA-P5-A737-01	3.16514	1.412	-9.9658	-9.9658	-1.2142	4.8345	-4.035	2.8055	2.2082	-3.0469	-1.2828	-2.7274	-9.9658	-9.9658	-9.9658	-0.2159	-4.6082	-5.0116	3.6543	-0.5756	2.4359	6.9131	4.9905	-1.3183	-2.9324	3.2973	3.793	-0.1665	-1.0559	-4.2934	1.1833	-9.9658	-5.0116	-5.0116	4.7399	-2.8262	-2.114	2.676	8.3526	1.105	-9.9658	0.4447	-9.9658	-5.0116	-9.9658	-1.4699	1.2209	-9.9658
GBMLGG	TCGA-14-0871-01	4.2555	1.2455	-3.0469	-9.9658	-0.9971	6.4128	-2.3884	1.1184	-0.0277	-0.4719	-0.6643	-9.9658	-9.9658	-3.1714	-9.9658	0.3115	-1.5951	-1.7809	4.0722	-9.9658	5.532	6.2963	1.9859	-3.816	-2.2447	4.1644	4.1351	0.8082	-1.7809	-1.8836	0.5666	-9.9658	-9.9658	-9.9658	1.9749	2.3164	0.7321	1.7403	8.525	2.7993	-9.9658	-1.9379	-9.9658	-9.9658	-9.9658	-3.6259	1.3735	-9.9658
GBMLGG	TCGA-RY-A83Y-01	3.20788	1.6649	-4.2934	-5.5735	-1.2142	4.7399	-4.2934	5.7132	2.9469	-4.035	-3.6259	-1.8314	-9.9658	-9.9658	-9.9658	1.7273	-0.8599	1.0222	4.6065	-1.8836	3.5911	8.2017	5.2009	-3.458	-1.3921	3.6463	4.5091	1.3454	-0.1031	-4.2934	1.6045	-9.9658	-2.2447	-2.0529	5.6361	-1.1172	-1.7322	3.3336	8.5237	3.2973	-6.5064	0.7832	-9.9658	-9.9658	-5.0116	-9.9658	-0.8863	-9.9658
GBMLGG	TCGA-HT-8564-01	3.21877	2.7139	-3.1714	-2.8262	1.177	5.848	-1.9379	5.1014	4.0799	-1.3921	-1.9942	0.7916	-9.9658	-5.0116	-3.458	0.3231	-0.9686	-1.8314	4.0994	-1.685	5.1891	7.2225	6.8864	-2.8262	1.1897	4.2165	5.0553	2.4035	-0.3566	-4.6082	3.6714	-3.816	-0.9406	-3.816	6.0389	3.4007	0.4967	4.0705	8.3427	1.7744	-3.3076	2.2513	-1.7322	-9.9658	-5.0116	-0.6873	1.8444	-9.9658
GBMLGG	TCGA-HT-7686-01	2.63923	1.3679	-0.4325	-0.7588	0.6425	5.748	-3.0469	7.0502	5.7669	-3.816	-1.0559	-3.3076	-9.9658	-9.9658	-5.0116	-1.1488	-3.1714	-2.114	5.554	-3.458	1.7828	6.6088	7.6241	-1.3183	0.3346	4.5534	4.5503	2.2082	-0.8599	-4.2934	2.651	-5.0116	-5.0116	-1.5951	5.8316	0.3573	-2.3147	4.573	8.8677	3.3364	-6.5064	3.242	-9.9658	-9.9658	-9.9658	-1.1488	2.2753	-9.9658
GBMLGG	TCGA-E1-A7YM-01	3.48411	0.8568	-1.9942	-1.7322	-0.4719	4.4216	-2.3147	5.1623	3.1245	-4.2934	-5.5735	-3.1714	-9.9658	-9.9658	-5.5735	-0.4325	-2.9324	-6.5064	4.9426	-2.8262	4.3184	7.2177	6.5545	-6.5064	-4.6082	2.609	3.5436	-0.8863	-0.9406	-5.0116	1.816	-9.9658	-4.6082	-6.5064	3.8002	-5.0116	-2.8262	2.7572	8.6921	0.3685	-9.9658	3.1987	-4.035	-5.0116	-4.035	-6.5064	-2.4659	-9.9658
GBMLGG	TCGA-DH-A66F-01	2.67129	1.2209	-4.035	-3.458	-0.3566	4.4823	-3.3076	6.9093	2.0465	-0.8863	-3.3076	-3.458	-9.9658	-5.0116	-9.9658	-1.3548	-4.035	0.4233	3.4411	-0.3022	5.0027	7.3589	5.7198	-2.5479	-0.9406	3.6669	3.8601	-0.3022	-1.5522	-3.458	0.7493	-5.5735	-9.9658	-4.035	5.2821	-0.2845	-3.3076	2.7742	8.6395	1.8242	-6.5064	0.2881	-9.9658	-9.9658	-5.0116	-3.458	-1.7809	-9.9658
GBMLGG	TCGA-CS-5390-01	3.52232	1.1382	-5.5735	-4.6082	-1.1172	4.5844	-2.9324	5.2052	2.1247	-2.9324	-9.9658	-3.1714	-9.9658	-9.9658	-9.9658	-1.9379	-3.0469	-3.0469	3.4971	-2.1779	4.4693	6.7076	5.6071	-1.8836	-0.8863	3.7269	3.7741	0.679	-0.6193	-2.7274	1.5216	-4.035	-5.0116	-2.7274	5.0197	-0.6193	0.4761	3.0181	8.6397	1.0642	-4.035	2.694	-9.9658	-9.9658	-9.9658	-5.0116	-1.3921	-9.9658
GBMLGG	TCGA-S9-A6UA-01	3.65188	1.46	-3.0469	-1.3183	1.6604	7.0737	-0.4131	3.4958	5.0166	0.4016	1.0151	-1.5951	-9.9658	-5.5735	-5.5735	1.3679	0.2277	0.8488	6.1455	-1.5951	4.3841	7.2477	7.2057	-2.9324	2.9581	4.3979	4.079	4.6759	1.9188	-1.2481	2.667	-1.1811	-1.2828	-2.4659	4.585	2.2573	1.9188	4.1692	8.5775	4.449	-1.8314	2.7095	-9.9658	-9.9658	-3.3076	-2.0529	2.791	-3.458
GBMLGG	TCGA-32-2632-01	3.39921	1.5366	-0.8863	-1.3548	0.7664	6.6023	-0.3566	5.1676	5.0653	0.0014	1.3956	-3.3076	-1.0559	-3.816	-4.6082	1.0847	-0.3022	0.8805	5.9846	-0.013	4.2419	6.7413	6.7598	-3.458	2.4359	4.2412	4.851	4.2803	2.3048	-0.7346	3.1344	-1.9942	0.8488	-1.9379	5.575	5.2161	1.7912	4.499	8.5473	4.2743	-0.9132	3.3911	-9.9658	-9.9658	-3.0469	-0.6416	2.8994	-9.9658
GBMLGG	TCGA-FG-A87N-01	4.61476	1.5316	-9.9658	-4.035	-1.3183	6.9174	-2.8262	4.3562	3.603	-3.816	-2.5479	-1.685	-9.9658	-9.9658	-9.9658	-0.4521	-1.4699	-6.5064	5.7931	-4.035	6.1069	7.1337	5.5195	-1.2481	-1.2828	3.573	3.7836	0.1648	-0.5543	-4.2934	1.6604	-5.5735	2.0183	-3.458	5.7038	-0.8863	-0.1504	3.7992	9.0115	3.186	-6.5064	2.6805	-9.9658	-9.9658	-9.9658	-1.7322	0.6608	-9.9658
GBMLGG	TCGA-VV-A829-01	3.21725	1.0983	-4.2934	-2.8262	-1.4305	5.2958	-1.7322	3.2096	2.7679	-3.0469	-0.9132	-4.035	-9.9658	-9.9658	-4.035	-1.6394	-4.6082	-2.5479	3.6646	-3.6259	3.9356	7.369	5.3865	-1.9942	0.2029	3.7182	3.5187	0.2154	-0.394	-3.1714	0.6969	-4.2934	-9.9658	-5.5735	4.5614	-0.5973	-2.4659	3.3293	9.0082	1.1117	-6.5064	-0.6873	-9.9658	-9.9658	-9.9658	-1.685	3.6335	-9.9658
GBMLGG	TCGA-DH-A66B-01	3.02676	2.004	-9.9658	-4.2934	0.1257	6.2565	-2.3147	5.9129	4.366	0.2522	-0.1993	-2.8262	-9.9658	-3.0469	-4.035	-0.3201	-2.2447	-1.2828	5.2825	-1.7322	4.2243	7.5552	6.6109	-3.816	1.0915	3.6101	4.1515	2.1047	-0.7108	-3.6259	2.2113	-4.2934	-9.9658	-2.7274	4.8197	1.0847	0.0854	3.3535	8.883	4.1203	-2.8262	1.1447	-9.9658	-9.9658	-5.0116	0.2998	4.2212	-9.9658
GBMLGG	TCGA-HT-A5R7-01	3.13914	1.595	-1.9942	-3.458	0.3685	4.4344	-3.3076	6.4012	3.1278	-1.685	-2.9324	-1.9379	-9.9658	-9.9658	-5.5735	-0.9971	-3.6259	-3.458	4.1732	-2.6349	4.3702	6.6991	6.5755	-1.3921	-1.8314	3.9337	4.6764	-0.2845	-1.9379	-5.0116	1.2516	-9.9658	-1.4699	-3.0469	6.2173	-1.7809	-2.1779	2.9674	8.1638	2.1988	-5.0116	1.9302	-9.9658	-9.9658	-9.9658	-1.0559	2.5011	-9.9658
GBMLGG	TCGA-CS-5394-01	3.75168	1.6964	-5.0116	-3.1714	-1.7809	5.23	-5.5735	6.3381	0.6332	-9.9658	-3.1714	-4.035	-9.9658	-9.9658	-9.9658	-1.2142	-9.9658	-2.3147	2.5658	-2.1779	5.6488	7.6145	4.449	-1.5105	-2.1779	4.2541	0.9789	-0.7588	-1.8836	-1.3548	1.0433	-5.0116	-9.9658	-9.9658	5.1526	-1.8314	-0.5125	3.3307	8.9995	1.1316	-9.9658	-0.4521	-9.9658	-9.9658	-9.9658	-9.9658	-3.458	-9.9658
GBMLGG	TCGA-DH-A66D-01	3.04266	2.2452	-4.2934	-2.6349	0.2277	5.6056	-1.6394	7.5108	4.6381	-1.9379	-0.1504	-2.1779	-9.9658	-9.9658	-9.9658	0.2881	-2.9324	-1.1811	5.2107	-1.5951	4.5928	7.3918	6.6004	-0.0574	-0.6873	3.7496	4.4496	1.4228	-0.8599	-3.458	2.0111	-5.5735	-9.9658	-3.3076	6.2945	-0.1828	-1.5105	4.073	8.4568	3.3163	-4.035	2.7889	-9.9658	-9.9658	-5.0116	-0.7588	3.1458	-9.9658
GBMLGG	TCGA-HT-7877-01	3.30746	1.5316	-0.7834	-3.0469	-1.0262	4.2818	-1.9942	6.7766	2.0111	-9.9658	-2.9324	-3.458	-9.9658	-9.9658	-9.9658	-1.5951	-5.5735	-3.458	3.2915	-1.9379	4.9773	6.3827	5.9454	-2.8262	-2.5479	4.1011	4.5844	0.9038	-0.9132	-4.035	1.5013	-4.2934	-9.9658	-4.6082	5.5985	-3.6259	-3.458	3.5608	8.7861	0.9115	-6.5064	1.1641	-9.9658	-3.458	-9.9658	-4.035	-0.7108	-9.9658
GBMLGG	TCGA-06-0882-01	3.42895	1.5612	-3.816	-3.458	0.2998	6.6629	-1.7809	5.9855	5.3886	-1.3548	1.7532	-9.9658	-2.9324	-9.9658	-9.9658	-0.7834	-1.8314	-0.9406	5.7154	-2.3884	6.2774	7.6362	6.1404	-3.816	0.9568	4.0118	4.9021	2.2543	-0.2159	-1.3183	4.4223	-1.7322	1.3791	-2.3884	4.8084	3.4556	0.1388	4.5311	8.5858	6.4261	-3.816	2.5061	-3.6259	-4.035	-4.035	0.5271	3.835	-9.9658
GBMLGG	TCGA-DU-6542-01	3.27944	1.0433	-9.9658	-3.1714	1.0007	5.7339	-2.3884	7.1494	4.7099	-9.9658	0.3346	-3.3076	-9.9658	-9.9658	-9.9658	-0.8084	-3.1714	-2.3884	4.8802	-2.7274	4.2862	7.0077	6.4328	-0.9971	-0.2671	4.6376	5.5242	1.3679	-0.5756	-3.6259	2.5238	-4.6082	-2.9324	-2.7274	6.4517	1.6281	-1.1488	4.3855	8.765	2.5536	-9.9658	1.5266	-2.8262	-9.9658	-4.035	-1.2481	2.1047	-9.9658
GBMLGG	TCGA-QH-A6CS-01	2.57046	-0.0425	-1.5105	-1.1172	0.9493	4.9737	-2.9324	6.261	3.9654	-3.3076	-0.8339	-3.6259	-9.9658	-9.9658	-9.9658	-2.6349	-9.9658	-9.9658	4.6089	-2.1779	4.3371	7.0819	5.8854	-9.9658	-3.1714	2.0878	2.4857	-0.1993	-1.7809	-5.5735	3.6555	-9.9658	-9.9658	-4.2934	4.6224	-1.6394	-1.685	3.2127	7.8303	1.8683	-6.5064	3.7971	-9.9658	-5.0116	-5.0116	-0.6643	0.434	-9.9658
GBMLGG	TCGA-E1-A7YU-01	3.63807	1.9601	-2.3147	-2.9324	-0.8863	4.9444	-1.4699	6.1328	3.2811	-9.9658	-2.6349	-1.1488	-9.9658	-9.9658	-9.9658	0.7579	-9.9658	-6.5064	5.6674	-5.0116	3.4517	6.832	6.6465	-2.1779	-3.816	3.4609	2.2543	-1.4305	-1.0262	-9.9658	1.4962	-9.9658	-9.9658	-4.2934	5.1215	-3.6259	-6.5064	3.0876	8.4457	0.537	-6.5064	1.614	-9.9658	-9.9658	-9.9658	-1.8314	0.044	-9.9658
GBMLGG	TCGA-W9-A837-01	3.0215	1.2696	-4.2934	-5.5735	-0.5756	4.2142	-3.1714	6.7176	2.2573	-9.9658	-2.2447	-2.6349	-9.9658	-9.9658	-9.9658	-1.9379	-9.9658	-9.9658	3.6543	-0.7588	4.854	7.0073	5.9549	-1.5951	-3.816	3.8964	3.9774	-3.1714	-0.9686	-5.0116	0.4657	-9.9658	-5.0116	-6.5064	5.8306	-2.7274	-3.1714	3.1939	8.6326	0.1648	-9.9658	0.5859	-4.6082	-9.9658	-9.9658	-2.9324	2.8661	-9.9658
GBMLGG	TCGA-IK-7675-01	3.18587	1.0711	-5.0116	-1.3548	-0.8863	4.656	-9.9658	9.6703	3.1781	-9.9658	-1.1172	-2.6349	-9.9658	-9.9658	-9.9658	-0.3022	-5.5735	-3.6259	4.2041	-2.9324	4.5268	6.9877	5.8714	1.8036	-9.9658	2.128	2.4597	-1.7809	-2.9324	-6.5064	0.9642	-6.5064	-9.9658	-4.2934	6.6564	-2.9324	-5.0116	3.3003	8.9084	1.1706	-9.9658	1.0363	-9.9658	-9.9658	-9.9658	-0.7346	1.9931	-9.9658
GBMLGG	TCGA-DU-7306-01	2.757	0.7999	-4.6082	-0.7588	0.9935	5.1859	-2.9324	7.8573	2.96	-2.4659	-0.8339	-2.9324	-3.458	-9.9658	-9.9658	-1.0862	-4.2934	-2.5479	4.0357	-3.816	4.3506	7.2661	5.8235	-2.5479	-1.6394	4.1302	3.5947	0.3231	-1.3921	-3.816	1.6512	-3.3076	-3.1714	-3.3076	5.9526	0.688	-1.5105	3.1442	8.5137	4.6606	-9.9658	1.4011	-9.9658	-9.9658	-9.9658	-1.8314	-0.2159	-9.9658
GBMLGG	TCGA-QH-A6X9-01	3.15058	1.4494	-2.5479	-3.816	-0.2845	5.3452	-9.9658	7.6174	3.0893	-9.9658	-5.5735	-2.114	-9.9658	-9.9658	-9.9658	-0.5756	-3.6259	-4.6082	4.402	-3.3076	3.6905	6.8703	5.5865	-0.4921	-2.4659	3.573	3.5022	-0.9971	-1.3183	-9.9658	1.5013	-5.0116	-4.6082	-2.9324	5.4529	-4.2934	-4.6082	3.2096	8.9403	0.9038	-9.9658	0.1388	-3.6259	-9.9658	-9.9658	-1.4305	2.2842	-9.9658
GBMLGG	TCGA-S9-A6U0-01	3.58133	3.2359	-2.8262	-1.2481	0.7058	6.647	-0.4719	6.8746	3.9431	0.688	-1.8836	-3.1714	-2.6349	-3.0469	-2.1779	-0.5125	0.4657	0.2277	5.8965	-0.2845	7.7369	7.5655	6.7536	-1.9942	3.1028	4.1852	5.3256	4.6905	2.183	-1.4699	3.616	-0.2845	-2.7274	-2.8262	6.1198	4.149	3.2737	5.5623	8.9111	2.6302	-1.1811	2.299	-9.9658	-9.9658	-3.816	-1.7809	1.2209	-9.9658
GBMLGG	TCGA-HT-7611-01	2.9616	1.2875	-9.9658	-2.5479	1.1447	5.6514	-3.458	7.9958	4.3807	-9.9658	0.2522	-5.5735	-9.9658	-9.9658	-9.9658	-1.6394	-4.2934	-2.6349	4.8405	-1.3921	3.7335	6.8338	5.4954	-1.8836	-1.5105	4.2818	5.3572	1.4441	-1.9942	-3.816	2.6348	-4.6082	-5.0116	-4.6082	6.4746	0.24	-1.1811	4.2684	9.2519	3.7215	-5.0116	1.642	-9.9658	-9.9658	-4.6082	-0.2328	1.9111	-9.9658
GBMLGG	TCGA-S9-A6TY-01	3.2403	1.0363	-5.5735	-3.6259	-0.9406	4.2936	-2.8262	5.9734	1.3397	-9.9658	-5.5735	-3.1714	-9.9658	-9.9658	-9.9658	-0.4921	-5.5735	-3.6259	2.5658	-2.8262	4.9241	7.3287	3.7794	-1.7809	-5.0116	4.1756	3.8866	-1.7322	-0.4921	-6.5064	0.7999	-6.5064	-5.0116	-3.6259	5.6314	-4.2934	-4.6082	2.7847	8.6591	0.346	-9.9658	1.0503	-9.9658	-5.5735	-9.9658	-6.5064	-1.7322	-9.9658
GBMLGG	TCGA-DU-A7TB-01	2.83388	1.1382	-4.6082	-6.5064	-1.7322	4.9951	-4.6082	3.5324	2.7487	-9.9658	-3.458	-3.816	-9.9658	-5.0116	-9.9658	-1.2828	-9.9658	-3.3076	3.7529	-5.5735	3.4687	7.4659	4.8768	-1.0862	-4.035	2.9338	3.2127	-1.1172	-0.1031	-6.5064	1.0915	-9.9658	-9.9658	-4.2934	4.5002	-4.035	-5.0116	2.909	8.4523	0.099	-9.9658	1.5064	-9.9658	-9.9658	-9.9658	-2.3884	0.044	-9.9658
GBMLGG	TCGA-19-2625-01	3.06693	0.6425	-1.5522	-1.6394	0.9642	7.6846	-5.0116	3.5498	2.8641	-2.4659	-0.6193	-2.0529	-0.9686	-9.9658	-9.9658	0.03	-3.3076	-2.4659	4.866	-4.6082	9.7322	7.7574	4.4377	-3.458	-1.4305	2.7227	3.6543	1.2516	-1.5105	-4.2934	1.412	-9.9658	-3.816	-2.5479	3.9384	2.1213	-1.7809	2.1862	7.4427	5.4816	-5.5735	0.2998	-4.6082	-9.9658	-9.9658	-0.0425	1.0433	-9.9658
GBMLGG	TCGA-IK-8125-01	3.23877	1.5216	-4.6082	-4.6082	-0.394	4.5454	-2.5479	6.2939	2.4857	-4.6082	-0.8084	-3.6259	-9.9658	-6.5064	-9.9658	-1.7322	-9.9658	-2.4659	2.9469	-1.1172	4.6793	6.5665	5.5352	-3.1714	-1.9379	3.7603	2.3649	-0.2328	-1.1811	-2.5479	1.3109	-5.5735	-3.6259	-6.5064	5.1006	-0.8599	-3.3076	3.6714	8.6683	1.6187	-9.9658	0.537	-9.9658	-9.9658	-9.9658	-2.0529	2.5683	-4.2934
GBMLGG	TCGA-WH-A86K-01	1.90304	1.9226	-3.6259	-4.6082	-1.6394	4.3191	-2.0529	8.2295	2.667	-9.9658	-3.0469	-2.5479	-9.9658	-5.0116	-9.9658	-0.1993	-5.0116	-3.6259	4.6218	-2.7274	5.3392	8.0545	5.1019	-2.7274	-0.7108	4.0216	4.6404	0.4657	-1.7322	-3.6259	1.8119	-5.0116	-5.0116	-4.2934	6.0624	-0.4719	-4.2934	3.0163	8.5503	2.6464	-5.5735	0.9191	-9.9658	-9.9658	-5.5735	-1.9942	0.5069	-9.9658
GBMLGG	TCGA-DH-5141-01	2.33911	1.0363	-9.9658	-9.9658	-1.0262	4.1748	-4.2934	6.2614	1.8643	-6.5064	-1.1488	-5.0116	-9.9658	-9.9658	-9.9658	-1.1172	-2.7274	-1.5951	3.4129	-2.5479	4.5429	7.6765	5.5018	-5.5735	-1.8314	2.4359	3.6827	-0.0277	-2.3884	-4.2934	1.2516	-6.5064	-9.9658	-6.5064	5.969	-0.4719	-2.4659	2.4518	8.4387	2.3536	-9.9658	0.7407	-9.9658	-9.9658	-9.9658	-3.816	3.074	-9.9658
GBMLGG	TCGA-FG-A60L-01	2.74848	1.8201	-1.5951	-2.3147	0.03	5.4283	-4.2934	4.8243	4.1433	-9.9658	-4.035	-2.7274	-2.3147	-9.9658	-9.9658	0.8408	-1.8836	-3.1714	5.6874	-3.1714	3.2572	8.7502	6.8939	-0.7588	-1.2828	1.9601	3.652	1.5165	-0.3022	-5.0116	1.2934	-6.5064	-4.035	-4.035	5.5069	-1.9942	-5.5735	3.0619	7.4495	2.3508	-6.5064	2.6602	-5.0116	-5.5735	-9.9658	-2.5479	1.9712	-9.9658
GBMLGG	TCGA-DB-5280-01	2.75913	1.8444	-9.9658	-0.5332	-0.2671	5.3122	-2.2447	9.9028	2.6371	-4.6082	0.2881	-3.3076	-9.9658	-9.9658	-9.9658	-1.2142	-4.035	-2.8262	5.1547	-1.7322	4.8202	7.5282	5.6918	-1.4305	-2.3884	3.1393	3.7614	0.3115	-1.0559	-1.3921	1.5115	-5.0116	-4.6082	-9.9658	6.6294	1.1184	-0.0425	3.6827	9.1557	2.4649	-9.9658	0.3346	-9.9658	-9.9658	-9.9658	-1.2481	0.2154	-9.9658
GBMLGG	TCGA-S9-A7IX-01	3.82069	2.328	0.7493	-2.9324	2.0147	5.745	-2.114	5.6136	4.5091	-3.816	-0.8599	-3.816	-1.5951	-4.2934	-9.9658	-1.1488	-3.3076	-2.1779	5.7038	-2.3147	4.9677	7.2783	6.275	-3.0469	0.4447	3.6589	4.3924	1.5216	-0.5332	-3.0469	2.5011	-4.2934	-3.458	-2.4659	5.9568	1.0503	0.2642	4.4108	8.1789	2.8096	-6.5064	3.6657	-3.3076	-5.5735	-9.9658	0.537	4.7242	-9.9658
GBMLGG	TCGA-32-1980-01	3.28985	2.2603	-3.816	-3.1714	1.0779	6.1906	-1.7322	4.4829	5.1256	-0.5543	0.8961	-3.3076	-9.9658	-4.6082	-3.458	-0.013	-1.4699	0.346	5.4446	-1.8314	7.4244	7.2467	6.582	-3.6259	2.9469	3.8591	3.8431	3.402	0.3796	-1.0862	4.2646	-0.7834	-0.8863	-2.4659	5.4582	4.314	2.376	4.4764	8.0161	5.2691	-2.1779	2.4225	-9.9658	-5.0116	-2.7274	0.2762	3.9682	-9.9658
GBMLGG	TCGA-FG-5965-01	3.21412	1.5998	-1.7809	-2.1779	-1.2828	5.2803	-1.7809	8.1366	3.8866	-1.5951	0.4967	-2.3884	-9.9658	-4.2934	-5.0116	-0.8084	-2.1779	-2.6349	4.7898	-2.2447	3.5572	6.5525	6.7816	-1.2142	-0.2845	3.9175	4.1812	2.9128	-0.6873	-3.6259	1.7786	-3.3076	-9.9658	-2.5479	5.7035	1.4494	-1.1172	4.0807	8.6112	2.9205	-2.9324	2.6533	-9.9658	-9.9658	-9.9658	0.2642	5.3399	-4.2934
GBMLGG	TCGA-P5-A5F6-01	2.43293	-0.5543	-4.6082	-2.6349	-2.3884	7.1888	-5.5735	3.1409	1.1447	-4.035	-0.6416	-5.0116	-9.9658	-9.9658	-9.9658	2.6533	-3.816	-2.5479	5.8197	-2.0529	5.6508	6.9974	2.7379	-6.5064	-0.9132	2.1541	2.4279	1.0573	-0.8863	-1.4305	5.4549	-9.9658	-9.9658	-4.2934	6.1689	-0.8599	-2.3147	1.8524	7.5114	2.4063	-9.9658	-1.3548	-9.9658	-9.9658	-9.9658	-6.5064	0.0854	-9.9658
GBMLGG	TCGA-27-1834-01	4.18273	1.6045	-3.6259	-1.0862	2.3479	6.1759	-0.5125	5.8961	5.3064	0.3907	0.24	-5.0116	-9.9658	-9.9658	-5.0116	1.0573	-0.6873	0.3573	5.6727	2.4225	5.4243	7.7497	6.5934	-0.9406	3.0305	4.8324	5.7019	3.5199	0.2998	-1.8314	3.6359	-0.5973	-1.685	-0.0877	5.3107	5.8674	2.1114	4.7501	7.9345	4.3075	-2.114	2.4359	-9.9658	-9.9658	-2.8262	1.6875	4.0471	-9.9658
GBMLGG	TCGA-DU-7007-01	2.73769	1.2636	-5.5735	-3.458	0.4865	6.2836	-2.2447	6.7459	3.8521	-1.2142	1.2271	-3.816	-1.685	-9.9658	-5.0116	1.4011	-1.9942	0.7664	4.9575	-1.4305	5.1177	6.8142	5.7121	-1.1172	2.1378	5.2036	5.1974	3.5362	1.4704	-0.6873	2.7029	-0.8084	-2.7274	-1.5105	5.6168	1.8078	1.1706	3.4088	8.6311	4.1252	-3.458	1.8643	-9.9658	-9.9658	-5.5735	-0.7108	3.6737	-9.9658
GBMLGG	TCGA-HW-7490-01	1.73985	1.6187	-2.6349	-4.2934	0.3907	4.6468	-2.3884	8.3635	3.2662	-4.035	-2.9324	-3.458	-9.9658	-9.9658	-5.5735	-1.0559	-2.9324	-2.4659	4.1019	-1.685	4.2548	7.8174	5.63	-2.0529	-0.5756	4.2335	5.2449	1.6281	-1.4699	-3.458	1.7446	-3.816	-5.0116	-3.458	6.3237	1.8801	-1.5522	3.5535	8.6977	2.7889	-5.0116	-0.9406	-9.9658	-9.9658	-9.9658	-1.5105	2.8158	-9.9658
GBMLGG	TCGA-CS-6188-01	4.19218	1.4228	-0.9971	-5.0116	0.3796	6.5812	-1.0862	6.5488	5.0171	-1.8836	-0.7588	-3.3076	-2.8262	-9.9658	-9.9658	-2.4659	-3.0469	-2.4659	5.2304	-3.458	6.1223	7.1758	6.2928	-3.0469	-1.0262	4.3002	5.6642	0.679	-1.1811	-3.816	2.4727	-5.5735	-2.0529	-3.1714	5.2308	0.1257	-0.3022	4.3031	9.0055	2.6579	-3.816	2.2573	-9.9658	-9.9658	-5.0116	-0.5332	1.6695	-9.9658
GBMLGG	TCGA-CS-6668-01	4.08154	1.5115	-3.0469	-3.3076	-1.1172	5.4483	-4.6082	5.138	1.7575	-9.9658	-5.5735	-3.3076	-9.9658	-9.9658	-9.9658	-0.7834	-5.0116	0.2029	2.1957	0.3346	3.7614	6.051	4.4223	-1.4699	-3.0469	4.7835	3.4933	-0.4131	-0.9971	-6.5064	0.434	-9.9658	-3.0469	-2.7274	5.5753	-2.114	-3.816	3.3076	8.8283	1.4335	-9.9658	-0.4131	-9.9658	-9.9658	-9.9658	-6.5064	-2.1779	-9.9658
GBMLGG	TCGA-DU-8165-01	4.15543	1.3901	-1.8314	-0.1993	0.8164	6.5275	-0.4719	6.6719	4.7082	0.2154	1.2209	-5.0116	-9.9658	-9.9658	-5.5735	0.4865	-1.1488	1.9188	4.8415	-0.1504	7.1389	6.5768	6.1424	-2.114	3.1971	4.3126	4.7263	4.225	1.3901	-0.5543	3.2374	-0.0277	-2.0529	-0.1828	3.6691	4.4216	2.9911	4.7485	8.8329	3.992	-1.2828	2.8562	-9.9658	-3.816	-2.0529	1.949	5.1498	-9.9658
GBMLGG	TCGA-HT-7692-01	2.68262	1.125	-4.035	-4.2934	-1.6394	4.1867	-9.9658	4.8949	2.4831	-9.9658	-2.6349	-2.5479	-9.9658	-4.6082	-9.9658	-0.4921	-5.0116	-4.2934	3.6066	-2.3147	3.6242	7.2087	4.402	-0.6643	-2.7274	3.0463	1.674	0.044	-1.3183	-5.5735	0.8082	-9.9658	-9.9658	-3.816	4.3597	-2.6349	-2.8262	3.0181	8.5712	0.03	-6.5064	-0.9971	-9.9658	-9.9658	-9.9658	-3.458	1.5806	-9.9658
GBMLGG	TCGA-TQ-A7RM-01	5.42026	2.7401	-4.6082	-1.5522	-2.6349	5.2627	-5.0116	7.6107	1.7828	-9.9658	-2.114	-3.816	-9.9658	-9.9658	-5.0116	0.1776	-5.0116	-1.7809	4.0445	-2.2447	5.9846	7.2918	3.4933	-0.7588	-1.0862	0.9191	1.7954	0.1257	-1.1811	-5.0116	0.7748	-5.0116	-5.0116	-6.5064	5.1301	-2.3147	-2.8262	3.603	9.2946	0.6608	-9.9658	1.6466	-9.9658	-9.9658	-9.9658	-2.3884	0.4967	-9.9658
GBMLGG	TCGA-DU-8161-01	3.80424	1.2333	-2.6349	0.3796	1.4962	5.7388	0.4233	7.7513	4.9045	2.8055	-0.7834	-2.5479	-9.9658	-4.6082	-5.5735	1.0779	0.2029	1.6964	4.7269	0.6425	4.6288	7.3887	6.9113	-3.1714	2.4439	4.6955	5.2795	4.0216	1.3051	-1.1172	3.2796	-1.1172	-1.2481	-1.0262	4.7597	6.1361	5.5546	4.9303	8.3815	3.4224	-0.0574	1.595	-4.6082	-5.5735	-1.8836	-1.1811	3.2466	-9.9658
GBMLGG	TCGA-P5-A736-01	2.0496	1.9226	-0.7834	-1.8314	0.8164	5.0131	-3.458	6.7914	4.4621	-3.3076	1.177	-9.9658	-2.3147	-9.9658	-9.9658	-1.3183	-3.0469	-0.6873	5.2593	-0.4325	2.7847	7.9067	6.8642	-2.8262	0.4967	2.8897	3.7603	2.2391	-0.3752	-2.0529	2.9674	-3.458	-4.6082	-3.458	5.3399	0.7916	-1.9379	3.5935	8.4787	3.8431	-6.5064	1.2455	-9.9658	-9.9658	-5.0116	-0.0277	1.4547	-9.9658
GBMLGG	TCGA-DU-6401-01	1.6415	1.9034	-4.035	-3.1714	-1.0559	4.8172	-0.9686	7.9219	3.3379	-4.6082	0.3796	-4.2934	-9.9658	-3.6259	-5.0116	-1.9942	0.2998	-3.816	5.1289	-3.458	5.4186	7.1506	5.7824	-3.3076	-2.114	3.0358	3.6961	0.24	-3.0469	-0.9686	1.7316	-5.0116	-2.8262	-1.9942	7.8013	3.1458	-2.9324	3.5324	8.3826	6.7756	-5.5735	0.6969	-9.9658	-9.9658	-9.9658	-0.3383	5.5469	-9.9658
GBMLGG	TCGA-HT-A74H-01	2.45154	0.9115	-2.8262	-1.0262	-0.2159	4.7825	-1.7322	5.1215	3.8876	-3.6259	-1.5522	-3.458	-9.9658	-9.9658	-9.9658	-1.6394	-3.1714	-1.9942	4.298	-1.3548	2.8402	7.4824	5.796	-4.6082	0.3231	2.236	3.4791	2.4332	-0.7834	-4.035	2.2901	-3.1714	-5.0116	-6.5064	4.1907	-0.1993	-0.8084	3.0056	8.2532	3.5766	-5.0116	2.5561	-9.9658	-9.9658	-5.5735	-0.9686	-0.4325	-9.9658
GBMLGG	TCGA-41-2571-01	3.24486	1.2455	-5.5735	-4.6082	-1.9942	5.9449	-4.035	3.2205	3.6254	-3.0469	-1.0862	-2.9324	-9.9658	-9.9658	-9.9658	-1.3548	-2.3147	-2.3884	4.1579	-3.3076	9.0913	6.8019	4.1796	-1.9942	-2.114	2.4035	2.1378	0.6608	-2.1779	-2.8262	1.3454	-9.9658	-2.8262	-4.2934	2.824	-0.9132	-4.2934	2.1574	6.598	1.7273	-9.9658	1.5661	-9.9658	-9.9658	-9.9658	-0.8339	2.8974	-9.9658
GBMLGG	TCGA-TQ-A7RV-01	2.8319	2.4934	-5.5735	-2.8262	-1.3921	5.248	-6.5064	7.338	3.1844	-9.9658	-5.0116	-1.6394	-9.9658	-9.9658	-9.9658	-0.7588	-4.2934	-5.5735	4.918	-1.5105	5.6565	7.3168	5.9688	-2.2447	-2.0529	3.3017	3.4116	-0.8863	-0.6873	-6.5064	1.1512	-5.5735	-9.9658	-4.6082	6.2384	-2.3147	-3.3076	3.6849	8.804	0.0718	-9.9658	1.9452	-9.9658	-9.9658	-9.9658	-3.458	-1.2142	-9.9658
GBMLGG	TCGA-14-0781-01	2.76553	1.7185	-1.4305	-4.035	3.449	7.3895	-2.114	5.4851	4.3834	-2.8262	1.1512	-5.5735	-2.4659	-9.9658	-9.9658	-0.5332	-2.114	-2.2447	6.0215	-2.9324	8.677	7.4243	5.8977	-5.5735	0.5666	3.9719	5.2487	1.934	-0.6193	-3.1714	3.2282	-2.4659	3.9213	-2.7274	5.445	2.5137	-4.035	4.7143	8.0561	7.0938	-3.6259	2.3508	-9.9658	-9.9658	-5.0116	2.299	4.1343	-9.9658
GBMLGG	TCGA-HT-7483-01	3.15377	1.6785	-2.114	-3.0469	-0.1345	5.3227	-2.3884	8.3057	2.9413	-9.9658	-1.2142	-3.1714	-9.9658	-9.9658	-9.9658	-0.4521	-3.0469	-2.5479	4.5009	-1.6394	4.4476	6.9281	5.2258	-1.5105	-1.2481	3.0671	3.2572	0.9191	-1.5522	-3.3076	2.3479	-9.9658	-9.9658	-3.1714	6.4581	0.4016	-1.685	4.1036	9.3855	3.7259	-5.5735	0.4125	-9.9658	-9.9658	-9.9658	-1.1488	2.8916	-9.9658
GBMLGG	TCGA-HT-7620-01	2.91837	1.2516	-9.9658	-6.5064	-0.394	4.6809	-3.816	6.2996	3.6289	-9.9658	-1.6394	-3.3076	-9.9658	-9.9658	-5.5735	-0.7346	-2.114	-2.3884	3.9829	1.6649	4.2987	6.8855	5.72	-2.6349	-2.8262	3.5851	3.8023	-0.4325	-0.3752	-9.9658	1.7786	-5.5735	-1.8836	-4.035	4.8739	-3.3076	-3.458	3.6347	8.8402	1.8564	-9.9658	4.5699	-9.9658	-5.0116	-3.3076	-1.6394	1.1833	-9.9658
GBMLGG	TCGA-HT-7480-01	3.04792	1.949	-4.6082	-4.035	-0.6193	4.6265	-0.9971	7.3099	2.5363	-9.9658	-1.685	-2.8262	-9.9658	-5.5735	-5.5735	-0.4719	-5.0116	-3.458	3.9031	-1.685	5.1595	6.4016	5.2932	-1.7322	-1.1811	4.5589	4.66	-0.5125	-0.5973	-6.5064	1.4281	-4.6082	-3.458	-4.6082	6.2651	-1.3921	-1.7809	3.5249	8.7177	0.7493	-6.5064	0.6608	-9.9658	-9.9658	-9.9658	-3.0469	-0.5332	-9.9658
GBMLGG	TCGA-06-0157-01	4.3016	2.4727	-2.7274	-2.6349	-0.3201	6.9375	-2.8262	7.7188	4.3278	-0.2498	1.2756	-9.9658	-1.5105	-5.5735	-9.9658	0.2522	-2.114	0.3685	5.9315	-2.1779	7.0773	7.3744	5.3975	-2.4659	1.9968	4.3667	4.3002	3.0825	0.3115	-0.7346	2.9984	-1.5951	-2.5479	-2.6349	4.7861	3.0393	0.24	4.6358	8.2282	3.2796	-3.458	1.0983	-9.9658	-9.9658	-9.9658	-0.8599	3.38	-9.9658
GBMLGG	TCGA-S9-A7J0-01	4.98872	1.6374	-3.458	-2.3884	-1.0559	6.2348	-3.1714	4.9805	2.9966	-9.9658	-1.0862	-1.685	-9.9658	-5.5735	-5.5735	2.1345	-3.6259	-1.9379	4.3148	-2.9324	4.8053	6.7731	4.8837	1.3735	-1.9942	4.2243	3.8187	-0.9406	-0.1828	-4.6082	1.105	-9.9658	-2.4659	-5.0116	4.6312	-0.2498	-3.1714	3.0927	9.7062	1.2756	-9.9658	0.3796	-9.9658	-9.9658	-5.5735	-2.9324	0.3573	-9.9658
GBMLGG	TCGA-12-3653-01	4.47702	1.5316	-2.3147	-1.3548	2.4597	6.7029	-4.035	7.3576	3.8739	1.787	-1.8314	-2.8262	-9.9658	-9.9658	-9.9658	1.4174	-1.7809	-1.1488	5.0401	-2.9324	5.8217	7.5667	5.436	-3.6259	0.2642	7.2605	7.2925	1.9786	-0.4325	-1.8314	2.561	-3.3076	-3.816	0.1257	4.7225	6.8627	1.4228	3.9232	8.4496	4.5079	-2.9324	1.9895	-9.9658	-9.9658	-9.9658	-1.7809	2.9948	-9.9658
GBMLGG	TCGA-TM-A84Q-01	3.12098	1.3791	-3.458	-3.0469	-1.2142	5.2323	-2.0529	5.5732	4.2427	-0.6193	0.4233	-2.8262	-3.458	-9.9658	-9.9658	-0.3566	-3.1714	-1.7322	4.4938	-1.8314	4.7491	7.0969	5.7669	-3.0469	0.058	3.9589	4.5596	1.2815	-0.1345	-2.3884	1.6785	-4.035	-3.3076	-4.6082	5.22	-2.3147	-2.3147	3.3293	8.6209	2.5388	-5.0116	2.4465	-9.9658	-9.9658	-9.9658	-0.6643	4.8228	-9.9658
GBMLGG	TCGA-76-4926-01	4.16346	0.8568	0.1776	-0.8084	1.0222	6.4157	-2.3884	6.494	3.449	1.3109	-0.3201	-3.3076	-9.9658	-9.9658	-9.9658	-1.0262	-4.035	-2.8262	4.4317	-1.5522	7.1259	7.2484	5.7538	-6.5064	-1.2142	4.1103	5.1264	1.1641	-0.7108	-2.6349	1.816	-4.035	1.0363	-2.2447	4.4476	4.3786	0.5568	3.8818	8.9692	3.668	-4.6082	1.6281	-9.9658	-9.9658	-9.9658	-0.8863	1.1512	-9.9658
GBMLGG	TCGA-26-5133-01	4.35053	1.1316	-3.6259	-2.5479	1.1316	6.9104	-4.2934	5.7151	2.5948	-1.9379	-0.8339	-4.2934	-9.9658	-9.9658	-3.816	-0.0425	-2.1779	-1.9942	5.2552	-3.1714	6.7739	7.4179	4.4562	-1.0862	-1.5522	3.7345	3.9838	0.8408	-0.9406	-3.458	1.816	-4.035	1.0293	-4.035	5.3165	1.4065	-2.114	3.162	7.5877	0.8164	-6.5064	1.8036	-9.9658	-9.9658	-9.9658	-3.6259	0.03	-9.9658
GBMLGG	TCGA-06-2562-01	3.29864	1.1577	-3.1714	-6.5064	4.6933	8.4226	-1.5522	5.9743	4.8944	-3.6259	0.24	-4.2934	-9.9658	-9.9658	-9.9658	-0.7834	-2.3884	-1.0559	6.2267	-6.5064	9.5845	7.1658	5.2157	-3.1714	-0.5756	3.8866	4.9837	1.2085	-0.9132	-2.4659	3.6657	-5.5735	-0.5756	-1.0262	5.7304	2.328	-0.5973	4.9755	8.7545	6.3686	-5.0116	2.578	-9.9658	-9.9658	-5.0116	2.0325	5.8878	-9.9658
GBMLGG	TCGA-RY-A847-01	2.91073	1.5854	-3.3076	-4.2934	-0.9406	4.0109	-1.3548	6.9279	3.6006	-9.9658	-2.4659	-5.5735	-2.3147	-9.9658	-9.9658	-1.3548	-5.0116	-2.3884	4.9514	1.3454	3.4156	7.0584	6.2403	-3.1714	-0.8599	2.9618	3.8431	-0.0574	-1.9379	-3.0469	1.8282	-5.0116	-3.816	-4.2934	5.3187	0.7999	-2.1779	3.4713	8.5382	1.4652	-9.9658	0.8805	-9.9658	-5.0116	-9.9658	-0.7108	4.0756	-9.9658
GBMLGG	TCGA-TQ-A7RQ-01	3.61941	2.0111	-5.5735	-9.9658	-1.2828	4.7882	-1.7809	4.2072	1.2394	-9.9658	-4.2934	-2.6349	-9.9658	-9.9658	-9.9658	-0.4719	-3.0469	-5.5735	3.6347	-3.6259	4.9755	6.7781	5.1429	-2.3884	-5.0116	4.174	3.4048	0.0014	-0.0574	-3.0469	0.2762	-5.0116	-5.0116	-9.9658	5.2312	-1.9379	-3.3076	3.1228	8.6335	1.334	-9.9658	-1.1811	-9.9658	-9.9658	-9.9658	-1.3921	3.7762	-9.9658
GBMLGG	TCGA-TQ-A7RW-01	3.17634	1.0079	-4.2934	-2.4659	0.2277	5.3248	-1.1811	7.2684	4.7783	-1.685	-2.1779	-2.4659	-9.9658	-9.9658	-9.9658	-0.5125	-2.5479	-2.1779	5.4967	-2.1779	4.9801	6.9984	7.1229	-1.5951	0.7493	4.0653	4.8788	1.4441	0.0014	-3.816	1.6187	-4.2934	-4.2934	-4.035	6.1483	0.9115	-0.1504	4.3263	8.2694	1.2875	-2.8262	1.8363	-9.9658	-9.9658	-5.0116	-2.6349	2.7314	-9.9658
GBMLGG	TCGA-FG-8191-01	2.6848	0.6145	-1.9379	-2.2447	0.9038	4.7127	-2.6349	7.3801	4.1417	-2.5479	0.2881	-3.816	-9.9658	-9.9658	-9.9658	0.6517	0.547	-3.0469	4.6697	-2.3884	5.4631	6.7856	6.4288	-0.9686	-1.7322	3.4075	3.3177	0.9862	-1.685	-4.6082	1.1641	-5.0116	-2.6349	-2.1779	5.0392	-0.5543	-0.7588	3.2511	8.5391	3.0774	-6.5064	1.7097	-9.9658	-9.9658	-4.6082	0.9115	5.8861	-9.9658
GBMLGG	TCGA-E1-A7YW-01	3.14241	1.7273	-1.8836	-1.9942	-0.3752	5.3202	-3.6259	6.3255	4.0488	-3.1714	-1.0862	-0.9686	-9.9658	-9.9658	-9.9658	0.0854	-4.035	-6.5064	6.1471	-3.458	3.6277	6.9811	7.035	-1.1488	-3.6259	3.0876	3.3521	-2.5479	-0.9406	-5.5735	1.2147	-5.5735	-3.6259	-4.2934	4.917	-2.2447	-3.0469	3.2617	8.8425	2.5876	-9.9658	0.8488	-9.9658	-5.0116	-9.9658	-0.5756	3.4933	-9.9658
GBMLGG	TCGA-DB-5278-01	3.03562	1.3167	-3.458	-5.5735	-0.9406	5.3534	-4.6082	7.2277	3.0944	-9.9658	-0.6873	-5.0116	-9.9658	-9.9658	-9.9658	-1.8836	-4.035	-2.7274	4.3827	-0.5543	3.6382	7.1339	5.5589	-2.0529	-1.685	3.2282	4.2173	0.8961	-1.2481	-2.7274	1.8722	-4.035	-3.816	-4.2934	6.5034	-1.8836	-1.5105	3.5387	8.8634	1.3283	-6.5064	0.7579	-9.9658	-9.9658	-9.9658	-3.0469	0.8488	-9.9658
GBMLGG	TCGA-E1-A7YS-01	3.81558	0.9789	-9.9658	-4.6082	-0.8863	4.3075	-2.3147	5.4748	1.8801	-4.2934	-2.9324	-1.3548	-9.9658	-9.9658	-5.5735	0.2277	-2.5479	-5.0116	2.7422	-3.816	4.38	6.9391	4.3169	0.0718	-2.6349	4.7296	4.9341	-0.7588	-0.4521	-4.2934	-0.1504	-5.5735	-9.9658	-6.5064	5.2495	-2.4659	-3.0469	3.0002	8.4797	1.0433	-6.5064	-0.8084	-9.9658	-9.9658	-9.9658	-4.2934	0.8164	-9.9658
GBMLGG	TCGA-HT-7695-01	3.26303	1.2636	-1.5105	-5.5735	-0.5125	4.8263	-4.035	7.7599	2.6962	-9.9658	-4.035	-3.0469	-9.9658	-9.9658	-9.9658	-2.5479	-4.2934	-3.6259	3.2707	-1.5951	4.2274	6.6424	5.2895	-2.5479	-2.6349	3.9118	4.4977	-0.4521	-0.8599	-4.035	1.5612	-5.5735	-5.0116	-9.9658	6.5173	-1.3183	-2.3147	3.5161	8.7928	0.5666	-6.5064	1.5013	-9.9658	-4.6082	-9.9658	-1.5522	2.233	-5.5735
GBMLGG	TCGA-DU-7012-01	3.37298	1.7053	-2.9324	0.7058	2.6805	6.2527	1.3454	7.4415	5.4091	1.9264	1.3901	-3.3076	-9.9658	-5.5735	-4.6082	0.7579	-0.4921	2.5852	5.2377	2.128	4.4829	7.0458	6.6739	-2.3147	3.4477	4.5583	5.7301	4.9946	2.1541	0.5069	3.6497	-0.2159	-2.0529	0.2277	4.162	5.6585	5.2442	4.9681	8.4449	4.6456	0.8647	2.2206	-9.9658	-9.9658	-1.4699	2.2842	4.9996	-9.9658
GBMLGG	TCGA-HT-7879-01	3.08916	2.4883	-2.6349	-0.2671	-0.4921	5.2806	-2.9324	8.3647	4.1119	-9.9658	-0.5125	-1.8836	-9.9658	-9.9658	-9.9658	0.9493	-6.5064	-2.8262	5.6491	-2.5479	4.431	7.1276	6.4256	-0.2498	-2.3147	3.8531	4.6206	-0.3752	-0.6416	-5.0116	2.043	-4.2934	-9.9658	-5.5735	5.5943	-3.0469	-1.7322	4.0427	8.9499	2.0844	-6.5064	1.2271	-9.9658	-9.9658	-9.9658	-3.816	1.4065	-9.9658
GBMLGG	TCGA-DU-A7TC-01	2.84394	1.177	-3.3076	-9.9658	-0.8863	4.9828	-2.4659	4.2639	2.7763	-9.9658	-4.6082	-3.0469	-9.9658	-9.9658	-9.9658	-0.7588	-5.5735	-6.5064	4.841	-4.035	3.2707	7.5015	5.9554	-2.5479	-3.458	2.824	2.9394	-0.3566	-1.5522	-6.5064	0.3907	-9.9658	-4.2934	-4.6082	6.0479	-2.8262	-4.035	2.6579	8.2315	0.0158	-9.9658	-0.7108	-2.7274	-9.9658	-9.9658	-2.3147	1.7786	-9.9658
GBMLGG	TCGA-27-2521-01	3.34059	1.1447	-4.6082	-2.8262	-2.114	6.5008	-5.0116	7.0638	2.8199	-9.9658	-0.8863	-2.1779	-2.4659	-9.9658	-9.9658	-0.1187	-4.2934	-1.6394	4.7544	-2.5479	6.9068	7.6341	4.8885	-0.013	-2.2447	2.9893	3.3321	0.6608	-1.8836	-3.816	2.1734	-5.0116	-2.8262	-3.0469	4.3702	-0.5332	-1.6394	3.5839	9.0083	2.6647	-6.5064	-0.5756	-9.9658	-9.9658	-9.9658	-2.1779	-0.0425	-9.9658
GBMLGG	TCGA-HT-7680-01	2.89332	-0.9686	0.0718	-1.9942	0.6145	4.6154	-2.4659	6.8192	4.1474	-2.1779	-0.3752	-9.9658	-9.9658	-9.9658	-5.0116	-3.3076	-2.114	-0.4921	4.5305	-0.8863	3.9663	6.9323	7.2907	-9.9658	-1.4305	3.9774	4.0901	1.8484	-0.7346	-4.2934	3.3307	-4.2934	-9.9658	-3.6259	4.9175	-1.1488	-3.3076	4.034	8.7966	3.2662	-4.6082	-0.0574	-9.9658	-9.9658	-4.2934	1.4547	7.1451	-9.9658
GBMLGG	TCGA-DB-A4X9-01	3.58738	1.6045	-9.9658	-0.1828	-0.2328	4.9141	-2.1779	9.0776	3.603	-9.9658	-0.2159	-1.2142	-9.9658	-9.9658	-9.9658	0.3685	-3.6259	-9.9658	5.336	-0.9686	2.5511	8.135	6.3853	-3.6259	-3.0469	4.2973	4.8115	-2.3147	-2.6349	-6.5064	1.0433	-9.9658	-3.1714	-5.5735	5.533	-1.5951	-5.5735	3.7259	9.1451	2.5112	-9.9658	1.9895	-9.9658	-9.9658	-9.9658	-0.2845	3.3379	-9.9658
GBMLGG	TCGA-TQ-A7RI-01	3.17954	1.1184	-3.3076	-2.7274	-0.4131	4.9156	-4.2934	6.642	3.5875	-9.9658	-3.3076	-1.9942	-9.9658	-9.9658	-5.5735	-0.4521	-1.4699	-1.0559	4.6583	-1.3548	4.8625	7.2759	6.0646	-1.5951	-1.7809	4.6035	5.5367	0.5955	0.3573	-2.5479	1.3679	-4.6082	-9.9658	-4.2934	5.7189	-2.0529	-3.6259	3.6748	8.7357	2.3337	-6.5064	0.8961	-2.9324	-5.0116	-9.9658	-3.458	-0.4719	-9.9658
GBMLGG	TCGA-TM-A7CA-01	3.10267	2.0218	-3.1714	-3.6259	-0.9132	5.254	-9.9658	7.2385	3.0654	-9.9658	-0.5543	-3.1714	-9.9658	-9.9658	-9.9658	0.2881	-5.0116	-9.9658	4.7709	-3.0469	3.4778	7.0046	5.6085	-2.5479	-3.6259	3.3134	3.1733	-0.8863	-0.9971	-4.035	1.2209	-5.5735	-9.9658	-5.5735	5.5479	-3.0469	-4.035	3.3925	8.8689	0.4967	-9.9658	1.105	-9.9658	-5.0116	-9.9658	-2.9324	0.044	-9.9658
GBMLGG	TCGA-QH-A86X-01	3.31322	1.46	-3.816	-5.0116	-0.5332	5.0005	-1.3921	7.1081	1.9859	-4.6082	-1.0559	-2.9324	-9.9658	-9.9658	-6.5064	1.3567	-2.7274	-1.2828	4.2343	-1.3921	4.3896	7.2451	4.7846	-2.3147	-1.4699	3.8461	3.835	1.4808	-0.9406	-3.816	0.6145	-4.035	-5.0116	-6.5064	6.0607	-1.9379	-4.6082	3.2297	8.9933	1.177	-5.0116	-0.3383	-9.9658	-9.9658	-9.9658	-3.1714	2.0742	-9.9658
GBMLGG	TCGA-DU-A76R-01	3.44628	0.605	-0.4325	-2.6349	0.7664	4.0304	-2.4659	6.2646	2.3451	-9.9658	-3.3076	-3.1714	-3.0469	-9.9658	-5.5735	-0.9686	-6.5064	-4.6082	4.2119	3.3577	4.5904	7.2442	6.3597	-2.7274	-1.8314	3.8827	3.8818	-0.2845	-1.0862	-5.5735	1.2271	-9.9658	-9.9658	-9.9658	5.745	-0.7588	-2.2447	2.8681	8.4827	2.1509	-9.9658	0.0718	-3.0469	-5.0116	-9.9658	-2.3884	-0.1031	-9.9658
GBMLGG	TCGA-DH-5144-01	3.22957	1.4808	-9.9658	-4.035	-1.1811	5.0674	-3.3076	5.9837	2.4908	-9.9658	-1.9942	-5.5735	-9.9658	-9.9658	-9.9658	-0.3022	-5.5735	-0.9406	2.9637	-1.9942	4.0636	6.339	4.3421	-3.3076	-0.8599	3.7259	4.4983	0.8488	-1.685	-4.035	0.8883	-6.5064	-9.9658	-5.0116	5.9081	-1.7322	-2.7274	3.2511	9.0533	2.296	-9.9658	-0.2671	-9.9658	-9.9658	-9.9658	-3.816	2.1957	-9.9658
GBMLGG	TCGA-41-5651-01	4.44952	1.8242	-2.8262	-4.6082	-1.8314	5.3245	-3.1714	5.0401	3.1129	-1.9942	-1.2481	-2.6349	-9.9658	-9.9658	-9.9658	-0.7108	-1.6394	-1.0559	4.041	-5.0116	8.4209	6.7638	4.5503	-1.0559	0.6608	3.8954	3.8249	1.5165	-1.4699	-3.458	2.3135	-5.0116	-2.114	-3.6259	5.2438	1.1316	-0.8863	3.7571	9.2159	3.7432	-5.5735	1.7009	-9.9658	-9.9658	-4.6082	-2.5479	1.105	-9.9658
GBMLGG	TCGA-E1-A7Z2-01	3.83797	0.7233	-1.9379	-9.9658	-0.8339	4.7181	-2.2447	5.0427	2.5804	-9.9658	-1.5522	-1.7809	-9.9658	-9.9658	-9.9658	-0.3383	-3.0469	-9.9658	3.832	-4.6082	4.0722	7.0789	7.1996	-3.1714	-9.9658	1.934	2.3843	-2.5479	-0.6643	-9.9658	3.7006	-9.9658	-9.9658	-3.6259	4.852	-1.4305	-3.3076	2.3704	8.408	0.5955	-9.9658	0.8805	-9.9658	-3.6259	-9.9658	-1.2828	0.6969	-9.9658
GBMLGG	TCGA-DU-A5TP-01	2.75913	1.3956	-3.458	-4.035	3.1261	6.2902	-2.7274	4.8274	5.6479	-0.2498	1.6964	-2.9324	-9.9658	-9.9658	-5.5735	0.9115	-0.8863	-0.0425	5.6882	-1.0262	6.8595	6.5583	6.08	-3.3076	1.0079	4.0497	4.1515	1.7273	-0.9406	-3.458	3.0305	-3.1714	-9.9658	-0.9971	4.1044	1.5216	-1.5105	3.8147	8.8217	4.6183	-4.2934	3.8239	-9.9658	-9.9658	-9.9658	1.1706	4.9964	-9.9658
GBMLGG	TCGA-06-0210-01	2.62994	0.3685	0.03	-2.8262	1.8404	7.3316	-1.7809	4.5964	5.17	-1.7809	0.434	-2.5479	-3.1714	-9.9658	-9.9658	-0.5543	-1.9942	-0.8084	5.6725	-2.1779	10.4933	7.752	5.634	-4.2934	1.0847	4.1604	4.9317	2.0776	-0.6643	-3.458	2.9784	-2.7274	0.7748	-0.4521	4.1343	1.5266	-1.2481	3.7259	8.1926	4.429	-3.6259	1.4011	-9.9658	-9.9658	-9.9658	2.0147	3.9838	-4.035
GBMLGG	TCGA-FG-8187-01	2.74414	0.9419	-3.0469	-3.816	0.0718	4.2743	-2.3884	6.6848	3.2112	-9.9658	-1.6394	-3.3076	-9.9658	-9.9658	-9.9658	-2.114	-4.035	-5.0116	3.8023	1.4547	4.3162	6.9727	6.3595	-2.3147	-1.6394	3.2959	4.2847	0.2277	-1.8314	-6.5064	1.614	-9.9658	-4.6082	-4.6082	5.275	1.6649	-2.9324	3.3017	8.7466	1.9564	-5.5735	3.345	-9.9658	-9.9658	-9.9658	0.5955	5.8578	-9.9658
GBMLGG	TCGA-E1-5304-01	5.17554	1.105	-9.9658	-4.035	-3.816	6.8468	-5.0116	6.4222	1.9188	-9.9658	-4.6082	-9.9658	-9.9658	-9.9658	-9.9658	-0.4921	-2.4659	-2.4659	3.1829	-4.2934	3.9571	7.0751	4.2921	2.0776	-3.816	4.2274	4.3992	-0.7588	-1.7322	-9.9658	0.2154	-9.9658	-9.9658	-6.5064	5.0387	-0.5973	-0.0877	2.9966	9.6271	0.1388	-9.9658	-0.4719	-9.9658	-9.9658	-9.9658	-3.6259	-0.9406	-9.9658
GBMLGG	TCGA-CS-4943-01	4.35263	1.1833	-5.0116	-6.5064	-1.3548	5.3392	-4.035	7.322	3.7116	-2.5479	-1.0559	-9.9658	-9.9658	-9.9658	-9.9658	-1.2481	-2.8262	-1.9942	4.4588	-4.2934	3.8591	6.7493	5.703	-1.8314	-1.0862	2.4727	2.9338	0.2522	-1.7322	-4.035	2.0289	-6.5064	-5.0116	-3.3076	5.4912	-0.4521	-1.4699	3.2282	9.2745	1.7316	-6.5064	0.3796	-9.9658	-9.9658	-9.9658	-0.4719	3.5718	-9.9658
GBMLGG	TCGA-19-5960-01	4.67073	1.3791	-9.9658	-2.5479	1.9712	6.9576	-0.8084	6.8914	3.2944	-2.3147	-2.6349	-1.7809	-1.2828	-5.0116	-9.9658	0.547	-1.0262	-0.2671	3.7324	-0.6873	4.6	5.9062	5.3331	-3.1714	0.4016	3.9412	4.5349	1.9073	-0.394	-3.0469	0.9343	-3.3076	-3.458	-1.2142	4.4496	2.3193	0.7493	3.2158	9.274	1.934	-2.4659	1.9034	-9.9658	-9.9658	-3.3076	-1.9379	2.3704	-9.9658
GBMLGG	TCGA-06-0686-01	4.25475	1.5563	-1.9942	-3.1714	-1.0559	6.606	-2.8262	5.4676	3.8551	-2.3884	-0.8599	-9.9658	-9.9658	-9.9658	-9.9658	0.547	-0.6193	-0.0277	5.7431	-3.458	9.1749	7.5042	5.4983	-0.0574	-0.6873	3.5287	4.1103	1.2756	-1.3548	-2.3147	3.3577	-9.9658	-0.9686	-0.5125	4.7677	1.5064	-1.2828	4.1539	8.8478	4.1128	-5.0116	1.5998	-9.9658	-9.9658	-3.0469	-1.3183	2.791	-9.9658
GBMLGG	TCGA-DH-5140-01	4.61946	1.6045	-2.0529	-3.458	0.03	6.2821	-2.3147	6.2333	3.0671	-1.685	-1.4305	-4.2934	-9.9658	-9.9658	-5.5735	-0.7834	-3.0469	-1.5105	4.6899	-3.816	4.2593	7.0731	5.9586	-1.9942	0.1257	4.3456	4.1724	2.0673	-1.685	-3.3076	1.7828	-3.458	-4.6082	-4.2934	4.853	1.4756	-0.3022	3.1491	9.4065	2.3508	-5.0116	0.2277	-9.9658	-9.9658	-9.9658	-2.5479	1.5013	-9.9658
GBMLGG	TCGA-TM-A7CF-01	2.27795	1.1897	-2.3147	-4.035	-0.6873	3.9617	-3.3076	6.5687	1.7141	-9.9658	-3.1714	-4.2934	-9.9658	-9.9658	-9.9658	-1.2481	-5.0116	-6.5064	3.6289	-6.5064	3.7992	6.8275	5.4486	-2.7274	-5.0116	2.3308	2.3732	-2.7274	-2.4659	-4.2934	1.0151	-9.9658	-9.9658	-9.9658	5.3893	-0.3022	-5.5735	2.5561	8.2356	0.1648	-9.9658	-0.1504	-9.9658	-5.0116	-9.9658	-1.5951	0.5955	-9.9658
GBMLGG	TCGA-DH-A7US-01	3.24486	2.081	-9.9658	-6.5064	-1.0559	5.0072	-5.5735	7.8333	2.874	-9.9658	-0.9132	-3.1714	-9.9658	-9.9658	-9.9658	-0.7834	-4.6082	-0.1345	4.6645	-0.1345	4.2743	7.3867	5.5258	-1.685	-2.7274	4.3625	4.1269	0.4447	0.1124	-4.6082	2.0638	-9.9658	-9.9658	-6.5064	6.8387	0.7321	-4.6082	3.2174	8.8987	1.8879	-5.5735	3.2511	-9.9658	-5.0116	-9.9658	-1.9942	0.1903	-9.9658
GBMLGG	TCGA-HT-A61B-01	3.17634	2.0742	-4.2934	-1.3921	-0.7834	5.972	-1.9379	5.726	5.5702	-0.1993	0.4761	0.6425	-3.816	-9.9658	-9.9658	1.9226	-2.3147	-0.4719	5.516	-1.8314	4.1466	6.4386	7.4571	-1.4699	0.4967	4.1119	4.8744	1.6512	-1.4305	-2.6349	3.0411	-3.816	-3.1714	-1.4699	5.0229	2.8877	-1.9379	3.835	8.5059	2.6464	-5.5735	0.8568	-9.9658	-9.9658	-9.9658	-1.3548	3.4843	-9.9658
GBMLGG	TCGA-E1-A7Z6-01	2.76768	1.3511	-2.0529	-1.685	0.8883	4.2987	-5.0116	7.9846	3.1733	-9.9658	-1.4305	-5.5735	-9.9658	-9.9658	-9.9658	-1.5522	-5.5735	-6.5064	5.1696	-3.458	3.1442	7.5103	6.4596	-4.2934	-2.5479	3.3119	4.2343	-1.1811	-1.7809	-6.5064	2.4035	-9.9658	-9.9658	-5.5735	5.62	-1.5522	-4.2934	3.1028	8.7019	3.1701	-9.9658	0.0854	-4.2934	-9.9658	-9.9658	-4.035	0.2154	-9.9658
GBMLGG	TCGA-HT-7857-01	2.65537	2.3366	-5.5735	-0.4325	3.6219	6.4697	-0.394	3.7773	6.1781	0.3685	3.0393	-1.7322	-9.9658	-9.9658	-5.5735	1.2394	0.0158	1.3846	6.7038	-0.3201	5.2623	7.5544	7.1083	-3.458	2.8582	4.5934	5.4784	4.5392	1.8444	-0.1504	4.1636	0.4552	-1.2828	-0.9686	5.1946	5.1293	3.5547	5.3632	8.0867	6.779	-0.8084	2.7551	-9.9658	-9.9658	-2.3147	2.3479	6.7601	-9.9658
GBMLGG	TCGA-E1-5319-01	2.9982	1.6875	-5.5735	-4.035	-0.9406	4.2721	-3.816	5.7885	2.3337	-2.6349	-1.5105	-3.458	-9.9658	-9.9658	-9.9658	-1.8836	-3.1714	-0.5973	3.6219	-1.2142	3.4984	6.9756	6.5311	-3.0469	-0.3383	3.7072	5.0095	1.4335	-0.3383	-0.5973	1.6093	-5.5735	-3.1714	-9.9658	4.905	-0.2328	-0.7108	3.0619	8.6354	1.7403	-5.0116	0.8568	-9.9658	-9.9658	-9.9658	-6.5064	-2.1779	-9.9658
GBMLGG	TCGA-DU-A5TS-01	1.85997	1.9675	-9.9658	-3.3076	-1.5105	4.1343	-2.7274	6.466	3.0323	-9.9658	-5.5735	-3.458	-9.9658	-9.9658	-9.9658	0.537	-9.9658	-9.9658	4.9256	-2.8262	3.6703	7.462	5.8548	-2.3884	-3.1714	2.4597	3.0074	-0.4921	-1.8314	-6.5064	1.2875	-9.9658	-9.9658	-9.9658	5.3882	-3.816	-5.0116	3.2359	8.3442	0.7748	-9.9658	2.6579	-9.9658	-5.0116	-9.9658	-2.9324	-1.9942	-9.9658
GBMLGG	TCGA-DU-6392-01	3.49058	1.3397	-2.6349	-2.7274	-1.1488	6.5802	-1.2828	4.6611	4.2699	-1.8836	-1.0862	-3.816	-9.9658	-4.6082	-3.816	0.0158	-0.8599	-1.5951	4.8033	-2.1779	5.889	7.3737	6.2932	-1.3183	-0.0725	5.2536	4.9644	2.0289	-0.3566	-3.0469	3.5754	-3.3076	-5.0116	-2.5479	5.9317	0.9568	0.0854	3.9774	8.8359	3.6018	-4.035	1.5115	-9.9658	-9.9658	-9.9658	-1.7322	2.8522	-9.9658
GBMLGG	TCGA-QH-A6CU-01	2.10772	0.4967	-2.3884	-5.0116	-1.2142	4.6154	-3.0469	6.5883	3.5791	-9.9658	-3.816	-5.5735	-9.9658	-9.9658	-9.9658	-0.9971	-1.5951	-6.5064	4.6439	1.9749	3.5337	7.9785	6.8469	-4.6082	-0.7834	2.4171	4.3931	0.8883	-2.3147	-4.2934	2.5087	-9.9658	-9.9658	-9.9658	5.1388	1.177	-2.6349	2.7422	8.4757	3.1079	-6.5064	1.5465	-9.9658	-9.9658	-9.9658	-1.5105	1.9675	-9.9658
GBMLGG	TCGA-DU-6404-01	3.37154	2.2237	-3.6259	-6.5064	-1.0559	6.3243	-1.5105	6.7219	3.1327	-0.2671	-2.3884	-4.035	-9.9658	-4.6082	-9.9658	-0.1345	-2.4659	-1.5951	6.1753	0.4447	7.7233	6.7162	5.8605	-4.2934	0.2522	3.8798	5.5889	2.108	-0.6416	-4.6082	1.4174	-3.1714	4.7258	-4.2934	4.2548	2.9618	2.1957	4.3299	9.1121	4.943	-4.035	1.7053	-9.9658	-9.9658	-9.9658	-1.0262	3.0876	-9.9658
GBMLGG	TCGA-VW-A8FI-01	3.57409	1.6695	-2.114	-3.816	0.5763	5.2567	-1.5105	7.3123	3.906	-0.4325	-2.0529	-2.4659	-3.0469	-9.9658	-9.9658	1.3167	-1.0862	-2.5479	4.8949	-1.8836	4.4556	7.7751	3.832	-2.8262	-0.1345	4.0523	3.991	2.7095	-0.5756	-3.816	1.0151	-2.5479	-1.8836	-2.8262	4.4523	4.1302	0.605	2.77	8.8038	0.8961	-4.035	2.0465	-9.9658	-9.9658	-9.9658	-1.2142	2.0844	-9.9658
GBMLGG	TCGA-HT-A74L-01	3.46464	0.9493	-3.0469	-2.9324	-0.0725	4.783	-3.816	6.5	3.3842	-4.2934	-2.6349	-2.9324	-9.9658	-9.9658	-9.9658	-1.1488	-3.1714	-6.5064	4.4945	-2.2447	5.2111	6.681	6.416	-0.0725	-5.0116	4.1474	4.2103	-0.9132	-1.4699	-5.0116	1.0079	-9.9658	-2.9324	-5.5735	4.1318	-2.3884	-2.9324	3.5596	9.238	1.2333	-9.9658	0.3796	-9.9658	-9.9658	-9.9658	-1.2142	1.1382	-9.9658
GBMLGG	TCGA-P5-A5EU-01	4.31756	2.0111	-2.4659	-2.2447	2.0979	7.5406	-3.1714	7.5601	4.5559	4.673	0.8805	-2.2447	-9.9658	-4.6082	-3.816	-0.2159	-1.5951	-0.9406	5.1752	-1.0559	8.7558	7.6089	5.1954	-0.8084	1.4808	5.5829	6.4973	1.2815	-0.5973	-2.1779	2.8055	-3.816	-4.6082	-1.0559	5.4343	5.7331	0.4447	4.178	8.3908	5.5223	-5.5735	1.9895	-9.9658	-9.9658	-5.0116	2.5363	4.466	-9.9658
GBMLGG	TCGA-P5-A5EZ-01	2.42226	1.3109	-2.7274	-2.4659	-0.8339	4.6554	-3.0469	5.8841	3.4237	-6.5064	-0.0877	-2.9324	-9.9658	-9.9658	-9.9658	0.4125	-1.5951	-0.4521	4.4556	-1.3921	4.5173	7.0232	5.4689	-0.4131	2.1509	3.0074	4.001	3.838	-0.0425	-1.4699	1.8604	-2.2447	-4.035	-5.5735	4.6781	0.7058	-0.8599	3.1245	8.1285	1.674	-2.7274	1.9564	-9.9658	-9.9658	-9.9658	-1.2828	1.2271	-9.9658
GBMLGG	TCGA-S9-A89Z-01	3.37298	2.0111	-5.5735	-2.5479	-0.0877	6.8501	-1.8314	3.7804	4.5123	-0.2845	1.7575	-1.1488	-9.9658	-9.9658	-3.1714	2.0742	-2.7274	-0.8863	6.086	-2.0529	4.3618	7.8698	6.613	-0.3383	1.2992	3.9654	4.4101	2.8936	-0.2328	-2.2447	2.5536	-3.6259	-2.9324	-1.7809	4.7115	2.4805	-0.1504	3.9137	8.4353	3.4451	-4.6082	1.614	-9.9658	-9.9658	-9.9658	-1.1811	1.6604	-9.9658
GBMLGG	TCGA-S9-A6TZ-01	2.82169	1.5415	-2.3147	-1.2142	0.1257	4.958	-2.3884	6.194	3.6939	-1.6394	-0.5756	-4.035	-9.9658	-6.5064	-6.5064	-0.8084	-2.2447	-1.0862	4.6404	-2.9324	4.3068	7.2441	6.6934	-1.9942	-0.7108	3.5596	3.795	0.9789	-0.6643	-3.6259	2.0111	-3.6259	-5.0116	-5.0116	4.917	1.9822	-2.3147	3.945	8.682	2.1957	-6.5064	0.2522	-9.9658	-9.9658	-9.9658	-1.8836	2.727	-9.9658
GBMLGG	TCGA-FG-5963-01	3.77298	1.6875	-4.6082	-2.0529	0.9038	6.5281	-0.6873	5.2694	5.7049	-0.0725	-0.5756	-5.5735	-9.9658	-5.5735	-5.5735	0.7233	-0.1031	1.0433	5.6868	-0.9686	4.7783	7.3773	6.5359	-1.8836	2.0076	3.9654	4.0488	4.3999	1.7489	-1.2142	3.4318	-1.5951	-3.0469	-1.5105	4.6977	3.1829	2.036	4.309	8.0264	3.7529	-2.0529	3.9856	-9.9658	-5.5735	-5.5735	-1.5951	0.4016	-9.9658
GBMLGG	TCGA-HT-A61A-01	2.65537	1.3846	-1.4305	-4.2934	-1.2828	3.8431	-2.8262	5.465	2.5011	-9.9658	-5.5735	-3.3076	-9.9658	-5.5735	-9.9658	-0.9971	-4.6082	-6.5064	3.5633	-2.6349	4.1899	6.5435	5.709	-3.3076	-1.4699	2.4908	2.5876	-0.0574	-1.7322	-5.0116	1.595	-4.6082	-2.5479	-5.5735	6.7002	-5.0116	-5.5735	2.9394	8.0438	0.4552	-9.9658	2.3135	-9.9658	-3.816	-9.9658	-2.1779	-1.0559	-9.9658
GBMLGG	TCGA-S9-A89V-01	2.39506	2.1862	-1.1811	-4.035	1.6604	5.1248	-1.4305	5.7963	3.865	-5.5735	0.044	-3.6259	-9.9658	-9.9658	-9.9658	-0.1031	-2.0529	-2.7274	6.0936	-3.3076	4.9265	7.3554	6.1667	-3.458	-0.0574	4.6282	4.439	1.7097	-0.9686	-4.035	2.6067	-2.8262	-2.9324	-5.5735	4.4894	-0.6873	-2.5479	4.018	8.8203	2.4597	-4.6082	2.0638	-9.9658	-9.9658	-9.9658	0.5271	4.1194	-9.9658
GBMLGG	TCGA-DB-A64W-01	4.41481	1.4704	-2.8262	-9.9658	-0.6416	5.3737	-3.0469	4.3068	1.334	-9.9658	-5.5735	-1.0559	-9.9658	-9.9658	-9.9658	0.4761	-5.5735	-9.9658	2.4439	-6.5064	5.0661	6.6221	4.3541	0.2762	-9.9658	2.9966	1.8957	-3.816	-1.6394	-9.9658	0.7321	-9.9658	-9.9658	-9.9658	5.5955	-3.816	-5.0116	3.3105	9.4393	1.0503	-9.9658	0.4552	-3.1714	-9.9658	-9.9658	-3.458	-0.2159	-9.9658
GBMLGG	TCGA-FG-A4MX-01	1.9449	2.409	-3.816	-3.458	-2.5479	4.5832	-4.6082	5.2025	2.0878	-9.9658	-9.9658	-0.8084	-9.9658	-9.9658	-9.9658	0.24	-2.2447	-4.035	3.2632	-2.9324	4.5687	7.1855	3.7248	-0.4131	-9.9658	2.9224	3.3966	-2.114	-4.6082	-9.9658	1.3511	-9.9658	-9.9658	-4.035	4.441	-2.0529	-2.5479	2.7227	8.4613	1.7446	-9.9658	-0.6873	-9.9658	-9.9658	-9.9658	-1.3921	1.614	-9.9658
GBMLGG	TCGA-P5-A72Z-01	3.50335	2.4359	-9.9658	-6.5064	-1.5105	5.2925	-4.035	1.6187	0.346	-4.2934	-5.0116	-2.8262	-2.5479	-5.0116	-9.9658	-0.8084	-6.5064	-2.3147	3.1195	-5.5735	5.3491	6.8625	3.2143	-1.1811	-1.9942	3.8531	4.1302	-0.8599	-1.2481	-6.5064	0.2762	-9.9658	-9.9658	-4.6082	5.1914	-2.4659	-2.5479	2.8076	8.9098	1.1577	-9.9658	0.2881	-9.9658	-9.9658	-9.9658	-4.035	-0.3383	-9.9658
GBMLGG	TCGA-HT-8114-01	2.63689	1.6604	-1.685	-0.9686	0.9642	4.9031	-1.685	7.054	4.2335	-0.2845	0.2762	-2.4659	-9.9658	-9.9658	-2.7274	-0.4521	-2.3147	-1.1811	5.1086	-2.1779	3.9031	6.4207	7.0318	-1.3921	1.3283	4.6877	6.1912	2.1411	-0.6873	-4.035	2.1213	-3.816	-3.816	-2.8262	6.1865	2.9655	-0.6416	4.1748	8.8468	2.0004	-4.2934	0.5568	-5.0116	-5.5735	-9.9658	-0.6873	4.5589	-9.9658
GBMLGG	TCGA-06-2563-01	3.89825	2.5313	-0.7346	-1.9942	2.3649	7.3292	-1.2481	6.2802	4.2103	2.7805	-0.1504	-1.9942	-2.1779	-9.9658	-3.1714	-0.1187	-2.114	-0.3201	5.4845	-1.3548	7.2495	7.5403	4.8294	-4.035	1.6093	5.0955	5.6622	2.6533	-0.8339	-2.3884	3.6474	-2.7274	-2.9324	-2.1779	5.1599	6.7657	2.9167	4.9426	8.8303	4.1788	-4.2934	1.7995	-9.9658	-9.9658	-3.0469	0.2277	2.9655	-9.9658
GBMLGG	TCGA-15-1444-01	3.7463	1.6875	-2.114	-0.6416	1.2516	5.7788	-2.3884	8.2659	5.5886	-2.5479	1.0779	-2.3147	-9.9658	-5.0116	-9.9658	0.4125	-2.1779	-1.9379	5.8194	-2.7274	5.0939	7.7237	6.8841	-0.9971	-0.7588	4.9113	5.5198	1.6604	-1.2828	-3.1714	2.5462	-3.3076	-3.0469	-0.6873	4.9519	2.1213	-1.1488	5.0308	8.472	2.6441	-6.5064	2.3508	-9.9658	-9.9658	-9.9658	1.3623	5.4064	-9.9658
GBMLGG	TCGA-32-4213-01	2.46989	0.24	-3.6259	-5.5735	-1.0262	5.5497	-3.1714	3.5035	3.162	1.1316	-0.2845	-5.5735	-1.4305	-9.9658	-9.9658	-1.2481	-3.6259	-1.2481	4.3917	-2.8262	5.1086	6.0348	4.9346	-4.2934	0.4016	3.3506	4.0445	2.2299	-0.3201	-2.9324	2.7336	-3.3076	-1.0559	-2.3884	3.8095	5.5895	2.7763	3.5312	6.7944	2.6019	-3.816	1.2516	-9.9658	-9.9658	-3.6259	-2.9324	0.0854	-9.9658
GBMLGG	TCGA-HT-7881-01	2.78245	1.3567	-2.3884	-4.2934	0.2277	3.8167	-3.816	6.898	1.8282	-5.0116	-5.5735	-5.0116	-9.9658	-5.5735	-5.5735	-2.0529	-4.2934	-3.6259	3.1162	-2.0529	4.3385	6.5275	5.7447	-3.3076	-2.8262	3.2826	4.2495	0.9115	-0.7346	-5.5735	1.2147	-3.6259	-5.0116	-9.9658	6.6498	-2.3884	-1.8314	2.9109	8.2436	0.2029	-6.5064	3.1604	-9.9658	-5.5735	-9.9658	-2.9324	0.7916	-9.9658
GBMLGG	TCGA-15-0742-01	4.01971	1.2516	-2.4659	-6.5064	0.7579	7.1381	-1.9942	4.3751	2.9319	-1.7322	-1.2481	-1.7809	-1.1488	-5.5735	-5.5735	0.5069	-2.3147	-1.8314	5.0837	-3.6259	8.4939	8.2411	4.1547	-3.458	-0.8084	3.9356	3.4264	1.3901	-0.8084	-4.035	2.4701	-5.5735	-3.458	-3.1714	5.4087	2.6693	-1.2481	3.5461	8.2471	3.3364	-9.9658	1.8879	-3.458	-9.9658	-9.9658	-2.2447	1.196	-9.9658
GBMLGG	TCGA-CS-4944-01	2.17954	1.0222	-5.5735	-9.9658	-0.1828	4.5862	-3.816	5.6693	2.8661	-9.9658	-0.5756	-9.9658	-9.9658	-9.9658	-9.9658	-3.0469	-2.9324	-2.9324	4.6725	-3.6259	2.9262	7.6806	6.6187	-4.6082	-0.9406	2.1894	3.0323	2.1606	-1.2142	-9.9658	1.2455	-9.9658	-9.9658	-9.9658	4.891	-2.3884	-5.5735	2.3451	8.3924	2.5137	-6.5064	-0.3752	-9.9658	-9.9658	-9.9658	-3.3076	-0.8863	-9.9658
GBMLGG	TCGA-06-0187-01	3.64387	1.7141	-2.2447	-2.2447	1.2209	6.9452	-2.3147	6.569	4.2465	-1.0262	0.4552	-3.3076	-0.2498	-5.5735	-4.6082	-0.9132	-2.9324	-1.5951	5.3699	-3.3076	8.7434	7.5336	5.8822	-3.6259	-0.2498	4.9621	5.7843	2.8137	-2.6349	-1.685	2.5731	-5.5735	-0.8339	-1.0559	6.1991	5.1268	-0.6193	4.4509	8.1676	5.825	-9.9658	0.9642	-9.9658	-9.9658	-4.035	1.5902	5.2631	-9.9658
GBMLGG	TCGA-19-1390-01	5.22691	1.8604	-1.2828	-4.2934	-0.1828	6.5378	-2.4659	6.2213	3.7699	-1.0862	-1.5522	-3.816	-9.9658	-9.9658	-9.9658	1.0642	-2.2447	-1.4305	4.5596	-3.816	10.7382	7.1435	4.6433	-1.5105	-3.458	4.7121	4.8329	0.058	-1.3183	-1.3183	1.2455	-5.5735	1.7575	-1.6394	5.1132	3.6148	0.1519	2.9469	9.5852	3.6983	-5.0116	1.9226	-9.9658	-5.0116	-2.4659	-0.9686	3.1145	-9.9658
GBMLGG	TCGA-S9-A7QX-01	2.71145	1.2023	-4.6082	-4.2934	-0.9132	4.1302	-3.816	6.0255	3.8147	-9.9658	-3.3076	-2.5479	-9.9658	-9.9658	-9.9658	-0.3752	-4.2934	-3.6259	5.064	-3.0469	3.5022	7.0297	6.3475	-1.3921	-5.0116	3.4129	4.4476	-1.3921	-1.4699	-5.5735	1.6093	-9.9658	-9.9658	-3.458	5.1796	-5.5735	-6.5064	3.7017	8.4191	0.7999	-6.5064	1.7995	-9.9658	-9.9658	-9.9658	-2.9324	1.0915	-9.9658
GBMLGG	TCGA-DU-A7TG-01	2.74203	2.0076	-0.4131	-4.2934	0.099	3.9992	-2.5479	5.4611	2.6738	-9.9658	-3.816	-4.035	-3.6259	-4.6082	-5.0116	-1.4305	-4.2934	-5.0116	4.0445	-2.6349	3.7898	6.839	6.0995	-3.3076	-2.8262	2.8301	3.0393	0.2154	-2.3147	-3.816	2.1894	-5.5735	-9.9658	-4.6082	6.0706	-0.0574	-4.6082	2.9893	7.9742	2.5313	-5.0116	1.0222	-9.9658	-9.9658	-9.9658	0.24	5.8445	-9.9658
GBMLGG	TCGA-DU-5874-01	4.09849	2.7889	-2.5479	-6.5064	-1.1811	5.6448	-1.2481	5.8179	1.2455	-4.035	-2.7274	-3.6259	-9.9658	-9.9658	-4.6082	0.1776	-6.5064	-2.1779	3.1523	-2.2447	5.7939	6.2646	4.4836	-0.9686	-1.8836	3.9127	3.9403	0.1903	-0.8863	-4.6082	1.1184	-6.5064	-3.458	-5.5735	5.2177	-2.2447	-2.6349	3.0446	9.097	2.004	-5.5735	-0.3201	-9.9658	-9.9658	-9.9658	-3.6259	-1.1811	-9.9658
GBMLGG	TCGA-TQ-A8XE-01	3.08069	0.9191	-3.3076	-4.035	-0.9132	5.2338	-4.035	5.753	3.0145	-9.9658	-3.816	-2.2447	-2.3884	-9.9658	-9.9658	-1.0862	-3.458	-4.035	4.84	-4.035	3.7356	7.3053	5.5286	-0.8599	-3.3076	3.87	4.3039	0.058	-0.9686	-4.6082	1.0983	-5.5735	-2.114	-3.458	4.854	-4.2934	-4.6082	3.2034	8.5349	1.0433	-9.9658	1.5064	-9.9658	-9.9658	-9.9658	-1.9379	4.2646	-5.0116
GBMLGG	TCGA-DU-7300-01	3.14083	1.2516	-3.6259	-4.035	0.0854	4.7613	-4.035	6.6017	3.1491	-3.6259	-1.8314	-2.7274	-9.9658	-9.9658	-9.9658	-0.7588	-2.3884	-0.8084	3.0791	-2.3147	3.8451	6.4142	5.2415	-2.3147	0.8961	3.2662	4.0118	2.6624	-1.0559	-2.0529	1.7185	-2.8262	-0.1031	-3.6259	6.2485	0.9862	-0.4521	3.1733	8.6147	2.7931	-4.6082	1.5806	-9.9658	-9.9658	-4.6082	-3.816	0.1388	-9.9658
GBMLGG	TCGA-HT-7694-01	3.11265	1.2271	-1.685	-3.816	0.4016	4.0198	-4.035	5.8334	1.8564	-9.9658	-4.2934	-3.0469	-9.9658	-9.9658	-9.9658	-0.5756	-5.5735	-4.035	2.7993	-2.1779	3.9682	6.544	6.2878	-3.458	-2.5479	3.4464	3.644	-0.4921	-1.8836	-5.5735	1.2333	-5.5735	-9.9658	-9.9658	5.8189	-3.0469	-5.0116	2.685	8.5423	0.8647	-9.9658	2.6487	-9.9658	-4.2934	-9.9658	-2.5479	0.8488	-9.9658
GBMLGG	TCGA-HT-7471-01	4.15788	2.118	-1.9379	-2.7274	0.6332	5.3385	-1.4699	6.5564	3.8269	-0.4131	0.9789	-1.8314	-9.9658	-5.5735	-9.9658	0.8805	-3.1714	-0.1665	4.3827	-0.9686	4.865	6.6768	5.8322	-2.3147	0.5271	5.5644	6.0798	1.9859	0.0854	-0.9406	3.1212	-5.5735	-4.6082	-2.1779	5.7759	3.5911	1.4065	3.7888	8.769	2.6441	-4.2934	0.0718	-9.9658	-9.9658	-9.9658	-2.3147	1.1184	-9.9658
GBMLGG	TCGA-DB-A4XD-01	3.12266	1.4859	-5.0116	-3.458	-1.0559	5.0981	-9.9658	7.9879	3.3119	-5.0116	-2.5479	-2.1779	-9.9658	-9.9658	-9.9658	-0.6643	-4.6082	-4.2934	4.7882	-3.458	4.182	6.6717	6.5162	-1.5522	-4.2934	2.8137	3.4143	-1.6394	-1.3183	-5.5735	0.8568	-5.5735	-9.9658	-6.5064	5.3277	-2.2447	-1.6394	3.6113	8.8942	0.8647	-9.9658	0.058	-9.9658	-9.9658	-5.0116	-3.816	0.1903	-9.9658
GBMLGG	TCGA-TQ-A7RK-01	3.23109	2.5996	-2.9324	-2.3884	-0.4131	5.2223	-3.458	6.5309	2.9637	-9.9658	-3.816	-1.7322	-3.3076	-9.9658	-9.9658	-0.0725	-4.6082	-5.5735	4.7971	-2.1779	3.4411	7.1761	5.4377	-1.5105	-9.9658	3.055	3.5449	-1.2142	-1.1488	-6.5064	0.9716	-9.9658	-9.9658	-9.9658	5.4226	-0.9686	-3.458	2.8916	8.6765	1.8879	-9.9658	0.6969	-9.9658	-9.9658	-5.5735	-3.6259	-0.5125	-9.9658
GBMLGG	TCGA-HT-7475-01	2.85196	2.1894	-1.8314	-4.6082	-1.3548	4.8615	-2.9324	5.9208	1.7532	-4.035	-3.458	-5.0116	-9.9658	-6.5064	-9.9658	-0.4921	-5.0116	-5.0116	2.7095	-4.2934	4.01	6.8753	5.3002	-2.8262	-3.6259	3.7625	3.6417	0.8246	-1.6394	-5.0116	1.2147	-3.816	-9.9658	-9.9658	5.101	-2.7274	-4.2934	3.1228	8.218	0.044	-9.9658	2.043	-9.9658	-5.5735	-9.9658	-3.6259	-1.2142	-9.9658
GBMLGG	TCGA-TQ-A7RO-01	3.86395	2.2421	-2.8262	-4.6082	-1.0862	4.9412	-2.9324	8.0979	3.1195	-1.7322	-0.9971	-3.3076	-9.9658	-5.5735	-9.9658	-0.3201	-1.5951	-2.0529	5.0418	-2.2447	5.9327	7.4914	5.1027	-1.0862	-0.1828	4.1086	3.7389	0.9716	0.058	-3.6259	0.0014	-4.6082	-9.9658	-5.0116	5.6311	0.346	-1.5105	3.8279	8.5867	2.0844	-5.0116	1.196	-9.9658	-9.9658	-9.9658	-2.4659	1.5366	-9.9658
GBMLGG	TCGA-HT-7902-01	2.93166	1.9302	-3.6259	-3.1714	-0.1665	4.7231	-2.0529	7.5319	3.208	-2.8262	-1.0559	-3.1714	-9.9658	-9.9658	-4.6082	-1.4305	-5.5735	-1.5522	4.5117	-3.1714	4.3031	7.0452	6.2327	-0.9971	-0.0877	4.3442	4.6059	1.2023	-1.1488	-3.816	2.1957	-5.0116	-4.035	-4.2934	5.7602	-0.5332	-2.4659	3.4034	8.5652	2.0742	-4.6082	4.7814	-9.9658	-2.7274	-5.5735	-2.5479	0.4967	-9.9658
GBMLGG	TCGA-FG-A711-01	3.16186	1.5316	-2.7274	-4.035	-0.9132	4.5988	-3.0469	7.3562	3.1685	-2.1779	-4.2934	-2.1779	-9.9658	-5.0116	-9.9658	-1.2481	-9.9658	-5.5735	4.9714	-4.035	3.3759	7.5122	6.8716	-1.8314	-3.1714	3.4661	4.0295	-2.3147	-1.685	-6.5064	1.1512	-5.0116	-9.9658	-6.5064	5.2445	-2.9324	-4.6082	3.3464	8.591	0.547	-5.5735	0.3115	-9.9658	-5.0116	-5.0116	-2.3147	2.043	-9.9658
GBMLGG	TCGA-06-2557-01	3.73123	1.8801	-2.3147	-0.7588	0.5069	6.29	0.099	6.5178	5.812	2.108	1.9264	-3.1714	-3.0469	-4.2934	-5.5735	1.8282	0.5955	2.8034	5.8863	0.4761	5.1859	7.6866	6.7107	-3.0469	3.3521	5.2972	5.597	4.5392	2.4306	-0.1665	3.8925	-0.5973	-0.394	-0.4921	4.3198	5.4539	3.506	4.9265	8.7457	4.1178	-0.7346	3.0056	-9.9658	-9.9658	-2.2447	-0.1031	3.5887	-9.9658
GBMLGG	TCGA-DB-5276-01	2.8156	1.7786	-3.3076	-0.9132	1.6695	5.7924	-2.7274	7.6757	4.7426	0.5763	-0.4131	-5.5735	-9.9658	-5.5735	-5.5735	-1.1172	-2.2447	-0.7834	4.9237	-1.9379	3.6623	7.212	6.5034	-1.5522	1.6327	4.3285	4.9801	3.1813	-0.3566	-2.1779	2.8321	-5.0116	-4.6082	-4.035	6.5441	0.6239	-0.394	4.3206	8.4788	4.096	-4.035	3.1844	-9.9658	-9.9658	-5.0116	2.8381	7.023	-9.9658
GBMLGG	TCGA-P5-A730-01	2.59929	1.9415	-5.5735	-3.3076	-1.0862	4.9265	-2.4659	3.5262	0.4552	-2.6349	-2.8262	-4.6082	-9.9658	-5.5735	-9.9658	-0.9686	-9.9658	-2.7274	3.3842	-4.6082	5.131	7.1544	4.8017	-1.6394	-0.6873	3.7919	3.9242	0.4016	-2.3147	-1.9942	1.2875	-5.5735	-4.6082	-4.6082	5.435	-0.9971	-1.0559	3.1112	8.8854	3.4687	-6.5064	0.8408	-9.9658	-9.9658	-9.9658	-2.114	-0.1993	-9.9658
GBMLGG	TCGA-E1-A7YD-01	4.34625	1.4652	-3.0469	-4.6082	-0.013	5.3785	-1.5522	6.5099	3.1653	-1.4305	-1.5522	-2.6349	-3.816	-9.9658	-5.5735	-0.4325	-2.2447	-2.3884	4.6634	1.7316	5.1744	7.4381	5.1989	-1.6394	0.099	4.5336	5.1815	1.9601	-0.5543	-4.035	1.125	-2.3884	-1.5522	-1.8314	3.8208	3.3047	-0.6193	3.4609	8.7083	1.683	-5.0116	0.2881	-9.9658	-9.9658	-3.0469	-2.0529	1.8484	-3.816
GBMLGG	TCGA-HT-A74O-01	2.44893	1.7229	-3.6259	-4.2934	-0.7346	5.6139	-2.7274	6.2659	4.2009	-1.9379	-1.0262	-1.8314	-9.9658	-9.9658	-9.9658	0.8082	-1.685	-0.9686	5.7148	-2.3147	2.7931	7.818	6.0334	-2.3147	1.0573	2.7679	4.2064	3.1278	0.3115	-3.816	1.8524	-3.6259	-3.458	-2.3884	5.2884	-0.1828	-1.8314	3.0808	8.8125	2.7847	-3.458	2.1541	-9.9658	-9.9658	-9.9658	-1.685	0.5069	-9.9658
GBMLGG	TCGA-HT-8015-01	3.26303	1.4911	-1.3548	-3.816	0.537	4.9566	-1.8314	6.2521	3.6737	-3.458	1.2085	-4.2934	-9.9658	-9.9658	-9.9658	-3.816	-3.1714	-2.2447	4.623	-2.0529	3.6691	7.1213	6.2173	-4.035	-0.6416	3.2143	2.7029	1.4335	-0.6193	-4.035	2.6161	-4.6082	-1.9942	-3.458	6.4783	-0.8084	-2.5479	3.2282	7.9656	2.8582	-5.0116	2.0946	-9.9658	-2.6349	-4.035	1.8363	6.2838	-9.9658
GBMLGG	TCGA-HT-A74J-01	2.77612	2.6962	-4.2934	-2.6349	-0.2845	4.892	-9.9658	6.9438	3.4251	-9.9658	-3.0469	-0.1345	-9.9658	-9.9658	-9.9658	-0.8599	-2.7274	-9.9658	4.9556	-3.6259	4.3456	7.2009	7.2957	-2.4659	-3.1714	3.8857	4.6793	-0.2845	-1.8836	-9.9658	1.1184	-5.5735	-9.9658	-9.9658	5.6608	-2.2447	-5.5735	3.1393	8.6076	1.8524	-9.9658	1.7702	-9.9658	-9.9658	-5.5735	-1.1172	3.7815	-9.9658
GBMLGG	TCGA-06-0878-01	3.62529	1.9452	-9.9658	-2.3884	1.642	7.8625	-0.7108	6.6671	5.0005	2.3423	0.2881	-1.685	-0.013	-9.9658	-9.9658	0.2642	-0.6873	-0.9686	5.72	-0.8599	9.904	7.4582	5.5053	-3.816	1.2209	4.8218	5.9656	4.2381	-0.9406	-0.5756	3.3717	-2.8262	0.5666	-1.5105	5.8138	4.8177	0.9568	4.4739	9.0342	6.6403	-2.9324	2.727	-9.9658	-9.9658	-9.9658	1.1897	5.8395	-9.9658
GBMLGG	TCGA-DH-A669-01	4.18509	1.2455	-9.9658	-6.5064	1.0151	5.3913	-0.8599	1.6875	3.2158	1.4911	0.4233	-2.6349	-9.9658	-5.5735	-9.9658	2.3732	-1.5105	0.4125	4.0532	-0.8599	4.8973	7.1251	4.5299	-0.8084	0.434	4.5161	4.7539	2.5437	0.4865	-1.5951	1.7532	-4.6082	-1.5522	-1.3921	5.9244	5.7203	1.4011	2.8542	8.8439	4.3306	-1.8314	2.3898	-9.9658	-9.9658	-4.035	-2.5479	2.1411	-9.9658
GBMLGG	TCGA-06-0129-01	4.5904	2.0742	-2.4659	-3.6259	1.642	6.1246	-0.013	6.193	5.9468	-1.1488	0.8805	0.7407	-9.9658	-9.9658	-9.9658	3.38	-1.5105	1.8996	5.8357	-2.1779	4.6577	7.0066	6.4575	0.2881	1.0573	6.0378	5.4741	1.8524	-0.1828	-2.6349	2.8076	-4.035	-3.458	0.6239	4.1804	4.6479	0.5666	4.8535	9.4055	3.1393	-1.9379	2.2051	-9.9658	-9.9658	-9.9658	0.9268	4.6525	-9.9658
GBMLGG	TCGA-HT-A617-01	2.88164	0.8488	-3.816	-0.9971	1.7828	5.1256	-1.3921	4.0558	4.1409	0.7999	-1.8314	-2.6349	-9.9658	-9.9658	-5.5735	-0.1345	-0.7108	0.688	4.9426	-0.6416	4.327	8.0817	5.4135	-3.458	2.4985	2.7401	3.4984	4.073	1.7403	-1.9942	2.9052	-2.2447	-1.3548	-4.035	4.9883	2.1734	1.8524	3.1892	7.7157	2.8137	-2.3884	1.4011	-9.9658	-9.9658	-9.9658	-2.2447	0.3796	-9.9658
GBMLGG	TCGA-16-1045-01	3.15706	1.7786	-1.4699	-0.8339	1.0983	6.3388	-0.6643	4.8885	5.6062	0.6517	3.1062	-9.9658	-9.9658	-4.035	-3.458	0.0014	-1.7322	0.5069	5.6496	-1.1172	8.546	7.3299	6.5836	-2.7274	2.1606	5.3165	6.24	3.1955	1.1117	-1.5522	3.7313	-1.7809	-0.8863	-1.5522	4.5832	3.695	2.9319	5.2664	8.1271	4.2196	-1.9942	3.8983	-9.9658	-9.9658	-4.6082	-0.7834	2.9052	-3.3076
GBMLGG	TCGA-06-2567-01	4.60641	1.7532	0.1776	0.03	1.9712	6.0943	-1.4699	5.7931	5.2843	0.9115	1.7403	-2.2447	-9.9658	-1.2481	-1.0862	-0.1187	-2.7274	0.0014	5.6708	-0.2328	7.3838	7.5787	6.4308	-1.9942	2.8422	5.0242	5.7159	3.9673	0.4016	-2.5479	4.2833	-2.9324	0.4967	-1.2828	4.551	5.6183	1.2085	4.6035	8.1933	4.3392	-3.3076	2.1476	-9.9658	-9.9658	-9.9658	1.8363	4.5454	-9.9658
GBMLGG	TCGA-32-2616-01	3.70156	1.196	-1.6394	-3.1714	1.5806	6.6165	-1.4699	5.0304	4.3068	-2.8262	0.3231	-3.6259	-3.3076	-5.5735	-9.9658	0.5271	-1.1488	0.9191	5.5823	0.1388	8.4176	8.3274	4.425	-1.3183	0.9038	4.3979	5.5874	2.4544	-0.2671	-1.4699	2.5388	-2.0529	-2.6349	-2.3147	4.7751	4.5602	-0.8339	4.3862	7.266	4.9208	-4.2934	2.3508	-9.9658	-9.9658	-9.9658	-0.5332	2.4279	-4.035
GBMLGG	TCGA-HT-7605-01	2.91265	1.8404	-3.1714	-6.5064	0.4016	4.7955	-5.0116	7.7413	2.9544	-3.816	-1.8836	-3.816	-9.9658	-9.9658	-5.0116	-1.7809	-2.8262	-3.3076	3.9261	0.517	4.5516	6.9349	5.3961	-2.3884	-0.8863	3.6277	4.373	1.1706	-1.5951	-4.2934	1.0363	-5.5735	-4.2934	-5.0116	6.5898	1.2636	-2.7274	3.0876	8.6581	3.3773	-9.9658	3.1971	-9.9658	-9.9658	-9.9658	-0.6643	2.5996	-9.9658
GBMLGG	TCGA-S9-A6WO-01	2.97635	2.0289	-0.9406	-2.9324	0.2277	5.392	-5.5735	6.9381	4.4081	-5.5735	-1.5105	-2.8262	-9.9658	-9.9658	-9.9658	0.0014	-3.458	-2.8262	5.4689	-3.1714	4.3191	6.902	6.8533	-0.9686	-3.0469	3.2541	3.6474	-0.0277	-0.8599	-5.0116	2.0638	-4.6082	-9.9658	-4.2934	5.5021	-1.0559	-4.2934	4.3477	8.8513	1.7617	-9.9658	2.0742	-9.9658	-9.9658	-9.9658	-1.1811	3.7006	-9.9658
GBMLGG	TCGA-06-0138-01	3.28096	1.0363	-1.8836	-2.1779	0.5069	6.1252	-3.3076	6.3236	4.6271	-1.4699	2.1147	-3.6259	-9.9658	-4.6082	-9.9658	0.3907	-0.9686	-0.2159	5.284	-1.1172	8.0477	7.1105	5.7926	-3.458	1.683	3.8239	4.4784	2.5707	-0.2845	-1.5522	3.1955	-2.7274	-1.9942	-1.6394	4.1433	4.359	0.7748	4.5243	8.1367	3.7836	-3.3076	1.8201	-9.9658	-9.9658	-9.9658	0.688	4.5342	-9.9658
GBMLGG	TCGA-28-5208-01	4.04788	1.4652	-4.035	-1.7809	0.1519	7.0934	-1.9942	6.9612	4.7181	-0.2845	0.2522	-3.1714	-9.9658	-5.0116	-5.5735	-0.3566	-2.7274	0.1519	5.4307	-2.5479	5.1449	6.841	5.09	-0.394	1.0915	4.1883	4.8329	2.0183	-0.8339	-2.4659	3.6018	-4.035	1.6875	-2.0529	4.8207	3.8002	1.0363	4.5516	9.5404	3.3563	-4.2934	1.2576	-9.9658	-9.9658	-9.9658	-0.7346	1.884	-9.9658
GBMLGG	TCGA-06-1804-01	4.09594	2.5731	1.1897	-6.5064	0.5859	6.2752	-1.685	7.4543	3.8075	-0.7346	-0.1345	-2.7274	-9.9658	-4.2934	-9.9658	-1.0559	-2.114	-1.4305	5.5361	0.6239	7.6185	7.3053	5.8523	-4.035	0.3115	4.66	5.3342	1.0363	0.5568	-4.035	2.8442	-3.816	-2.3884	-1.3183	4.322	2.8681	4.4719	3.9929	7.9353	2.0742	-5.0116	2.2573	-4.2934	-9.9658	-9.9658	-0.5756	2.8838	-9.9658
GBMLGG	TCGA-QH-A6CX-01	2.9222	-0.1504	-3.3076	-2.2447	-0.0725	6.5121	-6.5064	5.2107	3.8421	-3.6259	-0.9406	-9.9658	-0.7346	-4.2934	-5.5735	-2.0529	-3.6259	-3.0469	5.0661	-3.816	3.7017	8.2426	5.0117	-3.816	-0.4521	2.872	2.3677	1.1184	-2.114	-4.2934	0.5666	-4.2934	-9.9658	-5.5735	5.0423	-1.0262	-4.6082	2.8482	8.0829	2.5087	-9.9658	2.7161	-9.9658	-9.9658	-9.9658	-0.8863	0.5069	-9.9658
GBMLGG	TCGA-14-2554-01	3.17314	0.7321	-2.9324	-0.013	0.5955	5.7634	-1.8836	6.0505	4.4074	-1.5951	1.196	-9.9658	-9.9658	-9.9658	-9.9658	-2.9324	-2.4659	-1.5951	4.4443	-3.6259	6.4413	6.5729	5.9378	-4.035	1.2271	3.0463	3.4424	2.409	-0.3201	-2.9324	2.3953	-3.3076	0.8961	-2.6349	4.4732	3.8411	-1.0559	3.9393	8.7852	4.1852	-3.6259	1.2696	-9.9658	-9.9658	-3.458	0.4447	3.863	-4.035
GBMLGG	TCGA-P5-A5F4-01	2.84197	2.6579	-4.035	-3.1714	-0.1187	4.8319	-2.3884	6.9686	1.4388	-9.9658	-0.8599	-1.9942	-9.9658	-9.9658	-4.6082	-0.8599	-9.9658	-3.0469	4.1103	-3.1714	5.2709	7.2723	5.5611	-0.9132	-0.0725	2.8178	1.8801	1.8201	-0.3022	-5.5735	1.7702	-3.816	-4.6082	-9.9658	5.7597	-0.7108	-5.0116	2.9525	8.4758	1.8282	-6.5064	2.2082	-9.9658	-5.0116	-9.9658	-0.0425	3.6463	-9.9658
GBMLGG	TCGA-DU-A76K-01	3.36459	1.3167	-2.8262	-4.035	-0.4131	5.235	-3.0469	7.6149	1.125	-2.8262	-5.5735	-2.6349	-9.9658	-6.5064	-9.9658	-0.4719	-3.816	-4.6082	3.603	-3.458	4.7307	6.7996	5.4094	-3.3076	-1.5105	2.9128	3.3464	0.9115	-2.0529	-6.5064	1.0293	-5.5735	-9.9658	-4.6082	5.5389	-0.2671	-1.5951	2.3704	8.2622	1.0642	-5.5735	0.9935	-3.6259	-9.9658	-9.9658	-2.5479	1.9564	-9.9658
GBMLGG	TCGA-VM-A8CH-01	2.56074	1.4547	-9.9658	-3.6259	-0.394	4.8939	-1.9379	7.08	3.7656	-9.9658	-0.7588	-3.3076	-9.9658	-9.9658	-9.9658	2.3337	-3.1714	-2.7274	5.2638	-2.1779	4.373	7.1805	6.4449	-1.4305	-1.5951	3.5337	3.8857	-0.4131	-1.4699	-4.035	1.4859	-9.9658	-9.9658	-2.7274	5.7621	-1.0862	-1.8314	3.551	8.8166	2.4144	-9.9658	1.0293	-9.9658	-9.9658	-9.9658	-3.0469	0.2154	-9.9658
GBMLGG	TCGA-HT-7609-01	2.32484	1.3791	-2.7274	-2.6349	-0.2498	5.1867	-3.816	6.9474	3.9719	-9.9658	-3.6259	-3.816	-9.9658	-9.9658	-5.5735	-0.8863	-4.035	-4.6082	4.637	-2.0529	3.4543	6.6005	6.3611	-2.6349	-4.035	2.9243	2.0878	-0.2159	-2.0529	-9.9658	0.8568	-6.5064	-9.9658	-3.6259	5.7616	-2.0529	-3.1714	3.5982	8.5738	2.3423	-9.9658	0.3796	-9.9658	-9.9658	-9.9658	0.8246	4.8141	-9.9658
GBMLGG	TCGA-27-2528-01	4.34341	1.2455	-4.6082	-2.1779	1.9452	6.7943	-5.5735	6.3586	2.3953	-4.6082	0.3796	-4.2934	0.3115	-5.0116	-9.9658	-2.114	-4.035	-2.4659	5.5589	-5.5735	8.0909	7.2317	3.9929	-5.0116	-1.3183	3.5887	4.579	1.4441	-2.6349	-2.2447	2.9262	-9.9658	-3.0469	-3.816	5.405	1.736	-0.013	4.314	9.2228	3.335	-9.9658	1.4441	-4.035	-9.9658	-9.9658	-1.5522	2.909	-9.9658
GBMLGG	TCGA-QH-A6X4-01	3.43166	1.5806	-5.5735	-9.9658	-2.4659	4.9905	-6.5064	4.7198	2.6255	-9.9658	-3.6259	-3.6259	-9.9658	-5.5735	-9.9658	-0.4131	-5.0116	-5.0116	4.2158	-3.458	4.466	7.1407	5.4973	-2.6349	-3.816	3.9308	3.7571	-1.8314	-1.3183	-6.5064	0.4657	-9.9658	-9.9658	-9.9658	5.1052	-5.5735	-6.5064	2.791	8.9599	0.346	-9.9658	2.6487	-9.9658	-9.9658	-9.9658	-4.2934	-2.114	-9.9658
GBMLGG	TCGA-DH-A7UV-01	2.35053	2.0183	-3.458	-3.3076	-0.6873	4.9016	-2.9324	7.0824	3.6861	-9.9658	-0.6193	-1.4305	-9.9658	-9.9658	-6.5064	0.2154	-3.0469	-3.1714	5.5993	-2.8262	5.2044	7.2415	6.5974	-1.2481	-3.6259	3.1442	3.2511	-0.6193	-1.4699	-5.0116	1.7489	-9.9658	-9.9658	-5.5735	4.7033	-2.4659	-5.5735	3.3925	8.5277	1.7828	-9.9658	0.9115	-9.9658	-9.9658	-9.9658	-2.1779	0.4865	-4.2934
GBMLGG	TCGA-TM-A7C3-01	3.1077	2.4465	1.2516	-0.8599	0.1388	6.0592	-2.3884	7.1639	2.0844	-2.6349	-3.0469	-1.3921	-2.9324	-9.9658	-4.6082	-2.114	-2.6349	-0.9686	3.8729	-1.5951	6.1381	6.8236	4.245	-2.7274	1.2516	4.0722	4.6685	1.3567	-0.1993	-3.816	1.5415	-2.3884	-9.9658	-2.3884	5.0781	1.7575	1.4859	3.2481	9.2049	2.6464	-3.1714	1.8242	-3.0469	-9.9658	-9.9658	-3.1714	0.605	-9.9658
GBMLGG	TCGA-S9-A6WG-01	3.68145	2.4063	-1.685	-1.4699	0.346	5.4377	-0.8599	5.5844	4.1891	-2.0529	0.1124	-2.5479	-9.9658	-4.035	-4.035	1.6964	-1.0262	-1.7809	6.1843	-0.9686	3.9965	7.2898	6.4837	-4.2934	0.2642	3.4224	4.1368	3.5022	0.4552	-2.2447	3.3911	-1.9379	-3.1714	-4.2934	6.591	2.791	-0.4131	4.6543	8.7762	6.0803	-3.0469	1.3956	-9.9658	-9.9658	-5.0116	0.7832	5.1946	-9.9658
GBMLGG	TCGA-06-5858-01	4.37642	1.3167	-3.816	-4.035	1.0983	7.2904	-2.4659	7.2739	5.1457	0.605	-1.2828	-3.458	-1.9942	-5.5735	-9.9658	0.4865	-2.9324	-1.0862	5.5015	-1.8314	9.2721	7.6673	5.5759	-1.0559	-0.7834	4.2929	6.1601	1.683	-0.8599	-2.2447	3.0995	-3.458	-9.9658	-0.8084	5.0479	3.4331	1.2333	5.3147	8.8962	3.5424	-4.6082	1.934	-2.9324	-9.9658	-9.9658	0.3346	3.7783	-9.9658
GBMLGG	TCGA-FG-6690-01	3.29864	1.1447	-3.6259	-3.816	-0.3752	4.8043	-5.0116	7.1592	4.2586	-2.6349	-2.2447	-3.6259	-9.9658	-9.9658	-9.9658	-0.4521	-2.9324	-1.7322	4.862	-2.9324	2.4883	7.0227	6.7683	-1.4305	-0.5332	3.9261	5.3586	1.5563	-0.9686	-2.9324	1.6234	-3.458	-9.9658	-3.458	4.9122	-3.3076	-3.458	4.0584	8.686	1.2576	-9.9658	1.5854	-9.9658	-9.9658	-9.9658	-4.2934	2.3926	-9.9658
GBMLGG	TCGA-DU-8167-01	2.68262	1.9188	-4.6082	-1.9942	0.0854	5.2791	-4.6082	5.7541	4.3191	-2.5479	-1.5522	-2.9324	-3.3076	-9.9658	-9.9658	0.9115	-1.5522	-2.8262	5.0871	-3.458	2.8858	6.9207	6.0721	-1.2481	-1.5105	3.6497	3.4156	1.7617	-1.5105	-2.8262	2.876	-4.6082	-9.9658	-2.1779	5.5463	1.4652	0.5069	3.5547	8.5908	3.0323	-6.5064	2.4649	-9.9658	-5.5735	-4.6082	1.9226	6.8435	-9.9658
GBMLGG	TCGA-QH-A65X-01	2.96344	2.1957	-9.9658	-5.0116	-3.458	5.6059	-1.8314	4.562	0.3231	-1.0262	-3.816	-4.2934	-9.9658	-3.816	-3.3076	1.4962	-2.5479	-2.114	4.8475	-5.0116	4.2899	8.722	5.4026	-1.5951	-0.1504	2.043	3.47	2.4701	0.099	-3.816	2.2931	-4.2934	-3.3076	-5.5735	5.3886	0.4233	0.537	2.9857	8.4419	2.036	-9.9658	0.0158	-9.9658	-9.9658	-9.9658	-9.9658	-0.2328	-9.9658
GBMLGG	TCGA-06-0178-01	2.40868	0.099	-5.5735	-9.9658	-1.9942	5.2308	-3.3076	4.8115	4.6921	-1.7809	1.683	-3.1714	-2.5479	-9.9658	-5.5735	0.9191	-3.816	0.058	4.4996	-2.0529	2.9544	6.2514	4.6617	-2.4659	0.8883	3.6312	2.7763	2.0076	-0.3383	-1.7322	2.5948	-5.5735	-1.9942	-2.3147	3.8541	3.3364	0.1519	4.2877	7.6145	1.6512	-3.816	-0.2159	-9.9658	-9.9658	-9.9658	0.434	2.7508	-9.9658
GBMLGG	TCGA-P5-A780-01	2.13422	1.4859	-4.6082	-5.0116	-1.1811	5.4916	-0.6643	5.1136	3.2988	-3.1714	-2.5479	-5.0116	-9.9658	-5.5735	-9.9658	-0.9686	-3.3076	-3.1714	4.518	-3.6259	4.5423	6.3275	5.4621	-2.3884	-1.2828	2.7205	3.1733	0.5763	-0.6643	-4.2934	1.4441	-5.5735	-5.0116	-3.6259	6.4959	-0.0277	-2.6349	3.0533	8.4976	2.4623	-5.5735	2.1925	-9.9658	-9.9658	-5.5735	0.1903	5.9477	-9.9658
GBMLGG	TCGA-E1-5302-01	3.54599	1.5415	-4.035	-3.1714	-0.3383	5.0896	-2.3147	8.0606	4.6035	-2.7274	-1.7809	-9.9658	-9.9658	-9.9658	-9.9658	-2.7274	-4.2934	-2.9324	5.2664	-0.7834	2.6962	7.3093	7.39	-1.7322	-1.1488	4.3979	5.7269	0.4761	-0.8084	-4.2934	1.6875	-2.4659	-9.9658	-3.6259	5.6854	-1.7809	-0.6873	3.8401	8.5792	2.6487	-5.0116	1.3567	-9.9658	-9.9658	-9.9658	-2.3147	0.9716	-9.9658
GBMLGG	TCGA-14-1823-01	2.3618	-0.0877	-3.816	-1.8836	0.2762	5.9385	-1.7809	5.445	5.1639	0.1519	1.6558	-9.9658	-2.8262	-4.035	-9.9658	-1.4305	-3.816	-0.2845	3.9892	-2.4659	6.4517	6.7444	5.8304	-3.816	2.0844	3.6972	5.0683	2.5363	-1.0262	-2.9324	2.667	-2.8262	-0.5973	-3.1714	4.178	3.9261	1.0503	3.9645	8.2647	4.6888	-1.8314	0.8647	-9.9658	-9.9658	-9.9658	1.2576	4.9012	-9.9658
GBMLGG	TCGA-HW-A5KJ-01	2.08746	1.9377	-5.0116	-9.9658	-1.685	3.8531	-1.685	4.8131	-0.8339	-9.9658	-4.2934	-2.7274	-9.9658	-9.9658	-9.9658	0.517	-3.816	-1.6394	2.5061	-3.458	3.1045	6.8049	4.0242	-2.114	1.177	2.4198	2.9032	3.136	-0.0277	-3.816	2.0254	-6.5064	-5.5735	-9.9658	4.4516	-1.1488	-5.0116	2.5707	8.2659	1.4494	-5.0116	-1.2828	-9.9658	-9.9658	-5.5735	-9.9658	-2.2447	-9.9658
GBMLGG	TCGA-R8-A6MO-01	3.11265	1.884	-9.9658	-5.0116	-1.4699	4.5091	-2.3147	3.6612	3.0376	-3.816	-3.6259	-1.8836	-9.9658	-9.9658	-9.9658	-0.7108	-2.5479	-1.7809	5.1148	-2.8262	5.7074	7.1481	6.1385	-3.458	-0.4521	4.3184	3.4264	1.6604	-0.1828	-5.5735	1.7403	-6.5064	-5.0116	-4.035	4.9388	-2.6349	-2.5479	3.0145	8.5902	0.7664	-5.5735	1.3051	-9.9658	-5.5735	-4.6082	-9.9658	-0.8863	-9.9658
GBMLGG	TCGA-FG-7636-01	2.77817	1.2271	-5.5735	-3.816	-2.0529	5.1627	-3.816	6.8647	3.2572	-9.9658	-3.1714	-4.035	-9.9658	-9.9658	-9.9658	-1.3921	-4.6082	-9.9658	4.6242	-3.6259	2.578	7.0678	6.2719	-1.3183	-5.0116	3.1685	3.9337	-1.4699	-2.2447	-9.9658	1.1512	-5.5735	-9.9658	-6.5064	6.1607	-3.0469	-2.8262	2.8936	8.463	0.4657	-9.9658	1.8078	-9.9658	-9.9658	-9.9658	-3.1714	-0.3566	-9.9658
GBMLGG	TCGA-CS-6290-01	2.41414	1.2085	-4.2934	-1.5951	0.8246	5.1165	-3.3076	7.2594	5.3799	-3.6259	1.0079	-4.035	-9.9658	-9.9658	-5.5735	-0.7108	-1.5105	-1.5105	5.4916	-1.685	3.325	6.7681	7.0339	-2.1779	0.346	3.8896	4.8744	1.8957	-0.5756	-3.816	2.4332	-3.458	-3.816	-2.114	5.1165	0.8408	0.044	4.3814	8.7061	3.0323	-4.6082	1.9968	-9.9658	-9.9658	-9.9658	-0.2845	3.034	-9.9658
GBMLGG	TCGA-DU-5847-01	4.02412	0.8488	-4.2934	-1.5522	1.3846	6.4491	-0.8863	6.9	5.0427	-1.7322	1.1641	-4.6082	-9.9658	-9.9658	-5.0116	-0.1187	-0.5332	-0.1031	5.7247	-0.3752	4.8837	7.723	5.6977	-5.0116	3.3105	4.4771	5.2277	3.5851	0.7146	-0.0877	4.1277	0.24	-1.9379	-0.9971	4.6177	3.8259	0.4865	4.2958	8.5758	4.8807	-1.3548	2.9469	-9.9658	-9.9658	-2.8262	1.5216	4.9336	-5.0116
GBMLGG	TCGA-DU-6406-01	4.70764	2.1476	-2.6349	-4.6082	3.3235	6.7389	-2.114	7.5377	3.7496	4.3807	-3.0469	-3.1714	-9.9658	-4.2934	-5.5735	-1.9942	-2.0529	-3.816	5.4719	-2.9324	6.0877	6.9438	5.6739	-2.3884	-0.1665	5.9864	6.8846	0.9115	-1.1488	-3.1714	2.9637	-4.035	-1.0262	-3.458	5.3551	5.3317	2.2482	4.1571	9.3911	5.5245	-4.035	2.05	-9.9658	-9.9658	-5.5735	-2.4659	1.0151	-9.9658
GBMLGG	TCGA-06-0743-01	2.97267	2.3423	-1.0262	-3.6259	0.6699	6.1353	-1.9379	6.5812	3.6172	-0.2671	-0.2845	-1.0262	0.5859	-4.035	-4.6082	0.346	-1.8314	-1.0559	5.6702	-1.4699	6.8819	7.4289	5.0229	-4.035	1.8036	3.2929	3.7888	2.6647	0.0158	-3.3076	2.6348	-1.9942	0.8568	-2.0529	4.6118	3.3061	1.0222	3.2796	8.3599	3.6148	-2.8262	2.0979	-9.9658	-9.9658	-3.3076	-0.2845	3.4881	-9.9658
GBMLGG	TCGA-TM-A84B-01	3.80945	2.1313	-3.458	-5.5735	-0.2498	6.1977	-1.7809	8.468	1.9111	-0.9686	-3.3076	-4.2934	-9.9658	-9.9658	-9.9658	-1.3921	-1.9379	-0.6643	3.7614	2.8482	5.3941	7.7284	3.2328	-3.0469	0.9115	4.9122	5.3565	2.7292	0.2881	-2.8262	1.177	-1.3548	-2.3147	-2.9324	4.3421	3.4464	1.6093	3.6861	9.1201	2.4857	-3.458	0.2642	-9.9658	-9.9658	-9.9658	-6.5064	-0.8084	-9.9658
GBMLGG	TCGA-DU-A76O-01	2.84197	1.6649	-9.9658	-2.9324	-2.9324	5.2384	-1.7809	6.5173	4.3506	-5.5735	-0.7108	-2.2447	-9.9658	-9.9658	-9.9658	0.03	-5.0116	-9.9658	5.0189	-4.035	3.66	7.3705	7.4395	-0.5125	-3.816	4.2548	4.2488	0.5271	-1.3548	-5.0116	1.8801	-5.0116	-9.9658	-5.5735	6.0676	-2.9324	-4.6082	3.6042	8.651	1.7097	-5.5735	1.2934	-9.9658	-9.9658	-9.9658	-3.3076	-0.8599	-9.9658
LGG	TCGA-S9-A7J2-01	3.06526	1.8484	-5.5735	-4.035	-0.8339	5.2765	-9.9658	7.437	2.2872	-3.6259	-2.4659	-2.3884	-9.9658	-5.0116	-9.9658	-0.0277	-5.0116	-4.2934	4.905	-2.4659	5.1371	7.5961	4.9561	-2.9324	-2.7274	4.1186	3.7773	-1.685	-0.4521	-3.6259	0.9343	-9.9658	-3.816	-6.5064	6.5509	-3.1714	-3.816	3.5199	8.8466	1.7954	-9.9658	-1.1811	-9.9658	-9.9658	-9.9658	-1.4699	3.7762	-9.9658
LGG	TCGA-E1-A7YI-01	5.14774	2.4753	-4.2934	-3.6259	-2.0529	6.5236	-1.5951	3.8847	3.3605	-3.6259	-1.3921	-5.5735	-9.9658	-9.9658	-9.9658	1.9675	-2.1779	-3.3076	5.7767	-5.0116	6.5644	7.508	5.6171	-0.8339	-2.114	5.2913	5.741	0.688	-0.0877	-2.6349	1.2815	-3.458	0.6425	-2.8262	5.5426	1.2756	-0.9406	3.3032	9.9958	2.1247	-3.816	2.9224	-9.9658	-9.9658	-9.9658	-6.5064	-0.8863	-9.9658
LGG	TCGA-DU-7302-01	3.50462	1.4281	-1.2142	-4.035	0.2762	5.022	-3.458	6.1428	2.6895	-5.5735	-3.0469	-3.458	-9.9658	-9.9658	-9.9658	-1.9942	-6.5064	-3.6259	3.5682	-3.1714	4.5994	6.3422	5.464	-2.6349	-2.2447	4.7735	3.4752	-0.9132	-1.2142	-6.5064	1.7009	-9.9658	-9.9658	-3.3076	6.4801	-0.8339	-1.1488	3.4129	8.8106	1.8524	-6.5064	0.5955	-9.9658	-9.9658	-9.9658	-2.1779	0.6145	-9.9658
LGG	TCGA-DU-A7TI-01	3.34771	1.5563	-0.5125	-2.5479	1.9564	5.1831	-0.9686	8.3675	4.9746	-1.9379	0.7058	-1.8836	-9.9658	-9.9658	-9.9658	1.5902	0.2154	-1.2481	5.599	-2.1779	5.4516	6.7385	6.1138	-1.2828	-2.4659	4.7603	5.073	1.2696	0.2642	-5.5735	2.4171	-4.6082	-1.5522	-0.2845	6.0284	4.3442	-1.7809	4.1153	8.6527	4.6502	-3.1714	2.0946	-3.816	-9.9658	-5.0116	1.683	6.523	-9.9658
LGG	TCGA-P5-A5EX-01	2.35614	1.9675	-2.9324	-3.1714	4.4101	6.0555	-0.9686	3.9318	4.0366	-1.0262	-0.4325	-3.816	-9.9658	-9.9658	-5.5735	0.0854	-0.8863	1.6875	5.1094	-0.3201	7.3486	7.6131	6.1363	-4.2934	3.2297	4.3709	5.2657	4.2743	2.2543	-1.5105	2.791	-1.5522	0.8082	-1.5522	5.7822	3.309	1.3956	3.4739	8.3174	5.4023	-2.5479	1.9188	-9.9658	-9.9658	-3.1714	-0.4131	3.3076	-9.9658
LGG	TCGA-HT-8563-01	3.42359	1.5064	-2.7274	-1.685	3.449	7.8556	0.099	5.6876	6.2534	7.4984	3.0287	-3.1714	-9.9658	-3.0469	-0.9971	0.6145	0.5859	1.4652	5.6918	0.4233	5.9491	7.2742	6.9351	-0.9406	3.755	7.4258	8.3784	4.8635	2.5561	0.1124	4.0833	-1.0262	-0.9971	-0.4521	5.8692	5.4565	5.0361	5.079	7.7935	6.1463	-0.4719	2.8199	-9.9658	-9.9658	-2.2447	0.044	2.4883	-5.0116
LGG	TCGA-FG-A60K-01	3.17634	1.4547	-2.6349	-5.5735	-1.4305	5.1425	-2.6349	7.4166	3.421	-3.1714	-1.4305	-2.5479	-9.9658	-5.5735	-9.9658	-1.2828	-4.6082	-2.3884	4.1211	-1.1811	4.7367	6.9777	5.9234	-3.0469	-1.9379	3.7138	3.97	0.6332	-0.8863	-3.816	1.0915	-9.9658	-9.9658	-4.2934	6.1115	-0.2159	-5.0116	3.7992	8.943	0.688	-6.5064	2.3019	-9.9658	-5.0116	-9.9658	-5.0116	-0.8339	-9.9658
LGG	TCGA-CS-5397-01	3.83388	0.6517	-4.035	-2.8262	1.5115	5.1478	-2.0529	6.5583	4.6422	-1.9379	-1.1488	-4.2934	-9.9658	-4.6082	-9.9658	-1.8314	-3.6259	-5.0116	4.5994	-4.035	3.9261	6.8224	6.1563	-5.5735	-0.7834	2.909	3.1939	1.0151	-1.4305	-2.3884	3.7378	-4.035	-2.4659	-2.3884	5.9081	0.9642	-0.5543	4.245	8.7789	2.7336	-5.5735	2.7615	-9.9658	-5.0116	-9.9658	-0.2845	3.2511	-9.9658
LGG	TCGA-E1-5322-01	3.65307	0.6332	-3.0469	-2.6349	-0.5543	5.9798	-3.3076	7.5319	4.3876	-4.035	-1.5522	-5.0116	-9.9658	-9.9658	-9.9658	-0.7346	-1.6394	-3.816	5.1807	-3.3076	3.7518	7.3386	6.6337	-0.5973	-5.0116	3.83	4.3723	0.1903	-1.8314	-2.7274	1.8879	-6.5064	-3.458	-2.8262	5.9076	0.7146	-4.035	4.0366	8.8779	2.9319	-6.5064	1.105	-9.9658	-9.9658	-9.9658	-0.7588	3.9691	-9.9658
LGG	TCGA-HT-8558-01	2.51099	1.5415	-2.3884	-5.5735	-0.0574	3.4635	-3.816	4.359	2.3508	-5.5735	-5.5735	-2.6349	-9.9658	-9.9658	-9.9658	-1.685	-4.6082	-3.3076	3.0825	-3.816	3.5887	6.3053	5.1227	-4.2934	-4.6082	2.0673	0.9191	-1.5951	-1.2828	-6.5064	1.4808	-5.5735	-4.6082	-6.5064	6.7609	-2.9324	-5.5735	2.5437	8.3511	0.8082	-5.5735	4.166	-9.9658	-3.6259	-9.9658	-2.7274	1.0079	-9.9658
LGG	TCGA-S9-A6U8-01	2.63462	1.8722	-3.458	-2.3147	0.7233	5.3417	-2.114	7.8382	4.9203	-9.9658	-0.8339	-2.3147	-9.9658	-9.9658	-9.9658	-0.2845	-6.5064	-4.035	5.9444	-1.4699	3.6347	7.3691	6.5756	-1.8314	-2.9324	2.9893	3.1507	-0.1031	-0.4921	-4.2934	1.9822	-5.5735	-4.035	-6.5064	5.2698	-0.7834	-2.7274	4.429	8.9048	2.4144	-6.5064	2.3048	-9.9658	-9.9658	-9.9658	-1.3921	2.0742	-9.9658
LGG	TCGA-HT-7854-01	2.48803	-0.1345	-0.7346	-3.3076	1.2756	4.6938	-2.6349	7.563	4.7198	-9.9658	0.434	-3.0469	-9.9658	-9.9658	-9.9658	-1.1172	-1.2142	-2.3147	5.5817	-2.7274	5.4363	6.9702	7.2669	-5.0116	-0.8339	3.5559	4.3285	1.3679	-2.0529	-3.1714	2.8681	-3.0469	-2.3147	-1.3548	6.9904	1.8036	-1.1488	4.1962	8.7736	5.3562	-6.5064	3.074	-9.9658	-9.9658	-9.9658	2.6278	6.0479	-9.9658
LGG	TCGA-HT-7467-01	2.91265	1.6466	-3.1714	-5.0116	-0.8863	4.0091	-2.6349	5.392	2.4571	-4.6082	-1.685	-3.3076	-9.9658	-9.9658	-4.035	-1.3921	-5.5735	-3.1714	3.3336	-3.458	4.0144	6.3768	5.5988	-3.3076	-1.9942	3.4224	3.6148	0.346	-1.4305	-6.5064	1.614	-4.2934	-4.2934	-5.0116	5.4608	-0.5756	-0.5973	3.0671	8.397	0.7748	-6.5064	4.2373	-9.9658	-3.6259	-4.2934	-2.3884	-1.4699	-9.9658
LGG	TCGA-HT-7874-01	2.97818	1.2394	-1.5522	-3.816	0.0854	4.1011	-3.458	6.04	2.1444	-9.9658	-3.6259	-4.035	-9.9658	-9.9658	-9.9658	-1.1488	-6.5064	-4.2934	2.9224	-0.5125	3.8798	6.3745	6.2283	-3.816	-2.5479	3.2915	3.2692	-0.4131	-1.4699	-9.9658	1.9149	-5.5735	-5.0116	-5.5735	5.9814	-2.3147	-2.9324	3.2647	8.4303	1.5465	-6.5064	2.791	-9.9658	-9.9658	-9.9658	-1.9379	2.3677	-9.9658
LGG	TCGA-S9-A6TV-01	3.12266	2.1013	-4.2934	-3.6259	3.1409	6.7018	-2.8262	5.9458	4.6759	4.5988	0.9568	-1.5522	-9.9658	-2.9324	-2.4659	0.8082	-3.0469	0.5069	5.2902	-1.6394	8.1683	7.8212	6.0481	-1.5105	2.727	5.6617	6.8102	1.6875	-0.394	-2.0529	2.7095	-3.816	-1.2828	-0.8863	6.6518	4.6888	0.9642	3.6172	9.4107	5.9308	-4.035	2.4359	-9.9658	-9.9658	-4.035	-0.0277	3.8218	-9.9658
LGG	TCGA-VM-A8CD-01	4.12015	0.5955	-3.3076	-2.1779	2.409	6.4244	-2.5479	4.9901	4.6685	-1.0262	-0.5543	-1.7809	-2.6349	-9.9658	-6.5064	0.4657	-0.7108	-2.7274	4.8455	-4.035	5.4273	7.8477	6.1148	-4.2934	-0.5125	3.5149	4.0901	1.5013	-1.7322	-4.2934	1.9564	-4.6082	-1.5522	-1.4699	5.7895	6.286	1.9377	3.5851	7.8006	3.7443	-4.6082	2.9857	-1.4305	-9.9658	-5.5735	-0.7588	3.6312	-4.2934
LGG	TCGA-HT-7616-01	2.99635	1.7828	-1.9942	-0.6873	1.0983	5.1044	0.2881	4.9951	3.186	1.7229	2.8076	-9.9658	-9.9658	-5.5735	-4.2934	3.7269	-0.4325	2.6738	3.4791	0.8082	5.4363	6.4276	6.0756	-2.4659	3.2796	5.1603	5.797	4.497	2.8701	-0.2671	2.8522	-0.8863	-1.4305	-0.6193	4.6491	2.8301	4.4608	3.8798	8.1829	2.7249	-0.5973	0.0854	-9.9658	-9.9658	-5.0116	-3.816	1.0222	-3.458
LGG	TCGA-KT-A7W1-01	4.68648	2.2753	-9.9658	-3.0469	1.5013	7.2596	-1.9379	7.7517	2.7487	3.928	-2.1779	-0.0877	-1.3548	-9.9658	-9.9658	-0.2845	-0.7346	-1.7809	5.2877	-2.3147	6.206	7.1677	4.6023	-3.3076	1.334	5.2381	5.3027	2.8422	-0.2671	-2.9324	1.46	-2.1779	-2.8262	-2.7274	5.0532	6.7554	1.2516	3.8431	9.3726	3.9801	-2.9324	2.0776	-3.816	-3.6259	-5.0116	-3.6259	2.1411	-3.458
LGG	TCGA-P5-A5F2-01	3.09596	0.9191	-5.5735	-5.5735	0.24	4.4047	-5.5735	5.9021	2.0569	-5.5735	-1.4305	-4.2934	-9.9658	-5.0116	-9.9658	-1.2481	-5.5735	-4.035	3.8228	-3.6259	4.6077	7.3775	6.1916	-2.9324	-3.458	3.2737	4.2714	-0.9686	-1.1172	-9.9658	0.7058	-9.9658	-9.9658	-6.5064	5.3555	-4.035	-3.458	2.8582	8.4941	1.4228	-5.0116	0.4967	-9.9658	-9.9658	-9.9658	-1.1172	3.5449	-9.9658
LGG	TCGA-HT-7607-01	3.36459	1.4704	-2.5479	-4.035	0.2998	4.2434	-1.9379	6.8631	2.8402	-9.9658	-0.6873	-2.9324	-9.9658	-9.9658	-9.9658	-2.114	-5.0116	-2.3884	3.1212	-1.6394	4.2906	6.5878	5.5546	-3.1714	-1.6394	3.453	4.2419	1.2209	-1.3183	-3.458	2.2268	-5.0116	-9.9658	-4.6082	6.1485	2.1476	-1.685	3.0376	8.4759	3.3717	-4.2934	2.828	-9.9658	-5.5735	-9.9658	-1.7809	1.9859	-9.9658
LGG	TCGA-HT-7873-01	3.47383	1.8323	-0.8863	-1.1811	0.3231	5.5021	-1.685	7.6042	4.2669	-9.9658	-1.6394	-2.7274	-9.9658	-9.9658	-9.9658	0.7146	-4.6082	-5.5735	5.1014	-2.4659	4.9031	6.8564	6.6618	-3.1714	-9.9658	3.5111	3.0252	-0.6416	-0.2671	-5.5735	1.6093	-9.9658	-9.9658	-5.5735	5.5018	-2.6349	-9.9658	4.1359	9.0967	1.9564	-9.9658	1.9264	-9.9658	-5.0116	-9.9658	-0.1993	0.5763	-9.9658
LGG	TCGA-HT-7603-01	2.11103	0.8726	-2.114	-4.035	0.4552	3.927	-3.6259	7.005	2.4779	-9.9658	-5.0116	-3.6259	-9.9658	-6.5064	-9.9658	-2.8262	-9.9658	-4.2934	3.3689	-4.035	2.6019	6.872	5.6744	-2.2447	-2.7274	2.4332	4.1145	-1.3921	-1.7809	-5.0116	1.0711	-9.9658	-2.7274	-9.9658	5.7342	-5.5735	-6.5064	2.6579	8.5803	0.3796	-9.9658	1.1117	-9.9658	-9.9658	-9.9658	-2.9324	-0.9406	-9.9658
LGG	TCGA-DB-A64P-01	3.31322	1.4388	-4.6082	-9.9658	-0.8599	4.9883	-1.6394	6.948	2.6647	-0.7834	-0.6416	-3.0469	-9.9658	-9.9658	-9.9658	-0.8084	-2.5479	-1.4699	3.87	-2.2447	4.0994	7.0047	5.6756	-1.8836	-0.8339	3.794	1.0915	0.7916	-1.8836	-3.816	1.5661	-9.9658	-4.6082	-3.0469	6.5753	0.099	-0.1187	3.2112	8.9447	1.8078	-6.5064	0.8488	-4.6082	-9.9658	-9.9658	-2.1779	1.8722	-9.9658
LGG	TCGA-HW-7486-01	3.09427	1.0363	-4.6082	-4.6082	-0.1345	4.7898	-2.6349	7.2584	3.9792	-9.9658	-0.8084	-9.9658	-9.9658	-9.9658	-5.0116	-1.1488	-5.0116	-3.1714	4.0567	-0.5973	2.7117	6.6002	6.0378	-1.685	-2.1779	4.0331	4.504	0.7664	-1.1488	-4.035	1.8201	-9.9658	-5.0116	-3.458	5.5392	0.8488	-2.3884	3.603	8.8277	1.5902	-6.5064	4.0722	-9.9658	-9.9658	-9.9658	-1.685	0.0854	-9.9658
LGG	TCGA-P5-A5F1-01	2.63462	2.108	-3.1714	-2.3884	-0.4325	4.4951	-2.3884	8.2824	3.1011	-2.5479	-0.8339	-4.2934	-9.9658	-5.5735	-9.9658	-0.3566	-3.458	-1.3921	4.7192	-2.5479	4.3133	8.2194	6.3856	-3.3076	0.4761	3.0481	4.1458	2.2753	-1.3183	-5.0116	1.6512	-4.6082	-1.9942	-2.6349	5.2634	1.1184	-0.1665	3.2766	8.6689	2.5731	-4.6082	0.9493	-9.9658	-9.9658	-9.9658	-2.3884	2.0325	-9.9658
LGG	TCGA-DU-7011-01	2.06001	1.8119	-4.6082	-0.5332	0.2881	4.6977	-1.7322	8.6238	4.4277	-2.0529	0.3115	-4.035	-9.9658	-5.0116	-9.9658	-1.9379	-4.035	-1.2142	4.3449	-1.3548	3.4075	6.8005	6.3889	-2.6349	-1.1172	3.453	3.9289	1.0642	-1.4305	-3.0469	2.6418	-4.6082	-5.5735	-3.0469	5.6761	1.949	1.6649	4.1036	8.5315	2.694	-5.5735	1.2815	-9.9658	-9.9658	-9.9658	0.346	3.9156	-9.9658
LGG	TCGA-P5-A77X-01	3.04618	1.6466	-3.458	-6.5064	-0.6873	4.1852	-1.2481	6.2466	1.4859	-9.9658	-2.7274	-4.035	-9.9658	-5.5735	-9.9658	-0.8599	-5.0116	-3.458	2.5924	-1.5105	4.8475	6.791	4.3841	-4.6082	-1.3921	3.9654	4.2001	-0.9132	-0.7346	-5.5735	0.7233	-4.6082	-5.0116	-9.9658	4.9346	-3.458	-4.6082	3.0181	8.7753	0.099	-9.9658	0.679	-9.9658	-9.9658	-9.9658	-2.6349	-1.1488	-9.9658
LGG	TCGA-HW-7493-01	3.31905	1.2756	-4.035	-0.3752	0.8647	4.6439	-1.7322	8.6618	3.9728	-3.6259	0.8327	-9.9658	-9.9658	-9.9658	-5.5735	-1.9379	-3.3076	-0.5332	4.6697	-0.6416	3.668	7.05	6.0892	-2.9324	1.2333	3.4437	3.9983	2.236	-0.6416	-2.2447	1.9226	-5.5735	-9.9658	-4.2934	5.5289	2.0707	0.2154	4.1061	8.7638	3.6172	-9.9658	1.6558	-3.6259	-9.9658	-9.9658	1.7053	5.9616	-9.9658
LGG	TCGA-VM-A8CA-01	2.30454	2.236	-2.3147	-5.0116	0.2522	4.1351	-3.816	5.026	2.9469	-9.9658	-3.458	-9.9658	-9.9658	-4.035	-4.6082	-1.1172	-6.5064	-3.458	4.7458	-1.4699	2.4571	7.7281	6.4233	-3.816	0.2522	2.6232	3.453	1.1833	-1.685	-4.2934	2.4225	-5.5735	-2.9324	-4.6082	5.298	-0.2159	-6.5064	2.8321	8.3254	2.4008	-9.9658	0.6699	-9.9658	-9.9658	-5.5735	-0.6416	4.0926	-9.9658
LGG	TCGA-DU-7015-01	2.73769	0.9642	-2.4659	-3.6259	0.434	5.0313	-3.6259	8.0194	5.0313	-1.3183	0.346	-3.816	-9.9658	-4.6082	-9.9658	-1.0862	-3.458	0.9935	4.5342	-2.1779	3.2313	6.5771	6.7415	-2.2447	0.8726	4.0688	4.8822	2.0638	0.8961	-3.816	2.8462	-3.816	-3.6259	-3.816	5.3576	1.4065	1.46	4.5217	8.926	3.0145	-4.2934	0.3573	-9.9658	-9.9658	-9.9658	-0.6193	1.7575	-9.9658
LGG	TCGA-TM-A7C5-01	2.9891	1.196	-2.9324	-5.5735	-2.114	4.1482	-3.6259	4.431	1.3051	-3.458	-2.8262	-9.9658	-9.9658	-5.5735	-5.5735	-0.9406	-3.816	-0.8599	2.3898	-3.3076	4.9279	6.4936	4.4203	-1.8836	-2.2447	3.2677	2.7572	0.7233	-2.1779	-4.2934	0.8164	-4.6082	-9.9658	-9.9658	5.3331	-1.2481	-1.6394	2.8158	8.7022	0.547	-5.0116	-0.1993	-9.9658	-9.9658	-9.9658	-3.458	3.5174	-9.9658
LGG	TCGA-DU-8162-01	3.17154	1.3225	-1.0862	-4.6082	1.1577	4.6218	-2.0529	6.0547	3.2112	-4.2934	-1.6394	-3.6259	-9.9658	-5.5735	-9.9658	-2.4659	-4.2934	-3.3076	3.9204	-3.6259	4.996	6.4749	5.1708	-3.816	-2.3147	3.1653	2.826	0.1257	-1.5951	-3.458	1.6281	-4.6082	-9.9658	-4.2934	5.8212	-0.7346	-2.5479	3.5461	8.4217	2.7227	-9.9658	3.4277	-5.5735	-9.9658	-9.9658	1.0007	5.2346	-9.9658
LGG	TCGA-TM-A84O-01	2.85997	1.9931	-9.9658	-6.5064	-1.2481	5.1708	-3.458	6.3627	3.0568	-9.9658	-0.9406	-4.6082	-2.2447	-9.9658	-5.5735	-0.3383	-4.2934	-0.394	4.38	0.03	5.061	7.6177	4.6439	-1.7322	-0.1665	4.1931	4.447	1.5661	0.537	-3.816	2.081	-3.816	-1.8314	-3.458	6.6558	0.2881	-2.5479	3.5374	8.8221	2.872	-6.5064	0.2881	-9.9658	-9.9658	-9.9658	-1.5951	0.5859	-9.9658
LGG	TCGA-S9-A7R3-01	2.74414	1.4547	-2.2447	-0.8084	0.6969	4.7138	-2.7274	7.3442	3.9118	-9.9658	-0.9406	-3.6259	-9.9658	-9.9658	-9.9658	-0.0877	-5.5735	-4.2934	5.0484	-1.3921	3.7794	7.5245	6.8262	-1.3921	-0.7834	4.0216	3.6725	0.5568	-1.4699	-5.0116	1.2455	-4.6082	-9.9658	-4.2934	4.1587	-1.7322	-2.6349	3.9232	8.6956	1.8604	-9.9658	0.4233	-4.6082	-9.9658	-5.0116	-2.5479	2.118	-9.9658
LGG	TCGA-TQ-A7RN-01	3.20003	1.4228	-2.0529	-3.1714	-1.1488	5.0308	-3.816	7.2104	2.3222	-9.9658	-3.0469	-2.0529	-9.9658	-5.5735	-9.9658	-0.3022	-4.035	-4.035	4.1203	-1.2828	4.2258	7.49	5.623	-2.3147	-5.0116	4.4913	4.4095	-1.5522	-0.7108	-4.2934	0.7664	-9.9658	-9.9658	-4.035	6.7714	-1.7322	-1.7809	3.1245	8.7782	0.9191	-9.9658	0.9038	-9.9658	-9.9658	-9.9658	-3.1714	2.7007	-9.9658
LGG	TCGA-DU-A6S6-01	2.88554	2.128	-3.816	-5.5735	-1.0559	4.9308	-3.3076	6.3707	1.0847	-3.3076	-1.7809	-2.9324	-9.9658	-5.5735	-5.5735	-0.8084	-5.5735	-4.035	3.9327	-2.4659	4.4713	7.026	5.3772	-0.3201	-2.9324	3.8421	3.6838	-1.3921	-0.8599	-4.035	0.9419	-9.9658	-3.458	-9.9658	6.5264	-2.6349	-5.5735	2.7679	8.8293	1.1641	-9.9658	0.1776	-9.9658	-9.9658	-9.9658	-2.3147	1.9226	-9.9658
LGG	TCGA-P5-A735-01	2.72469	2.1378	-3.1714	-4.2934	-0.8599	5.4266	-1.4305	7.0337	3.4318	-9.9658	-1.1488	-2.2447	-2.7274	-9.9658	-9.9658	-0.6873	-4.6082	-3.816	5.0295	-2.6349	3.1653	7.4798	6.2026	-2.3147	-4.2934	2.9637	3.5754	-2.114	-1.0262	-9.9658	1.2696	-9.9658	-9.9658	-6.5064	6.1467	-3.816	-4.6082	3.1294	9.125	0.7146	-9.9658	2.1345	-9.9658	-9.9658	-9.9658	-2.1779	-0.0877	-9.9658
LGG	TCGA-HT-7691-01	2.75487	0.6699	-2.2447	-4.035	0.8488	4.6747	-2.5479	6.5181	4.2373	-0.5756	0.7407	-5.5735	-9.9658	-9.9658	-9.9658	-2.2447	-0.1504	-2.8262	4.8704	-1.1811	4.3242	7.8819	7.8419	-4.2934	-0.4921	3.8739	4.0549	1.5064	-1.5105	-3.816	3.091	-2.6349	-1.0862	-1.7809	4.445	-0.9686	-1.9942	3.8944	8.6464	3.6916	-4.2934	3.1393	-9.9658	-9.9658	-5.5735	1.2934	6.3663	-9.9658
LGG	TCGA-FG-A6J1-01	2.63462	2.0535	-2.6349	-4.035	-1.5522	5.3027	-1.4305	5.2791	2.7357	-2.8262	-3.458	-3.6259	-9.9658	-9.9658	-9.9658	0.6425	-2.2447	-3.816	4.5398	-1.9379	2.6185	8.0243	5.991	-2.4659	-0.3752	2.1541	3.5086	1.7097	-0.4921	-4.6082	1.1382	-6.5064	-5.0116	-5.0116	5.3352	-1.5522	-4.035	2.9186	8.0859	1.412	-4.6082	1.334	-9.9658	-9.9658	-9.9658	-2.2447	1.8604	-9.9658
LGG	TCGA-S9-A7R7-01	2.73123	2.1894	-2.6349	-1.7809	0.4865	6.5638	-0.1828	7.2483	4.9184	-1.3921	0.2522	-2.114	-9.9658	-9.9658	-3.1714	-0.9971	-3.3076	-1.9942	5.9771	-1.9942	4.1836	7.6827	6.9896	-2.1779	0.5763	5.2969	6.2852	2.2051	0.2154	-2.7274	2.5828	-3.0469	-9.9658	-1.9379	5.2574	1.6281	0.2154	4.585	8.6349	4.97	-4.2934	2.8321	-9.9658	-9.9658	-9.9658	-0.2845	1.934	-3.3076
LGG	TCGA-DU-6402-01	3.59931	1.1447	-3.1714	-3.0469	3.6405	7.7897	-2.0529	5.8919	3.9965	0.03	-0.6643	-6.5064	-3.458	-9.9658	-4.6082	0.0158	-0.2159	-0.7346	5.9388	-1.3921	7.1857	7.1479	5.5059	-4.035	2.6395	3.6089	5.0423	3.944	1.8564	-1.9379	2.5876	-1.3921	4.3541	-3.6259	5.7512	2.945	2.0147	4.1875	8.5516	4.9251	-2.0529	2.1411	-9.9658	-9.9658	-3.6259	-0.0574	2.2783	-3.3076
LGG	TCGA-HT-7684-01	1.38957	0.517	-3.3076	-4.035	-0.9686	4.1506	-6.5064	5.0824	3.3506	-9.9658	-2.3884	-9.9658	-9.9658	-6.5064	-6.5064	-2.0529	-2.2447	-5.5735	4.4223	-5.0116	4.4483	8.1137	6.3237	-4.2934	-3.458	1.4228	2.3394	0.099	-1.7809	-5.5735	1.9377	-9.9658	-2.5479	-9.9658	5.8627	-3.1714	-3.816	2.0569	8.0079	4.4861	-9.9658	0.3115	-9.9658	-5.5735	-9.9658	-3.1714	1.7097	-9.9658
LGG	TCGA-HT-8104-01	4.218	2.3222	-2.3884	-1.685	1.7828	6.3853	-2.4659	7.7798	4.2548	0.1903	-1.0559	-4.6082	-1.1811	-9.9658	-5.5735	-2.3147	-2.9324	-1.8314	4.8069	-2.0529	5.7522	6.4769	5.6654	-1.685	0.3573	4.6358	5.684	2.3251	-1.3183	-3.6259	2.0289	-3.458	0.3115	-2.2447	6.4816	4.0304	1.8119	4.4183	9.4032	4.6753	-4.6082	2.3536	-9.9658	-9.9658	-4.2934	0.2154	2.7826	-9.9658
LGG	TCGA-FN-7833-01	2.99462	1.412	-5.5735	-0.2671	2.3394	5.6625	-0.8599	7.5576	5.1148	-1.5951	2.4544	-1.8314	-2.9324	-9.9658	-4.6082	1.9527	-0.7834	-1.9379	5.3147	-2.8262	4.6259	7.0633	6.9954	-2.5479	-0.8339	5.0444	4.7576	2.1147	-1.3921	-1.9379	3.1311	-5.5735	-3.1714	0.6332	5.8402	4.7549	-1.5951	4.1644	8.8816	3.6849	-4.035	-0.2328	-9.9658	-9.9658	-9.9658	0.5568	6.0555	-5.0116
LGG	TCGA-HT-7473-01	2.62994	1.0779	-1.7809	1.196	1.196	5.2788	-1.3183	8.7887	5.225	-2.7274	1.3109	-5.5735	-9.9658	-9.9658	-9.9658	-0.7346	-1.4699	0.605	5.3709	-1.0262	3.5875	6.8841	7.0519	-2.2447	1.2147	4.1587	5.9093	2.7249	0.2277	-2.4659	2.3451	-3.458	-5.0116	-2.5479	5.4624	2.3508	-0.7588	4.4169	8.9677	4.2048	-2.9324	1.683	-9.9658	-9.9658	-9.9658	0.2642	2.2175	-4.035
LGG	TCGA-HT-8019-01	2.23879	1.4859	-2.2447	-6.5064	-0.4131	3.3364	-2.9324	4.3292	1.3791	-9.9658	-6.5064	-2.0529	-9.9658	-9.9658	-9.9658	-1.3548	-3.0469	-5.5735	2.694	-3.816	3.6827	6.6163	5.3352	-3.458	-1.9379	1.8564	1.4911	-2.114	-1.0559	-4.6082	1.5998	-9.9658	-9.9658	-5.5735	6.1819	-2.3884	-5.0116	2.4805	7.5336	-0.0725	-6.5064	1.1706	-4.2934	-9.9658	-5.5735	-3.1714	0.4865	-9.9658
LGG	TCGA-TQ-A7RU-01	3.80945	2.9375	-5.5735	-6.5064	-1.9379	5.2388	-5.5735	5.3968	1.5064	-3.1714	-4.035	-3.1714	-9.9658	-5.5735	-9.9658	0.0854	-4.6082	-0.5543	4.0091	-2.0529	4.867	7.0879	4.1994	-2.114	-0.6643	3.3076	3.034	0.679	0.0014	-2.5479	1.1897	-4.6082	-4.6082	-9.9658	5.6708	-1.0559	-1.5522	3.2297	8.8979	0.7664	-9.9658	0.2998	-9.9658	-9.9658	-9.9658	-5.0116	-0.9406	-9.9658
LGG	TCGA-DB-A4XF-01	2.88753	1.0847	-3.816	-2.6349	1.0293	5.0713	-4.2934	7.0947	3.3731	-4.035	-3.0469	-3.458	-9.9658	-9.9658	-9.9658	-1.4305	-3.816	-4.6082	4.5485	-2.3884	3.2435	7.1228	6.2283	-0.9971	-0.9971	4.3744	5.0794	-0.1993	-1.4699	-6.5064	1.2636	-4.6082	-9.9658	-9.9658	6.0734	-2.0529	-1.3921	3.1908	8.9046	2.0535	-5.0116	0.7321	-3.816	-9.9658	-9.9658	-5.5735	-0.7108	-9.9658
LGG	TCGA-FG-A713-01	2.68928	1.6093	-1.8314	-4.035	-1.0862	3.9365	-2.6349	5.243	1.7053	-2.8262	-3.3076	-2.5479	-9.9658	-9.9658	-9.9658	-1.5951	-5.0116	-6.5064	3.4061	-2.3147	4.1676	6.7608	5.5629	-3.458	-2.9324	2.362	2.05	-0.5125	-2.5479	-3.6259	1.5563	-9.9658	-9.9658	-9.9658	6.4927	-1.9379	-2.9324	2.3337	8.0886	1.2085	-9.9658	2.7095	-3.6259	-9.9658	-9.9658	-6.5064	-1.4305	-9.9658
LGG	TCGA-E1-A7YL-01	3.79905	1.4808	-4.6082	-2.4659	0.7146	6.1611	0.5859	4.4861	4.5711	-2.0529	0.6608	-2.8262	-9.9658	-5.5735	-5.5735	1.334	0.4967	-0.6643	5.0401	-0.7834	9.7459	7.3601	5.9656	-5.0116	2.0289	4.5808	5.3978	3.4868	1.6234	-1.8836	1.8801	-2.8262	-0.2159	-3.1714	5.0171	2.128	1.9712	3.2526	8.1991	4.5386	-2.5479	1.7185	-9.9658	-5.5735	-5.5735	-0.7108	0.5568	-9.9658
LGG	TCGA-CS-5396-01	3.53109	0.9115	-3.458	-5.5735	-0.5973	4.9528	-2.8262	4.7247	2.5413	-1.8836	-0.3566	-3.816	-9.9658	-5.5735	-4.6082	-0.5973	-2.6349	-0.7346	3.5224	-1.7322	5.745	8.1034	4.8243	-2.5479	-0.5543	4.4803	4.4861	1.5165	0.2522	-1.1811	1.2209	-4.035	-3.816	-2.6349	4.8535	-0.5973	0.0854	3.3591	8.6957	2.8994	-5.0116	0.2154	-9.9658	-5.0116	-9.9658	-6.5064	-1.685	-9.9658
LGG	TCGA-HW-8322-01	4.0152	1.0007	-1.7322	-1.8836	-1.4699	5.2694	-3.0469	6.5192	2.4779	-1.0862	-3.0469	-2.3147	-9.9658	-5.5735	-9.9658	0.4967	-3.3076	1.3956	3.4856	0.6608	2.6371	6.0792	5.119	-0.1993	-0.1187	3.2282	3.1145	0.9642	-0.6873	-2.3147	1.2636	-4.2934	-5.0116	-3.1714	5.3259	-0.1187	-1.0262	3.5237	9.3566	1.8762	-5.0116	1.0503	-9.9658	-9.9658	-9.9658	-5.5735	0.9493	-9.9658
LGG	TCGA-S9-A6U9-01	2.43023	1.8242	-4.2934	-2.9324	-0.2845	5.0588	-3.3076	7.0948	4.2884	-5.5735	-1.8314	-2.9324	-9.9658	-5.5735	-9.9658	0.3685	0.4552	-3.0469	5.927	-1.7809	3.906	7.3139	7.5937	-3.3076	-0.4921	2.4857	3.1129	1.5465	-1.0559	-3.1714	2.1444	-3.6259	-3.816	-3.3076	5.1231	-1.685	-0.9686	3.9617	8.7398	3.4817	-5.5735	1.6466	-9.9658	-9.9658	-9.9658	-0.1504	4.4667	-9.9658
LGG	TCGA-HT-7676-01	3.01439	1.3679	-5.5735	-1.9379	-0.1665	5.4145	-2.6349	7.765	4.8739	-4.6082	-0.1187	-2.3884	-9.9658	-9.9658	-9.9658	-0.9406	-3.6259	-3.458	5.1482	-2.3884	3.309	7.046	6.7552	-0.9686	-1.7809	4.0366	4.8069	0.9716	-1.6394	-5.5735	2.5188	-6.5064	-9.9658	-3.6259	4.8207	-1.7809	-3.816	4.0584	9.1244	2.1894	-5.0116	2.0638	-9.9658	-9.9658	-9.9658	-1.0262	1.3901	-9.9658
LGG	TCGA-HT-7469-01	3.78976	2.6895	-9.9658	-5.0116	0.058	7.1059	-2.5479	7.2007	3.8023	-3.458	-3.3076	-2.8262	-1.9379	-5.5735	-4.6082	0.8164	-2.8262	-3.3076	4.7143	-1.5951	6.2629	7.0367	5.3118	-3.458	-2.0529	5.3848	4.5255	-0.2671	-1.1811	-6.5064	1.2147	-5.0116	-3.816	-2.7274	4.1652	0.1648	-1.1811	3.9185	9.4441	1.3397	-6.5064	0.4447	-9.9658	-9.9658	-9.9658	-1.5951	1.7141	-9.9658
LGG	TCGA-HT-7478-01	2.79288	1.5415	-1.3183	-1.5105	0.3231	5.7071	-1.1488	7.2654	5.3848	-1.5522	0.547	-3.816	-9.9658	-2.8262	-5.0116	-0.1828	-0.9406	0.5568	5.2354	-1.1172	3.1507	6.7396	6.8178	-2.3884	2.1378	5.432	6.1973	3.7909	-0.8084	-2.0529	2.7615	-2.114	-3.1714	-3.1714	6.1295	3.074	0.7146	4.6206	8.7125	4.0118	-3.458	3.0995	-9.9658	-5.5735	-4.035	0.1388	4.5565	-9.9658
LGG	TCGA-DU-A5TW-01	2.33342	2.4883	-3.1714	-4.2934	-0.3201	4.7898	-5.5735	7.5	3.1028	-9.9658	-2.3884	-2.2447	-9.9658	-9.9658	-9.9658	0.4447	-4.035	-3.816	4.7263	-2.7274	3.6359	7.6531	6.0162	0.24	-3.6259	3.0074	4.0198	-2.2447	-1.9942	-2.1779	0.8408	-9.9658	-9.9658	-4.2934	5.4483	-2.3147	-4.2934	3.29	8.7975	2.3564	-9.9658	0.2522	-9.9658	-9.9658	-9.9658	-3.458	0.1903	-9.9658
LGG	TCGA-S9-A6TX-01	2.83594	1.3283	-9.9658	-3.3076	-1.5951	4.3834	-4.035	4.8861	2.1606	-2.3884	-3.458	-3.1714	-2.6349	-9.9658	-5.0116	-1.685	-3.6259	-3.1714	3.6254	-1.5522	4.5699	7.4438	5.703	-4.2934	-4.035	3.5547	3.6939	-0.4325	-1.0862	-4.6082	0.8961	-6.5064	-9.9658	-3.816	5.2873	-4.035	-3.1714	2.7227	8.7829	0.6608	-9.9658	1.9895	-9.9658	-9.9658	-9.9658	-5.5735	-2.9324	-9.9658
LGG	TCGA-RY-A83Z-01	3.77928	1.7744	-2.7274	-4.035	-3.458	5.9941	-2.5479	5.7913	3.4183	-9.9658	-3.6259	-4.6082	-9.9658	-9.9658	-9.9658	1.2934	-9.9658	-5.0116	4.6994	-4.035	2.3843	7.9927	5.85	0.9115	-3.816	3.0145	3.2572	0.3907	-0.9132	-6.5064	1.2992	-9.9658	-5.0116	-5.0116	5.5223	-5.5735	-6.5064	2.6418	8.531	1.0503	-5.5735	0.7579	-9.9658	-9.9658	-9.9658	-2.6349	0.24	-9.9658
LGG	TCGA-FG-A6IZ-01	3.10435	1.5758	-9.9658	-6.5064	-2.3147	5.2694	-3.458	3.7667	2.296	-1.9379	-3.816	-3.816	-9.9658	-9.9658	-5.0116	0.1903	-3.1714	-2.114	3.5596	-1.9942	2.2113	8.1086	5.2192	-2.3884	-1.3921	3.0074	5.178	0.5271	-0.0574	-5.5735	0.688	-9.9658	-5.0116	-6.5064	5.1672	-1.7809	-2.5479	2.6441	7.3955	0.9493	-5.0116	0.9493	-9.9658	-9.9658	-9.9658	-9.9658	-2.114	-9.9658
LGG	TCGA-CS-4941-01	3.48675	4.439	-1.8836	-0.9406	2.6579	5.3345	-2.6349	7.1483	5.3223	1.4859	0.6608	-9.9658	-9.9658	-4.2934	-4.6082	0.9191	-0.7588	0.5955	5.2188	-0.6416	5.2468	7.5668	6.2882	-3.6259	2.0147	5.4506	6.6703	3.9892	1.196	-1.8836	2.982	-1.685	-1.3548	-0.8084	5.5466	6.0555	2.1541	4.4764	8.6986	4.096	-1.8314	2.299	-9.9658	-9.9658	-3.816	-0.0574	1.5514	-9.9658
LGG	TCGA-DH-A7UT-01	2.22651	1.2756	-4.2934	-3.6259	-0.7346	4.981	-3.6259	5.5305	3.716	-9.9658	-0.2671	-1.8836	-2.114	-9.9658	-9.9658	-0.5973	-3.3076	-4.2934	5.5148	-3.816	3.8451	6.9602	6.3031	-0.6643	-3.0469	3.4596	3.2251	-2.9324	-1.1811	-9.9658	1.7053	-9.9658	-9.9658	-4.2934	7.1818	-3.458	-5.0116	3.1556	8.2483	2.0218	-9.9658	2.5876	-9.9658	-9.9658	-4.035	-0.1504	2.7073	-9.9658
LGG	TCGA-DU-5871-01	2.08066	1.2934	-2.0529	-2.7274	0.1648	4.7955	-2.5479	7.669	3.9232	-9.9658	0.1648	-3.816	-9.9658	-5.5735	-9.9658	-0.6643	-2.9324	-4.2934	5.4403	-2.7274	3.9337	7.3443	6.0328	-3.458	-2.3147	2.7292	2.3077	0.1257	-1.9942	-2.9324	2.5363	-5.0116	-1.9379	-3.6259	5.9517	0.9419	-4.2934	3.7248	8.5768	4.0985	-9.9658	0.7748	-9.9658	-9.9658	-9.9658	-0.1504	3.6838	-9.9658
LGG	TCGA-HW-8321-01	2.42495	1.5661	-3.3076	-2.5479	0.0854	5.5799	-3.0469	8.1416	3.5791	-2.3147	-9.9658	-2.8262	-9.9658	-4.6082	-3.3076	0.6608	1.334	-2.1779	4.6242	-3.3076	5.4483	6.8421	5.5796	-1.1172	-1.4699	3.3464	3.8441	0.6517	-1.4305	-2.6349	1.7316	-9.9658	-5.0116	-1.2142	7.8885	1.8444	-1.8314	3.6759	8.6571	6.1601	-5.5735	3.5766	-9.9658	-5.5735	-5.5735	-2.3884	4.1219	-9.9658
LGG	TCGA-EZ-7264-01	3.83993	1.0915	-3.0469	-3.6259	-1.5951	5.2122	-4.035	5.8849	1.766	-9.9658	-5.0116	-2.9324	-9.9658	-6.5064	-9.9658	-0.5125	-3.0469	-2.4659	2.9071	-1.9942	3.5863	6.2464	4.4667	-3.1714	-2.114	4.2795	3.831	-0.8339	-0.6643	-3.0469	0.517	-9.9658	-9.9658	-3.816	4.9603	-1.9942	-4.035	2.9581	8.8327	1.1706	-9.9658	-0.394	-9.9658	-9.9658	-9.9658	-2.6349	0.7748	-9.9658
LGG	TCGA-CS-6666-01	2.84998	2.8137	-5.5735	-3.816	-0.1828	6.0222	-6.5064	7.3672	3.2174	-3.458	-1.2828	-3.3076	-9.9658	-5.5735	-9.9658	-0.3201	-3.0469	0.6145	4.4417	-3.458	4.2929	6.8776	5.6156	-1.7809	-0.1993	2.6067	3.4477	2.0004	-1.1811	-2.3147	2.3451	-5.5735	-3.6259	-2.8262	6.9835	1.5316	-0.2845	3.695	8.6173	3.1393	-6.5064	1.7141	-9.9658	-9.9658	-9.9658	-2.3884	1.8957	-9.9658
LGG	TCGA-HW-7491-01	3.83184	1.6187	-2.114	-4.035	-2.3884	5.0955	-4.6082	6.8751	1.9895	-9.9658	-5.0116	-5.0116	-9.9658	-9.9658	-4.2934	-1.4699	-4.6082	-2.3884	2.6556	-2.9324	5.7222	6.8207	4.9218	-1.9379	-2.6349	2.93	3.4197	-0.1993	-1.1488	-3.458	0.6608	-6.5064	-9.9658	-4.6082	4.8043	-5.5735	-2.0529	3.4958	8.4157	0.4233	-6.5064	0.1903	-9.9658	-9.9658	-9.9658	-6.5064	-2.3884	-9.9658
LGG	TCGA-S9-A6U1-01	3.47892	2.2633	-3.0469	-4.2934	0.1903	5.6868	-3.6259	7.4752	4.2404	-9.9658	-2.3147	-1.9942	-2.2447	-9.9658	-9.9658	0.5271	-4.6082	-3.458	5.2548	-2.8262	4.9626	7.3381	6.2533	-3.0469	-2.3147	3.9223	3.9356	-0.0425	-1.2828	-3.816	1.8722	-5.5735	-4.6082	-4.2934	5.5711	-1.2142	-6.5064	4.0696	9.1324	1.9931	-6.5064	1.3511	-3.0469	-9.9658	-9.9658	-2.4659	2.9469	-9.9658
LGG	TCGA-E1-5307-01	3.00362	0.537	-4.6082	-5.0116	0.4233	4.7603	-2.114	7.1924	3.7646	-9.9658	-1.5522	-4.2934	-9.9658	-9.9658	-9.9658	-2.114	-2.9324	-5.0116	4.9837	-3.6259	2.6464	7.0834	7.0264	-1.4699	-9.9658	3.6883	3.8611	-2.4659	-1.8314	-6.5064	1.3846	-9.9658	-9.9658	-5.5735	4.5293	-4.2934	-6.5064	3.8481	8.6372	1.7229	-6.5064	0.8408	-9.9658	-9.9658	-9.9658	-1.6394	1.7185	-9.9658
LGG	TCGA-DU-A76L-01	3.89042	1.5013	-0.6416	-2.4659	3.0808	7.2075	-3.1714	4.5417	4.9987	1.2576	0.6969	-4.2934	-3.816	-4.035	-4.6082	-0.3022	-1.7322	-0.6873	5.6077	-3.6259	9.7802	7.3454	5.0023	-2.7274	0.7916	5.7493	6.6181	2.4857	-1.0559	0.8568	3.5982	-3.3076	3.9468	-1.3921	5.6511	4.6077	1.1577	4.9824	8.8971	6.244	-4.6082	3.3535	-4.035	-9.9658	-9.9658	0.1257	3.5374	-9.9658
LGG	TCGA-HW-7495-01	3.00004	1.0007	-3.0469	-1.9942	-0.4719	4.3477	-2.5479	7.4055	2.4623	-9.9658	-2.2447	-3.3076	-9.9658	-9.9658	-9.9658	-1.8314	-5.0116	-3.458	3.4251	0.1388	4.3306	6.7491	6.3447	-2.1779	-9.9658	3.7116	3.1079	-1.4699	-1.4305	-9.9658	1.3623	-5.5735	-9.9658	-4.2934	6.2531	-4.035	-3.1714	2.9929	8.7208	1.2147	-6.5064	2.9729	-9.9658	-5.0116	-9.9658	-3.816	0.9191	-9.9658
LGG	TCGA-CS-6669-01	2.67129	0.6239	-1.7809	-4.6082	-1.3548	3.2435	-4.6082	4.756	1.4756	-9.9658	-3.3076	-3.0469	-9.9658	-9.9658	-9.9658	-4.6082	-5.5735	-9.9658	2.667	-5.0116	3.6725	6.1629	5.922	-4.6082	-5.0116	1.2085	-1.3921	-1.3183	-1.5105	-6.5064	1.5415	-5.5735	-9.9658	-6.5064	6.7211	-2.1779	-9.9658	2.296	7.5848	0.2998	-6.5064	1.8918	-9.9658	-9.9658	-9.9658	-2.9324	-1.1172	-9.9658
LGG	TCGA-HT-7481-01	3.64957	1.2576	-3.0469	-2.3884	-1.3183	4.7656	-2.6349	6.2103	2.3222	-9.9658	-3.816	-9.9658	-9.9658	-9.9658	-9.9658	-1.5951	-4.035	-5.0116	3.3278	-0.1828	4.1571	6.5461	6.0034	-1.5105	-2.0529	3.795	0.8568	0.4233	-1.3921	-3.816	1.0503	-9.9658	-9.9658	-9.9658	5.1322	-2.3147	-3.1714	2.9618	8.9206	0.9038	-6.5064	2.5087	-9.9658	-5.0116	-9.9658	-3.3076	0.6332	-9.9658
LGG	TCGA-DU-8163-01	3.31619	1.8879	-4.6082	-0.5125	0.6332	5.3719	-0.9686	7.5939	4.7296	-4.2934	-0.1187	-2.8262	-9.9658	-9.9658	-5.5735	-0.4131	-2.6349	-2.3147	5.2676	-1.4305	3.4517	6.7807	6.9101	-0.5756	0.9038	3.9552	3.5682	1.683	-0.5332	-3.0469	2.7487	-0.6193	-9.9658	-3.3076	5.7819	-0.4521	-2.114	4.7453	8.9107	2.5388	-2.6349	2.6828	-9.9658	-9.9658	-9.9658	-0.6416	2.9984	-3.816
LGG	TCGA-HT-8110-01	3.97359	0.4552	0.058	0.7579	1.6558	5.5451	-1.3548	8.6228	5.6966	-0.9406	0.4657	-4.035	-9.9658	-5.0116	-9.9658	-0.5973	-0.4921	-0.1031	5.2947	0.5763	4.7682	7.2648	6.6135	-2.9324	1.642	4.9002	6.332	2.6647	-0.3022	-2.3884	2.8602	-2.4659	-3.816	-0.9406	5.2784	4.1302	2.4675	4.9695	8.6413	3.3856	-3.458	2.6556	-9.9658	-9.9658	-5.5735	0.058	2.4649	-9.9658
LGG	TCGA-RY-A840-01	3.50079	1.6281	-4.035	-5.5735	-1.8836	4.916	-6.5064	7.4355	0.8246	-9.9658	-4.2934	-4.6082	-9.9658	-5.5735	-9.9658	-0.3752	-9.9658	-4.2934	3.2251	-1.9379	3.2236	7.8154	3.8973	-2.2447	-3.3076	2.8442	2.9784	-0.4719	-0.4131	-5.5735	-0.394	-5.5735	-9.9658	-5.5735	6.4108	-3.3076	-4.2934	2.9469	8.7308	0.099	-9.9658	-1.3921	-9.9658	-9.9658	-9.9658	-9.9658	-1.685	-9.9658
LGG	TCGA-VM-A8C9-01	2.77398	1.3623	-5.5735	-3.816	-0.2845	5.6966	-3.3076	3.3379	4.5503	-2.114	-1.3548	-3.458	-9.9658	-5.5735	-9.9658	0.1648	-2.7274	-1.5951	6.6758	-4.035	1.6649	8.3074	7.2086	-3.6259	1.9527	3.1393	4.0875	4.14	0.8164	-3.458	2.4675	-3.1714	-9.9658	-9.9658	5.3198	-0.4131	-2.4659	3.2205	7.5313	4.4257	-4.2934	1.9415	-9.9658	-9.9658	-5.5735	-3.3076	0.1388	-9.9658
LGG	TCGA-HW-8319-01	3.47638	1.8918	-2.0529	-2.3147	0.7664	5.2736	-3.0469	9.0638	3.6359	-5.5735	-0.3752	-5.5735	-9.9658	-5.5735	-5.0116	-0.5756	-5.0116	-4.6082	4.466	-1.8836	4.811	6.8797	6.2517	-1.2828	-2.5479	4.3765	4.722	-1.2142	-2.114	-5.0116	1.7009	-9.9658	-3.816	-4.6082	5.8914	-1.7809	-3.816	4.3242	9.0096	2.9013	-6.5064	0.8961	-9.9658	-5.0116	-9.9658	1.949	5.572	-9.9658
LGG	TCGA-HT-7482-01	2.39506	0.6425	-3.458	-1.8836	0.7058	5.1115	-2.2447	7.0402	4.857	-5.5735	-0.3566	-3.458	-9.9658	-9.9658	-9.9658	-1.6394	-5.0116	-4.6082	4.7777	-2.9324	4.1692	7.0029	6.3872	-2.9324	-1.5951	3.2282	3.716	0.2029	-2.0529	-3.458	2.4171	-5.0116	-9.9658	-4.6082	5.3705	-1.8314	-5.0116	4.2951	8.4422	3.1045	-6.5064	2.1606	-9.9658	-5.5735	-9.9658	0.099	4.0375	-9.9658
LGG	TCGA-QH-A6CW-01	3.01255	2.0254	-5.5735	-3.458	-0.7834	5.8301	-3.458	6.6712	3.7836	-4.2934	-2.9324	-1.7809	-9.9658	-9.9658	-9.9658	1.2147	-0.6643	-4.6082	5.7782	-2.1779	5.4912	6.8132	7.5963	-1.9942	-1.3921	2.081	3.0808	0.3346	-0.8599	-4.6082	1.8078	-2.0529	-9.9658	-2.0529	5.3893	-3.0469	-4.6082	3.2389	8.9568	3.1011	-6.5064	1.7229	-9.9658	-9.9658	-9.9658	-1.4699	5.4165	-9.9658
LGG	TCGA-DU-5870-01	3.45419	1.46	-3.1714	-1.8836	-1.1488	5.2265	-1.6394	8.3123	3.5287	-9.9658	-4.2934	-2.7274	-9.9658	-9.9658	-9.9658	-1.8314	-0.9971	-2.1779	4.404	1.2209	4.4542	7.1282	6.2612	-1.8314	-1.3921	4.2048	4.4189	1.125	-1.8314	-3.458	1.7141	-4.035	-4.6082	-4.6082	5.1958	-1.5105	-2.114	3.7324	8.7509	1.2756	-4.6082	1.2209	-9.9658	-9.9658	-5.5735	-4.2934	-0.5332	-9.9658
LGG	TCGA-TM-A84S-01	3.37298	1.1316	-4.2934	-3.816	0.0158	4.7793	-3.6259	7.0646	3.2511	-9.9658	-2.7274	-2.3147	-4.035	-5.5735	-9.9658	-0.7346	-2.4659	-1.1488	4.5898	0.5666	4.0584	7.5204	6.0266	-1.3183	-0.7588	4.347	4.7798	1.1316	-0.6416	-5.5735	1.1184	-5.5735	-9.9658	-4.6082	5.3413	-1.2481	-1.0559	3.3549	8.3334	2.2482	-9.9658	1.0573	-4.6082	-9.9658	-9.9658	-1.8836	0.4125	-9.9658
LGG	TCGA-RY-A845-01	3.20323	1.5563	-3.3076	-3.816	-0.1187	4.9322	-1.8836	7.9547	3.5098	-2.1779	-3.3076	-2.7274	-4.035	-5.5735	-9.9658	-0.8863	-4.6082	-5.0116	4.7725	-2.3147	3.2435	7.3223	6.6967	0.0718	-2.8262	4.3744	5.2521	-0.9406	-1.2828	-9.9658	1.0915	-9.9658	-5.0116	-4.6082	5.8927	-1.8314	-6.5064	3.7593	8.964	1.7489	-9.9658	1.4281	-9.9658	-5.0116	-9.9658	-2.6349	1.5216	-9.9658
LGG	TCGA-FG-8182-01	3.18747	2.0395	-9.9658	-4.6082	0.2522	5.2111	-2.7274	7.2556	4.7377	-9.9658	-1.685	-4.035	-9.9658	-9.9658	-9.9658	0.2277	-4.6082	-6.5064	5.2661	-3.6259	4.1515	6.7357	7.028	-1.5522	-1.4305	3.6136	3.4687	0.434	-1.3183	-6.5064	1.7954	-9.9658	-9.9658	-4.6082	5.23	-3.3076	-3.816	4.3541	9.08	1.7995	-5.5735	2.2082	-9.9658	-4.2934	-9.9658	0.8961	5.6902	-9.9658
LGG	TCGA-FG-6688-01	3.26455	0.2762	-1.8314	-0.9132	0.7321	5.2567	-2.3884	5.1027	4.7496	-2.6349	-2.4659	-3.816	-2.3147	-9.9658	-9.9658	-1.3921	-2.1779	-1.8836	5.2679	-2.3884	4.3463	7.2948	6.5454	-4.2934	-0.8863	3.8177	4.9964	2.1013	-1.5105	-4.2934	1.6281	-3.816	-4.035	-3.6259	5.4013	1.7617	-1.3921	3.7226	8.1116	4.0541	-6.5064	3.4945	-9.9658	-9.9658	-9.9658	-0.5973	1.2934	-9.9658
LGG	TCGA-TQ-A7RP-01	3.46464	1.3567	-1.3548	-2.1779	-0.1504	4.4337	-4.035	6.5853	3.1685	-3.6259	-2.6349	-3.458	-2.8262	-9.9658	-9.9658	-0.8339	-1.1488	-2.7274	5.302	-0.9971	5.5784	7.9968	6.36	-3.816	-0.2498	3.4868	3.1908	2.0946	0.2277	-5.0116	1.1184	-3.0469	-3.458	-3.816	3.8198	-0.7108	-1.2142	3.1653	7.9094	2.5634	-5.5735	2.9637	-9.9658	-4.6082	-9.9658	-2.114	2.0111	-3.3076
LGG	TCGA-HT-8113-01	2.64614	0.9716	-1.3921	-2.7274	0.2154	3.6347	-3.6259	6.2271	1.2455	-9.9658	-2.5479	-2.114	-9.9658	-5.0116	-4.6082	-0.7346	-4.6082	-2.9324	2.876	-2.9324	3.8441	6.4445	5.6918	-4.2934	-0.9132	2.8936	2.6418	1.8242	-0.8863	-3.3076	1.1447	-3.458	-4.6082	-6.5064	6.2182	0.5666	-5.0116	2.7931	8.1123	1.7053	-6.5064	2.1476	-9.9658	-9.9658	-9.9658	-1.2142	2.7161	-9.9658
LGG	TCGA-HT-7689-01	3.02676	0.7493	-2.8262	-2.8262	0.3796	5.3038	-2.7274	6.8986	3.9938	-9.9658	-0.9971	-2.8262	-9.9658	-9.9658	-9.9658	-1.8314	-5.5735	-4.6082	4.8744	-2.4659	3.5982	6.8569	5.8729	-0.7588	-2.3147	4.1474	4.6977	0.6239	-1.3183	-5.0116	1.5612	-5.0116	-4.035	-5.5735	5.4732	2.4063	-2.8262	3.7825	8.5305	2.5948	-4.2934	2.8701	-9.9658	-9.9658	-9.9658	-1.6394	0.3907	-9.9658
LGG	TCGA-FG-7638-01	2.89722	0.9935	-4.035	-4.6082	-1.0862	4.5436	-1.9942	7.9897	1.9931	-5.5735	-3.0469	-5.5735	-9.9658	-5.0116	-5.5735	-2.114	-6.5064	-2.9324	3.1876	-0.4521	3.9506	7.2641	5.104	-3.6259	-0.8863	3.6101	4.3002	0.9419	-1.2828	-6.5064	0.688	-4.6082	-5.0116	-9.9658	6.4194	0.2154	-0.6193	3.1475	8.5777	1.1447	-9.9658	0.688	-9.9658	-9.9658	-9.9658	-3.1714	-1.0862	-9.9658
LGG	TCGA-DU-7013-01	4.40804	1.7009	-5.5735	-1.5522	2.3788	6.2036	-1.3921	8.2163	4.4739	-0.5756	-3.3076	-4.035	-3.458	-5.0116	-9.9658	-0.9971	-1.0862	0.5271	4.5318	-1.7809	5.8724	6.6823	5.6393	-1.5951	0.6517	4.6691	5.0998	2.8199	-0.9406	-1.8836	2.5238	-1.8836	-4.2934	-1.2142	5.2445	4.1764	1.934	4.5009	9.4684	2.5112	-2.2447	1.6327	-9.9658	-9.9658	-5.5735	-1.5105	0.9568	-9.9658
LGG	TCGA-E1-A7Z3-01	3.0179	2.0004	-3.1714	-9.9658	0.24	4.7913	-1.8314	6.6253	3.2541	-9.9658	-2.114	-2.8262	-9.9658	-9.9658	-9.9658	-2.3147	-6.5064	-5.0116	4.8997	-1.7809	5.4912	7.235	6.7103	-2.6349	-2.6349	3.0411	4.0073	-0.2845	-1.5522	-4.6082	1.8604	-9.9658	-3.0469	-3.3076	5.9538	-1.685	-2.4659	3.8249	7.9135	2.6232	-6.5064	1.949	-2.0529	-9.9658	-9.9658	-1.7809	1.9452	-3.816
LGG	TCGA-HT-7476-01	2.85196	1.6093	-3.3076	-2.5479	-0.6416	4.2706	-2.0529	6.1314	2.694	-4.035	-2.114	-3.3076	-9.9658	-5.0116	-9.9658	-0.5332	-4.6082	-3.0469	4.4523	-2.5479	4.2173	6.6883	5.6708	-2.4659	-0.5543	1.5266	1.1316	0.8961	-0.9406	-4.6082	1.7489	-4.2934	-9.9658	-3.6259	5.5355	0.058	-0.8599	3.47	8.5656	2.1147	-5.0116	1.3225	-9.9658	-9.9658	-9.9658	-2.4659	1.9601	-9.9658
LGG	TCGA-TQ-A7RG-01	3.49951	1.2085	-1.685	-4.035	-0.7588	5.206	-3.3076	7.2563	3.2647	-2.3147	-1.8314	-2.8262	-9.9658	-9.9658	-9.9658	-0.0574	-2.9324	-0.4719	4.7587	-1.0862	4.4483	7.3303	5.7112	-2.3884	-0.4325	3.5337	3.7464	1.3109	-0.6193	-1.8836	1.2271	-3.816	-3.3076	-9.9658	5.6918	-0.3383	-1.3548	3.5994	8.8746	2.0111	-5.5735	0.3115	-9.9658	-9.9658	-9.9658	-4.035	1.6281	-9.9658
LGG	TCGA-FG-8181-01	3.04266	1.7141	-2.3147	-6.5064	-0.2159	3.7248	-2.9324	4.3285	2.0465	-3.816	-2.3147	-3.6259	-9.9658	-5.0116	-9.9658	-1.5105	-3.1714	-3.6259	3.0706	-3.458	4.3597	6.2046	5.6691	-2.4659	-1.1811	2.5263	2.753	0.5069	-1.7809	-3.3076	1.9638	-9.9658	-5.0116	-4.035	6.8459	1.3454	-2.7274	2.7721	7.8326	3.4674	-4.035	0.3907	-9.9658	-9.9658	-5.5735	-2.1779	3.287	-9.9658
LGG	TCGA-DU-A7T6-01	3.41008	1.6512	-4.2934	-4.2934	-2.0529	5.2083	-2.8262	3.6125	1.7617	-3.0469	-2.7274	-4.035	-9.9658	-9.9658	-6.5064	0.099	-3.6259	-2.3884	4.0109	-0.9971	4.9156	7.3	4.4816	-1.1811	-0.4719	3.5559	2.236	1.0779	0.6332	-4.6082	2.1313	-3.6259	-1.8836	-4.6082	5.6548	0.8082	-0.4719	3.4556	8.8451	1.4652	-6.5064	1.4228	-9.9658	-9.9658	-9.9658	-4.035	-0.1187	-5.5735
LGG	TCGA-DB-A4XC-01	3.68486	2.118	-1.7809	-1.3921	-0.8863	4.8744	-1.2142	7.7038	4.1788	-9.9658	-0.6193	-0.7588	-9.9658	-9.9658	-9.9658	0.9191	-3.1714	-3.6259	4.9213	-1.1172	3.6793	6.716	6.5898	-0.7588	-1.5522	3.9865	4.4223	1.1706	-1.5951	-3.816	1.3567	-5.0116	-3.816	-9.9658	5.359	0.058	-2.114	3.9515	8.8496	2.4252	-4.6082	1.3167	-9.9658	-9.9658	-9.9658	-1.9379	0.4865	-9.9658
LGG	TCGA-FG-A4MW-01	3.49568	1.683	-1.5522	-9.9658	-0.7108	5.1002	-4.2934	6.6946	3.0217	-1.685	-5.0116	-1.7809	-3.3076	-9.9658	-9.9658	-0.9686	-4.2934	-4.035	4.7735	-3.3076	5.3657	7.4398	5.7877	-1.5951	-3.0469	3.9374	4.8095	0.8246	-1.7809	-4.6082	1.4065	-9.9658	-1.0862	-1.7322	6.399	2.496	0.4657	3.0688	8.5675	2.3704	-5.0116	2.9319	-9.9658	-9.9658	-9.9658	-2.5479	-0.2328	-9.9658
LGG	TCGA-DH-5142-01	3.46856	1.5165	-3.1714	-1.6394	-0.5756	5.5787	-1.5951	7.3537	4.9491	-0.3566	1.2696	-2.6349	-9.9658	-2.0529	-2.0529	-0.9971	-3.0469	0.044	4.6905	-1.1488	4.0824	7.3419	6.9385	-1.4699	3.9983	4.696	5.6303	2.7249	0.058	-2.5479	2.4675	-2.9324	-3.816	-2.7274	5.4925	2.2452	0.346	3.6113	8.3931	3.4318	-3.458	1.5064	-9.9658	-9.9658	-3.458	0.044	3.6894	-9.9658
LGG	TCGA-S9-A6U2-01	3.28536	1.7828	-3.458	-6.5064	-0.4131	4.5142	-2.3884	8.4661	3.5694	-9.9658	-1.685	-5.0116	-9.9658	-9.9658	-5.5735	-1.5105	-3.458	-2.5479	4.5173	1.8201	4.9065	7.2103	5.7488	-3.816	-1.2142	4.504	4.0383	0.1519	-0.6873	-3.816	1.7786	-5.5735	-9.9658	-4.035	5.7263	-1.1488	-2.114	4.0225	8.8694	1.5165	-6.5064	1.0079	-9.9658	-9.9658	-9.9658	-1.6394	3.6657	-9.9658
LGG	TCGA-TQ-A7RH-01	3.01439	2.2019	-3.458	-2.114	0.6969	5.433	-3.458	6.2533	4.2064	-9.9658	-0.4131	-2.114	-2.4659	-9.9658	-5.0116	0.8883	-1.3183	-1.2481	5.2476	-2.6349	4.573	7.6771	6.08	-0.9132	-0.3201	3.9755	3.4143	0.679	-0.5125	-4.035	2.1509	-4.2934	-5.0116	-5.0116	4.7464	0.5271	-3.6259	3.991	8.2471	3.0074	-5.5735	1.2636	-9.9658	-9.9658	-3.458	-1.3548	2.5188	-9.9658
LGG	TCGA-DB-A75M-01	2.40868	2.128	-2.5479	-2.9324	-1.3183	5.2017	-3.6259	7.9424	3.136	-5.5735	-1.8836	-2.7274	-4.035	-9.9658	-9.9658	-0.9971	-5.0116	-2.7274	5.3151	-1.5105	4.3688	7.4254	7.0202	-1.2142	-1.4699	3.1377	3.7571	0.7321	-0.9971	-4.6082	1.787	-5.0116	-9.9658	-9.9658	6.1279	-2.2447	-3.3076	2.6418	8.8761	2.3135	-5.5735	0.4761	-9.9658	-9.9658	-9.9658	-2.114	-0.1187	-9.9658
LGG	TCGA-HT-8012-01	2.88364	2.0218	-2.1779	-5.0116	-0.6873	4.1756	-2.5479	5.5802	2.8199	-5.5735	-1.1811	-1.5105	-9.9658	-9.9658	-9.9658	-0.0425	-4.035	-1.9379	4.0462	-1.4305	4.0019	6.6925	5.8258	-3.1714	-2.7274	4.5553	2.9747	-0.394	-0.9686	-1.8836	1.2756	-4.6082	-5.0116	-4.6082	5.7458	-3.816	-3.6259	3.1523	8.6206	2.183	-9.9658	0.3231	-4.2934	-4.2934	-9.9658	-3.6259	1.4652	-9.9658
LGG	TCGA-S9-A7QW-01	3.09596	1.3791	-9.9658	-9.9658	-2.3147	5.0113	-4.6082	7.708	2.3193	-9.9658	-4.6082	-2.9324	-9.9658	-9.9658	-9.9658	-0.7588	-3.6259	-9.9658	4.2609	-3.6259	3.1011	7.3241	4.8679	-1.1172	-3.816	3.4424	3.6136	-1.4305	-1.2828	-9.9658	0.2762	-5.5735	-4.6082	-5.5735	6.2321	-2.9324	-5.0116	3.1876	9.0426	0.1903	-6.5064	0.3346	-9.9658	-9.9658	-9.9658	-0.8339	2.9109	-9.9658
LGG	TCGA-P5-A733-01	2.02148	0.8327	-3.1714	-4.2934	-0.2159	3.1245	-4.2934	7.0729	0.9716	-9.9658	-3.816	-5.5735	-9.9658	-9.9658	-9.9658	-2.4659	-9.9658	-4.2934	3.3814	-2.4659	3.8531	7.2407	5.1031	-2.2447	-3.3076	2.4386	3.242	-1.3183	-3.1714	-5.5735	0.7233	-6.5064	-9.9658	-9.9658	4.849	-3.458	-6.5064	2.8681	8.3512	1.4756	-6.5064	-0.4325	-9.9658	-9.9658	-9.9658	-2.3147	1.9034	-9.9658
LGG	TCGA-E1-A7Z4-01	2.41951	1.2209	-4.035	-1.5105	-0.4719	4.4549	-5.0116	7.9626	4.1724	-1.7809	-0.1031	-5.5735	-9.9658	-9.9658	-9.9658	-1.9379	-3.3076	-1.7322	5.5555	-2.9324	2.9893	8.0425	6.4603	-2.6349	-2.5479	2.9637	3.8157	-1.0262	-0.8339	-3.458	2.4779	-9.9658	-9.9658	-3.0469	4.8253	-0.2498	-1.8314	3.838	8.9814	2.3308	-6.5064	0.7321	-9.9658	-9.9658	-9.9658	-0.6416	2.3222	-9.9658
LGG	TCGA-DU-A5TR-01	2.01432	1.5902	-2.1779	-2.4659	-0.4719	5.5355	-0.6873	6.2902	4.4848	-1.2142	0.6239	-1.9379	-2.5479	-1.7809	-2.1779	0.9935	-1.5105	-0.4921	5.6396	-2.4659	3.3938	7.4069	6.3832	-1.0262	3.421	4.061	4.8837	3.055	0.7233	-4.2934	2.6828	-3.3076	-3.458	-2.0529	5.4219	1.1117	-0.3201	3.1112	7.8309	3.5535	-4.2934	2.2603	-9.9658	-9.9658	-4.6082	2.2144	5.7605	-9.9658
LGG	TCGA-FG-8185-01	2.50843	2.05	-3.816	-3.0469	-1.3548	4.7421	-3.0469	7.1671	2.0183	-4.2934	-2.5479	-2.6349	-9.9658	-9.9658	-9.9658	0.4016	-2.3147	-5.5735	4.3513	-4.6082	4.5423	6.6234	5.4667	-1.8836	-3.816	3.2707	4.5528	-1.0262	-1.9942	-5.0116	1.0503	-6.5064	-9.9658	-5.0116	6.0751	-2.3884	-3.6259	3.1294	8.8486	1.6558	-6.5064	0.9343	-9.9658	-9.9658	-9.9658	-0.7108	4.0593	-9.9658
LGG	TCGA-HW-8320-01	2.39783	1.6785	-3.1714	-1.9942	0.2762	5.3622	-2.7274	8.3864	3.7204	-5.5735	-0.7834	-2.8262	-4.035	-9.9658	-5.5735	-0.1031	-0.8084	-4.6082	4.9364	-3.0469	4.6955	6.5256	6.0911	-1.5522	-3.816	3.0723	4.0445	-0.0425	-1.5951	-4.035	1.5514	-5.5735	-9.9658	-4.6082	6.6878	-0.5332	-2.114	3.8095	8.778	2.6579	-9.9658	0.7407	-9.9658	-9.9658	-5.5735	0.7664	6.0534	-9.9658
LGG	TCGA-CS-6667-01	2.00357	1.9527	-3.0469	-3.6259	-0.8339	4.3075	-1.9942	7.3237	2.7051	-9.9658	-0.5973	-3.816	-3.458	-5.0116	-9.9658	-1.8836	-5.5735	-4.6082	4.0427	-3.816	4.7913	6.6611	6.5186	-1.685	-2.0529	2.6918	3.0774	-0.013	-2.9324	-3.1714	1.6964	-9.9658	-3.3076	-6.5064	5.6032	-2.5479	-3.3076	3.8491	8.5457	1.8282	-9.9658	0.2277	-9.9658	-9.9658	-9.9658	-3.6259	-0.7834	-9.9658
LGG	TCGA-DU-5849-01	2.79699	1.5563	-4.6082	-4.6082	-0.4719	4.6787	-3.0469	6.7335	2.5658	-4.035	-1.4699	-3.1714	-9.9658	-9.9658	-9.9658	-1.3183	-3.3076	0.0158	3.6289	-2.5479	3.7635	6.9029	5.133	-2.6349	-0.1504	3.5498	4.1923	1.3679	-0.7834	-3.1714	1.7744	-5.0116	-5.0116	-4.6082	6.1681	0.547	-2.9324	2.7951	8.6545	2.685	-5.5735	2.2723	-9.9658	-9.9658	-9.9658	-1.1488	2.2663	-9.9658
LGG	TCGA-DB-5279-01	3.13754	1.3225	0.099	-3.816	-0.3201	3.9682	-4.035	6.1412	1.9149	-3.458	-2.1779	-3.0469	-9.9658	-4.6082	-4.035	-1.9379	-3.0469	-1.2828	3.6646	0.9642	4.6041	7.0111	5.2969	-5.5735	0.4865	3.5349	3.6219	3.0446	-0.8863	-2.3884	1.1833	-3.1714	-3.458	-4.6082	5.1891	-0.4325	-1.7322	2.6441	8.7448	1.5415	-5.0116	0.2522	-9.9658	-9.9658	-9.9658	-0.6416	4.9778	-9.9658
LGG	TCGA-CS-6670-01	3.35899	1.1706	-9.9658	-6.5064	-1.2142	4.5205	-9.9658	5.7706	0.7832	-9.9658	-2.114	-3.458	-9.9658	-5.5735	-9.9658	-1.4699	-5.0116	-9.9658	3.5337	-1.5951	3.1844	6.8227	6.5248	-2.114	-9.9658	2.7508	3.1344	-0.8084	-1.8836	-9.9658	0.6699	-9.9658	-3.0469	-4.6082	5.5311	-1.0559	-3.816	2.5561	8.3621	1.7009	-9.9658	-0.1504	-5.0116	-9.9658	-9.9658	-0.1665	5.1676	-9.9658
LGG	TCGA-DB-A64V-01	2.7398	1.3623	-3.816	-2.2447	0.2998	4.5167	-2.1779	5.98	4.4257	-2.114	-2.7274	-2.3884	-9.9658	-9.9658	-9.9658	0.5859	-1.4699	1.5366	4.66	-0.7346	3.1195	7.6108	5.6528	-2.8262	1.9601	3.4464	4.2064	3.208	0.099	-2.6349	2.7073	-6.5064	-9.9658	-2.5479	4.8545	1.4441	-0.1187	3.1813	8.5318	2.7183	-5.0116	2.9109	-9.9658	-9.9658	-3.1714	-3.816	-0.5543	-9.9658
LGG	TCGA-DU-5854-01	3.29721	1.7702	-3.3076	-3.0469	0.8082	5.6893	-4.035	6.4421	5.1056	-2.3147	-1.8836	-3.0469	-9.9658	-9.9658	-4.2934	-1.8836	-2.0529	-1.2828	5.6259	-1.4699	5.43	7.1149	6.1252	-3.0469	1.105	4.5311	4.067	3.2405	0.1388	-2.6349	3.3856	-1.5951	-3.816	-3.3076	5.3965	0.8805	-0.6873	4.4996	8.8359	3.1475	-3.458	4.4263	-9.9658	-9.9658	-5.5735	-1.3921	-0.013	-9.9658
LGG	TCGA-DH-A7UR-01	4.36319	3.3605	-3.6259	-2.9324	-1.1488	5.4253	-3.6259	4.8095	0.8961	-3.1714	-4.2934	-4.6082	-9.9658	-4.2934	-9.9658	0.7146	-6.5064	-2.8262	3.906	-2.9324	6.7593	6.8268	5.3705	0.2522	-0.5332	3.7539	3.5959	0.4016	-1.2828	-3.458	2.8542	-5.5735	-2.6349	-5.5735	5.1926	-0.0725	0.7407	3.3745	8.8373	1.9675	-9.9658	0.3231	-4.035	-5.5735	-9.9658	-4.2934	-0.4325	-9.9658
LGG	TCGA-S9-A6WL-01	3.39505	2.3366	-4.035	-2.7274	0.0158	4.8314	-2.3884	6.3443	2.3898	-4.035	-2.9324	-3.458	-9.9658	-9.9658	-9.9658	-1.0862	-3.816	-3.1714	4.1994	-1.0862	5.193	6.6885	5.044	-2.6349	-2.5479	3.3745	3.7699	-0.4325	-0.2671	-1.5105	1.4065	-9.9658	-4.6082	-6.5064	5.9734	-1.7322	-2.114	3.8591	8.4425	2.694	-6.5064	1.0915	-9.9658	-9.9658	-9.9658	-4.2934	-1.8314	-9.9658
LGG	TCGA-HT-7880-01	2.54347	1.8879	-3.1714	-5.5735	-0.0574	3.8925	-1.8314	6.0551	2.5437	-9.9658	-1.8314	-3.458	-9.9658	-9.9658	-9.9658	-1.4305	-5.0116	-3.3076	4.2274	-1.5105	4.706	6.8796	5.9554	-2.9324	-1.6394	2.6715	2.8916	1.3956	-0.9686	-5.0116	1.7786	-5.0116	-3.0469	-6.5064	5.7546	-3.816	-3.3076	2.8974	8.092	0.7832	-9.9658	2.9729	-3.6259	-9.9658	-5.0116	-2.8262	0.1519	-9.9658
LGG	TCGA-E1-5318-01	3.18105	2.6395	-9.9658	-9.9658	-1.3548	4.9165	-5.0116	5.5617	2.6602	-3.6259	-4.2934	-4.6082	-9.9658	-5.0116	-9.9658	-0.7834	-6.5064	-4.2934	3.8511	-2.6349	6.4254	6.7899	5.76	-2.2447	-2.8262	3.3619	2.8341	-1.1172	-1.3183	-2.3884	2.5238	-5.5735	-9.9658	-4.035	5.0229	-0.9686	-0.3022	4.1915	8.7313	1.5514	-9.9658	0.1519	-9.9658	-9.9658	-9.9658	-4.2934	-1.5951	-9.9658
LGG	TCGA-DU-6393-01	4.23722	2.2206	-2.9324	-4.2934	-1.7322	3.9901	-4.035	4.0055	1.2756	-3.458	-3.458	-4.035	-9.9658	-6.5064	-9.9658	-0.1665	-4.2934	-3.6259	3.0393	-3.0469	4.8915	6.973	5.0361	-1.2828	-2.2447	4.5723	4.9764	-0.7588	-1.1811	-9.9658	0.4125	-5.5735	0.4016	-6.5064	4.6871	-2.3884	-1.8836	3.002	8.8316	1.1117	-6.5064	-0.4521	-9.9658	-4.6082	-4.2934	-5.5735	0.0718	-9.9658
LGG	TCGA-DU-5853-01	3.13425	1.6964	-4.035	-1.3183	0.2998	5.1194	-0.6193	8.162	4.3758	1.1382	-2.5479	-2.4659	-9.9658	-9.9658	-9.9658	-0.3383	-1.4305	0.4761	4.796	-1.3183	2.8701	7.0525	6.6076	-1.4699	0.8883	3.832	4.6352	2.7951	0.4125	-2.114	2.0742	-1.4305	-9.9658	-3.3076	5.838	-0.5332	1.5266	4.0082	8.9153	1.9786	-2.0529	0.8082	-9.9658	-9.9658	-9.9658	0.7146	5.392	-9.9658
LGG	TCGA-TM-A84J-01	4.52423	1.766	-9.9658	-4.035	-1.3921	7.3875	-9.9658	2.4465	2.6533	-9.9658	-3.458	-2.2447	-9.9658	-5.0116	-5.5735	0.0014	-3.0469	-2.5479	4.8535	-9.9658	8.7746	6.7481	3.9552	-1.2142	-2.114	4.9289	1.9226	-0.0725	-1.685	-4.035	2.6464	-9.9658	-9.9658	-2.5479	4.0153	-2.9324	-2.9324	4.1111	9.3844	2.3536	-6.5064	0.4657	-9.9658	-9.9658	-9.9658	-0.4719	2.5036	-9.9658
LGG	TCGA-FG-5962-01	3.64387	1.4808	-1.4305	-4.6082	0.3231	4.3328	-3.816	5.5395	2.5924	-5.0116	-2.114	-3.6259	-9.9658	-4.2934	-5.5735	-0.1031	-4.035	-3.458	3.7678	0.9642	4.1027	7.1203	6.0815	-1.7322	-1.0862	3.6916	4.4758	1.2394	-0.4325	-4.2934	1.5563	-5.5735	-9.9658	-4.6082	6.3094	0.5069	-1.4699	3.0463	8.2211	1.8918	-9.9658	0.688	-2.9324	-5.5735	-5.5735	-2.5479	3.5596	-9.9658
LGG	TCGA-F6-A8O4-01	3.1077	1.3735	-2.3884	-3.1714	-1.0262	4.9496	-2.114	8.6196	1.7786	-4.035	-3.6259	-2.8262	-9.9658	-9.9658	-6.5064	-0.6416	-5.5735	-3.458	4.0189	-2.3884	3.4398	7.568	5.1899	-2.7274	-1.3183	3.5694	3.4958	0.4016	-1.7809	-3.3076	0.679	-6.5064	-9.9658	-3.6259	5.4453	-2.8262	-5.0116	2.8622	8.8786	0.1776	-6.5064	0.4125	-9.9658	-9.9658	-9.9658	-3.0469	2.8562	-9.9658
LGG	TCGA-S9-A7R1-01	2.858	0.8726	-1.3921	-4.2934	-0.5332	4.5411	-3.1714	5.2384	1.0151	-2.5479	-3.6259	-1.7809	-9.9658	-5.0116	-5.5735	-0.5756	-1.9942	-3.0469	3.2944	-2.0529	3.0944	6.6115	4.9946	-1.685	-3.0469	2.9281	2.2901	-0.5973	-1.3183	-4.035	0.6517	-5.5735	-9.9658	-4.2934	5.4357	0.0718	-1.685	2.7314	8.5876	3.9626	-6.5064	-0.2328	-9.9658	-9.9658	-9.9658	-2.9324	3.1813	-9.9658
LGG	TCGA-TM-A84M-01	4.05051	1.1706	-9.9658	-6.5064	-1.0559	5.5214	-3.816	5.9948	0.3115	-9.9658	-0.9686	-2.7274	-3.816	-9.9658	-9.9658	0.9268	-1.9379	-2.6349	5.0449	-2.3884	4.9737	6.5201	3.1162	-0.4719	-4.6082	4.8973	4.1069	-2.4659	0.0718	-4.035	-0.4521	-9.9658	-2.9324	-1.3548	6.432	-4.035	-4.2934	2.93	9.1543	1.46	-9.9658	-0.3201	-9.9658	-9.9658	-5.0116	-4.035	4.2266	-9.9658
LGG	TCGA-HT-8107-01	2.62298	1.4065	-1.8314	-3.0469	0.9343	3.4945	-2.9324	4.3889	2.1476	-3.816	-4.035	-2.8262	-9.9658	-9.9658	-5.5735	-0.3383	-5.0116	-4.035	3.011	-3.6259	4.2906	6.4463	5.347	-4.6082	-2.6349	2.1702	2.3048	-0.4719	-2.1779	-3.458	1.8643	-9.9658	-9.9658	-3.3076	6.3607	0.6517	-3.458	2.7139	7.8153	2.4117	-9.9658	2.9674	-2.3884	-3.816	-5.5735	0.0014	5.1851	-9.9658
LGG	TCGA-P5-A5ET-01	3.30746	2.2482	-4.6082	-5.5735	-1.2481	5.1306	-3.458	7.759	2.3592	-5.5735	-1.3183	-3.3076	-9.9658	-9.9658	-9.9658	-0.9686	-5.0116	-3.0469	4.5675	-2.8262	4.1724	7.3055	5.1478	-2.0529	-1.9942	3.7783	3.7226	0.1903	-0.7346	-5.5735	1.3956	-4.2934	-4.6082	-3.458	6.3873	-1.8314	-4.035	3.2496	8.9387	0.8883	-6.5064	1.6327	-9.9658	-9.9658	-5.5735	-2.6349	0.03	-9.9658
LGG	TCGA-P5-A72W-01	2.29863	1.4652	-4.6082	-1.9942	-1.4699	5.1132	-4.035	6.8755	2.4386	-9.9658	-1.5522	-9.9658	-9.9658	-9.9658	-5.0116	-1.4699	-3.6259	-9.9658	4.9598	-3.816	2.3135	8.1088	4.892	-2.4659	-1.9379	2.9413	4.3562	-0.6193	-1.8836	-4.6082	0.9268	-5.5735	-9.9658	-5.0116	5.877	-2.114	-4.035	2.7444	8.4759	1.4859	-9.9658	1.1577	-9.9658	-9.9658	-9.9658	-2.6349	-0.7588	-9.9658
LGG	TCGA-FG-A70Y-01	3.00178	1.5563	-2.6349	-4.6082	-1.2142	5.1098	-2.7274	7.3035	4.2958	-3.816	-1.1172	-2.8262	-9.9658	-9.9658	-9.9658	-0.6416	-4.035	-5.5735	5.7509	-3.816	3.603	7.6961	7.3651	-5.5735	-2.8262	2.3048	2.5263	-0.7834	-0.9686	-4.6082	1.8683	-9.9658	-9.9658	-2.9324	5.4983	-3.0469	-4.035	3.8054	7.924	1.674	-9.9658	2.4439	-9.9658	-5.0116	-9.9658	-2.3884	0.3907	-9.9658
LGG	TCGA-TM-A84R-01	3.11939	1.949	-1.9379	-5.5735	0.2277	3.8064	-1.5105	5.1867	1.6649	-9.9658	-2.9324	-2.114	-9.9658	-9.9658	-5.5735	-1.6394	-4.035	-3.816	3.074	-3.6259	4.2442	6.7704	5.4266	-3.1714	-2.1779	3.1327	3.1797	-0.1031	-0.7108	-4.6082	1.2696	-9.9658	-4.6082	-9.9658	6.2899	-2.3884	-4.035	2.7508	8.0079	1.3679	-9.9658	2.7508	-9.9658	-9.9658	-9.9658	-3.0469	-0.3566	-9.9658
LGG	TCGA-HW-A5KM-01	2.35896	0.5069	-3.6259	-2.3147	2.1147	5.7882	0.2762	7.8526	6.0065	2.1444	0.7407	-3.1714	-9.9658	-6.5064	-9.9658	3.1908	-1.4305	0.1903	6.4315	-2.6349	3.1426	7.1528	7.8997	-0.6193	0.0014	5.251	6.1863	1.7185	-1.4699	-4.2934	3.6961	-4.035	-5.0116	-0.3383	6.1651	6.1865	0.6517	4.9996	8.7583	3.2343	-3.3076	2.9432	-9.9658	-9.9658	-9.9658	-0.5543	2.971	-9.9658
LGG	TCGA-HT-7477-01	4.32696	2.6984	-3.816	-3.3076	-0.6643	5.1619	-1.3183	6.9123	3.5073	-3.0469	-1.8836	-0.9132	-9.9658	-9.9658	-9.9658	1.6045	-2.5479	-2.5479	4.3931	-3.3076	6.1681	7.6288	5.3338	-1.1811	-1.0559	4.1748	4.5802	1.0711	-1.5951	-4.2934	2.1345	-9.9658	-2.9324	-1.5951	6.5154	2.4279	-0.6643	3.4358	8.9795	2.7249	-4.2934	1.9786	-4.2934	-9.9658	-9.9658	-2.114	2.0395	-9.9658
LGG	TCGA-FG-A87Q-01	3.75704	1.9073	-0.1993	-1.5951	2.4198	5.318	-3.458	5.7602	5.3958	0.0718	-1.7809	-2.0529	-9.9658	-9.9658	-5.5735	-0.5125	-2.114	-1.9942	5.732	-1.5522	5.3248	7.6574	6.8693	-2.7274	1.0711	4.8375	5.5289	1.8363	0.346	-6.5064	2.2206	-3.1714	-3.0469	-3.3076	5.1684	7.1165	3.3952	4.0082	8.1314	4.0028	-3.0469	3.5887	-9.9658	-4.035	-2.8262	-0.7108	2.6348	-9.9658
LGG	TCGA-FG-A70Z-01	3.88267	2.2237	-5.0116	-0.0574	0.1519	5.6364	-0.4131	6.6379	4.4176	-0.5543	-1.1488	-4.6082	-9.9658	-5.0116	-3.6259	-0.6416	-1.7322	-2.114	5.2315	-1.8314	4.8309	7.5317	6.1954	-2.4659	0.9115	3.9156	5.2404	1.7273	-0.3566	-3.0469	2.7292	-2.5479	-1.3921	-2.7274	5.7978	3.8611	2.2268	4.0127	8.1877	3.2752	-3.458	2.4117	-9.9658	-5.5735	-9.9658	-1.1488	2.4544	-9.9658
LGG	TCGA-FG-A4MU-01	3.83184	1.6374	-1.7809	-1.8314	1.5661	6.8956	-1.4699	6.0828	4.5589	1.8564	0.7832	-2.0529	-3.6259	-5.0116	-5.5735	-0.4131	-0.7108	-0.6643	5.5907	-1.3183	10.0841	6.9098	5.8334	-1.5105	0.6425	4.4067	5.4209	1.9264	-1.3183	-3.1714	3.0876	-1.8314	-2.8262	-1.3183	4.9279	5.404	2.9319	4.3862	9.185	5.3292	-4.035	2.9432	-9.9658	-9.9658	-5.0116	-0.6873	2.4144	-9.9658
LGG	TCGA-DB-A4XB-01	3.63108	1.9264	-4.6082	-2.9324	-0.3752	5.8357	-4.2934	8.5034	3.4358	-2.5479	-0.8599	-5.0116	-9.9658	-9.9658	-9.9658	-0.5543	-2.3884	-1.5951	4.5336	-2.4659	4.1053	6.9259	5.8912	-1.7809	-0.0425	4.3506	4.6059	1.125	0.3573	-5.5735	1.196	-4.035	-3.816	-9.9658	5.9819	0.537	-1.685	3.7116	8.9967	1.3623	-3.3076	1.4281	-9.9658	-9.9658	-9.9658	0.6425	5.6065	-9.9658
LGG	TCGA-WY-A85D-01	2.57046	1.1512	-2.3147	-0.5543	-0.7108	4.402	-2.7274	7.0094	4.3744	-5.5735	-1.7322	-3.816	-9.9658	-9.9658	-9.9658	-0.6873	-5.0116	-3.6259	5.608	-2.3884	4.2343	7.7763	6.791	-2.3884	-3.6259	3.3521	3.8136	-1.1172	-1.8836	-9.9658	1.7744	-9.9658	-9.9658	-5.5735	5.7626	-3.0469	-5.5735	3.4318	8.6583	2.1798	-5.5735	0.6239	-9.9658	-9.9658	-9.9658	-0.5973	2.6441	-9.9658
LGG	TCGA-FG-7641-01	3.12601	0.6517	-2.3147	-4.6082	-0.1031	4.4257	-3.1714	6.5129	1.6374	-9.9658	-2.0529	-2.2447	-9.9658	-9.9658	-9.9658	-1.5522	-5.5735	-5.0116	2.8661	-0.8084	4.3449	6.7134	4.7809	-2.0529	-3.458	4.2434	4.3378	-1.8836	-1.7809	-6.5064	0.2522	-9.9658	-4.6082	-9.9658	5.8994	-4.035	-4.2934	3.002	8.5526	0.5568	-9.9658	1.4808	-9.9658	-3.816	-9.9658	-3.3076	-0.5543	-9.9658
LGG	TCGA-DU-5872-01	2.06695	1.6093	-3.458	-4.2934	0.679	4.9458	-2.7274	7.1272	3.0637	-2.7274	0.058	-9.9658	-9.9658	-6.5064	-4.6082	0.3685	-2.1779	-0.5332	4.3299	-2.2447	3.9929	7.4578	5.4725	-0.1665	0.099	4.2995	4.9407	2.1798	-0.2671	0.7233	1.8604	-3.816	-4.2934	-2.0529	6.5317	3.7324	-1.4305	3.4358	8.2425	2.9984	-6.5064	0.4016	-9.9658	-9.9658	-5.5735	-1.8836	3.0619	-9.9658
LGG	TCGA-FG-6689-01	2.43023	0.9419	-6.5064	-5.5735	0.0158	4.6294	-2.5479	6.5949	4.1828	-9.9658	-0.8339	-4.035	-9.9658	-9.9658	-9.9658	-1.7322	-4.6082	-4.6082	4.8012	-2.9324	2.8622	6.8913	6.9122	-2.5479	-1.0262	3.6972	3.6905	0.9568	-1.2142	-5.5735	2.2144	-6.5064	-9.9658	-4.6082	6.1355	-2.2447	-5.5735	3.869	8.4453	2.8462	-5.5735	2.0742	-9.9658	-5.5735	-9.9658	-1.5522	3.3148	-9.9658
LGG	TCGA-DB-5277-01	2.75487	2.1013	-9.9658	-4.6082	-1.0559	5.3664	-4.6082	6.9621	2.5972	-3.816	-2.9324	-2.9324	-4.035	-9.9658	-5.0116	0.2998	-3.816	1.1512	3.6771	-4.2934	3.8198	6.2126	5.2589	0.9343	-0.9971	4.1978	4.251	-0.1993	-0.6643	-1.6394	1.2934	-5.0116	-3.816	-3.1714	6.5278	0.9268	-1.2481	3.0757	8.604	2.8955	-5.5735	2.167	-4.2934	-9.9658	-5.5735	-4.2934	1.766	-9.9658
LGG	TCGA-HT-A615-01	3.29281	1.6045	-4.2934	-3.1714	1.4335	5.0374	-0.1993	7.6127	4.4816	-3.3076	0.2881	-2.114	-9.9658	-9.9658	-9.9658	0.7748	-2.0529	0.044	4.7539	-0.0574	4.3385	6.8753	5.6843	-3.3076	1.5661	4.6118	5.5817	2.5731	-0.4521	-2.5479	2.2901	-2.114	-4.6082	-2.3884	5.741	2.1213	-1.5951	3.9709	8.8336	3.0602	-1.9942	2.6302	-9.9658	-9.9658	-5.0116	-1.5105	0.8961	-9.9658
LGG	TCGA-DU-7301-01	2.78448	1.5998	-9.9658	-0.5332	0.2762	5.3086	-1.9942	7.3721	4.1708	-2.7274	-0.3566	-2.3884	-9.9658	-5.5735	-9.9658	-0.2328	-1.4699	0.4552	4.3744	-2.0529	4.4777	6.7852	5.6311	-0.9686	-0.8863	4.2965	6.1859	0.7999	-1.1811	-1.5105	2.2452	-4.6082	-2.7274	-2.1779	5.3234	-0.6193	-1.8314	3.871	8.4613	4.5448	-5.5735	2.4518	-9.9658	-9.9658	-9.9658	-0.7108	2.578	-9.9658
LGG	TCGA-P5-A5EW-01	2.68928	1.6785	-5.5735	-0.9686	1.3567	5.8895	-3.6259	8.7116	4.1579	-9.9658	-0.4325	-4.2934	-9.9658	-5.5735	-9.9658	-0.2498	-1.5951	-4.6082	5.2434	-2.1779	4.47	7.3345	6.3363	-1.8314	-2.2447	3.3842	3.8808	1.5902	-0.9686	-2.9324	1.8957	-5.5735	-9.9658	-3.3076	6.5222	-2.4659	-4.6082	4.0985	8.7608	3.4264	-4.6082	1.3956	-9.9658	-9.9658	-5.0116	1.9931	5.3356	-9.9658
LGG	TCGA-HT-A5RB-01	2.45941	2.0325	-3.816	-4.6082	-0.3752	4.6905	-2.7274	8.0739	2.183	-3.458	-2.8262	-3.6259	-9.9658	-9.9658	-9.9658	-0.394	-4.035	-3.1714	3.6054	-3.1714	5.4654	6.6418	5.2149	-0.5543	-3.458	3.3017	3.154	-1.1811	-1.8836	-2.5479	1.614	-5.5735	-4.6082	-5.5735	5.5107	-3.0469	-1.5105	3.1588	8.6721	1.0573	-9.9658	0.6608	-9.9658	-9.9658	-9.9658	-1.4305	2.8158	-9.9658
LGG	TCGA-E1-A7YN-01	2.75913	1.2394	-1.1811	-0.1993	1.7185	5.8061	0.6239	4.9141	5.7822	0.1257	2.8402	-0.5973	-1.2828	-9.9658	-4.2934	6.1169	1.8996	1.2271	5.9914	1.7229	5.4932	7.7287	7.6471	-3.458	3.0585	6.1965	6.765	6.0745	2.4306	0.4657	3.6018	-0.4131	-1.3183	2.4544	5.1631	5.2851	0.044	4.2212	8.489	4.2781	-0.2845	3.9746	-9.9658	-4.6082	-3.816	-1.8836	0.4447	-9.9658
LGG	TCGA-QH-A6XC-01	3.46464	1.46	-1.3921	-3.0469	0.3573	5.5154	-5.0116	6.2531	3.3421	-2.5479	-3.816	-2.5479	-9.9658	-4.6082	-5.5735	-1.8314	-3.458	-4.035	5.037	-3.6259	4.7523	7.4062	6.2089	-9.9658	-1.8314	3.5815	4.6588	0.2029	-2.3147	-5.0116	1.3225	-5.5735	-2.2447	-4.6082	5.5438	3.1426	-0.4521	3.002	8.8858	3.325	-5.0116	2.2513	-9.9658	-5.0116	-9.9658	-2.2447	1.614	-9.9658
LGG	TCGA-S9-A6WN-01	3.18747	0.6425	-3.6259	-3.6259	3.9801	5.9423	2.5061	4.0532	4.0994	0.058	-1.2828	-4.035	-9.9658	-9.9658	-4.2934	-1.5105	-1.2481	-0.8084	5.5043	1.0151	5.2899	7.3596	6.7678	-0.1187	0.5568	4.5091	5.5423	1.8524	0.6608	-1.0559	1.8996	-1.7322	1.105	-1.0862	5.4273	1.7702	-0.2328	3.9965	8.6424	6.1633	-3.1714	2.1862	-4.2934	-9.9658	-9.9658	-1.8314	1.4704	-9.9658
LGG	TCGA-DB-A64L-01	2.46464	1.3454	-1.0862	-3.3076	0.044	4.0584	-3.1714	5.2552	2.5536	-2.9324	-1.1811	-2.6349	-9.9658	-9.9658	-9.9658	-0.6193	-1.6394	-1.3921	3.4277	-1.3548	3.9089	6.7063	5.8902	-9.9658	1.2992	4.3548	4.3834	2.6114	0.0854	-2.5479	1.4335	-4.2934	-9.9658	-1.9379	5.5123	0.6332	0.044	2.5288	8.0779	1.683	-5.5735	0.3115	-9.9658	-9.9658	-5.0116	-1.3921	3.9374	-9.9658
LGG	TCGA-TM-A84I-01	4.0695	1.8643	-9.9658	-2.9324	-0.8599	5.5913	-1.7322	5.8814	3.2405	-5.5735	-0.8599	-1.9379	-9.9658	-9.9658	-9.9658	-0.9971	-2.8262	-2.8262	4.481	-3.0469	4.4257	6.5597	5.1268	0.2998	-0.2845	4.7274	4.2103	0.9862	-0.5973	-6.5064	1.4441	-3.816	-9.9658	-3.6259	5.2265	0.5666	-2.3147	3.0978	9.0772	2.609	-5.5735	1.1316	-9.9658	-9.9658	-9.9658	-0.5756	3.2065	-9.9658
LGG	TCGA-QH-A6CZ-01	3.71588	1.5415	-2.7274	-9.9658	-0.8599	4.6018	-3.816	5.5154	2.2268	-9.9658	-2.3884	-3.6259	-9.9658	-9.9658	-5.5735	-0.4921	-2.9324	-4.2934	3.9874	-3.816	4.756	7.3219	4.842	-4.035	-3.1714	3.4804	3.8847	-1.1488	-0.9132	-2.7274	0.7493	-5.5735	-9.9658	-9.9658	5.1815	-5.0116	-4.035	3.1572	8.7805	-0.0574	-6.5064	0.2029	-9.9658	-5.0116	-9.9658	-1.2481	4.2563	-9.9658
LGG	TCGA-WY-A858-01	1.97089	1.3167	-5.5735	-3.3076	-0.6873	4.6882	-2.114	6.5003	4.2404	-5.0116	-2.3147	-3.1714	-9.9658	-9.9658	-9.9658	-0.2328	-3.1714	-3.816	5.442	-2.7274	3.8531	7.3579	6.8292	-2.7274	-0.6193	3.0842	3.3336	0.9789	-1.4699	-1.9942	2.7508	-4.6082	-5.0116	-3.0469	5.0431	-1.9942	-2.5479	3.6804	8.1756	1.5266	-5.0116	2.328	-5.0116	-9.9658	-9.9658	-1.9942	0.5763	-9.9658
LGG	TCGA-VM-A8CB-01	3.42359	2.1766	-1.9379	-5.5735	-1.6394	4.6899	-3.816	1.683	1.7828	-9.9658	-4.2934	-2.8262	-9.9658	-9.9658	-9.9658	-0.3383	-9.9658	-4.2934	2.2144	-4.6082	3.9983	8.0745	4.7464	-4.2934	-1.4305	5.2939	5.0392	0.1519	-0.0877	-6.5064	0.1388	-9.9658	-9.9658	-4.035	4.9901	0.7748	-1.5105	3.2405	8.8534	1.0915	-5.0116	-0.3201	-9.9658	-9.9658	-9.9658	-5.0116	-1.1488	-9.9658
LGG	TCGA-VM-A8CF-01	1.91456	0.8488	-3.816	0.8883	-0.5332	4.2654	-2.2447	5.3374	4.7421	-4.2934	-1.3548	-5.0116	-9.9658	-9.9658	-9.9658	-0.0425	-3.1714	-0.6416	5.726	-3.3076	1.3846	8.9692	5.717	-9.9658	0.3573	1.934	3.1701	2.1798	-1.3183	-6.5064	2.5087	-9.9658	-3.0469	-3.6259	3.506	-0.8599	-4.6082	3.1939	7.8227	2.5634	-9.9658	1.4174	-9.9658	-9.9658	-9.9658	-1.5951	0.0158	-9.9658
LGG	TCGA-HT-7608-01	3.15866	0.6425	-9.9658	-6.5064	-0.5973	3.9012	-2.3884	7.4454	2.5163	-9.9658	-2.0529	-9.9658	-9.9658	-9.9658	-9.9658	-3.816	-3.816	-5.5735	3.5766	0.5955	4.1531	7.6274	7.3555	-4.6082	-3.0469	3.4791	3.9213	-0.6193	-2.2447	-2.2447	2.1378	-9.9658	-4.035	-4.6082	4.3242	-1.4699	-4.035	3.3966	8.343	1.8801	-9.9658	0.058	-9.9658	-9.9658	-9.9658	-0.2671	4.2803	-9.9658
LGG	TCGA-CS-4938-01	3.0179	1.0079	-4.2934	-4.035	-0.0877	5.4699	-6.5064	8.5296	4.001	-9.9658	0.9862	-5.5735	-9.9658	-9.9658	-9.9658	-1.9379	-9.9658	-4.2934	4.8944	-2.1779	3.6312	7.2043	5.878	-2.9324	-2.3147	3.5073	4.322	0.9268	-1.5105	-4.6082	1.3735	-5.5735	-3.3076	-9.9658	5.7658	-4.2934	-4.2934	3.573	8.6984	2.2113	-9.9658	-0.1993	-9.9658	-9.9658	-5.5735	-0.8339	1.7575	-9.9658
LGG	TCGA-QH-A6X5-01	2.69824	0.679	-3.1714	-5.5735	-1.3183	4.3681	-3.3076	6.9093	2.7314	-5.5735	-5.5735	-2.5479	-9.9658	-9.9658	-5.5735	-0.9406	-5.0116	-6.5064	4.2009	0.24	4.1506	7.5454	5.5348	-2.7274	-3.6259	3.0515	4.0136	-0.5973	-1.5105	-9.9658	0.9493	-9.9658	-4.6082	-3.458	5.1914	-2.1779	-2.3147	3.1765	8.8575	0.679	-9.9658	3.2766	-9.9658	-9.9658	-5.0116	-4.035	-0.394	-9.9658
LGG	TCGA-DU-8166-01	2.81764	1.5902	-1.0559	-4.6082	1.3846	5.7439	-2.7274	8.561	4.1931	-3.458	-0.9971	-2.1779	-9.9658	-9.9658	-9.9658	-0.4325	0.1388	-4.035	4.7851	-1.9379	3.6612	6.5336	5.7293	-0.3201	-1.8314	4.585	4.8992	-0.5543	-1.9379	-2.8262	2.2633	-3.458	-2.9324	-0.9971	6.8268	1.7141	-3.816	4.6159	9.1632	5.7679	-6.5064	2.1862	-9.9658	-9.9658	-9.9658	2.6138	6.5491	-9.9658
LGG	TCGA-HT-8018-01	3.10435	2.3251	-2.6349	-1.9942	0.5763	5.2434	-0.6416	6.0635	4.2951	-0.5756	1.6466	-1.4699	-9.9658	-9.9658	-9.9658	0.1519	-0.8863	-1.0262	4.8939	-0.9406	4.6352	6.4175	6.9429	-2.8262	1.0151	4.5085	4.9869	2.96	0.1257	-1.3548	3.0145	-1.8314	-2.1779	-0.9406	6.5015	2.8502	2.5487	4.2862	8.1866	3.8551	-2.5479	1.7097	-9.9658	-9.9658	-5.5735	-0.1504	4.6888	-5.0116
LGG	TCGA-DU-7292-01	3.47892	1.2516	-2.4659	-4.2934	0.2998	5.8687	-3.458	5.8689	2.5948	-5.5735	-4.035	-4.035	-1.2142	-9.9658	-9.9658	-2.2447	-3.458	-3.816	4.1061	-3.1714	4.0037	7.2035	5.6002	-6.5064	-1.1488	3.7971	4.9055	1.2516	-0.7588	-5.5735	1.3735	-9.9658	-3.816	-4.6082	6.3056	1.3956	-0.5543	3.4596	8.2007	3.0568	-9.9658	1.4911	-9.9658	-5.5735	-9.9658	-2.3147	0.1257	-9.9658
LGG	TCGA-S9-A6TU-01	1.89914	2.0147	-3.458	-3.6259	-0.3201	4.9626	-2.9324	6.9077	3.7324	-9.9658	-0.7346	-3.1714	-9.9658	-9.9658	-9.9658	-0.3752	-3.6259	-6.5064	5.1429	-2.9324	4.1136	7.0495	6.8741	-1.7809	-3.458	3.1475	4.2676	-0.1031	-1.8314	-4.6082	1.4174	-4.6082	-9.9658	-5.0116	5.6829	-2.3884	-5.5735	3.3364	8.5944	2.5137	-9.9658	1.8036	-9.9658	-9.9658	-5.5735	-2.3884	4.9796	-9.9658
LGG	TCGA-DB-A75P-01	2.31325	1.7828	-1.7322	-6.5064	1.1184	5.824	-4.6082	5.569	2.6161	-9.9658	-1.6394	-2.8262	-9.9658	-5.5735	-5.5735	-0.8599	-1.6394	-1.7322	4.7448	-3.6259	3.9847	7.7046	6.3234	-3.816	0.7058	3.5706	4.1343	3.4687	-0.6416	-4.6082	2.0254	-1.9379	-5.0116	-5.5735	6.3447	-0.7108	-2.4659	2.8055	8.2849	1.7575	-5.5735	1.3567	-9.9658	-9.9658	-9.9658	-2.4659	0.3907	-9.9658
LGG	TCGA-FG-6691-01	3.58133	1.0363	-1.1172	-3.6259	0.3231	5.6174	-5.0116	8.3191	5.5886	-9.9658	-3.3076	-4.035	-9.9658	-9.9658	-9.9658	0.1388	-2.9324	-6.5064	5.6918	-2.3147	3.5779	7.0182	7.8197	-1.4305	-2.2447	3.7625	5.1169	0.9038	-1.7322	-3.3076	2.0325	-9.9658	-9.9658	-5.5735	4.8734	-0.8599	-4.035	4.9796	9.0569	3.1062	-6.5064	1.8996	-9.9658	-9.9658	-9.9658	-2.0529	2.167	-9.9658
LGG	TCGA-DU-6399-01	3.43829	1.3109	-9.9658	-3.6259	-0.3566	5.1599	-3.3076	8.1963	4.4404	-9.9658	-2.5479	-4.035	-9.9658	-9.9658	-5.5735	0.03	-3.1714	-2.114	5.2891	-2.9324	3.8561	7.2433	6.8235	-1.1811	-1.1172	3.8769	3.868	1.1316	-2.5479	-4.2934	2.5288	-5.0116	-9.9658	-3.3076	5.306	-1.1811	-2.0529	4.2951	8.8904	1.7744	-6.5064	0.7058	-9.9658	-5.5735	-9.9658	-1.685	2.5363	-9.9658
LGG	TCGA-S9-A7IQ-01	2.90113	1.5806	-1.0862	-4.6082	0.1519	4.1219	-3.3076	6.1997	1.4011	-9.9658	-5.5735	-3.6259	-9.9658	-9.9658	-9.9658	-0.9686	-5.0116	-9.9658	3.421	-1.9379	3.9496	6.887	5.6407	-3.458	-2.8262	2.9356	3.0376	-1.6394	-1.7322	-3.458	1.5216	-9.9658	-3.816	-4.6082	6.7208	-4.2934	-4.6082	2.6602	8.1435	-0.0425	-9.9658	0.9568	-9.9658	-9.9658	-5.5735	-2.3147	1.7575	-9.9658
LGG	TCGA-S9-A6WI-01	2.47251	1.8604	-1.6394	-3.816	-0.0877	3.4984	-3.1714	4.7714	2.236	-9.9658	-5.0116	-3.1714	-9.9658	-9.9658	-9.9658	-0.7108	-4.2934	-2.8262	3.208	-4.035	3.7992	6.6868	5.1764	-3.1714	-1.685	2.3479	2.3337	-0.3201	-1.2142	-4.6082	1.5064	-9.9658	-3.6259	-6.5064	6.2568	-1.1488	-2.8262	2.4439	8.042	1.7995	-6.5064	3.4411	-2.7274	-9.9658	-9.9658	-0.1345	4.4516	-9.9658
LGG	TCGA-DB-A64S-01	2.54846	1.3397	-1.9942	-1.3921	-0.6873	5.2285	-0.8084	7.9781	4.773	-4.6082	1.2934	-9.9658	-9.9658	-9.9658	-9.9658	0.0158	-2.3147	-3.458	5.166	-2.3147	4.7296	7.3981	6.6054	-2.7274	-0.7346	3.8876	4.7274	1.1833	-0.8863	-2.9324	2.0979	-9.9658	-2.2447	-2.8262	6.2617	-1.0559	-4.035	3.6405	8.85	3.0876	-5.5735	2.0289	-9.9658	-9.9658	-5.0116	0.2998	5.63	-9.9658
LGG	TCGA-FG-6692-01	3.71366	2.2693	-2.5479	-1.9942	-0.4719	7.0937	-1.7322	5.4397	3.0145	0.7407	-0.5125	-2.114	-0.5756	-9.9658	-4.6082	0.6608	-1.5105	-0.5125	4.585	-2.0529	6.8912	7.4679	4.1417	-3.816	1.7316	4.5072	5.8832	4.2243	-0.0425	-1.9942	1.7912	-2.0529	-4.2934	-3.3076	5.067	5.3615	1.5758	3.402	8.3693	4.1571	-3.6259	2.043	-9.9658	-9.9658	-5.5735	-3.3076	0.6517	-4.2934
LGG	TCGA-HW-7489-01	2.858	1.6649	-1.2828	-4.6082	0.3115	4.5249	-2.6349	6.4295	2.8916	-9.9658	-0.8863	-3.6259	-3.1714	-9.9658	-9.9658	-1.0262	-9.9658	-6.5064	4.1867	-3.0469	3.0978	6.9724	6.607	-2.3884	-2.3884	3.2781	3.7017	-0.9971	-1.6394	-5.5735	1.9638	-4.6082	-4.035	-4.2934	6.1353	-1.7322	-5.5735	2.9674	8.2929	1.2875	-9.9658	1.5612	-9.9658	-9.9658	-9.9658	-1.4305	4.0601	-9.9658
LGG	TCGA-R8-A6YH-01	3.31034	1.46	-9.9658	-2.3884	-1.9379	5.6247	-9.9658	6.7895	2.6325	-5.0116	-1.685	-3.0469	-9.9658	-9.9658	-9.9658	-1.0262	-5.0116	-4.035	4.7318	-4.2934	4.0001	7.0007	6.1031	0.4967	-3.1714	3.2435	3.834	-1.0559	-1.4699	-5.5735	0.7748	-5.5735	-3.816	-6.5064	4.891	-5.0116	-4.035	3.0654	8.9855	1.9377	-9.9658	0.6608	-9.9658	-9.9658	-9.9658	-1.685	5.174	-9.9658
LGG	TCGA-HT-A618-01	2.44623	1.766	-3.816	-4.6082	0.8082	5.0189	-2.114	7.902	4.837	-3.3076	0.517	-2.7274	-9.9658	-9.9658	-4.6082	-0.3022	-3.3076	-1.8314	5.6442	-2.0529	3.8218	7.5523	7.0143	-2.4659	2.0218	4.7608	5.7816	1.8604	-0.7346	-3.6259	2.9338	-3.3076	-3.0469	-2.8262	5.1359	2.4701	-0.5756	4.0593	8.5463	3.449	-3.458	3.4451	-9.9658	-9.9658	-9.9658	0.5763	4.5161	-9.9658
LGG	TCGA-QH-A65S-01	2.17313	1.105	-3.0469	-3.3076	-0.3383	4.3744	-2.3147	6.3707	4.0918	-3.458	-0.7834	-3.0469	-9.9658	-9.9658	-9.9658	-0.9406	-9.9658	-2.8262	4.591	-1.9379	2.6805	7.8162	6.4497	-1.4305	-3.458	3.0927	4.208	0.5763	-2.0529	-5.0116	1.4335	-9.9658	-3.458	-9.9658	5.6445	-3.0469	-3.6259	3.3379	8.7934	1.7229	-9.9658	1.5998	-9.9658	-9.9658	-5.0116	-3.0469	-1.3548	-9.9658
LGG	TCGA-DU-7019-01	2.45678	1.4652	-2.2447	-3.3076	0.2277	5.4572	-2.9324	8.8109	3.5971	-3.3076	-0.9971	-9.9658	-9.9658	-5.5735	-4.6082	-2.1779	-2.3147	-1.9379	4.5355	-2.2447	4.6236	7.0084	5.8004	-2.6349	0.3796	4.3765	4.3492	1.7446	-1.4305	-2.3884	2.5852	-3.6259	-3.6259	-2.8262	6.7974	1.4911	0.7579	4.0436	8.6822	4.1119	-5.5735	2.0673	-9.9658	-9.9658	-5.5735	-0.7108	3.0825	-9.9658
LGG	TCGA-DU-A7TJ-01	4.39641	1.9822	-9.9658	-2.3147	0.7058	6.8097	-2.5479	8.2476	4.1498	-2.1779	0.2154	-1.5522	-1.2828	-9.9658	-9.9658	-1.2828	-2.9324	-1.5105	5.427	-2.8262	5.9941	7.2449	5.2491	-3.458	0.1124	5.1177	6.325	1.3791	-0.5125	-3.0469	2.2175	-2.2447	-4.6082	-1.8836	6.09	1.9149	-0.2328	4.0909	9.3647	4.2373	-4.035	1.8201	-9.9658	-9.9658	-4.2934	-1.0559	1.5806	-9.9658
LGG	TCGA-TM-A84H-01	2.68262	1.5216	-0.8339	-3.816	-0.0877	5.2048	-3.816	6.3496	3.1475	-9.9658	-0.4921	-1.7322	-3.0469	-9.9658	-9.9658	0.7233	-2.9324	-5.5735	4.9556	-2.3147	4.4283	6.9148	6.3282	0.605	-1.7809	4.6702	3.1781	-1.1811	-0.2159	-6.5064	1.5216	-9.9658	-9.9658	-5.0116	4.9184	-4.2934	-9.9658	3.1011	8.7573	2.7357	-6.5064	0.044	-9.9658	-9.9658	-9.9658	-2.6349	0.2029	-9.9658
LGG	TCGA-S9-A7R8-01	3.16026	1.6045	-9.9658	-2.5479	-0.5973	5.1704	-1.5105	5.7189	4.067	-5.5735	0.547	-1.9942	-9.9658	-9.9658	-9.9658	0.1257	-3.458	-4.6082	5.1748	-2.1779	4.2001	7.0332	6.195	-0.2845	-3.458	5.0286	5.0888	-1.8314	-1.0862	-3.816	1.5216	-9.9658	-4.2934	-3.3076	4.8263	-2.9324	-6.5064	4.1515	8.9403	1.5165	-4.6082	2.0147	-9.9658	-9.9658	-9.9658	-5.5735	-0.2845	-9.9658
LGG	TCGA-S9-A7R4-01	2.41951	2.3732	-2.8262	-3.0469	-0.1345	4.9421	-2.114	7.2214	3.9137	-3.6259	-0.9406	-3.6259	-9.9658	-9.9658	-9.9658	-0.9132	-1.0262	-4.6082	5.1989	-3.6259	4.5886	7.0365	6.4793	-1.8836	-3.1714	3.3731	3.8481	-1.1488	-1.4699	-2.3884	2.3479	-9.9658	-5.0116	-2.0529	5.8729	-1.685	-2.7274	4.4654	8.7045	2.6395	-9.9658	0.8488	-9.9658	-5.0116	-5.5735	-0.2328	4.7491	-9.9658
LGG	TCGA-S9-A7J3-01	3.58133	1.7273	-2.8262	-4.6082	-0.3383	4.9978	-4.2934	6.522	3.5535	-9.9658	-1.6394	-2.9324	-9.9658	-5.5735	-9.9658	-0.9406	-1.0862	-1.685	4.5886	0.1124	4.8314	7.2031	6.3142	-2.9324	-1.1172	4.443	4.2503	0.0158	-0.5332	-5.0116	1.6187	-9.9658	-5.0116	-6.5064	5.7277	1.46	-1.1488	3.4304	8.4617	3.6393	-9.9658	3.1669	-9.9658	-5.5735	-9.9658	-2.5479	1.2696	-9.9658
LGG	TCGA-TM-A84L-01	2.84998	2.2723	-3.816	-0.1031	0.5955	5.0497	-1.5105	6.8234	4.3903	-4.2934	-0.7588	-0.7346	-9.9658	-9.9658	-9.9658	0.5271	-3.3076	-3.458	5.6893	-1.1172	4.1676	7.6038	6.6765	-1.8836	-0.9406	4.1285	3.6589	0.9935	-1.685	-3.816	2.4465	-5.5735	-9.9658	-4.6082	5.4832	-2.114	-2.5479	3.6827	8.2414	3.1245	-6.5064	1.5216	-9.9658	-9.9658	-5.0116	0.8726	4.5217	-9.9658
LGG	TCGA-E1-A7YH-01	2.55584	2.2573	-4.6082	-1.7322	-0.7834	4.551	-2.4659	6.0736	3.8759	-9.9658	-3.1714	-1.2828	-9.9658	-9.9658	-9.9658	0.1388	-4.035	-6.5064	5.5961	-3.458	3.7688	6.7155	6.9409	-3.0469	-9.9658	3.3163	4.0977	-2.0529	-1.685	-5.5735	1.1577	-9.9658	-5.0116	-9.9658	5.5769	-5.5735	-6.5064	3.0995	8.5681	1.2085	-9.9658	2.4701	-9.9658	-5.5735	-9.9658	-2.4659	0.4967	-9.9658
LGG	TCGA-P5-A5EV-01	3.43166	1.9302	-9.9658	-2.9324	-0.3383	5.2056	-3.3076	7.2186	3.3787	-5.0116	-1.685	-4.2934	-9.9658	-2.8262	-5.5735	-1.2481	-5.0116	-1.3548	4.728	-1.685	4.3328	8.2208	6.2169	-1.4699	0.044	3.9365	4.1628	1.9895	-1.0862	-5.0116	1.7744	-9.9658	-4.6082	-9.9658	5.725	0.4552	2.3077	3.5657	8.6833	1.4388	-6.5064	0.3573	-9.9658	-9.9658	-5.5735	-1.9942	0.5271	-9.9658
LGG	TCGA-DU-A7TD-01	4.2979	2.3732	-2.5479	-2.6349	1.9895	6.8758	-1.6394	5.8568	5.2821	2.9747	1.3283	-2.3884	-1.7322	-9.9658	-5.5735	1.0503	0.1124	-0.4131	5.6448	-2.114	6.778	7.5544	5.5546	-3.6259	1.1512	6.0898	6.0726	2.4623	0.5666	-1.4699	2.9013	-2.3147	-2.8262	-0.5973	4.6933	6.734	1.6234	4.9127	9.419	4.1796	-3.1714	2.6873	-9.9658	-9.9658	-3.816	1.8484	5.393	-9.9658
LGG	TCGA-HW-A5KL-01	2.15053	1.7185	-3.6259	-4.6082	-0.9971	4.7453	-2.3884	7.1949	3.4543	-9.9658	-1.2481	-2.8262	-9.9658	-9.9658	-9.9658	-1.0262	-3.0469	-4.2934	4.8233	-2.9324	4.1136	6.6263	5.9179	-1.2142	-3.458	2.826	3.4958	-0.3752	-1.4699	-5.5735	1.3846	-4.2934	-5.0116	-9.9658	5.1696	-2.9324	-2.9324	3.3787	8.4818	1.1117	-6.5064	0.5271	-9.9658	-9.9658	-9.9658	-3.1714	-0.9971	-9.9658
LGG	TCGA-RY-A83X-01	3.51101	1.7141	-4.6082	-6.5064	-1.5105	4.1539	-4.2934	6.0943	2.5036	-3.816	-2.1779	-2.3884	-9.9658	-9.9658	-9.9658	-0.6873	-3.0469	-3.816	4.3992	-1.9379	5.3502	7.0856	5.8963	-2.6349	-9.9658	4.2929	3.2841	-1.1488	-0.5332	-5.5735	0.7407	-6.5064	-9.9658	-9.9658	5.7007	-3.816	-4.035	2.9319	8.7325	0.537	-9.9658	0.8961	-9.9658	-9.9658	-9.9658	-9.9658	-0.4921	-9.9658
LGG	TCGA-HT-7687-01	3.61472	1.5661	-1.8836	-2.1779	0.03	4.867	-2.3884	5.0457	2.9413	-1.5951	-1.1811	-2.5479	-9.9658	-9.9658	-9.9658	-0.1187	-1.9379	-0.3566	3.2526	-0.9971	5.0251	6.3114	5.7853	-0.7108	0.9493	4.9865	5.4169	2.3677	0.1776	-3.0469	1.7009	-2.9324	-3.1714	-2.8262	5.4912	-0.3022	-0.0425	3.5827	8.9952	1.9822	-3.816	0.7579	-9.9658	-9.9658	-5.0116	-2.8262	2.3704	-9.9658
LGG	TCGA-WY-A85A-01	2.8319	1.9786	-2.5479	-3.816	-0.6416	5.1827	-5.0116	7.893	3.091	-9.9658	-0.7346	-5.0116	-9.9658	-9.9658	-5.5735	0.346	-5.5735	-3.3076	4.9603	-2.7274	4.8202	7.4335	5.6537	-1.6394	-1.9942	3.4264	3.5766	0.1388	-0.9686	-4.035	1.6785	-5.5735	-9.9658	-4.2934	6.2608	0.8568	-3.6259	3.4143	8.7338	1.1897	-6.5064	0.3796	-9.9658	-9.9658	-5.0116	0.0158	4.4919	-9.9658
LGG	TCGA-DB-5281-01	3.00721	1.5902	-1.9942	-2.6349	0.1648	5.2396	-3.6259	7.903	3.2034	-2.3884	-1.1488	-3.0469	-9.9658	-9.9658	-4.6082	-1.0862	-2.2447	-2.9324	5.0099	-1.8836	4.6944	6.9149	5.8914	-0.3752	-0.8339	2.828	3.9108	1.3735	-1.5951	-2.2447	1.6604	-4.2934	-3.458	-5.0116	6.488	-1.5522	-0.1665	3.7518	8.7565	2.2663	-5.5735	1.2875	-5.0116	-9.9658	-9.9658	-2.2447	2.4623	-9.9658
LGG	TCGA-E1-A7YK-01	2.44093	1.2992	-4.2934	-4.2934	-0.4325	4.9869	-1.685	5.193	4.856	-1.5522	0.5666	-2.9324	-2.5479	-9.9658	-9.9658	0.6699	-1.2481	-1.5522	5.5675	-2.114	4.2862	7.7305	6.9819	-3.6259	1.4911	4.7903	4.4621	3.3464	0.6699	-2.9324	2.1114	-5.0116	-2.3884	-1.5522	4.2134	1.1316	-1.5105	3.154	8.3359	4.1986	-3.0469	3.616	-9.9658	-5.5735	-9.9658	-0.6416	1.1382	-9.9658
LGG	TCGA-DU-A5TU-01	2.25704	1.9822	-3.816	-1.5105	-0.6193	5.7845	-2.9324	5.4343	4.4803	-2.5479	0.0718	-1.1172	-9.9658	-5.5735	-9.9658	1.6558	-2.114	-1.8836	5.3274	-2.9324	3.1179	7.4413	6.8311	-0.0574	-1.2828	4.0295	4.2243	0.605	-1.0862	-4.2934	2.8178	-5.0116	-1.3183	-3.1714	5.014	0.3573	-1.4305	3.7094	8.9223	3.5411	-4.6082	1.9527	-9.9658	-9.9658	-9.9658	-0.2845	3.0654	-9.9658
LGG	TCGA-DU-A7TA-01	2.81147	2.362	-2.6349	-2.3147	-1.3921	5.4539	-0.8339	5.4246	3.793	0.099	1.5216	0.0718	-3.0469	-9.9658	-4.035	1.4494	-2.3147	-1.2481	5.6203	-2.1779	5.3495	7.3976	6.1552	-0.3383	0.0014	3.6894	4.1277	1.787	-1.685	-3.1714	2.0844	-9.9658	-3.816	-3.458	5.565	1.9822	-1.0559	3.9289	8.7113	1.9302	-5.5735	1.6964	-9.9658	-9.9658	-5.0116	-1.685	5.7236	-9.9658
LGG	TCGA-CS-5395-01	3.90879	2.5972	-2.3147	-4.2934	-0.4325	6.2369	-4.6082	9.3724	3.7877	-9.9658	0.1388	-2.8262	-9.9658	-9.9658	-5.5735	-2.3884	-3.3076	-3.6259	4.1351	-2.3884	5.3495	6.4557	5.2567	-3.1714	-0.8339	3.4237	4.2987	0.5859	-0.5756	-4.2934	1.5115	-4.2934	-4.6082	-2.8262	5.7937	-2.3147	-2.9324	4.1203	9.4748	2.128	-6.5064	0.6425	-9.9658	-9.9658	-5.0116	-0.7108	1.0151	-9.9658
LGG	TCGA-TQ-A7RR-01	2.49311	1.692	-2.114	-1.7809	-0.0277	4.9519	-3.6259	7.8728	4.0144	-9.9658	-2.5479	-2.1779	-9.9658	-9.9658	-9.9658	-1.3183	-4.035	-4.6082	5.4098	-2.9324	3.6916	6.9297	6.5398	-0.8599	-3.0469	4.8125	5.2122	-0.9971	-0.3201	-4.2934	2.0707	-4.2934	-9.9658	-5.5735	5.9112	-1.685	-4.6082	3.8847	8.6778	3.0376	-9.9658	3.4384	-9.9658	-5.0116	-9.9658	-0.7108	3.1556	-9.9658
LGG	TCGA-HT-A5R5-01	2.8156	1.5316	-4.2934	-1.8314	1.9073	5.6147	-3.1714	7.144	5.0471	-0.8599	-0.8599	-4.035	-9.9658	-5.5735	-9.9658	0.5763	1.2455	-4.2934	6.2126	-1.5951	5.3248	7.7731	7.1386	-3.1714	-2.3147	4.2235	5.1186	1.1512	-1.9379	-3.816	2.4252	-9.9658	-0.7834	-0.8599	6.5532	2.3308	-1.6394	4.0251	8.501	5.323	-6.5064	2.5536	-9.9658	-9.9658	-9.9658	1.4228	5.5865	-9.9658
LGG	TCGA-QH-A65V-01	2.53354	0.5955	-4.035	-9.9658	-1.5105	4.4162	-5.0116	6.4123	3.3192	-3.6259	-3.1714	-5.5735	-9.9658	-9.9658	-5.5735	-2.9324	-9.9658	-3.3076	4.4476	-0.6193	3.6148	7.3216	5.6885	-3.1714	-2.6349	2.1638	2.8641	-1.1172	-2.5479	-6.5064	0.8408	-9.9658	-9.9658	-5.0116	4.8734	-0.1345	-3.3076	3.1079	8.6463	1.7954	-6.5064	3.0163	-9.9658	-9.9658	-9.9658	-2.3884	0.9343	-9.9658
LGG	TCGA-S9-A6WP-01	3.70711	1.816	-9.9658	-4.2934	-0.1828	5.1748	-4.6082	5.3523	3.7825	-2.6349	-3.458	-3.3076	-9.9658	-5.5735	-3.0469	0.2762	-2.0529	0.4016	4.3986	-1.6394	4.5442	7.3101	5.9674	-1.7322	0.2522	4.001	2.9581	1.5612	-0.2671	-1.4305	2.1378	-5.0116	-3.458	-3.0469	5.741	-0.6416	-1.1488	3.6827	8.7016	2.4571	-6.5064	2.233	-9.9658	-9.9658	-4.6082	-5.0116	-0.7108	-9.9658
LGG	TCGA-S9-A6U5-01	2.93166	1.3791	-4.6082	-4.035	-0.1665	4.8827	-2.6349	7.2608	3.1829	-1.0862	-2.0529	-2.6349	-9.9658	-5.5735	-4.6082	0.1776	-1.7809	2.4198	4.5136	0.537	4.0019	7.6121	6	-2.8262	2.1444	3.9421	4.9021	3.4945	0.6332	-2.114	2.081	-2.1779	-2.7274	-3.458	6.2836	2.2663	-0.7588	3.1442	8.6616	3.2662	-3.458	1.1512	-3.6259	-9.9658	-4.2934	-2.4659	0.6145	-4.035
LGG	TCGA-E1-A7YO-01	3.49058	1.9034	-2.3147	-2.7274	-0.2498	4.5856	-0.9971	6.0788	1.8119	-9.9658	-1.7809	-2.4659	-9.9658	-9.9658	-9.9658	-0.1828	-9.9658	-4.2934	3.8085	-3.3076	4.5687	6.6978	5.5522	-1.5951	-2.3147	4.7619	4.8365	-0.0877	-0.8863	-3.816	1.3109	-5.5735	-4.6082	-9.9658	5.6468	-4.035	-3.816	3.5851	8.3421	1.6649	-4.2934	-0.1665	-3.3076	-9.9658	-5.0116	-1.5105	1.5758	-9.9658
LGG	TCGA-QH-A6X8-01	3.76131	1.9452	-4.2934	-4.6082	-0.6193	4.9213	-3.816	3.6894	3.6623	-9.9658	-0.9971	-4.035	-9.9658	-5.0116	-9.9658	0.099	-3.0469	-2.8262	4.6588	-3.1714	4.701	7.4634	5.3071	-2.3147	-1.0862	4.1571	4.3263	-0.394	-1.8836	-4.6082	1.3623	-5.5735	-3.0469	-2.8262	5.4832	-2.2447	-5.5735	3.186	8.548	2.5263	-9.9658	2.3843	-9.9658	-5.0116	-9.9658	-1.2142	0.7664	-9.9658
LGG	TCGA-HT-7610-01	3.14241	1.1641	-1.0862	-2.6349	-0.1187	4.8233	-2.4659	7.3104	2.8562	-9.9658	-2.4659	-3.3076	-9.9658	-9.9658	-5.0116	-2.114	-4.6082	-3.6259	3.335	-3.1714	3.7061	6.3496	5.7361	-3.0469	-2.1779	3.7783	3.7888	-0.6416	-1.8836	-3.0469	0.6145	-6.5064	-2.9324	-3.816	6.327	-3.0469	-5.5735	3.6849	8.5264	0.9191	-5.5735	1.2636	-9.9658	-9.9658	-5.5735	1.2271	5.4922	-9.9658
LGG	TCGA-HT-7875-01	3.35475	1.3679	-2.9324	-4.6082	-1.0262	5.0282	-3.816	6.8929	1.7702	-9.9658	-5.0116	-2.8262	-9.9658	-9.9658	-5.5735	-1.9379	-9.9658	-4.2934	3.8798	1.0079	4.6531	6.7136	5.1764	-2.3884	-4.035	4.0189	4.1178	-2.1779	-1.1811	-6.5064	0.6239	-9.9658	-5.0116	-9.9658	7.1307	-0.0277	-2.114	3.6532	9.0696	0.2154	-9.9658	-0.1187	-9.9658	-9.9658	-9.9658	-4.2934	-0.1665	-9.9658
LGG	TCGA-R8-A6MK-01	2.88753	0.4447	-2.6349	-2.9324	-0.1345	4.5589	-9.9658	7.282	3.0376	-9.9658	-3.1714	-5.0116	-9.9658	-9.9658	-9.9658	-2.9324	-5.5735	-3.458	4.2412	-0.4719	4.9951	7.5969	4.8172	-3.458	-9.9658	4.3024	4.722	-2.1779	-1.3183	-5.0116	0.6699	-9.9658	-3.3076	-4.6082	5.4283	-1.9379	-4.035	3.6054	9.0631	0.6239	-6.5064	1.5758	-9.9658	-5.5735	-9.9658	-4.2934	-1.0862	-9.9658
LGG	TCGA-P5-A5F0-01	3.12762	1.8444	-9.9658	-4.6082	-0.8084	4.8207	-2.3147	5.8053	1.3283	-9.9658	-3.458	-2.4659	-9.9658	-5.5735	-9.9658	-1.2828	-4.6082	-5.0116	3.7804	-2.7274	5.1668	7.0992	4.6977	-2.9324	-2.114	4.225	3.1245	0.5069	-0.5332	-4.6082	0.4967	-9.9658	-4.2934	-4.035	5.8719	-1.4699	-3.1714	2.9167	8.5593	0.9115	-9.9658	1.6327	-9.9658	-5.0116	-3.458	-3.1714	-1.2481	-9.9658
LGG	TCGA-R8-A73M-01	3.05655	2.0289	-3.0469	-5.0116	-2.1779	5.3744	-5.0116	5.2739	1.4756	-4.035	-4.6082	-1.7809	-9.9658	-9.9658	-9.9658	-0.2498	-4.6082	-3.816	4.2987	-2.8262	3.9654	8.149	4.3285	-1.9942	-9.9658	2.9729	4.6165	-0.8863	-0.6643	-5.5735	0.2154	-9.9658	-3.0469	-9.9658	5.5714	-3.458	-4.035	2.667	8.6979	0.099	-9.9658	0.2154	-9.9658	-9.9658	-9.9658	-3.458	1.9712	-9.9658
LGG	TCGA-S9-A6TS-01	2.28392	2.0569	-2.6349	-3.3076	-0.5332	4.9093	-2.3147	6.4	4.0575	-1.685	-1.0862	-3.3076	-9.9658	-9.9658	-5.5735	-0.3383	-3.0469	-3.6259	5.4223	-3.816	4.4542	7.8611	6.1522	-1.6394	-2.2447	3.7345	2.7183	0.2762	-1.4305	-2.3884	2.296	-9.9658	-3.816	-4.2934	5.7145	-1.9379	-2.4659	3.6804	8.3903	2.233	-9.9658	0.9268	-4.6082	-9.9658	-9.9658	-2.2447	-0.0277	-9.9658
LGG	TCGA-S9-A6TW-01	2.58494	1.7185	-3.6259	-4.2934	-2.1779	4.4509	-2.3147	5.0264	1.0151	-2.5479	-2.1779	-9.9658	-9.9658	-9.9658	-5.0116	-0.7588	-6.5064	-2.7274	3.0808	-2.9324	4.836	7.8536	5.3045	-3.816	-0.4325	2.4035	2.5876	1.2209	-0.0277	-2.3884	1.5115	-3.816	-2.6349	-4.2934	5.8197	-1.1488	-1.8836	3.0252	8.0173	1.8762	-6.5064	0.3346	-9.9658	-9.9658	-4.6082	-4.6082	-0.9686	-9.9658
LGG	TCGA-E1-5303-01	2.93357	1.3397	-4.6082	-5.0116	-0.8339	4.8334	-2.8262	6.5195	5.3744	-2.5479	-0.3566	-9.9658	-9.9658	-9.9658	-9.9658	-1.8836	-2.6349	-3.3076	5.9876	-3.816	3.2752	6.8509	7.7648	-1.7809	-3.1714	2.6302	3.5411	-0.013	-1.4305	-4.2934	2.5948	-5.5735	-4.6082	-3.458	4.481	-2.7274	-3.458	4.551	8.6153	2.4225	-6.5064	1.2023	-9.9658	-9.9658	-9.9658	0.1776	3.8481	-9.9658
LGG	TCGA-HT-7606-01	4.30455	1.4494	-4.035	-3.816	-1.3921	6.8184	-3.816	6.0913	3.3235	-4.2934	-2.8262	-3.816	-9.9658	-9.9658	-5.5735	0.2881	-5.0116	-3.816	3.9175	-4.6082	6.4975	7.4113	5.444	0.5568	-3.1714	5.0054	4.2095	-0.2671	-2.3884	-6.5064	1.7446	-9.9658	-9.9658	-3.1714	4.9933	-1.8314	-2.9324	3.9261	9.7747	0.5859	-9.9658	0.4233	-9.9658	-9.9658	-9.9658	-1.7809	0.8961	-5.0116
LGG	TCGA-DU-6408-01	3.35051	0.688	-2.4659	-2.9324	0.6699	5.3259	-2.4659	8.2547	4.1078	-3.3076	-2.3147	-2.5479	-9.9658	-9.9658	-5.5735	-0.6193	-3.458	-6.5064	4.8851	-2.5479	3.7603	7.2021	6.7233	-0.9132	-3.1714	4.7049	5.6183	-0.0725	-0.8599	-4.6082	1.6695	-5.5735	-5.0116	-3.816	6.8255	-0.7834	-2.3884	3.9232	8.7471	2.1894	-5.5735	1.5115	-4.6082	-9.9658	-9.9658	-0.5332	4.0497	-9.9658
LGG	TCGA-FG-5964-01	3.3045	1.5563	-9.9658	-6.5064	-0.1031	5.1429	-1.4305	5.1408	4.1136	-9.9658	-1.685	-1.7809	-9.9658	-9.9658	-9.9658	3.3647	-1.3921	1.2271	4.863	-2.4659	4.2017	6.6567	5.7934	-3.1714	-0.2671	2.8462	3.8571	2.3308	-0.3566	-3.6259	1.2085	-6.5064	-9.9658	-2.7274	5.5805	-0.8084	-2.5479	3.4543	8.007	3.002	-5.0116	2.876	-9.9658	-9.9658	-9.9658	-1.9942	0.7407	-9.9658
LGG	TCGA-DB-A64Q-01	3.33625	0.8327	-4.2934	-5.0116	-0.8339	4.8929	-4.6082	8.0416	2.9544	-9.9658	-2.114	-2.114	-9.9658	-9.9658	-9.9658	-0.0574	-5.5735	-3.816	4.5336	0.346	4.0454	7.1351	4.9892	-1.6394	-2.8262	3.4984	3.6849	-1.5522	-1.4699	-3.816	0.4125	-9.9658	-9.9658	-3.0469	4.2736	-2.9324	-4.6082	3.4291	8.9374	0.6145	-9.9658	0.6239	-9.9658	-9.9658	-9.9658	-1.0559	1.5612	-9.9658
LGG	TCGA-S9-A7IZ-01	2.99635	1.3679	-1.4305	-2.2447	0.1648	5.0068	-1.3548	8.6746	3.7982	-3.6259	-4.6082	-3.6259	-3.1714	-9.9658	-9.9658	-0.3383	-3.3076	-3.0469	5.0545	-2.6349	3.8177	7.5515	6.4459	-2.5479	-1.4305	3.9654	4.7192	-0.1504	-1.0559	-3.1714	1.1117	-4.2934	-3.816	-2.9324	5.8243	-1.7809	-2.6349	3.7709	8.3129	2.3953	-9.9658	0.517	-3.6259	-9.9658	-9.9658	-5.0116	1.125	-9.9658
LGG	TCGA-S9-A6WH-01	3.23726	2.2452	-2.3147	-3.458	-0.9406	4.497	-9.9658	3.3828	2.2082	-3.458	-3.3076	-2.4659	-9.9658	-9.9658	-9.9658	-0.3566	-1.9379	-5.0116	3.2944	-3.458	4.3484	7.0376	5.3126	0.044	-2.7274	4.5002	3.8167	-1.7322	-0.394	-5.0116	0.9568	-9.9658	-3.3076	-9.9658	4.5429	-2.4659	-9.9658	2.9747	8.5501	1.7954	-9.9658	1.1447	-9.9658	-9.9658	-9.9658	-2.9324	0.4657	-9.9658
LGG	TCGA-HT-7602-01	2.63227	1.4335	-3.458	-4.6082	-0.1993	4.4829	-3.458	7.914	4.0046	-9.9658	-0.4131	-4.6082	-9.9658	-9.9658	-9.9658	-2.0529	-5.5735	-3.816	4.7143	-1.3183	3.4264	7.0713	6.0943	-2.1779	-2.114	2.9071	2.3222	-0.0425	-1.685	-4.6082	2.0979	-5.0116	-9.9658	-4.2934	6.1165	-0.3752	-2.3884	3.417	8.6976	2.6828	-9.9658	2.4649	-9.9658	-9.9658	-5.5735	0.3796	2.791	-9.9658
LGG	TCGA-DU-A6S8-01	3.17154	2.2931	-4.6082	-5.5735	-2.114	4.8187	-2.7274	3.7815	2.0395	-5.5735	-3.6259	-2.3147	-3.0469	-3.816	-3.816	0.2642	-2.3884	-1.8314	2.8178	-3.6259	4.431	7.0455	4.2412	-2.2447	-0.0725	3.5424	3.3379	0.2762	-0.3022	-3.6259	1.3791	-5.5735	-4.6082	-9.9658	5.2865	-2.114	-3.1714	3.0757	8.8506	1.2209	-9.9658	0.7748	-9.9658	-9.9658	-9.9658	-1.9942	0.434	-9.9658
LGG	TCGA-HT-7858-01	2.81764	1.2394	-2.0529	-0.8084	-0.013	5.151	-2.3147	7.5446	4.2465	-2.7274	0.688	-2.5479	-9.9658	-9.9658	-5.0116	0.099	-3.3076	1.1316	4.6047	-2.0529	5.0005	6.8395	5.7093	-1.1811	1.1641	3.8177	4.3313	3.0774	-0.1993	-1.1488	2.7487	-2.3884	-9.9658	-2.0529	5.9341	2.1147	0.7999	4.1002	8.8055	2.982	-2.6349	1.7532	-9.9658	-9.9658	-5.5735	0.3231	5.0144	-9.9658
LGG	TCGA-S9-A6WD-01	3.25095	0.9038	-3.458	-5.5735	0.0718	3.7083	-5.0116	6.0575	2.3732	-3.6259	-5.0116	-1.8836	-9.9658	-9.9658	-5.0116	-1.1172	-3.1714	-3.458	3.5633	-1.2828	3.6827	7.0862	5.1416	-1.5522	-1.8836	3.4291	3.9431	-0.0725	0.058	-3.458	1.2992	-4.2934	2.081	-9.9658	4.9388	-0.3566	-3.1714	3.1604	8.4179	2.2633	-6.5064	1.1117	-9.9658	-9.9658	-9.9658	-4.6082	-1.0862	-9.9658
LGG	TCGA-HT-7860-01	3.79905	1.2455	-0.1187	-3.458	3.0688	5.5699	-1.1172	9.5961	4.1563	0.9038	-0.4325	-4.2934	-9.9658	-5.0116	-4.035	-0.4719	-2.3147	-0.4325	5.2803	-1.1811	6.2375	6.9274	6.2081	-3.458	1.0151	5.2646	6.0805	2.3732	-0.5543	-2.0529	2.5462	-1.5522	-1.2828	-3.3076	5.2177	6.5711	2.2051	5.14	9.0638	3.8827	-2.3884	1.4388	-9.9658	-9.9658	-9.9658	0.517	5.1453	-9.9658
LGG	TCGA-DU-7006-01	3.77502	0.9862	-5.5735	-3.6259	3.7138	7.326	-1.5522	6.7629	5.0041	-2.8262	0.4447	-3.458	-2.2447	-4.2934	-5.5735	-0.6416	-0.7346	-0.0725	5.8802	-1.3183	6.6212	6.7959	6.2089	-0.7834	2.1509	4.9246	5.5946	3.449	0.2029	-1.3183	2.6418	-2.5479	-1.3921	-2.4659	5.7795	1.5115	0.5763	4.4926	8.7281	3.3577	-2.5479	3.0927	-1.685	-5.5735	-4.6082	-0.4921	2.7487	-9.9658
LGG	TCGA-TQ-A7RS-01	2.89332	2.0218	-3.3076	-3.816	-1.3548	4.6804	-4.035	5.6938	1.9786	-9.9658	-3.0469	-1.7322	-9.9658	-9.9658	-9.9658	-0.4521	-3.1714	-4.2934	4.026	-2.7274	4.5778	7.4548	5.7132	-3.6259	-3.816	3.3993	2.8402	-1.3548	-0.2671	-6.5064	1.2756	-9.9658	-9.9658	-9.9658	6.0036	-3.1714	-4.2934	3.3017	8.8406	1.2875	-9.9658	1.3051	-9.9658	-9.9658	-9.9658	-9.9658	-2.4659	-9.9658
LGG	TCGA-DU-7009-01	3.21725	1.196	-3.0469	-5.5735	-0.7588	4.6708	-4.6082	6.437	1.8404	-9.9658	-2.3147	-2.9324	-9.9658	-9.9658	-9.9658	-2.5479	-5.0116	-4.035	3.1637	-2.5479	4.2936	6.6459	4.936	-0.9406	-3.1714	3.8983	1.5563	-0.3201	-1.2481	-3.458	0.4125	-5.5735	-9.9658	-5.0116	5.6879	-0.5973	-4.035	3.0217	9.0505	1.2576	-9.9658	1.1577	-4.6082	-9.9658	-9.9658	-1.3183	3.5399	-9.9658
LGG	TCGA-DU-7010-01	3.76974	1.7786	-3.3076	-4.2934	-0.7834	5.7669	-2.5479	5.9239	3.4477	-3.6259	-1.9379	-2.4659	-9.9658	-5.5735	-9.9658	-0.4131	-2.6349	-3.1714	3.9337	-2.7274	4.6554	6.2608	6.2091	-0.2498	-0.9971	4.7693	4.4829	0.7233	-1.5105	-2.9324	2.0254	-6.5064	-5.0116	-3.6259	5.3824	1.4174	1.5854	3.3717	8.9878	3.1393	-5.5735	2.0004	-9.9658	-5.5735	-9.9658	-0.9406	1.105	-9.9658
LGG	TCGA-QH-A6X3-01	2.88753	0.4016	-4.035	-2.2447	-0.4131	4.9265	-2.4659	8.5899	1.8404	-9.9658	-0.3566	-3.3076	-9.9658	-9.9658	-9.9658	2.0673	-2.7274	0.2154	3.9654	-1.8314	5.0202	6.74	5.0335	-0.5756	-1.0862	3.2796	3.863	-0.1031	-1.8836	-4.6082	0.058	-9.9658	-4.6082	-0.9406	6.0792	-0.8084	-4.2934	3.5399	9.2245	2.2237	-9.9658	0.1903	-9.9658	-9.9658	-9.9658	-2.4659	4.6708	-9.9658
LGG	TCGA-DU-8164-01	3.41951	1.1833	-3.816	-5.5735	-0.5973	5.2865	-2.2447	6.9919	1.7954	-9.9658	-6.5064	-2.2447	-9.9658	-5.5735	-5.5735	-0.394	-9.9658	-4.2934	4.0705	-2.8262	4.6787	6.8816	4.6719	-1.2828	-3.458	4.9878	3.4843	-2.3147	-0.6643	-3.458	-0.013	-9.9658	-5.0116	-5.5735	5.764	-1.8314	-1.7809	3.3897	9.0928	1.1184	-6.5064	0.058	-9.9658	-9.9658	-9.9658	-1.2142	2.8858	-9.9658
LGG	TCGA-DU-7018-01	3.66339	1.4704	-4.2934	-6.5064	-1.685	4.4033	-9.9658	4.8064	0.5271	-6.5064	-3.6259	-4.035	-9.9658	-9.9658	-5.5735	-1.9379	-3.816	-4.6082	2.167	-1.685	4.6713	6.8422	4.4958	-3.1714	-2.7274	3.6474	2.93	-0.9406	-0.4131	-2.0529	1.2455	-9.9658	-5.5735	-6.5064	5.3104	-1.8314	-3.3076	2.9618	8.5551	1.674	-6.5064	-0.8599	-9.9658	-9.9658	-9.9658	-5.5735	1.2696	-9.9658
[truncated: 10,840 more rows]
[truncated: 13 more columns]
