# Supplementary material for: Pan-cancer landscape of CENPO and its underlying mechanism in LUAD
Source: Respir Res. 2023 Apr 15;24:113. doi: 10.1186/s12931-023-02408-3 (PMC10105544; doi:10.1186/s12931-023-02408-3)
Supplement: Supplementary file 8 — Additional file 8: Table S6. The correlation value of CENPO with the expressions of 60 immune checkpoint (ICP) genes in multiple types of cancers. [file 12931_2023_2408_MOESM8_ESM.xlsx]

## Sheet: Sheet1
Table S6. The correlation value of CENPO with the expressions of 60 immune checkpoint (ICP) genes in multiple types of cancers.
TYPE	GENE	UVM	KICH	LIHC	KIRP	KIPAN	KIRC	MESO	GBMLGG	LGG	HNSC	PAAD	COAD	COADREAD	READ	BLCA	BRCA	THYM	DLBC	CHOL	SKCM	STAD	STES	SARC	LUSC	CESC	ESCA	LUAD	UCEC	PCPG	PRAD	GBM	TGCT	UCS	THCA	LAML	ACC	OV	UVM	KICH	LIHC	KIRP	KIPAN	KIRC	MESO	GBMLGG	LGG	HNSC	PAAD
Inhibitory	CD276	0.634073	0.553298	0.604562	0.55015	0.573697	0.547686	0.437826	0.551268	0.469524	0.245768	0.465438	0.247013	0.282164	0.383883	0.41038	0.287313	-0.42953	-0.080959	0.267754	0.444141	0.382138	0.442302	0.386709	0.368084	0.309114	0.494819	0.451434	0.354719	0.220083	0.473709	0.320158	0.42531	0.496385	0.410771	0.132887	0.479514	0.486596	3.53961e-10	1.44902e-06	3.82566e-38	3.47991e-24	1.64978e-78	8.17467e-43	2.22682e-05	6.78627e-54	2.86155e-29	1.45137e-08	5.90529e-11
Inhibitory	VEGFA	0.536967	-0.00321953	0.344124	0.207865	0.138063	0.07705	-0.010708	0.469243	0.37514	0.162024	0.279115	0.286135	0.270559	0.237916	-0.0185405	0.241133	-0.378907	0.404645	0.265919	0.377081	0.503752	0.423709	0.299046	0.195481	0.288304	0.141875	0.239716	0.238882	-0.0379549	0.212404	0.172246	0.0817771	0.0365391	0.577887	0.212826	0.272135	0.395698	3.36752e-07	0.979532	1.07058e-11	0.000383603	3.80771e-05	0.0763495	0.921586	1.49534e-37	1.87013e-18	0.000212897	0.000161372
Inhibitory	C10orf54	0.491011	0.441054	0.228677	0.322679	0.34192	0.188636	-0.433421	-0.280645	-0.245794	0.0589009	0.293252	0.124076	0.0959701	-0.000387803	-0.0390533	-0.111658	-0.371946	0.0295008	-0.127838	0.128444	-0.0284166	-0.0756434	-0.148804	-0.289757	0.0395635	-0.112966	-0.0502624	0.125375	-0.0210211	-0.13296	-0.183991	-0.00703401	0.125181	0.378708	-0.0775236	0.0573914	0.00494134	4.34101e-06	0.000210027	9.13176e-06	2.10908e-08	1.20193e-25	1.23233e-05	2.74831e-05	1.90232e-13	1.9302e-08	0.180738	7.10929e-05
Inhibitory	IDO1	0.512624	-0.082619	0.144551	0.0954603	0.0619622	-0.108579	0.0832325	0.301466	0.211559	0.101098	0.249672	0.226472	0.21655	0.18898	0.166962	0.243895	-0.186021	-8.05566e-05	0.122183	-0.0162976	0.238169	0.110783	-0.094253	-0.129277	-0.117824	-0.133746	0.0992387	0.0206504	-0.0253508	0.0853229	-0.0788366	-0.0380237	-0.240095	-0.0477097	0.0576571	0.122619	-0.0711027	1.36652e-06	0.509572	0.00540368	0.105951	0.0655583	0.0123787	0.443412	2.24468e-15	1.46552e-06	0.0213752	0.000776734
Inhibitory	KIR2DL1	0.128848	-0.0770948	-0.00187036	0.116133	0.0968963	-0.035777	-0.195543	0.11167	0.0810397	0.0791266	0.0692441	0.182967	0.137053	-0.0119175	0.100673	0.0993703	-0.316312	0.0018245	-0.150421	-0.0914351	0.070657	-0.0384061	-0.0684452	-0.0931573	-0.0926622	-0.128241	0.122418	-0.0078038	-0.0184769	0.0947089	-0.00212427	-0.10451	-0.0666739	0.00238262	-0.015506	0.0526924	0.0108917	0.257762	0.538376	0.971437	0.0489601	0.00393102	0.411096	0.0695102	0.00401777	0.0677225	0.0719614	0.358396
Inhibitory	KIR2DL3	0.331491	-0.0789789	0.0965938	0.0690972	0.0712017	-0.0255862	-0.285183	0.0920327	0.0818283	0.105246	0.080238	0.201777	0.163599	0.0449975	0.178179	0.133566	-0.209991	0.156885	0.0822325	-0.0382043	0.142629	-0.0065623	-0.0554021	-0.0386826	-0.0705682	-0.140673	0.167717	0.090907	0.0831225	0.0775419	-0.0738528	-0.124937	-0.117015	0.00420783	-0.084455	-0.138777	-0.0174883	0.00284268	0.528463	0.063804	0.242438	0.0342879	0.556704	0.00742008	0.0178606	0.0650833	0.0165645	0.287019
Inhibitory	IL13	0.148011	0.281352	0.0603858	0.0240829	0.0973655	0.0505107	0.0157177	0.0330095	0.0698801	0.0935977	0.0503871	0.118252	0.113631	0.0960818	-0.0349705	0.0685957	-0.245392	-0.174432	-0.135342	-0.0344991	0.0402473	-0.0109254	-0.0705585	-0.00353382	-0.0724318	-0.0771258	-0.042947	-0.0757835	0.0579215	-0.0436459	0.116059	-0.110996	0.103446	0.0330103	0.131319	0.129186	-0.0338763	0.192997	0.0221093	0.247234	0.684021	0.0037594	0.245707	0.885111	0.396471	0.115345	0.0331899	0.504175
Inhibitory	VTCN1	0.238305	0.236023	0.290965	0.181224	0.173956	0.170992	0.0378866	0.0895498	0.160075	0.15143	-0.0968485	-0.0780054	-0.045547	0.0377301	0.0436397	-0.0840169	-0.146995	0.111137	0.194881	-0.0541835	0.0432971	0.101327	0.00582557	0.0495641	0.0228741	0.0560467	0.0113878	-0.0217414	-0.0376546	-0.105739	0.230463	0.0646666	0.033568	-0.10427	0.214201	0.0345305	-0.0161407	0.0344372	0.056408	1.24128e-08	0.00201708	1.94531e-07	7.60851e-05	0.727542	0.0212038	0.000287856	0.000543938	0.198428
Inhibitory	BTLA	0.32397	0.358906	0.094466	0.279632	0.311825	0.214893	0.146834	0.0186072	-0.0429777	0.121989	0.080017	0.0427714	0.0515392	0.0798335	0.0901381	0.0695106	0.0293802	0.106663	0.0400375	0.114842	-0.085827	-0.14707	-0.0761503	-0.144961	-0.2081	-0.17751	-0.150042	-0.0684594	0.0908576	0.0497361	-0.0554406	-0.108629	-0.178047	0.0247122	0.233954	0.117382	0.025137	0.00358428	0.00308307	0.0699043	1.42562e-06	2.1835e-21	5.91475e-07	0.174737	0.63273	0.333202	0.00543408	0.288353
Inhibitory	SLAMF7	0.282771	0.144961	0.256718	0.205467	0.264468	0.201018	-0.0947719	0.22324	0.126882	-0.0750957	0.106193	0.172414	0.171166	0.170085	0.0242508	0.137877	-0.28859	-0.0640574	0.125141	0.0107611	0.124303	-0.0522989	-0.0812954	-0.196676	-0.136875	-0.307227	0.0131401	0.0206752	0.100109	0.06708	-0.0632691	-0.0583995	-0.172728	-0.0310277	0.144383	0.0184695	0.0646233	0.011569	0.245515	5.77253e-07	0.000449388	1.2972e-15	3.09283e-06	0.382578	6.38301e-09	0.00414194	0.0877417	0.158304
Inhibitory	HAVCR2	0.451661	0.286934	0.353116	-0.0162412	0.26583	0.233413	0.0653333	0.0773933	-0.0122738	0.153507	0.159053	0.141726	0.119854	0.0517691	0.236027	0.12231	-0.370361	0.133982	0.266813	0.0798212	0.165594	0.0377473	0.0778926	-0.169215	-0.147191	-0.0844424	0.0127795	0.0419813	0.0770566	0.0420516	-0.243196	-0.0878856	-0.0207713	-0.0142434	-0.00588292	0.03062	0.06441	2.93995e-05	0.0194979	2.8191e-12	0.783745	9.16448e-16	5.4441e-08	0.547695	0.0465355	0.782365	0.000454668	0.033955
Inhibitory	CTLA4	0.243535	0.279396	0.239657	0.0830295	0.278876	0.229597	0.0732032	0.0697293	0.0250161	0.148219	0.0988275	0.211278	0.200017	0.169462	0.195565	0.192104	-0.343439	-0.0806167	-0.00567606	0.171509	0.243833	0.149525	0.0755403	-0.0759316	-0.131382	-0.0402817	0.0808866	-0.150493	0.0503212	-0.0492203	-0.0582855	-0.06782	-0.142768	-0.126345	0.0395739	-0.085254	0.0518975	0.0305597	0.0230921	3.22311e-06	0.159915	2.96306e-17	9.05124e-08	0.500424	0.0729919	0.573374	0.000714457	0.189368
Inhibitory	TIGIT	0.317388	0.215895	0.286206	0.18752	0.280758	0.265745	0.133885	-0.0310692	0.00552342	0.122424	0.170067	0.179734	0.163768	0.113137	0.196584	0.140476	-0.384113	-0.0996659	0.0808533	-0.0656316	0.086326	-0.0254863	-0.0307252	-0.0276286	-0.13211	-0.146142	0.0886565	-0.0245963	0.0993099	0.0422004	-0.125082	-0.0845874	-0.0791826	-0.0565358	0.0748598	-0.132968	0.0447954	0.00437013	0.0816792	2.18477e-08	0.00138923	1.77861e-17	5.11394e-10	0.216345	0.424828	0.901071	0.0052693	0.0232347
Inhibitory	IL12A	0.0691947	0.270103	0.383746	0.276124	0.272109	0.247156	0.273864	-0.00278006	-0.043915	0.405592	0.0391121	0.138184	0.158064	0.227443	0.181142	0.0950332	-0.325297	0.32135	0.26002	0.11471	-0.0105998	0.00283848	0.0718242	0.157951	0.126498	0.0281122	0.163336	0.0584474	0.0811169	-0.0628248	0.390805	0.0545661	-0.0114142	0.238024	0.0424389	0.163089	-0.0152762	0.544555	0.0282828	2.15506e-14	1.95105e-06	1.79831e-16	8.10659e-09	0.0102654	0.943084	0.322756	6.23254e-22	0.604219
Inhibitory	CD274	0.300667	0.223321	0.20509	0.199299	0.184317	0.230928	0.238034	0.157948	0.0555809	0.0788777	0.311518	0.24639	0.271564	0.351681	0.338157	0.16739	-0.297908	0.322178	0.365837	0.208846	0.275965	0.186129	-0.107182	0.0908453	-0.0506672	-0.111659	0.180412	0.0614672	0.228075	0.0309208	-0.0599376	0.0181893	-0.0329803	-0.137672	0.223617	0.0731969	0.224505	0.00709421	0.0714765	7.23111e-05	0.000669683	3.39516e-08	7.58806e-08	0.0264094	4.46753e-05	0.210625	0.0728636	2.30906e-05
Inhibitory	LAG3	0.441849	0.259324	0.281881	0.17252	0.301868	0.265863	0.18533	0.181269	0.130188	0.137516	0.249443	0.307193	0.299598	0.280152	0.297539	0.198079	-0.378029	0.0376161	0.129198	-0.124968	0.145706	0.0514877	-0.0537422	0.00999475	-0.073603	-0.0765932	0.226238	0.12663	0.125932	-0.253953	0.13444	-0.0423578	-0.177653	-0.0267688	0.00553323	0.157308	0.156981	4.57127e-05	0.0354988	3.61938e-08	0.00331315	4.4149e-20	5.02144e-10	0.0856947	2.67844e-06	0.00325595	0.00170592	0.000785732
Inhibitory	IL10	0.370124	0.168848	0.173133	0.182914	0.296053	0.283421	-0.00491232	0.0940876	-0.0149235	0.0896644	0.18523	0.135442	0.144635	0.16817	0.197128	0.200418	-0.187591	0.466326	0.315558	0.312254	0.15289	0.0571737	0.0725299	-0.126951	0.00381197	-0.103008	0.0700569	0.183225	-0.0271852	0.107279	-0.342757	0.180744	-0.2365	0.110691	-0.0859572	-0.0481783	0.150569	0.000786873	0.175331	0.000838547	0.00182701	2.42404e-19	3.00785e-11	0.963982	0.0154518	0.736961	0.0413596	0.0133117
Inhibitory	TGFB1	0.466923	0.375705	0.34717	0.267285	0.370855	0.361089	0.441513	0.100876	-0.0472343	-0.00990801	0.247868	0.16236	0.135258	0.0462242	0.0304843	-0.191451	-0.0787321	0.102422	0.0676793	0.133399	-0.00540485	0.0496877	0.134992	-0.0624793	0.146613	0.0360867	0.00508091	0.264955	-0.0525897	-0.0968637	-0.0154261	0.0900409	0.144604	0.410644	-0.00318068	0.223258	0.268129	1.43957e-05	0.00187935	6.8451e-12	4.2206e-06	3.30531e-30	9.11594e-18	1.86302e-05	0.00939853	0.287497	0.822008	0.00085028
Inhibitory	ADORA2A	0.558599	0.178151	0.333476	0.246186	0.228398	0.181339	0.263763	0.127924	0.155123	0.27416	0.0751762	0.238857	0.192854	0.0602107	0.189249	-0.0651626	0.757677	0.412442	0.000810819	0.00795818	0.0910654	0.0018209	0.00874924	-0.0383577	0.149177	-0.0297712	0.0161762	0.0890488	0.0289034	0.00923576	0.331986	0.122083	0.237643	0.318391	0.169625	0.469121	0.410088	8.81341e-08	0.152393	4.92351e-11	2.39003e-05	6.32304e-12	2.67202e-05	0.0135675	0.00097114	0.000444068	2.19966e-10	0.318609
Inhibitory	PDCD1	0.421488	0.215453	0.257946	0.300629	0.319666	0.209219	0.0858783	0.205468	0.119468	0.131471	0.0912501	0.27683	0.250944	0.174674	0.174934	0.0917161	0.598413	0.0341484	0.162811	-0.103801	0.12418	0.0114367	-0.0629623	-0.0736683	-0.0886328	-0.109765	0.157513	-0.0171492	-0.00113734	-0.0440558	0.0165691	-0.092543	-0.105011	0.0253645	0.0388227	-0.0488602	0.0608646	0.00010954	0.0823207	5.07591e-07	1.98814e-07	1.88486e-22	1.17927e-06	0.429005	9.629e-08	0.00696797	0.00271747	0.22575
Inhibitory	ARG1	-0.0415007	0.285425	-0.239835	0.0850881	0.114205	0.0229244	-0.136449	0.0290621	-0.0667032	-0.284429	-0.101308	-0.0813196	-0.0511972	0.0510975	-0.053402	-0.0226298	-0.096049	0.0914604	0.040656	-0.0882163	0.00823913	-0.0171817	0.107783	0.0529658	0.0413033	-0.295548	0.0232466	-0.058265	-0.0286821	0.146486	0.0106209	0.144312	-0.053955	0.145982	0.186586	0.159041	0.103884	0.716498	0.0201763	3.16783e-06	0.149775	0.000669245	0.598484	0.207595	0.455369	0.132873	4.266e-11	0.178446
Inhibitory	EDNRB	-0.285656	0.00608685	0.00846199	0.173328	0.0837638	-0.092438	-0.0158418	-0.0913186	-0.0915395	0.179678	0.0285929	0.000130792	0.0583933	0.252563	-0.112059	-0.173204	-0.323955	0.2736	0.0302791	0.102508	-0.00687661	-0.0955364	-0.0176624	-0.146497	-0.0230518	-0.130319	-0.20217	-0.0553145	-0.129415	-0.00128481	0.333506	0.118437	0.114176	0.422384	0.116924	0.40108	0.188963	0.0107133	0.961313	0.871305	0.0031669	0.0127266	0.0333689	0.88421	0.0187714	0.0389718	3.90487e-05	0.704787
Inhibitory	IL4	-0.142958	-0.00979228	0.0838511	0.0231443	0.0439233	0.00123097	0.125625	0.205441	0.132422	0.0346741	0.0434802	0.109673	0.0534124	-0.14732	-0.00812972	0.00189095	0.538003	-0.130863	-0.146047	0.0489339	-0.100147	-0.0746122	-0.0457026	-0.0803552	0.118171	0.050735	-0.144135	-0.102686	-0.153641	-0.0372184	-0.0946291	0.0439539	-0.0159049	0.0738704	0.0178451	0.0598585	0.0541159	0.208806	0.9378	0.107814	0.695712	0.19199	0.977445	0.24629	9.66791e-08	0.00275857	0.43099	0.564424
Inhibitory	VEGFB	-0.0456888	0.0613316	0.49831	0.053771	-0.0502859	0.00601171	-0.198556	0.0136346	-0.0949496	0.14857	0.0860863	0.0137223	-0.0326569	-0.169057	0.185918	-0.160529	-0.0118425	-0.309221	-0.0872317	-0.0861179	-0.167295	-0.0903244	-0.295911	0.146708	0.13022	0.122392	0.0997727	0.177044	0.212049	-0.0908133	0.197986	-0.271985	0.115625	-0.0503498	0.22591	0.429188	0.20347	0.689284	0.624699	1.48297e-24	0.363238	0.135192	0.890182	0.0652388	0.726217	0.0322148	0.000693655	0.253219
Stimulaotry	HMGB1	0.534447	0.57056	0.482548	0.493353	0.47411	0.364742	0.37217	0.363401	0.442767	0.510003	0.596932	0.446986	0.395924	0.318548	0.529186	0.390858	0.587896	0.501107	0.159595	0.434288	0.549754	0.492862	0.365569	0.519671	0.337928	0.502861	0.421562	0.536509	0.318701	0.414102	0.501733	0.437281	0.261159	0.533206	0.635704	0.570167	0.379426	3.91305e-07	5.68537e-07	6.41557e-23	4.50586e-19	9.72399e-51	4.03119e-18	0.000385854	4.25589e-22	7.51949e-26	1.20691e-35	1.44813e-18
Stimulaotry	IL2	0.154178	0.362436	0.043021	0.0868454	0.118438	-0.0252257	-0.191794	0.0989889	0.120876	0.0751146	-0.0299368	-0.00715475	-0.0474336	-0.151475	-0.0336157	-0.0317654	-0.295581	-0.262757	0.0614728	-0.0559362	-0.0444212	-0.10563	-0.072849	-0.0991606	-0.169535	-0.111047	-0.168597	-0.197242	0.0709173	-0.0344662	-0.0901819	0.168367	-0.0911255	-0.0787938	-0.115992	-0.0853248	-0.0698431	0.174894	0.00278443	0.409949	0.141512	0.000417369	0.562279	0.0751374	0.0108228	0.00632571	0.0876616	0.691602
Stimulaotry	SELP	0.200331	0.00828764	-0.0834533	0.147613	0.0890071	-0.0696811	-0.164931	-0.0212842	-0.0761468	0.072301	-0.0592069	0.0238889	0.0148126	-0.00498846	-0.203595	-0.200139	-0.2892	-0.151325	-0.228667	-0.219909	-0.279841	-0.299921	-0.331083	-0.187256	-0.0813229	-0.282831	-0.209601	-0.11142	-0.131973	-0.152806	0.0119666	-0.0985428	0.00384088	0.164842	-0.0954257	-0.184484	-0.00560381	0.0766954	0.947343	0.109501	0.0121439	0.00809972	0.109081	0.126861	0.584615	0.0861219	0.100234	0.432429
Stimulaotry	TNFRSF14	0.355782	0.102236	0.193594	-0.0487686	0.0977832	-0.0168336	-0.0237832	0.220789	0.0783132	0.194782	0.213715	0.280939	0.207399	-0.0785442	-0.27223	-0.288604	-0.166571	-0.206881	0.000682344	0.174934	0.147341	-0.0775583	-0.25695	-0.14326	-0.0133663	-0.222708	-0.208774	-0.150233	0.0296161	0.12957	-0.0941715	-0.281881	-0.155177	0.1154	0.0421206	-0.100393	0.0168855	0.00129163	0.414017	0.000182812	0.409644	0.00361235	0.699014	0.826917	9.41022e-09	0.0775313	7.99581e-06	0.00417808
Stimulaotry	CD27	0.366113	0.404031	0.232297	0.150263	0.275104	0.178434	0.0602343	0.138381	0.193211	0.0949752	0.138481	0.132757	0.131285	0.128509	0.0488981	-0.0087957	0.225977	-0.428092	0.0317441	-0.114613	-0.109882	-0.20074	-0.165431	-0.255228	-0.182012	-0.24667	-0.167332	-0.127258	0.036582	-0.0970056	-0.175477	-0.180569	-0.265497	0.229848	0.0293867	-0.168748	-0.00766835	0.000905917	0.000767345	6.51465e-06	0.0106653	8.14589e-17	3.60611e-05	0.579438	0.000355727	1.13476e-05	0.030675	0.0652641
Stimulaotry	CD40LG	0.292417	0.247514	0.080484	0.143278	0.266333	0.113335	-0.144561	0.150018	0.121075	0.161791	-0.0375437	0.0328566	0.0370743	0.0564067	-0.0670469	0.0120134	0.135362	-0.00521046	-0.0570068	0.0484076	-0.0476753	-0.170922	-0.273527	-0.184574	-0.125933	-0.187335	-0.252083	-0.107527	-0.0393129	0.0134492	-0.154576	-0.105214	-0.0650522	-0.00550775	-0.0231035	-0.0863094	-0.0572531	0.00892119	0.0451033	0.122756	0.0149533	8.05588e-16	0.00901679	0.181581	0.000106834	0.00623924	0.000217489	0.618807
Stimulaotry	CX3CL1	0.519351	-0.193414	0.177502	0.198141	0.111677	-0.0221811	0.089108	-0.192217	-0.13745	0.290688	0.128971	0.124989	0.0701794	-0.125917	-0.0124321	0.0156938	-0.415179	0.0608869	0.116847	0.158145	0.0182908	0.0746321	-0.303486	0.0683677	0.0271094	0.1013	-0.177005	0.003922	-0.0289703	-0.158974	0.194013	-0.0454685	-0.151703	0.266136	0.142574	0.338954	0.163972	9.38049e-07	0.119705	0.000613974	0.000720858	0.000880638	0.610399	0.411784	6.26691e-07	0.00188263	1.51784e-11	0.0862092
Stimulaotry	IFNA1	-0.0738186	-0.13179	0.127233	0.0649018	0.0243181	-0.0351827	0.19296	0.0484531	0.0820881	-0.0621865	0.109857	-0.132307	-0.118179	-0.0880992	-0.0391913	-0.0439776	-0.27287	0.0176334	0.264015	-0.0601718	0.0683121	0.0799948	0.137886	-0.123954	0.0731937	-0.0481485	-0.0036802	0.0770378	-0.0265261	-0.0204032	0.0419535	-0.00230307	-0.0705504	0.10586	0.0154073	0.0936999	0.0479438	0.51793	0.291509	0.0144563	0.272297	0.470225	0.418916	0.07335	0.213116	0.0642324	0.15757	0.144352
Stimulaotry	IFNA2	0.0165634	-0.0295678	0.0907451	0.000937797	-0.0653733	-0.0704715	0.0855794	-0.0638828	-0.0158495	0.0569037	-0.0231937	-0.124376	-0.110562	-0.0697749	0.0114201	-0.0398533	0.0857359	0.0134088	NA	0.224048	0.0434863	0.0012301	0.161504	0.0132314	0.0237777	-0.106998	0.109723	-0.0680278	-0.0908157	-0.0177187	0.109672	0.0636055	-0.013835	-0.0806962	0.0237569	0.219695	0.00524072	0.884804	0.813687	0.0817124	0.987357	0.0520142	0.105112	0.430619	0.100541	0.721298	0.196002	0.758612
Stimulaotry	ICOSLG	0.434635	0.310169	0.0794849	0.237416	0.239808	0.138178	0.0124602	0.0357254	-0.0315585	0.304841	0.132456	0.217183	0.160927	-0.0239817	0.168748	0.213617	-0.381067	-0.0524568	-0.00703264	0.0943663	0.0982977	0.0987543	0.218558	0.215522	0.133999	0.209434	0.0718848	0.288085	-0.0444278	0.108475	0.0892979	0.129191	0.169281	0.278299	0.301635	0.0848857	0.300607	6.27028e-05	0.0112599	0.127487	4.70314e-05	4.98896e-13	0.00142816	0.908806	0.358751	0.477445	1.33377e-12	0.0779836
Stimulaotry	CD70	0.431573	0.199976	0.240595	0.0267527	0.238379	0.0873419	0.261193	0.296038	0.212751	0.174774	0.296297	0.0953045	0.0594068	-0.0590313	0.216346	0.103587	-0.310303	-0.0623993	0.0269383	0.0471403	0.127827	0.105151	0.14751	0.027389	-0.0686282	0.0712743	0.0624684	0.105565	-0.0279477	0.0119883	-0.251065	-0.13961	-0.0180872	-0.0822524	0.103454	0.125172	-0.0810648	7.15498e-05	0.107425	2.94187e-06	0.651186	6.90717e-13	0.0444463	0.0145422	7.3997e-15	1.27489e-06	6.36078e-05	5.9246e-05
Stimulaotry	TNFSF9	0.52958	0.442973	0.255085	0.0420158	0.294138	0.163038	0.166681	-0.145563	-0.101795	-0.108456	0.228667	0.0390269	0.0149592	-0.086388	0.226998	0.121912	-0.392254	0.0403545	0.130657	0.146989	0.128077	0.128162	0.278027	0.111498	-0.134055	0.0553052	-0.0989242	0.0883045	-0.0800877	-0.127002	-0.174577	-0.0970001	0.0143888	-0.0422017	0.0956379	0.127764	0.0273991	5.21132e-07	0.000195575	6.84238e-07	0.477552	4.21057e-19	0.00016337	0.122825	0.000171142	0.0216226	0.0135211	0.00213993
Stimulaotry	IL1A	0.232603	0.0601263	0.343902	0.132379	0.201931	0.256855	-0.138901	0.0157442	-0.0776955	-0.0722671	0.0931855	0.0322931	0.118872	0.361605	0.0509181	0.181939	-0.225949	0.130682	0.298649	0.164795	0.223144	0.28291	0.0968016	-0.137301	0.0523098	0.163561	0.111146	-0.00570291	0.165338	0.0334098	-0.286816	-0.153412	-0.0998867	0.132958	0.435261	0.097757	0.0288658	0.0391262	0.631534	1.10597e-11	0.0246612	1.37937e-09	1.97024e-09	0.199468	0.685957	0.0799064	0.100394	0.216019
Stimulaotry	CXCL10	0.429251	0.0448989	0.0112133	0.217896	0.182495	0.154162	0.184746	0.345177	0.216989	0.040002	0.240708	0.267388	0.243377	0.168044	0.263122	0.28765	-0.422973	0.118473	0.239432	0.10097	0.271232	0.175956	-0.0192406	0.00269661	-0.0844903	0.0270484	0.24232	0.109842	0.0883275	0.206141	-0.0392977	0.106425	0.0161618	-0.0544469	-0.0681602	0.0914841	0.0694557	7.90178e-05	0.720365	0.83002	0.000194065	4.64861e-08	0.000368023	0.0867027	5.85242e-20	7.71447e-07	0.363564	0.00120987
Stimulaotry	CXCL9	0.43345	0.065464	0.129094	0.216204	0.233461	0.206635	0.125028	0.35535	0.302578	0.0445031	0.204705	0.231387	0.20043	0.102214	0.210184	0.179926	-0.371824	0.0912229	0.217672	0.0222623	0.226825	0.0766593	-0.045162	0.00661657	-0.1094	-0.124445	0.199708	0.0268956	0.0191757	0.147511	-0.0755308	0.0491656	-0.0454264	-0.0276855	0.0140437	-0.0176685	0.0321755	6.59991e-05	0.60151	0.013072	0.000218184	2.08264e-12	1.60467e-06	0.248562	3.89728e-21	3.08438e-12	0.312051	0.00612611
Stimulaotry	IL2RA	0.334767	0.358338	0.281432	0.276545	0.382986	0.379565	0.247246	0.213933	0.0988735	0.220505	0.251439	0.207328	0.22279	0.272671	0.226361	0.344455	-0.252529	0.168173	0.0854188	0.165384	0.238882	0.144713	0.0237534	-0.0702666	-0.0671958	0.0300152	0.191761	0.078613	0.182886	0.126807	-0.304387	-0.0477195	-0.104823	0.0367241	0.114886	-0.102641	0.181115	0.00256495	0.00313363	3.81225e-08	1.87941e-06	2.9098e-32	1.3188e-19	0.0209561	2.72219e-08	0.0257029	3.9989e-07	0.000710377
Stimulaotry	CD80	0.464449	0.208431	0.339855	0.236664	0.297506	0.300654	0.155677	0.255733	0.141627	0.129462	0.197249	0.19742	0.179609	0.138895	0.264388	0.279513	-0.278121	0.226613	0.0447944	0.231141	0.311426	0.203657	0.0798489	-0.111725	-0.0738514	0.0159171	0.00361269	0.160037	-0.0286208	0.139975	-0.0199667	-0.00779416	0.0110824	0.0308321	0.1584	0.175885	0.226738	1.61998e-05	0.0930645	1.98762e-11	4.97845e-05	1.58971e-19	1.55561e-12	0.149911	2.40947e-11	0.00135746	0.00315908	0.00831336
Stimulaotry	TNFRSF9	0.488691	0.282509	0.255877	0.218023	0.361185	0.329567	0.116675	0.179383	0.112041	0.226986	0.231635	0.183346	0.201693	0.245342	0.239553	0.219235	-0.238762	0.180471	0.0240981	-0.00938776	0.159799	0.0978374	0.156488	-0.0267251	-0.0219637	0.0566433	0.140648	0.0178064	0.0965495	0.132406	-0.15005	0.0418988	-0.0283699	-0.03118	0.129555	0.387533	0.240929	4.89185e-06	0.021545	6.30175e-07	0.00019236	1.24761e-28	6.8128e-15	0.281834	3.41042e-06	0.0114222	1.77056e-07	0.00186425
Stimulaotry	ICAM1	0.576195	0.386419	0.23818	0.16328	0.362057	0.310419	-0.0115866	0.156555	0.00961969	0.26942	0.199657	0.190392	0.175902	0.129085	0.244689	0.143682	-0.269804	0.0796265	-0.0177277	0.392836	0.339656	0.263763	-0.0310964	-0.186027	0.0205892	0.146272	-0.082996	0.168438	-0.084168	0.158203	-0.102536	-0.0713145	-0.0671227	0.0553441	-0.00619854	0.258374	0.190613	2.75515e-08	0.00135169	3.71866e-06	0.00547661	9.03706e-29	2.6539e-13	0.915175	5.22305e-05	0.828597	4.5849e-10	0.00754118
Stimulaotry	IL1B	0.350594	0.10322	0.301241	0.193595	0.239129	0.196965	-0.126433	-0.00369743	-0.0810138	0.0374086	-0.0212165	0.12087	0.18757	0.365876	0.195529	0.0506878	-0.47926	0.199032	0.143497	0.200996	0.228885	0.221129	0.0639213	-0.0447139	0.0989425	0.180373	0.118284	-0.0518326	-0.138366	0.0442932	-0.170218	-0.0953246	-0.0653786	0.0342599	-0.0937415	0.14633	0.0363119	0.00153668	0.409517	3.53217e-09	0.000958502	5.82379e-13	4.9102e-06	0.243244	0.924352	0.0678105	0.395522	0.778633
Stimulaotry	TNF	0.40001	0.152612	0.170558	0.168447	0.30252	0.312256	0.0688783	-0.173343	-0.162182	0.130424	0.0593014	0.128849	0.135992	0.151124	0.255053	0.203104	-0.341225	0.239125	-0.0399626	0.0477055	0.166898	0.223517	0.035972	-0.0829052	0.130476	0.264781	0.00881195	0.0821617	0.0574268	0.0615399	-0.180185	-0.078756	0.0739908	0.000124109	-0.0390461	0.0411993	0.128713	0.000259762	0.22121	0.00100428	0.00414742	3.63905e-20	1.88904e-13	0.526136	7.27146e-06	0.000238446	0.00293992	0.431693
Stimulaotry	TNFRSF18	0.443592	0.0798257	0.26751	0.0703877	0.186482	0.136115	0.0551758	0.218785	0.144488	0.136546	0.249283	0.299062	0.251028	0.0937446	0.246185	-0.0967676	-0.377021	-0.396889	-0.325684	-0.154099	0.159905	0.211544	0.000516572	0.0330013	0.0157948	0.12745	0.0938375	0.0289292	-0.0266663	-0.0653077	-0.082446	-0.28969	-0.131305	-0.122801	0.042636	-0.098617	0.0164466	4.23067e-05	0.524037	1.82191e-07	0.233732	2.32734e-08	0.00168462	0.611742	1.28825e-08	0.00107942	0.00184047	0.000792062
Stimulaotry	TNFRSF4	0.333059	0.0737475	0.337719	0.112664	0.0947037	-0.0120425	0.191799	0.293583	0.157507	0.146305	0.0828098	0.224193	0.197178	0.116943	0.0731574	-0.0808051	-0.202972	-0.315836	-0.0978505	-0.0585678	0.099919	-0.0250489	0.00903939	-0.0684874	-0.0703134	-0.0591092	0.0802139	0.0581309	-0.0963082	-0.146964	0.0460991	-0.216989	-0.197614	0.13488	-0.0580824	0.189286	0.229797	0.00270657	0.556209	2.69954e-11	0.0561655	0.00483097	0.782091	0.0751308	1.25861e-14	0.000360976	0.000838417	0.271801
Stimulaotry	CD40	-0.164354	0.0723325	0.134575	0.301319	0.287338	0.184265	-0.100349	0.130351	-0.0339637	0.27606	0.125888	0.205963	0.179289	0.101368	-0.0797147	0.0443618	-0.421658	0.242565	0.105961	0.0614476	0.0941753	0.0613261	0.00497556	-0.0457446	0.0104694	0.096357	-0.0286858	0.217866	-0.0452186	-0.174515	-0.160986	-0.144555	-0.168259	0.214027	0.0869811	-0.130889	0.105889	0.147789	0.563831	0.00965052	1.85846e-07	2.89377e-18	1.96631e-05	0.355075	0.00077419	0.444514	1.63233e-10	0.0940541
Stimulaotry	GZMA	0.320281	0.0412703	0.153662	0.12446	0.192129	0.106691	0.0191428	0.152961	0.0672617	0.1008	0.144941	0.274168	0.227728	0.0726017	0.112643	0.00610609	-0.450546	0.0366656	0.184527	-0.0560483	0.0518282	-0.0824851	-0.117895	-0.113021	-0.115158	-0.176936	0.0940816	-0.0330088	-0.0591072	-0.101235	-0.268538	-0.153341	-0.23926	-0.0660973	-0.041264	-0.260415	-0.0827186	0.00400765	0.742144	0.00308302	0.0347563	8.50984e-09	0.0139938	0.860305	7.76886e-05	0.129651	0.0217635	0.0535658
Stimulaotry	CCL5	0.359873	0.165143	0.165359	0.0857458	0.225532	0.161265	0.0993462	0.179736	0.0752434	0.0642025	0.110761	0.263495	0.214197	0.0459	0.132321	0.0663826	-0.381418	-0.0076609	0.150151	-0.145273	-0.0208414	-0.142484	-0.182026	-0.101883	-0.161088	-0.218547	0.0709232	-0.00473797	-0.0250388	-0.152479	-0.195382	-0.210065	-0.0900852	-0.0721624	-0.0429035	-0.0662701	-0.0632761	0.00112394	0.185135	0.00143436	0.146641	1.17172e-11	0.000192797	0.359927	3.26038e-06	0.0899239	0.14451	0.141061
Stimulaotry	IFNG	0.433816	0.29054	0.180173	0.132831	0.250968	0.216159	0.145595	0.102458	0.0890617	0.0864765	0.245695	0.243802	0.222785	0.163564	0.213656	0.159005	-0.312361	0.190345	0.311713	0.0521682	0.222333	0.0831356	-0.0458941	0.0396735	-0.0759933	-0.104316	0.181986	-0.00206723	0.00577818	0.00302667	-0.0967846	-0.0509728	-0.236754	-0.0425617	0.125782	0.0135377	-0.0396634	6.49634e-05	0.0179544	0.000505619	0.0241699	3.65329e-14	5.05755e-07	0.178445	0.00833635	0.0446032	0.0491712	0.000947367
Stimulaotry	PRF1	0.412499	0.190386	0.134352	0.178597	0.234753	0.171685	-0.0254657	0.268197	0.157858	0.167161	0.161231	0.330906	0.245581	0.0041132	0.195586	0.107537	0.0150087	0.0295748	0.22701	0.00148073	0.19376	0.0551141	-0.0923686	-0.0718184	-0.026232	-0.0847373	0.0403238	0.0923214	-0.00727776	-0.0382238	-0.0995734	-0.00372467	-0.158215	0.0932241	0.0676564	-0.101074	0.0676843	0.000158342	0.125722	0.00977205	0.00234853	1.56221e-12	7.10634e-05	0.814883	2.27603e-12	0.000350074	0.000132236	0.0315536
Stimulaotry	TNFSF4	0.426094	0.522024	0.414346	0.337761	0.395795	0.373604	0.376763	0.143836	0.12083	0.23829	0.170657	-0.00944119	-0.0358511	-0.103526	0.176154	0.0875104	0.259192	0.103181	0.17896	0.196922	0.194978	0.1044	0.120424	0.0483823	-0.0364832	0.0364227	0.216346	0.131267	0.11149	0.315912	-0.126764	0.0206011	0.128979	0.0904576	0.260225	0.160348	0.249294	9.03294e-05	6.94779e-06	9.67333e-17	4.08321e-09	1.5762e-34	5.32903e-19	0.000322047	0.000204694	0.00634572	4.02915e-08	0.0227541
Stimulaotry	CD28	0.45539	0.37456	0.18998	0.264532	0.344481	0.255688	0.138054	0.1727	0.0422505	0.170205	0.0848132	0.0910998	0.0845529	0.0690048	0.115632	0.122241	0.482613	0.0497966	-0.0538024	0.16398	0.0148805	-0.0893252	0.053774	-0.138077	-0.147501	-0.126418	-0.0917836	-0.0354381	0.0762109	0.0372047	-0.0272905	0.113632	0.153808	0.0954536	-0.0458547	0.00846896	0.24245	2.477e-05	0.00194542	0.00024207	5.33772e-06	4.95596e-26	2.34299e-09	0.202247	7.87074e-06	0.341454	9.90641e-05	0.260332
Stimulaotry	ICOS	0.369054	0.188542	0.248152	0.202748	0.293261	0.242056	0.117418	0.209562	0.168601	0.150425	0.137426	0.188871	0.190365	0.196141	0.162643	0.204833	0.592871	-0.0382251	0.226446	-0.0475904	0.203169	0.12693	-0.0635117	-0.122781	-0.0578698	-0.0421541	0.0119704	-0.0617185	0.0259833	0.0973677	-0.178741	-0.010329	-0.0373252	-0.0762078	-0.019388	-0.124111	0.00827279	0.000817135	0.129496	1.39049e-06	0.000536567	5.41447e-19	1.66598e-08	0.27876	5.26153e-08	0.000132451	0.000592744	0.0673612
Stimulaotry	ITGB2	0.369525	0.375707	0.297578	0.155107	0.362184	0.322224	0.116499	0.0920806	-0.00473709	0.131065	0.149443	0.151255	0.130855	0.0669358	0.172617	0.059531	0.404678	0.0655046	0.0847881	0.0382348	0.0958414	-0.00946259	-0.0178033	-0.160373	-0.178985	-0.0650882	-0.115594	0.0518094	0.131746	0.0346023	-0.180711	-0.117661	-0.090542	-0.0363626	0.00354648	-0.112728	0.0396166	0.000803689	0.00187926	5.55986e-09	0.00836978	8.62147e-29	2.86237e-14	0.282566	0.0178009	0.915097	0.00280182	0.0464846
Stimulaotry	BTN3A1	0.427545	0.471725	0.0991217	0.475754	0.41051	0.314634	-0.0815375	0.396227	0.394382	0.175979	0.251699	0.192872	0.156691	0.0492166	0.141206	0.16065	-0.223951	0.236793	0.371457	0.202919	0.200905	0.111669	0.0924974	-0.0873175	0.0780114	-0.0431533	0.00720192	0.066293	0.319127	0.170293	0.156456	-0.0247534	0.145689	0.174349	0.179493	0.273365	0.249901	8.49566e-05	6.38041e-05	0.057133	1.13118e-17	2.93995e-37	1.21204e-13	0.452783	2.59655e-26	2.17255e-20	5.64928e-05	0.000701073
Stimulaotry	BTN3A2	0.465432	0.398877	0.127844	0.335925	0.342457	0.214348	-0.0302076	0.2787	0.237575	0.13407	0.190373	0.252786	0.230516	0.155956	0.105375	0.120268	0.0224773	0.0882995	0.381059	0.183181	0.152753	0.0519486	0.103711	0.0212265	0.0628218	-0.119317	-0.0123173	-0.0373144	0.230708	0.0134131	0.0675771	-0.0863494	0.190055	0.0754192	0.149104	0.299163	0.160183	1.54587e-05	0.000908533	0.0139882	5.01023e-09	9.98658e-26	6.32481e-07	0.781207	2.82699e-13	5.80818e-08	0.00222944	0.0109178
Stimulaotry	ENTPD1	-0.105138	0.310768	0.335764	0.454887	0.32198	0.240492	0.337718	0.304361	0.21102	0.192743	0.215789	0.0229369	0.0207611	0.0234288	0.0589072	-0.0241472	-0.442084	0.250173	0.138743	0.124463	-0.0318854	-0.0812161	-0.24607	-0.200311	0.0260913	-0.107952	0.00862239	0.0887044	0.0695181	0.0820948	0.0880576	0.0144489	0.0975054	0.441643	0.025518	0.229309	0.303346	0.35645	0.0110955	3.5648e-11	4.09304e-16	9.02106e-23	2.07129e-08	0.00137904	1.17597e-15	1.5606e-06	9.97812e-06	0.00381746
Stimulaotry	TLR4	0.159343	0.140937	0.166975	0.367077	0.287298	0.281774	0.132954	-0.145074	-0.115634	0.18953	0.215754	-0.169019	-0.092737	0.14927	-0.0404959	0.0770302	-0.388091	0.360971	0.240534	0.143588	0.0966542	-0.0265101	0.0265876	-0.0903691	-0.0361384	-0.11081	-0.00464911	-0.130008	0.190931	0.110468	-0.048736	0.159042	0.0493913	0.381812	0.105747	0.0860586	0.166707	0.160713	0.259004	0.00128534	1.29116e-10	2.92674e-18	3.9505e-11	0.219583	0.000180081	0.00902327	1.40785e-05	0.00382336
[truncated: 26 more columns]
